# Supplementary material
Source: MDPI journal article supplement (https://www.mdpi.com/2227-7390/11/7/1582)
Supplement: s1 [file s1]

[TITLE]

Scenario: MODELO 2013-A

Date: 02-06-2015 11:18:58

[JUNCTIONS]

| ;ID   | Elev             | Demand | Pattern |   |
|-------|------------------|--------|---------|---|
| 18463 | 207.012283325195 | 0.00   | 1       |   |
| ;     |                  |        |         |   |
| 18464 | 207.059219360352 | 0.00   | 1       |   |
| ;     |                  |        |         |   |
| 18465 | 201.100082397461 | 0.01   | 1       |   |
| ;     |                  |        |         |   |
| 18466 | 200.846878051758 | 0.04   | 1       |   |
| ;     |                  |        |         |   |
| 18467 | 204.061538696289 | 0.02   | 1       |   |
| ;     |                  |        |         |   |
| 18468 | 203.607025146484 | 0.02   | 1       |   |
| ;     |                  |        |         |   |
| 18469 | 203.706848144531 | 0.01   | 1       |   |
| ;     |                  |        |         |   |
| 18470 | 203.448745727539 | 0.01   | 1       |   |
| ;     |                  |        |         |   |
| 18471 | 202.857070922852 | 0.01   | 1       |   |
| ;     |                  |        |         |   |
| 18472 | 202.916610717773 | 0.01   | 1       |   |
| ;     |                  |        |         |   |
| 18473 | 203.185943603516 | 0.05   | 1       |   |
| ;     |                  |        |         |   |
| 18474 | 203.522796630859 | 0.01   | 1       |   |
| ;     |                  |        |         |   |
| 18475 | 221.48567199707  | 0.01   | 1       | ; |
| 18476 | 221.394607543945 | 0.00   | 1       |   |
| ;     |                  |        |         |   |
| 18477 | 221.365600585938 | 0.03   | 1       |   |
| ;     |                  |        |         |   |
| 18478 | 222.021636962891 | 0.06   | 1       |   |
| ;     |                  |        |         |   |
| 18479 | 222.222061157227 | 0.00   | 1       |   |
| ;     |                  |        |         |   |
| 18480 | 199.355239868164 | 0.04   | 1       |   |
| ;     |                  |        |         |   |
| 18481 | 199.355987548828 | 0.01   | 1       |   |
| ;     |                  |        |         |   |
| 18482 | 198.905227661133 | 0.01   | 1       |   |
| ;     |                  |        |         |   |
| 18483 | 198.9228515625   | 0.02   | 1       | ; |
| 18484 | 200.496246337891 | 0.01   | 1       |   |
| ;     |                  |        |         |   |
| 18485 | 200.48371887207  | 0.00   | 1       | ; |
| 18486 | 196.565307617188 | 0.00   | 1       |   |

|       |                  |      |   |   |   |
|-------|------------------|------|---|---|---|
| ;     |                  |      |   |   |   |
| 18487 | 196.578186035156 | 0.02 |   | 1 |   |
| ;     |                  |      |   |   |   |
| 18488 | 199.117736816406 | 0.03 |   | 1 |   |
| ;     |                  |      |   |   |   |
| 18489 | 199.183700561523 | 0.01 |   | 1 |   |
| ;     |                  |      |   |   |   |
| 18490 | 199.097061157227 | 0.00 |   | 1 |   |
| ;     |                  |      |   |   |   |
| 18491 | 199.398895263672 | 0.01 |   | 1 |   |
| ;     |                  |      |   |   |   |
| 18492 | 199.407348632813 | 0.08 |   | 1 |   |
| ;     |                  |      |   |   |   |
| 18493 | 200.864105224609 | 0.01 |   | 1 |   |
| ;     |                  |      |   |   |   |
| 18494 | 200.856948852539 | 0.07 |   | 1 |   |
| ;     |                  |      |   |   |   |
| 18495 | 198.978637695313 | 0.00 |   | 1 |   |
| ;     |                  |      |   |   |   |
| 18496 | 198.987182617188 | 0.04 |   | 1 |   |
| ;     |                  |      |   |   |   |
| 18497 | 219.01741027832  | 0.02 | 1 |   | ; |
| 18498 | 219.02375793457  | 0.01 | 1 |   | ; |
| 18499 | 219.344985961914 | 0.01 |   | 1 |   |
| ;     |                  |      |   |   |   |
| 18500 | 219.350997924805 | 0.01 |   | 1 |   |
| ;     |                  |      |   |   |   |
| 18501 | 219.646530151367 | 0.02 |   | 1 |   |
| ;     |                  |      |   |   |   |
| 18502 | 219.651092529297 | 0.01 |   | 1 |   |
| ;     |                  |      |   |   |   |
| 18503 | 218.823211669922 | 0.04 |   | 1 |   |
| ;     |                  |      |   |   |   |
| 18504 | 218.835311889648 | 0.01 |   | 1 |   |
| ;     |                  |      |   |   |   |
| 18505 | 218.706390380859 | 0.02 |   | 1 |   |
| ;     |                  |      |   |   |   |
| 18506 | 218.719192504883 | 0.00 |   | 1 |   |
| ;     |                  |      |   |   |   |
| 18507 | 218.641372680664 | 0.03 |   | 1 |   |
| ;     |                  |      |   |   |   |
| 18508 | 218.654266357422 | 0.00 |   | 1 |   |
| ;     |                  |      |   |   |   |
| 18509 | 218.33332824707  | 0.03 | 1 |   | ; |
| 18510 | 218.341003417969 | 0.07 |   | 1 |   |
| ;     |                  |      |   |   |   |
| 18511 | 218.086853027344 | 0.03 |   | 1 |   |
| ;     |                  |      |   |   |   |
| 18512 | 218.101928710938 | 0.00 |   | 1 |   |
| ;     |                  |      |   |   |   |

|       |                  |      |   |   |
|-------|------------------|------|---|---|
| 18513 | 218.227844238281 | 0.19 | 1 |   |
| ;     |                  |      |   |   |
| 18514 | 218.242431640625 | 0.00 | 1 |   |
| ;     |                  |      |   |   |
| 18515 | 198.235870361328 | 0.00 | 1 |   |
| ;     |                  |      |   |   |
| 18516 | 198.300567626953 | 0.00 | 1 |   |
| ;     |                  |      |   |   |
| 18517 | 199.031997680664 | 0.04 | 1 |   |
| ;     |                  |      |   |   |
| 18518 | 199.043472290039 | 0.01 | 1 |   |
| ;     |                  |      |   |   |
| 18519 | 206.429138183594 | 0.01 | 1 |   |
| ;     |                  |      |   |   |
| 18520 | 206.584136962891 | 0.01 | 1 |   |
| ;     |                  |      |   |   |
| 18521 | 213.468719482422 | 0.05 | 1 |   |
| ;     |                  |      |   |   |
| 18522 | 212.454772949219 | 0.04 | 1 |   |
| ;     |                  |      |   |   |
| 18523 | 199.23291015625  | 0.01 | 1 |   |
| 18524 | 200              | 0.03 | 1 | ; |
| 18525 | 229.875106811523 | 0.00 | 1 | ; |
| ;     |                  |      |   |   |
| 18526 | 229.892532348633 | 0.00 | 1 |   |
| ;     |                  |      |   |   |
| 18527 | 231.145767211914 | 0.02 | 1 |   |
| ;     |                  |      |   |   |
| 18528 | 231.130401611328 | 0.08 | 1 |   |
| ;     |                  |      |   |   |
| 18529 | 209.287628173828 | 0.00 | 1 |   |
| ;     |                  |      |   |   |
| 18530 | 209.311874389648 | 0.00 | 1 |   |
| ;     |                  |      |   |   |
| 18531 | 209.26335144043  | 0.04 | 1 |   |
| 18532 | 206.527236938477 | 0.10 | 1 | ; |
| ;     |                  |      |   |   |
| 18533 | 206.513458251953 | 0.15 | 1 |   |
| ;     |                  |      |   |   |
| 18534 | 206.513870239258 | 0.01 | 1 |   |
| ;     |                  |      |   |   |
| 18535 | 213.223342895508 | 0.00 | 1 |   |
| ;     |                  |      |   |   |
| 18536 | 213.213195800781 | 0.01 | 1 |   |
| ;     |                  |      |   |   |
| 18537 | 213.220230102539 | 0.07 | 1 |   |
| ;     |                  |      |   |   |
| 18538 | 203.683853149414 | 0.04 | 1 |   |
| ;     |                  |      |   |   |
| 18539 | 204.482299804688 | 0.04 | 1 |   |

|       |                  |      |   |   |  |   |
|-------|------------------|------|---|---|--|---|
| ;     |                  |      |   |   |  |   |
| 18540 | 204.94287109375  | 0.09 | 1 |   |  | ; |
| 18541 | 204.931655883789 | 0.01 |   | 1 |  |   |
| ;     |                  |      |   |   |  |   |
| 18542 | 204.869781494141 | 0.00 |   | 1 |  |   |
| ;     |                  |      |   |   |  |   |
| 18543 | 204.496246337891 | 0.09 |   | 1 |  |   |
| ;     |                  |      |   |   |  |   |
| 18544 | 204.674942016602 | 0.05 |   | 1 |  |   |
| ;     |                  |      |   |   |  |   |
| 18545 | 204.897171020508 | 0.05 |   | 1 |  |   |
| ;     |                  |      |   |   |  |   |
| 18546 | 204.989196777344 | 0.00 |   | 1 |  |   |
| ;     |                  |      |   |   |  |   |
| 18547 | 205              | 0.06 | 1 |   |  | ; |
| 18548 | 205              | 0.05 | 1 |   |  | ; |
| 18549 | 205              | 0.03 | 1 |   |  | ; |
| 18550 | 225.004257202148 | 0.02 |   | 1 |  |   |
| ;     |                  |      |   |   |  |   |
| 18551 | 224.382736206055 | 0.00 |   | 1 |  |   |
| ;     |                  |      |   |   |  |   |
| 18552 | 208.616027832031 | 0.07 |   | 1 |  |   |
| ;     |                  |      |   |   |  |   |
| 18553 | 208.515060424805 | 0.04 |   | 1 |  |   |
| ;     |                  |      |   |   |  |   |
| 18554 | 208.351669311523 | 0.02 |   | 1 |  |   |
| ;     |                  |      |   |   |  |   |
| 18555 | 208.741775512695 | 0.07 |   | 1 |  |   |
| ;     |                  |      |   |   |  |   |
| 18556 | 216.672958374023 | 0.08 |   | 1 |  |   |
| ;     |                  |      |   |   |  |   |
| 18557 | 217.377807617188 | 0.02 |   | 1 |  |   |
| ;     |                  |      |   |   |  |   |
| 18558 | 217.425384521484 | 0.02 |   | 1 |  |   |
| ;     |                  |      |   |   |  |   |
| 18559 | 217.393981933594 | 0.02 |   | 1 |  |   |
| ;     |                  |      |   |   |  |   |
| 18560 | 229.869064331055 | 0.01 |   | 1 |  |   |
| ;     |                  |      |   |   |  |   |
| 18561 | 229.583557128906 | 0.00 |   | 1 |  |   |
| ;     |                  |      |   |   |  |   |
| 18562 | 215.108688354492 | 0.04 |   | 1 |  |   |
| ;     |                  |      |   |   |  |   |
| 18563 | 214.969192504883 | 0.03 |   | 1 |  |   |
| ;     |                  |      |   |   |  |   |
| 18564 | 220              | 0.03 | 1 |   |  | ; |
| 18565 | 220              | 0.01 | 1 |   |  | ; |
| 18566 | 220              | 0.02 | 1 |   |  | ; |
| 18567 | 228.992050170898 | 0.04 |   | 1 |  |   |
| ;     |                  |      |   |   |  |   |

|       |                  |      |   |   |
|-------|------------------|------|---|---|
| 18568 | 228.713394165039 | 0.04 | 1 |   |
| ;     |                  |      |   |   |
| 18569 | 228.183685302734 | 0.01 | 1 |   |
| ;     |                  |      |   |   |
| 18570 | 228.187957763672 | 0.01 | 1 |   |
| ;     |                  |      |   |   |
| 18571 | 191.106369018555 | 0.02 | 1 |   |
| ;     |                  |      |   |   |
| 18572 | 191.289474487305 | 0.03 | 1 |   |
| ;     |                  |      |   |   |
| 18573 | 207.902465820313 | 0.03 | 1 |   |
| ;     |                  |      |   |   |
| 18574 | 207.890197753906 | 0.04 | 1 |   |
| ;     |                  |      |   |   |
| 18575 | 214.706741333008 | 0.01 | 1 |   |
| ;     |                  |      |   |   |
| 18576 | 214.573028564453 | 0.02 | 1 |   |
| ;     |                  |      |   |   |
| 18577 | 196.886001586914 | 0.03 | 1 |   |
| ;     |                  |      |   |   |
| 18578 | 196.969223022461 | 0.04 | 1 |   |
| ;     |                  |      |   |   |
| 18579 | 194.284393310547 | 0.01 | 1 |   |
| ;     |                  |      |   |   |
| 18580 | 194.150390625    | 0.01 | 1 | ; |
| 18581 | 193.006072998047 | 0.01 | 1 |   |
| ;     |                  |      |   |   |
| 18582 | 193.075622558594 | 0.02 | 1 |   |
| ;     |                  |      |   |   |
| 18583 | 192.320098876953 | 0.02 | 1 |   |
| ;     |                  |      |   |   |
| 18584 | 192.23649597168  | 0.00 | 1 | ; |
| 18585 | 192.145614624023 | 0.00 | 1 |   |
| ;     |                  |      |   |   |
| 18586 | 191.683166503906 | 0.01 | 1 |   |
| ;     |                  |      |   |   |
| 18587 | 191.554809570313 | 0.00 | 1 |   |
| ;     |                  |      |   |   |
| 18588 | 193.413665771484 | 0.03 | 1 |   |
| ;     |                  |      |   |   |
| 18589 | 193.138900756836 | 0.02 | 1 |   |
| ;     |                  |      |   |   |
| 18590 | 193.560577392578 | 0.02 | 1 |   |
| ;     |                  |      |   |   |
| 18591 | 193.389602661133 | 0.01 | 1 |   |
| ;     |                  |      |   |   |
| 18592 | 207.056106567383 | 0.17 | 1 |   |
| ;     |                  |      |   |   |
| 18593 | 206.780868530273 | 0.02 | 1 |   |
| ;     |                  |      |   |   |

|       |                  |      |   |   |  |   |
|-------|------------------|------|---|---|--|---|
| 18594 | 200              | 0.03 | 1 |   |  | ; |
| 18595 | 200              | 0.01 | 1 |   |  | ; |
| 18596 | 197.91047668457  | 0.06 | 1 |   |  | ; |
| 18597 | 197.201110839844 | 0.04 |   | 1 |  |   |
| ;     |                  |      |   |   |  |   |
| 18598 | 201.721405029297 | 0.02 |   | 1 |  |   |
| ;     |                  |      |   |   |  |   |
| 18599 | 201.427108764648 | 0.02 |   | 1 |  |   |
| ;     |                  |      |   |   |  |   |
| 18600 | 195.532485961914 | 0.02 |   | 1 |  |   |
| ;     |                  |      |   |   |  |   |
| 18601 | 195.385345458984 | 0.01 |   | 1 |  |   |
| ;     |                  |      |   |   |  |   |
| 18602 | 195.441452026367 | 0.02 |   | 1 |  |   |
| ;     |                  |      |   |   |  |   |
| 18603 | 195.517959594727 | 0.00 |   | 1 |  |   |
| ;     |                  |      |   |   |  |   |
| 18604 | 197.597732543945 | 0.03 |   | 1 |  |   |
| ;     |                  |      |   |   |  |   |
| 18605 | 197.37580871582  | 0.03 | 1 |   |  | ; |
| 18606 | 197.604293823242 | 0.00 |   | 1 |  |   |
| ;     |                  |      |   |   |  |   |
| 18607 | 197.356872558594 | 0.00 |   | 1 |  |   |
| ;     |                  |      |   |   |  |   |
| 18608 | 195.926879882813 | 0.01 |   | 1 |  |   |
| ;     |                  |      |   |   |  |   |
| 18609 | 195.70002746582  | 0.02 | 1 |   |  | ; |
| 18610 | 195.493881225586 | 0.00 |   | 1 |  |   |
| ;     |                  |      |   |   |  |   |
| 18611 | 195.528213500977 | 0.00 |   | 1 |  |   |
| ;     |                  |      |   |   |  |   |
| 18612 | 199.605895996094 | 0.01 |   | 1 |  |   |
| ;     |                  |      |   |   |  |   |
| 18613 | 199.578704833984 | 0.01 |   | 1 |  |   |
| ;     |                  |      |   |   |  |   |
| 18614 | 227.086242675781 | 0.00 |   | 1 |  |   |
| ;     |                  |      |   |   |  |   |
| 18615 | 227.069580078125 | 0.03 |   | 1 |  |   |
| ;     |                  |      |   |   |  |   |
| 18616 | 220.190322875977 | 0.02 |   | 1 |  |   |
| ;     |                  |      |   |   |  |   |
| 18617 | 220.19172668457  | 0.02 | 1 |   |  | ; |
| 18618 | 220.18896484375  | 0.00 | 1 |   |  | ; |
| 18619 | 220.177642822266 | 0.00 |   | 1 |  |   |
| ;     |                  |      |   |   |  |   |
| 18620 | 220.203491210938 | 0.00 |   | 1 |  |   |
| ;     |                  |      |   |   |  |   |
| 18621 | 220.494018554688 | 0.02 |   | 1 |  |   |
| ;     |                  |      |   |   |  |   |
| 18622 | 220.51106262207  | 0.01 | 1 |   |  | ; |

|       |                  |      |   |   |  |  |
|-------|------------------|------|---|---|--|--|
| 18623 | 220.4853515625   | 0.00 | 1 |   |  |  |
| 18624 | 220.556762695313 | 0.03 |   | 1 |  |  |
| ;     |                  |      |   |   |  |  |
| 18625 | 220.547653198242 | 0.01 |   | 1 |  |  |
| ;     |                  |      |   |   |  |  |
| 18626 | 220.565902709961 | 0.00 |   | 1 |  |  |
| ;     |                  |      |   |   |  |  |
| 18627 | 197.892272949219 | 0.01 |   | 1 |  |  |
| ;     |                  |      |   |   |  |  |
| 18628 | 197.89811706543  | 0.02 | 1 |   |  |  |
| 18629 | 197.57878112793  | 0.01 | 1 |   |  |  |
| 18630 | 197.58544921875  | 0.02 | 1 |   |  |  |
| 18631 | 205.243041992188 | 0.04 |   | 1 |  |  |
| ;     |                  |      |   |   |  |  |
| 18632 | 205.591522216797 | 0.36 |   | 1 |  |  |
| ;     |                  |      |   |   |  |  |
| 18633 | 210.198303222656 | 0.00 |   | 1 |  |  |
| ;     |                  |      |   |   |  |  |
| 18634 | 210.157455444336 | 0.00 |   | 1 |  |  |
| ;     |                  |      |   |   |  |  |
| 18635 | 202.504257202148 | 0.01 |   | 1 |  |  |
| ;     |                  |      |   |   |  |  |
| 18636 | 202.549697875977 | 0.01 |   | 1 |  |  |
| ;     |                  |      |   |   |  |  |
| 18637 | 206.037567138672 | 0.01 |   | 1 |  |  |
| ;     |                  |      |   |   |  |  |
| 18638 | 206.197677612305 | 0.00 |   | 1 |  |  |
| ;     |                  |      |   |   |  |  |
| 18639 | 205.699569702148 | 0.05 |   | 1 |  |  |
| ;     |                  |      |   |   |  |  |
| 18640 | 206.020080566406 | 0.03 |   | 1 |  |  |
| ;     |                  |      |   |   |  |  |
| 18641 | 206.078918457031 | 0.04 |   | 1 |  |  |
| ;     |                  |      |   |   |  |  |
| 18642 | 206.608154296875 | 0.06 |   | 1 |  |  |
| ;     |                  |      |   |   |  |  |
| 18643 | 204.54997253418  | 0.08 | 1 |   |  |  |
| 18644 | 206.102813720703 | 0.06 |   | 1 |  |  |
| ;     |                  |      |   |   |  |  |
| 18645 | 227.606918334961 | 0.00 |   | 1 |  |  |
| ;     |                  |      |   |   |  |  |
| 18646 | 227.567398071289 | 0.03 |   | 1 |  |  |
| ;     |                  |      |   |   |  |  |
| 18647 | 206.258193969727 | 0.04 |   | 1 |  |  |
| ;     |                  |      |   |   |  |  |
| 18648 | 206.082168579102 | 0.02 |   | 1 |  |  |
| ;     |                  |      |   |   |  |  |
| 18649 | 206.068206787109 | 0.01 |   | 1 |  |  |
| ;     |                  |      |   |   |  |  |
| 18650 | 206.096466064453 | 0.00 |   | 1 |  |  |

|       |                      |      |   |   |   |
|-------|----------------------|------|---|---|---|
| ;     |                      |      |   |   |   |
| 18651 | 202.486297607422     | 0.01 |   | 1 |   |
| ;     |                      |      |   |   |   |
| 18652 | 201.87158203125 0.00 |      | 1 |   | ; |
| 18653 | 202.646820068359     | 0.03 |   | 1 |   |
| ;     |                      |      |   |   |   |
| 18654 | 202.721572875977     | 0.02 |   | 1 |   |
| ;     |                      |      |   |   |   |
| 18655 | 217.220352172852     | 0.00 |   | 1 |   |
| ;     |                      |      |   |   |   |
| 18656 | 217.192398071289     | 0.00 |   | 1 |   |
| ;     |                      |      |   |   |   |
| 18657 | 217.172470092773     | 0.00 |   | 1 |   |
| ;     |                      |      |   |   |   |
| 18658 | 216.763366699219     | 0.00 |   | 1 |   |
| ;     |                      |      |   |   |   |
| 18659 | 201.363723754883     | 0.02 |   | 1 |   |
| ;     |                      |      |   |   |   |
| 18660 | 202.619812011719     | 0.02 |   | 1 |   |
| ;     |                      |      |   |   |   |
| 18661 | 201.295989990234     | 0.03 |   | 1 |   |
| ;     |                      |      |   |   |   |
| 18662 | 201.4326171875 0.03  |      | 1 |   | ; |
| 18663 | 202.809768676758     | 0.01 |   | 1 |   |
| ;     |                      |      |   |   |   |
| 18664 | 203.139007568359     | 0.03 |   | 1 |   |
| ;     |                      |      |   |   |   |
| 18665 | 204.133972167969     | 0.07 |   | 1 |   |
| ;     |                      |      |   |   |   |
| 18666 | 203.402130126953     | 0.01 |   | 1 |   |
| ;     |                      |      |   |   |   |
| 18667 | 202.944717407227     | 0.05 |   | 1 |   |
| ;     |                      |      |   |   |   |
| 18668 | 233.833114624023     | 0.02 |   | 1 |   |
| ;     |                      |      |   |   |   |
| 18669 | 233.951553344727     | 0.01 |   | 1 |   |
| ;     |                      |      |   |   |   |
| 18670 | 233.509719848633     | 0.03 |   | 1 |   |
| ;     |                      |      |   |   |   |
| 18671 | 234.055252075195     | 0.02 |   | 1 |   |
| ;     |                      |      |   |   |   |
| 18672 | 203.324264526367     | 0.02 |   | 1 |   |
| ;     |                      |      |   |   |   |
| 18673 | 202.456161499023     | 0.16 |   | 1 |   |
| ;     |                      |      |   |   |   |
| 18674 | 203.129364013672     | 0.01 |   | 1 |   |
| ;     |                      |      |   |   |   |
| 18675 | 203.433868408203     | 0.01 |   | 1 |   |
| ;     |                      |      |   |   |   |
| 18676 | 195.601928710938     | 0.00 |   | 1 |   |



|       |                  |      |   |  |   |
|-------|------------------|------|---|--|---|
| ;     |                  |      |   |  |   |
| 18677 | 195.893264770508 | 0.00 | 1 |  |   |
| ;     |                  |      |   |  |   |
| 18678 | 196.721237182617 | 0.08 | 1 |  |   |
| ;     |                  |      |   |  |   |
| 18679 | 195.936889648438 | 0.06 | 1 |  |   |
| ;     |                  |      |   |  |   |
| 18680 | 207.519760131836 | 0.02 | 1 |  |   |
| ;     |                  |      |   |  |   |
| 18681 | 207.649505615234 | 0.03 | 1 |  |   |
| ;     |                  |      |   |  |   |
| 18682 | 205              | 0.02 | 1 |  | ; |
| 18683 | 205              | 0.01 | 1 |  | ; |
| 18684 | 205              | 0.01 | 1 |  | ; |
| 18685 | 205              | 0.03 | 1 |  | ; |
| 18686 | 205              | 0.02 | 1 |  | ; |
| 18687 | 205              | 0.01 | 1 |  | ; |
| 18688 | 209.775146484375 | 0.07 | 1 |  |   |
| ;     |                  |      |   |  |   |
| 18689 | 209.499282836914 | 0.04 | 1 |  |   |
| ;     |                  |      |   |  |   |
| 18690 | 199.646011352539 | 0.01 | 1 |  |   |
| ;     |                  |      |   |  |   |
| 18691 | 199.679870605469 | 0.01 | 1 |  |   |
| ;     |                  |      |   |  |   |
| 18692 | 196.281936645508 | 0.01 | 1 |  |   |
| ;     |                  |      |   |  |   |
| 18693 | 196.039108276367 | 0.02 | 1 |  |   |
| ;     |                  |      |   |  |   |
| 18694 | 194.958465576172 | 0.01 | 1 |  |   |
| ;     |                  |      |   |  |   |
| 18695 | 194.912185668945 | 0.00 | 1 |  |   |
| ;     |                  |      |   |  |   |
| 18696 | 195.776763916016 | 0.01 | 1 |  |   |
| ;     |                  |      |   |  |   |
| 18697 | 195.840606689453 | 0.00 | 1 |  |   |
| ;     |                  |      |   |  |   |
| 18698 | 207.380157470703 | 0.00 | 1 |  |   |
| ;     |                  |      |   |  |   |
| 18699 | 207.415328979492 | 0.02 | 1 |  |   |
| ;     |                  |      |   |  |   |
| 18700 | 206.437866210938 | 0.01 | 1 |  |   |
| ;     |                  |      |   |  |   |
| 18701 | 206.880798339844 | 0.02 | 1 |  |   |
| ;     |                  |      |   |  |   |
| 18702 | 206.037292480469 | 0.02 | 1 |  |   |
| ;     |                  |      |   |  |   |
| 18703 | 206.203384399414 | 0.01 | 1 |  |   |
| ;     |                  |      |   |  |   |
| 18704 | 198.802459716797 | 0.04 | 1 |  |   |

|       |                  |      |   |   |   |
|-------|------------------|------|---|---|---|
| ;     |                  |      |   |   |   |
| 18705 | 198.989944458008 | 0.02 |   | 1 |   |
| ;     |                  |      |   |   |   |
| 18706 | 205              | 0.02 | 1 |   | ; |
| 18707 | 205              | 0.02 | 1 |   | ; |
| 18708 | 220.405380249023 | 0.00 |   | 1 |   |
| ;     |                  |      |   |   |   |
| 18709 | 220.699325561523 | 0.06 |   | 1 |   |
| ;     |                  |      |   |   |   |
| 18710 | 196.036483764648 | 0.02 |   | 1 |   |
| ;     |                  |      |   |   |   |
| 18711 | 195.556182861328 | 0.02 |   | 1 |   |
| ;     |                  |      |   |   |   |
| 18712 | 190.713439941406 | 0.03 |   | 1 |   |
| ;     |                  |      |   |   |   |
| 18713 | 190.919769287109 | 0.01 |   | 1 |   |
| ;     |                  |      |   |   |   |
| 18714 | 203.019485473633 | 0.15 |   | 1 |   |
| ;     |                  |      |   |   |   |
| 18715 | 202.987365722656 | 0.01 |   | 1 |   |
| ;     |                  |      |   |   |   |
| 18716 | 202.911651611328 | 0.01 |   | 1 |   |
| ;     |                  |      |   |   |   |
| 18717 | 202.839874267578 | 0.00 |   | 1 |   |
| ;     |                  |      |   |   |   |
| 18718 | 202.663055419922 | 0.02 |   | 1 |   |
| ;     |                  |      |   |   |   |
| 18719 | 202.745498657227 | 0.06 |   | 1 |   |
| ;     |                  |      |   |   |   |
| 18720 | 202.52424621582  | 0.07 | 1 |   | ; |
| 18721 | 202.733978271484 | 0.00 |   | 1 |   |
| ;     |                  |      |   |   |   |
| 18722 | 201.500778198242 | 0.00 |   | 1 |   |
| ;     |                  |      |   |   |   |
| 18723 | 201.811752319336 | 0.00 |   | 1 |   |
| ;     |                  |      |   |   |   |
| 18724 | 199.534271240234 | 0.01 |   | 1 |   |
| ;     |                  |      |   |   |   |
| 18725 | 199.550231933594 | 0.00 |   | 1 |   |
| ;     |                  |      |   |   |   |
| 18726 | 197.467971801758 | 0.00 |   | 1 |   |
| ;     |                  |      |   |   |   |
| 18727 | 197.479598999023 | 0.07 |   | 1 |   |
| ;     |                  |      |   |   |   |
| 18728 | 209.184097290039 | 0.01 |   | 1 |   |
| ;     |                  |      |   |   |   |
| 18729 | 209.162826538086 | 0.01 |   | 1 |   |
| ;     |                  |      |   |   |   |
| 18730 | 210.136489868164 | 0.00 |   | 1 |   |
| ;     |                  |      |   |   |   |

|       |                  |      |   |   |
|-------|------------------|------|---|---|
| 18731 | 210.119995117187 | 0.00 | 1 |   |
| ;     |                  |      |   |   |
| 18732 | 202.800491333008 | 0.00 | 1 |   |
| ;     |                  |      |   |   |
| 18733 | 193.910705566406 | 0.01 | 1 |   |
| ;     |                  |      |   |   |
| 18734 | 193.906433105469 | 0.02 | 1 |   |
| ;     |                  |      |   |   |
| 18735 | 195.374771118164 | 0.06 | 1 |   |
| ;     |                  |      |   |   |
| 18736 | 195.367202758789 | 0.01 | 1 |   |
| ;     |                  |      |   |   |
| 18737 | 198.594879150391 | 0.01 | 1 |   |
| ;     |                  |      |   |   |
| 18738 | 198.583557128906 | 0.05 | 1 |   |
| ;     |                  |      |   |   |
| 18739 | 197.15788269043  | 0.01 | 1 | ; |
| 18740 | 197.141677856445 | 0.00 | 1 |   |
| ;     |                  |      |   |   |
| 18741 | 200.941162109375 | 0.02 | 1 |   |
| ;     |                  |      |   |   |
| 18742 | 200.949157714844 | 0.04 | 1 |   |
| ;     |                  |      |   |   |
| 18743 | 196.03645324707  | 0.03 | 1 | ; |
| 18744 | 196.409652709961 | 0.00 | 1 |   |
| ;     |                  |      |   |   |
| 18745 | 196.410751342773 | 0.04 | 1 |   |
| ;     |                  |      |   |   |
| 18746 | 196.776580810547 | 0.03 | 1 |   |
| ;     |                  |      |   |   |
| 18747 | 196.784591674805 | 0.07 | 1 |   |
| ;     |                  |      |   |   |
| 18748 | 203.833587646484 | 0.04 | 1 |   |
| ;     |                  |      |   |   |
| 18749 | 204.354904174805 | 0.05 | 1 |   |
| ;     |                  |      |   |   |
| 18750 | 205.224853515625 | 0.11 | 1 |   |
| ;     |                  |      |   |   |
| 18751 | 205              | 0.04 | 1 | ; |
| 18752 | 205.454620361328 | 0.10 | 1 |   |
| ;     |                  |      |   |   |
| 18753 | 205              | 0.05 | 1 | ; |
| 18754 | 205.016143798828 | 0.05 | 1 |   |
| ;     |                  |      |   |   |
| 18755 | 205              | 0.01 | 1 | ; |
| 18756 | 205              | 0.04 | 1 | ; |
| 18757 | 205              | 0.02 | 1 | ; |
| 18758 | 205.902282714844 | 0.04 | 1 |   |
| ;     |                  |      |   |   |
| 18759 | 206.098937988281 | 0.04 | 1 |   |

|       |                  |      |   |   |   |
|-------|------------------|------|---|---|---|
| ;     |                  |      |   |   |   |
| 18760 | 227.067596435547 | 0.00 |   | 1 |   |
| ;     |                  |      |   |   |   |
| 18761 | 227.300048828125 | 0.02 |   | 1 |   |
| ;     |                  |      |   |   |   |
| 18762 | 209.248382568359 | 0.01 |   | 1 |   |
| ;     |                  |      |   |   |   |
| 18763 | 209.27522277832  | 0.04 | 1 |   | ; |
| 18764 | 225.404861450195 | 0.07 |   | 1 |   |
| ;     |                  |      |   |   |   |
| 18765 | 225.513214111328 | 0.01 |   | 1 |   |
| ;     |                  |      |   |   |   |
| 18766 | 207.294799804688 | 0.03 |   | 1 |   |
| ;     |                  |      |   |   |   |
| 18767 | 206.746871948242 | 0.03 |   | 1 |   |
| ;     |                  |      |   |   |   |
| 18768 | 205.742797851563 | 0.02 |   | 1 |   |
| ;     |                  |      |   |   |   |
| 18769 | 205              | 0.01 | 1 |   | ; |
| 18770 | 204.903228759766 | 0.01 |   | 1 |   |
| ;     |                  |      |   |   |   |
| 18771 | 205              | 0.02 | 1 |   | ; |
| 18772 | 205              | 0.02 | 1 |   | ; |
| 18773 | 199.689483642578 | 0.03 |   | 1 |   |
| ;     |                  |      |   |   |   |
| 18774 | 199.623748779297 | 0.00 |   | 1 |   |
| ;     |                  |      |   |   |   |
| 18775 | 199.908340454102 | 0.01 |   | 1 |   |
| ;     |                  |      |   |   |   |
| 18776 | 199.831329345703 | 0.00 |   | 1 |   |
| ;     |                  |      |   |   |   |
| 18777 | 200.072769165039 | 0.00 |   | 1 |   |
| ;     |                  |      |   |   |   |
| 18778 | 199.914245605469 | 0.01 |   | 1 |   |
| ;     |                  |      |   |   |   |
| 18779 | 200.244476318359 | 0.04 |   | 1 |   |
| ;     |                  |      |   |   |   |
| 18780 | 199.60954284668  | 0.03 | 1 |   | ; |
| 18781 | 200.158538818359 | 0.06 |   | 1 |   |
| ;     |                  |      |   |   |   |
| 18782 | 210.16926574707  | 0.00 | 1 |   | ; |
| 18783 | 210.140548706055 | 0.03 |   | 1 |   |
| ;     |                  |      |   |   |   |
| 18784 | 199.398208618164 | 0.01 |   | 1 |   |
| ;     |                  |      |   |   |   |
| 18785 | 199.434112548828 | 0.01 |   | 1 |   |
| ;     |                  |      |   |   |   |
| 18786 | 207.872177124023 | 0.03 |   | 1 |   |
| ;     |                  |      |   |   |   |
| 18787 | 208.085021972656 | 0.01 |   | 1 |   |

|       |                  |      |   |   |   |
|-------|------------------|------|---|---|---|
| ;     |                  |      |   |   |   |
| 18788 | 209.064239501953 | 0.09 |   | 1 |   |
| ;     |                  |      |   |   |   |
| 18789 | 209.248931884766 | 0.08 |   | 1 |   |
| ;     |                  |      |   |   |   |
| 18790 | 193.599258422852 | 0.01 |   | 1 |   |
| ;     |                  |      |   |   |   |
| 18791 | 193.822784423828 | 0.03 |   | 1 |   |
| ;     |                  |      |   |   |   |
| 18792 | 193.934631347656 | 0.02 |   | 1 |   |
| ;     |                  |      |   |   |   |
| 18793 | 193.807556152344 | 0.01 |   | 1 |   |
| ;     |                  |      |   |   |   |
| 18794 | 193.205261230469 | 0.01 |   | 1 |   |
| ;     |                  |      |   |   |   |
| 18795 | 193.920166015625 | 0.02 |   | 1 |   |
| ;     |                  |      |   |   |   |
| 18796 | 193.400024414063 | 0.02 |   | 1 |   |
| ;     |                  |      |   |   |   |
| 18797 | 194.044372558594 | 0.01 |   | 1 |   |
| ;     |                  |      |   |   |   |
| 18798 | 205              | 0.00 | 1 |   | ; |
| 18799 | 205              | 0.01 | 1 |   | ; |
| 18800 | 197.802825927734 | 0.07 |   | 1 |   |
| ;     |                  |      |   |   |   |
| 18801 | 196.163009643555 | 0.08 |   | 1 |   |
| ;     |                  |      |   |   |   |
| 18802 | 194.587799072266 | 0.03 |   | 1 |   |
| ;     |                  |      |   |   |   |
| 18803 | 194.122222900391 | 0.03 |   | 1 |   |
| ;     |                  |      |   |   |   |
| 18804 | 194.232421875    | 0.01 | 1 |   | ; |
| 18805 | 193.957275390625 | 0.01 |   | 1 |   |
| ;     |                  |      |   |   |   |
| 18806 | 194.252655029297 | 0.02 |   | 1 |   |
| ;     |                  |      |   |   |   |
| 18807 | 193.952514648438 | 0.02 |   | 1 |   |
| ;     |                  |      |   |   |   |
| 18808 | 195              | 0.01 | 1 |   | ; |
| 18809 | 195.039611816406 | 0.00 |   | 1 |   |
| ;     |                  |      |   |   |   |
| 18810 | 195.309036254883 | 0.01 |   | 1 |   |
| ;     |                  |      |   |   |   |
| 18811 | 199.394058227539 | 0.01 |   | 1 |   |
| ;     |                  |      |   |   |   |
| 18812 | 199.232421875    | 0.00 | 1 |   | ; |
| 18813 | 199.048919677734 | 0.04 |   | 1 |   |
| ;     |                  |      |   |   |   |
| 18814 | 199.221008300781 | 0.04 |   | 1 |   |
| ;     |                  |      |   |   |   |

|       |                  |      |   |   |
|-------|------------------|------|---|---|
| 18815 | 199.507369995117 | 0.02 | 1 |   |
| ;     |                  |      |   |   |
| 18816 | 199.210815429688 | 0.02 | 1 |   |
| ;     |                  |      |   |   |
| 18817 | 199.443145751953 | 0.02 | 1 |   |
| ;     |                  |      |   |   |
| 18818 | 199.147155761719 | 0.02 | 1 |   |
| ;     |                  |      |   |   |
| 18820 | 205              | 0.04 | 1 | ; |
| 18821 | 205              | 0.04 | 1 | ; |
| 18822 | 206.3212890625   | 0.03 | 1 | ; |
| 18823 | 206.256195068359 | 0.05 | 1 |   |
| ;     |                  |      |   |   |
| 18824 | 199.990295410156 | 0.02 | 1 |   |
| ;     |                  |      |   |   |
| 18825 | 195.724624633789 | 0.03 | 1 |   |
| ;     |                  |      |   |   |
| 18826 | 195.333465576172 | 0.00 | 1 |   |
| ;     |                  |      |   |   |
| 18827 | 195.372680664063 | 0.00 | 1 |   |
| ;     |                  |      |   |   |
| 18828 | 196.935165405273 | 0.03 | 1 |   |
| ;     |                  |      |   |   |
| 18829 | 199.190353393555 | 0.00 | 1 |   |
| ;     |                  |      |   |   |
| 18830 | 199.182510375977 | 0.00 | 1 |   |
| ;     |                  |      |   |   |
| 18831 | 199.174652099609 | 0.01 | 1 |   |
| ;     |                  |      |   |   |
| 18832 | 199.309371948242 | 0.09 | 1 |   |
| ;     |                  |      |   |   |
| 18833 | 199.319808959961 | 0.01 | 1 |   |
| ;     |                  |      |   |   |
| 18834 | 227.62336730957  | 0.00 | 1 | ; |
| 18835 | 227.606674194336 | 0.00 | 1 |   |
| ;     |                  |      |   |   |
| 18836 | 216.6904296875   | 0.01 | 1 | ; |
| 18837 | 216.672409057617 | 0.03 | 1 |   |
| ;     |                  |      |   |   |
| 18838 | 213.638732910156 | 0.05 | 1 |   |
| ;     |                  |      |   |   |
| 18839 | 213.653213500977 | 0.04 | 1 |   |
| ;     |                  |      |   |   |
| 18840 | 212.977478027344 | 0.03 | 1 |   |
| ;     |                  |      |   |   |
| 18841 | 212.966705322266 | 0.01 | 1 |   |
| ;     |                  |      |   |   |
| 18842 | 212.988723754883 | 0.01 | 1 |   |
| ;     |                  |      |   |   |
| 18843 | 205              | 0.02 | 1 | ; |

|       |                  |      |   |   |  |   |
|-------|------------------|------|---|---|--|---|
| 18844 | 205              | 0.02 | 1 |   |  | ; |
| 18845 | 205              | 0.01 | 1 |   |  | ; |
| 18846 | 204.958404541016 | 0.01 |   | 1 |  |   |
| ;     |                  |      |   |   |  |   |
| 18847 | 204.861755371094 | 0.02 |   | 1 |  |   |
| ;     |                  |      |   |   |  |   |
| 18848 | 205              | 0.01 | 1 |   |  | ; |
| 18849 | 232.799240112305 | 0.01 |   | 1 |  |   |
| ;     |                  |      |   |   |  |   |
| 18850 | 232.8017578125   | 0.00 | 1 |   |  | ; |
| 18851 | 200              | 0.04 | 1 |   |  | ; |
| 18852 | 200              | 0.02 | 1 |   |  | ; |
| 18853 | 206.964630126953 | 0.00 |   | 1 |  |   |
| ;     |                  |      |   |   |  |   |
| 18854 | 206.981826782227 | 0.00 |   | 1 |  |   |
| ;     |                  |      |   |   |  |   |
| 18855 | 206.953887939453 | 0.03 |   | 1 |  |   |
| ;     |                  |      |   |   |  |   |
| 18856 | 194.381927490234 | 0.00 |   | 1 |  |   |
| ;     |                  |      |   |   |  |   |
| 18857 | 194.394668579102 | 0.01 |   | 1 |  |   |
| ;     |                  |      |   |   |  |   |
| 18858 | 201.21028137207  | 0.03 | 1 |   |  | ; |
| 18859 | 201.198104858398 | 0.01 |   | 1 |  |   |
| ;     |                  |      |   |   |  |   |
| 18860 | 202.757308959961 | 0.04 |   | 1 |  |   |
| ;     |                  |      |   |   |  |   |
| 18861 | 202.758499145508 | 0.00 |   | 1 |  |   |
| ;     |                  |      |   |   |  |   |
| 18862 | 205.474853515625 | 0.00 |   | 1 |  |   |
| ;     |                  |      |   |   |  |   |
| 18863 | 205.498596191406 | 0.00 |   | 1 |  |   |
| ;     |                  |      |   |   |  |   |
| 18864 | 205              | 0.00 | 1 |   |  | ; |
| 18865 | 213.910232543945 | 0.03 |   | 1 |  |   |
| ;     |                  |      |   |   |  |   |
| 18866 | 214.654922485352 | 0.03 |   | 1 |  |   |
| ;     |                  |      |   |   |  |   |
| 18867 | 211.414337158203 | 0.01 |   | 1 |  |   |
| ;     |                  |      |   |   |  |   |
| 18868 | 211.361114501953 | 0.00 |   | 1 |  |   |
| ;     |                  |      |   |   |  |   |
| 18869 | 212.382949829102 | 0.03 |   | 1 |  |   |
| ;     |                  |      |   |   |  |   |
| 18870 | 212.915985107422 | 0.03 |   | 1 |  |   |
| ;     |                  |      |   |   |  |   |
| 18871 | 212.096527099609 | 0.01 |   | 1 |  |   |
| ;     |                  |      |   |   |  |   |
| 18872 | 211.724533081055 | 0.09 |   | 1 |  |   |
| ;     |                  |      |   |   |  |   |

|       |                  |      |   |   |
|-------|------------------|------|---|---|
| 18873 | 207.222030639648 | 0.01 | 1 |   |
| ;     |                  |      |   |   |
| 18874 | 207.097564697266 | 0.04 | 1 |   |
| ;     |                  |      |   |   |
| 18875 | 200.25749206543  | 0.01 | 1 | ; |
| 18876 | 200.139801025391 | 0.02 | 1 |   |
| ;     |                  |      |   |   |
| 18877 | 197.290176391602 | 0.04 | 1 |   |
| ;     |                  |      |   |   |
| 18878 | 197.783996582031 | 0.04 | 1 |   |
| ;     |                  |      |   |   |
| 18879 | 197.177459716797 | 0.00 | 1 |   |
| ;     |                  |      |   |   |
| 18880 | 199.400543212891 | 0.11 | 1 |   |
| ;     |                  |      |   |   |
| 18881 | 196.404678344727 | 0.11 | 1 |   |
| ;     |                  |      |   |   |
| 18882 | 194.777679443359 | 0.02 | 1 |   |
| ;     |                  |      |   |   |
| 18883 | 194.990661621094 | 0.02 | 1 |   |
| ;     |                  |      |   |   |
| 18884 | 195.525955200195 | 0.02 | 1 |   |
| ;     |                  |      |   |   |
| 18885 | 195.425567626953 | 0.01 | 1 |   |
| ;     |                  |      |   |   |
| 18886 | 198.211853027344 | 0.01 | 1 |   |
| ;     |                  |      |   |   |
| 18887 | 206.711990356445 | 0.01 | 1 |   |
| ;     |                  |      |   |   |
| 18888 | 206.86799621582  | 0.01 | 1 | ; |
| 18889 | 207.22785949707  | 0.02 | 1 | ; |
| 18890 | 198.999786376953 | 0.01 | 1 |   |
| ;     |                  |      |   |   |
| 18891 | 199.216247558594 | 0.00 | 1 |   |
| ;     |                  |      |   |   |
| 18892 | 230.547988891602 | 0.00 | 1 |   |
| ;     |                  |      |   |   |
| 18893 | 230.567779541016 | 0.02 | 1 |   |
| ;     |                  |      |   |   |
| 18894 | 230.244201660156 | 0.00 | 1 |   |
| ;     |                  |      |   |   |
| 18895 | 230.262588500977 | 0.00 | 1 |   |
| ;     |                  |      |   |   |
| 18896 | 208.243057250977 | 0.02 | 1 |   |
| ;     |                  |      |   |   |
| 18897 | 208.233184814453 | 0.01 | 1 |   |
| ;     |                  |      |   |   |
| 18898 | 208.564743041992 | 0.03 | 1 |   |
| ;     |                  |      |   |   |
| 18899 | 208.572250366211 | 0.00 | 1 |   |



|       |                  |      |   |   |   |
|-------|------------------|------|---|---|---|
| ;     |                  |      |   |   |   |
| 18900 | 208.554641723633 | 0.00 |   | 1 |   |
| ;     |                  |      |   |   |   |
| 18901 | 208.222137451172 | 0.04 |   | 1 |   |
| ;     |                  |      |   |   |   |
| 18902 | 208.204391479492 | 0.02 |   | 1 |   |
| ;     |                  |      |   |   |   |
| 18903 | 208.234283447266 | 0.02 |   | 1 |   |
| ;     |                  |      |   |   |   |
| 18904 | 208.243179321289 | 0.00 |   | 1 |   |
| ;     |                  |      |   |   |   |
| 18905 | 202.16064453125  | 0.09 | 1 |   | ; |
| 18906 | 201.220550537109 | 0.05 |   | 1 |   |
| ;     |                  |      |   |   |   |
| 18907 | 200.045989990234 | 0.06 |   | 1 |   |
| ;     |                  |      |   |   |   |
| 18908 | 201.082473754883 | 0.07 |   | 1 |   |
| ;     |                  |      |   |   |   |
| 18909 | 198.771102905273 | 0.03 |   | 1 |   |
| ;     |                  |      |   |   |   |
| 18910 | 199.215911865234 | 0.03 |   | 1 |   |
| ;     |                  |      |   |   |   |
| 18911 | 198.736938476563 | 0.00 |   | 1 |   |
| ;     |                  |      |   |   |   |
| 18912 | 198.394653320313 | 0.01 |   | 1 |   |
| ;     |                  |      |   |   |   |
| 18913 | 207.261871337891 | 0.01 |   | 1 |   |
| ;     |                  |      |   |   |   |
| 18914 | 207.064041137695 | 0.01 |   | 1 |   |
| ;     |                  |      |   |   |   |
| 18915 | 207.011184692383 | 0.00 |   | 1 |   |
| ;     |                  |      |   |   |   |
| 18916 | 206.04035949707  | 0.04 | 1 |   | ; |
| 18917 | 206.063995361328 | 0.00 |   | 1 |   |
| ;     |                  |      |   |   |   |
| 18918 | 207.506607055664 | 0.07 |   | 1 |   |
| ;     |                  |      |   |   |   |
| 18919 | 208.050827026367 | 0.02 |   | 1 |   |
| ;     |                  |      |   |   |   |
| 18920 | 207.465057373047 | 0.04 |   | 1 |   |
| ;     |                  |      |   |   |   |
| 18921 | 207.497741699219 | 0.00 |   | 1 |   |
| ;     |                  |      |   |   |   |
| 18922 | 203.174179077148 | 0.01 |   | 1 |   |
| ;     |                  |      |   |   |   |
| 18923 | 204.963043212891 | 0.02 |   | 1 |   |
| ;     |                  |      |   |   |   |
| 18924 | 194.213165283203 | 0.07 |   | 1 |   |
| ;     |                  |      |   |   |   |
| 18925 | 194.49235534668  | 0.04 | 1 |   | ; |

|       |                  |      |   |   |
|-------|------------------|------|---|---|
| 18926 | 193.933746337891 | 0.07 | 1 |   |
| ;     |                  |      |   |   |
| 18927 | 193.691543579102 | 0.02 | 1 |   |
| ;     |                  |      |   |   |
| 18928 | 193.743026733398 | 0.04 | 1 |   |
| ;     |                  |      |   |   |
| 18929 | 193.861541748047 | 0.00 | 1 |   |
| ;     |                  |      |   |   |
| 18930 | 235.305923461914 | 0.00 | 1 |   |
| ;     |                  |      |   |   |
| 18931 | 235.476043701172 | 0.00 | 1 |   |
| ;     |                  |      |   |   |
| 18932 | 214.713821411133 | 0.00 | 1 |   |
| ;     |                  |      |   |   |
| 18933 | 214.671783447266 | 0.00 | 1 |   |
| ;     |                  |      |   |   |
| 18934 | 204.389450073242 | 0.03 | 1 |   |
| ;     |                  |      |   |   |
| 18935 | 203.872894287109 | 0.01 | 1 |   |
| ;     |                  |      |   |   |
| 18936 | 203.715728759766 | 0.00 | 1 |   |
| ;     |                  |      |   |   |
| 18937 | 231.021606445313 | 0.01 | 1 |   |
| ;     |                  |      |   |   |
| 18938 | 230.85563659668  | 0.00 | 1 |   |
| 18939 | 231.635452270508 | 0.00 | 1 | ; |
| ;     |                  |      |   |   |
| 18940 | 231.410537719727 | 0.00 | 1 |   |
| ;     |                  |      |   |   |
| 18941 | 202.193176269531 | 0.01 | 1 |   |
| ;     |                  |      |   |   |
| 18942 | 202.728408813477 | 0.03 | 1 |   |
| ;     |                  |      |   |   |
| 18943 | 202.043197631836 | 0.01 | 1 |   |
| ;     |                  |      |   |   |
| 18944 | 201.603393554688 | 0.01 | 1 |   |
| ;     |                  |      |   |   |
| 18945 | 202.062744140625 | 0.02 | 1 |   |
| ;     |                  |      |   |   |
| 18946 | 202.173355102539 | 0.02 | 1 |   |
| ;     |                  |      |   |   |
| 18947 | 201.8837890625   | 0.01 | 1 |   |
| 18948 | 202.456756591797 | 0.01 | 1 | ; |
| ;     |                  |      |   |   |
| 18949 | 228.336639404297 | 0.03 | 1 |   |
| ;     |                  |      |   |   |
| 18950 | 228.904357910156 | 0.02 | 1 |   |
| ;     |                  |      |   |   |
| 18951 | 228.5888671875   | 0.03 | 1 |   |
| 18952 | 229.204574584961 | 0.06 | 1 | ; |

|       |                      |      |   |   |   |
|-------|----------------------|------|---|---|---|
| ;     |                      |      |   |   |   |
| 18953 | 228.959747314453     | 0.01 |   | 1 |   |
| ;     |                      |      |   |   |   |
| 18954 | 228.640090942383     | 0.01 |   | 1 |   |
| ;     |                      |      |   |   |   |
| 18955 | 229.254959106445     | 0.07 |   | 1 |   |
| ;     |                      |      |   |   |   |
| 18956 | 221.547149658203     | 0.04 |   | 1 |   |
| ;     |                      |      |   |   |   |
| 18957 | 221.756362915039     | 0.01 |   | 1 |   |
| ;     |                      |      |   |   |   |
| 18958 | 220.855407714844     | 0.01 |   | 1 |   |
| ;     |                      |      |   |   |   |
| 18959 | 221.305206298828     | 0.03 |   | 1 |   |
| ;     |                      |      |   |   |   |
| 18960 | 220.779830932617     | 0.01 |   | 1 |   |
| ;     |                      |      |   |   |   |
| 18961 | 206.09228515625 0.20 |      | 1 |   | ; |
| 18962 | 206.102798461914     | 0.05 |   | 1 |   |
| ;     |                      |      |   |   |   |
| 18963 | 206.08219909668 0.00 |      | 1 |   | ; |
| 18964 | 205.708724975586     | 0.01 |   | 1 |   |
| ;     |                      |      |   |   |   |
| 18965 | 205.695159912109     | 0.01 |   | 1 |   |
| ;     |                      |      |   |   |   |
| 18966 | 203.19758605957 0.00 |      | 1 |   | ; |
| 18967 | 203.202774047852     | 0.03 |   | 1 |   |
| ;     |                      |      |   |   |   |
| 18968 | 203.219909667969     | 0.00 |   | 1 |   |
| ;     |                      |      |   |   |   |
| 18969 | 203.526458740234     | 0.00 |   | 1 |   |
| ;     |                      |      |   |   |   |
| 18970 | 203.526123046875     | 0.00 |   | 1 |   |
| ;     |                      |      |   |   |   |
| 18971 | 203.526809692383     | 0.00 |   | 1 |   |
| ;     |                      |      |   |   |   |
| 18972 | 203.545974731445     | 0.01 |   | 1 |   |
| ;     |                      |      |   |   |   |
| 18973 | 203.549133300781     | 0.01 |   | 1 |   |
| ;     |                      |      |   |   |   |
| 18974 | 203.523254394531     | 0.00 |   | 1 |   |
| ;     |                      |      |   |   |   |
| 18975 | 202.647125244141     | 0.02 |   | 1 |   |
| ;     |                      |      |   |   |   |
| 18976 | 202.655517578125     | 0.01 |   | 1 |   |
| ;     |                      |      |   |   |   |
| 18977 | 202.63818359375 0.01 |      | 1 |   | ; |
| 18978 | 213.364105224609     | 0.01 |   | 1 |   |
| ;     |                      |      |   |   |   |
| 18979 | 213.354354858398     | 0.07 |   | 1 |   |

|       |                  |      |   |   |   |
|-------|------------------|------|---|---|---|
| ;     |                  |      |   |   |   |
| 18980 | 214.78857421875  | 0.04 | 1 |   | ; |
| 18981 | 214.803665161133 | 0.02 |   | 1 |   |
| ;     |                  |      |   |   |   |
| 18982 | 213.695831298828 | 0.05 |   | 1 |   |
| ;     |                  |      |   |   |   |
| 18983 | 213.701309204102 | 0.02 |   | 1 |   |
| ;     |                  |      |   |   |   |
| 18984 | 212.953628540039 | 0.00 |   | 1 |   |
| ;     |                  |      |   |   |   |
| 18985 | 212.961807250977 | 0.01 |   | 1 |   |
| ;     |                  |      |   |   |   |
| 18986 | 229.063888549805 | 0.02 |   | 1 |   |
| ;     |                  |      |   |   |   |
| 18987 | 229.054336547852 | 0.03 |   | 1 |   |
| ;     |                  |      |   |   |   |
| 18988 | 218.420150756836 | 0.01 |   | 1 |   |
| ;     |                  |      |   |   |   |
| 18989 | 218.430145263672 | 0.01 |   | 1 |   |
| ;     |                  |      |   |   |   |
| 18990 | 218.14501953125  | 0.01 | 1 |   | ; |
| 18991 | 218.153610229492 | 0.01 |   | 1 |   |
| ;     |                  |      |   |   |   |
| 18992 | 217.844329833984 | 0.02 |   | 1 |   |
| ;     |                  |      |   |   |   |
| 18993 | 217.849075317383 | 0.01 |   | 1 |   |
| ;     |                  |      |   |   |   |
| 18994 | 201.283309936523 | 0.00 |   | 1 |   |
| ;     |                  |      |   |   |   |
| 18995 | 201.311569213867 | 0.00 |   | 1 |   |
| ;     |                  |      |   |   |   |
| 18996 | 201.25505065918  | 0.05 | 1 |   | ; |
| 18997 | 203.179824829102 | 0.01 |   | 1 |   |
| ;     |                  |      |   |   |   |
| 18998 | 203.165893554688 | 0.01 |   | 1 |   |
| ;     |                  |      |   |   |   |
| 18999 | 203.156814575195 | 0.00 |   | 1 |   |
| ;     |                  |      |   |   |   |
| 19000 | 203.145355224609 | 0.01 |   | 1 |   |
| ;     |                  |      |   |   |   |
| 19001 | 227.13623046875  | 0.01 | 1 |   | ; |
| 19002 | 227.119674682617 | 0.01 |   | 1 |   |
| ;     |                  |      |   |   |   |
| 19003 | 227.478012084961 | 0.00 |   | 1 |   |
| ;     |                  |      |   |   |   |
| 19004 | 227.464660644531 | 0.01 |   | 1 |   |
| ;     |                  |      |   |   |   |
| 19005 | 223.364761352539 | 0.03 |   | 1 |   |
| ;     |                  |      |   |   |   |
| 19006 | 223.343551635742 | 0.04 |   | 1 |   |

|       |                  |      |   |   |   |
|-------|------------------|------|---|---|---|
| ;     |                  |      |   |   |   |
| 19007 | 225.863250732422 | 0.00 |   | 1 |   |
| ;     |                  |      |   |   |   |
| 19008 | 225.847152709961 | 0.00 |   | 1 |   |
| ;     |                  |      |   |   |   |
| 19009 | 225.879348754883 | 0.00 |   | 1 |   |
| ;     |                  |      |   |   |   |
| 19010 | 227.787796020508 | 0.01 |   | 1 |   |
| ;     |                  |      |   |   |   |
| 19011 | 227.806701660156 | 0.00 |   | 1 |   |
| ;     |                  |      |   |   |   |
| 19012 | 227.371780395508 | 0.01 |   | 1 |   |
| ;     |                  |      |   |   |   |
| 19013 | 227.361999511719 | 0.05 |   | 1 |   |
| ;     |                  |      |   |   |   |
| 19014 | 227.999450683594 | 0.05 |   | 1 |   |
| ;     |                  |      |   |   |   |
| 19015 | 228.012313842773 | 0.02 |   | 1 |   |
| ;     |                  |      |   |   |   |
| 19016 | 228.255355834961 | 0.01 |   | 1 |   |
| ;     |                  |      |   |   |   |
| 19017 | 228.266708374023 | 0.05 |   | 1 |   |
| ;     |                  |      |   |   |   |
| 19018 | 208.647064208984 | 0.00 |   | 1 |   |
| ;     |                  |      |   |   |   |
| 19019 | 208.64599609375  | 0.01 | 1 |   | ; |
| 19020 | 204.44384765625  | 0.22 | 1 |   | ; |
| 19021 | 204.452972412109 | 0.05 |   | 1 |   |
| ;     |                  |      |   |   |   |
| 19022 | 205.967132568359 | 0.00 |   | 1 |   |
| ;     |                  |      |   |   |   |
| 19023 | 205.969329833984 | 0.01 |   | 1 |   |
| ;     |                  |      |   |   |   |
| 19024 | 227.63671875     | 0.02 | 1 |   | ; |
| 19025 | 227.627105712891 | 0.01 |   | 1 |   |
| ;     |                  |      |   |   |   |
| 19026 | 221.286743164063 | 0.02 |   | 1 |   |
| ;     |                  |      |   |   |   |
| 19027 | 206.142501831055 | 0.09 |   | 1 |   |
| ;     |                  |      |   |   |   |
| 19028 | 206.150039672852 | 0.01 |   | 1 |   |
| ;     |                  |      |   |   |   |
| 19029 | 216.431594848633 | 0.02 |   | 1 |   |
| ;     |                  |      |   |   |   |
| 19030 | 216.435394287109 | 0.05 |   | 1 |   |
| ;     |                  |      |   |   |   |
| 19031 | 215.393997192383 | 0.00 |   | 1 |   |
| ;     |                  |      |   |   |   |
| 19032 | 215.397872924805 | 0.04 |   | 1 |   |
| ;     |                  |      |   |   |   |

|       |                      |      |   |   |
|-------|----------------------|------|---|---|
| 19033 | 206.556365966797     | 0.01 | 1 |   |
| ;     |                      |      |   |   |
| 19034 | 206.545776367188     | 0.03 | 1 |   |
| ;     |                      |      |   |   |
| 19035 | 206.567169189453     | 0.02 | 1 |   |
| ;     |                      |      |   |   |
| 19036 | 207.894241333008     | 0.00 | 1 |   |
| ;     |                      |      |   |   |
| 19037 | 207.901763916016     | 0.02 | 1 |   |
| ;     |                      |      |   |   |
| 19038 | 207.886138916016     | 0.00 | 1 |   |
| ;     |                      |      |   |   |
| 19039 | 207.075622558594     | 0.06 | 1 |   |
| ;     |                      |      |   |   |
| 19040 | 202.607757568359     | 0.01 | 1 |   |
| ;     |                      |      |   |   |
| 19041 | 202.594253540039     | 0.03 | 1 |   |
| ;     |                      |      |   |   |
| 19042 | 201.908172607422     | 0.02 | 1 |   |
| ;     |                      |      |   |   |
| 19043 | 201.919235229492     | 0.03 | 1 |   |
| ;     |                      |      |   |   |
| 19044 | 202.203582763672     | 0.02 | 1 |   |
| ;     |                      |      |   |   |
| 19045 | 202.22004699707 0.03 |      | 1 | ; |
| 19046 | 203.111999511719     | 0.02 | 1 |   |
| ;     |                      |      |   |   |
| 19047 | 203.096160888672     | 0.03 | 1 |   |
| ;     |                      |      |   |   |
| 19048 | 202.243087768555     | 0.01 | 1 |   |
| ;     |                      |      |   |   |
| 19049 | 202.258926391602     | 0.01 | 1 |   |
| ;     |                      |      |   |   |
| 19050 | 203.035797119141     | 0.01 | 1 |   |
| ;     |                      |      |   |   |
| 19051 | 203.050903320313     | 0.00 | 1 |   |
| ;     |                      |      |   |   |
| 19052 | 203.07585144043 0.00 |      | 1 | ; |
| 19053 | 203.060745239258     | 0.00 | 1 |   |
| ;     |                      |      |   |   |
| 19054 | 196.830841064453     | 0.02 | 1 |   |
| ;     |                      |      |   |   |
| 19055 | 196.847137451172     | 0.05 | 1 |   |
| ;     |                      |      |   |   |
| 19056 | 198.661697387695     | 0.00 | 1 |   |
| ;     |                      |      |   |   |
| 19057 | 198.65007019043 0.06 |      | 1 | ; |
| 19058 | 196.244003295898     | 0.00 | 1 |   |
| ;     |                      |      |   |   |
| 19059 | 196.234710693359     | 0.07 | 1 |   |

|       |                  |      |   |   |
|-------|------------------|------|---|---|
| ;     |                  |      |   |   |
| 19060 | 197.075531005859 | 0.02 | 1 |   |
| ;     |                  |      |   |   |
| 19061 | 197.066040039063 | 0.01 | 1 |   |
| ;     |                  |      |   |   |
| 19062 | 197.336853027344 | 0.02 | 1 |   |
| ;     |                  |      |   |   |
| 19063 | 197.328826904297 | 0.01 | 1 |   |
| ;     |                  |      |   |   |
| 19064 | 197.140686035156 | 0.02 | 1 |   |
| ;     |                  |      |   |   |
| 19065 | 197.147857666016 | 0.01 | 1 |   |
| ;     |                  |      |   |   |
| 19066 | 196.889450073242 | 0.02 | 1 |   |
| ;     |                  |      |   |   |
| 19067 | 196.880905151367 | 0.01 | 1 |   |
| ;     |                  |      |   |   |
| 19068 | 195.324432373047 | 0.01 | 1 |   |
| ;     |                  |      |   |   |
| 19069 | 195.334045410156 | 0.03 | 1 |   |
| ;     |                  |      |   |   |
| 19070 | 195.528182983398 | 0.02 | 1 |   |
| ;     |                  |      |   |   |
| 19071 | 195.512664794922 | 0.02 | 1 |   |
| ;     |                  |      |   |   |
| 19072 | 193.83854675293  | 0.01 | 1 |   |
| 19073 | 193.833145141602 | 0.04 | 1 | ; |
| ;     |                  |      |   |   |
| 19074 | 225.794891357422 | 0.04 | 1 |   |
| ;     |                  |      |   |   |
| 19075 | 204.849487304688 | 0.01 | 1 |   |
| ;     |                  |      |   |   |
| 19076 | 205.253982543945 | 0.01 | 1 |   |
| ;     |                  |      |   |   |
| 19077 | 205.049530029297 | 0.04 | 1 |   |
| ;     |                  |      |   |   |
| 19078 | 204.660598754883 | 0.02 | 1 |   |
| ;     |                  |      |   |   |
| 19079 | 220.542053222656 | 0.01 | 1 |   |
| ;     |                  |      |   |   |
| 19080 | 220.145065307617 | 0.02 | 1 |   |
| ;     |                  |      |   |   |
| 19081 | 204.059677124023 | 0.00 | 1 |   |
| ;     |                  |      |   |   |
| 19082 | 203.650527954102 | 0.05 | 1 |   |
| ;     |                  |      |   |   |
| 19083 | 204.895492553711 | 0.01 | 1 |   |
| ;     |                  |      |   |   |
| 19084 | 205.124954223633 | 0.01 | 1 |   |
| ;     |                  |      |   |   |

|       |                  |      |   |  |
|-------|------------------|------|---|--|
| 19085 | 205.147644042969 | 0.01 | 1 |  |
| ;     |                  |      |   |  |
| 19086 | 205.456268310547 | 0.01 | 1 |  |
| ;     |                  |      |   |  |
| 19087 | 204.335235595703 | 0.02 | 1 |  |
| ;     |                  |      |   |  |
| 19088 | 204.603363037109 | 0.02 | 1 |  |
| ;     |                  |      |   |  |
| 19089 | 204.145080566406 | 0.01 | 1 |  |
| ;     |                  |      |   |  |
| 19090 | 230.753463745117 | 0.05 | 1 |  |
| ;     |                  |      |   |  |
| 19091 | 230.459609985352 | 0.01 | 1 |  |
| ;     |                  |      |   |  |
| 19092 | 203.165420532227 | 0.03 | 1 |  |
| ;     |                  |      |   |  |
| 19093 | 203.301605224609 | 0.11 | 1 |  |
| ;     |                  |      |   |  |
| 19094 | 202.620468139648 | 0.07 | 1 |  |
| ;     |                  |      |   |  |
| 19095 | 203.15803527832  | 0.03 | 1 |  |
| 19096 | 203.407135009766 | 0.00 | 1 |  |
| ;     |                  |      |   |  |
| 19097 | 203.446868896484 | 0.04 | 1 |  |
| ;     |                  |      |   |  |
| 19098 | 203.400375366211 | 0.03 | 1 |  |
| ;     |                  |      |   |  |
| 19099 | 203.589813232422 | 0.03 | 1 |  |
| ;     |                  |      |   |  |
| 19100 | 203.746505737305 | 0.07 | 1 |  |
| ;     |                  |      |   |  |
| 19101 | 203.841445922852 | 0.03 | 1 |  |
| ;     |                  |      |   |  |
| 19102 | 203.096893310547 | 0.01 | 1 |  |
| ;     |                  |      |   |  |
| 19103 | 203.150680541992 | 0.01 | 1 |  |
| ;     |                  |      |   |  |
| 19104 | 203.124771118164 | 0.09 | 1 |  |
| ;     |                  |      |   |  |
| 19105 | 203.086837768555 | 0.01 | 1 |  |
| ;     |                  |      |   |  |
| 19106 | 203.091613769531 | 0.00 | 1 |  |
| ;     |                  |      |   |  |
| 19107 | 203.040985107422 | 0.04 | 1 |  |
| ;     |                  |      |   |  |
| 19108 | 203.098129272461 | 0.03 | 1 |  |
| ;     |                  |      |   |  |
| 19109 | 203.0810546875   | 0.03 | 1 |  |
| 19110 | 202.324478149414 | 0.07 | 1 |  |
| ;     |                  |      |   |  |



|       |                  |      |   |   |
|-------|------------------|------|---|---|
| 19111 | 204.090759277344 | 0.07 | 1 |   |
| ;     |                  |      |   |   |
| 19112 | 203.075454711914 | 0.04 | 1 |   |
| ;     |                  |      |   |   |
| 19113 | 219.655532836914 | 0.01 | 1 |   |
| ;     |                  |      |   |   |
| 19114 | 219.862258911133 | 0.02 | 1 |   |
| ;     |                  |      |   |   |
| 19115 | 219.663040161133 | 0.01 | 1 |   |
| ;     |                  |      |   |   |
| 19116 | 219.531188964844 | 0.00 | 1 |   |
| ;     |                  |      |   |   |
| 19117 | 226.822174072266 | 0.04 | 1 |   |
| ;     |                  |      |   |   |
| 19118 | 224.823043823242 | 0.05 | 1 |   |
| ;     |                  |      |   |   |
| 19119 | 215              | 0.02 | 1 | ; |
| 19120 | 215.104904174805 | 0.02 | 1 |   |
| ;     |                  |      |   |   |
| 19121 | 205.323455810547 | 0.00 | 1 |   |
| ;     |                  |      |   |   |
| 19122 | 205.979537963867 | 0.13 | 1 |   |
| ;     |                  |      |   |   |
| 19123 | 201.730514526367 | 0.05 | 1 |   |
| ;     |                  |      |   |   |
| 19124 | 200.71159362793  | 0.03 | 1 | ; |
| 19125 | 221.678512573242 | 0.04 | 1 |   |
| ;     |                  |      |   |   |
| 19126 | 221.256698608398 | 0.04 | 1 |   |
| ;     |                  |      |   |   |
| 19127 | 202.510498046875 | 0.03 | 1 |   |
| ;     |                  |      |   |   |
| 19128 | 202.75715637207  | 0.02 | 1 | ; |
| 19129 | 204.185974121094 | 0.01 | 1 |   |
| ;     |                  |      |   |   |
| 19130 | 203.89192199707  | 0.01 | 1 | ; |
| 19131 | 231.060882568359 | 0.01 | 1 |   |
| ;     |                  |      |   |   |
| 19132 | 222.442260742187 | 0.03 | 1 |   |
| ;     |                  |      |   |   |
| 19133 | 222.817337036133 | 0.01 | 1 |   |
| ;     |                  |      |   |   |
| 19134 | 202.409072875977 | 0.03 | 1 |   |
| ;     |                  |      |   |   |
| 19135 | 222.440536499023 | 0.02 | 1 |   |
| ;     |                  |      |   |   |
| 19136 | 222.178588867187 | 0.01 | 1 |   |
| ;     |                  |      |   |   |
| 19137 | 222.091171264648 | 0.03 | 1 |   |
| ;     |                  |      |   |   |

|       |                      |      |   |   |   |
|-------|----------------------|------|---|---|---|
| 19138 | 221.826217651367     | 0.03 |   | 1 |   |
| ;     |                      |      |   |   |   |
| 19139 | 221.93830871582 0.00 |      | 1 |   | ; |
| 19140 | 222.398208618164     | 0.01 |   | 1 |   |
| ;     |                      |      |   |   |   |
| 19141 | 200 0.01             |      | 1 |   | ; |
| 19142 | 200.030136108398     | 0.01 |   | 1 |   |
| ;     |                      |      |   |   |   |
| 19143 | 228.235122680664     | 0.01 |   | 1 |   |
| ;     |                      |      |   |   |   |
| 19144 | 235.651031494141     | 0.02 |   | 1 |   |
| ;     |                      |      |   |   |   |
| 19145 | 235.762802124023     | 0.07 |   | 1 |   |
| ;     |                      |      |   |   |   |
| 19146 | 203.354827880859     | 0.01 |   | 1 |   |
| ;     |                      |      |   |   |   |
| 19147 | 203.144241333008     | 0.01 |   | 1 |   |
| ;     |                      |      |   |   |   |
| 19148 | 202.839874267578     | 0.01 |   | 1 |   |
| ;     |                      |      |   |   |   |
| 19149 | 202.816390991211     | 0.01 |   | 1 |   |
| ;     |                      |      |   |   |   |
| 19150 | 202.505340576172     | 0.01 |   | 1 |   |
| ;     |                      |      |   |   |   |
| 19151 | 202.511215209961     | 0.01 |   | 1 |   |
| ;     |                      |      |   |   |   |
| 19152 | 204.739410400391     | 0.01 |   | 1 |   |
| ;     |                      |      |   |   |   |
| 19153 | 203.927749633789     | 0.01 |   | 1 |   |
| ;     |                      |      |   |   |   |
| 19154 | 219.775604248047     | 0.03 |   | 1 |   |
| ;     |                      |      |   |   |   |
| 19155 | 220.103713989258     | 0.05 |   | 1 |   |
| ;     |                      |      |   |   |   |
| 19156 | 219.902145385742     | 0.01 |   | 1 |   |
| ;     |                      |      |   |   |   |
| 19157 | 225.770874023438     | 0.03 |   | 1 |   |
| ;     |                      |      |   |   |   |
| 19158 | 225.704559326172     | 0.00 |   | 1 |   |
| ;     |                      |      |   |   |   |
| 19159 | 226.96321105957 0.08 |      | 1 |   | ; |
| 19160 | 204.991271972656     | 0.03 |   | 1 |   |
| ;     |                      |      |   |   |   |
| 19161 | 205.018280029297     | 0.03 |   | 1 |   |
| ;     |                      |      |   |   |   |
| 19162 | 204.83154296875 0.02 |      | 1 |   | ; |
| 19163 | 204.59651184082 0.01 |      | 1 |   | ; |
| 19164 | 203.172103881836     | 0.02 |   | 1 |   |
| ;     |                      |      |   |   |   |
| 19165 | 203.188125610352     | 0.00 |   | 1 |   |

|       |                  |      |   |   |   |
|-------|------------------|------|---|---|---|
| ;     |                  |      |   |   |   |
| 19166 | 201.519104003906 | 0.01 |   | 1 |   |
| ;     |                  |      |   |   |   |
| 19167 | 201.299331665039 | 0.01 |   | 1 |   |
| ;     |                  |      |   |   |   |
| 19168 | 200.684295654297 | 0.01 |   | 1 |   |
| ;     |                  |      |   |   |   |
| 19169 | 200.403289794922 | 0.01 |   | 1 |   |
| ;     |                  |      |   |   |   |
| 19170 | 201.919647216797 | 0.01 |   | 1 |   |
| ;     |                  |      |   |   |   |
| 19171 | 201.69953918457  | 0.01 | 1 |   | ; |
| 19172 | 200.725280761719 | 0.06 |   | 1 |   |
| ;     |                  |      |   |   |   |
| 19173 | 202.037261962891 | 0.04 |   | 1 |   |
| ;     |                  |      |   |   |   |
| 19174 | 200.970306396484 | 0.01 |   | 1 |   |
| ;     |                  |      |   |   |   |
| 19175 | 200.224838256836 | 0.03 |   | 1 |   |
| ;     |                  |      |   |   |   |
| 19176 | 200.447006225586 | 0.03 |   | 1 |   |
| ;     |                  |      |   |   |   |
| 19177 | 200.515197753906 | 0.00 |   | 1 |   |
| ;     |                  |      |   |   |   |
| 19178 | 200              | 0.01 | 1 |   | ; |
| 19179 | 200              | 0.01 | 1 |   | ; |
| 19180 | 200              | 0.06 | 1 |   | ; |
| 19181 | 201.675170898438 | 0.00 |   | 1 |   |
| ;     |                  |      |   |   |   |
| 19182 | 202.086776733398 | 0.00 |   | 1 |   |
| ;     |                  |      |   |   |   |
| 19183 | 213.899932861328 | 0.00 |   | 1 |   |
| ;     |                  |      |   |   |   |
| 19184 | 213.771057128906 | 0.01 |   | 1 |   |
| ;     |                  |      |   |   |   |
| 19185 | 214.806762695313 | 0.05 |   | 1 |   |
| ;     |                  |      |   |   |   |
| 19186 | 214.661041259766 | 0.05 |   | 1 |   |
| ;     |                  |      |   |   |   |
| 19187 | 216.523788452148 | 0.02 |   | 1 |   |
| ;     |                  |      |   |   |   |
| 19188 | 216.53434753418  | 0.02 | 1 |   | ; |
| 19189 | 217.788314819336 | 0.01 |   | 1 |   |
| ;     |                  |      |   |   |   |
| 19190 | 217.890899658203 | 0.03 |   | 1 |   |
| ;     |                  |      |   |   |   |
| 19191 | 210.998626708984 | 0.19 |   | 1 |   |
| ;     |                  |      |   |   |   |
| 19192 | 211.624420166016 | 0.06 |   | 1 |   |
| ;     |                  |      |   |   |   |

|       |                  |      |   |   |
|-------|------------------|------|---|---|
| 19193 | 205.941192626953 | 0.01 | 1 |   |
| ;     |                  |      |   |   |
| 19194 | 205.634262084961 | 0.07 | 1 |   |
| ;     |                  |      |   |   |
| 19195 | 205.517700195313 | 0.02 | 1 |   |
| ;     |                  |      |   |   |
| 19196 | 205.172439575195 | 0.09 | 1 |   |
| ;     |                  |      |   |   |
| 19197 | 210.534805297852 | 0.01 | 1 |   |
| ;     |                  |      |   |   |
| 19198 | 210.673828125    | 0.01 | 1 |   |
| 19199 | 201.692596435547 | 0.04 | 1 | ; |
| ;     |                  |      |   |   |
| 19200 | 201.699340820313 | 0.00 | 1 |   |
| ;     |                  |      |   |   |
| 19201 | 227.062347412109 | 0.01 | 1 |   |
| ;     |                  |      |   |   |
| 19202 | 198.331695556641 | 0.04 | 1 |   |
| ;     |                  |      |   |   |
| 19203 | 198.348999023438 | 0.02 | 1 |   |
| ;     |                  |      |   |   |
| 19204 | 198.317001342773 | 0.03 | 1 |   |
| ;     |                  |      |   |   |
| 19205 | 198.333450317383 | 0.03 | 1 |   |
| ;     |                  |      |   |   |
| 19206 | 198.753570556641 | 0.02 | 1 |   |
| ;     |                  |      |   |   |
| 19207 | 199.826095581055 | 0.03 | 1 |   |
| ;     |                  |      |   |   |
| 19208 | 199.810455322266 | 0.02 | 1 |   |
| ;     |                  |      |   |   |
| 19209 | 199.637619018555 | 0.03 | 1 |   |
| ;     |                  |      |   |   |
| 19210 | 199.651321411133 | 0.00 | 1 |   |
| ;     |                  |      |   |   |
| 19211 | 200              | 0.01 | 1 | ; |
| 19212 | 200              | 0.01 | 1 | ; |
| 19213 | 200              | 0.04 | 1 | ; |
| 19214 | 200              | 0.01 | 1 | ; |
| 19215 | 200              | 0.01 | 1 | ; |
| 19216 | 200              | 0.07 | 1 | ; |
| 19217 | 199.953689575195 | 0.01 | 1 |   |
| ;     |                  |      |   |   |
| 19218 | 199.972320556641 | 0.02 | 1 |   |
| ;     |                  |      |   |   |
| 19219 | 200              | 0.02 | 1 | ; |
| 19220 | 200              | 0.02 | 1 | ; |
| 19221 | 199.019271850586 | 0.03 | 1 |   |
| ;     |                  |      |   |   |
| 19222 | 199.036376953125 | 0.03 | 1 |   |

|       |                  |      |   |   |   |
|-------|------------------|------|---|---|---|
| ;     |                  |      |   |   |   |
| 19223 | 199.014785766602 | 0.02 |   | 1 |   |
| ;     |                  |      |   |   |   |
| 19224 | 199.030838012695 | 0.02 |   | 1 |   |
| ;     |                  |      |   |   |   |
| 19225 | 210.404693603516 | 0.01 |   | 1 |   |
| ;     |                  |      |   |   |   |
| 19226 | 210.225540161133 | 0.03 |   | 1 |   |
| ;     |                  |      |   |   |   |
| 19227 | 210.747131347656 | 0.01 |   | 1 |   |
| ;     |                  |      |   |   |   |
| 19228 | 210.554260253906 | 0.01 |   | 1 |   |
| ;     |                  |      |   |   |   |
| 19229 | 199.889312744141 | 0.00 |   | 1 |   |
| ;     |                  |      |   |   |   |
| 19230 | 200.005874633789 | 0.00 |   | 1 |   |
| ;     |                  |      |   |   |   |
| 19231 | 200              | 0.00 | 1 |   | ; |
| 19232 | 199.815811157227 | 0.01 |   | 1 |   |
| ;     |                  |      |   |   |   |
| 19233 | 205.24836730957  | 0.04 | 1 |   | ; |
| 19234 | 204.970321655273 | 0.04 |   | 1 |   |
| ;     |                  |      |   |   |   |
| 19235 | 205.944564819336 | 0.01 |   | 1 |   |
| ;     |                  |      |   |   |   |
| 19236 | 206.033477783203 | 0.01 |   | 1 |   |
| ;     |                  |      |   |   |   |
| 19237 | 204.550857543945 | 0.07 |   | 1 |   |
| ;     |                  |      |   |   |   |
| 19238 | 194.567825317383 | 0.03 |   | 1 |   |
| ;     |                  |      |   |   |   |
| 19239 | 194.641525268555 | 0.04 |   | 1 |   |
| ;     |                  |      |   |   |   |
| 19240 | 205.657913208008 | 0.00 |   | 1 |   |
| ;     |                  |      |   |   |   |
| 19241 | 205.517868041992 | 0.02 |   | 1 |   |
| ;     |                  |      |   |   |   |
| 19242 | 213.435974121094 | 0.01 |   | 1 |   |
| ;     |                  |      |   |   |   |
| 19243 | 213.269882202148 | 0.01 |   | 1 |   |
| ;     |                  |      |   |   |   |
| 19244 | 209.48908996582  | 0.00 | 1 |   | ; |
| 19245 | 209.472686767578 | 0.00 |   | 1 |   |
| ;     |                  |      |   |   |   |
| 19246 | 195.395645141602 | 0.07 |   | 1 |   |
| ;     |                  |      |   |   |   |
| 19247 | 196.472610473633 | 0.07 |   | 1 |   |
| ;     |                  |      |   |   |   |
| 19248 | 195.610580444336 | 0.07 |   | 1 |   |
| ;     |                  |      |   |   |   |

|       |                  |      |   |   |
|-------|------------------|------|---|---|
| 19249 | 199.817123413086 | 0.02 | 1 |   |
| ;     |                  |      |   |   |
| 19250 | 199.980377197266 | 0.02 | 1 |   |
| ;     |                  |      |   |   |
| 19251 | 200              | 0.02 | 1 | ; |
| 19252 | 196.966766357422 | 0.08 | 1 |   |
| ;     |                  |      |   |   |
| 19253 | 197.073928833008 | 0.00 | 1 |   |
| ;     |                  |      |   |   |
| 19254 | 196.48225402832  | 0.02 | 1 | ; |
| 19255 | 201.718338012695 | 0.06 | 1 |   |
| ;     |                  |      |   |   |
| 19256 | 201.752868652344 | 0.02 | 1 |   |
| ;     |                  |      |   |   |
| 19257 | 210.728698730469 | 0.00 | 1 |   |
| ;     |                  |      |   |   |
| 19258 | 210.709548950195 | 0.00 | 1 |   |
| ;     |                  |      |   |   |
| 19259 | 210.9033203125   | 0.03 | 1 | ; |
| 19260 | 210.739151000977 | 0.03 | 1 |   |
| ;     |                  |      |   |   |
| 19261 | 212.126678466797 | 0.07 | 1 |   |
| ;     |                  |      |   |   |
| 19262 | 199.655395507813 | 0.00 | 1 |   |
| ;     |                  |      |   |   |
| 19263 | 199.795181274414 | 0.00 | 1 |   |
| ;     |                  |      |   |   |
| 19264 | 198.845748901367 | 0.02 | 1 |   |
| ;     |                  |      |   |   |
| 19265 | 199.378921508789 | 0.00 | 1 |   |
| ;     |                  |      |   |   |
| 19266 | 198.942733764648 | 0.01 | 1 |   |
| ;     |                  |      |   |   |
| 19267 | 197.845397949219 | 0.01 | 1 |   |
| ;     |                  |      |   |   |
| 19268 | 197.571701049805 | 0.01 | 1 |   |
| ;     |                  |      |   |   |
| 19269 | 197.830215454102 | 0.05 | 1 |   |
| ;     |                  |      |   |   |
| 19270 | 197.968826293945 | 0.01 | 1 |   |
| ;     |                  |      |   |   |
| 19271 | 197.639953613281 | 0.03 | 1 |   |
| ;     |                  |      |   |   |
| 19272 | 197.661254882813 | 0.05 | 1 |   |
| ;     |                  |      |   |   |
| 19273 | 197.854598999023 | 0.01 | 1 |   |
| ;     |                  |      |   |   |
| 19274 | 198.285888671875 | 0.02 | 1 |   |
| ;     |                  |      |   |   |
| 19275 | 199.186737060547 | 0.05 | 1 |   |

|       |                  |      |   |   |  |   |
|-------|------------------|------|---|---|--|---|
| ;     |                  |      |   |   |  |   |
| 19276 | 199.571899414063 | 0.05 |   | 1 |  |   |
| ;     |                  |      |   |   |  |   |
| 19277 | 199.408828735352 | 0.06 |   | 1 |  |   |
| ;     |                  |      |   |   |  |   |
| 19278 | 198.447692871094 | 0.06 |   | 1 |  |   |
| ;     |                  |      |   |   |  |   |
| 19279 | 198.654052734375 | 0.00 |   | 1 |  |   |
| ;     |                  |      |   |   |  |   |
| 19280 | 198.435089111328 | 0.00 |   | 1 |  |   |
| ;     |                  |      |   |   |  |   |
| 19281 | 199.167999267578 | 0.00 |   | 1 |  |   |
| ;     |                  |      |   |   |  |   |
| 19282 | 199.251541137695 | 0.01 |   | 1 |  |   |
| ;     |                  |      |   |   |  |   |
| 19283 | 200.178512573242 | 0.01 |   | 1 |  |   |
| ;     |                  |      |   |   |  |   |
| 19284 | 199.566131591797 | 0.01 |   | 1 |  |   |
| ;     |                  |      |   |   |  |   |
| 19285 | 205.953231811523 | 0.05 |   | 1 |  |   |
| ;     |                  |      |   |   |  |   |
| 19286 | 205              | 0.02 | 1 |   |  | ; |
| 19287 | 205.294982910156 | 0.02 |   | 1 |  |   |
| ;     |                  |      |   |   |  |   |
| 19288 | 205              | 0.01 | 1 |   |  | ; |
| 19289 | 205              | 0.01 | 1 |   |  | ; |
| 19290 | 206.374801635742 | 0.01 |   | 1 |  |   |
| ;     |                  |      |   |   |  |   |
| 19291 | 206.265594482422 | 0.02 |   | 1 |  |   |
| ;     |                  |      |   |   |  |   |
| 19292 | 219.106597900391 | 0.01 |   | 1 |  |   |
| ;     |                  |      |   |   |  |   |
| 19293 | 219.276992797852 | 0.00 |   | 1 |  |   |
| ;     |                  |      |   |   |  |   |
| 19294 | 219.847640991211 | 0.00 |   | 1 |  |   |
| ;     |                  |      |   |   |  |   |
| 19295 | 219.697219848633 | 0.01 |   | 1 |  |   |
| ;     |                  |      |   |   |  |   |
| 19296 | 209.148773193359 | 0.00 |   | 1 |  |   |
| ;     |                  |      |   |   |  |   |
| 19297 | 209.11474609375  | 0.00 | 1 |   |  | ; |
| 19298 | 207.85791015625  | 0.02 | 1 |   |  | ; |
| 19299 | 207.807113647461 | 0.02 |   | 1 |  |   |
| ;     |                  |      |   |   |  |   |
| 19300 | 208.053192138672 | 0.03 |   | 1 |  |   |
| ;     |                  |      |   |   |  |   |
| 19301 | 207.279388427734 | 0.04 |   | 1 |  |   |
| ;     |                  |      |   |   |  |   |
| 19302 | 207.503067016602 | 0.04 |   | 1 |  |   |
| ;     |                  |      |   |   |  |   |

|       |                  |      |   |   |  |  |
|-------|------------------|------|---|---|--|--|
| 19303 | 229.97102355957  | 0.01 | 1 |   |  |  |
| 19304 | 229.769653320312 | 0.00 |   | 1 |  |  |
| ;     |                  |      |   |   |  |  |
| 19305 | 229.763290405273 | 0.08 |   | 1 |  |  |
| ;     |                  |      |   |   |  |  |
| 19306 | 229.986709594727 | 0.08 |   | 1 |  |  |
| ;     |                  |      |   |   |  |  |
| 19307 | 200.686965942383 | 0.00 |   | 1 |  |  |
| ;     |                  |      |   |   |  |  |
| 19308 | 200.650695800781 | 0.03 |   | 1 |  |  |
| ;     |                  |      |   |   |  |  |
| 19309 | 200.938140869141 | 0.02 |   | 1 |  |  |
| ;     |                  |      |   |   |  |  |
| 19310 | 200.72331237793  | 0.00 | 1 |   |  |  |
| 19311 | 200.794219970703 | 0.00 |   | 1 |  |  |
| ;     |                  |      |   |   |  |  |
| 19312 | 200.629272460938 | 0.00 |   | 1 |  |  |
| ;     |                  |      |   |   |  |  |
| 19313 | 200.401214599609 | 0.01 |   | 1 |  |  |
| ;     |                  |      |   |   |  |  |
| 19314 | 201.085662841797 | 0.02 |   | 1 |  |  |
| ;     |                  |      |   |   |  |  |
| 19315 | 207.112442016602 | 0.01 |   | 1 |  |  |
| ;     |                  |      |   |   |  |  |
| 19316 | 208.570007324219 | 0.01 |   | 1 |  |  |
| ;     |                  |      |   |   |  |  |
| 19317 | 208.066421508789 | 0.01 |   | 1 |  |  |
| ;     |                  |      |   |   |  |  |
| 19318 | 208.386245727539 | 0.01 |   | 1 |  |  |
| ;     |                  |      |   |   |  |  |
| 19319 | 209.101531982422 | 0.04 |   | 1 |  |  |
| ;     |                  |      |   |   |  |  |
| 19320 | 209.495407104492 | 0.04 |   | 1 |  |  |
| ;     |                  |      |   |   |  |  |
| 19321 | 208.966995239258 | 0.05 |   | 1 |  |  |
| ;     |                  |      |   |   |  |  |
| 19322 | 209.460357666016 | 0.05 |   | 1 |  |  |
| ;     |                  |      |   |   |  |  |
| 19323 | 208.906860351563 | 0.00 |   | 1 |  |  |
| ;     |                  |      |   |   |  |  |
| 19324 | 208.744323730469 | 0.00 |   | 1 |  |  |
| ;     |                  |      |   |   |  |  |
| 19325 | 209.110366821289 | 0.02 |   | 1 |  |  |
| ;     |                  |      |   |   |  |  |
| 19326 | 209.164688110352 | 0.05 |   | 1 |  |  |
| ;     |                  |      |   |   |  |  |
| 19327 | 198.637405395508 | 0.00 |   | 1 |  |  |
| ;     |                  |      |   |   |  |  |
| 19328 | 198.325256347656 | 0.02 |   | 1 |  |  |
| ;     |                  |      |   |   |  |  |



|       |                  |      |   |   |
|-------|------------------|------|---|---|
| 19329 | 198.685333251953 | 0.01 | 1 |   |
| ;     |                  |      |   |   |
| 19330 | 198.655639648438 | 0.03 | 1 |   |
| ;     |                  |      |   |   |
| 19331 | 214.803100585937 | 0.02 | 1 |   |
| ;     |                  |      |   |   |
| 19332 | 214.99543762207  | 0.02 | 1 |   |
| 19333 | 217.689743041992 | 0.01 | 1 | ; |
| ;     |                  |      |   |   |
| 19334 | 217.462524414063 | 0.01 | 1 |   |
| ;     |                  |      |   |   |
| 19335 | 217.805557250977 | 0.00 | 1 |   |
| ;     |                  |      |   |   |
| 19336 | 218.018936157227 | 0.00 | 1 |   |
| ;     |                  |      |   |   |
| 19337 | 201.148284912109 | 0.02 | 1 |   |
| ;     |                  |      |   |   |
| 19338 | 201.650360107422 | 0.06 | 1 |   |
| ;     |                  |      |   |   |
| 19339 | 205              | 0.02 | 1 | ; |
| 19340 | 207.189071655273 | 0.05 | 1 |   |
| ;     |                  |      |   |   |
| 19341 | 206.775650024414 | 0.01 | 1 |   |
| ;     |                  |      |   |   |
| 19342 | 218.179748535156 | 0.03 | 1 |   |
| ;     |                  |      |   |   |
| 19343 | 218.442565917969 | 0.04 | 1 |   |
| ;     |                  |      |   |   |
| 19344 | 205.813323974609 | 0.02 | 1 |   |
| ;     |                  |      |   |   |
| 19345 | 205.331451416016 | 0.05 | 1 |   |
| ;     |                  |      |   |   |
| 19346 | 205              | 0.04 | 1 | ; |
| 19347 | 200.672561645508 | 0.03 | 1 |   |
| ;     |                  |      |   |   |
| 19348 | 201.152557373047 | 0.02 | 1 |   |
| ;     |                  |      |   |   |
| 19349 | 200.39421081543  | 0.06 | 1 | ; |
| 19350 | 200.874877929688 | 0.01 | 1 |   |
| ;     |                  |      |   |   |
| 19351 | 200.738494873047 | 0.01 | 1 |   |
| ;     |                  |      |   |   |
| 19352 | 198.714401245117 | 0.04 | 1 |   |
| ;     |                  |      |   |   |
| 19353 | 198.461120605469 | 0.01 | 1 |   |
| ;     |                  |      |   |   |
| 19354 | 198.966125488281 | 0.03 | 1 |   |
| ;     |                  |      |   |   |
| 19355 | 197.991790771484 | 0.06 | 1 |   |
| ;     |                  |      |   |   |

|       |                  |      |   |   |
|-------|------------------|------|---|---|
| 19356 | 198.323165893555 | 0.06 | 1 |   |
| ;     |                  |      |   |   |
| 19357 | 199.256530761719 | 0.02 | 1 |   |
| ;     |                  |      |   |   |
| 19358 | 199.077499389648 | 0.01 | 1 |   |
| ;     |                  |      |   |   |
| 19359 | 199.664672851563 | 0.01 | 1 |   |
| ;     |                  |      |   |   |
| 19360 | 199.836242675781 | 0.01 | 1 |   |
| ;     |                  |      |   |   |
| 19361 | 199.431945800781 | 0.06 | 1 |   |
| ;     |                  |      |   |   |
| 19362 | 200.095809936523 | 0.06 | 1 |   |
| ;     |                  |      |   |   |
| 19363 | 198.654541015625 | 0.03 | 1 |   |
| ;     |                  |      |   |   |
| 19364 | 194.254348754883 | 0.03 | 1 |   |
| ;     |                  |      |   |   |
| 19365 | 194.883850097656 | 0.03 | 1 |   |
| ;     |                  |      |   |   |
| 19366 | 193.552795410156 | 0.00 | 1 |   |
| ;     |                  |      |   |   |
| 19367 | 193.486114501953 | 0.00 | 1 |   |
| ;     |                  |      |   |   |
| 19368 | 199.265853881836 | 0.00 | 1 |   |
| ;     |                  |      |   |   |
| 19369 | 199.325500488281 | 0.07 | 1 |   |
| ;     |                  |      |   |   |
| 19370 | 204.495803833008 | 0.04 | 1 |   |
| ;     |                  |      |   |   |
| 19371 | 203.265640258789 | 0.03 | 1 |   |
| ;     |                  |      |   |   |
| 19372 | 203.06477355957  | 0.03 | 1 |   |
| 19373 | 201.600494384766 | 0.03 | 1 | ; |
| ;     |                  |      |   |   |
| 19374 | 199.589965820313 | 0.01 | 1 |   |
| ;     |                  |      |   |   |
| 19375 | 200.020858764648 | 0.01 | 1 |   |
| ;     |                  |      |   |   |
| 19376 | 200.29248046875  | 0.01 | 1 | ; |
| 19377 | 195.687316894531 | 0.00 | 1 |   |
| ;     |                  |      |   |   |
| 19378 | 195.419174194336 | 0.01 | 1 |   |
| ;     |                  |      |   |   |
| 19379 | 205.786834716797 | 0.02 | 1 |   |
| ;     |                  |      |   |   |
| 19380 | 206.060943603516 | 0.03 | 1 |   |
| ;     |                  |      |   |   |
| 19381 | 205.606079101563 | 0.00 | 1 |   |
| ;     |                  |      |   |   |

|       |                  |      |   |   |
|-------|------------------|------|---|---|
| 19382 | 205.803024291992 | 0.04 | 1 |   |
| ;     |                  |      |   |   |
| 19383 | 209.777740478516 | 1.39 | 1 |   |
| ;     |                  |      |   |   |
| 19384 | 214.594497680664 | 0.09 | 1 |   |
| ;     |                  |      |   |   |
| 19385 | 213.043823242188 | 0.02 | 1 |   |
| ;     |                  |      |   |   |
| 19386 | 214.395980834961 | 0.00 | 1 |   |
| ;     |                  |      |   |   |
| 19387 | 214.706985473633 | 0.01 | 1 |   |
| ;     |                  |      |   |   |
| 19388 | 214.554321289063 | 0.01 | 1 |   |
| ;     |                  |      |   |   |
| 19389 | 206.819244384766 | 0.01 | 1 |   |
| ;     |                  |      |   |   |
| 19390 | 206.76936340332  | 0.01 | 1 | ; |
| 19391 | 209.323593139648 | 0.02 | 1 |   |
| ;     |                  |      |   |   |
| 19392 | 209.498336791992 | 0.02 | 1 |   |
| ;     |                  |      |   |   |
| 19393 | 209.5380859375   | 0.01 | 1 | ; |
| 19394 | 209.997848510742 | 0.05 | 1 |   |
| ;     |                  |      |   |   |
| 19395 | 209.525268554688 | 0.05 | 1 |   |
| ;     |                  |      |   |   |
| 19396 | 210.151138305664 | 0.02 | 1 |   |
| ;     |                  |      |   |   |
| 19397 | 209.301574707031 | 0.03 | 1 |   |
| ;     |                  |      |   |   |
| 19398 | 209.3505859375   | 0.03 | 1 | ; |
| 19399 | 210.237991333008 | 0.00 | 1 |   |
| ;     |                  |      |   |   |
| 19400 | 210.625778198242 | 0.02 | 1 |   |
| ;     |                  |      |   |   |
| 19401 | 207.52587890625  | 0.04 | 1 | ; |
| 19402 | 207.189376831055 | 0.02 | 1 |   |
| ;     |                  |      |   |   |
| 19403 | 208.353439331055 | 0.03 | 1 |   |
| ;     |                  |      |   |   |
| 19404 | 213.444763183594 | 0.00 | 1 |   |
| ;     |                  |      |   |   |
| 19405 | 213.515274047852 | 0.00 | 1 |   |
| ;     |                  |      |   |   |
| 19406 | 213.744018554687 | 0.00 | 1 |   |
| ;     |                  |      |   |   |
| 19407 | 213.79296875     | 0.00 | 1 | ; |
| 19408 | 213.885848999023 | 0.00 | 1 |   |
| ;     |                  |      |   |   |
| 19409 | 214.290771484375 | 0.01 | 1 |   |

|       |                  |      |   |   |   |
|-------|------------------|------|---|---|---|
| ;     |                  |      |   |   |   |
| 19410 | 214.197372436523 | 0.01 | 1 |   |   |
| ;     |                  |      |   |   |   |
| 19411 | 210              | 0.04 | 1 |   | ; |
| 19412 | 209.928085327148 | 0.04 |   | 1 |   |
| ;     |                  |      |   |   |   |
| 19413 | 210.085327148437 | 0.00 |   | 1 |   |
| ;     |                  |      |   |   |   |
| 19414 | 192.454940795898 | 0.02 |   | 1 |   |
| ;     |                  |      |   |   |   |
| 19415 | 194.34407043457  | 0.00 | 1 |   | ; |
| 19416 | 196.1376953125   | 0.02 | 1 |   | ; |
| 19417 | 195.912155151367 | 0.04 |   | 1 |   |
| ;     |                  |      |   |   |   |
| 19418 | 195.715774536133 | 0.05 |   | 1 |   |
| ;     |                  |      |   |   |   |
| 19419 | 195.593872070313 | 0.03 |   | 1 |   |
| ;     |                  |      |   |   |   |
| 19420 | 195.265197753906 | 0.04 |   | 1 |   |
| ;     |                  |      |   |   |   |
| 19421 | 195.30712890625  | 0.02 | 1 |   | ; |
| 19422 | 195.452667236328 | 0.01 |   | 1 |   |
| ;     |                  |      |   |   |   |
| 19423 | 194.996124267578 | 0.03 |   | 1 |   |
| ;     |                  |      |   |   |   |
| 19424 | 195.251663208008 | 0.03 |   | 1 |   |
| ;     |                  |      |   |   |   |
| 19425 | 195.310348510742 | 0.03 |   | 1 |   |
| ;     |                  |      |   |   |   |
| 19426 | 195.57861328125  | 0.02 | 1 |   | ; |
| 19427 | 195.927185058594 | 0.01 |   | 1 |   |
| ;     |                  |      |   |   |   |
| 19428 | 195.647537231445 | 0.01 |   | 1 |   |
| ;     |                  |      |   |   |   |
| 19429 | 197.736114501953 | 0.00 |   | 1 |   |
| ;     |                  |      |   |   |   |
| 19430 | 197.882843017578 | 0.04 |   | 1 |   |
| ;     |                  |      |   |   |   |
| 19431 | 197.798843383789 | 0.01 |   | 1 |   |
| ;     |                  |      |   |   |   |
| 19432 | 197.68603515625  | 0.00 | 1 |   | ; |
| 19433 | 197.482894897461 | 0.01 |   | 1 |   |
| ;     |                  |      |   |   |   |
| 19434 | 197.397018432617 | 0.01 |   | 1 |   |
| ;     |                  |      |   |   |   |
| 19435 | 196.730880737305 | 0.02 |   | 1 |   |
| ;     |                  |      |   |   |   |
| 19436 | 197.130294799805 | 0.02 |   | 1 |   |
| ;     |                  |      |   |   |   |
| 19437 | 197.093124389648 | 0.01 |   | 1 |   |

|       |                  |      |   |   |   |
|-------|------------------|------|---|---|---|
| ;     |                  |      |   |   |   |
| 19438 | 197.049179077148 | 0.01 |   | 1 |   |
| ;     |                  |      |   |   |   |
| 19439 | 196.7529296875   | 0.03 | 1 |   | ; |
| 19440 | 196.67985534668  | 0.03 | 1 |   | ; |
| 19441 | 196.347671508789 | 0.02 |   | 1 |   |
| ;     |                  |      |   |   |   |
| 19442 | 196.428573608398 | 0.02 |   | 1 |   |
| ;     |                  |      |   |   |   |
| 19443 | 218.424209594727 | 0.02 |   | 1 |   |
| ;     |                  |      |   |   |   |
| 19444 | 218.484298706055 | 0.00 |   | 1 |   |
| ;     |                  |      |   |   |   |
| 19445 | 217.146987915039 | 0.01 |   | 1 |   |
| ;     |                  |      |   |   |   |
| 19446 | 217.719207763672 | 0.03 |   | 1 |   |
| ;     |                  |      |   |   |   |
| 19447 | 210.824768066406 | 0.02 |   | 1 |   |
| ;     |                  |      |   |   |   |
| 19448 | 210.975173950195 | 0.07 |   | 1 |   |
| ;     |                  |      |   |   |   |
| 19449 | 195.555374145508 | 0.00 |   | 1 |   |
| ;     |                  |      |   |   |   |
| 19450 | 195.38444519043  | 0.00 | 1 |   | ; |
| 19451 | 205              | 0.02 | 1 |   | ; |
| 19452 | 205.662734985352 | 0.03 |   | 1 |   |
| ;     |                  |      |   |   |   |
| 19453 | 205.698135375977 | 0.02 |   | 1 |   |
| ;     |                  |      |   |   |   |
| 19454 | 206.292663574219 | 0.02 |   | 1 |   |
| ;     |                  |      |   |   |   |
| 19455 | 206.364120483398 | 0.00 |   | 1 |   |
| ;     |                  |      |   |   |   |
| 19456 | 195.74365234375  | 0.03 | 1 |   | ; |
| 19457 | 195.864547729492 | 0.09 |   | 1 |   |
| ;     |                  |      |   |   |   |
| 19458 | 196.133148193359 | 0.04 |   | 1 |   |
| ;     |                  |      |   |   |   |
| 19459 | 195.742385864258 | 0.05 |   | 1 |   |
| ;     |                  |      |   |   |   |
| 19460 | 194.470642089844 | 0.02 |   | 1 |   |
| ;     |                  |      |   |   |   |
| 19461 | 194.237731933594 | 0.02 |   | 1 |   |
| ;     |                  |      |   |   |   |
| 19462 | 195.797973632812 | 0.05 |   | 1 |   |
| ;     |                  |      |   |   |   |
| 19463 | 210.735260009766 | 0.05 |   | 1 |   |
| ;     |                  |      |   |   |   |
| 19464 | 205.906204223633 | 0.06 |   | 1 |   |
| ;     |                  |      |   |   |   |

|       |                  |      |   |  |
|-------|------------------|------|---|--|
| 19465 | 205.615753173828 | 0.02 | 1 |  |
| ;     |                  |      |   |  |
| 19466 | 201.225326538086 | 0.03 | 1 |  |
| ;     |                  |      |   |  |
| 19467 | 201.058074951172 | 0.01 | 1 |  |
| ;     |                  |      |   |  |
| 19468 | 202.038787841797 | 0.03 | 1 |  |
| ;     |                  |      |   |  |
| 19469 | 202.134368896484 | 0.04 | 1 |  |
| ;     |                  |      |   |  |
| 19470 | 210.410293579102 | 0.05 | 1 |  |
| ;     |                  |      |   |  |
| 19471 | 209.51106262207  | 0.05 | 1 |  |
| 19472 | 205.520217895508 | 0.00 | 1 |  |
| ;     |                  |      |   |  |
| 19473 | 205.398406982422 | 0.00 | 1 |  |
| ;     |                  |      |   |  |
| 19474 | 205.381011962891 | 0.03 | 1 |  |
| ;     |                  |      |   |  |
| 19475 | 205.940536499023 | 0.04 | 1 |  |
| ;     |                  |      |   |  |
| 19476 | 205.555084228516 | 0.02 | 1 |  |
| ;     |                  |      |   |  |
| 19477 | 200              | 0.03 | 1 |  |
| 19478 | 200              | 0.02 | 1 |  |
| 19479 | 200              | 0.08 | 1 |  |
| 19480 | 200              | 0.04 | 1 |  |
| 19481 | 203.697280883789 | 0.01 | 1 |  |
| ;     |                  |      |   |  |
| 19482 | 203.4951171875   | 0.01 | 1 |  |
| 19483 | 203.023056030273 | 0.04 | 1 |  |
| ;     |                  |      |   |  |
| 19484 | 203.373016357422 | 0.03 | 1 |  |
| ;     |                  |      |   |  |
| 19485 | 203.399627685547 | 0.02 | 1 |  |
| ;     |                  |      |   |  |
| 19486 | 202.396209716797 | 0.00 | 1 |  |
| ;     |                  |      |   |  |
| 19487 | 204.267074584961 | 0.02 | 1 |  |
| ;     |                  |      |   |  |
| 19488 | 210.413436889648 | 0.03 | 1 |  |
| ;     |                  |      |   |  |
| 19489 | 211.047744750977 | 0.03 | 1 |  |
| ;     |                  |      |   |  |
| 19490 | 210.933746337891 | 0.00 | 1 |  |
| ;     |                  |      |   |  |
| 19491 | 210.670135498047 | 0.01 | 1 |  |
| ;     |                  |      |   |  |
| 19492 | 201.18017578125  | 0.00 | 1 |  |
| 19493 | 201.821411132813 | 0.05 | 1 |  |

|       |                  |      |   |   |   |
|-------|------------------|------|---|---|---|
| ;     |                  |      |   |   |   |
| 19494 | 205              | 0.00 | 1 |   | ; |
| 19495 | 207.47917175293  | 0.00 | 1 |   | ; |
| 19496 | 199.981796264648 | 0.01 |   | 1 |   |
| ;     |                  |      |   |   |   |
| 19497 | 199.962127685547 | 0.01 |   | 1 |   |
| ;     |                  |      |   |   |   |
| 19498 | 209.414886474609 | 0.03 |   | 1 |   |
| ;     |                  |      |   |   |   |
| 19499 | 216.685577392578 | 0.02 |   | 1 |   |
| ;     |                  |      |   |   |   |
| 19500 | 208.05647277832  | 0.02 | 1 |   | ; |
| 19501 | 207.955276489258 | 0.00 |   | 1 |   |
| ;     |                  |      |   |   |   |
| 19502 | 208.151931762695 | 0.01 |   | 1 |   |
| ;     |                  |      |   |   |   |
| 19503 | 208.260879516602 | 0.00 |   | 1 |   |
| ;     |                  |      |   |   |   |
| 19504 | 200.530395507813 | 0.01 |   | 1 |   |
| ;     |                  |      |   |   |   |
| 19505 | 200.82160949707  | 0.01 | 1 |   | ; |
| 19506 | 201.227310180664 | 0.03 |   | 1 |   |
| ;     |                  |      |   |   |   |
| 19507 | 201.544296264648 | 0.01 |   | 1 |   |
| ;     |                  |      |   |   |   |
| 19508 | 201.043899536133 | 0.03 |   | 1 |   |
| ;     |                  |      |   |   |   |
| 19509 | 201.888290405273 | 0.05 |   | 1 |   |
| ;     |                  |      |   |   |   |
| 19510 | 200.704406738281 | 0.02 |   | 1 |   |
| ;     |                  |      |   |   |   |
| 19511 | 201.140472412109 | 0.01 |   | 1 |   |
| ;     |                  |      |   |   |   |
| 19512 | 201.387664794922 | 0.01 |   | 1 |   |
| ;     |                  |      |   |   |   |
| 19513 | 200.713302612305 | 0.00 |   | 1 |   |
| ;     |                  |      |   |   |   |
| 19514 | 200.836288452148 | 0.06 |   | 1 |   |
| ;     |                  |      |   |   |   |
| 19515 | 207.535278320313 | 0.01 |   | 1 |   |
| ;     |                  |      |   |   |   |
| 19516 | 207.556365966797 | 0.00 |   | 1 |   |
| ;     |                  |      |   |   |   |
| 19517 | 207.544326782227 | 0.01 |   | 1 |   |
| ;     |                  |      |   |   |   |
| 19518 | 205.329498291016 | 0.02 |   | 1 |   |
| ;     |                  |      |   |   |   |
| 19519 | 205.994918823242 | 0.05 |   | 1 |   |
| ;     |                  |      |   |   |   |
| 19520 | 205.624908447266 | 0.03 |   | 1 |   |

|       |                  |      |   |   |
|-------|------------------|------|---|---|
| ;     |                  |      |   |   |
| 19521 | 214.976181030273 | 0.01 | 1 |   |
| ;     |                  |      |   |   |
| 19522 | 215.275924682617 | 0.01 | 1 |   |
| ;     |                  |      |   |   |
| 19523 | 223.971069335938 | 0.01 | 1 |   |
| ;     |                  |      |   |   |
| 19524 | 224.261840820313 | 0.00 | 1 |   |
| ;     |                  |      |   |   |
| 19525 | 220.491088867188 | 0.03 | 1 |   |
| ;     |                  |      |   |   |
| 19526 | 220.788391113281 | 0.03 | 1 |   |
| ;     |                  |      |   |   |
| 19527 | 200.967102050781 | 0.01 | 1 |   |
| ;     |                  |      |   |   |
| 19528 | 201.855102539063 | 0.01 | 1 |   |
| ;     |                  |      |   |   |
| 19529 | 201.917953491211 | 0.03 | 1 |   |
| ;     |                  |      |   |   |
| 19530 | 226.139587402344 | 0.07 | 1 |   |
| ;     |                  |      |   |   |
| 19531 | 227.212860107422 | 0.03 | 1 |   |
| ;     |                  |      |   |   |
| 19532 | 229.875793457031 | 0.03 | 1 |   |
| ;     |                  |      |   |   |
| 19533 | 230.299285888672 | 0.03 | 1 |   |
| ;     |                  |      |   |   |
| 19534 | 204.686294555664 | 0.01 | 1 |   |
| ;     |                  |      |   |   |
| 19535 | 205              | 0.15 | 1 | ; |
| 19536 | 201.130096435547 | 0.00 | 1 |   |
| ;     |                  |      |   |   |
| 19537 | 201.174728393555 | 0.00 | 1 |   |
| ;     |                  |      |   |   |
| 19538 | 201.127380371094 | 0.00 | 1 |   |
| ;     |                  |      |   |   |
| 19539 | 201.219223022461 | 0.04 | 1 |   |
| ;     |                  |      |   |   |
| 19540 | 196.684844970703 | 0.00 | 1 |   |
| ;     |                  |      |   |   |
| 19541 | 196.703491210938 | 0.01 | 1 |   |
| ;     |                  |      |   |   |
| 19542 | 193.020431518555 | 0.04 | 1 |   |
| ;     |                  |      |   |   |
| 19543 | 193.613082885742 | 0.04 | 1 |   |
| ;     |                  |      |   |   |
| 19544 | 194.334213256836 | 0.04 | 1 |   |
| ;     |                  |      |   |   |
| 19545 | 194.157531738281 | 0.05 | 1 |   |
| ;     |                  |      |   |   |



|       |                  |      |   |   |
|-------|------------------|------|---|---|
| 19546 | 199.339309692383 | 0.00 | 1 |   |
| ;     |                  |      |   |   |
| 19547 | 199.350524902344 | 0.00 | 1 |   |
| ;     |                  |      |   |   |
| 19548 | 198.966339111328 | 0.00 | 1 |   |
| ;     |                  |      |   |   |
| 19549 | 199.508239746094 | 0.07 | 1 |   |
| ;     |                  |      |   |   |
| 19550 | 194.192153930664 | 0.02 | 1 |   |
| ;     |                  |      |   |   |
| 19551 | 194.202682495117 | 0.00 | 1 |   |
| ;     |                  |      |   |   |
| 19552 | 206.136779785156 | 0.00 | 1 |   |
| ;     |                  |      |   |   |
| 19553 | 204.60823059082  | 0.01 | 1 |   |
| 19554 | 204.617706298828 | 0.01 | 1 | ; |
| ;     |                  |      |   |   |
| 19555 | 205.752960205078 | 0.15 | 1 |   |
| ;     |                  |      |   |   |
| 19556 | 205.760482788086 | 0.01 | 1 |   |
| ;     |                  |      |   |   |
| 19557 | 205.74543762207  | 0.03 | 1 |   |
| 19558 | 204.592636108398 | 0.02 | 1 | ; |
| ;     |                  |      |   |   |
| 19559 | 204.602096557617 | 0.00 | 1 |   |
| ;     |                  |      |   |   |
| 19560 | 204.549499511719 | 0.02 | 1 |   |
| ;     |                  |      |   |   |
| 19561 | 204.562545776367 | 0.05 | 1 |   |
| ;     |                  |      |   |   |
| 19562 | 194.481857299805 | 0.01 | 1 |   |
| ;     |                  |      |   |   |
| 19563 | 194.471160888672 | 0.01 | 1 |   |
| ;     |                  |      |   |   |
| 19564 | 194.439804077148 | 0.01 | 1 |   |
| ;     |                  |      |   |   |
| 19565 | 194.435684204102 | 0.01 | 1 |   |
| ;     |                  |      |   |   |
| 19566 | 194.035308837891 | 0.01 | 1 |   |
| ;     |                  |      |   |   |
| 19567 | 203.130065917969 | 0.00 | 1 |   |
| ;     |                  |      |   |   |
| 19568 | 201.372100830078 | 0.03 | 1 |   |
| ;     |                  |      |   |   |
| 19569 | 201.381332397461 | 0.07 | 1 |   |
| ;     |                  |      |   |   |
| 19570 | 201.58984375     | 0.02 | 1 |   |
| 19571 | 201.579727172852 | 0.00 | 1 | ; |
| ;     |                  |      |   |   |
| 19572 | 201.600067138672 | 0.05 | 1 |   |

|       |                  |      |   |   |
|-------|------------------|------|---|---|
| ;     |                  |      |   |   |
| 19573 | 218.397811889648 | 0.01 | 1 |   |
| ;     |                  |      |   |   |
| 19574 | 218.370849609375 | 0.02 | 1 |   |
| ;     |                  |      |   |   |
| 19575 | 217.722152709961 | 0.02 | 1 |   |
| ;     |                  |      |   |   |
| 19576 | 217.707641601563 | 0.00 | 1 |   |
| ;     |                  |      |   |   |
| 19577 | 211.159088134766 | 0.03 | 1 |   |
| ;     |                  |      |   |   |
| 19578 | 211.173873901367 | 0.03 | 1 |   |
| ;     |                  |      |   |   |
| 19579 | 196.006637573242 | 0.01 | 1 |   |
| ;     |                  |      |   |   |
| 19580 | 196.18376159668  | 0.01 | 1 | ; |
| 19581 | 220.313980102539 | 0.01 | 1 |   |
| ;     |                  |      |   |   |
| 19582 | 220.317398071289 | 0.03 | 1 |   |
| ;     |                  |      |   |   |
| 19583 | 234.504150390625 | 0.02 | 1 |   |
| ;     |                  |      |   |   |
| 19584 | 234.522964477539 | 0.04 | 1 |   |
| ;     |                  |      |   |   |
| 19585 | 232.898788452148 | 0.02 | 1 |   |
| ;     |                  |      |   |   |
| 19586 | 232.917938232422 | 0.02 | 1 |   |
| ;     |                  |      |   |   |
| 19587 | 232.941162109375 | 0.01 | 1 |   |
| ;     |                  |      |   |   |
| 19588 | 232.959838867188 | 0.02 | 1 |   |
| ;     |                  |      |   |   |
| 19589 | 232.734497070313 | 0.01 | 1 |   |
| ;     |                  |      |   |   |
| 19590 | 232.757049560547 | 0.01 | 1 |   |
| ;     |                  |      |   |   |
| 19591 | 233.831848144531 | 0.02 | 1 |   |
| ;     |                  |      |   |   |
| 19592 | 233.813354492188 | 0.02 | 1 |   |
| ;     |                  |      |   |   |
| 19593 | 232.155349731445 | 0.01 | 1 |   |
| ;     |                  |      |   |   |
| 19594 | 232.163223266602 | 0.02 | 1 |   |
| ;     |                  |      |   |   |
| 19595 | 231.82356262207  | 0.01 | 1 | ; |
| 19596 | 231.828811645508 | 0.02 | 1 |   |
| ;     |                  |      |   |   |
| 19597 | 231.496292114258 | 0.00 | 1 |   |
| ;     |                  |      |   |   |
| 19598 | 231.510284423828 | 0.01 | 1 |   |

|       |                  |      |   |   |
|-------|------------------|------|---|---|
| ;     |                  |      |   |   |
| 19599 | 231.127410888672 | 0.02 | 1 |   |
| ;     |                  |      |   |   |
| 19600 | 231.108581542969 | 0.00 | 1 |   |
| ;     |                  |      |   |   |
| 19601 | 230.852935791016 | 0.01 | 1 |   |
| ;     |                  |      |   |   |
| 19602 | 230.872100830078 | 0.01 | 1 |   |
| ;     |                  |      |   |   |
| 19603 | 192.419815063477 | 0.01 | 1 |   |
| ;     |                  |      |   |   |
| 19604 | 192.421249389648 | 0.01 | 1 |   |
| ;     |                  |      |   |   |
| 19605 | 192.669403076172 | 0.02 | 1 |   |
| ;     |                  |      |   |   |
| 19606 | 192.67138671875  | 0.02 | 1 | ; |
| 19607 | 192.917221069336 | 0.02 | 1 |   |
| ;     |                  |      |   |   |
| 19608 | 192.919525146484 | 0.00 | 1 |   |
| ;     |                  |      |   |   |
| 19609 | 217.519454956055 | 0.00 | 1 |   |
| ;     |                  |      |   |   |
| 19610 | 217.535247802734 | 0.00 | 1 |   |
| ;     |                  |      |   |   |
| 19611 | 221.57160949707  | 0.00 | 1 | ; |
| 19612 | 221.571594238281 | 0.02 | 1 |   |
| ;     |                  |      |   |   |
| 19613 | 221.679992675781 | 0.01 | 1 |   |
| ;     |                  |      |   |   |
| 19614 | 221.681701660156 | 0.02 | 1 |   |
| ;     |                  |      |   |   |
| 19615 | 221.655258178711 | 0.01 | 1 |   |
| ;     |                  |      |   |   |
| 19616 | 222.047744750977 | 0.01 | 1 |   |
| ;     |                  |      |   |   |
| 19617 | 222.053268432617 | 0.03 | 1 |   |
| ;     |                  |      |   |   |
| 19618 | 233.826248168945 | 0.02 | 1 |   |
| ;     |                  |      |   |   |
| 19619 | 233.807754516602 | 0.02 | 1 |   |
| ;     |                  |      |   |   |
| 19620 | 234.178955078125 | 0.00 | 1 |   |
| ;     |                  |      |   |   |
| 19621 | 234.196502685547 | 0.05 | 1 |   |
| ;     |                  |      |   |   |
| 19622 | 234.161361694336 | 0.01 | 1 |   |
| ;     |                  |      |   |   |
| 19623 | 235.570892333984 | 0.00 | 1 |   |
| ;     |                  |      |   |   |
| 19624 | 235.593597412109 | 0.02 | 1 |   |

|       |                  |      |   |   |   |
|-------|------------------|------|---|---|---|
| ;     |                  |      |   |   |   |
| 19625 | 229.869873046875 | 0.02 |   | 1 |   |
| ;     |                  |      |   |   |   |
| 19626 | 233.559234619141 | 0.01 |   | 1 |   |
| ;     |                  |      |   |   |   |
| 19627 | 233.581970214844 | 0.02 |   | 1 |   |
| ;     |                  |      |   |   |   |
| 19628 | 236.270080566406 | 0.02 |   | 1 |   |
| ;     |                  |      |   |   |   |
| 19629 | 236.272521972656 | 0.00 |   | 1 |   |
| ;     |                  |      |   |   |   |
| 19630 | 235.739517211914 | 0.02 |   | 1 |   |
| ;     |                  |      |   |   |   |
| 19631 | 235.754501342773 | 0.02 |   | 1 |   |
| ;     |                  |      |   |   |   |
| 19632 | 236.013595581055 | 0.00 |   | 1 |   |
| ;     |                  |      |   |   |   |
| 19633 | 235.995315551758 | 0.00 |   | 1 |   |
| ;     |                  |      |   |   |   |
| 19634 | 234.221450805664 | 0.00 |   | 1 |   |
| ;     |                  |      |   |   |   |
| 19635 | 234.240951538086 | 0.00 |   | 1 |   |
| ;     |                  |      |   |   |   |
| 19636 | 227.10188293457  | 0.03 | 1 |   | ; |
| 19637 | 227.328735351563 | 0.05 |   | 1 |   |
| ;     |                  |      |   |   |   |
| 19638 | 225.253509521484 | 0.07 |   | 1 |   |
| ;     |                  |      |   |   |   |
| 19639 | 225.22200012207  | 0.04 | 1 |   | ; |
| 19640 | 223.989288330078 | 0.06 |   | 1 |   |
| ;     |                  |      |   |   |   |
| 19641 | 206.985733032227 | 0.15 |   | 1 |   |
| ;     |                  |      |   |   |   |
| 19642 | 205.70378112793  | 0.05 | 1 |   | ; |
| 19643 | 200.982864379883 | 0.01 |   | 1 |   |
| ;     |                  |      |   |   |   |
| 19644 | 200.951187133789 | 0.01 |   | 1 |   |
| ;     |                  |      |   |   |   |
| 19645 | 201.935363769531 | 0.01 |   | 1 |   |
| ;     |                  |      |   |   |   |
| 19646 | 201.534805297852 | 0.01 |   | 1 |   |
| ;     |                  |      |   |   |   |
| 19647 | 204.009582519531 | 0.02 |   | 1 |   |
| ;     |                  |      |   |   |   |
| 19648 | 203.999969482422 | 0.01 |   | 1 |   |
| ;     |                  |      |   |   |   |
| 19649 | 195.856506347656 | 0.00 |   | 1 |   |
| ;     |                  |      |   |   |   |
| 19650 | 195.866638183594 | 0.00 |   | 1 |   |
| ;     |                  |      |   |   |   |

|       |                  |      |   |   |
|-------|------------------|------|---|---|
| 19651 | 217.468780517578 | 0.01 | 1 |   |
| ;     |                  |      |   |   |
| 19652 | 217.459945678711 | 0.03 | 1 |   |
| ;     |                  |      |   |   |
| 19653 | 206.586959838867 | 0.01 | 1 |   |
| ;     |                  |      |   |   |
| 19654 | 206.592971801758 | 0.09 | 1 |   |
| ;     |                  |      |   |   |
| 19655 | 203.592147827148 | 0.01 | 1 |   |
| ;     |                  |      |   |   |
| 19656 | 229.949478149414 | 0.01 | 1 |   |
| ;     |                  |      |   |   |
| 19657 | 229.93522644043  | 0.01 | 1 | ; |
| 19658 | 230.25276184082  | 0.01 | 1 | ; |
| 19659 | 230.238082885742 | 0.01 | 1 |   |
| ;     |                  |      |   |   |
| 19660 | 205.298934936523 | 0.01 | 1 |   |
| ;     |                  |      |   |   |
| 19661 | 205.314926147461 | 0.12 | 1 |   |
| ;     |                  |      |   |   |
| 19662 | 206.135513305664 | 0.01 | 1 |   |
| ;     |                  |      |   |   |
| 19663 | 205.985336303711 | 0.02 | 1 |   |
| ;     |                  |      |   |   |
| 19664 | 205.983322143555 | 0.04 | 1 |   |
| ;     |                  |      |   |   |
| 19665 | 205.973403930664 | 0.01 | 1 |   |
| ;     |                  |      |   |   |
| 19666 | 205.254684448242 | 0.03 | 1 |   |
| ;     |                  |      |   |   |
| 19667 | 191.229156494141 | 0.00 | 1 |   |
| ;     |                  |      |   |   |
| 19668 | 191.263198852539 | 0.03 | 1 |   |
| ;     |                  |      |   |   |
| 19669 | 216.427673339844 | 0.02 | 1 |   |
| ;     |                  |      |   |   |
| 19670 | 216.052230834961 | 0.02 | 1 |   |
| ;     |                  |      |   |   |
| 19671 | 216.056076049805 | 0.05 | 1 |   |
| ;     |                  |      |   |   |
| 19672 | 216.04833984375  | 0.02 | 1 | ; |
| 19673 | 215.771377563477 | 0.02 | 1 |   |
| ;     |                  |      |   |   |
| 19674 | 215.775192260742 | 0.04 | 1 |   |
| ;     |                  |      |   |   |
| 19675 | 215.767456054688 | 0.03 | 1 |   |
| ;     |                  |      |   |   |
| 19676 | 222.501968383789 | 0.00 | 1 |   |
| ;     |                  |      |   |   |
| 19677 | 222.517578125    | 0.03 | 1 | ; |

|       |                  |      |   |   |
|-------|------------------|------|---|---|
| 19678 | 222.238952636719 | 0.01 | 1 |   |
| ;     |                  |      |   |   |
| 19679 | 222.246276855469 | 0.01 | 1 |   |
| ;     |                  |      |   |   |
| 19680 | 200              | 0.04 | 1 | ; |
| 19681 | 200              | 0.06 | 1 | ; |
| 19682 | 200.494842529297 | 0.09 | 1 |   |
| ;     |                  |      |   |   |
| 19683 | 200.493865966797 | 0.03 | 1 |   |
| ;     |                  |      |   |   |
| 19684 | 229.312103271484 | 0.03 | 1 |   |
| ;     |                  |      |   |   |
| 19685 | 229.318328857422 | 0.02 | 1 |   |
| ;     |                  |      |   |   |
| 19686 | 233.68684387207  | 0.09 | 1 | ; |
| 19687 | 233.705291748047 | 0.04 | 1 |   |
| ;     |                  |      |   |   |
| 19688 | 206.935836791992 | 0.02 | 1 |   |
| ;     |                  |      |   |   |
| 19689 | 207.174774169922 | 0.00 | 1 |   |
| ;     |                  |      |   |   |
| 19690 | 209.243637084961 | 0.02 | 1 |   |
| ;     |                  |      |   |   |
| 19691 | 209.241073608398 | 0.03 | 1 |   |
| ;     |                  |      |   |   |
| 19692 | 208.50764465332  | 0.03 | 1 | ; |
| 19693 | 196.992141723633 | 0.06 | 1 |   |
| ;     |                  |      |   |   |
| 19694 | 197.039123535156 | 0.03 | 1 |   |
| ;     |                  |      |   |   |
| 19695 | 197.265548706055 | 0.01 | 1 |   |
| ;     |                  |      |   |   |
| 19696 | 198.403533935547 | 0.01 | 1 |   |
| ;     |                  |      |   |   |
| 19697 | 195.999984741211 | 0.01 | 1 |   |
| ;     |                  |      |   |   |
| 19698 | 197.748779296875 | 0.01 | 1 |   |
| ;     |                  |      |   |   |
| 19699 | 219.909362792969 | 0.01 | 1 |   |
| ;     |                  |      |   |   |
| 19700 | 220.455139160156 | 0.02 | 1 |   |
| ;     |                  |      |   |   |
| 19701 | 220.388046264648 | 0.02 | 1 |   |
| ;     |                  |      |   |   |
| 19702 | 197.99658203125  | 0.00 | 1 | ; |
| 19703 | 198.056243896484 | 0.00 | 1 |   |
| ;     |                  |      |   |   |
| 19704 | 198.071258544922 | 0.05 | 1 |   |
| ;     |                  |      |   |   |
| 19705 | 198.563858032227 | 0.02 | 1 |   |

|       |                  |      |   |   |   |
|-------|------------------|------|---|---|---|
| ;     |                  |      |   |   |   |
| 19706 | 198.437362670898 | 0.02 |   | 1 |   |
| ;     |                  |      |   |   |   |
| 19707 | 198.538497924805 | 0.01 |   | 1 |   |
| ;     |                  |      |   |   |   |
| 19708 | 197.985961914063 | 0.01 |   | 1 |   |
| ;     |                  |      |   |   |   |
| 19709 | 207.086196899414 | 0.00 |   | 1 |   |
| ;     |                  |      |   |   |   |
| 19710 | 207.806121826172 | 0.00 |   | 1 |   |
| ;     |                  |      |   |   |   |
| 19711 | 207.435073852539 | 0.01 |   | 1 |   |
| ;     |                  |      |   |   |   |
| 19712 | 208.252456665039 | 0.01 |   | 1 |   |
| ;     |                  |      |   |   |   |
| 19713 | 210.492233276367 | 0.02 |   | 1 |   |
| ;     |                  |      |   |   |   |
| 19714 | 218.700866699219 | 0.01 |   | 1 |   |
| ;     |                  |      |   |   |   |
| 19715 | 218.56071472168  | 0.01 | 1 |   | ; |
| 19716 | 218.420639038086 | 0.01 |   | 1 |   |
| ;     |                  |      |   |   |   |
| 19717 | 218.711959838867 | 0.01 |   | 1 |   |
| ;     |                  |      |   |   |   |
| 19718 | 208.391220092773 | 0.00 |   | 1 |   |
| ;     |                  |      |   |   |   |
| 19719 | 208.348693847656 | 0.07 |   | 1 |   |
| ;     |                  |      |   |   |   |
| 19720 | 201.287490844727 | 0.00 |   | 1 |   |
| ;     |                  |      |   |   |   |
| 19721 | 202.301345825195 | 0.02 |   | 1 |   |
| ;     |                  |      |   |   |   |
| 19722 | 203.087829589844 | 0.03 |   | 1 |   |
| ;     |                  |      |   |   |   |
| 19723 | 200.947677612305 | 0.08 |   | 1 |   |
| ;     |                  |      |   |   |   |
| 19724 | 200              | 0.15 | 1 |   | ; |
| 19725 | 205              | 0.01 | 1 |   | ; |
| 19726 | 194.508682250977 | 0.01 |   | 1 |   |
| ;     |                  |      |   |   |   |
| 19727 | 194.524490356445 | 0.01 |   | 1 |   |
| ;     |                  |      |   |   |   |
| 19728 | 194.669143676758 | 0.01 |   | 1 |   |
| ;     |                  |      |   |   |   |
| 19729 | 206.850296020508 | 0.01 |   | 1 |   |
| ;     |                  |      |   |   |   |
| 19730 | 208.336380004883 | 0.16 |   | 1 |   |
| ;     |                  |      |   |   |   |
| 19731 | 208.301452636719 | 0.00 |   | 1 |   |
| ;     |                  |      |   |   |   |

|       |                  |      |   |   |
|-------|------------------|------|---|---|
| 19732 | 198.987274169922 | 0.01 | 1 |   |
| ;     |                  |      |   |   |
| 19733 | 198.392181396484 | 0.02 | 1 |   |
| ;     |                  |      |   |   |
| 19734 | 198.376358032227 | 0.01 | 1 |   |
| ;     |                  |      |   |   |
| 19735 | 198.974212646484 | 0.01 | 1 |   |
| ;     |                  |      |   |   |
| 19736 | 199.209625244141 | 0.02 | 1 |   |
| ;     |                  |      |   |   |
| 19737 | 199.777481079102 | 0.08 | 1 |   |
| ;     |                  |      |   |   |
| 19738 | 199.834136962891 | 0.01 | 1 |   |
| ;     |                  |      |   |   |
| 19739 | 199.951950073242 | 0.03 | 1 |   |
| ;     |                  |      |   |   |
| 19740 | 200              | 0.01 | 1 |   |
| 19741 | 196.086456298828 | 0.05 | 1 | ; |
| ;     |                  |      |   |   |
| 19742 | 196.184341430664 | 0.00 | 1 |   |
| ;     |                  |      |   |   |
| 19743 | 215.655471801758 | 0.01 | 1 |   |
| ;     |                  |      |   |   |
| 19744 | 215.293197631836 | 0.00 | 1 |   |
| ;     |                  |      |   |   |
| 19745 | 215.698440551758 | 0.00 | 1 |   |
| ;     |                  |      |   |   |
| 19746 | 215.809982299805 | 0.01 | 1 |   |
| ;     |                  |      |   |   |
| 19747 | 217.820175170898 | 0.04 | 1 |   |
| ;     |                  |      |   |   |
| 19748 | 217.421630859375 | 0.01 | 1 |   |
| ;     |                  |      |   |   |
| 19749 | 216.152816772461 | 0.03 | 1 |   |
| ;     |                  |      |   |   |
| 19750 | 215.841659545898 | 0.04 | 1 |   |
| ;     |                  |      |   |   |
| 19751 | 215.846694946289 | 0.02 | 1 |   |
| ;     |                  |      |   |   |
| 19752 | 216.829330444336 | 0.02 | 1 |   |
| ;     |                  |      |   |   |
| 19753 | 217.352569580078 | 0.01 | 1 |   |
| ;     |                  |      |   |   |
| 19754 | 216.975280761719 | 0.02 | 1 |   |
| ;     |                  |      |   |   |
| 19755 | 210.754837036133 | 0.05 | 1 |   |
| ;     |                  |      |   |   |
| 19756 | 211.201293945313 | 0.05 | 1 |   |
| ;     |                  |      |   |   |
| 19757 | 212.124404907227 | 0.05 | 1 |   |



|       |                      |      |   |   |   |
|-------|----------------------|------|---|---|---|
| ;     |                      |      |   |   |   |
| 19758 | 212.433349609375     | 0.05 |   | 1 |   |
| ;     |                      |      |   |   |   |
| 19759 | 212.03532409668 0.01 |      | 1 |   | ; |
| 19760 | 211.946823120117     | 0.03 |   | 1 |   |
| ;     |                      |      |   |   |   |
| 19761 | 216.266555786133     | 0.00 |   | 1 |   |
| ;     |                      |      |   |   |   |
| 19762 | 216.411315917969     | 0.01 |   | 1 |   |
| ;     |                      |      |   |   |   |
| 19763 | 216.37629699707 0.00 |      | 1 |   | ; |
| 19764 | 216.886779785156     | 0.02 |   | 1 |   |
| ;     |                      |      |   |   |   |
| 19765 | 196.937454223633     | 0.04 |   | 1 |   |
| ;     |                      |      |   |   |   |
| 19766 | 196.835906982422     | 0.00 |   | 1 |   |
| ;     |                      |      |   |   |   |
| 19767 | 199.480850219727     | 0.06 |   | 1 |   |
| ;     |                      |      |   |   |   |
| 19768 | 206.646987915039     | 0.02 |   | 1 |   |
| ;     |                      |      |   |   |   |
| 19769 | 207.10514831543 0.04 |      | 1 |   | ; |
| 19770 | 207.359405517578     | 0.02 |   | 1 |   |
| ;     |                      |      |   |   |   |
| 19771 | 206.107345581055     | 0.01 |   | 1 |   |
| ;     |                      |      |   |   |   |
| 19772 | 202.341949462891     | 0.01 |   | 1 |   |
| ;     |                      |      |   |   |   |
| 19773 | 201.901992797852     | 0.01 |   | 1 |   |
| ;     |                      |      |   |   |   |
| 19774 | 208.26789855957 0.01 |      | 1 |   | ; |
| 19775 | 217.477935791016     | 0.01 |   | 1 |   |
| ;     |                      |      |   |   |   |
| 19776 | 197.354705810547     | 0.00 |   | 1 |   |
| ;     |                      |      |   |   |   |
| 19777 | 197.343322753906     | 0.00 |   | 1 |   |
| ;     |                      |      |   |   |   |
| 19778 | 198.77473449707 0.00 |      | 1 |   | ; |
| 19779 | 198.994445800781     | 0.00 |   | 1 |   |
| ;     |                      |      |   |   |   |
| 19780 | 196.963500976563     | 0.05 |   | 1 |   |
| ;     |                      |      |   |   |   |
| 19781 | 197.568923950195     | 0.04 |   | 1 |   |
| ;     |                      |      |   |   |   |
| 19782 | 199.560562133789     | 0.02 |   | 1 |   |
| ;     |                      |      |   |   |   |
| 19783 | 199.568939208984     | 0.05 |   | 1 |   |
| ;     |                      |      |   |   |   |
| 19784 | 198.62190246582 0.02 |      | 1 |   | ; |
| 19785 | 198.41877746582 0.01 |      | 1 |   | ; |

|       |                  |      |   |   |
|-------|------------------|------|---|---|
| 19786 | 205.611053466797 | 0.01 | 1 |   |
| ;     |                  |      |   |   |
| 19787 | 206.302612304687 | 0.03 | 1 |   |
| ;     |                  |      |   |   |
| 19788 | 199.128799438477 | 0.02 | 1 |   |
| ;     |                  |      |   |   |
| 19789 | 199.476425170898 | 0.02 | 1 |   |
| ;     |                  |      |   |   |
| 19790 | 198.223892211914 | 0.01 | 1 |   |
| ;     |                  |      |   |   |
| 19791 | 198.249862670898 | 0.01 | 1 |   |
| ;     |                  |      |   |   |
| 19792 | 197.664855957031 | 0.03 | 1 |   |
| ;     |                  |      |   |   |
| 19793 | 197.272827148438 | 0.02 | 1 |   |
| ;     |                  |      |   |   |
| 19794 | 197.952285766602 | 0.03 | 1 |   |
| ;     |                  |      |   |   |
| 19795 | 207.769790649414 | 0.00 | 1 |   |
| ;     |                  |      |   |   |
| 19796 | 207.143432617188 | 0.01 | 1 |   |
| ;     |                  |      |   |   |
| 19797 | 207.463882446289 | 0.01 | 1 |   |
| ;     |                  |      |   |   |
| 19798 | 194.202163696289 | 0.00 | 1 |   |
| ;     |                  |      |   |   |
| 19799 | 194.28791809082  | 0.00 | 1 |   |
| 19800 | 209.290283203125 | 0.02 | 1 | ; |
| ;     |                  |      |   |   |
| 19801 | 209.357574462891 | 0.02 | 1 |   |
| ;     |                  |      |   |   |
| 19802 | 215.004837036133 | 0.01 | 1 |   |
| ;     |                  |      |   |   |
| 19803 | 215.062850952148 | 0.11 | 1 |   |
| ;     |                  |      |   |   |
| 19804 | 191.599487304688 | 0.02 | 1 |   |
| ;     |                  |      |   |   |
| 19805 | 191.804107666016 | 0.03 | 1 |   |
| ;     |                  |      |   |   |
| 19806 | 208.369354248047 | 0.02 | 1 |   |
| ;     |                  |      |   |   |
| 19807 | 207.738235473633 | 0.03 | 1 |   |
| ;     |                  |      |   |   |
| 19808 | 210.688690185547 | 0.05 | 1 |   |
| ;     |                  |      |   |   |
| 19809 | 211.28742980957  | 0.04 | 1 |   |
| 19810 | 213.137649536133 | 0.13 | 1 | ; |
| ;     |                  |      |   |   |
| 19811 | 211.354797363281 | 0.12 | 1 |   |
| ;     |                  |      |   |   |

|       |                  |      |   |   |
|-------|------------------|------|---|---|
| 19812 | 211.965270996094 | 0.05 | 1 |   |
| ;     |                  |      |   |   |
| 19813 | 206.313766479492 | 0.03 | 1 |   |
| ;     |                  |      |   |   |
| 19814 | 206.605438232422 | 0.00 | 1 |   |
| ;     |                  |      |   |   |
| 19815 | 208.122344970703 | 0.07 | 1 |   |
| ;     |                  |      |   |   |
| 19816 | 208.108840942383 | 0.00 | 1 |   |
| ;     |                  |      |   |   |
| 19817 | 206.461975097656 | 0.06 | 1 |   |
| ;     |                  |      |   |   |
| 19818 | 206.527221679687 | 0.00 | 1 |   |
| ;     |                  |      |   |   |
| 19819 | 208.353378295898 | 0.01 | 1 |   |
| ;     |                  |      |   |   |
| 19820 | 214.707229614258 | 0.03 | 1 |   |
| ;     |                  |      |   |   |
| 19821 | 194.37239074707  | 0.00 | 1 |   |
| 19822 | 198.771545410156 | 0.02 | 1 | ; |
| ;     |                  |      |   |   |
| 19823 | 215.274429321289 | 0.03 | 1 |   |
| ;     |                  |      |   |   |
| 19824 | 215.570892333984 | 0.04 | 1 |   |
| ;     |                  |      |   |   |
| 19825 | 216.442520141602 | 0.01 | 1 |   |
| ;     |                  |      |   |   |
| 19826 | 216.666961669922 | 0.04 | 1 |   |
| ;     |                  |      |   |   |
| 19827 | 217.413208007813 | 0.04 | 1 |   |
| ;     |                  |      |   |   |
| 19828 | 217.330184936523 | 0.01 | 1 |   |
| ;     |                  |      |   |   |
| 19829 | 217.392776489258 | 0.02 | 1 |   |
| ;     |                  |      |   |   |
| 19830 | 217.322677612305 | 0.01 | 1 |   |
| ;     |                  |      |   |   |
| 19831 | 217.76335144043  | 0.01 | 1 |   |
| 19832 | 200.742980957031 | 0.00 | 1 | ; |
| ;     |                  |      |   |   |
| 19833 | 201.112396240234 | 0.00 | 1 |   |
| ;     |                  |      |   |   |
| 19834 | 201.13330078125  | 0.01 | 1 |   |
| 19835 | 201.125518798828 | 0.00 | 1 | ; |
| ;     |                  |      |   |   |
| 19836 | 200.853561401367 | 0.00 | 1 |   |
| ;     |                  |      |   |   |
| 19837 | 213.112930297852 | 0.01 | 1 |   |
| ;     |                  |      |   |   |
| 19838 | 227.640350341797 | 0.00 | 1 |   |

|       |                  |      |   |   |   |
|-------|------------------|------|---|---|---|
| ;     |                  |      |   |   |   |
| 19839 | 220              | 0.02 | 1 |   | ; |
| 19840 | 220.184753417969 | 0.01 |   | 1 |   |
| ;     |                  |      |   |   |   |
| 19841 | 201.347808837891 | 0.04 |   | 1 |   |
| ;     |                  |      |   |   |   |
| 19842 | 197.767440795898 | 0.06 |   | 1 |   |
| ;     |                  |      |   |   |   |
| 19843 | 208.125122070313 | 0.07 |   | 1 |   |
| ;     |                  |      |   |   |   |
| 19844 | 208.233139038086 | 0.02 |   | 1 |   |
| ;     |                  |      |   |   |   |
| 19845 | 205.076614379883 | 0.01 |   | 1 |   |
| ;     |                  |      |   |   |   |
| 19846 | 209.039367675781 | 0.01 |   | 1 |   |
| ;     |                  |      |   |   |   |
| 19847 | 209.161209106445 | 0.01 |   | 1 |   |
| ;     |                  |      |   |   |   |
| 19848 | 209.031295776367 | 0.02 |   | 1 |   |
| ;     |                  |      |   |   |   |
| 19849 | 196.225784301758 | 0.01 |   | 1 |   |
| ;     |                  |      |   |   |   |
| 19850 | 209.574295043945 | 0.02 |   | 1 |   |
| ;     |                  |      |   |   |   |
| 19851 | 209.975875854492 | 0.05 |   | 1 |   |
| ;     |                  |      |   |   |   |
| 19852 | 211.704437255859 | 0.01 |   | 1 |   |
| ;     |                  |      |   |   |   |
| 19853 | 211.970947265625 | 0.02 |   | 1 |   |
| ;     |                  |      |   |   |   |
| 19854 | 200.69499206543  | 0.00 | 1 |   | ; |
| 19855 | 220              | 0.01 | 1 |   | ; |
| 19856 | 219.533950805664 | 0.00 |   | 1 |   |
| ;     |                  |      |   |   |   |
| 19857 | 199.638961791992 | 0.02 |   | 1 |   |
| ;     |                  |      |   |   |   |
| 19858 | 199.412963867188 | 0.01 |   | 1 |   |
| ;     |                  |      |   |   |   |
| 19859 | 201.29475402832  | 0.07 | 1 |   | ; |
| 19860 | 212.947570800781 | 0.05 |   | 1 |   |
| ;     |                  |      |   |   |   |
| 19861 | 212.92253112793  | 0.07 | 1 |   | ; |
| 19862 | 212.795074462891 | 0.02 |   | 1 |   |
| ;     |                  |      |   |   |   |
| 19863 | 212.578552246094 | 0.02 |   | 1 |   |
| ;     |                  |      |   |   |   |
| 19864 | 217.566970825195 | 0.02 |   | 1 |   |
| ;     |                  |      |   |   |   |
| 19865 | 217.770538330078 | 0.02 |   | 1 |   |
| ;     |                  |      |   |   |   |

|       |                      |      |   |   |
|-------|----------------------|------|---|---|
| 19866 | 205.346908569336     | 0.01 | 1 |   |
| ;     |                      |      |   |   |
| 19867 | 218.682434082031     | 0.01 | 1 |   |
| ;     |                      |      |   |   |
| 19868 | 203.313201904297     | 0.01 | 1 |   |
| ;     |                      |      |   |   |
| 19869 | 197.120910644531     | 0.03 | 1 |   |
| ;     |                      |      |   |   |
| 19870 | 198.622314453125     | 0.03 | 1 |   |
| ;     |                      |      |   |   |
| 19871 | 198.652236938477     | 0.02 | 1 |   |
| ;     |                      |      |   |   |
| 19872 | 213.55110168457 0.08 |      | 1 | ; |
| 19873 | 209.222549438477     | 0.01 | 1 |   |
| ;     |                      |      |   |   |
| 19874 | 214.919281005859     | 0.00 | 1 |   |
| ;     |                      |      |   |   |
| 19875 | 214.905639648438     | 0.01 | 1 |   |
| ;     |                      |      |   |   |
| 19876 | 210.15299987793 0.00 |      | 1 | ; |
| 19877 | 210.907669067383     | 0.04 | 1 |   |
| ;     |                      |      |   |   |
| 19878 | 210.893615722656     | 0.07 | 1 |   |
| ;     |                      |      |   |   |
| 19879 | 215.65495300293 0.01 |      | 1 | ; |
| 19880 | 215.655563354492     | 0.02 | 1 |   |
| ;     |                      |      |   |   |
| 19881 | 209.856140136719     | 0.02 | 1 |   |
| ;     |                      |      |   |   |
| 19882 | 209.840423583984     | 0.03 | 1 |   |
| ;     |                      |      |   |   |
| 19883 | 205.520645141602     | 0.01 | 1 |   |
| ;     |                      |      |   |   |
| 19884 | 214.017486572266     | 0.02 | 1 |   |
| ;     |                      |      |   |   |
| 19885 | 214.024230957031     | 0.02 | 1 |   |
| ;     |                      |      |   |   |
| 19886 | 214.798690795898     | 0.00 | 1 |   |
| ;     |                      |      |   |   |
| 19887 | 214.786178588867     | 0.04 | 1 |   |
| ;     |                      |      |   |   |
| 19888 | 215.162292480469     | 0.02 | 1 |   |
| ;     |                      |      |   |   |
| 19889 | 215.153961181641     | 0.03 | 1 |   |
| ;     |                      |      |   |   |
| 19890 | 214.678253173828     | 0.02 | 1 |   |
| ;     |                      |      |   |   |
| 19891 | 214.685546875 0.02   |      | 1 | ; |
| 19892 | 213.013977050781     | 0.01 | 1 |   |
| ;     |                      |      |   |   |

|       |                  |      |   |   |
|-------|------------------|------|---|---|
| 19893 | 213.021850585938 | 0.12 | 1 |   |
| ;     |                  |      |   |   |
| 19894 | 202.495590209961 | 0.01 | 1 |   |
| ;     |                  |      |   |   |
| 19895 | 202.496856689453 | 0.01 | 1 |   |
| ;     |                  |      |   |   |
| 19896 | 194.125503540039 | 0.02 | 1 |   |
| ;     |                  |      |   |   |
| 19897 | 194.121185302734 | 0.03 | 1 |   |
| ;     |                  |      |   |   |
| 19898 | 193.914138793945 | 0.05 | 1 |   |
| ;     |                  |      |   |   |
| 19899 | 195.157653808594 | 0.00 | 1 |   |
| ;     |                  |      |   |   |
| 19900 | 196.16796875     | 0.00 | 1 | ; |
| 19901 | 198.085510253906 | 0.00 | 1 |   |
| ;     |                  |      |   |   |
| 19902 | 199.202178955078 | 0.00 | 1 |   |
| ;     |                  |      |   |   |
| 19903 | 199.182983398437 | 0.00 | 1 |   |
| ;     |                  |      |   |   |
| 19904 | 196.193939208984 | 0.04 | 1 |   |
| ;     |                  |      |   |   |
| 19905 | 203.627838134766 | 0.01 | 1 |   |
| ;     |                  |      |   |   |
| 19906 | 203.635559082031 | 0.00 | 1 |   |
| ;     |                  |      |   |   |
| 19907 | 200.693115234375 | 0.00 | 1 |   |
| ;     |                  |      |   |   |
| 19908 | 200.486251831055 | 0.04 | 1 |   |
| ;     |                  |      |   |   |
| 19909 | 200.477661132813 | 0.03 | 1 |   |
| ;     |                  |      |   |   |
| 19910 | 200.822982788086 | 0.03 | 1 |   |
| ;     |                  |      |   |   |
| 19911 | 200.814697265625 | 0.01 | 1 |   |
| ;     |                  |      |   |   |
| 19912 | 200.209228515625 | 0.02 | 1 |   |
| ;     |                  |      |   |   |
| 19913 | 200.197387695312 | 0.01 | 1 |   |
| ;     |                  |      |   |   |
| 19914 | 200.220932006836 | 0.00 | 1 |   |
| ;     |                  |      |   |   |
| 19915 | 204.820266723633 | 0.02 | 1 |   |
| ;     |                  |      |   |   |
| 19916 | 203.213485717773 | 0.02 | 1 |   |
| ;     |                  |      |   |   |
| 19917 | 205              | 0.02 | 1 | ; |
| 19918 | 205              | 0.01 | 1 | ; |
| 19919 | 212.466644287109 | 0.01 | 1 |   |

|       |                  |      |   |   |   |
|-------|------------------|------|---|---|---|
| ;     |                  |      |   |   |   |
| 19920 | 212.21630859375  | 0.03 | 1 |   | ; |
| 19921 | 212.107452392578 | 0.02 |   | 1 |   |
| ;     |                  |      |   |   |   |
| 19922 | 199.452087402344 | 0.04 |   | 1 |   |
| ;     |                  |      |   |   |   |
| 19923 | 199.041076660156 | 0.01 |   | 1 |   |
| ;     |                  |      |   |   |   |
| 19924 | 199.689697265625 | 0.05 |   | 1 |   |
| ;     |                  |      |   |   |   |
| 19925 | 199.728546142578 | 0.04 |   | 1 |   |
| ;     |                  |      |   |   |   |
| 19926 | 195.653427124023 | 0.02 |   | 1 |   |
| ;     |                  |      |   |   |   |
| 19927 | 195.905563354492 | 0.02 |   | 1 |   |
| ;     |                  |      |   |   |   |
| 19928 | 206.023773193359 | 0.03 |   | 1 |   |
| ;     |                  |      |   |   |   |
| 19929 | 207.239837646484 | 0.01 |   | 1 |   |
| ;     |                  |      |   |   |   |
| 19930 | 207.051086425781 | 0.01 |   | 1 |   |
| ;     |                  |      |   |   |   |
| 19931 | 207.35807800293  | 0.03 | 1 |   | ; |
| 19932 | 207.235321044922 | 0.06 |   | 1 |   |
| ;     |                  |      |   |   |   |
| 19933 | 209.686645507813 | 0.01 |   | 1 |   |
| ;     |                  |      |   |   |   |
| 19934 | 208.645721435547 | 0.04 |   | 1 |   |
| ;     |                  |      |   |   |   |
| 19935 | 208.345581054688 | 0.06 |   | 1 |   |
| ;     |                  |      |   |   |   |
| 19936 | 207.943862915039 | 0.04 |   | 1 |   |
| ;     |                  |      |   |   |   |
| 19937 | 208.170318603516 | 0.02 |   | 1 |   |
| ;     |                  |      |   |   |   |
| 19938 | 208.470001220703 | 0.03 |   | 1 |   |
| ;     |                  |      |   |   |   |
| 19939 | 209.582321166992 | 0.03 |   | 1 |   |
| ;     |                  |      |   |   |   |
| 19940 | 209.013168334961 | 0.01 |   | 1 |   |
| ;     |                  |      |   |   |   |
| 19941 | 197.942459106445 | 0.03 |   | 1 |   |
| ;     |                  |      |   |   |   |
| 19942 | 219.975784301758 | 0.02 |   | 1 |   |
| ;     |                  |      |   |   |   |
| 19943 | 197.316879272461 | 0.07 |   | 1 |   |
| ;     |                  |      |   |   |   |
| 19944 | 195.76676940918  | 0.05 | 1 |   | ; |
| 19945 | 198.385238647461 | 0.06 |   | 1 |   |
| ;     |                  |      |   |   |   |

|       |                  |      |   |   |  |  |
|-------|------------------|------|---|---|--|--|
| 19946 | 197.49153137207  | 0.02 | 1 |   |  |  |
| 19947 | 198.790237426758 | 0.02 |   | 1 |  |  |
| ;     |                  |      |   |   |  |  |
| 19948 | 200.882583618164 | 0.01 |   | 1 |  |  |
| ;     |                  |      |   |   |  |  |
| 19949 | 200.166030883789 | 0.03 |   | 1 |  |  |
| ;     |                  |      |   |   |  |  |
| 19950 | 201.103622436523 | 0.01 |   | 1 |  |  |
| ;     |                  |      |   |   |  |  |
| 19951 | 201.354797363281 | 0.03 |   | 1 |  |  |
| ;     |                  |      |   |   |  |  |
| 19952 | 200.967391967773 | 0.04 |   | 1 |  |  |
| ;     |                  |      |   |   |  |  |
| 19953 | 201.915954589844 | 0.03 |   | 1 |  |  |
| ;     |                  |      |   |   |  |  |
| 19954 | 200.477020263672 | 0.01 |   | 1 |  |  |
| ;     |                  |      |   |   |  |  |
| 19955 | 198.136596679688 | 0.02 |   | 1 |  |  |
| ;     |                  |      |   |   |  |  |
| 19956 | 198.552505493164 | 0.02 |   | 1 |  |  |
| ;     |                  |      |   |   |  |  |
| 19957 | 196.368591308594 | 0.00 |   | 1 |  |  |
| ;     |                  |      |   |   |  |  |
| 19958 | 196.44384765625  | 0.07 | 1 |   |  |  |
| 19959 | 196.027359008789 | 0.03 |   | 1 |  |  |
| ;     |                  |      |   |   |  |  |
| 19960 | 196.001983642578 | 0.03 |   | 1 |  |  |
| ;     |                  |      |   |   |  |  |
| 19961 | 199.755508422852 | 0.07 |   | 1 |  |  |
| ;     |                  |      |   |   |  |  |
| 19962 | 201.116241455078 | 0.07 |   | 1 |  |  |
| ;     |                  |      |   |   |  |  |
| 19963 | 201.026000976563 | 0.03 |   | 1 |  |  |
| ;     |                  |      |   |   |  |  |
| 19964 | 201.199935913086 | 0.04 |   | 1 |  |  |
| ;     |                  |      |   |   |  |  |
| 19965 | 200.089096069336 | 0.00 |   | 1 |  |  |
| ;     |                  |      |   |   |  |  |
| 19966 | 199.358856201172 | 0.02 |   | 1 |  |  |
| ;     |                  |      |   |   |  |  |
| 19967 | 198.786041259766 | 0.03 |   | 1 |  |  |
| ;     |                  |      |   |   |  |  |
| 19968 | 198.301513671875 | 0.03 |   | 1 |  |  |
| ;     |                  |      |   |   |  |  |
| 19969 | 198.796356201172 | 0.03 |   | 1 |  |  |
| ;     |                  |      |   |   |  |  |
| 19970 | 193.664047241211 | 0.00 |   | 1 |  |  |
| ;     |                  |      |   |   |  |  |
| 19971 | 193.711242675781 | 0.00 |   | 1 |  |  |
| ;     |                  |      |   |   |  |  |



|       |                  |      |   |   |
|-------|------------------|------|---|---|
| 19972 | 225.826873779297 | 0.00 | 1 |   |
| ;     |                  |      |   |   |
| 19973 | 225.717559814453 | 0.00 | 1 |   |
| ;     |                  |      |   |   |
| 19974 | 199.559997558594 | 0.06 | 1 |   |
| ;     |                  |      |   |   |
| 19975 | 197.822128295898 | 0.06 | 1 |   |
| ;     |                  |      |   |   |
| 19976 | 199.660568237305 | 0.12 | 1 |   |
| ;     |                  |      |   |   |
| 19977 | 196.284103393555 | 0.12 | 1 |   |
| ;     |                  |      |   |   |
| 19978 | 198.639221191406 | 0.03 | 1 |   |
| ;     |                  |      |   |   |
| 19979 | 196.646820068359 | 0.02 | 1 |   |
| ;     |                  |      |   |   |
| 19980 | 210.926315307617 | 0.03 | 1 |   |
| ;     |                  |      |   |   |
| 19981 | 210.469680786133 | 0.04 | 1 |   |
| ;     |                  |      |   |   |
| 19982 | 218.23828125     | 0.02 | 1 |   |
| 19983 | 218.750335693359 | 0.02 | 1 | ; |
| ;     |                  |      |   |   |
| 19984 | 217.715377807617 | 0.02 | 1 |   |
| ;     |                  |      |   |   |
| 19985 | 214.688201904297 | 0.02 | 1 |   |
| ;     |                  |      |   |   |
| 19986 | 213.786834716797 | 0.02 | 1 |   |
| ;     |                  |      |   |   |
| 19987 | 214.496673583984 | 0.12 | 1 |   |
| ;     |                  |      |   |   |
| 19988 | 214.624359130859 | 0.11 | 1 |   |
| ;     |                  |      |   |   |
| 19989 | 193.959106445313 | 0.02 | 1 |   |
| ;     |                  |      |   |   |
| 19990 | 207.939697265625 | 0.01 | 1 |   |
| ;     |                  |      |   |   |
| 19991 | 207.211288452148 | 0.03 | 1 |   |
| ;     |                  |      |   |   |
| 19992 | 206.016357421875 | 0.01 | 1 |   |
| ;     |                  |      |   |   |
| 19993 | 205.639389038086 | 0.02 | 1 |   |
| ;     |                  |      |   |   |
| 19994 | 207.249359130859 | 0.03 | 1 |   |
| ;     |                  |      |   |   |
| 19995 | 197.315734863281 | 0.01 | 1 |   |
| ;     |                  |      |   |   |
| 19996 | 197.358764648438 | 0.01 | 1 |   |
| ;     |                  |      |   |   |
| 19997 | 209.549194335938 | 0.01 | 1 |   |

|       |                  |      |   |   |   |
|-------|------------------|------|---|---|---|
| ;     |                  |      |   |   |   |
| 19998 | 194.885589599609 | 0.05 |   | 1 |   |
| ;     |                  |      |   |   |   |
| 19999 | 195.568954467773 | 0.05 |   | 1 |   |
| ;     |                  |      |   |   |   |
| 20000 | 197.307479858398 | 0.03 |   | 1 |   |
| ;     |                  |      |   |   |   |
| 20001 | 200.921813964844 | 0.01 |   | 1 |   |
| ;     |                  |      |   |   |   |
| 20002 | 200.9345703125   | 0.01 | 1 |   | ; |
| 20003 | 200.698501586914 | 0.02 |   | 1 |   |
| ;     |                  |      |   |   |   |
| 20004 | 200.706878662109 | 0.01 |   | 1 |   |
| ;     |                  |      |   |   |   |
| 20005 | 199.299774169922 | 0.00 |   | 1 |   |
| ;     |                  |      |   |   |   |
| 20006 | 206.086654663086 | 0.00 |   | 1 |   |
| ;     |                  |      |   |   |   |
| 20007 | 195.714721679688 | 0.02 |   | 1 |   |
| ;     |                  |      |   |   |   |
| 20008 | 206.856536865234 | 0.02 |   | 1 |   |
| ;     |                  |      |   |   |   |
| 20009 | 206.99382019043  | 0.01 | 1 |   | ; |
| 20010 | 206.609161376953 | 0.00 |   | 1 |   |
| ;     |                  |      |   |   |   |
| 20011 | 206.652038574219 | 0.01 |   | 1 |   |
| ;     |                  |      |   |   |   |
| 20012 | 196.930282592773 | 0.03 |   | 1 |   |
| ;     |                  |      |   |   |   |
| 20013 | 215.018783569336 | 0.01 |   | 1 |   |
| ;     |                  |      |   |   |   |
| 20014 | 216.321792602539 | 0.08 |   | 1 |   |
| ;     |                  |      |   |   |   |
| 20015 | 215.740692138672 | 0.04 |   | 1 |   |
| ;     |                  |      |   |   |   |
| 20016 | 215.741424560547 | 0.01 |   | 1 |   |
| ;     |                  |      |   |   |   |
| 20017 | 209.479766845703 | 0.03 |   | 1 |   |
| ;     |                  |      |   |   |   |
| 20018 | 209.359069824219 | 0.03 |   | 1 |   |
| ;     |                  |      |   |   |   |
| 20019 | 209.923568725586 | 0.01 |   | 1 |   |
| ;     |                  |      |   |   |   |
| 20020 | 211.039001464844 | 0.01 |   | 1 |   |
| ;     |                  |      |   |   |   |
| 20021 | 211.536682128906 | 0.00 |   | 1 |   |
| ;     |                  |      |   |   |   |
| 20022 | 200              | 0.00 | 1 |   | ; |
| 20023 | 199.194778442383 | 0.01 |   | 1 |   |
| ;     |                  |      |   |   |   |

|       |                  |      |   |   |
|-------|------------------|------|---|---|
| 20024 | 227.056381225586 | 0.00 | 1 |   |
| ;     |                  |      |   |   |
| 20025 | 227.070281982422 | 0.04 | 1 |   |
| ;     |                  |      |   |   |
| 20026 | 221.20426940918  | 0.05 | 1 | ; |
| 20027 | 221.212387084961 | 0.00 | 1 |   |
| ;     |                  |      |   |   |
| 20028 | 222.413864135742 | 0.01 | 1 |   |
| ;     |                  |      |   |   |
| 20029 | 222.433364868164 | 0.02 | 1 |   |
| ;     |                  |      |   |   |
| 20030 | 222.394302368164 | 0.02 | 1 |   |
| ;     |                  |      |   |   |
| 20031 | 220.867095947266 | 0.01 | 1 |   |
| ;     |                  |      |   |   |
| 20032 | 220.849502563477 | 0.01 | 1 |   |
| ;     |                  |      |   |   |
| 20033 | 220.687576293945 | 0.01 | 1 |   |
| ;     |                  |      |   |   |
| 20034 | 220.701126098633 | 0.01 | 1 |   |
| ;     |                  |      |   |   |
| 20035 | 222.598388671875 | 0.02 | 1 |   |
| ;     |                  |      |   |   |
| 20036 | 222.609085083008 | 0.01 | 1 |   |
| ;     |                  |      |   |   |
| 20037 | 222.689865112305 | 0.01 | 1 |   |
| ;     |                  |      |   |   |
| 20038 | 222.679061889648 | 0.00 | 1 |   |
| ;     |                  |      |   |   |
| 20039 | 227.944198608398 | 0.01 | 1 |   |
| ;     |                  |      |   |   |
| 20040 | 230.009796142578 | 0.01 | 1 |   |
| ;     |                  |      |   |   |
| 20041 | 231.516891479492 | 0.00 | 1 |   |
| ;     |                  |      |   |   |
| 20042 | 196.043930053711 | 0.01 | 1 |   |
| ;     |                  |      |   |   |
| 20043 | 196.083587646484 | 0.02 | 1 |   |
| ;     |                  |      |   |   |
| 20044 | 196.808441162109 | 0.02 | 1 |   |
| ;     |                  |      |   |   |
| 20045 | 191.648376464844 | 0.01 | 1 |   |
| ;     |                  |      |   |   |
| 20046 | 191.651290893555 | 0.03 | 1 |   |
| ;     |                  |      |   |   |
| 20047 | 204.423141479492 | 0.04 | 1 |   |
| ;     |                  |      |   |   |
| 20048 | 204.441482543945 | 0.01 | 1 |   |
| ;     |                  |      |   |   |
| 20049 | 204.392639160156 | 0.00 | 1 |   |

|       |                  |      |   |
|-------|------------------|------|---|
| ;     |                  |      |   |
| 20050 | 205.125289916992 | 0.02 | 1 |
| ;     |                  |      |   |
| 20051 | 205.138687133789 | 0.01 | 1 |
| ;     |                  |      |   |
| 20052 | 196.272766113281 | 0.02 | 1 |
| ;     |                  |      |   |
| 20053 | 196.287933349609 | 0.04 | 1 |
| ;     |                  |      |   |
| 20054 | 211.516067504883 | 0.04 | 1 |
| ;     |                  |      |   |
| 20055 | 211.526336669922 | 0.02 | 1 |
| ;     |                  |      |   |
| 20056 | 211.211685180664 | 0.03 | 1 |
| ;     |                  |      |   |
| 20057 | 208.380447387695 | 0.05 | 1 |
| ;     |                  |      |   |
| 20058 | 208.388259887695 | 0.02 | 1 |
| ;     |                  |      |   |
| 20059 | 208.554122924805 | 0.00 | 1 |
| ;     |                  |      |   |
| 20060 | 209.108764648438 | 0.14 | 1 |
| ;     |                  |      |   |
| 20061 | 219.998840332031 | 0.02 | 1 |
| ;     |                  |      |   |
| 20062 | 220.138168334961 | 0.02 | 1 |
| ;     |                  |      |   |
| 20063 | 219.796356201172 | 0.02 | 1 |
| ;     |                  |      |   |
| 20064 | 220.915222167969 | 0.01 | 1 |
| ;     |                  |      |   |
| 20065 | 220.981597900391 | 0.00 | 1 |
| ;     |                  |      |   |
| 20066 | 218.623886108398 | 0.02 | 1 |
| ;     |                  |      |   |
| 20067 | 218.440673828125 | 0.02 | 1 |
| ;     |                  |      |   |
| 20068 | 225.532684326172 | 0.00 | 1 |
| ;     |                  |      |   |
| 20069 | 225.347640991211 | 0.00 | 1 |
| ;     |                  |      |   |
| 20070 | 226.385711669922 | 0.04 | 1 |
| ;     |                  |      |   |
| 20071 | 226.861999511719 | 0.02 | 1 |
| ;     |                  |      |   |
| 20072 | 226.876968383789 | 0.02 | 1 |
| ;     |                  |      |   |
| 20073 | 202.953018188477 | 0.04 | 1 |
| ;     |                  |      |   |
| 20074 | 219.606994628906 | 0.03 | 1 |

|       |                  |      |   |  |
|-------|------------------|------|---|--|
| ;     |                  |      |   |  |
| 20075 | 219.926086425781 | 0.04 | 1 |  |
| ;     |                  |      |   |  |
| 20076 | 210.161773681641 | 0.01 | 1 |  |
| ;     |                  |      |   |  |
| 20077 | 210.176956176758 | 0.00 | 1 |  |
| ;     |                  |      |   |  |
| 20078 | 210.441558837891 | 0.01 | 1 |  |
| ;     |                  |      |   |  |
| 20079 | 231.864486694336 | 0.04 | 1 |  |
| ;     |                  |      |   |  |
| 20080 | 232.169479370117 | 0.04 | 1 |  |
| ;     |                  |      |   |  |
| 20081 | 225.346237182617 | 0.00 | 1 |  |
| ;     |                  |      |   |  |
| 20082 | 225.307723999023 | 0.04 | 1 |  |
| ;     |                  |      |   |  |
| 20083 | 204.222839355469 | 0.04 | 1 |  |
| ;     |                  |      |   |  |
| 20084 | 204.692123413086 | 0.04 | 1 |  |
| ;     |                  |      |   |  |
| 20085 | 203.684875488281 | 0.07 | 1 |  |
| ;     |                  |      |   |  |
| 20086 | 197.422027587891 | 0.01 | 1 |  |
| ;     |                  |      |   |  |
| 20087 | 205.386810302734 | 0.00 | 1 |  |
| ;     |                  |      |   |  |
| 20088 | 193.021514892578 | 0.05 | 1 |  |
| ;     |                  |      |   |  |
| 20089 | 207.245651245117 | 0.02 | 1 |  |
| ;     |                  |      |   |  |
| 20090 | 207.809158325195 | 0.01 | 1 |  |
| ;     |                  |      |   |  |
| 20091 | 214.303192138672 | 0.08 | 1 |  |
| ;     |                  |      |   |  |
| 20092 | 214.337387084961 | 0.02 | 1 |  |
| ;     |                  |      |   |  |
| 20093 | 215.367324829102 | 0.01 | 1 |  |
| ;     |                  |      |   |  |
| 20094 | 214.979537963867 | 0.03 | 1 |  |
| ;     |                  |      |   |  |
| 20095 | 214.350433349609 | 0.01 | 1 |  |
| ;     |                  |      |   |  |
| 20096 | 214.451034545898 | 0.02 | 1 |  |
| ;     |                  |      |   |  |
| 20097 | 214.817428588867 | 0.02 | 1 |  |
| ;     |                  |      |   |  |
| 20098 | 214.96337890625  | 0.02 | 1 |  |
| 20099 | 214.885864257813 | 0.02 | 1 |  |
| ;     |                  |      |   |  |

|       |                  |      |   |   |
|-------|------------------|------|---|---|
| 20100 | 215.210494995117 | 0.02 | 1 |   |
| ;     |                  |      |   |   |
| 20101 | 214.858245849609 | 0.00 | 1 |   |
| ;     |                  |      |   |   |
| 20102 | 215.117416381836 | 0.01 | 1 |   |
| ;     |                  |      |   |   |
| 20103 | 215.468551635742 | 0.02 | 1 |   |
| ;     |                  |      |   |   |
| 20104 | 215.090972900391 | 0.01 | 1 |   |
| ;     |                  |      |   |   |
| 20105 | 210.244674682617 | 0.01 | 1 |   |
| ;     |                  |      |   |   |
| 20106 | 209.839370727539 | 0.01 | 1 |   |
| ;     |                  |      |   |   |
| 20107 | 207.530212402344 | 0.01 | 1 |   |
| ;     |                  |      |   |   |
| 20108 | 207.262573242188 | 0.01 | 1 |   |
| ;     |                  |      |   |   |
| 20109 | 212.16276550293  | 0.01 | 1 |   |
| 20110 | 213.692108154297 | 0.00 | 1 | ; |
| ;     |                  |      |   |   |
| 20111 | 213.699676513672 | 0.00 | 1 |   |
| ;     |                  |      |   |   |
| 20112 | 214.182144165039 | 0.06 | 1 |   |
| ;     |                  |      |   |   |
| 20113 | 214.091995239258 | 0.05 | 1 |   |
| ;     |                  |      |   |   |
| 20114 | 217.14013671875  | 0.03 | 1 | ; |
| 20115 | 214.8916015625   | 0.03 | 1 | ; |
| 20116 | 241.903549194336 | 0.00 | 1 |   |
| ;     |                  |      |   |   |
| 20117 | 210.631637573242 | 0.01 | 1 |   |
| ;     |                  |      |   |   |
| 20118 | 210.527328491211 | 0.00 | 1 |   |
| ;     |                  |      |   |   |
| 20119 | 211.599105834961 | 0.04 | 1 |   |
| ;     |                  |      |   |   |
| 20120 | 211.903274536133 | 0.03 | 1 |   |
| ;     |                  |      |   |   |
| 20121 | 211.292175292969 | 0.03 | 1 |   |
| ;     |                  |      |   |   |
| 20122 | 203.772659301758 | 0.04 | 1 |   |
| ;     |                  |      |   |   |
| 20123 | 204.265014648438 | 0.03 | 1 |   |
| ;     |                  |      |   |   |
| 20124 | 203.739273071289 | 0.03 | 1 |   |
| ;     |                  |      |   |   |
| 20125 | 198.696594238281 | 0.01 | 1 |   |
| ;     |                  |      |   |   |
| 20126 | 205              | 0.06 | 1 | ; |

|       |                  |      |   |   |
|-------|------------------|------|---|---|
| 20127 | 233.272964477539 | 0.01 | 1 |   |
| ;     |                  |      |   |   |
| 20128 | 233.025604248047 | 0.01 | 1 |   |
| ;     |                  |      |   |   |
| 20129 | 233.128036499023 | 0.01 | 1 |   |
| ;     |                  |      |   |   |
| 20130 | 233.282180786133 | 0.01 | 1 |   |
| ;     |                  |      |   |   |
| 20131 | 233.93603515625  | 0.02 | 1 |   |
| 20132 | 234.198547363281 | 0.02 | 1 | ; |
| ;     |                  |      |   |   |
| 20133 | 219.874221801758 | 0.01 | 1 |   |
| ;     |                  |      |   |   |
| 20134 | 219.829071044922 | 0.01 | 1 |   |
| ;     |                  |      |   |   |
| 20135 | 220.541229248047 | 0.03 | 1 |   |
| ;     |                  |      |   |   |
| 20136 | 220.67057800293  | 0.00 | 1 |   |
| 20137 | 202.482940673828 | 0.03 | 1 | ; |
| ;     |                  |      |   |   |
| 20138 | 201.679443359375 | 0.02 | 1 |   |
| ;     |                  |      |   |   |
| 20139 | 229.932434082031 | 0.08 | 1 |   |
| ;     |                  |      |   |   |
| 20140 | 204.9921875      | 0.01 | 1 |   |
| 20141 | 217.966415405273 | 0.06 | 1 | ; |
| ;     |                  |      |   |   |
| 20142 | 217.825912475586 | 0.00 | 1 |   |
| ;     |                  |      |   |   |
| 20143 | 200              | 0.01 | 1 |   |
| 20144 | 205.998565673828 | 0.01 | 1 | ; |
| ;     |                  |      |   |   |
| 20145 | 206.251846313477 | 0.00 | 1 |   |
| ;     |                  |      |   |   |
| 20147 | 233.716430664063 | 0.01 | 1 |   |
| ;     |                  |      |   |   |
| 20148 | 233.815307617188 | 0.00 | 1 |   |
| ;     |                  |      |   |   |
| 20149 | 232.762542724609 | 0.05 | 1 |   |
| ;     |                  |      |   |   |
| 20150 | 233.014450073242 | 0.05 | 1 |   |
| ;     |                  |      |   |   |
| 20151 | 221.046630859375 | 0.03 | 1 |   |
| ;     |                  |      |   |   |
| 20152 | 221.31233215332  | 0.04 | 1 |   |
| 20153 | 220.523971557617 | 0.00 | 1 | ; |
| ;     |                  |      |   |   |
| 20154 | 220.114288330078 | 0.01 | 1 |   |
| ;     |                  |      |   |   |
| 20155 | 220.566299438477 | 0.02 | 1 |   |

|       |                  |      |   |   |   |
|-------|------------------|------|---|---|---|
| ;     |                  |      |   |   |   |
| 20156 | 220.653381347656 | 0.00 |   | 1 |   |
| ;     |                  |      |   |   |   |
| 20157 | 228.025909423828 | 0.01 |   | 1 |   |
| ;     |                  |      |   |   |   |
| 20158 | 228.38591003418  | 0.05 | 1 |   | ; |
| 20159 | 203.69319152832  | 0.02 | 1 |   | ; |
| 20160 | 203.140060424805 | 0.01 |   | 1 |   |
| ;     |                  |      |   |   |   |
| 20161 | 221.283279418945 | 0.00 |   | 1 |   |
| ;     |                  |      |   |   |   |
| 20162 | 221.354629516602 | 0.00 |   | 1 |   |
| ;     |                  |      |   |   |   |
| 20163 | 231.652954101563 | 0.01 |   | 1 |   |
| ;     |                  |      |   |   |   |
| 20164 | 231.742065429688 | 0.00 |   | 1 |   |
| ;     |                  |      |   |   |   |
| 20165 | 205.63410949707  | 0.04 | 1 |   | ; |
| 20166 | 205.799911499023 | 0.04 |   | 1 |   |
| ;     |                  |      |   |   |   |
| 20167 | 205.49836730957  | 0.02 | 1 |   | ; |
| 20168 | 205              | 0.04 | 1 |   | ; |
| 20169 | 205              | 0.04 | 1 |   | ; |
| 20170 | 205              | 0.03 | 1 |   | ; |
| 20171 | 204.924407958984 | 0.02 |   | 1 |   |
| ;     |                  |      |   |   |   |
| 20172 | 205.320251464844 | 0.02 |   | 1 |   |
| ;     |                  |      |   |   |   |
| 20173 | 205.414794921875 | 0.10 |   | 1 |   |
| ;     |                  |      |   |   |   |
| 20174 | 206.110778808594 | 0.00 |   | 1 |   |
| ;     |                  |      |   |   |   |
| 20175 | 206.011108398437 | 0.06 |   | 1 |   |
| ;     |                  |      |   |   |   |
| 20176 | 205.869613647461 | 0.06 |   | 1 |   |
| ;     |                  |      |   |   |   |
| 20177 | 201.219848632813 | 0.00 |   | 1 |   |
| ;     |                  |      |   |   |   |
| 20178 | 201.086303710938 | 0.00 |   | 1 |   |
| ;     |                  |      |   |   |   |
| 20179 | 233.659194946289 | 0.01 |   | 1 |   |
| ;     |                  |      |   |   |   |
| 20180 | 234.065093994141 | 0.03 |   | 1 |   |
| ;     |                  |      |   |   |   |
| 20181 | 233.726181030273 | 0.03 |   | 1 |   |
| ;     |                  |      |   |   |   |
| 20182 | 234.121856689453 | 0.02 |   | 1 |   |
| ;     |                  |      |   |   |   |
| 20183 | 205.619873046875 | 0.01 |   | 1 |   |
| ;     |                  |      |   |   |   |



|       |                      |      |   |   |
|-------|----------------------|------|---|---|
| 20184 | 205.631637573242     | 0.00 | 1 |   |
| ;     |                      |      |   |   |
| 20185 | 205.33088684082 0.03 |      | 1 | ; |
| 20186 | 205.072784423828     | 0.02 | 1 |   |
| ;     |                      |      |   |   |
| 20187 | 208.476745605469     | 0.02 | 1 |   |
| ;     |                      |      |   |   |
| 20188 | 208.538619995117     | 0.10 | 1 |   |
| ;     |                      |      |   |   |
| 20189 | 219.973083496094     | 0.01 | 1 |   |
| ;     |                      |      |   |   |
| 20190 | 200.314300537109     | 0.02 | 1 |   |
| ;     |                      |      |   |   |
| 20191 | 199.863540649414     | 0.01 | 1 |   |
| ;     |                      |      |   |   |
| 20192 | 200.460098266602     | 0.01 | 1 |   |
| ;     |                      |      |   |   |
| 20193 | 200.801284790039     | 0.03 | 1 |   |
| ;     |                      |      |   |   |
| 20194 | 200.660827636719     | 0.02 | 1 |   |
| ;     |                      |      |   |   |
| 20195 | 201.031478881836     | 0.00 | 1 |   |
| ;     |                      |      |   |   |
| 20196 | 200.985702514648     | 0.05 | 1 |   |
| ;     |                      |      |   |   |
| 20197 | 201.063323974609     | 0.00 | 1 |   |
| ;     |                      |      |   |   |
| 20198 | 227.694107055664     | 0.02 | 1 |   |
| ;     |                      |      |   |   |
| 20199 | 227.718505859375     | 0.00 | 1 |   |
| ;     |                      |      |   |   |
| 20200 | 228.284561157227     | 0.02 | 1 |   |
| ;     |                      |      |   |   |
| 20201 | 223.473739624023     | 0.01 | 1 |   |
| ;     |                      |      |   |   |
| 20202 | 223.501815795898     | 0.01 | 1 |   |
| ;     |                      |      |   |   |
| 20203 | 223.119888305664     | 0.01 | 1 |   |
| ;     |                      |      |   |   |
| 20204 | 223.138717651367     | 0.01 | 1 |   |
| ;     |                      |      |   |   |
| 20205 | 223.36848449707 0.01 |      | 1 | ; |
| 20206 | 223.028579711914     | 0.00 | 1 |   |
| ;     |                      |      |   |   |
| 20207 | 219.52311706543 0.01 |      | 1 | ; |
| 20208 | 219.769012451172     | 0.01 | 1 |   |
| ;     |                      |      |   |   |
| 20209 | 203.37126159668 0.01 |      | 1 | ; |
| 20210 | 203.713012695313     | 0.02 | 1 |   |
| ;     |                      |      |   |   |

|       |                  |      |   |   |
|-------|------------------|------|---|---|
| 20211 | 203.332000732422 | 0.01 | 1 |   |
| ;     |                  |      |   |   |
| 20212 | 203.630966186523 | 0.02 | 1 |   |
| ;     |                  |      |   |   |
| 20213 | 202.489883422852 | 0.01 | 1 |   |
| ;     |                  |      |   |   |
| 20214 | 203.067825317383 | 0.01 | 1 |   |
| ;     |                  |      |   |   |
| 20215 | 220.554412841797 | 0.01 | 1 |   |
| ;     |                  |      |   |   |
| 20216 | 220.563522338867 | 0.04 | 1 |   |
| ;     |                  |      |   |   |
| 20217 | 221.097030639648 | 0.02 | 1 |   |
| ;     |                  |      |   |   |
| 20218 | 220.820465087891 | 0.02 | 1 |   |
| ;     |                  |      |   |   |
| 20219 | 200              | 0.01 | 1 | ; |
| 20220 | 200              | 0.01 | 1 | ; |
| 20221 | 200              | 0.02 | 1 | ; |
| 20222 | 200              | 0.01 | 1 | ; |
| 20223 | 200              | 0.00 | 1 | ; |
| 20224 | 200              | 0.00 | 1 | ; |
| 20225 | 205.809799194336 | 0.02 | 1 |   |
| ;     |                  |      |   |   |
| 20226 | 206.904067993164 | 0.03 | 1 |   |
| ;     |                  |      |   |   |
| 20227 | 202.130599975586 | 0.02 | 1 |   |
| ;     |                  |      |   |   |
| 20228 | 228.295318603516 | 0.05 | 1 |   |
| ;     |                  |      |   |   |
| 20229 | 227.574981689453 | 0.03 | 1 |   |
| ;     |                  |      |   |   |
| 20230 | 227.986404418945 | 0.02 | 1 |   |
| ;     |                  |      |   |   |
| 20231 | 202.692047119141 | 0.03 | 1 |   |
| ;     |                  |      |   |   |
| 20232 | 202.658477783203 | 0.04 | 1 |   |
| ;     |                  |      |   |   |
| 20233 | 200.54736328125  | 0.01 | 1 | ; |
| 20234 | 200.206680297852 | 0.01 | 1 |   |
| ;     |                  |      |   |   |
| 20235 | 208.125411987305 | 0.03 | 1 |   |
| ;     |                  |      |   |   |
| 20236 | 208.945327758789 | 0.03 | 1 |   |
| ;     |                  |      |   |   |
| 20237 | 208.928176879883 | 0.03 | 1 |   |
| ;     |                  |      |   |   |
| 20238 | 202.499816894531 | 0.00 | 1 |   |
| ;     |                  |      |   |   |
| 20239 | 216.253570556641 | 0.01 | 1 |   |

|       |                  |      |   |  |   |
|-------|------------------|------|---|--|---|
| ;     |                  |      |   |  |   |
| 20240 | 217.905609130859 | 0.01 | 1 |  |   |
| ;     |                  |      |   |  |   |
| 20241 | 217.916213989258 | 0.02 | 1 |  |   |
| ;     |                  |      |   |  |   |
| 20242 | 220.662445068359 | 0.01 | 1 |  |   |
| ;     |                  |      |   |  |   |
| 20243 | 220.687194824219 | 0.00 | 1 |  |   |
| ;     |                  |      |   |  |   |
| 20244 | 220.674301147461 | 0.03 | 1 |  |   |
| ;     |                  |      |   |  |   |
| 20245 | 222.911972045898 | 0.00 | 1 |  |   |
| ;     |                  |      |   |  |   |
| 20246 | 222.939331054687 | 0.06 | 1 |  |   |
| ;     |                  |      |   |  |   |
| 20247 | 234.44987487793  | 0.02 | 1 |  | ; |
| 20248 | 234.459915161133 | 0.03 | 1 |  |   |
| ;     |                  |      |   |  |   |
| 20249 | 209.812927246094 | 0.01 | 1 |  |   |
| ;     |                  |      |   |  |   |
| 20250 | 209.804748535156 | 0.01 | 1 |  |   |
| ;     |                  |      |   |  |   |
| 20251 | 209.829330444336 | 0.04 | 1 |  |   |
| ;     |                  |      |   |  |   |
| 20252 | 200.509429931641 | 0.00 | 1 |  |   |
| ;     |                  |      |   |  |   |
| 20253 | 200.500900268555 | 0.03 | 1 |  |   |
| ;     |                  |      |   |  |   |
| 20254 | 209.538619995117 | 0.00 | 1 |  |   |
| ;     |                  |      |   |  |   |
| 20255 | 208.149169921875 | 1.25 | 1 |  |   |
| ;     |                  |      |   |  |   |
| 20256 | 208.128021240234 | 0.00 | 1 |  |   |
| ;     |                  |      |   |  |   |
| 20257 | 210.70475769043  | 0.00 | 1 |  | ; |
| 20258 | 211.23762512207  | 0.02 | 1 |  | ; |
| 20259 | 211.252014160156 | 0.00 | 1 |  |   |
| ;     |                  |      |   |  |   |
| 20260 | 211.384536743164 | 0.00 | 1 |  |   |
| ;     |                  |      |   |  |   |
| 20261 | 210.9404296875   | 0.03 | 1 |  | ; |
| 20262 | 210.912048339844 | 0.00 | 1 |  |   |
| ;     |                  |      |   |  |   |
| 20263 | 213.112319946289 | 0.09 | 1 |  |   |
| ;     |                  |      |   |  |   |
| 20264 | 206.511352539063 | 0.04 | 1 |  |   |
| ;     |                  |      |   |  |   |
| 20265 | 206.499252319336 | 0.00 | 1 |  |   |
| ;     |                  |      |   |  |   |
| 20266 | 203.349273681641 | 0.01 | 1 |  |   |

|       |                  |      |   |   |  |   |
|-------|------------------|------|---|---|--|---|
| ;     |                  |      |   |   |  |   |
| 20267 | 203.330642700195 | 0.04 |   | 1 |  |   |
| ;     |                  |      |   |   |  |   |
| 20268 | 209.710510253906 | 0.00 |   | 1 |  |   |
| ;     |                  |      |   |   |  |   |
| 20269 | 209.735229492188 | 0.07 |   | 1 |  |   |
| ;     |                  |      |   |   |  |   |
| 20270 | 209.570449829102 | 0.00 |   | 1 |  |   |
| ;     |                  |      |   |   |  |   |
| 20271 | 209.579635620117 | 0.00 |   | 1 |  |   |
| ;     |                  |      |   |   |  |   |
| 20272 | 209.986434936523 | 0.03 |   | 1 |  |   |
| ;     |                  |      |   |   |  |   |
| 20273 | 205.912384033203 | 0.03 |   | 1 |  |   |
| ;     |                  |      |   |   |  |   |
| 20274 | 205.901947021484 | 0.12 |   | 1 |  |   |
| ;     |                  |      |   |   |  |   |
| 20275 | 206.522567749023 | 0.02 |   | 1 |  |   |
| ;     |                  |      |   |   |  |   |
| 20276 | 207.425628662109 | 0.00 |   | 1 |  |   |
| ;     |                  |      |   |   |  |   |
| 20277 | 208.384765625    | 0.02 | 1 |   |  | ; |
| 20278 | 208.307830810547 | 0.00 |   | 1 |  |   |
| ;     |                  |      |   |   |  |   |
| 20279 | 217.23486328125  | 0.05 | 1 |   |  | ; |
| 20280 | 217.234085083008 | 0.01 |   | 1 |  |   |
| ;     |                  |      |   |   |  |   |
| 20281 | 216.84130859375  | 0.02 | 1 |   |  | ; |
| 20282 | 216.838333129883 | 0.01 |   | 1 |  |   |
| ;     |                  |      |   |   |  |   |
| 20283 | 237.197631835937 | 0.03 |   | 1 |  |   |
| ;     |                  |      |   |   |  |   |
| 20284 | 220.846176147461 | 0.02 |   | 1 |  |   |
| ;     |                  |      |   |   |  |   |
| 20285 | 220.75456237793  | 0.01 | 1 |   |  | ; |
| 20286 | 221.144714355469 | 0.01 |   | 1 |  |   |
| ;     |                  |      |   |   |  |   |
| 20287 | 221.61589050293  | 0.03 | 1 |   |  | ; |
| 20288 | 221.133911132813 | 0.05 |   | 1 |  |   |
| ;     |                  |      |   |   |  |   |
| 20289 | 228.110260009766 | 0.01 |   | 1 |  |   |
| ;     |                  |      |   |   |  |   |
| 20290 | 228.121490478516 | 0.03 |   | 1 |  |   |
| ;     |                  |      |   |   |  |   |
| 20291 | 228.628189086914 | 0.04 |   | 1 |  |   |
| ;     |                  |      |   |   |  |   |
| 20292 | 200              | 0.03 | 1 |   |  | ; |
| 20293 | 200              | 0.00 | 1 |   |  | ; |
| 20294 | 190.967071533203 | 0.08 |   | 1 |  |   |
| ;     |                  |      |   |   |  |   |

|       |                  |      |   |   |
|-------|------------------|------|---|---|
| 20295 | 190.877243041992 | 0.01 | 1 |   |
| ;     |                  |      |   |   |
| 20296 | 203.728668212891 | 0.06 | 1 |   |
| ;     |                  |      |   |   |
| 20297 | 203.622039794922 | 0.01 | 1 |   |
| ;     |                  |      |   |   |
| 20298 | 230.297500610352 | 0.02 | 1 |   |
| ;     |                  |      |   |   |
| 20299 | 230.606323242188 | 0.02 | 1 |   |
| ;     |                  |      |   |   |
| 20300 | 218.052276611328 | 0.01 | 1 |   |
| ;     |                  |      |   |   |
| 20301 | 231.021438598633 | 0.04 | 1 |   |
| ;     |                  |      |   |   |
| 20302 | 231.88232421875  | 0.04 | 1 |   |
| 20303 | 216.993591308594 | 0.02 | 1 | ; |
| ;     |                  |      |   |   |
| 20304 | 217.3740234375   | 0.01 | 1 |   |
| 20305 | 217.150573730469 | 0.02 | 1 | ; |
| ;     |                  |      |   |   |
| 20306 | 217.445571899414 | 0.03 | 1 |   |
| ;     |                  |      |   |   |
| 20307 | 235.519622802734 | 0.05 | 1 |   |
| ;     |                  |      |   |   |
| 20308 | 236.718658447266 | 0.00 | 1 |   |
| ;     |                  |      |   |   |
| 20309 | 217.661010742188 | 0.01 | 1 |   |
| ;     |                  |      |   |   |
| 20310 | 217.156448364258 | 0.01 | 1 |   |
| ;     |                  |      |   |   |
| 20311 | 192.844055175781 | 0.03 | 1 |   |
| ;     |                  |      |   |   |
| 20312 | 193.042495727539 | 0.04 | 1 |   |
| ;     |                  |      |   |   |
| 20313 | 192.710845947266 | 0.01 | 1 |   |
| ;     |                  |      |   |   |
| 20314 | 234.191909790039 | 0.02 | 1 |   |
| ;     |                  |      |   |   |
| 20315 | 234.600845336914 | 0.01 | 1 |   |
| ;     |                  |      |   |   |
| 20316 | 233.338195800781 | 0.03 | 1 |   |
| ;     |                  |      |   |   |
| 20317 | 231.085479736328 | 0.00 | 1 |   |
| ;     |                  |      |   |   |
| 20318 | 231.010711669922 | 0.03 | 1 |   |
| ;     |                  |      |   |   |
| 20319 | 230.581695556641 | 0.00 | 1 |   |
| ;     |                  |      |   |   |
| 20320 | 230.9111328125   | 0.01 | 1 |   |
| 20321 | 218.452102661133 | 0.00 | 1 | ; |

|       |                  |      |  |   |   |   |
|-------|------------------|------|--|---|---|---|
| ;     |                  |      |  |   |   |   |
| 20322 | 218.914733886719 | 0.00 |  | 1 |   |   |
| ;     |                  |      |  |   |   |   |
| 20323 | 218.838180541992 | 0.02 |  | 1 |   |   |
| ;     |                  |      |  |   |   |   |
| 20324 | 224.343017578125 | 0.00 |  | 1 |   |   |
| ;     |                  |      |  |   |   |   |
| 20325 | 225              | 0.00 |  | 1 |   | ; |
| 20326 | 225              | 0.00 |  | 1 |   | ; |
| 20327 | 228.061004638672 | 0.02 |  |   | 1 |   |
| ;     |                  |      |  |   |   |   |
| 20328 | 225              | 0.00 |  | 1 |   | ; |
| 20329 | 225              | 0.00 |  | 1 |   | ; |
| 20330 | 200.97981262207  | 0.01 |  | 1 |   | ; |
| 20331 | 196.286972045898 | 0.00 |  |   | 1 |   |
| ;     |                  |      |  |   |   |   |
| 20332 | 196.285537719727 | 0.01 |  |   | 1 |   |
| ;     |                  |      |  |   |   |   |
| 20333 | 230.923690795898 | 0.01 |  |   | 1 |   |
| ;     |                  |      |  |   |   |   |
| 20334 | 234.982498168945 | 0.08 |  |   | 1 |   |
| ;     |                  |      |  |   |   |   |
| 20335 | 195.842956542969 | 0.00 |  |   | 1 |   |
| ;     |                  |      |  |   |   |   |
| 20336 | 195.796997070313 | 0.03 |  |   | 1 |   |
| ;     |                  |      |  |   |   |   |
| 20337 | 195.825271606445 | 0.02 |  |   | 1 |   |
| ;     |                  |      |  |   |   |   |
| 20338 | 195.953811645508 | 0.00 |  |   | 1 |   |
| ;     |                  |      |  |   |   |   |
| 20339 | 208.514602661133 | 0.07 |  |   | 1 |   |
| ;     |                  |      |  |   |   |   |
| 20340 | 201.919006347656 | 0.00 |  |   | 1 |   |
| ;     |                  |      |  |   |   |   |
| 20341 | 214.100738525391 | 0.00 |  |   | 1 |   |
| ;     |                  |      |  |   |   |   |
| 20342 | 214.078598022461 | 0.00 |  |   | 1 |   |
| ;     |                  |      |  |   |   |   |
| 20343 | 219.564849853516 | 0.05 |  |   | 1 |   |
| ;     |                  |      |  |   |   |   |
| 20344 | 218.771911621094 | 0.04 |  |   | 1 |   |
| ;     |                  |      |  |   |   |   |
| 20345 | 219.538238525391 | 0.06 |  |   | 1 |   |
| ;     |                  |      |  |   |   |   |
| 20346 | 219.552337646484 | 0.00 |  |   | 1 |   |
| ;     |                  |      |  |   |   |   |
| 20347 | 208.646148681641 | 0.00 |  |   | 1 |   |
| ;     |                  |      |  |   |   |   |
| 20348 | 208.657379150391 | 0.00 |  |   | 1 |   |
| ;     |                  |      |  |   |   |   |

|       |                  |      |   |
|-------|------------------|------|---|
| 20349 | 226.827774047852 | 0.05 | 1 |
| ;     |                  |      |   |
| 20350 | 194.662902832031 | 0.01 | 1 |
| ;     |                  |      |   |
| 20351 | 194.666778564453 | 0.05 | 1 |
| ;     |                  |      |   |
| 20352 | 195.668045043945 | 0.01 | 1 |
| ;     |                  |      |   |
| 20353 | 195.680282592773 | 0.04 | 1 |
| ;     |                  |      |   |
| 20354 | 205.313690185547 | 0.07 | 1 |
| ;     |                  |      |   |
| 20355 | 202.931167602539 | 0.01 | 1 |
| ;     |                  |      |   |
| 20356 | 203.544387817383 | 0.01 | 1 |
| ;     |                  |      |   |
| 20357 | 204.398483276367 | 0.01 | 1 |
| ;     |                  |      |   |
| 20358 | 191.354949951172 | 0.01 | 1 |
| ;     |                  |      |   |
| 20359 | 191.381530761719 | 0.04 | 1 |
| ;     |                  |      |   |
| 20360 | 203.860214233398 | 0.01 | 1 |
| ;     |                  |      |   |
| 20361 | 203.893371582031 | 0.02 | 1 |
| ;     |                  |      |   |
| 20362 | 202.496536254883 | 0.01 | 1 |
| ;     |                  |      |   |
| 20363 | 202.801834106445 | 0.01 | 1 |
| ;     |                  |      |   |
| 20364 | 204.246337890625 | 0.01 | 1 |
| ;     |                  |      |   |
| 20365 | 204.141571044922 | 0.03 | 1 |
| ;     |                  |      |   |
| 20366 | 204.122024536133 | 0.02 | 1 |
| ;     |                  |      |   |
| 20367 | 202.840972900391 | 0.00 | 1 |
| ;     |                  |      |   |
| 20368 | 202.831924438477 | 0.00 | 1 |
| ;     |                  |      |   |
| 20369 | 202.850448608398 | 0.00 | 1 |
| ;     |                  |      |   |
| 20370 | 216.56884765625  | 0.00 | 1 |
| 20371 | 216.551727294922 | 0.04 | 1 |
| ;     |                  |      |   |
| 20372 | 215.050476074219 | 0.03 | 1 |
| ;     |                  |      |   |
| 20373 | 215.070541381836 | 0.05 | 1 |
| ;     |                  |      |   |
| 20374 | 216.530395507813 | 0.01 | 1 |

|       |                      |      |   |   |   |
|-------|----------------------|------|---|---|---|
| ;     |                      |      |   |   |   |
| 20375 | 216.509811401367     | 0.05 |   | 1 |   |
| ;     |                      |      |   |   |   |
| 20376 | 214.94905090332 0.04 |      | 1 |   | ; |
| 20377 | 214.961547851563     | 0.04 |   | 1 |   |
| ;     |                      |      |   |   |   |
| 20378 | 215.26008605957 0.02 |      | 1 |   | ; |
| 20379 | 215.268630981445     | 0.05 |   | 1 |   |
| ;     |                      |      |   |   |   |
| 20380 | 204.623733520508     | 0.02 |   | 1 |   |
| ;     |                      |      |   |   |   |
| 20381 | 204.626708984375     | 0.00 |   | 1 |   |
| ;     |                      |      |   |   |   |
| 20382 | 204.620315551758     | 0.07 |   | 1 |   |
| ;     |                      |      |   |   |   |
| 20383 | 205.573150634766     | 0.00 |   | 1 |   |
| ;     |                      |      |   |   |   |
| 20384 | 205.557434082031     | 0.01 |   | 1 |   |
| ;     |                      |      |   |   |   |
| 20385 | 207.92414855957 0.01 |      | 1 |   | ; |
| 20386 | 220.829559326172     | 0.02 |   | 1 |   |
| ;     |                      |      |   |   |   |
| 20387 | 220.85107421875 0.04 |      | 1 |   | ; |
| 20388 | 220.085540771484     | 0.01 |   | 1 |   |
| ;     |                      |      |   |   |   |
| 20389 | 220.103805541992     | 0.06 |   | 1 |   |
| ;     |                      |      |   |   |   |
| 20390 | 219.789306640625     | 0.02 |   | 1 |   |
| ;     |                      |      |   |   |   |
| 20391 | 219.8134765625 0.01  |      | 1 |   | ; |
| 20392 | 220.19645690918 0.02 |      | 1 |   | ; |
| 20393 | 220.175415039063     | 0.04 |   | 1 |   |
| ;     |                      |      |   |   |   |
| 20394 | 234.402893066406     | 0.00 |   | 1 |   |
| ;     |                      |      |   |   |   |
| 20395 | 234.422027587891     | 0.04 |   | 1 |   |
| ;     |                      |      |   |   |   |
| 20396 | 229.202774047852     | 0.01 |   | 1 |   |
| ;     |                      |      |   |   |   |
| 20397 | 229.187805175781     | 0.01 |   | 1 |   |
| ;     |                      |      |   |   |   |
| 20398 | 227.837829589844     | 0.04 |   | 1 |   |
| ;     |                      |      |   |   |   |
| 20399 | 220.66520690918 0.00 |      | 1 |   | ; |
| 20400 | 230.434814453125     | 0.00 |   | 1 |   |
| ;     |                      |      |   |   |   |
| 20401 | 230.444976806641     | 0.05 |   | 1 |   |
| ;     |                      |      |   |   |   |
| 20402 | 197.252487182617     | 0.03 |   | 1 |   |
| ;     |                      |      |   |   |   |



|       |                      |      |   |
|-------|----------------------|------|---|
| 20403 | 197.235626220703     | 0.00 | 1 |
| ;     |                      |      |   |
| 20404 | 209.908218383789     | 0.05 | 1 |
| ;     |                      |      |   |
| 20405 | 206.485610961914     | 0.01 | 1 |
| ;     |                      |      |   |
| 20406 | 206.571319580078     | 0.04 | 1 |
| ;     |                      |      |   |
| 20407 | 206.557662963867     | 0.01 | 1 |
| ;     |                      |      |   |
| 20408 | 205.637496948242     | 0.00 | 1 |
| ;     |                      |      |   |
| 20409 | 205.708389282227     | 0.00 | 1 |
| ;     |                      |      |   |
| 20410 | 205.980392456055     | 0.02 | 1 |
| ;     |                      |      |   |
| 20411 | 205.651260375977     | 0.01 | 1 |
| ;     |                      |      |   |
| 20412 | 206.044891357422     | 0.03 | 1 |
| ;     |                      |      |   |
| 20413 | 216.782852172852     | 0.01 | 1 |
| ;     |                      |      |   |
| 20414 | 217.856170654297     | 0.03 | 1 |
| ;     |                      |      |   |
| 20415 | 217.606781005859     | 0.01 | 1 |
| ;     |                      |      |   |
| 20416 | 225.496658325195     | 0.05 | 1 |
| ;     |                      |      |   |
| 20417 | 225.691879272461     | 0.01 | 1 |
| ;     |                      |      |   |
| 20418 | 225.690185546875     | 0.02 | 1 |
| ;     |                      |      |   |
| 20419 | 226.620193481445     | 0.00 | 1 |
| ;     |                      |      |   |
| 20420 | 226.629623413086     | 0.00 | 1 |
| ;     |                      |      |   |
| 20421 | 210.106735229492     | 0.00 | 1 |
| ;     |                      |      |   |
| 20422 | 210.09992980957 0.00 | 1    | ; |
| 20423 | 195.686141967773     | 0.06 | 1 |
| ;     |                      |      |   |
| 20424 | 195.770462036133     | 0.03 | 1 |
| ;     |                      |      |   |
| 20425 | 195.959259033203     | 0.03 | 1 |
| ;     |                      |      |   |
| 20426 | 195.471405029297     | 0.04 | 1 |
| ;     |                      |      |   |
| 20427 | 193.843460083008     | 0.00 | 1 |
| ;     |                      |      |   |
| 20428 | 195.647796630859     | 0.00 | 1 |

|       |                      |      |   |   |
|-------|----------------------|------|---|---|
| ;     |                      |      |   |   |
| 20429 | 208.963882446289     | 0.00 | 1 |   |
| ;     |                      |      |   |   |
| 20430 | 206.195526123047     | 0.00 | 1 |   |
| ;     |                      |      |   |   |
| 20431 | 205.70881652832 0.01 |      | 1 | ; |
| 20432 | 206.281433105469     | 0.01 | 1 |   |
| ;     |                      |      |   |   |
| 20433 | 205.368591308594     | 0.06 | 1 |   |
| ;     |                      |      |   |   |
| 20434 | 205.362182617188     | 0.18 | 1 |   |
| ;     |                      |      |   |   |
| 20435 | 219.943099975586     | 0.00 | 1 |   |
| ;     |                      |      |   |   |
| 20436 | 204.391250610352     | 0.01 | 1 |   |
| ;     |                      |      |   |   |
| 20437 | 204.397048950195     | 0.00 | 1 |   |
| ;     |                      |      |   |   |
| 20438 | 200.702774047852     | 0.03 | 1 |   |
| ;     |                      |      |   |   |
| 20439 | 206.408233642578     | 0.00 | 1 |   |
| ;     |                      |      |   |   |
| 20440 | 230.568695068359     | 0.01 | 1 |   |
| ;     |                      |      |   |   |
| 20441 | 195.296585083008     | 0.01 | 1 |   |
| ;     |                      |      |   |   |
| 20442 | 195.307189941406     | 0.04 | 1 |   |
| ;     |                      |      |   |   |
| 20443 | 203.882537841797     | 0.01 | 1 |   |
| ;     |                      |      |   |   |
| 20444 | 207.065093994141     | 0.08 | 1 |   |
| ;     |                      |      |   |   |
| 20445 | 224.728118896484     | 0.01 | 1 |   |
| ;     |                      |      |   |   |
| 20446 | 219.577590942383     | 0.03 | 1 |   |
| ;     |                      |      |   |   |
| 20447 | 210.113220214844     | 0.00 | 1 |   |
| ;     |                      |      |   |   |
| 20448 | 210.176559448242     | 0.02 | 1 |   |
| ;     |                      |      |   |   |
| 20449 | 210.163558959961     | 0.02 | 1 |   |
| ;     |                      |      |   |   |
| 20450 | 210.493377685547     | 0.01 | 1 |   |
| ;     |                      |      |   |   |
| 20451 | 210.823120117188     | 0.02 | 1 |   |
| ;     |                      |      |   |   |
| 20452 | 211.17512512207 0.01 |      | 1 | ; |
| 20453 | 211.184783935547     | 0.01 | 1 |   |
| ;     |                      |      |   |   |
| 20454 | 209.918701171875     | 0.04 | 1 |   |

|       |                      |      |   |   |   |
|-------|----------------------|------|---|---|---|
| ;     |                      |      |   |   |   |
| 20455 | 209.912933349609     | 0.00 |   | 1 |   |
| ;     |                      |      |   |   |   |
| 20456 | 209.920043945312     | 0.00 |   | 1 |   |
| ;     |                      |      |   |   |   |
| 20457 | 209.893020629883     | 0.00 |   | 1 |   |
| ;     |                      |      |   |   |   |
| 20458 | 209.903579711914     | 0.00 |   | 1 |   |
| ;     |                      |      |   |   |   |
| 20459 | 206.564163208008     | 0.00 |   | 1 |   |
| ;     |                      |      |   |   |   |
| 20460 | 206.556762695313     | 0.02 |   | 1 |   |
| ;     |                      |      |   |   |   |
| 20461 | 207.19416809082 0.00 |      | 1 |   | ; |
| 20462 | 222.95979309082 0.04 |      | 1 |   | ; |
| 20463 | 222.934875488281     | 0.01 |   | 1 |   |
| ;     |                      |      |   |   |   |
| 20464 | 231.18684387207 0.00 |      | 1 |   | ; |
| 20465 | 205.98698425293 0.01 |      | 1 |   | ; |
| 20466 | 194.94694519043 0.01 |      | 1 |   | ; |
| 20467 | 194.953399658203     | 0.05 |   | 1 |   |
| ;     |                      |      |   |   |   |
| 20468 | 191.229232788086     | 0.00 |   | 1 |   |
| ;     |                      |      |   |   |   |
| 20469 | 191.202453613281     | 0.01 |   | 1 |   |
| ;     |                      |      |   |   |   |
| 20470 | 219.113906860352     | 0.01 |   | 1 |   |
| ;     |                      |      |   |   |   |
| 20471 | 219.1103515625 0.01  |      | 1 |   | ; |
| 20472 | 219.8310546875 0.02  |      | 1 |   | ; |
| 20473 | 219.838485717773     | 0.01 |   | 1 |   |
| ;     |                      |      |   |   |   |
| 20474 | 220.266708374023     | 0.01 |   | 1 |   |
| ;     |                      |      |   |   |   |
| 20475 | 220.278533935547     | 0.00 |   | 1 |   |
| ;     |                      |      |   |   |   |
| 20476 | 219.487747192383     | 0.01 |   | 1 |   |
| ;     |                      |      |   |   |   |
| 20477 | 219.485702514648     | 0.01 |   | 1 |   |
| ;     |                      |      |   |   |   |
| 20478 | 216.343002319336     | 0.11 |   | 1 |   |
| ;     |                      |      |   |   |   |
| 20479 | 216.357528686523     | 0.09 |   | 1 |   |
| ;     |                      |      |   |   |   |
| 20480 | 221.225891113281     | 0.01 |   | 1 |   |
| ;     |                      |      |   |   |   |
| 20481 | 221.247680664063     | 0.01 |   | 1 |   |
| ;     |                      |      |   |   |   |
| 20482 | 231.639953613281     | 0.05 |   | 1 |   |
| ;     |                      |      |   |   |   |

|       |                  |      |   |   |
|-------|------------------|------|---|---|
| 20483 | 231.020553588867 | 0.02 | 1 |   |
| ;     |                  |      |   |   |
| 20484 | 228.478607177734 | 0.00 | 1 |   |
| ;     |                  |      |   |   |
| 20485 | 228.49201965332  | 0.06 | 1 | ; |
| 20486 | 229.091354370117 | 0.02 | 1 |   |
| ;     |                  |      |   |   |
| 20487 | 229.078796386719 | 0.00 | 1 |   |
| ;     |                  |      |   |   |
| 20488 | 228.994003295898 | 0.00 | 1 |   |
| ;     |                  |      |   |   |
| 20489 | 229.007080078125 | 0.00 | 1 |   |
| ;     |                  |      |   |   |
| 20490 | 233.971450805664 | 0.02 | 1 |   |
| ;     |                  |      |   |   |
| 20491 | 233.988220214844 | 0.03 | 1 |   |
| ;     |                  |      |   |   |
| 20492 | 234.432189941406 | 0.02 | 1 |   |
| ;     |                  |      |   |   |
| 20493 | 234.427490234375 | 0.02 | 1 |   |
| ;     |                  |      |   |   |
| 20494 | 232.283660888672 | 0.02 | 1 |   |
| ;     |                  |      |   |   |
| 20495 | 232.288391113281 | 0.01 | 1 |   |
| ;     |                  |      |   |   |
| 20496 | 200              | 0.03 | 1 | ; |
| 20497 | 200              | 0.00 | 1 | ; |
| 20498 | 200              | 0.05 | 1 | ; |
| 20499 | 200              | 0.00 | 1 | ; |
| 20500 | 200              | 0.00 | 1 | ; |
| 20501 | 200              | 0.02 | 1 | ; |
| 20502 | 200              | 0.01 | 1 | ; |
| 20503 | 203.611053466797 | 0.01 | 1 |   |
| ;     |                  |      |   |   |
| 20504 | 205.066268920898 | 0.01 | 1 |   |
| ;     |                  |      |   |   |
| 20505 | 195.816116333008 | 0.00 | 1 |   |
| ;     |                  |      |   |   |
| 20506 | 200              | 0.05 | 1 | ; |
| 20507 | 200              | 0.02 | 1 | ; |
| 20508 | 200              | 0.00 | 1 | ; |
| 20509 | 200              | 0.01 | 1 | ; |
| 20510 | 202.660919189453 | 0.02 | 1 |   |
| ;     |                  |      |   |   |
| 20511 | 200.629592895508 | 0.10 | 1 |   |
| ;     |                  |      |   |   |
| 20512 | 200.616241455078 | 0.00 | 1 |   |
| ;     |                  |      |   |   |
| 20513 | 208.053421020508 | 0.04 | 1 |   |
| ;     |                  |      |   |   |

|       |                  |      |   |   |
|-------|------------------|------|---|---|
| 20514 | 207.057205200195 | 0.04 | 1 |   |
| ;     |                  |      |   |   |
| 20515 | 207.254180908203 | 0.00 | 1 |   |
| ;     |                  |      |   |   |
| 20516 | 211.989456176758 | 0.00 | 1 |   |
| ;     |                  |      |   |   |
| 20517 | 212.032272338867 | 0.00 | 1 |   |
| ;     |                  |      |   |   |
| 20518 | 205.066482543945 | 0.00 | 1 |   |
| ;     |                  |      |   |   |
| 20519 | 205.058959960938 | 0.02 | 1 |   |
| ;     |                  |      |   |   |
| 20520 | 204.388305664063 | 0.03 | 1 |   |
| ;     |                  |      |   |   |
| 20521 | 204.373901367188 | 0.03 | 1 |   |
| ;     |                  |      |   |   |
| 20522 | 204.552017211914 | 0.07 | 1 |   |
| ;     |                  |      |   |   |
| 20523 | 204.537292480469 | 0.04 | 1 |   |
| ;     |                  |      |   |   |
| 20524 | 204.706771850586 | 0.13 | 1 |   |
| ;     |                  |      |   |   |
| 20525 | 204.566543579102 | 0.11 | 1 |   |
| ;     |                  |      |   |   |
| 20526 | 204.543701171875 | 0.05 | 1 |   |
| ;     |                  |      |   |   |
| 20527 | 202.533187866211 | 0.03 | 1 |   |
| ;     |                  |      |   |   |
| 20528 | 203.823974609375 | 0.01 | 1 |   |
| ;     |                  |      |   |   |
| 20529 | 190.160110473633 | 0.01 | 1 |   |
| ;     |                  |      |   |   |
| 20530 | 190.312255859375 | 0.00 | 1 |   |
| ;     |                  |      |   |   |
| 20531 | 206.51042175293  | 0.01 | 1 |   |
| 20532 | 206.454467773438 | 0.01 | 1 | ; |
| ;     |                  |      |   |   |
| 20533 | 206.372421264648 | 0.02 | 1 |   |
| ;     |                  |      |   |   |
| 20534 | 209.75           | 0.00 | 1 |   |
| 20535 | 221.667892456055 | 0.03 | 1 | ; |
| ;     |                  |      |   |   |
| 20536 | 229.236572265625 | 0.00 | 1 |   |
| ;     |                  |      |   |   |
| 20537 | 228.977691650391 | 0.01 | 1 |   |
| ;     |                  |      |   |   |
| 20538 | 216.634002685547 | 0.01 | 1 |   |
| ;     |                  |      |   |   |
| 20539 | 218.180816650391 | 0.01 | 1 |   |
| ;     |                  |      |   |   |

|       |                  |      |   |   |
|-------|------------------|------|---|---|
| 20540 | 208.390609741211 | 0.03 | 1 |   |
| ;     |                  |      |   |   |
| 20541 | 207.681579589844 | 0.03 | 1 |   |
| ;     |                  |      |   |   |
| 20542 | 219.225280761719 | 0.05 | 1 |   |
| ;     |                  |      |   |   |
| 20543 | 219.259918212891 | 0.05 | 1 |   |
| ;     |                  |      |   |   |
| 20544 | 218.260589599609 | 0.00 | 1 |   |
| ;     |                  |      |   |   |
| 20545 | 217.492370605469 | 0.00 | 1 |   |
| ;     |                  |      |   |   |
| 20546 | 217.512054443359 | 0.01 | 1 |   |
| ;     |                  |      |   |   |
| 20547 | 202.217330932617 | 0.01 | 1 |   |
| ;     |                  |      |   |   |
| 20548 | 202.454254150391 | 0.01 | 1 |   |
| ;     |                  |      |   |   |
| 20549 | 224.864013671875 | 0.09 | 1 |   |
| ;     |                  |      |   |   |
| 20550 | 223.00764465332  | 0.05 | 1 |   |
| 20551 | 236.288162231445 | 0.03 | 1 | ; |
| ;     |                  |      |   |   |
| 20552 | 235.758804321289 | 0.03 | 1 |   |
| ;     |                  |      |   |   |
| 20553 | 202.466491699219 | 0.02 | 1 |   |
| ;     |                  |      |   |   |
| 20554 | 202.610504150391 | 0.02 | 1 |   |
| ;     |                  |      |   |   |
| 20555 | 202.375152587891 | 0.02 | 1 |   |
| ;     |                  |      |   |   |
| 20556 | 217.237747192383 | 0.05 | 1 |   |
| ;     |                  |      |   |   |
| 20557 | 216.917251586914 | 0.03 | 1 |   |
| ;     |                  |      |   |   |
| 20558 | 217.269393920898 | 0.02 | 1 |   |
| ;     |                  |      |   |   |
| 20559 | 214.206008911133 | 0.01 | 1 |   |
| ;     |                  |      |   |   |
| 20560 | 214.404220581055 | 0.00 | 1 |   |
| ;     |                  |      |   |   |
| 20561 | 225.796234130859 | 0.02 | 1 |   |
| ;     |                  |      |   |   |
| 20562 | 225.520797729492 | 0.01 | 1 |   |
| ;     |                  |      |   |   |
| 20563 | 226.604629516602 | 0.01 | 1 |   |
| ;     |                  |      |   |   |
| 20564 | 195.796493530273 | 0.03 | 1 |   |
| ;     |                  |      |   |   |
| 20565 | 205.957595825195 | 0.01 | 1 |   |

|       |                  |      |   |
|-------|------------------|------|---|
| ;     |                  |      |   |
| 20566 | 235.648498535156 | 0.03 | 1 |
| ;     |                  |      |   |
| 20567 | 203.694320678711 | 0.02 | 1 |
| ;     |                  |      |   |
| 20568 | 234.186950683594 | 0.08 | 1 |
| ;     |                  |      |   |
| 20569 | 195.969650268555 | 0.00 | 1 |
| ;     |                  |      |   |
| 20570 | 195.983642578125 | 0.03 | 1 |
| ;     |                  |      |   |
| 20571 | 196.368530273438 | 0.02 | 1 |
| ;     |                  |      |   |
| 20572 | 196.367553710938 | 0.02 | 1 |
| ;     |                  |      |   |
| 20573 | 196.331359863281 | 0.03 | 1 |
| ;     |                  |      |   |
| 20574 | 196.344329833984 | 0.02 | 1 |
| ;     |                  |      |   |
| 20575 | 195.840591430664 | 0.02 | 1 |
| ;     |                  |      |   |
| 20576 | 232.752517700195 | 0.01 | 1 |
| ;     |                  |      |   |
| 20577 | 217.556045532227 | 0.01 | 1 |
| ;     |                  |      |   |
| 20578 | 217.565704345703 | 0.01 | 1 |
| ;     |                  |      |   |
| 20579 | 203.674453735352 | 0.05 | 1 |
| ;     |                  |      |   |
| 20580 | 195.582641601563 | 0.00 | 1 |
| ;     |                  |      |   |
| 20581 | 202.892974853516 | 0.00 | 1 |
| ;     |                  |      |   |
| 20582 | 202.880523681641 | 0.00 | 1 |
| ;     |                  |      |   |
| 20583 | 202.903747558594 | 0.00 | 1 |
| ;     |                  |      |   |
| 20584 | 201.098007202148 | 0.03 | 1 |
| ;     |                  |      |   |
| 20585 | 197.652694702148 | 0.04 | 1 |
| ;     |                  |      |   |
| 20586 | 197.665100097656 | 0.02 | 1 |
| ;     |                  |      |   |
| 20587 | 206.764770507813 | 0.02 | 1 |
| ;     |                  |      |   |
| 20588 | 206.321853637695 | 0.00 | 1 |
| ;     |                  |      |   |
| 20589 | 206.301864624023 | 0.01 | 1 |
| ;     |                  |      |   |
| 20590 | 201.458267211914 | 0.01 | 1 |

|       |                  |      |   |   |   |
|-------|------------------|------|---|---|---|
| ;     |                  |      |   |   |   |
| 20591 | 201.470947265625 | 0.01 |   | 1 |   |
| ;     |                  |      |   |   |   |
| 20592 | 205.871520996094 | 0.00 |   | 1 |   |
| ;     |                  |      |   |   |   |
| 20593 | 205.873443603516 | 0.00 |   | 1 |   |
| ;     |                  |      |   |   |   |
| 20594 | 205.896377563477 | 0.00 |   | 1 |   |
| ;     |                  |      |   |   |   |
| 20595 | 205.04866027832  | 0.08 | 1 |   | ; |
| 20596 | 204.662322998047 | 0.00 |   | 1 |   |
| ;     |                  |      |   |   |   |
| 20597 | 197.366195678711 | 0.00 |   | 1 |   |
| ;     |                  |      |   |   |   |
| 20598 | 197.800476074219 | 0.01 |   | 1 |   |
| ;     |                  |      |   |   |   |
| 20599 | 211.630126953125 | 0.01 |   | 1 |   |
| ;     |                  |      |   |   |   |
| 20600 | 211.644989013672 | 0.00 |   | 1 |   |
| ;     |                  |      |   |   |   |
| 20601 | 218.734802246094 | 0.01 |   | 1 |   |
| ;     |                  |      |   |   |   |
| 20602 | 218.739242553711 | 0.01 |   | 1 |   |
| ;     |                  |      |   |   |   |
| 20603 | 216.556091308594 | 0.01 |   | 1 |   |
| ;     |                  |      |   |   |   |
| 20604 | 216.571853637695 | 0.04 |   | 1 |   |
| ;     |                  |      |   |   |   |
| 20605 | 233.296829223633 | 0.02 |   | 1 |   |
| ;     |                  |      |   |   |   |
| 20606 | 200              | 0.00 | 1 |   | ; |
| 20607 | 202.577972412109 | 0.03 |   | 1 |   |
| ;     |                  |      |   |   |   |
| 20608 | 202.576721191406 | 0.00 |   | 1 |   |
| ;     |                  |      |   |   |   |
| 20609 | 204.98063659668  | 0.00 | 1 |   | ; |
| 20610 | 210.559982299805 | 0.01 |   | 1 |   |
| ;     |                  |      |   |   |   |
| 20611 | 201.970520019531 | 0.01 |   | 1 |   |
| ;     |                  |      |   |   |   |
| 20612 | 201.961151123047 | 0.04 |   | 1 |   |
| ;     |                  |      |   |   |   |
| 20613 | 208.846069335938 | 0.03 |   | 1 |   |
| ;     |                  |      |   |   |   |
| 20614 | 208.831008911133 | 0.02 |   | 1 |   |
| ;     |                  |      |   |   |   |
| 20615 | 229.481948852539 | 0.02 |   | 1 |   |
| ;     |                  |      |   |   |   |
| 20616 | 229.909301757812 | 0.13 |   | 1 |   |
| ;     |                  |      |   |   |   |



|       |                  |      |   |
|-------|------------------|------|---|
| 20617 | 229.508972167969 | 0.00 | 1 |
| ;     |                  |      |   |
| 20618 | 229.621063232422 | 0.06 | 1 |
| ;     |                  |      |   |
| 20619 | 230.393890380859 | 0.05 | 1 |
| ;     |                  |      |   |
| 20620 | 217.680618286133 | 0.01 | 1 |
| ;     |                  |      |   |
| 20621 | 218.335250854492 | 0.01 | 1 |
| ;     |                  |      |   |
| 20622 | 197.617080688477 | 0.01 | 1 |
| ;     |                  |      |   |
| 20623 | 197.906204223633 | 0.01 | 1 |
| ;     |                  |      |   |
| 20624 | 197.612396240234 | 0.01 | 1 |
| ;     |                  |      |   |
| 20625 | 197.605834960938 | 0.01 | 1 |
| ;     |                  |      |   |
| 20626 | 197.259796142578 | 0.01 | 1 |
| ;     |                  |      |   |
| 20627 | 197.180923461914 | 0.01 | 1 |
| ;     |                  |      |   |
| 20628 | 228.779876708984 | 0.00 | 1 |
| ;     |                  |      |   |
| 20629 | 229.020614624023 | 0.02 | 1 |
| ;     |                  |      |   |
| 20630 | 228.488327026367 | 0.01 | 1 |
| ;     |                  |      |   |
| 20631 | 204.780700683594 | 0.02 | 1 |
| ;     |                  |      |   |
| 20632 | 204.812911987305 | 0.00 | 1 |
| ;     |                  |      |   |
| 20633 | 204.919891357422 | 0.02 | 1 |
| ;     |                  |      |   |
| 20634 | 222.275741577148 | 0.03 | 1 |
| ;     |                  |      |   |
| 20635 | 222.792572021484 | 0.03 | 1 |
| ;     |                  |      |   |
| 20636 | 222.154220581055 | 0.17 | 1 |
| ;     |                  |      |   |
| 20637 | 204.257888793945 | 0.02 | 1 |
| ;     |                  |      |   |
| 20638 | 204.609954833984 | 0.01 | 1 |
| ;     |                  |      |   |
| 20639 | 209.966217041016 | 0.00 | 1 |
| ;     |                  |      |   |
| 20640 | 210.746002197266 | 0.01 | 1 |
| ;     |                  |      |   |
| 20641 | 210.777084350586 | 0.02 | 1 |
| ;     |                  |      |   |

|       |                  |      |   |   |
|-------|------------------|------|---|---|
| 20642 | 211.057479858398 | 0.03 | 1 |   |
| ;     |                  |      |   |   |
| 20643 | 216.441055297852 | 0.05 | 1 |   |
| ;     |                  |      |   |   |
| 20644 | 217.435577392578 | 0.04 | 1 |   |
| ;     |                  |      |   |   |
| 20645 | 216.455642700195 | 0.00 | 1 |   |
| ;     |                  |      |   |   |
| 20646 | 216.734436035156 | 0.00 | 1 |   |
| ;     |                  |      |   |   |
| 20647 | 219.031723022461 | 0.02 | 1 |   |
| ;     |                  |      |   |   |
| 20648 | 219.139511108398 | 0.01 | 1 |   |
| ;     |                  |      |   |   |
| 20649 | 205              | 0.00 | 1 | ; |
| 20650 | 204.937774658203 | 0.02 | 1 |   |
| ;     |                  |      |   |   |
| 20651 | 204.360198974609 | 0.02 | 1 |   |
| ;     |                  |      |   |   |
| 20652 | 221.658706665039 | 0.01 | 1 |   |
| ;     |                  |      |   |   |
| 20653 | 221.944076538086 | 0.09 | 1 |   |
| ;     |                  |      |   |   |
| 20654 | 222.490783691406 | 0.06 | 1 |   |
| ;     |                  |      |   |   |
| 20655 | 222.229736328125 | 0.01 | 1 |   |
| ;     |                  |      |   |   |
| 20656 | 222.818588256836 | 0.08 | 1 |   |
| ;     |                  |      |   |   |
| 20657 | 223.197662353516 | 0.06 | 1 |   |
| ;     |                  |      |   |   |
| 20658 | 221.989944458008 | 0.07 | 1 |   |
| ;     |                  |      |   |   |
| 20659 | 219.347564697266 | 0.01 | 1 |   |
| ;     |                  |      |   |   |
| 20660 | 220.43098449707  | 0.01 | 1 | ; |
| 20661 | 202.43635559082  | 0.00 | 1 | ; |
| 20662 | 202.213241577148 | 0.00 | 1 |   |
| ;     |                  |      |   |   |
| 20663 | 202.816802978516 | 0.04 | 1 |   |
| ;     |                  |      |   |   |
| 20664 | 202.124893188477 | 0.07 | 1 |   |
| ;     |                  |      |   |   |
| 20665 | 202.019119262695 | 0.05 | 1 |   |
| ;     |                  |      |   |   |
| 20666 | 201.912673950195 | 0.04 | 1 |   |
| ;     |                  |      |   |   |
| 20667 | 235.329788208008 | 0.02 | 1 |   |
| ;     |                  |      |   |   |
| 20668 | 235.023971557617 | 0.01 | 1 |   |

|       |                  |      |   |   |   |
|-------|------------------|------|---|---|---|
| ;     |                  |      |   |   |   |
| 20669 | 216.154876708984 | 0.02 |   | 1 |   |
| ;     |                  |      |   |   |   |
| 20670 | 219.748046875    | 0.02 | 1 |   | ; |
| 20671 | 218.880447387695 | 0.02 |   | 1 |   |
| ;     |                  |      |   |   |   |
| 20672 | 219.583633422852 | 0.01 |   | 1 |   |
| ;     |                  |      |   |   |   |
| 20673 | 193.121917724609 | 0.01 |   | 1 |   |
| ;     |                  |      |   |   |   |
| 20674 | 192.865951538086 | 0.01 |   | 1 |   |
| ;     |                  |      |   |   |   |
| 20675 | 192.320861816406 | 0.04 |   | 1 |   |
| ;     |                  |      |   |   |   |
| 20676 | 192.638092041016 | 0.03 |   | 1 |   |
| ;     |                  |      |   |   |   |
| 20677 | 192.648986816406 | 0.01 |   | 1 |   |
| ;     |                  |      |   |   |   |
| 20678 | 228.391952514648 | 0.03 |   | 1 |   |
| ;     |                  |      |   |   |   |
| 20679 | 227.861068725586 | 0.00 |   | 1 |   |
| ;     |                  |      |   |   |   |
| 20680 | 227.598541259766 | 0.00 |   | 1 |   |
| ;     |                  |      |   |   |   |
| 20681 | 227.576034545898 | 0.00 |   | 1 |   |
| ;     |                  |      |   |   |   |
| 20682 | 227.230712890625 | 0.00 |   | 1 |   |
| ;     |                  |      |   |   |   |
| 20683 | 227.569519042969 | 0.00 |   | 1 |   |
| ;     |                  |      |   |   |   |
| 20684 | 211.191680908203 | 0.01 |   | 1 |   |
| ;     |                  |      |   |   |   |
| 20685 | 206.570129394531 | 0.01 |   | 1 |   |
| ;     |                  |      |   |   |   |
| 20686 | 226.699340820313 | 0.01 |   | 1 |   |
| ;     |                  |      |   |   |   |
| 20687 | 226.681777954102 | 0.00 |   | 1 |   |
| ;     |                  |      |   |   |   |
| 20688 | 225.242523193359 | 0.02 |   | 1 |   |
| ;     |                  |      |   |   |   |
| 20689 | 226.16716003418  | 0.05 | 1 |   | ; |
| 20690 | 226.062576293945 | 0.01 |   | 1 |   |
| ;     |                  |      |   |   |   |
| 20691 | 226.07145690918  | 0.01 | 1 |   | ; |
| 20692 | 226.672561645508 | 0.01 |   | 1 |   |
| ;     |                  |      |   |   |   |
| 20693 | 226.692352294922 | 0.00 |   | 1 |   |
| ;     |                  |      |   |   |   |
| 20694 | 196.178436279297 | 0.03 |   | 1 |   |
| ;     |                  |      |   |   |   |

|       |                  |      |   |   |
|-------|------------------|------|---|---|
| 20695 | 196.192932128906 | 0.02 | 1 |   |
| ;     |                  |      |   |   |
| 20696 | 197.169677734375 | 0.01 | 1 |   |
| ;     |                  |      |   |   |
| 20697 | 197.213562011719 | 0.00 | 1 |   |
| ;     |                  |      |   |   |
| 20698 | 197.145599365234 | 0.02 | 1 |   |
| ;     |                  |      |   |   |
| 20699 | 196.830581665039 | 0.02 | 1 |   |
| ;     |                  |      |   |   |
| 20700 | 196.835037231445 | 0.02 | 1 |   |
| ;     |                  |      |   |   |
| 20701 | 196.48796081543  | 0.02 | 1 |   |
| 20702 | 196.506393432617 | 0.02 | 1 | ; |
| ;     |                  |      |   |   |
| 20703 | 196.305450439453 | 0.02 | 1 |   |
| ;     |                  |      |   |   |
| 20704 | 195.92121887207  | 0.03 | 1 |   |
| 20705 | 196.215957641602 | 0.02 | 1 | ; |
| ;     |                  |      |   |   |
| 20706 | 195.824722290039 | 0.02 | 1 |   |
| ;     |                  |      |   |   |
| 20707 | 196.269912719727 | 0.02 | 1 |   |
| ;     |                  |      |   |   |
| 20708 | 196.313674926758 | 0.02 | 1 |   |
| ;     |                  |      |   |   |
| 20709 | 196.326431274414 | 0.01 | 1 |   |
| ;     |                  |      |   |   |
| 20710 | 196.343231201172 | 0.02 | 1 |   |
| ;     |                  |      |   |   |
| 20711 | 231.597946166992 | 0.04 | 1 |   |
| ;     |                  |      |   |   |
| 20712 | 231.587158203125 | 0.01 | 1 |   |
| ;     |                  |      |   |   |
| 20713 | 207.895843505859 | 0.00 | 1 |   |
| ;     |                  |      |   |   |
| 20714 | 206.523468017578 | 0.00 | 1 |   |
| ;     |                  |      |   |   |
| 20715 | 207.447036743164 | 0.00 | 1 |   |
| ;     |                  |      |   |   |
| 20716 | 207.422943115234 | 0.00 | 1 |   |
| ;     |                  |      |   |   |
| 20717 | 208.255126953125 | 0.06 | 1 |   |
| ;     |                  |      |   |   |
| 20718 | 208.249801635742 | 0.09 | 1 |   |
| ;     |                  |      |   |   |
| 20719 | 207.44987487793  | 0.07 | 1 |   |
| 20720 | 207.471328735352 | 0.07 | 1 | ; |
| ;     |                  |      |   |   |
| 20721 | 204.649658203125 | 0.04 | 1 |   |

|       |                  |      |   |   |
|-------|------------------|------|---|---|
| ;     |                  |      |   |   |
| 20722 | 204.361785888672 | 0.09 | 1 |   |
| ;     |                  |      |   |   |
| 20723 | 205.843200683594 | 0.01 | 1 |   |
| ;     |                  |      |   |   |
| 20724 | 205.830230712891 | 0.06 | 1 |   |
| ;     |                  |      |   |   |
| 20725 | 209.783554077148 | 0.05 | 1 |   |
| ;     |                  |      |   |   |
| 20726 | 209.762222290039 | 0.02 | 1 |   |
| ;     |                  |      |   |   |
| 20727 | 208.801803588867 | 0.01 | 1 |   |
| ;     |                  |      |   |   |
| 20728 | 208.792861938477 | 0.02 | 1 |   |
| ;     |                  |      |   |   |
| 20729 | 208.481338500977 | 0.04 | 1 |   |
| ;     |                  |      |   |   |
| 20730 | 208.491500854492 | 0.01 | 1 |   |
| ;     |                  |      |   |   |
| 20731 | 200.068420410156 | 0.01 | 1 |   |
| ;     |                  |      |   |   |
| 20732 | 200.105606079102 | 0.01 | 1 |   |
| ;     |                  |      |   |   |
| 20733 | 210.757873535156 | 0.00 | 1 |   |
| ;     |                  |      |   |   |
| 20734 | 210.737319946289 | 0.01 | 1 |   |
| ;     |                  |      |   |   |
| 20735 | 209.093414306641 | 0.00 | 1 |   |
| ;     |                  |      |   |   |
| 20736 | 209.507797241211 | 0.00 | 1 |   |
| ;     |                  |      |   |   |
| 20737 | 209.639801025391 | 0.00 | 1 |   |
| ;     |                  |      |   |   |
| 20738 | 208.736740112305 | 0.01 | 1 |   |
| ;     |                  |      |   |   |
| 20739 | 201.97038269043  | 0.00 | 1 |   |
| 20740 | 202.134857177734 | 0.00 | 1 | ; |
| ;     |                  |      |   |   |
| 20741 | 218.368179321289 | 0.07 | 1 |   |
| ;     |                  |      |   |   |
| 20742 | 215.090637207031 | 0.00 | 1 |   |
| ;     |                  |      |   |   |
| 20743 | 205.432418823242 | 0.03 | 1 |   |
| ;     |                  |      |   |   |
| 20744 | 205.758041381836 | 0.01 | 1 |   |
| ;     |                  |      |   |   |
| 20745 | 220.508697509766 | 0.03 | 1 |   |
| ;     |                  |      |   |   |
| 20746 | 211.583648681641 | 0.03 | 1 |   |
| ;     |                  |      |   |   |

|       |                  |      |   |   |
|-------|------------------|------|---|---|
| 20747 | 211.506561279297 | 0.04 | 1 |   |
| ;     |                  |      |   |   |
| 20748 | 222.029403686523 | 0.03 | 1 |   |
| ;     |                  |      |   |   |
| 20749 | 236.463241577148 | 0.00 | 1 |   |
| ;     |                  |      |   |   |
| 20750 | 236.796417236328 | 0.00 | 1 |   |
| ;     |                  |      |   |   |
| 20751 | 197.27522277832  | 0.02 | 1 | ; |
| 20752 | 197.398345947266 | 0.01 | 1 |   |
| ;     |                  |      |   |   |
| 20753 | 210.747421264648 | 0.01 | 1 |   |
| ;     |                  |      |   |   |
| 20754 | 210.973190307617 | 0.03 | 1 |   |
| ;     |                  |      |   |   |
| 20755 | 210.93440246582  | 0.02 | 1 | ; |
| 20756 | 227.743698120117 | 0.00 | 1 |   |
| ;     |                  |      |   |   |
| 20757 | 225              | 0.04 | 1 | ; |
| 20758 | 214.545928955078 | 0.00 | 1 |   |
| ;     |                  |      |   |   |
| 20759 | 205              | 0.04 | 1 | ; |
| 20760 | 220.167205810547 | 0.00 | 1 |   |
| ;     |                  |      |   |   |
| 20761 | 223.255065917969 | 0.00 | 1 |   |
| ;     |                  |      |   |   |
| 20762 | 234.640884399414 | 0.01 | 1 |   |
| ;     |                  |      |   |   |
| 20763 | 219.132614135742 | 0.05 | 1 |   |
| ;     |                  |      |   |   |
| 20764 | 192.569152832031 | 0.02 | 1 |   |
| ;     |                  |      |   |   |
| 20765 | 192.855438232422 | 0.02 | 1 |   |
| ;     |                  |      |   |   |
| 20766 | 192.367782592773 | 0.01 | 1 |   |
| ;     |                  |      |   |   |
| 20767 | 228.660614013672 | 0.03 | 1 |   |
| ;     |                  |      |   |   |
| 20768 | 227.650817871094 | 0.03 | 1 |   |
| ;     |                  |      |   |   |
| 20769 | 225.834762573242 | 0.00 | 1 |   |
| ;     |                  |      |   |   |
| 20770 | 205.682388305664 | 0.01 | 1 |   |
| ;     |                  |      |   |   |
| 20771 | 205.703811645508 | 0.00 | 1 |   |
| ;     |                  |      |   |   |
| 20772 | 200.468292236328 | 0.03 | 1 |   |
| ;     |                  |      |   |   |
| 20773 | 206.288711547852 | 0.00 | 1 |   |
| ;     |                  |      |   |   |

|       |                  |      |   |  |
|-------|------------------|------|---|--|
| 20774 | 191.374923706055 | 0.04 | 1 |  |
| ;     |                  |      |   |  |
| 20775 | 190.856735229492 | 0.03 | 1 |  |
| ;     |                  |      |   |  |
| 20776 | 205.99755859375  | 0.00 | 1 |  |
| 20777 | 206.326629638672 | 0.02 | 1 |  |
| ;     |                  |      |   |  |
| 20778 | 206.281829833984 | 0.02 | 1 |  |
| ;     |                  |      |   |  |
| 20779 | 206.943908691406 | 0.01 | 1 |  |
| ;     |                  |      |   |  |
| 20780 | 212.098587036133 | 0.00 | 1 |  |
| ;     |                  |      |   |  |
| 20781 | 218.905471801758 | 0.02 | 1 |  |
| ;     |                  |      |   |  |
| 20782 | 220.244644165039 | 0.00 | 1 |  |
| ;     |                  |      |   |  |
| 20783 | 207.631469726563 | 0.02 | 1 |  |
| ;     |                  |      |   |  |
| 20784 | 207.853240966797 | 0.02 | 1 |  |
| ;     |                  |      |   |  |
| 20785 | 205.463592529297 | 0.03 | 1 |  |
| ;     |                  |      |   |  |
| 20786 | 205.461807250977 | 0.05 | 1 |  |
| ;     |                  |      |   |  |
| 20787 | 205.669128417969 | 0.01 | 1 |  |
| ;     |                  |      |   |  |
| 20788 | 205.366607666016 | 0.00 | 1 |  |
| ;     |                  |      |   |  |
| 20789 | 205.374694824219 | 0.04 | 1 |  |
| ;     |                  |      |   |  |
| 20790 | 205.637817382813 | 0.05 | 1 |  |
| ;     |                  |      |   |  |
| 20791 | 203.378494262695 | 0.01 | 1 |  |
| ;     |                  |      |   |  |
| 20792 | 233.263427734375 | 0.05 | 1 |  |
| ;     |                  |      |   |  |
| 20793 | 226.695785522461 | 0.00 | 1 |  |
| ;     |                  |      |   |  |
| 20794 | 226.678085327148 | 0.06 | 1 |  |
| ;     |                  |      |   |  |
| 20795 | 226.499420166016 | 0.01 | 1 |  |
| ;     |                  |      |   |  |
| 20796 | 226.517242431641 | 0.04 | 1 |  |
| ;     |                  |      |   |  |
| 20797 | 223.353225708008 | 0.01 | 1 |  |
| ;     |                  |      |   |  |
| 20798 | 223.374664306641 | 0.01 | 1 |  |
| ;     |                  |      |   |  |
| 20799 | 224.24674987793  | 0.07 | 1 |  |

|       |                  |      |   |   |
|-------|------------------|------|---|---|
| 20800 | 224.274642944336 | 0.02 | 1 |   |
| ;     |                  |      |   |   |
| 20801 | 205.857650756836 | 0.04 | 1 |   |
| ;     |                  |      |   |   |
| 20802 | 205.836380004883 | 0.00 | 1 |   |
| ;     |                  |      |   |   |
| 20803 | 205.829223632813 | 0.00 | 1 |   |
| ;     |                  |      |   |   |
| 20804 | 205.849533081055 | 0.03 | 1 |   |
| ;     |                  |      |   |   |
| 20805 | 231.869369506836 | 0.01 | 1 |   |
| ;     |                  |      |   |   |
| 20806 | 231.88720703125  | 0.02 | 1 | ; |
| 20807 | 229.12841796875  | 0.00 | 1 | ; |
| 20808 | 229.138488769531 | 0.08 | 1 |   |
| ;     |                  |      |   |   |
| 20809 | 229.857696533203 | 0.01 | 1 |   |
| ;     |                  |      |   |   |
| 20810 | 231.195526123047 | 0.01 | 1 |   |
| ;     |                  |      |   |   |
| 20811 | 230.179473876953 | 0.01 | 1 |   |
| ;     |                  |      |   |   |
| 20812 | 230.182434082031 | 0.01 | 1 |   |
| ;     |                  |      |   |   |
| 20813 | 230.847106933594 | 0.01 | 1 |   |
| ;     |                  |      |   |   |
| 20814 | 230.854888916016 | 0.01 | 1 |   |
| ;     |                  |      |   |   |
| 20815 | 234.262512207031 | 0.01 | 1 |   |
| ;     |                  |      |   |   |
| 20816 | 233.913986206055 | 0.01 | 1 |   |
| ;     |                  |      |   |   |
| 20817 | 212.960052490234 | 0.03 | 1 |   |
| ;     |                  |      |   |   |
| 20818 | 213.704925537109 | 0.03 | 1 |   |
| ;     |                  |      |   |   |
| 20819 | 213.709335327148 | 0.03 | 1 |   |
| ;     |                  |      |   |   |
| 20820 | 214.552337646484 | 0.03 | 1 |   |
| ;     |                  |      |   |   |
| 20821 | 209.828735351563 | 0.01 | 1 |   |
| ;     |                  |      |   |   |
| 20822 | 209.812164306641 | 0.00 | 1 |   |
| ;     |                  |      |   |   |
| 20823 | 209.847763061523 | 0.00 | 1 |   |
| ;     |                  |      |   |   |
| 20824 | 227.489593505859 | 0.01 | 1 |   |
| ;     |                  |      |   |   |
| 20825 | 223.079803466797 | 0.02 | 1 |   |
| ;     |                  |      |   |   |



|       |                      |      |   |   |
|-------|----------------------|------|---|---|
| 20826 | 223.065200805664     | 0.01 | 1 |   |
| ;     |                      |      |   |   |
| 20827 | 222.666519165039     | 0.01 | 1 |   |
| ;     |                      |      |   |   |
| 20828 | 222.65119934082 0.00 |      | 1 | ; |
| 20829 | 222.182388305664     | 0.00 | 1 |   |
| ;     |                      |      |   |   |
| 20830 | 222.171325683594     | 0.00 | 1 |   |
| ;     |                      |      |   |   |
| 20831 | 221.870223999023     | 0.02 | 1 |   |
| ;     |                      |      |   |   |
| 20832 | 221.85302734375 0.01 |      | 1 | ; |
| 20833 | 222.05224609375 0.00 |      | 1 | ; |
| 20834 | 222.074432373047     | 0.01 | 1 |   |
| ;     |                      |      |   |   |
| 20835 | 217.284759521484     | 0.09 | 1 |   |
| ;     |                      |      |   |   |
| 20836 | 217.298431396484     | 0.01 | 1 |   |
| ;     |                      |      |   |   |
| 20837 | 195.495574951172     | 0.01 | 1 |   |
| ;     |                      |      |   |   |
| 20838 | 195.48486328125 0.00 |      | 1 | ; |
| 20839 | 194.883636474609     | 0.00 | 1 |   |
| ;     |                      |      |   |   |
| 20840 | 194.879791259766     | 0.00 | 1 |   |
| ;     |                      |      |   |   |
| 20841 | 224.195877075195     | 0.03 | 1 |   |
| ;     |                      |      |   |   |
| 20842 | 223.812149047852     | 0.05 | 1 |   |
| ;     |                      |      |   |   |
| 20843 | 200 0.01             |      | 1 | ; |
| 20844 | 200 0.04             |      | 1 | ; |
| 20845 | 215.798690795898     | 0.01 | 1 |   |
| ;     |                      |      |   |   |
| 20846 | 215.523086547852     | 0.01 | 1 |   |
| ;     |                      |      |   |   |
| 20847 | 215.236282348633     | 0.03 | 1 |   |
| ;     |                      |      |   |   |
| 20848 | 215.527130126953     | 0.03 | 1 |   |
| ;     |                      |      |   |   |
| 20849 | 230.108383178711     | 0.04 | 1 |   |
| ;     |                      |      |   |   |
| 20850 | 230.152847290039     | 0.00 | 1 |   |
| ;     |                      |      |   |   |
| 20851 | 229.304412841797     | 0.03 | 1 |   |
| ;     |                      |      |   |   |
| 20852 | 235.024719238281     | 0.05 | 1 |   |
| ;     |                      |      |   |   |
| 20853 | 235.000701904297     | 0.00 | 1 |   |
| ;     |                      |      |   |   |

|       |                  |      |   |  |
|-------|------------------|------|---|--|
| 20854 | 200              | 0.03 | 1 |  |
| 20855 | 205.838455200195 | 0.06 | 1 |  |
| ;     |                  |      |   |  |
| 20856 | 234.740051269531 | 0.02 | 1 |  |
| ;     |                  |      |   |  |
| 20857 | 234.048080444336 | 0.00 | 1 |  |
| ;     |                  |      |   |  |
| 20858 | 202.66145324707  | 0.01 | 1 |  |
| 20859 | 201.655075073242 | 0.03 | 1 |  |
| ;     |                  |      |   |  |
| 20860 | 203.080307006836 | 0.03 | 1 |  |
| ;     |                  |      |   |  |
| 20861 | 202.138061523438 | 0.03 | 1 |  |
| ;     |                  |      |   |  |
| 20862 | 203.852508544922 | 0.02 | 1 |  |
| ;     |                  |      |   |  |
| 20863 | 202.610824584961 | 0.06 | 1 |  |
| ;     |                  |      |   |  |
| 20864 | 205.799209594727 | 0.02 | 1 |  |
| ;     |                  |      |   |  |
| 20865 | 202.823150634766 | 0.02 | 1 |  |
| ;     |                  |      |   |  |
| 20866 | 200.64436340332  | 0.00 | 1 |  |
| 20867 | 200.994033813477 | 0.00 | 1 |  |
| ;     |                  |      |   |  |
| 20868 | 201.721923828125 | 0.01 | 1 |  |
| ;     |                  |      |   |  |
| 20869 | 201.863677978516 | 0.01 | 1 |  |
| ;     |                  |      |   |  |
| 20870 | 205.476974487305 | 0.07 | 1 |  |
| ;     |                  |      |   |  |
| 20871 | 205.177749633789 | 0.03 | 1 |  |
| ;     |                  |      |   |  |
| 20872 | 220.988494873047 | 0.02 | 1 |  |
| ;     |                  |      |   |  |
| 20873 | 213.750457763672 | 0.04 | 1 |  |
| ;     |                  |      |   |  |
| 20874 | 213.544464111328 | 0.02 | 1 |  |
| ;     |                  |      |   |  |
| 20875 | 214.565719604492 | 0.00 | 1 |  |
| ;     |                  |      |   |  |
| 20876 | 214.296646118164 | 0.02 | 1 |  |
| ;     |                  |      |   |  |
| 20877 | 214.203475952148 | 0.02 | 1 |  |
| ;     |                  |      |   |  |
| 20878 | 214.028060913086 | 0.02 | 1 |  |
| ;     |                  |      |   |  |
| 20879 | 206.183151245117 | 0.05 | 1 |  |
| ;     |                  |      |   |  |
| 20880 | 205.841598510742 | 0.12 | 1 |  |

|       |                      |      |   |   |
|-------|----------------------|------|---|---|
| ;     |                      |      |   |   |
| 20881 | 212.098068237305     | 0.02 | 1 |   |
| ;     |                      |      |   |   |
| 20882 | 211.957641601562     | 0.03 | 1 |   |
| ;     |                      |      |   |   |
| 20883 | 211.510116577148     | 0.05 | 1 |   |
| ;     |                      |      |   |   |
| 20884 | 211.819595336914     | 0.05 | 1 |   |
| ;     |                      |      |   |   |
| 20885 | 210.937301635742     | 0.03 | 1 |   |
| ;     |                      |      |   |   |
| 20886 | 207.37580871582 0.02 |      | 1 | ; |
| 20887 | 208.498901367188     | 0.03 | 1 |   |
| ;     |                      |      |   |   |
| 20888 | 213.571884155273     | 0.06 | 1 |   |
| ;     |                      |      |   |   |
| 20889 | 213.057373046875     | 0.07 | 1 |   |
| ;     |                      |      |   |   |
| 20890 | 198.423767089844     | 0.06 | 1 |   |
| ;     |                      |      |   |   |
| 20891 | 195.809158325195     | 0.08 | 1 |   |
| ;     |                      |      |   |   |
| 20892 | 214.944915771484     | 0.02 | 1 |   |
| ;     |                      |      |   |   |
| 20893 | 212.43830871582 0.01 |      | 1 | ; |
| 20894 | 211.706802368164     | 0.00 | 1 |   |
| ;     |                      |      |   |   |
| 20895 | 211.805587768555     | 0.00 | 1 |   |
| ;     |                      |      |   |   |
| 20896 | 214.146957397461     | 0.01 | 1 |   |
| ;     |                      |      |   |   |
| 20897 | 214.847381591797     | 0.01 | 1 |   |
| ;     |                      |      |   |   |
| 20898 | 207.624694824219     | 0.08 | 1 |   |
| ;     |                      |      |   |   |
| 20899 | 207.884887695313     | 0.14 | 1 |   |
| ;     |                      |      |   |   |
| 20900 | 209.238540649414     | 0.05 | 1 |   |
| ;     |                      |      |   |   |
| 20901 | 205.964172363281     | 0.00 | 1 |   |
| ;     |                      |      |   |   |
| 20902 | 206.062377929688     | 0.00 | 1 |   |
| ;     |                      |      |   |   |
| 20903 | 209.533004760742     | 0.05 | 1 |   |
| ;     |                      |      |   |   |
| 20904 | 209.646224975586     | 0.01 | 1 |   |
| ;     |                      |      |   |   |
| 20905 | 202.485046386719     | 0.00 | 1 |   |
| ;     |                      |      |   |   |
| 20906 | 202.737777709961     | 0.00 | 1 |   |

|       |                      |      |   |   |   |
|-------|----------------------|------|---|---|---|
| ;     |                      |      |   |   |   |
| 20907 | 202.888381958008     | 0.01 |   | 1 |   |
| ;     |                      |      |   |   |   |
| 20908 | 207.483871459961     | 0.02 |   | 1 |   |
| ;     |                      |      |   |   |   |
| 20909 | 207.473571777344     | 0.00 |   | 1 |   |
| ;     |                      |      |   |   |   |
| 20910 | 211.553787231445     | 0.00 |   | 1 |   |
| ;     |                      |      |   |   |   |
| 20911 | 211.989318847656     | 0.04 |   | 1 |   |
| ;     |                      |      |   |   |   |
| 20912 | 212.983551025391     | 0.00 |   | 1 |   |
| ;     |                      |      |   |   |   |
| 20913 | 214.531585693359     | 0.00 |   | 1 |   |
| ;     |                      |      |   |   |   |
| 20914 | 214.555511474609     | 0.00 |   | 1 |   |
| ;     |                      |      |   |   |   |
| 20915 | 205.312774658203     | 0.01 |   | 1 |   |
| ;     |                      |      |   |   |   |
| 20916 | 205.233749389648     | 0.01 |   | 1 |   |
| ;     |                      |      |   |   |   |
| 20917 | 205.241424560547     | 0.08 |   | 1 |   |
| ;     |                      |      |   |   |   |
| 20918 | 201.23681640625 0.04 |      | 1 |   | ; |
| 20919 | 203.071304321289     | 0.05 |   | 1 |   |
| ;     |                      |      |   |   |   |
| 20920 | 203.054397583008     | 0.06 |   | 1 |   |
| ;     |                      |      |   |   |   |
| 20921 | 202.82942199707 0.02 |      | 1 |   | ; |
| 20922 | 208.345413208008     | 0.16 |   | 1 |   |
| ;     |                      |      |   |   |   |
| 20923 | 209.020233154297     | 0.15 |   | 1 |   |
| ;     |                      |      |   |   |   |
| 20924 | 211.240447998047     | 0.06 |   | 1 |   |
| ;     |                      |      |   |   |   |
| 20925 | 211.225830078125     | 0.01 |   | 1 |   |
| ;     |                      |      |   |   |   |
| 20926 | 219.837203979492     | 0.02 |   | 1 |   |
| ;     |                      |      |   |   |   |
| 20927 | 219.821166992188     | 0.00 |   | 1 |   |
| ;     |                      |      |   |   |   |
| 20928 | 220.687942504883     | 0.03 |   | 1 |   |
| ;     |                      |      |   |   |   |
| 20929 | 220.370819091797     | 0.01 |   | 1 |   |
| ;     |                      |      |   |   |   |
| 20930 | 196.25471496582 0.00 |      | 1 |   | ; |
| 20931 | 195.867309570312     | 0.01 |   | 1 |   |
| ;     |                      |      |   |   |   |
| 20932 | 236.848770141602     | 0.00 |   | 1 |   |
| ;     |                      |      |   |   |   |

|       |                  |      |   |   |
|-------|------------------|------|---|---|
| 20933 | 236.850708007813 | 0.05 | 1 |   |
| ;     |                  |      |   |   |
| 20934 | 219.881134033203 | 0.03 | 1 |   |
| ;     |                  |      |   |   |
| 20935 | 219.866668701172 | 0.02 | 1 |   |
| ;     |                  |      |   |   |
| 20936 | 225.710479736328 | 0.06 | 1 |   |
| ;     |                  |      |   |   |
| 20937 | 235.492813110352 | 0.01 | 1 |   |
| ;     |                  |      |   |   |
| 20938 | 197.164428710938 | 0.01 | 1 |   |
| ;     |                  |      |   |   |
| 20939 | 212.683319091797 | 0.02 | 1 |   |
| ;     |                  |      |   |   |
| 20940 | 196.714736938477 | 0.15 | 1 |   |
| ;     |                  |      |   |   |
| 20941 | 198.796813964844 | 0.00 | 1 |   |
| ;     |                  |      |   |   |
| 20942 | 219.190353393555 | 0.04 | 1 |   |
| ;     |                  |      |   |   |
| 20943 | 219.187866210938 | 0.00 | 1 |   |
| ;     |                  |      |   |   |
| 20944 | 221.148376464844 | 0.03 | 1 |   |
| ;     |                  |      |   |   |
| 20945 | 204.376693725586 | 0.04 | 1 |   |
| ;     |                  |      |   |   |
| 20946 | 204.370025634766 | 0.07 | 1 |   |
| ;     |                  |      |   |   |
| 20947 | 205.282958984375 | 0.05 | 1 |   |
| ;     |                  |      |   |   |
| 20948 | 201.92268371582  | 0.03 | 1 | ; |
| 20949 | 209.75           | 0.00 | 1 | ; |
| 20950 | 230.974044799805 | 0.01 | 1 |   |
| ;     |                  |      |   |   |
| 20951 | 230.948440551758 | 0.01 | 1 |   |
| ;     |                  |      |   |   |
| 20952 | 231.873748779297 | 0.04 | 1 |   |
| ;     |                  |      |   |   |
| 20953 | 231.87141418457  | 0.03 | 1 | ; |
| 20954 | 232.150115966797 | 0.10 | 1 |   |
| ;     |                  |      |   |   |
| 20955 | 232.138519287109 | 0.02 | 1 |   |
| ;     |                  |      |   |   |
| 20956 | 221.679885864258 | 0.01 | 1 |   |
| ;     |                  |      |   |   |
| 20957 | 221.68049621582  | 0.04 | 1 | ; |
| 20958 | 208.225524902344 | 0.03 | 1 |   |
| ;     |                  |      |   |   |
| 20959 | 208.376037597656 | 0.00 | 1 |   |
| ;     |                  |      |   |   |

|       |                  |      |   |   |
|-------|------------------|------|---|---|
| 20960 | 233.879302978516 | 0.04 | 1 |   |
| ;     |                  |      |   |   |
| 20961 | 204.647445678711 | 0.00 | 1 |   |
| ;     |                  |      |   |   |
| 20962 | 202.541885375977 | 0.04 | 1 |   |
| ;     |                  |      |   |   |
| 20963 | 219.7177734375   | 0.04 | 1 | ; |
| 20964 | 230.367904663086 | 0.07 | 1 |   |
| ;     |                  |      |   |   |
| 20965 | 231.82470703125  | 0.07 | 1 | ; |
| 20966 | 221.938079833984 | 0.03 | 1 |   |
| ;     |                  |      |   |   |
| 20967 | 196.662231445313 | 0.02 | 1 |   |
| ;     |                  |      |   |   |
| 20968 | 219.452926635742 | 0.04 | 1 |   |
| ;     |                  |      |   |   |
| 20969 | 221.995483398438 | 0.02 | 1 |   |
| ;     |                  |      |   |   |
| 20970 | 219.005737304688 | 0.00 | 1 |   |
| ;     |                  |      |   |   |
| 20971 | 195.190444946289 | 0.01 | 1 |   |
| ;     |                  |      |   |   |
| 20972 | 195.731170654297 | 0.00 | 1 |   |
| ;     |                  |      |   |   |
| 20973 | 195.142639160156 | 0.01 | 1 |   |
| ;     |                  |      |   |   |
| 20974 | 195.747528076172 | 0.01 | 1 |   |
| ;     |                  |      |   |   |
| 20975 | 195.149810791016 | 0.02 | 1 |   |
| ;     |                  |      |   |   |
| 20976 | 195.84716796875  | 0.01 | 1 | ; |
| 20977 | 196.296569824219 | 0.07 | 1 |   |
| ;     |                  |      |   |   |
| 20978 | 205              | 0.01 | 1 | ; |
| 20979 | 220              | 0.02 | 1 | ; |
| 20980 | 209.653030395508 | 0.10 | 1 |   |
| ;     |                  |      |   |   |
| 20981 | 209.985992431641 | 0.02 | 1 |   |
| ;     |                  |      |   |   |
| 20982 | 210.387222290039 | 0.07 | 1 |   |
| ;     |                  |      |   |   |
| 20983 | 198.64030456543  | 0.00 | 1 | ; |
| 20984 | 215.640960693359 | 0.00 | 1 |   |
| ;     |                  |      |   |   |
| 20985 | 215.120468139648 | 0.00 | 1 |   |
| ;     |                  |      |   |   |
| 20986 | 217.202117919922 | 0.02 | 1 |   |
| ;     |                  |      |   |   |
| 20987 | 217.511734008789 | 0.02 | 1 |   |
| ;     |                  |      |   |   |

|       |                  |      |   |   |
|-------|------------------|------|---|---|
| 20988 | 216.924057006836 | 0.02 | 1 |   |
| ;     |                  |      |   |   |
| 20989 | 217.317764282227 | 0.02 | 1 |   |
| ;     |                  |      |   |   |
| 20990 | 205.636291503906 | 0.01 | 1 |   |
| ;     |                  |      |   |   |
| 20991 | 206.731872558594 | 0.01 | 1 |   |
| ;     |                  |      |   |   |
| 20992 | 206.866973876953 | 0.04 | 1 |   |
| ;     |                  |      |   |   |
| 20993 | 206.220855712891 | 0.01 | 1 |   |
| ;     |                  |      |   |   |
| 20994 | 206.432159423828 | 0.01 | 1 |   |
| ;     |                  |      |   |   |
| 20995 | 206.098495483398 | 0.03 | 1 |   |
| ;     |                  |      |   |   |
| 20996 | 206.130462646484 | 0.03 | 1 |   |
| ;     |                  |      |   |   |
| 20997 | 217.880355834961 | 0.00 | 1 |   |
| ;     |                  |      |   |   |
| 20998 | 214.576721191406 | 0.01 | 1 |   |
| ;     |                  |      |   |   |
| 20999 | 214.598129272461 | 0.02 | 1 |   |
| ;     |                  |      |   |   |
| 21000 | 214.072311401367 | 0.02 | 1 |   |
| ;     |                  |      |   |   |
| 21001 | 214.454010009766 | 0.01 | 1 |   |
| ;     |                  |      |   |   |
| 21002 | 213.489151000977 | 0.06 | 1 |   |
| ;     |                  |      |   |   |
| 21003 | 213.745819091797 | 0.01 | 1 |   |
| ;     |                  |      |   |   |
| 21004 | 213.20573425293  | 0.08 | 1 |   |
| 21005 | 213.467590332031 | 0.17 | 1 | ; |
| ;     |                  |      |   |   |
| 21006 | 201.736679077148 | 0.01 | 1 |   |
| ;     |                  |      |   |   |
| 21007 | 201.982315063477 | 0.04 | 1 |   |
| ;     |                  |      |   |   |
| 21008 | 201.885345458984 | 0.01 | 1 |   |
| ;     |                  |      |   |   |
| 21009 | 201.889312744141 | 0.01 | 1 |   |
| ;     |                  |      |   |   |
| 21010 | 201.370025634766 | 0.06 | 1 |   |
| ;     |                  |      |   |   |
| 21011 | 201.24658203125  | 0.03 | 1 |   |
| 21012 | 209.190551757813 | 0.04 | 1 | ; |
| ;     |                  |      |   |   |
| 21013 | 209.176177978516 | 0.01 | 1 |   |
| ;     |                  |      |   |   |

|       |                  |      |   |   |
|-------|------------------|------|---|---|
| 21014 | 209.501800537109 | 0.04 | 1 |   |
| ;     |                  |      |   |   |
| 21015 | 209.505767822266 | 0.03 | 1 |   |
| ;     |                  |      |   |   |
| 21016 | 209.386322021484 | 0.02 | 1 |   |
| ;     |                  |      |   |   |
| 21017 | 209.400924682617 | 0.00 | 1 |   |
| ;     |                  |      |   |   |
| 21018 | 210.188980102539 | 0.03 | 1 |   |
| ;     |                  |      |   |   |
| 21019 | 210.171127319336 | 0.00 | 1 |   |
| ;     |                  |      |   |   |
| 21020 | 216.7490234375   | 0.06 | 1 |   |
| 21021 | 216.763580322266 | 0.00 | 1 | ; |
| ;     |                  |      |   |   |
| 21022 | 219.858505249023 | 0.01 | 1 |   |
| ;     |                  |      |   |   |
| 21023 | 200.399841308594 | 0.05 | 1 |   |
| ;     |                  |      |   |   |
| 21024 | 200.690338134766 | 0.01 | 1 |   |
| ;     |                  |      |   |   |
| 21025 | 200.332153320313 | 0.01 | 1 |   |
| ;     |                  |      |   |   |
| 21026 | 200.078567504883 | 0.01 | 1 |   |
| ;     |                  |      |   |   |
| 21027 | 204.139892578125 | 0.01 | 1 |   |
| ;     |                  |      |   |   |
| 21028 | 214.707305908203 | 0.01 | 1 |   |
| ;     |                  |      |   |   |
| 21029 | 214.443435668945 | 0.04 | 1 |   |
| ;     |                  |      |   |   |
| 21030 | 197.427185058594 | 0.02 | 1 |   |
| ;     |                  |      |   |   |
| 21031 | 197.400039672852 | 0.00 | 1 |   |
| ;     |                  |      |   |   |
| 21032 | 196.646591186523 | 0.01 | 1 |   |
| ;     |                  |      |   |   |
| 21033 | 196.607833862305 | 0.00 | 1 |   |
| ;     |                  |      |   |   |
| 21034 | 215.443054199219 | 0.01 | 1 |   |
| ;     |                  |      |   |   |
| 21035 | 215.435516357422 | 0.01 | 1 |   |
| ;     |                  |      |   |   |
| 21036 | 214.916275024414 | 0.00 | 1 |   |
| ;     |                  |      |   |   |
| 21037 | 216.319000244141 | 0.00 | 1 |   |
| ;     |                  |      |   |   |
| 21038 | 213.869781494141 | 0.02 | 1 |   |
| ;     |                  |      |   |   |
| 21039 | 214.286727905273 | 0.00 | 1 |   |



|       |                  |      |  |   |   |   |
|-------|------------------|------|--|---|---|---|
| ;     |                  |      |  |   |   |   |
| 21040 | 206.893951416016 | 0.01 |  | 1 |   |   |
| ;     |                  |      |  |   |   |   |
| 21041 | 206.883117675781 | 0.04 |  | 1 |   |   |
| ;     |                  |      |  |   |   |   |
| 21042 | 199.350631713867 | 0.01 |  | 1 |   |   |
| ;     |                  |      |  |   |   |   |
| 21043 | 200              | 0.02 |  | 1 |   | ; |
| 21044 | 200              | 0.02 |  | 1 |   | ; |
| 21045 | 197.205917358398 | 0.00 |  |   | 1 |   |
| ;     |                  |      |  |   |   |   |
| 21046 | 214.877197265625 | 0.01 |  |   | 1 |   |
| ;     |                  |      |  |   |   |   |
| 21047 | 214.891052246094 | 0.00 |  |   | 1 |   |
| ;     |                  |      |  |   |   |   |
| 21048 | 207.317596435547 | 0.02 |  |   | 1 |   |
| ;     |                  |      |  |   |   |   |
| 21049 | 199.237121582031 | 0.03 |  |   | 1 |   |
| ;     |                  |      |  |   |   |   |
| 21050 | 219.799667358398 | 0.02 |  |   | 1 |   |
| ;     |                  |      |  |   |   |   |
| 21051 | 219.153717041016 | 0.02 |  |   | 1 |   |
| ;     |                  |      |  |   |   |   |
| 21052 | 219.121704101563 | 0.01 |  |   | 1 |   |
| ;     |                  |      |  |   |   |   |
| 21053 | 204.926315307617 | 0.01 |  |   | 1 |   |
| ;     |                  |      |  |   |   |   |
| 21054 | 205.044738769531 | 0.00 |  |   | 1 |   |
| ;     |                  |      |  |   |   |   |
| 21055 | 203.505096435547 | 0.04 |  |   | 1 |   |
| ;     |                  |      |  |   |   |   |
| 21056 | 231.071365356445 | 0.04 |  |   | 1 |   |
| ;     |                  |      |  |   |   |   |
| 21057 | 230.458755493164 | 0.00 |  |   | 1 |   |
| ;     |                  |      |  |   |   |   |
| 21058 | 228.168914794922 | 0.00 |  |   | 1 |   |
| ;     |                  |      |  |   |   |   |
| 21059 | 227.270706176758 | 0.02 |  |   | 1 |   |
| ;     |                  |      |  |   |   |   |
| 21060 | 204.727523803711 | 0.03 |  |   | 1 |   |
| ;     |                  |      |  |   |   |   |
| 21061 | 218.602416992188 | 0.03 |  |   | 1 |   |
| ;     |                  |      |  |   |   |   |
| 21062 | 218.580108642578 | 0.02 |  |   | 1 |   |
| ;     |                  |      |  |   |   |   |
| 21063 | 210              | 0.00 |  | 1 |   | ; |
| 21064 | 210              | 0.00 |  | 1 |   | ; |
| 21065 | 218.235427856445 | 0.01 |  |   | 1 |   |
| ;     |                  |      |  |   |   |   |
| 21066 | 217.505798339844 | 0.02 |  |   | 1 |   |

|       |                  |      |   |   |   |
|-------|------------------|------|---|---|---|
| ;     |                  |      |   |   |   |
| 21067 | 218.860000610352 | 0.01 |   | 1 |   |
| ;     |                  |      |   |   |   |
| 21068 | 218.763092041016 | 0.00 |   | 1 |   |
| ;     |                  |      |   |   |   |
| 21069 | 209.352416992188 | 0.01 |   | 1 |   |
| ;     |                  |      |   |   |   |
| 21070 | 209.465347290039 | 0.01 |   | 1 |   |
| ;     |                  |      |   |   |   |
| 21071 | 209.580749511719 | 0.04 |   | 1 |   |
| ;     |                  |      |   |   |   |
| 21072 | 209.074279785156 | 0.04 |   | 1 |   |
| ;     |                  |      |   |   |   |
| 21073 | 209.908996582031 | 0.05 |   | 1 |   |
| ;     |                  |      |   |   |   |
| 21074 | 209.467498779297 | 0.05 |   | 1 |   |
| ;     |                  |      |   |   |   |
| 21075 | 209.780410766602 | 0.02 |   | 1 |   |
| ;     |                  |      |   |   |   |
| 21076 | 209.069595336914 | 0.00 |   | 1 |   |
| ;     |                  |      |   |   |   |
| 21077 | 209.132888793945 | 0.01 |   | 1 |   |
| ;     |                  |      |   |   |   |
| 21078 | 218.35888671875  | 0.00 | 1 |   | ; |
| 21079 | 218.367858886719 | 0.02 |   | 1 |   |
| ;     |                  |      |   |   |   |
| 21080 | 210.213394165039 | 0.01 |   | 1 |   |
| ;     |                  |      |   |   |   |
| 21081 | 205.777084350586 | 0.01 |   | 1 |   |
| ;     |                  |      |   |   |   |
| 21082 | 205.779937744141 | 0.01 |   | 1 |   |
| ;     |                  |      |   |   |   |
| 21083 | 203.965148925781 | 0.00 |   | 1 |   |
| ;     |                  |      |   |   |   |
| 21084 | 203.981689453125 | 0.04 |   | 1 |   |
| ;     |                  |      |   |   |   |
| 21085 | 207.05891418457  | 0.01 | 1 |   | ; |
| 21086 | 207.065078735352 | 0.01 |   | 1 |   |
| ;     |                  |      |   |   |   |
| 21087 | 212.378280639648 | 0.01 |   | 1 |   |
| ;     |                  |      |   |   |   |
| 21088 | 212.384552001953 | 0.02 |   | 1 |   |
| ;     |                  |      |   |   |   |
| 21089 | 212.610504150391 | 0.00 |   | 1 |   |
| ;     |                  |      |   |   |   |
| 21090 | 212.600311279297 | 0.04 |   | 1 |   |
| ;     |                  |      |   |   |   |
| 21091 | 199.59765625     | 0.00 | 1 |   | ; |
| 21092 | 200.189819335938 | 0.02 |   | 1 |   |
| ;     |                  |      |   |   |   |

|       |                  |      |   |   |
|-------|------------------|------|---|---|
| 21093 | 200.201553344727 | 0.03 | 1 |   |
| ;     |                  |      |   |   |
| 21094 | 199.420455932617 | 0.01 | 1 |   |
| ;     |                  |      |   |   |
| 21095 | 209.518829345703 | 0.04 | 1 |   |
| ;     |                  |      |   |   |
| 21096 | 194.021179199219 | 0.03 | 1 |   |
| ;     |                  |      |   |   |
| 21097 | 193.64958190918  | 0.03 | 1 |   |
| 21098 | 194.772369384766 | 0.04 | 1 | ; |
| ;     |                  |      |   |   |
| 21099 | 194.880584716797 | 0.04 | 1 |   |
| ;     |                  |      |   |   |
| 21100 | 195.646575927734 | 0.02 | 1 |   |
| ;     |                  |      |   |   |
| 21101 | 195.864334106445 | 0.07 | 1 |   |
| ;     |                  |      |   |   |
| 21102 | 209.982894897461 | 0.02 | 1 |   |
| ;     |                  |      |   |   |
| 21103 | 213.073974609375 | 0.04 | 1 |   |
| ;     |                  |      |   |   |
| 21104 | 215.120315551758 | 0.01 | 1 |   |
| ;     |                  |      |   |   |
| 21105 | 215.023101806641 | 0.01 | 1 |   |
| ;     |                  |      |   |   |
| 21106 | 208.384368896484 | 0.03 | 1 |   |
| ;     |                  |      |   |   |
| 21107 | 208.679931640625 | 0.03 | 1 |   |
| ;     |                  |      |   |   |
| 21108 | 217.478210449219 | 0.00 | 1 |   |
| ;     |                  |      |   |   |
| 21109 | 217.560302734375 | 0.00 | 1 |   |
| ;     |                  |      |   |   |
| 21110 | 217.574661254883 | 0.00 | 1 |   |
| ;     |                  |      |   |   |
| 21111 | 217.573577880859 | 0.01 | 1 |   |
| ;     |                  |      |   |   |
| 21112 | 208.361846923828 | 0.00 | 1 |   |
| ;     |                  |      |   |   |
| 21113 | 208.37174987793  | 0.00 | 1 |   |
| 21114 | 195.117797851563 | 0.04 | 1 | ; |
| ;     |                  |      |   |   |
| 21115 | 195.371597290039 | 0.05 | 1 |   |
| ;     |                  |      |   |   |
| 21116 | 208.05061340332  | 0.00 | 1 | ; |
| 21117 | 208.04638671875  | 0.00 | 1 | ; |
| 21118 | 205              | 0.06 | 1 | ; |
| 21119 | 205.030197143555 | 0.01 | 1 |   |
| ;     |                  |      |   |   |
| 21120 | 205              | 0.03 | 1 | ; |

|       |                  |      |   |   |  |  |
|-------|------------------|------|---|---|--|--|
| 21121 | 205              | 0.10 | 1 |   |  |  |
| 21122 | 197.264343261719 | 0.01 |   | 1 |  |  |
| ;     |                  |      |   |   |  |  |
| 21123 | 196.738143920898 | 0.01 |   | 1 |  |  |
| ;     |                  |      |   |   |  |  |
| 21124 | 207.498275756836 | 0.66 |   | 1 |  |  |
| ;     |                  |      |   |   |  |  |
| 21125 | 207.567687988281 | 0.57 |   | 1 |  |  |
| ;     |                  |      |   |   |  |  |
| 21126 | 206.765426635742 | 0.03 |   | 1 |  |  |
| ;     |                  |      |   |   |  |  |
| 21127 | 206.725112915039 | 0.00 |   | 1 |  |  |
| ;     |                  |      |   |   |  |  |
| 21128 | 216.584487915039 | 0.00 |   | 1 |  |  |
| ;     |                  |      |   |   |  |  |
| 21129 | 216.568099975586 | 0.00 |   | 1 |  |  |
| ;     |                  |      |   |   |  |  |
| 21130 | 217.135314941406 | 0.00 |   | 1 |  |  |
| ;     |                  |      |   |   |  |  |
| 21131 | 216.922210693359 | 0.00 |   | 1 |  |  |
| ;     |                  |      |   |   |  |  |
| 21132 | 215.539337158203 | 0.02 |   | 1 |  |  |
| ;     |                  |      |   |   |  |  |
| 21133 | 216.467147827148 | 0.02 |   | 1 |  |  |
| ;     |                  |      |   |   |  |  |
| 21134 | 216.974975585938 | 0.00 |   | 1 |  |  |
| ;     |                  |      |   |   |  |  |
| 21135 | 195.490478515625 | 0.00 |   | 1 |  |  |
| ;     |                  |      |   |   |  |  |
| 21136 | 195.48681640625  | 0.00 | 1 |   |  |  |
| 21137 | 195.326766967773 | 0.00 |   | 1 |  |  |
| ;     |                  |      |   |   |  |  |
| 21138 | 195.32682800293  | 0.04 | 1 |   |  |  |
| 21139 | 199.402801513672 | 0.03 |   | 1 |  |  |
| ;     |                  |      |   |   |  |  |
| 21140 | 198.986618041992 | 0.00 |   | 1 |  |  |
| ;     |                  |      |   |   |  |  |
| 21141 | 195              | 0.01 | 1 |   |  |  |
| 21142 | 195              | 0.02 | 1 |   |  |  |
| 21143 | 199.48600769043  | 0.05 | 1 |   |  |  |
| 21144 | 197.890731811523 | 0.10 |   | 1 |  |  |
| ;     |                  |      |   |   |  |  |
| 21145 | 198.635330200195 | 0.05 |   | 1 |  |  |
| ;     |                  |      |   |   |  |  |
| 21146 | 196.835357666016 | 0.05 |   | 1 |  |  |
| ;     |                  |      |   |   |  |  |
| 21147 | 194.353012084961 | 0.06 |   | 1 |  |  |
| ;     |                  |      |   |   |  |  |
| 21148 | 195.167526245117 | 0.06 |   | 1 |  |  |
| ;     |                  |      |   |   |  |  |

|       |                  |      |   |   |
|-------|------------------|------|---|---|
| 21149 | 196.836486816406 | 0.05 | 1 |   |
| ;     |                  |      |   |   |
| 21150 | 198.056518554688 | 0.05 | 1 |   |
| ;     |                  |      |   |   |
| 21151 | 195.544219970703 | 0.01 | 1 |   |
| ;     |                  |      |   |   |
| 21152 | 194.347229003906 | 0.00 | 1 |   |
| ;     |                  |      |   |   |
| 21153 | 194.348831176758 | 0.00 | 1 |   |
| ;     |                  |      |   |   |
| 21154 | 195              | 0.02 | 1 |   |
| 21155 | 194.413192749023 | 0.02 | 1 | ; |
| ;     |                  |      |   |   |
| 21156 | 195              | 0.05 | 1 |   |
| 21157 | 193.998870849609 | 0.02 | 1 | ; |
| ;     |                  |      |   |   |
| 21158 | 193.937927246094 | 0.06 | 1 |   |
| ;     |                  |      |   |   |
| 21159 | 196.706604003906 | 0.02 | 1 |   |
| ;     |                  |      |   |   |
| 21160 | 198.886459350586 | 0.00 | 1 |   |
| ;     |                  |      |   |   |
| 21161 | 198.802764892578 | 0.00 | 1 |   |
| ;     |                  |      |   |   |
| 21162 | 198.677551269531 | 0.01 | 1 |   |
| ;     |                  |      |   |   |
| 21163 | 198.771438598633 | 0.01 | 1 |   |
| ;     |                  |      |   |   |
| 21164 | 209.498275756836 | 0.01 | 1 |   |
| ;     |                  |      |   |   |
| 21165 | 210              | 0.06 | 1 |   |
| 21166 | 210.574935913086 | 0.05 | 1 | ; |
| ;     |                  |      |   |   |
| 21167 | 196.476593017578 | 0.01 | 1 |   |
| ;     |                  |      |   |   |
| 21168 | 196.415618896484 | 0.01 | 1 |   |
| ;     |                  |      |   |   |
| 21169 | 196.406860351562 | 0.09 | 1 |   |
| ;     |                  |      |   |   |
| 21170 | 199.203506469727 | 0.01 | 1 |   |
| ;     |                  |      |   |   |
| 21171 | 199.197662353516 | 0.00 | 1 |   |
| ;     |                  |      |   |   |
| 21172 | 201.081192016602 | 0.01 | 1 |   |
| ;     |                  |      |   |   |
| 21173 | 201.066741943359 | 0.08 | 1 |   |
| ;     |                  |      |   |   |
| 21174 | 219.937759399414 | 0.01 | 1 |   |
| ;     |                  |      |   |   |
| 21175 | 219.939331054688 | 0.01 | 1 |   |

|       |                      |      |   |   |   |
|-------|----------------------|------|---|---|---|
| ;     |                      |      |   |   |   |
| 21176 | 218.318054199219     | 0.01 |   | 1 |   |
| ;     |                      |      |   |   |   |
| 21177 | 206.042251586914     | 0.00 |   | 1 |   |
| ;     |                      |      |   |   |   |
| 21178 | 198.248596191406     | 0.05 |   | 1 |   |
| ;     |                      |      |   |   |   |
| 21179 | 198.265640258789     | 0.02 |   | 1 |   |
| ;     |                      |      |   |   |   |
| 21180 | 199.46907043457 0.02 |      | 1 |   | ; |
| 21181 | 199.483596801758     | 0.00 |   | 1 |   |
| ;     |                      |      |   |   |   |
| 21182 | 200 0.01             |      | 1 |   | ; |
| 21183 | 195.067352294922     | 0.01 |   | 1 |   |
| ;     |                      |      |   |   |   |
| 21184 | 195.788360595703     | 0.01 |   | 1 |   |
| ;     |                      |      |   |   |   |
| 21185 | 199.671188354492     | 0.00 |   | 1 |   |
| ;     |                      |      |   |   |   |
| 21186 | 200 0.00             |      | 1 |   | ; |
| 21187 | 196.047088623047     | 0.01 |   | 1 |   |
| ;     |                      |      |   |   |   |
| 21188 | 196.46794128418 0.01 |      | 1 |   | ; |
| 21189 | 198.929489135742     | 0.03 |   | 1 |   |
| ;     |                      |      |   |   |   |
| 21190 | 198.092834472656     | 0.04 |   | 1 |   |
| ;     |                      |      |   |   |   |
| 21191 | 199.012420654297     | 0.02 |   | 1 |   |
| ;     |                      |      |   |   |   |
| 21192 | 199.224655151367     | 0.03 |   | 1 |   |
| ;     |                      |      |   |   |   |
| 21193 | 198.732391357422     | 0.01 |   | 1 |   |
| ;     |                      |      |   |   |   |
| 21194 | 198.663284301758     | 0.01 |   | 1 |   |
| ;     |                      |      |   |   |   |
| 21195 | 198.743988037109     | 0.03 |   | 1 |   |
| ;     |                      |      |   |   |   |
| 21196 | 199.228469848633     | 0.01 |   | 1 |   |
| ;     |                      |      |   |   |   |
| 21197 | 199.362289428711     | 0.01 |   | 1 |   |
| ;     |                      |      |   |   |   |
| 21198 | 199.21760559082 0.01 |      | 1 |   | ; |
| 21199 | 199.10661315918 0.01 |      | 1 |   | ; |
| 21200 | 216.790496826172     | 0.01 |   | 1 |   |
| ;     |                      |      |   |   |   |
| 21201 | 217.142150878906     | 0.02 |   | 1 |   |
| ;     |                      |      |   |   |   |
| 21202 | 217.446014404297     | 0.06 |   | 1 |   |
| ;     |                      |      |   |   |   |
| 21203 | 216.961517333984     | 0.09 |   | 1 |   |

|       |                  |      |   |   |   |
|-------|------------------|------|---|---|---|
| ;     |                  |      |   |   |   |
| 21204 | 195.752334594727 | 0.01 |   | 1 |   |
| ;     |                  |      |   |   |   |
| 21205 | 195.726119995117 | 0.02 |   | 1 |   |
| ;     |                  |      |   |   |   |
| 21206 | 195.653991699219 | 0.00 |   | 1 |   |
| ;     |                  |      |   |   |   |
| 21207 | 195.711242675781 | 0.01 |   | 1 |   |
| ;     |                  |      |   |   |   |
| 21208 | 220              | 0.01 | 1 |   | ; |
| 21209 | 220              | 0.01 | 1 |   | ; |
| 21210 | 220              | 0.01 | 1 |   | ; |
| 21211 | 195.178497314453 | 0.01 |   | 1 |   |
| ;     |                  |      |   |   |   |
| 21212 | 194.603897094727 | 0.01 |   | 1 |   |
| ;     |                  |      |   |   |   |
| 21213 | 194.536956787109 | 0.01 |   | 1 |   |
| ;     |                  |      |   |   |   |
| 21214 | 194.346313476563 | 0.01 |   | 1 |   |
| ;     |                  |      |   |   |   |
| 21215 | 197.119705200195 | 0.04 |   | 1 |   |
| ;     |                  |      |   |   |   |
| 21216 | 197.676712036133 | 0.02 |   | 1 |   |
| ;     |                  |      |   |   |   |
| 21217 | 197.156600952148 | 0.03 |   | 1 |   |
| ;     |                  |      |   |   |   |
| 21218 | 196.946960449219 | 0.03 |   | 1 |   |
| ;     |                  |      |   |   |   |
| 21219 | 210.93473815918  | 0.00 | 1 |   | ; |
| 21220 | 210.916793823242 | 0.00 |   | 1 |   |
| ;     |                  |      |   |   |   |
| 21221 | 211.365997314453 | 0.02 |   | 1 |   |
| ;     |                  |      |   |   |   |
| 21222 | 210.950622558594 | 0.01 |   | 1 |   |
| ;     |                  |      |   |   |   |
| 21223 | 210.574417114258 | 0.09 |   | 1 |   |
| ;     |                  |      |   |   |   |
| 21224 | 210.699432373047 | 0.00 |   | 1 |   |
| ;     |                  |      |   |   |   |
| 21225 | 195.30158996582  | 0.04 | 1 |   | ; |
| 21226 | 195.447998046875 | 0.08 |   | 1 |   |
| ;     |                  |      |   |   |   |
| 21227 | 195.596160888672 | 0.07 |   | 1 |   |
| ;     |                  |      |   |   |   |
| 21228 | 199.967224121094 | 0.03 |   | 1 |   |
| ;     |                  |      |   |   |   |
| 21229 | 199.487319946289 | 0.02 |   | 1 |   |
| ;     |                  |      |   |   |   |
| 21230 | 211.246963500977 | 0.02 |   | 1 |   |
| ;     |                  |      |   |   |   |

|       |                  |      |   |   |
|-------|------------------|------|---|---|
| 21231 | 211.000457763672 | 0.00 | 1 |   |
| ;     |                  |      |   |   |
| 21232 | 208.275451660156 | 0.03 | 1 |   |
| ;     |                  |      |   |   |
| 21233 | 208.596054077148 | 0.04 | 1 |   |
| ;     |                  |      |   |   |
| 21234 | 198.62678527832  | 0.01 | 1 | ; |
| 21235 | 194.783065795898 | 0.03 | 1 |   |
| ;     |                  |      |   |   |
| 21236 | 194.949264526367 | 0.03 | 1 |   |
| ;     |                  |      |   |   |
| 21237 | 208.404113769531 | 0.00 | 1 |   |
| ;     |                  |      |   |   |
| 21238 | 208.362564086914 | 0.00 | 1 |   |
| ;     |                  |      |   |   |
| 21239 | 196.050186157227 | 0.00 | 1 |   |
| ;     |                  |      |   |   |
| 21240 | 196.144943237305 | 0.00 | 1 |   |
| ;     |                  |      |   |   |
| 21241 | 195.153091430664 | 0.00 | 1 |   |
| ;     |                  |      |   |   |
| 21242 | 195.038558959961 | 0.00 | 1 |   |
| ;     |                  |      |   |   |
| 21243 | 195.127990722656 | 0.01 | 1 |   |
| ;     |                  |      |   |   |
| 21244 | 195.034927368164 | 0.06 | 1 |   |
| ;     |                  |      |   |   |
| 21245 | 198.099365234375 | 0.06 | 1 |   |
| ;     |                  |      |   |   |
| 21246 | 198.663818359375 | 0.04 | 1 |   |
| ;     |                  |      |   |   |
| 21247 | 198.840209960938 | 0.08 | 1 |   |
| ;     |                  |      |   |   |
| 21248 | 198.66828918457  | 0.01 | 1 | ; |
| 21249 | 199.734909057617 | 0.07 | 1 |   |
| ;     |                  |      |   |   |
| 21250 | 200              | 0.04 | 1 | ; |
| 21251 | 199.768997192383 | 0.01 | 1 |   |
| ;     |                  |      |   |   |
| 21252 | 202.935638427734 | 0.03 | 1 |   |
| ;     |                  |      |   |   |
| 21253 | 203.168746948242 | 0.01 | 1 |   |
| ;     |                  |      |   |   |
| 21254 | 205.298431396484 | 0.03 | 1 |   |
| ;     |                  |      |   |   |
| 21255 | 205.367233276367 | 0.02 | 1 |   |
| ;     |                  |      |   |   |
| 21256 | 205.830291748047 | 0.02 | 1 |   |
| ;     |                  |      |   |   |
| 21257 | 205.73860168457  | 0.01 | 1 | ; |



|       |                  |      |   |   |
|-------|------------------|------|---|---|
| 21258 | 205.824798583984 | 0.01 | 1 |   |
| ;     |                  |      |   |   |
| 21259 | 205.761535644531 | 0.02 | 1 |   |
| ;     |                  |      |   |   |
| 21260 | 205.593643188477 | 0.03 | 1 |   |
| ;     |                  |      |   |   |
| 21261 | 205.766082763672 | 0.03 | 1 |   |
| ;     |                  |      |   |   |
| 21262 | 205              | 0.01 | 1 | ; |
| 21263 | 205              | 0.05 | 1 | ; |
| 21264 | 218.348892211914 | 0.06 | 1 |   |
| ;     |                  |      |   |   |
| 21265 | 217.650329589844 | 0.09 | 1 |   |
| ;     |                  |      |   |   |
| 21266 | 218.440383911133 | 0.05 | 1 |   |
| ;     |                  |      |   |   |
| 21267 | 218.076065063477 | 0.03 | 1 |   |
| ;     |                  |      |   |   |
| 21268 | 217.847305297852 | 0.13 | 1 |   |
| ;     |                  |      |   |   |
| 21269 | 218.88330078125  | 0.02 | 1 | ; |
| 21270 | 220.092437744141 | 0.01 | 1 |   |
| ;     |                  |      |   |   |
| 21271 | 219.779037475586 | 0.01 | 1 |   |
| ;     |                  |      |   |   |
| 21272 | 203.59782409668  | 0.02 | 1 | ; |
| 21273 | 203.544677734375 | 0.02 | 1 |   |
| ;     |                  |      |   |   |
| 21274 | 203.81330871582  | 0.01 | 1 | ; |
| 21275 | 203.875366210938 | 0.02 | 1 |   |
| ;     |                  |      |   |   |
| 21276 | 203.619903564453 | 0.16 | 1 |   |
| ;     |                  |      |   |   |
| 21277 | 201.926879882813 | 0.15 | 1 |   |
| ;     |                  |      |   |   |
| 21278 | 202.031234741211 | 0.01 | 1 |   |
| ;     |                  |      |   |   |
| 21279 | 204.291458129883 | 0.11 | 1 |   |
| ;     |                  |      |   |   |
| 21280 | 203.961715698242 | 0.00 | 1 |   |
| ;     |                  |      |   |   |
| 21281 | 198.175262451172 | 0.01 | 1 |   |
| ;     |                  |      |   |   |
| 21282 | 198.347366333008 | 0.02 | 1 |   |
| ;     |                  |      |   |   |
| 21283 | 199.037322998047 | 0.00 | 1 |   |
| ;     |                  |      |   |   |
| 21284 | 214.963485717773 | 0.00 | 1 |   |
| ;     |                  |      |   |   |
| 21285 | 214.986190795898 | 0.00 | 1 |   |

|       |                  |      |   |   |   |
|-------|------------------|------|---|---|---|
| ;     |                  |      |   |   |   |
| 21286 | 198.36393737793  | 0.01 | 1 |   | ; |
| 21287 | 198.310485839844 | 0.01 |   | 1 |   |
| ;     |                  |      |   |   |   |
| 21288 | 198.262283325195 | 0.00 |   | 1 |   |
| ;     |                  |      |   |   |   |
| 21289 | 198.351531982422 | 0.00 |   | 1 |   |
| ;     |                  |      |   |   |   |
| 21290 | 198.56787109375  | 0.02 | 1 |   | ; |
| 21291 | 198.379653930664 | 0.00 |   | 1 |   |
| ;     |                  |      |   |   |   |
| 21292 | 198.431549072266 | 0.00 |   | 1 |   |
| ;     |                  |      |   |   |   |
| 21293 | 206.822463989258 | 0.02 |   | 1 |   |
| ;     |                  |      |   |   |   |
| 21294 | 207.186508178711 | 0.01 |   | 1 |   |
| ;     |                  |      |   |   |   |
| 21295 | 207.142211914063 | 0.06 |   | 1 |   |
| ;     |                  |      |   |   |   |
| 21296 | 197.872253417969 | 0.00 |   | 1 |   |
| ;     |                  |      |   |   |   |
| 21297 | 198.013702392578 | 0.01 |   | 1 |   |
| ;     |                  |      |   |   |   |
| 21298 | 212.620483398438 | 0.01 |   | 1 |   |
| ;     |                  |      |   |   |   |
| 21299 | 212.821807861328 | 0.01 |   | 1 |   |
| ;     |                  |      |   |   |   |
| 21300 | 212.544143676758 | 0.01 |   | 1 |   |
| ;     |                  |      |   |   |   |
| 21301 | 205.184814453125 | 0.04 |   | 1 |   |
| ;     |                  |      |   |   |   |
| 21302 | 205.259872436523 | 0.12 |   | 1 |   |
| ;     |                  |      |   |   |   |
| 21303 | 199.833389282227 | 0.00 |   | 1 |   |
| ;     |                  |      |   |   |   |
| 21304 | 200              | 0.00 | 1 |   | ; |
| 21305 | 215.137145996094 | 0.12 |   | 1 |   |
| ;     |                  |      |   |   |   |
| 21306 | 215.319885253906 | 0.00 |   | 1 |   |
| ;     |                  |      |   |   |   |
| 21307 | 215.711380004883 | 0.02 |   | 1 |   |
| ;     |                  |      |   |   |   |
| 21308 | 197.398712158203 | 0.07 |   | 1 |   |
| ;     |                  |      |   |   |   |
| 21309 | 195.774642944336 | 0.05 |   | 1 |   |
| ;     |                  |      |   |   |   |
| 21310 | 199.741317749023 | 0.01 |   | 1 |   |
| ;     |                  |      |   |   |   |
| 21311 | 200.49006652832  | 0.01 | 1 |   | ; |
| 21312 | 212.198333740234 | 0.07 |   | 1 |   |

|       |                  |      |   |   |
|-------|------------------|------|---|---|
| ;     |                  |      |   |   |
| 21313 | 212.872604370117 | 0.09 | 1 |   |
| ;     |                  |      |   |   |
| 21314 | 228.568176269531 | 0.04 | 1 |   |
| ;     |                  |      |   |   |
| 21315 | 228.870666503906 | 0.01 | 1 |   |
| ;     |                  |      |   |   |
| 21316 | 219.978149414063 | 0.00 | 1 |   |
| ;     |                  |      |   |   |
| 21317 | 196.555511474609 | 0.02 | 1 |   |
| ;     |                  |      |   |   |
| 21318 | 195.712188720703 | 0.01 | 1 |   |
| ;     |                  |      |   |   |
| 21319 | 200.086944580078 | 0.03 | 1 |   |
| ;     |                  |      |   |   |
| 21320 | 199.871826171875 | 0.01 | 1 |   |
| ;     |                  |      |   |   |
| 21321 | 197.475296020508 | 0.01 | 1 |   |
| ;     |                  |      |   |   |
| 21322 | 197.370513916016 | 0.02 | 1 |   |
| ;     |                  |      |   |   |
| 21323 | 199.741729736328 | 0.00 | 1 |   |
| ;     |                  |      |   |   |
| 21324 | 199.657928466797 | 0.00 | 1 |   |
| ;     |                  |      |   |   |
| 21325 | 205.241592407227 | 0.03 | 1 |   |
| ;     |                  |      |   |   |
| 21326 | 205.294143676758 | 0.01 | 1 |   |
| ;     |                  |      |   |   |
| 21327 | 204.205169677734 | 0.02 | 1 |   |
| ;     |                  |      |   |   |
| 21328 | 204.476516723633 | 0.01 | 1 |   |
| ;     |                  |      |   |   |
| 21329 | 204.302108764648 | 0.01 | 1 |   |
| ;     |                  |      |   |   |
| 21330 | 203.819625854492 | 0.03 | 1 |   |
| ;     |                  |      |   |   |
| 21331 | 203.89990234375  | 0.04 | 1 |   |
| 21332 | 193.666076660156 | 0.00 | 1 | ; |
| ;     |                  |      |   |   |
| 21333 | 193.618240356445 | 0.01 | 1 |   |
| ;     |                  |      |   |   |
| 21334 | 193.891784667969 | 0.01 | 1 |   |
| ;     |                  |      |   |   |
| 21335 | 194.162841796875 | 0.02 | 1 |   |
| ;     |                  |      |   |   |
| 21336 | 194.328338623047 | 0.01 | 1 |   |
| ;     |                  |      |   |   |
| 21337 | 200.636779785156 | 0.01 | 1 |   |
| ;     |                  |      |   |   |

|       |                      |      |   |   |
|-------|----------------------|------|---|---|
| 21338 | 200.774520874023     | 0.00 | 1 |   |
| ;     |                      |      |   |   |
| 21339 | 199.058166503906     | 0.05 | 1 |   |
| ;     |                      |      |   |   |
| 21340 | 199.429000854492     | 0.03 | 1 |   |
| ;     |                      |      |   |   |
| 21341 | 196.905578613281     | 0.02 | 1 |   |
| ;     |                      |      |   |   |
| 21342 | 196.627334594727     | 0.02 | 1 |   |
| ;     |                      |      |   |   |
| 21343 | 194.778259277344     | 0.01 | 1 |   |
| ;     |                      |      |   |   |
| 21344 | 194.931594848633     | 0.00 | 1 |   |
| ;     |                      |      |   |   |
| 21345 | 195.028457641602     | 0.01 | 1 |   |
| ;     |                      |      |   |   |
| 21346 | 194.874816894531     | 0.02 | 1 |   |
| ;     |                      |      |   |   |
| 21347 | 213.050155639648     | 0.10 | 1 |   |
| ;     |                      |      |   |   |
| 21348 | 212.227325439453     | 0.09 | 1 |   |
| ;     |                      |      |   |   |
| 21349 | 212.374328613281     | 0.13 | 1 |   |
| ;     |                      |      |   |   |
| 21350 | 193.314376831055     | 0.01 | 1 |   |
| ;     |                      |      |   |   |
| 21351 | 195.228668212891     | 0.03 | 1 |   |
| ;     |                      |      |   |   |
| 21352 | 194.931701660156     | 0.01 | 1 |   |
| ;     |                      |      |   |   |
| 21353 | 198.751007080078     | 0.03 | 1 |   |
| ;     |                      |      |   |   |
| 21354 | 198.707107543945     | 0.05 | 1 |   |
| ;     |                      |      |   |   |
| 21355 | 198.572082519531     | 0.02 | 1 |   |
| ;     |                      |      |   |   |
| 21356 | 198.59504699707 0.03 |      | 1 |   |
| 21357 | 198.637008666992     | 0.03 | 1 | ; |
| ;     |                      |      |   |   |
| 21358 | 198.324569702148     | 0.00 | 1 |   |
| ;     |                      |      |   |   |
| 21359 | 198.470764160156     | 0.00 | 1 |   |
| ;     |                      |      |   |   |
| 21360 | 203.891525268555     | 0.01 | 1 |   |
| ;     |                      |      |   |   |
| 21361 | 203.856948852539     | 0.00 | 1 |   |
| ;     |                      |      |   |   |
| 21362 | 204.12663269043 0.01 |      | 1 |   |
| 21363 | 203.397918701172     | 0.03 | 1 | ; |
| ;     |                      |      |   |   |

|       |                  |      |   |   |
|-------|------------------|------|---|---|
| 21364 | 199.488815307617 | 0.02 | 1 |   |
| ;     |                  |      |   |   |
| 21365 | 198.975296020508 | 0.01 | 1 |   |
| ;     |                  |      |   |   |
| 21366 | 199.188323974609 | 0.03 | 1 |   |
| ;     |                  |      |   |   |
| 21367 | 197.801071166992 | 0.07 | 1 |   |
| ;     |                  |      |   |   |
| 21368 | 197.652908325195 | 0.01 | 1 |   |
| ;     |                  |      |   |   |
| 21369 | 195.403915405273 | 0.02 | 1 |   |
| ;     |                  |      |   |   |
| 21370 | 195.604675292969 | 0.02 | 1 |   |
| ;     |                  |      |   |   |
| 21371 | 196.123565673828 | 0.07 | 1 |   |
| ;     |                  |      |   |   |
| 21372 | 195.187316894531 | 0.06 | 1 |   |
| ;     |                  |      |   |   |
| 21373 | 194.953536987305 | 0.03 | 1 |   |
| ;     |                  |      |   |   |
| 21374 | 194.728179931641 | 0.03 | 1 |   |
| ;     |                  |      |   |   |
| 21375 | 194.661346435547 | 0.01 | 1 |   |
| ;     |                  |      |   |   |
| 21376 | 194.343948364258 | 0.03 | 1 |   |
| ;     |                  |      |   |   |
| 21377 | 194.47184753418  | 0.02 | 1 |   |
| 21378 | 194.573165893555 | 0.01 | 1 | ; |
| ;     |                  |      |   |   |
| 21379 | 194.339111328125 | 0.05 | 1 |   |
| ;     |                  |      |   |   |
| 21380 | 210.885162353516 | 0.03 | 1 |   |
| ;     |                  |      |   |   |
| 21381 | 210.906280517578 | 0.00 | 1 |   |
| ;     |                  |      |   |   |
| 21382 | 200.073364257812 | 0.07 | 1 |   |
| ;     |                  |      |   |   |
| 21383 | 199.914901733398 | 0.01 | 1 |   |
| ;     |                  |      |   |   |
| 21384 | 200.327331542969 | 0.00 | 1 |   |
| ;     |                  |      |   |   |
| 21385 | 200.100616455078 | 0.00 | 1 |   |
| ;     |                  |      |   |   |
| 21386 | 200              | 0.01 | 1 | ; |
| 21387 | 200              | 0.01 | 1 | ; |
| 21388 | 219.460021972656 | 0.01 | 1 |   |
| ;     |                  |      |   |   |
| 21389 | 219.262268066406 | 0.01 | 1 |   |
| ;     |                  |      |   |   |
| 21390 | 199.955169677734 | 0.04 | 1 |   |

|       |                  |      |   |   |
|-------|------------------|------|---|---|
| ;     |                  |      |   |   |
| 21391 | 199.225509643555 | 0.08 | 1 |   |
| ;     |                  |      |   |   |
| 21392 | 196.182022094727 | 0.03 | 1 |   |
| ;     |                  |      |   |   |
| 21393 | 197.622924804688 | 0.02 | 1 |   |
| ;     |                  |      |   |   |
| 21394 | 198.053573608398 | 0.02 | 1 |   |
| ;     |                  |      |   |   |
| 21395 | 197.111373901367 | 0.03 | 1 |   |
| ;     |                  |      |   |   |
| 21396 | 196.627593994141 | 0.02 | 1 |   |
| ;     |                  |      |   |   |
| 21397 | 198.034332275391 | 0.01 | 1 |   |
| ;     |                  |      |   |   |
| 21398 | 197.454238891602 | 0.01 | 1 |   |
| ;     |                  |      |   |   |
| 21399 | 213.165161132813 | 0.00 | 1 |   |
| ;     |                  |      |   |   |
| 21400 | 213.182174682617 | 0.05 | 1 |   |
| ;     |                  |      |   |   |
| 21401 | 198.891693115234 | 0.00 | 1 |   |
| ;     |                  |      |   |   |
| 21402 | 198.954544067383 | 0.00 | 1 |   |
| ;     |                  |      |   |   |
| 21403 | 205.51838684082  | 0.01 | 1 | ; |
| 21404 | 205.477920532227 | 0.02 | 1 |   |
| ;     |                  |      |   |   |
| 21405 | 205.348388671875 | 0.04 | 1 |   |
| ;     |                  |      |   |   |
| 21406 | 205.335983276367 | 0.00 | 1 |   |
| ;     |                  |      |   |   |
| 21407 | 199.824020385742 | 0.07 | 1 |   |
| ;     |                  |      |   |   |
| 21408 | 198.672988891602 | 0.07 | 1 |   |
| ;     |                  |      |   |   |
| 21409 | 199.654479980469 | 0.07 | 1 |   |
| ;     |                  |      |   |   |
| 21410 | 199.886001586914 | 0.00 | 1 |   |
| ;     |                  |      |   |   |
| 21411 | 200.474395751953 | 0.01 | 1 |   |
| ;     |                  |      |   |   |
| 21412 | 200.395751953125 | 0.00 | 1 |   |
| ;     |                  |      |   |   |
| 21413 | 199.278579711914 | 0.05 | 1 |   |
| ;     |                  |      |   |   |
| 21414 | 205              | 0.03 | 1 | ; |
| 21415 | 204.895126342773 | 0.04 | 1 |   |
| ;     |                  |      |   |   |
| 21416 | 202.025100708008 | 0.03 | 1 |   |

|       |                  |      |   |
|-------|------------------|------|---|
| ;     |                  |      |   |
| 21417 | 201.704299926758 | 0.03 | 1 |
| ;     |                  |      |   |
| 21418 | 195.356628417969 | 0.03 | 1 |
| ;     |                  |      |   |
| 21419 | 195.273941040039 | 0.03 | 1 |
| ;     |                  |      |   |
| 21420 | 195.687698364258 | 0.03 | 1 |
| ;     |                  |      |   |
| 21421 | 195.532699584961 | 0.03 | 1 |
| ;     |                  |      |   |
| 21422 | 196.275299072266 | 0.03 | 1 |
| ;     |                  |      |   |
| 21423 | 195.945831298828 | 0.03 | 1 |
| ;     |                  |      |   |
| 21424 | 195.704711914063 | 0.03 | 1 |
| ;     |                  |      |   |
| 21425 | 195.495254516602 | 0.03 | 1 |
| ;     |                  |      |   |
| 21426 | 196.005645751953 | 0.00 | 1 |
| ;     |                  |      |   |
| 21427 | 198.306076049805 | 0.02 | 1 |
| ;     |                  |      |   |
| 21428 | 198.260726928711 | 0.00 | 1 |
| ;     |                  |      |   |
| 21429 | 198.860366821289 | 0.01 | 1 |
| ;     |                  |      |   |
| 21430 | 217.188171386719 | 0.03 | 1 |
| ;     |                  |      |   |
| 21431 | 205.075332641602 | 0.00 | 1 |
| ;     |                  |      |   |
| 21432 | 205.115570068359 | 0.00 | 1 |
| ;     |                  |      |   |
| 21433 | 206.063949584961 | 0.04 | 1 |
| ;     |                  |      |   |
| 21434 | 218.937088012695 | 0.00 | 1 |
| ;     |                  |      |   |
| 21435 | 203.280364990234 | 0.00 | 1 |
| ;     |                  |      |   |
| 21436 | 203.268951416016 | 0.00 | 1 |
| ;     |                  |      |   |
| 21437 | 202.020858764648 | 0.01 | 1 |
| ;     |                  |      |   |
| 21438 | 201.800796508789 | 0.01 | 1 |
| ;     |                  |      |   |
| 21439 | 197.884170532227 | 0.05 | 1 |
| ;     |                  |      |   |
| 21440 | 198.217544555664 | 0.07 | 1 |
| ;     |                  |      |   |
| 21441 | 198.367126464844 | 0.00 | 1 |

|       |                  |      |   |   |   |
|-------|------------------|------|---|---|---|
| ;     |                  |      |   |   |   |
| 21442 | 198.233764648438 | 0.01 |   | 1 |   |
| ;     |                  |      |   |   |   |
| 21443 | 198.021514892578 | 0.02 |   | 1 |   |
| ;     |                  |      |   |   |   |
| 21444 | 198.407516479492 | 0.02 |   | 1 |   |
| ;     |                  |      |   |   |   |
| 21445 | 195.137176513672 | 0.01 |   | 1 |   |
| ;     |                  |      |   |   |   |
| 21446 | 195.267868041992 | 0.01 |   | 1 |   |
| ;     |                  |      |   |   |   |
| 21447 | 205              | 0.01 | 1 |   | ; |
| 21448 | 197.596710205078 | 0.02 |   | 1 |   |
| ;     |                  |      |   |   |   |
| 21449 | 197.884399414063 | 0.02 |   | 1 |   |
| ;     |                  |      |   |   |   |
| 21450 | 196.540908813477 | 0.01 |   | 1 |   |
| ;     |                  |      |   |   |   |
| 21451 | 195.911407470703 | 0.09 |   | 1 |   |
| ;     |                  |      |   |   |   |
| 21452 | 197.458618164063 | 0.01 |   | 1 |   |
| ;     |                  |      |   |   |   |
| 21453 | 198.619613647461 | 0.01 |   | 1 |   |
| ;     |                  |      |   |   |   |
| 21454 | 199.58024597168  | 0.01 | 1 |   | ; |
| 21455 | 199.82421875     | 0.00 | 1 |   | ; |
| 21456 | 197.27702331543  | 0.00 | 1 |   | ; |
| 21457 | 194.87126159668  | 0.05 | 1 |   | ; |
| 21458 | 194.278228759766 | 0.03 |   | 1 |   |
| ;     |                  |      |   |   |   |
| 21459 | 193.752716064453 | 0.03 |   | 1 |   |
| ;     |                  |      |   |   |   |
| 21460 | 195.642532348633 | 0.00 |   | 1 |   |
| ;     |                  |      |   |   |   |
| 21461 | 195.501358032227 | 0.00 |   | 1 |   |
| ;     |                  |      |   |   |   |
| 21462 | 215.548126220703 | 0.15 |   | 1 |   |
| ;     |                  |      |   |   |   |
| 21463 | 215.726409912109 | 0.00 |   | 1 |   |
| ;     |                  |      |   |   |   |
| 21464 | 200.456085205078 | 0.01 |   | 1 |   |
| ;     |                  |      |   |   |   |
| 21465 | 219.374267578125 | 0.01 |   | 1 |   |
| ;     |                  |      |   |   |   |
| 21466 | 217.193359375    | 0.03 | 1 |   | ; |
| 21467 | 217.558731079102 | 0.04 |   | 1 |   |
| ;     |                  |      |   |   |   |
| 21468 | 203.854080200195 | 0.01 |   | 1 |   |
| ;     |                  |      |   |   |   |
| 21469 | 193.631530761719 | 0.00 |   | 1 |   |



|       |                  |      |   |   |   |
|-------|------------------|------|---|---|---|
| ;     |                  |      |   |   |   |
| 21470 | 193.363845825195 | 0.01 |   | 1 |   |
| ;     |                  |      |   |   |   |
| 21471 | 200              | 0.01 | 1 |   | ; |
| 21472 | 200              | 0.01 | 1 |   | ; |
| 21473 | 195.732376098633 | 0.01 |   | 1 |   |
| ;     |                  |      |   |   |   |
| 21474 | 196.007583618164 | 0.01 |   | 1 |   |
| ;     |                  |      |   |   |   |
| 21475 | 196.02278137207  | 0.08 | 1 |   | ; |
| 21476 | 194.007171630859 | 0.00 |   | 1 |   |
| ;     |                  |      |   |   |   |
| 21477 | 199.040817260742 | 0.01 |   | 1 |   |
| ;     |                  |      |   |   |   |
| 21478 | 198.921783447266 | 0.01 |   | 1 |   |
| ;     |                  |      |   |   |   |
| 21479 | 201.709625244141 | 0.00 |   | 1 |   |
| ;     |                  |      |   |   |   |
| 21480 | 201.346893310547 | 0.04 |   | 1 |   |
| ;     |                  |      |   |   |   |
| 21481 | 199.200988769531 | 0.01 |   | 1 |   |
| ;     |                  |      |   |   |   |
| 21482 | 194.47314453125  | 0.03 | 1 |   | ; |
| 21483 | 194.578033447266 | 0.02 |   | 1 |   |
| ;     |                  |      |   |   |   |
| 21484 | 194.726989746094 | 0.02 |   | 1 |   |
| ;     |                  |      |   |   |   |
| 21485 | 197.84587097168  | 0.05 | 1 |   | ; |
| 21486 | 197.677612304688 | 0.03 |   | 1 |   |
| ;     |                  |      |   |   |   |
| 21487 | 198.260070800781 | 0.02 |   | 1 |   |
| ;     |                  |      |   |   |   |
| 21488 | 197.95768737793  | 0.01 | 1 |   | ; |
| 21489 | 207.067672729492 | 0.06 |   | 1 |   |
| ;     |                  |      |   |   |   |
| 21490 | 206.926803588867 | 0.03 |   | 1 |   |
| ;     |                  |      |   |   |   |
| 21491 | 205              | 0.02 | 1 |   | ; |
| 21492 | 205              | 0.02 | 1 |   | ; |
| 21493 | 206.580902099609 | 0.02 |   | 1 |   |
| ;     |                  |      |   |   |   |
| 21494 | 206.047027587891 | 0.03 |   | 1 |   |
| ;     |                  |      |   |   |   |
| 21495 | 194.33349609375  | 0.00 | 1 |   | ; |
| 21496 | 194.111785888672 | 0.00 |   | 1 |   |
| ;     |                  |      |   |   |   |
| 21497 | 198.681503295898 | 0.01 |   | 1 |   |
| ;     |                  |      |   |   |   |
| 21498 | 195.428237915039 | 0.01 |   | 1 |   |
| ;     |                  |      |   |   |   |

|       |                  |      |   |  |
|-------|------------------|------|---|--|
| 21499 | 195.908004760742 | 0.11 | 1 |  |
| ;     |                  |      |   |  |
| 21500 | 196.268814086914 | 0.01 | 1 |  |
| ;     |                  |      |   |  |
| 21501 | 196.001358032227 | 0.02 | 1 |  |
| ;     |                  |      |   |  |
| 21502 | 195.688247680664 | 0.01 | 1 |  |
| ;     |                  |      |   |  |
| 21503 | 196.74284362793  | 0.00 | 1 |  |
| 21504 | 190.380554199219 | 0.01 | 1 |  |
| ;     |                  |      |   |  |
| 21505 | 220.017303466797 | 0.02 | 1 |  |
| ;     |                  |      |   |  |
| 21506 | 219.958358764648 | 0.02 | 1 |  |
| ;     |                  |      |   |  |
| 21507 | 220.598022460938 | 0.03 | 1 |  |
| ;     |                  |      |   |  |
| 21508 | 220.629486083984 | 0.01 | 1 |  |
| ;     |                  |      |   |  |
| 21509 | 220.718276977539 | 0.02 | 1 |  |
| ;     |                  |      |   |  |
| 21510 | 220.765975952148 | 0.00 | 1 |  |
| ;     |                  |      |   |  |
| 21511 | 220.403121948242 | 0.03 | 1 |  |
| ;     |                  |      |   |  |
| 21512 | 196.836654663086 | 0.01 | 1 |  |
| ;     |                  |      |   |  |
| 21513 | 196.888229370117 | 0.00 | 1 |  |
| ;     |                  |      |   |  |
| 21514 | 198.608322143555 | 0.05 | 1 |  |
| ;     |                  |      |   |  |
| 21515 | 198.13200378418  | 0.04 | 1 |  |
| 21516 | 196.329010009766 | 0.05 | 1 |  |
| ;     |                  |      |   |  |
| 21517 | 195.765014648438 | 0.05 | 1 |  |
| ;     |                  |      |   |  |
| 21518 | 196.176544189453 | 0.01 | 1 |  |
| ;     |                  |      |   |  |
| 21519 | 196.059448242187 | 0.01 | 1 |  |
| ;     |                  |      |   |  |
| 21520 | 195.741226196289 | 0.05 | 1 |  |
| ;     |                  |      |   |  |
| 21521 | 196.044036865234 | 0.01 | 1 |  |
| ;     |                  |      |   |  |
| 21522 | 196.192718505859 | 0.00 | 1 |  |
| ;     |                  |      |   |  |
| 21523 | 196.339080810547 | 0.00 | 1 |  |
| ;     |                  |      |   |  |
| 21524 | 197.081344604492 | 0.00 | 1 |  |
| ;     |                  |      |   |  |

|       |                  |      |   |   |
|-------|------------------|------|---|---|
| 21525 | 196.521575927734 | 0.01 | 1 |   |
| ;     |                  |      |   |   |
| 21526 | 196.749298095703 | 0.02 | 1 |   |
| ;     |                  |      |   |   |
| 21527 | 196.984085083008 | 0.02 | 1 |   |
| ;     |                  |      |   |   |
| 21528 | 198.979370117188 | 0.00 | 1 |   |
| ;     |                  |      |   |   |
| 21529 | 198.498504638672 | 0.07 | 1 |   |
| ;     |                  |      |   |   |
| 21530 | 199.443084716797 | 0.01 | 1 |   |
| ;     |                  |      |   |   |
| 21531 | 206.251342773438 | 0.22 | 1 |   |
| ;     |                  |      |   |   |
| 21532 | 206.998825073242 | 0.06 | 1 |   |
| ;     |                  |      |   |   |
| 21533 | 205.8232421875   | 0.01 | 1 | ; |
| 21534 | 204.661727905273 | 0.21 | 1 |   |
| ;     |                  |      |   |   |
| 21535 | 205.39421081543  | 0.04 | 1 | ; |
| 21536 | 196.172836303711 | 0.03 | 1 |   |
| ;     |                  |      |   |   |
| 21537 | 196.681610107422 | 0.04 | 1 |   |
| ;     |                  |      |   |   |
| 21538 | 205              | 0.06 | 1 | ; |
| 21539 | 205              | 0.02 | 1 | ; |
| 21540 | 205.934295654297 | 0.00 | 1 |   |
| ;     |                  |      |   |   |
| 21541 | 206.159881591797 | 0.01 | 1 |   |
| ;     |                  |      |   |   |
| 21542 | 199.80061340332  | 0.09 | 1 | ; |
| 21543 | 200.774215698242 | 0.09 | 1 |   |
| ;     |                  |      |   |   |
| 21544 | 195.716094970703 | 0.01 | 1 |   |
| ;     |                  |      |   |   |
| 21545 | 220.960388183594 | 0.04 | 1 |   |
| ;     |                  |      |   |   |
| 21546 | 221.035079956055 | 0.01 | 1 |   |
| ;     |                  |      |   |   |
| 21547 | 196.896850585938 | 0.02 | 1 |   |
| ;     |                  |      |   |   |
| 21548 | 200.281524658203 | 0.04 | 1 |   |
| ;     |                  |      |   |   |
| 21549 | 200.127914428711 | 0.00 | 1 |   |
| ;     |                  |      |   |   |
| 21550 | 199.899841308594 | 0.01 | 1 |   |
| ;     |                  |      |   |   |
| 21551 | 198.06201171875  | 0.02 | 1 | ; |
| 21552 | 198.118835449219 | 0.03 | 1 |   |
| ;     |                  |      |   |   |

|       |                  |      |   |   |  |  |   |
|-------|------------------|------|---|---|--|--|---|
| 21553 | 198.1787109375   | 0.05 | 1 |   |  |  |   |
| 21554 | 198.052230834961 | 0.06 |   | 1 |  |  |   |
| ;     |                  |      |   |   |  |  |   |
| 21555 | 198.716384887695 | 0.02 |   | 1 |  |  |   |
| ;     |                  |      |   |   |  |  |   |
| 21556 | 196.182159423828 | 0.00 |   | 1 |  |  |   |
| ;     |                  |      |   |   |  |  |   |
| 21557 | 207.305389404297 | 0.05 |   | 1 |  |  |   |
| ;     |                  |      |   |   |  |  |   |
| 21558 | 207.688903808594 | 0.05 |   | 1 |  |  |   |
| ;     |                  |      |   |   |  |  |   |
| 21559 | 206.260757446289 | 0.15 |   | 1 |  |  |   |
| ;     |                  |      |   |   |  |  |   |
| 21560 | 208.682266235352 | 0.04 |   | 1 |  |  |   |
| ;     |                  |      |   |   |  |  |   |
| 21561 | 208.109771728516 | 0.03 |   | 1 |  |  |   |
| ;     |                  |      |   |   |  |  |   |
| 21562 | 196.123168945313 | 0.03 |   | 1 |  |  |   |
| ;     |                  |      |   |   |  |  |   |
| 21563 | 206.182586669922 | 0.05 |   | 1 |  |  |   |
| ;     |                  |      |   |   |  |  |   |
| 21564 | 206.404754638672 | 0.02 |   | 1 |  |  |   |
| ;     |                  |      |   |   |  |  |   |
| 21565 | 206.952972412109 | 0.02 |   | 1 |  |  |   |
| ;     |                  |      |   |   |  |  |   |
| 21566 | 197.810607910156 | 0.01 |   | 1 |  |  |   |
| ;     |                  |      |   |   |  |  |   |
| 21567 | 199.627960205078 | 0.13 |   | 1 |  |  |   |
| ;     |                  |      |   |   |  |  |   |
| 21568 | 196.275985717773 | 0.12 |   | 1 |  |  |   |
| ;     |                  |      |   |   |  |  |   |
| 21569 | 198.483917236328 | 0.01 |   | 1 |  |  |   |
| ;     |                  |      |   |   |  |  |   |
| 21570 | 198.233184814453 | 0.04 |   | 1 |  |  |   |
| ;     |                  |      |   |   |  |  |   |
| 21571 | 199.222564697266 | 0.01 |   | 1 |  |  |   |
| ;     |                  |      |   |   |  |  |   |
| 21572 | 199.533782958984 | 0.05 |   | 1 |  |  |   |
| ;     |                  |      |   |   |  |  |   |
| 21573 | 205              | 0.01 | 1 |   |  |  | ; |
| 21574 | 205              | 0.01 | 1 |   |  |  | ; |
| 21575 | 200              | 0.01 | 1 |   |  |  | ; |
| 21576 | 199.900955200195 | 0.01 |   | 1 |  |  |   |
| ;     |                  |      |   |   |  |  |   |
| 21577 | 211.922012329102 | 0.01 |   | 1 |  |  |   |
| ;     |                  |      |   |   |  |  |   |
| 21578 | 212.725692749023 | 0.01 |   | 1 |  |  |   |
| ;     |                  |      |   |   |  |  |   |
| 21579 | 235.696166992187 | 0.01 |   | 1 |  |  |   |
| ;     |                  |      |   |   |  |  |   |

|       |                      |      |   |   |
|-------|----------------------|------|---|---|
| 21580 | 235.560470581055     | 0.02 | 1 |   |
| ;     |                      |      |   |   |
| 21581 | 213.2822265625 0.00  |      | 1 | ; |
| 21582 | 213.277648925781     | 0.04 | 1 |   |
| ;     |                      |      |   |   |
| 21583 | 213.286834716797     | 0.03 | 1 |   |
| ;     |                      |      |   |   |
| 21584 | 209.836227416992     | 0.00 | 1 |   |
| ;     |                      |      |   |   |
| 21585 | 205.650726318359     | 0.00 | 1 |   |
| ;     |                      |      |   |   |
| 21586 | 205.291168212891     | 0.00 | 1 |   |
| ;     |                      |      |   |   |
| 21587 | 205.328155517578     | 0.01 | 1 |   |
| ;     |                      |      |   |   |
| 21588 | 205.663726806641     | 0.03 | 1 |   |
| ;     |                      |      |   |   |
| 21589 | 210.680099487305     | 0.01 | 1 |   |
| ;     |                      |      |   |   |
| 21590 | 211.002426147461     | 0.02 | 1 |   |
| ;     |                      |      |   |   |
| 21591 | 219.72721862793 0.03 |      | 1 | ; |
| 21592 | 219.927978515625     | 0.02 | 1 |   |
| ;     |                      |      |   |   |
| 21593 | 222.980407714844     | 0.02 | 1 |   |
| ;     |                      |      |   |   |
| 21594 | 222.937316894531     | 0.00 | 1 |   |
| ;     |                      |      |   |   |
| 21595 | 221.977737426758     | 0.04 | 1 |   |
| ;     |                      |      |   |   |
| 21596 | 191.983825683594     | 0.03 | 1 |   |
| ;     |                      |      |   |   |
| 21597 | 192.374099731445     | 0.03 | 1 |   |
| ;     |                      |      |   |   |
| 21598 | 192.094741821289     | 0.00 | 1 |   |
| ;     |                      |      |   |   |
| 21599 | 191.980056762695     | 0.00 | 1 |   |
| ;     |                      |      |   |   |
| 21600 | 193.705215454102     | 0.01 | 1 |   |
| ;     |                      |      |   |   |
| 21601 | 193.635025024414     | 0.00 | 1 |   |
| ;     |                      |      |   |   |
| 21602 | 193.611968994141     | 0.03 | 1 |   |
| ;     |                      |      |   |   |
| 21603 | 209.75 0.00          |      | 1 | ; |
| 21604 | 209.75 0.00          |      | 1 | ; |
| 21605 | 209.75 0.00          |      | 1 | ; |
| 21606 | 209.75 0.00          |      | 1 | ; |
| 21607 | 209.75 0.00          |      | 1 | ; |
| 21608 | 202.735061645508     | 0.03 | 1 |   |

|       |                  |      |   |   |   |
|-------|------------------|------|---|---|---|
| ;     |                  |      |   |   |   |
| 21609 | 202.618118286133 | 0.04 |   | 1 |   |
| ;     |                  |      |   |   |   |
| 21610 | 217.253616333008 | 0.02 |   | 1 |   |
| ;     |                  |      |   |   |   |
| 21611 | 217.457565307617 | 0.02 |   | 1 |   |
| ;     |                  |      |   |   |   |
| 21612 | 217.544860839844 | 0.01 |   | 1 |   |
| ;     |                  |      |   |   |   |
| 21613 | 221.648086547852 | 0.01 |   | 1 |   |
| ;     |                  |      |   |   |   |
| 21614 | 221.772430419922 | 0.01 |   | 1 |   |
| ;     |                  |      |   |   |   |
| 21615 | 221.765853881836 | 0.00 |   | 1 |   |
| ;     |                  |      |   |   |   |
| 21616 | 221.614303588867 | 0.00 |   | 1 |   |
| ;     |                  |      |   |   |   |
| 21617 | 234.708740234375 | 0.06 |   | 1 |   |
| ;     |                  |      |   |   |   |
| 21618 | 234.609375       | 0.00 | 1 |   | ; |
| 21619 | 229.588592529297 | 0.02 |   | 1 |   |
| ;     |                  |      |   |   |   |
| 21620 | 216.62467956543  | 0.05 | 1 |   | ; |
| 21621 | 216.968215942383 | 0.01 |   | 1 |   |
| ;     |                  |      |   |   |   |
| 21622 | 216.504058837891 | 0.05 |   | 1 |   |
| ;     |                  |      |   |   |   |
| 21623 | 231.206893920898 | 0.00 |   | 1 |   |
| ;     |                  |      |   |   |   |
| 21624 | 231.371826171875 | 0.00 |   | 1 |   |
| ;     |                  |      |   |   |   |
| 21625 | 195.724014282227 | 0.01 |   | 1 |   |
| ;     |                  |      |   |   |   |
| 21626 | 195.719223022461 | 0.02 |   | 1 |   |
| ;     |                  |      |   |   |   |
| 21627 | 195.72428894043  | 0.06 | 1 |   | ; |
| 21628 | 195.546813964844 | 0.03 |   | 1 |   |
| ;     |                  |      |   |   |   |
| 21629 | 195.362823486328 | 0.00 |   | 1 |   |
| ;     |                  |      |   |   |   |
| 21630 | 195.379013061523 | 0.02 |   | 1 |   |
| ;     |                  |      |   |   |   |
| 21631 | 200.593078613281 | 0.06 |   | 1 |   |
| ;     |                  |      |   |   |   |
| 21632 | 200.583724975586 | 0.00 |   | 1 |   |
| ;     |                  |      |   |   |   |
| 21633 | 205.805236816406 | 0.02 |   | 1 |   |
| ;     |                  |      |   |   |   |
| 21634 | 205.79460144043  | 0.02 | 1 |   | ; |
| 21635 | 204.089462280273 | 0.00 |   | 1 |   |

|       |                  |      |   |   |   |
|-------|------------------|------|---|---|---|
| ;     |                  |      |   |   |   |
| 21636 | 218.548416137695 | 0.01 |   | 1 |   |
| ;     |                  |      |   |   |   |
| 21637 | 218.55094909668  | 0.02 | 1 |   | ; |
| 21638 | 218.202438354492 | 0.00 |   | 1 |   |
| ;     |                  |      |   |   |   |
| 21639 | 218.205368041992 | 0.03 |   | 1 |   |
| ;     |                  |      |   |   |   |
| 21640 | 218.199813842773 | 0.03 |   | 1 |   |
| ;     |                  |      |   |   |   |
| 21641 | 218.660781860352 | 0.04 |   | 1 |   |
| ;     |                  |      |   |   |   |
| 21642 | 218.673522949219 | 0.00 |   | 1 |   |
| ;     |                  |      |   |   |   |
| 21643 | 218.633941650391 | 0.02 |   | 1 |   |
| ;     |                  |      |   |   |   |
| 21644 | 218.64729309082  | 0.00 | 1 |   | ; |
| 21645 | 200.260177612305 | 0.02 |   | 1 |   |
| ;     |                  |      |   |   |   |
| 21646 | 204.873291015625 | 0.01 |   | 1 |   |
| ;     |                  |      |   |   |   |
| 21647 | 204.875076293945 | 0.09 |   | 1 |   |
| ;     |                  |      |   |   |   |
| 21648 | 203.663848876953 | 0.00 |   | 1 |   |
| ;     |                  |      |   |   |   |
| 21649 | 203.669815063477 | 0.00 |   | 1 |   |
| ;     |                  |      |   |   |   |
| 21650 | 201.252090454102 | 0.00 |   | 1 |   |
| ;     |                  |      |   |   |   |
| 21651 | 201.263549804688 | 0.06 |   | 1 |   |
| ;     |                  |      |   |   |   |
| 21652 | 194.38215637207  | 0.05 | 1 |   | ; |
| 21653 | 194.391647338867 | 0.01 |   | 1 |   |
| ;     |                  |      |   |   |   |
| 21654 | 221.773590087891 | 0.01 |   | 1 |   |
| ;     |                  |      |   |   |   |
| 21655 | 221.756195068359 | 0.03 |   | 1 |   |
| ;     |                  |      |   |   |   |
| 21656 | 207.742218017578 | 0.00 |   | 1 |   |
| ;     |                  |      |   |   |   |
| 21657 | 207.756973266602 | 0.01 |   | 1 |   |
| ;     |                  |      |   |   |   |
| 21658 | 206.784896850586 | 0.02 |   | 1 |   |
| ;     |                  |      |   |   |   |
| 21659 | 208.069702148438 | 0.20 |   | 1 |   |
| ;     |                  |      |   |   |   |
| 21660 | 207.492782592773 | 0.00 |   | 1 |   |
| ;     |                  |      |   |   |   |
| 21661 | 207.660522460938 | 0.00 |   | 1 |   |
| ;     |                  |      |   |   |   |

|       |                  |      |   |   |
|-------|------------------|------|---|---|
| 21662 | 206.145492553711 | 0.00 | 1 |   |
| ;     |                  |      |   |   |
| 21663 | 206.997711181641 | 0.00 | 1 |   |
| ;     |                  |      |   |   |
| 21664 | 205              | 0.04 | 1 | ; |
| 21665 | 205              | 0.06 | 1 | ; |
| 21666 | 207.310165405273 | 0.00 | 1 |   |
| ;     |                  |      |   |   |
| 21667 | 207.304336547852 | 0.00 | 1 |   |
| ;     |                  |      |   |   |
| 21668 | 207.161102294922 | 0.02 | 1 |   |
| ;     |                  |      |   |   |
| 21669 | 207.168640136719 | 0.01 | 1 |   |
| ;     |                  |      |   |   |
| 21670 | 207.203033447266 | 0.00 | 1 |   |
| ;     |                  |      |   |   |
| 21671 | 198.577041625977 | 0.03 | 1 |   |
| ;     |                  |      |   |   |
| 21672 | 198.657669067383 | 0.01 | 1 |   |
| ;     |                  |      |   |   |
| 21673 | 199.010940551758 | 0.03 | 1 |   |
| ;     |                  |      |   |   |
| 21674 | 199.453842163086 | 0.04 | 1 |   |
| ;     |                  |      |   |   |
| 21675 | 199.967300415039 | 0.01 | 1 |   |
| ;     |                  |      |   |   |
| 21676 | 200.054504394531 | 0.06 | 1 |   |
| ;     |                  |      |   |   |
| 21677 | 200.346664428711 | 0.04 | 1 |   |
| ;     |                  |      |   |   |
| 21678 | 199.002105712891 | 0.02 | 1 |   |
| ;     |                  |      |   |   |
| 21679 | 196.527435302734 | 0.02 | 1 |   |
| ;     |                  |      |   |   |
| 21680 | 196.717056274414 | 0.01 | 1 |   |
| ;     |                  |      |   |   |
| 21681 | 208.654571533203 | 0.03 | 1 |   |
| ;     |                  |      |   |   |
| 21682 | 209.478042602539 | 0.05 | 1 |   |
| ;     |                  |      |   |   |
| 21683 | 193.193664550781 | 0.01 | 1 |   |
| ;     |                  |      |   |   |
| 21684 | 205              | 0.03 | 1 | ; |
| 21685 | 194.765396118164 | 0.03 | 1 |   |
| ;     |                  |      |   |   |
| 21686 | 194.346710205078 | 0.03 | 1 |   |
| ;     |                  |      |   |   |
| 21687 | 205.315292358398 | 0.01 | 1 |   |
| ;     |                  |      |   |   |
| 21688 | 205.126266479492 | 0.02 | 1 |   |



|       |                  |      |   |   |  |   |
|-------|------------------|------|---|---|--|---|
| ;     |                  |      |   |   |  |   |
| 21689 | 205.830261230469 | 0.03 |   | 1 |  |   |
| ;     |                  |      |   |   |  |   |
| 21690 | 205.919876098633 | 0.02 |   | 1 |  |   |
| ;     |                  |      |   |   |  |   |
| 21691 | 200              | 0.01 | 1 |   |  | ; |
| 21692 | 200              | 0.01 | 1 |   |  | ; |
| 21693 | 199.449142456055 | 0.01 |   | 1 |  |   |
| ;     |                  |      |   |   |  |   |
| 21694 | 199.416610717773 | 0.01 |   | 1 |  |   |
| ;     |                  |      |   |   |  |   |
| 21695 | 199.504272460938 | 0.01 |   | 1 |  |   |
| ;     |                  |      |   |   |  |   |
| 21696 | 199.527191162109 | 0.01 |   | 1 |  |   |
| ;     |                  |      |   |   |  |   |
| 21697 | 198.937515258789 | 0.02 |   | 1 |  |   |
| ;     |                  |      |   |   |  |   |
| 21698 | 196.899719238281 | 0.01 |   | 1 |  |   |
| ;     |                  |      |   |   |  |   |
| 21699 | 196.817428588867 | 0.00 |   | 1 |  |   |
| ;     |                  |      |   |   |  |   |
| 21700 | 197.455352783203 | 0.00 |   | 1 |  |   |
| ;     |                  |      |   |   |  |   |
| 21701 | 199.03239440918  | 0.06 | 1 |   |  | ; |
| 21702 | 199.140914916992 | 0.03 |   | 1 |  |   |
| ;     |                  |      |   |   |  |   |
| 21703 | 197.61653137207  | 0.02 | 1 |   |  | ; |
| 21704 | 197.708969116211 | 0.00 |   | 1 |  |   |
| ;     |                  |      |   |   |  |   |
| 21705 | 208.649627685547 | 0.06 |   | 1 |  |   |
| ;     |                  |      |   |   |  |   |
| 21706 | 208.912887573242 | 0.01 |   | 1 |  |   |
| ;     |                  |      |   |   |  |   |
| 21707 | 208.101623535156 | 0.07 |   | 1 |  |   |
| ;     |                  |      |   |   |  |   |
| 21708 | 209.205368041992 | 0.09 |   | 1 |  |   |
| ;     |                  |      |   |   |  |   |
| 21709 | 205              | 0.01 | 1 |   |  | ; |
| 21710 | 205              | 0.01 | 1 |   |  | ; |
| 21711 | 205              | 0.01 | 1 |   |  | ; |
| 21712 | 205              | 0.01 | 1 |   |  | ; |
| 21713 | 207.671264648438 | 0.04 |   | 1 |  |   |
| ;     |                  |      |   |   |  |   |
| 21714 | 207.859222412109 | 0.00 |   | 1 |  |   |
| ;     |                  |      |   |   |  |   |
| 21715 | 206.659561157227 | 0.02 |   | 1 |  |   |
| ;     |                  |      |   |   |  |   |
| 21716 | 207.121932983398 | 0.03 |   | 1 |  |   |
| ;     |                  |      |   |   |  |   |
| 21717 | 206.725189208984 | 0.03 |   | 1 |  |   |

|       |                  |      |   |   |   |
|-------|------------------|------|---|---|---|
| ;     |                  |      |   |   |   |
| 21718 | 207.614395141602 | 0.03 |   | 1 |   |
| ;     |                  |      |   |   |   |
| 21719 | 206.191284179688 | 0.01 |   | 1 |   |
| ;     |                  |      |   |   |   |
| 21720 | 206.504135131836 | 0.01 |   | 1 |   |
| ;     |                  |      |   |   |   |
| 21721 | 206.372924804688 | 0.01 |   | 1 |   |
| ;     |                  |      |   |   |   |
| 21722 | 206.941055297852 | 0.06 |   | 1 |   |
| ;     |                  |      |   |   |   |
| 21723 | 207.35107421875  | 0.02 | 1 |   | ; |
| 21724 | 206.271286010742 | 0.02 |   | 1 |   |
| ;     |                  |      |   |   |   |
| 21725 | 205.939071655273 | 0.06 |   | 1 |   |
| ;     |                  |      |   |   |   |
| 21726 | 198.76725769043  | 0.01 | 1 |   | ; |
| 21727 | 198.724502563477 | 0.00 |   | 1 |   |
| ;     |                  |      |   |   |   |
| 21728 | 194.39453125     | 0.06 | 1 |   | ; |
| 21729 | 204.018661499023 | 0.03 |   | 1 |   |
| ;     |                  |      |   |   |   |
| 21730 | 204.099761962891 | 0.05 |   | 1 |   |
| ;     |                  |      |   |   |   |
| 21731 | 203.743225097656 | 0.00 |   | 1 |   |
| ;     |                  |      |   |   |   |
| 21732 | 203.755249023438 | 0.01 |   | 1 |   |
| ;     |                  |      |   |   |   |
| 21733 | 208.048004150391 | 0.01 |   | 1 |   |
| ;     |                  |      |   |   |   |
| 21734 | 208.662384033203 | 0.05 |   | 1 |   |
| ;     |                  |      |   |   |   |
| 21735 | 202.361511230469 | 0.01 |   | 1 |   |
| ;     |                  |      |   |   |   |
| 21736 | 202.469955444336 | 0.00 |   | 1 |   |
| ;     |                  |      |   |   |   |
| 21737 | 201.160919189453 | 0.02 |   | 1 |   |
| ;     |                  |      |   |   |   |
| 21738 | 201.145523071289 | 0.02 |   | 1 |   |
| ;     |                  |      |   |   |   |
| 21739 | 208.551391601563 | 0.03 |   | 1 |   |
| ;     |                  |      |   |   |   |
| 21740 | 208.789581298828 | 0.03 |   | 1 |   |
| ;     |                  |      |   |   |   |
| 21741 | 208.689468383789 | 0.05 |   | 1 |   |
| ;     |                  |      |   |   |   |
| 21742 | 208.362945556641 | 0.04 |   | 1 |   |
| ;     |                  |      |   |   |   |
| 21743 | 198.095581054688 | 0.02 |   | 1 |   |
| ;     |                  |      |   |   |   |

|       |                      |      |   |   |
|-------|----------------------|------|---|---|
| 21744 | 198.666213989258     | 0.01 | 1 |   |
| ;     |                      |      |   |   |
| 21745 | 198.707138061523     | 0.01 | 1 |   |
| ;     |                      |      |   |   |
| 21746 | 198.692230224609     | 0.00 | 1 |   |
| ;     |                      |      |   |   |
| 21747 | 214.54345703125 0.01 |      | 1 |   |
| 21748 | 214.798187255859     | 0.02 | 1 | ; |
| ;     |                      |      |   |   |
| 21749 | 218.710678100586     | 0.02 | 1 |   |
| ;     |                      |      |   |   |
| 21750 | 199.417495727539     | 0.01 | 1 |   |
| ;     |                      |      |   |   |
| 21751 | 199.991073608398     | 0.01 | 1 |   |
| ;     |                      |      |   |   |
| 21752 | 199.111953735352     | 0.02 | 1 |   |
| ;     |                      |      |   |   |
| 21753 | 208.422180175781     | 0.01 | 1 |   |
| ;     |                      |      |   |   |
| 21754 | 208.802856445312     | 0.01 | 1 |   |
| ;     |                      |      |   |   |
| 21755 | 208.034790039063     | 0.01 | 1 |   |
| ;     |                      |      |   |   |
| 21756 | 207.49186706543 0.02 |      | 1 |   |
| 21757 | 207.728240966797     | 0.02 | 1 | ; |
| ;     |                      |      |   |   |
| 21758 | 207.477920532227     | 0.00 | 1 |   |
| ;     |                      |      |   |   |
| 21759 | 207.478622436523     | 0.00 | 1 |   |
| ;     |                      |      |   |   |
| 21760 | 201.443603515625     | 0.03 | 1 |   |
| ;     |                      |      |   |   |
| 21761 | 201.68473815918 0.01 |      | 1 |   |
| 21762 | 201.770126342773     | 0.02 | 1 | ; |
| ;     |                      |      |   |   |
| 21763 | 196.011978149414     | 0.04 | 1 |   |
| ;     |                      |      |   |   |
| 21764 | 195.792526245117     | 0.03 | 1 |   |
| ;     |                      |      |   |   |
| 21765 | 206.540390014648     | 0.03 | 1 |   |
| ;     |                      |      |   |   |
| 21766 | 205.966064453125     | 0.09 | 1 |   |
| ;     |                      |      |   |   |
| 21767 | 206.95671081543 0.08 |      | 1 |   |
| 21768 | 205.920532226562     | 0.01 | 1 | ; |
| ;     |                      |      |   |   |
| 21769 | 206.254333496094     | 0.01 | 1 |   |
| ;     |                      |      |   |   |
| 21770 | 205.847259521484     | 0.01 | 1 |   |
| ;     |                      |      |   |   |

|       |                  |      |   |  |
|-------|------------------|------|---|--|
| 21771 | 206.208435058594 | 0.04 | 1 |  |
| ;     |                  |      |   |  |
| 21772 | 207.427139282227 | 0.05 | 1 |  |
| ;     |                  |      |   |  |
| 21773 | 205.211532592773 | 0.02 | 1 |  |
| ;     |                  |      |   |  |
| 21774 | 209.366821289063 | 0.03 | 1 |  |
| ;     |                  |      |   |  |
| 21775 | 210.242111206055 | 0.02 | 1 |  |
| ;     |                  |      |   |  |
| 21776 | 207.290878295898 | 0.01 | 1 |  |
| ;     |                  |      |   |  |
| 21777 | 207.281677246094 | 0.01 | 1 |  |
| ;     |                  |      |   |  |
| 21778 | 200.63005065918  | 0.01 | 1 |  |
| 21779 | 200.725219726563 | 0.02 | 1 |  |
| ;     |                  |      |   |  |
| 21780 | 200.648818969727 | 0.05 | 1 |  |
| ;     |                  |      |   |  |
| 21781 | 209.637008666992 | 0.05 | 1 |  |
| ;     |                  |      |   |  |
| 21782 | 209.12353515625  | 0.05 | 1 |  |
| 21783 | 216.70329284668  | 0.02 | 1 |  |
| 21784 | 201.128845214844 | 0.01 | 1 |  |
| ;     |                  |      |   |  |
| 21785 | 212.805068969727 | 0.01 | 1 |  |
| ;     |                  |      |   |  |
| 21786 | 203.811325073242 | 0.00 | 1 |  |
| ;     |                  |      |   |  |
| 21787 | 203.794723510742 | 0.01 | 1 |  |
| ;     |                  |      |   |  |
| 21788 | 227.997406005859 | 0.03 | 1 |  |
| ;     |                  |      |   |  |
| 21789 | 220.009384155273 | 0.06 | 1 |  |
| ;     |                  |      |   |  |
| 21790 | 220.477981567383 | 0.03 | 1 |  |
| ;     |                  |      |   |  |
| 21791 | 220              | 0.02 | 1 |  |
| 21792 | 220              | 0.02 | 1 |  |
| 21793 | 220.168014526367 | 0.00 | 1 |  |
| ;     |                  |      |   |  |
| 21794 | 220.111663818359 | 0.02 | 1 |  |
| ;     |                  |      |   |  |
| 21795 | 220.257080078125 | 0.03 | 1 |  |
| ;     |                  |      |   |  |
| 21796 | 219.788513183594 | 0.01 | 1 |  |
| ;     |                  |      |   |  |
| 21797 | 199.185089111328 | 0.01 | 1 |  |
| ;     |                  |      |   |  |
| 21798 | 195              | 0.01 | 1 |  |

|       |                  |      |   |   |
|-------|------------------|------|---|---|
| 21799 | 193.999481201172 | 0.01 | 1 |   |
| ;     |                  |      |   |   |
| 21800 | 190.97705078125  | 0.02 | 1 | ; |
| 21801 | 193.263107299805 | 0.02 | 1 |   |
| ;     |                  |      |   |   |
| 21802 | 190.743988037109 | 0.02 | 1 |   |
| ;     |                  |      |   |   |
| 21803 | 193.835296630859 | 0.02 | 1 |   |
| ;     |                  |      |   |   |
| 21804 | 194.657073974609 | 0.01 | 1 |   |
| ;     |                  |      |   |   |
| 21805 | 194.414169311523 | 0.01 | 1 |   |
| ;     |                  |      |   |   |
| 21806 | 193.917282104492 | 0.01 | 1 |   |
| ;     |                  |      |   |   |
| 21807 | 193.877258300781 | 0.02 | 1 |   |
| ;     |                  |      |   |   |
| 21808 | 192.691268920898 | 0.01 | 1 |   |
| ;     |                  |      |   |   |
| 21809 | 193.286468505859 | 0.02 | 1 |   |
| ;     |                  |      |   |   |
| 21810 | 206.737319946289 | 0.21 | 1 |   |
| ;     |                  |      |   |   |
| 21811 | 207.840576171875 | 0.03 | 1 |   |
| ;     |                  |      |   |   |
| 21812 | 208.993301391602 | 0.02 | 1 |   |
| ;     |                  |      |   |   |
| 21813 | 208.550857543945 | 0.02 | 1 |   |
| ;     |                  |      |   |   |
| 21814 | 205.360778808594 | 0.02 | 1 |   |
| ;     |                  |      |   |   |
| 21815 | 205.652084350586 | 0.02 | 1 |   |
| ;     |                  |      |   |   |
| 21816 | 205.301742553711 | 0.01 | 1 |   |
| ;     |                  |      |   |   |
| 21817 | 205.404739379883 | 0.01 | 1 |   |
| ;     |                  |      |   |   |
| 21818 | 206.719161987305 | 0.36 | 1 |   |
| ;     |                  |      |   |   |
| 21819 | 207.160781860352 | 0.15 | 1 |   |
| ;     |                  |      |   |   |
| 21820 | 198.552963256836 | 0.01 | 1 |   |
| ;     |                  |      |   |   |
| 21821 | 219.296875       | 0.00 | 1 | ; |
| 21822 | 219.081283569336 | 0.02 | 1 |   |
| ;     |                  |      |   |   |
| 21823 | 195.70426940918  | 0.01 | 1 | ; |
| 21824 | 196.159057617188 | 0.01 | 1 |   |
| ;     |                  |      |   |   |
| 21825 | 195.392974853516 | 0.03 | 1 |   |

|       |                  |      |   |   |   |
|-------|------------------|------|---|---|---|
| ;     |                  |      |   |   |   |
| 21826 | 195.409408569336 | 0.00 |   | 1 |   |
| ;     |                  |      |   |   |   |
| 21827 | 200.65641784668  | 0.00 | 1 |   | ; |
| 21828 | 200.427215576172 | 0.00 |   | 1 |   |
| ;     |                  |      |   |   |   |
| 21829 | 217.393035888672 | 0.00 |   | 1 |   |
| ;     |                  |      |   |   |   |
| 21830 | 216.474884033203 | 0.01 |   | 1 |   |
| ;     |                  |      |   |   |   |
| 21831 | 216.85578918457  | 0.00 | 1 |   | ; |
| 21832 | 218.020645141602 | 0.02 |   | 1 |   |
| ;     |                  |      |   |   |   |
| 21833 | 218.448501586914 | 0.00 |   | 1 |   |
| ;     |                  |      |   |   |   |
| 21834 | 218.063980102539 | 0.02 |   | 1 |   |
| ;     |                  |      |   |   |   |
| 21835 | 218.797409057617 | 0.03 |   | 1 |   |
| ;     |                  |      |   |   |   |
| 21836 | 218.520263671875 | 0.00 |   | 1 |   |
| ;     |                  |      |   |   |   |
| 21837 | 217.432754516602 | 0.01 |   | 1 |   |
| ;     |                  |      |   |   |   |
| 21838 | 217.85710144043  | 0.02 | 1 |   | ; |
| 21839 | 197.46516418457  | 0.02 | 1 |   | ; |
| 21840 | 197.800872802734 | 0.01 |   | 1 |   |
| ;     |                  |      |   |   |   |
| 21841 | 197.530303955078 | 0.01 |   | 1 |   |
| ;     |                  |      |   |   |   |
| 21842 | 197.493041992188 | 0.03 |   | 1 |   |
| ;     |                  |      |   |   |   |
| 21843 | 197.220077514648 | 0.03 |   | 1 |   |
| ;     |                  |      |   |   |   |
| 21844 | 196.74967956543  | 0.01 | 1 |   | ; |
| 21845 | 229.601943969727 | 0.03 |   | 1 |   |
| ;     |                  |      |   |   |   |
| 21846 | 230.044631958008 | 0.03 |   | 1 |   |
| ;     |                  |      |   |   |   |
| 21847 | 229.80859375     | 0.00 | 1 |   | ; |
| 21848 | 229.590255737305 | 0.00 |   | 1 |   |
| ;     |                  |      |   |   |   |
| 21849 | 192.935958862305 | 0.02 |   | 1 |   |
| ;     |                  |      |   |   |   |
| 21850 | 193.229110717773 | 0.01 |   | 1 |   |
| ;     |                  |      |   |   |   |
| 21851 | 231.281265258789 | 0.02 |   | 1 |   |
| ;     |                  |      |   |   |   |
| 21852 | 231.528060913086 | 0.02 |   | 1 |   |
| ;     |                  |      |   |   |   |
| 21853 | 200.568939208984 | 0.01 |   | 1 |   |

|       |                      |      |   |   |
|-------|----------------------|------|---|---|
| ;     |                      |      |   |   |
| 21854 | 203.080902099609     | 0.01 | 1 |   |
| ;     |                      |      |   |   |
| 21855 | 203.107009887695     | 0.01 | 1 |   |
| ;     |                      |      |   |   |
| 21856 | 204.056335449219     | 0.09 | 1 |   |
| ;     |                      |      |   |   |
| 21857 | 204.196670532227     | 0.00 | 1 |   |
| ;     |                      |      |   |   |
| 21858 | 203.277252197266     | 0.00 | 1 |   |
| ;     |                      |      |   |   |
| 21859 | 204.085830688477     | 0.09 | 1 |   |
| ;     |                      |      |   |   |
| 21860 | 200.938568115234     | 0.00 | 1 |   |
| ;     |                      |      |   |   |
| 21861 | 200.403961181641     | 0.00 | 1 |   |
| ;     |                      |      |   |   |
| 21862 | 202.793121337891     | 0.00 | 1 |   |
| ;     |                      |      |   |   |
| 21863 | 202.920257568359     | 0.00 | 1 |   |
| ;     |                      |      |   |   |
| 21864 | 231.724212646484     | 0.01 | 1 |   |
| ;     |                      |      |   |   |
| 21865 | 219.295593261719     | 0.07 | 1 |   |
| ;     |                      |      |   |   |
| 21866 | 219.174041748047     | 0.04 | 1 |   |
| ;     |                      |      |   |   |
| 21867 | 219.307113647461     | 0.02 | 1 |   |
| ;     |                      |      |   |   |
| 21868 | 219.932708740234     | 0.01 | 1 |   |
| ;     |                      |      |   |   |
| 21869 | 201.936828613281     | 0.17 | 1 |   |
| ;     |                      |      |   |   |
| 21870 | 202.522750854492     | 0.00 | 1 |   |
| ;     |                      |      |   |   |
| 21871 | 202.834106445313     | 0.10 | 1 |   |
| ;     |                      |      |   |   |
| 21872 | 206.601760864258     | 0.00 | 1 |   |
| ;     |                      |      |   |   |
| 21873 | 200.53742980957 0.00 |      | 1 | ; |
| 21874 | 200.38996887207 0.00 |      | 1 | ; |
| 21875 | 193.951217651367     | 0.00 | 1 |   |
| ;     |                      |      |   |   |
| 21876 | 199.464599609375     | 0.12 | 1 |   |
| ;     |                      |      |   |   |
| 21877 | 196.537414550781     | 0.12 | 1 |   |
| ;     |                      |      |   |   |
| 21878 | 227.80680847168 0.01 |      | 1 | ; |
| 21879 | 227.93115234375 0.01 |      | 1 | ; |
| 21880 | 227.686599731445     | 0.01 | 1 |   |

|       |                  |      |   |   |   |
|-------|------------------|------|---|---|---|
| ;     |                  |      |   |   |   |
| 21881 | 227.842697143555 | 0.00 |   | 1 |   |
| ;     |                  |      |   |   |   |
| 21882 | 225.709442138672 | 0.08 |   | 1 |   |
| ;     |                  |      |   |   |   |
| 21883 | 227.22834777832  | 0.08 | 1 |   | ; |
| 21884 | 228.014190673828 | 0.02 |   | 1 |   |
| ;     |                  |      |   |   |   |
| 21885 | 228.799026489258 | 0.03 |   | 1 |   |
| ;     |                  |      |   |   |   |
| 21886 | 236.63053894043  | 0.03 | 1 |   | ; |
| 21887 | 236.718887329102 | 0.01 |   | 1 |   |
| ;     |                  |      |   |   |   |
| 21888 | 229.507827758789 | 0.03 |   | 1 |   |
| ;     |                  |      |   |   |   |
| 21889 | 201.186981201172 | 0.04 |   | 1 |   |
| ;     |                  |      |   |   |   |
| 21890 | 201.320648193359 | 0.01 |   | 1 |   |
| ;     |                  |      |   |   |   |
| 21891 | 202.360794067383 | 0.04 |   | 1 |   |
| ;     |                  |      |   |   |   |
| 21892 | 202.416366577148 | 0.01 |   | 1 |   |
| ;     |                  |      |   |   |   |
| 21893 | 200              | 0.01 | 1 |   | ; |
| 21894 | 200              | 0.00 | 1 |   | ; |
| 21895 | 195.655487060547 | 0.02 |   | 1 |   |
| ;     |                  |      |   |   |   |
| 21896 | 195.452667236328 | 0.04 |   | 1 |   |
| ;     |                  |      |   |   |   |
| 21897 | 195.38053894043  | 0.02 | 1 |   | ; |
| 21898 | 195.233444213867 | 0.02 |   | 1 |   |
| ;     |                  |      |   |   |   |
| 21899 | 194.961837768555 | 0.01 |   | 1 |   |
| ;     |                  |      |   |   |   |
| 21900 | 195.758499145508 | 0.01 |   | 1 |   |
| ;     |                  |      |   |   |   |
| 21901 | 195.834243774414 | 0.02 |   | 1 |   |
| ;     |                  |      |   |   |   |
| 21902 | 196.099487304688 | 0.02 |   | 1 |   |
| ;     |                  |      |   |   |   |
| 21903 | 195.683715820313 | 0.03 |   | 1 |   |
| ;     |                  |      |   |   |   |
| 21904 | 196.160675048828 | 0.03 |   | 1 |   |
| ;     |                  |      |   |   |   |
| 21905 | 195.866333007813 | 0.02 |   | 1 |   |
| ;     |                  |      |   |   |   |
| 21906 | 196.16828918457  | 0.03 | 1 |   | ; |
| 21907 | 198.097885131836 | 0.06 |   | 1 |   |
| ;     |                  |      |   |   |   |
| 21908 | 198.005355834961 | 0.01 |   | 1 |   |



|       |                  |      |   |   |
|-------|------------------|------|---|---|
| ;     |                  |      |   |   |
| 21909 | 198.923202514648 | 0.06 | 1 |   |
| ;     |                  |      |   |   |
| 21910 | 197.496826171875 | 0.03 | 1 |   |
| ;     |                  |      |   |   |
| 21911 | 196.832763671875 | 0.02 | 1 |   |
| ;     |                  |      |   |   |
| 21912 | 197.179260253906 | 0.03 | 1 |   |
| ;     |                  |      |   |   |
| 21913 | 190.678909301758 | 0.01 | 1 |   |
| ;     |                  |      |   |   |
| 21914 | 190.763000488281 | 0.03 | 1 |   |
| ;     |                  |      |   |   |
| 21915 | 199.609268188477 | 0.01 | 1 |   |
| ;     |                  |      |   |   |
| 21916 | 199.026321411133 | 0.02 | 1 |   |
| ;     |                  |      |   |   |
| 21917 | 199.976531982422 | 0.05 | 1 |   |
| ;     |                  |      |   |   |
| 21918 | 201.003128051758 | 0.03 | 1 |   |
| ;     |                  |      |   |   |
| 21919 | 200.120742797852 | 0.03 | 1 |   |
| ;     |                  |      |   |   |
| 21920 | 198.890884399414 | 0.04 | 1 |   |
| ;     |                  |      |   |   |
| 21921 | 198.840484619141 | 0.03 | 1 |   |
| ;     |                  |      |   |   |
| 21922 | 198.412673950195 | 0.02 | 1 |   |
| ;     |                  |      |   |   |
| 21923 | 196.674407958984 | 0.00 | 1 |   |
| ;     |                  |      |   |   |
| 21924 | 196.807556152344 | 0.01 | 1 |   |
| ;     |                  |      |   |   |
| 21925 | 199.067047119141 | 0.03 | 1 |   |
| ;     |                  |      |   |   |
| 21926 | 231.599563598633 | 0.01 | 1 |   |
| ;     |                  |      |   |   |
| 21927 | 231.550094604492 | 0.08 | 1 |   |
| ;     |                  |      |   |   |
| 21928 | 233.770294189453 | 0.02 | 1 |   |
| ;     |                  |      |   |   |
| 21929 | 231.390640258789 | 0.04 | 1 |   |
| ;     |                  |      |   |   |
| 21930 | 196.79963684082  | 0.02 | 1 |   |
| 21931 | 196.745513916016 | 0.02 | 1 | ; |
| ;     |                  |      |   |   |
| 21932 | 230.023193359375 | 0.03 | 1 |   |
| ;     |                  |      |   |   |
| 21933 | 201.869567871094 | 0.05 | 1 |   |
| ;     |                  |      |   |   |

|       |                  |      |   |   |
|-------|------------------|------|---|---|
| 21934 | 201.957580566406 | 0.02 | 1 |   |
| ;     |                  |      |   |   |
| 21935 | 201.802017211914 | 0.03 | 1 |   |
| ;     |                  |      |   |   |
| 21936 | 228.464492797852 | 0.01 | 1 |   |
| ;     |                  |      |   |   |
| 21937 | 228.183486938477 | 0.02 | 1 |   |
| ;     |                  |      |   |   |
| 21938 | 200.976867675781 | 0.03 | 1 |   |
| ;     |                  |      |   |   |
| 21939 | 200.883666992188 | 0.05 | 1 |   |
| ;     |                  |      |   |   |
| 21940 | 200              | 0.01 | 1 | ; |
| 21941 | 200              | 0.01 | 1 | ; |
| 21942 | 195.231430053711 | 0.02 | 1 |   |
| ;     |                  |      |   |   |
| 21943 | 196.227355957031 | 0.03 | 1 |   |
| ;     |                  |      |   |   |
| 21944 | 196.246368408203 | 0.03 | 1 |   |
| ;     |                  |      |   |   |
| 21945 | 230.264526367187 | 0.01 | 1 |   |
| ;     |                  |      |   |   |
| 21946 | 207.810073852539 | 0.02 | 1 |   |
| ;     |                  |      |   |   |
| 21947 | 207.826675415039 | 0.03 | 1 |   |
| ;     |                  |      |   |   |
| 21948 | 218.57487487793  | 0.00 | 1 | ; |
| 21949 | 211.241928100586 | 0.03 | 1 |   |
| ;     |                  |      |   |   |
| 21950 | 211.238983154297 | 0.02 | 1 |   |
| ;     |                  |      |   |   |
| 21951 | 203.576950073242 | 0.00 | 1 |   |
| ;     |                  |      |   |   |
| 21952 | 203.558364868164 | 0.00 | 1 |   |
| ;     |                  |      |   |   |
| 21953 | 202.930282592773 | 0.00 | 1 |   |
| ;     |                  |      |   |   |
| 21954 | 202.91667175293  | 0.00 | 1 | ; |
| 21955 | 205.605072021484 | 0.00 | 1 |   |
| ;     |                  |      |   |   |
| 21956 | 205.472076416016 | 0.00 | 1 |   |
| ;     |                  |      |   |   |
| 21957 | 235.355575561523 | 0.02 | 1 |   |
| ;     |                  |      |   |   |
| 21958 | 199.352645874023 | 0.00 | 1 |   |
| ;     |                  |      |   |   |
| 21959 | 199.313049316406 | 0.00 | 1 |   |
| ;     |                  |      |   |   |
| 21960 | 199.552261352539 | 0.01 | 1 |   |
| ;     |                  |      |   |   |

|       |                  |      |   |   |   |  |
|-------|------------------|------|---|---|---|--|
| 21961 | 200              | 0.00 | 1 |   |   |  |
| 21962 | 197.436340332031 | 0.00 |   | 1 |   |  |
| ;     |                  |      |   |   |   |  |
| 21963 | 198.976531982422 | 0.01 |   |   | 1 |  |
| ;     |                  |      |   |   |   |  |
| 21964 | 198.98454284668  | 0.02 | 1 |   |   |  |
| 21965 | 218.409683227539 | 0.02 |   |   | 1 |  |
| ;     |                  |      |   |   |   |  |
| 21966 | 218.227798461914 | 0.01 |   |   | 1 |  |
| ;     |                  |      |   |   |   |  |
| 21967 | 205.934341430664 | 0.01 |   |   | 1 |  |
| ;     |                  |      |   |   |   |  |
| 21968 | 205.959197998047 | 0.00 |   |   | 1 |  |
| ;     |                  |      |   |   |   |  |
| 21969 | 205.975402832031 | 0.00 |   |   | 1 |  |
| ;     |                  |      |   |   |   |  |
| 21970 | 205.850326538086 | 0.00 |   |   | 1 |  |
| ;     |                  |      |   |   |   |  |
| 21971 | 206.394577026367 | 0.02 |   |   | 1 |  |
| ;     |                  |      |   |   |   |  |
| 21972 | 206.026428222656 | 0.04 |   |   | 1 |  |
| ;     |                  |      |   |   |   |  |
| 21973 | 206.749786376953 | 0.01 |   |   | 1 |  |
| ;     |                  |      |   |   |   |  |
| 21974 | 206.31184387207  | 0.01 | 1 |   |   |  |
| 21975 | 198.498901367188 | 0.01 |   |   | 1 |  |
| ;     |                  |      |   |   |   |  |
| 21976 | 198.490463256836 | 0.01 |   |   | 1 |  |
| ;     |                  |      |   |   |   |  |
| 21977 | 198.380706787109 | 0.01 |   |   | 1 |  |
| ;     |                  |      |   |   |   |  |
| 21978 | 198.486770629883 | 0.05 |   |   | 1 |  |
| ;     |                  |      |   |   |   |  |
| 21979 | 196.063995361328 | 0.00 |   |   | 1 |  |
| ;     |                  |      |   |   |   |  |
| 21980 | 196.132766723633 | 0.04 |   |   | 1 |  |
| ;     |                  |      |   |   |   |  |
| 21981 | 198.010437011719 | 0.01 |   |   | 1 |  |
| ;     |                  |      |   |   |   |  |
| 21982 | 192.103912353516 | 0.01 |   |   | 1 |  |
| ;     |                  |      |   |   |   |  |
| 21983 | 191.802841186523 | 0.05 |   |   | 1 |  |
| ;     |                  |      |   |   |   |  |
| 21984 | 194.065887451172 | 0.00 |   |   | 1 |  |
| ;     |                  |      |   |   |   |  |
| 21985 | 199.982925415039 | 0.01 |   |   | 1 |  |
| ;     |                  |      |   |   |   |  |
| 21986 | 195.282440185547 | 0.06 |   |   | 1 |  |
| ;     |                  |      |   |   |   |  |
| 21987 | 195.032180786133 | 0.00 |   |   | 1 |  |

|       |                      |      |   |   |
|-------|----------------------|------|---|---|
| ;     |                      |      |   |   |
| 21988 | 198.918579101563     | 0.03 |   | 1 |
| ;     |                      |      |   |   |
| 21989 | 200.03840637207 0.03 |      | 1 |   |
| 21990 | 199.104461669922     | 0.01 |   | 1 |
| ;     |                      |      |   |   |
| 21991 | 199.557083129883     | 0.00 |   | 1 |
| ;     |                      |      |   |   |
| 21992 | 199.519226074219     | 0.01 |   | 1 |
| ;     |                      |      |   |   |
| 21993 | 199.454986572266     | 0.01 |   | 1 |
| ;     |                      |      |   |   |
| 21994 | 199.406143188477     | 0.01 |   | 1 |
| ;     |                      |      |   |   |
| 21995 | 198.952484130859     | 0.02 |   | 1 |
| ;     |                      |      |   |   |
| 21996 | 194.682815551758     | 0.00 |   | 1 |
| ;     |                      |      |   |   |
| 21997 | 194.749435424805     | 0.00 |   | 1 |
| ;     |                      |      |   |   |
| 21998 | 194.39762878418 0.00 |      | 1 |   |
| 21999 | 229.803558349609     | 0.00 |   | 1 |
| ;     |                      |      |   |   |
| 22000 | 229.802093505859     | 0.00 |   | 1 |
| ;     |                      |      |   |   |
| 22001 | 199.814651489258     | 0.00 |   | 1 |
| ;     |                      |      |   |   |
| 22002 | 199.146255493164     | 0.00 |   | 1 |
| ;     |                      |      |   |   |
| 22003 | 199.156845092773     | 0.06 |   | 1 |
| ;     |                      |      |   |   |
| 22004 | 199.135650634766     | 0.01 |   | 1 |
| ;     |                      |      |   |   |
| 22005 | 197.553100585937     | 0.01 |   | 1 |
| ;     |                      |      |   |   |
| 22006 | 197.564849853516     | 0.06 |   | 1 |
| ;     |                      |      |   |   |
| 22007 | 197.610198974609     | 0.01 |   | 1 |
| ;     |                      |      |   |   |
| 22008 | 198.072799682617     | 0.03 |   | 1 |
| ;     |                      |      |   |   |
| 22009 | 198.089050292969     | 0.03 |   | 1 |
| ;     |                      |      |   |   |
| 22010 | 209.198348999023     | 0.02 |   | 1 |
| ;     |                      |      |   |   |
| 22011 | 208.931793212891     | 0.02 |   | 1 |
| ;     |                      |      |   |   |
| 22012 | 208.939819335938     | 0.04 |   | 1 |
| ;     |                      |      |   |   |
| 22013 | 209.208801269531     | 0.00 |   | 1 |

|       |                      |      |   |   |   |
|-------|----------------------|------|---|---|---|
| ;     |                      |      |   |   |   |
| 22014 | 209.216766357422     | 0.02 |   | 1 |   |
| ;     |                      |      |   |   |   |
| 22015 | 209.200836181641     | 0.02 |   | 1 |   |
| ;     |                      |      |   |   |   |
| 22016 | 207.264663696289     | 0.03 |   | 1 |   |
| ;     |                      |      |   |   |   |
| 22017 | 207.355621337891     | 0.06 |   | 1 |   |
| ;     |                      |      |   |   |   |
| 22018 | 201.710235595703     | 0.01 |   | 1 |   |
| ;     |                      |      |   |   |   |
| 22019 | 201.308731079102     | 0.01 |   | 1 |   |
| ;     |                      |      |   |   |   |
| 22020 | 201.09814453125 0.00 |      | 1 |   | ; |
| 22021 | 213.781585693359     | 0.02 |   | 1 |   |
| ;     |                      |      |   |   |   |
| 22022 | 213.842193603516     | 0.00 |   | 1 |   |
| ;     |                      |      |   |   |   |
| 22023 | 205.952774047852     | 0.02 |   | 1 |   |
| ;     |                      |      |   |   |   |
| 22024 | 206.244735717773     | 0.00 |   | 1 |   |
| ;     |                      |      |   |   |   |
| 22025 | 203.563659667969     | 0.01 |   | 1 |   |
| ;     |                      |      |   |   |   |
| 22026 | 202.993988037109     | 0.02 |   | 1 |   |
| ;     |                      |      |   |   |   |
| 22027 | 203.669891357422     | 0.05 |   | 1 |   |
| ;     |                      |      |   |   |   |
| 22028 | 204.861724853516     | 0.12 |   | 1 |   |
| ;     |                      |      |   |   |   |
| 22029 | 202.473999023438     | 0.00 |   | 1 |   |
| ;     |                      |      |   |   |   |
| 22030 | 202.30632019043 0.00 |      | 1 |   | ; |
| 22031 | 204.130187988281     | 0.02 |   | 1 |   |
| ;     |                      |      |   |   |   |
| 22032 | 203.805480957031     | 0.02 |   | 1 |   |
| ;     |                      |      |   |   |   |
| 22033 | 210.935546875 0.00   |      | 1 |   | ; |
| 22034 | 210.934616088867     | 0.00 |   | 1 |   |
| ;     |                      |      |   |   |   |
| 22035 | 210.520751953125     | 0.02 |   | 1 |   |
| ;     |                      |      |   |   |   |
| 22036 | 210.603500366211     | 0.02 |   | 1 |   |
| ;     |                      |      |   |   |   |
| 22037 | 208.939666748047     | 0.12 |   | 1 |   |
| ;     |                      |      |   |   |   |
| 22038 | 209.350189208984     | 0.09 |   | 1 |   |
| ;     |                      |      |   |   |   |
| 22039 | 207.432464599609     | 0.03 |   | 1 |   |
| ;     |                      |      |   |   |   |

|       |                  |      |   |   |
|-------|------------------|------|---|---|
| 22040 | 206.673400878906 | 0.02 | 1 |   |
| ;     |                  |      |   |   |
| 22041 | 207.080307006836 | 0.03 | 1 |   |
| ;     |                  |      |   |   |
| 22042 | 213.876129150391 | 0.06 | 1 |   |
| ;     |                  |      |   |   |
| 22043 | 213.379165649414 | 0.08 | 1 |   |
| ;     |                  |      |   |   |
| 22044 | 214.063995361328 | 0.04 | 1 |   |
| ;     |                  |      |   |   |
| 22045 | 213.778747558594 | 0.04 | 1 |   |
| ;     |                  |      |   |   |
| 22046 | 198.425537109375 | 0.00 | 1 |   |
| ;     |                  |      |   |   |
| 22047 | 197.653060913086 | 0.02 | 1 |   |
| ;     |                  |      |   |   |
| 22048 | 197.82991027832  | 0.02 | 1 |   |
| 22049 | 198.363510131836 | 0.01 | 1 | ; |
| ;     |                  |      |   |   |
| 22050 | 197.836120605469 | 0.02 | 1 |   |
| ;     |                  |      |   |   |
| 22051 | 199.202224731445 | 0.01 | 1 |   |
| ;     |                  |      |   |   |
| 22052 | 198.115539550781 | 0.13 | 1 |   |
| ;     |                  |      |   |   |
| 22053 | 218.849990844727 | 0.02 | 1 |   |
| ;     |                  |      |   |   |
| 22054 | 196.388427734375 | 0.01 | 1 |   |
| ;     |                  |      |   |   |
| 22055 | 214.446258544922 | 0.04 | 1 |   |
| ;     |                  |      |   |   |
| 22056 | 214.245193481445 | 0.02 | 1 |   |
| ;     |                  |      |   |   |
| 22057 | 214.271575927734 | 0.01 | 1 |   |
| ;     |                  |      |   |   |
| 22058 | 206.510482788086 | 0.02 | 1 |   |
| ;     |                  |      |   |   |
| 22059 | 214.14582824707  | 0.03 | 1 | ; |
| 22060 | 214.521987915039 | 0.00 | 1 |   |
| ;     |                  |      |   |   |
| 22061 | 209.446823120117 | 0.01 | 1 |   |
| ;     |                  |      |   |   |
| 22062 | 209.946838378906 | 0.00 | 1 |   |
| ;     |                  |      |   |   |
| 22063 | 212.955001831055 | 0.07 | 1 |   |
| ;     |                  |      |   |   |
| 22064 | 213.351989746094 | 0.06 | 1 |   |
| ;     |                  |      |   |   |
| 22065 | 213.328109741211 | 0.03 | 1 |   |
| ;     |                  |      |   |   |

|       |                      |      |  |   |  |
|-------|----------------------|------|--|---|--|
| 22066 | 213.33366394043 0.07 | 1    |  |   |  |
| 22067 | 217.763442993164     | 0.22 |  | 1 |  |
| ;     |                      |      |  |   |  |
| 22068 | 217.229034423828     | 0.01 |  | 1 |  |
| ;     |                      |      |  |   |  |
| 22069 | 233.765014648438     | 0.01 |  | 1 |  |
| ;     |                      |      |  |   |  |
| 22070 | 233.943222045898     | 0.01 |  | 1 |  |
| ;     |                      |      |  |   |  |
| 22071 | 235.291458129883     | 0.01 |  | 1 |  |
| ;     |                      |      |  |   |  |
| 22072 | 234.327285766602     | 0.14 |  | 1 |  |
| ;     |                      |      |  |   |  |
| 22073 | 234.34602355957 0.28 | 1    |  |   |  |
| 22074 | 190.736251831055     | 0.03 |  | 1 |  |
| ;     |                      |      |  |   |  |
| 22075 | 190.654663085938     | 0.03 |  | 1 |  |
| ;     |                      |      |  |   |  |
| 22076 | 203.821060180664     | 0.00 |  | 1 |  |
| ;     |                      |      |  |   |  |
| 22077 | 203.749404907227     | 0.12 |  | 1 |  |
| ;     |                      |      |  |   |  |
| 22078 | 202.398849487305     | 0.04 |  | 1 |  |
| ;     |                      |      |  |   |  |
| 22079 | 202.525314331055     | 0.04 |  | 1 |  |
| ;     |                      |      |  |   |  |
| 22080 | 201.544906616211     | 0.00 |  | 1 |  |
| ;     |                      |      |  |   |  |
| 22081 | 227.638366699219     | 0.03 |  | 1 |  |
| ;     |                      |      |  |   |  |
| 22082 | 227.090148925781     | 0.04 |  | 1 |  |
| ;     |                      |      |  |   |  |
| 22083 | 225.558334350586     | 0.03 |  | 1 |  |
| ;     |                      |      |  |   |  |
| 22084 | 225.488922119141     | 0.00 |  | 1 |  |
| ;     |                      |      |  |   |  |
| 22085 | 225.393081665039     | 0.03 |  | 1 |  |
| ;     |                      |      |  |   |  |
| 22086 | 225.700622558594     | 0.03 |  | 1 |  |
| ;     |                      |      |  |   |  |
| 22087 | 233.948516845703     | 0.01 |  | 1 |  |
| ;     |                      |      |  |   |  |
| 22088 | 234.255325317383     | 0.00 |  | 1 |  |
| ;     |                      |      |  |   |  |
| 22089 | 234.622344970703     | 0.02 |  | 1 |  |
| ;     |                      |      |  |   |  |
| 22090 | 234.280670166016     | 0.03 |  | 1 |  |
| ;     |                      |      |  |   |  |
| 22091 | 233.653106689453     | 0.00 |  | 1 |  |
| ;     |                      |      |  |   |  |

|       |                  |      |   |
|-------|------------------|------|---|
| 22092 | 193.308731079102 | 0.03 | 1 |
| ;     |                  |      |   |
| 22093 | 193.080856323242 | 0.03 | 1 |
| ;     |                  |      |   |
| 22094 | 192.840316772461 | 0.04 | 1 |
| ;     |                  |      |   |
| 22095 | 192.913421630859 | 0.01 | 1 |
| ;     |                  |      |   |
| 22096 | 192.845993041992 | 0.01 | 1 |
| ;     |                  |      |   |
| 22097 | 192.904708862305 | 0.02 | 1 |
| ;     |                  |      |   |
| 22098 | 192.332565307617 | 0.01 | 1 |
| ;     |                  |      |   |
| 22099 | 224.731521606445 | 0.07 | 1 |
| ;     |                  |      |   |
| 22100 | 197.766372680664 | 0.00 | 1 |
| ;     |                  |      |   |
| 22101 | 197.990615844727 | 0.01 | 1 |
| ;     |                  |      |   |
| 22102 | 198.859802246094 | 0.03 | 1 |
| ;     |                  |      |   |
| 22103 | 209.817504882813 | 0.00 | 1 |
| ;     |                  |      |   |
| 22104 | 209.843841552734 | 0.03 | 1 |
| ;     |                  |      |   |
| 22105 | 208.260589599609 | 0.02 | 1 |
| ;     |                  |      |   |
| 22106 | 208.112365722656 | 0.03 | 1 |
| ;     |                  |      |   |
| 22107 | 206.977569580078 | 0.01 | 1 |
| ;     |                  |      |   |
| 22108 | 206.705047607422 | 0.00 | 1 |
| ;     |                  |      |   |
| 22109 | 193.587844848633 | 0.01 | 1 |
| ;     |                  |      |   |
| 22110 | 193.053558349609 | 0.01 | 1 |
| ;     |                  |      |   |
| 22111 | 232.764541625977 | 0.00 | 1 |
| ;     |                  |      |   |
| 22112 | 232.340621948242 | 0.01 | 1 |
| ;     |                  |      |   |
| 22113 | 232.201904296875 | 0.09 | 1 |
| ;     |                  |      |   |
| 22114 | 232.468719482422 | 0.02 | 1 |
| ;     |                  |      |   |
| 22115 | 204.873443603516 | 0.02 | 1 |
| ;     |                  |      |   |
| 22116 | 204.142333984375 | 0.02 | 1 |
| ;     |                  |      |   |



|       |                  |      |   |   |
|-------|------------------|------|---|---|
| 22117 | 203.163925170898 | 0.03 | 1 |   |
| ;     |                  |      |   |   |
| 22118 | 203.577209472656 | 0.04 | 1 |   |
| ;     |                  |      |   |   |
| 22119 | 203.619781494141 | 0.01 | 1 |   |
| ;     |                  |      |   |   |
| 22120 | 203.593292236328 | 0.00 | 1 |   |
| ;     |                  |      |   |   |
| 22121 | 208.293746948242 | 0.02 | 1 |   |
| ;     |                  |      |   |   |
| 22122 | 225.251052856445 | 0.01 | 1 |   |
| ;     |                  |      |   |   |
| 22123 | 224.705688476563 | 0.01 | 1 |   |
| ;     |                  |      |   |   |
| 22124 | 225.178695678711 | 0.09 | 1 |   |
| ;     |                  |      |   |   |
| 22125 | 225.701461791992 | 0.00 | 1 |   |
| ;     |                  |      |   |   |
| 22126 | 226.608047485352 | 0.00 | 1 |   |
| ;     |                  |      |   |   |
| 22127 | 226.174530029297 | 0.02 | 1 |   |
| ;     |                  |      |   |   |
| 22128 | 226.562637329102 | 0.07 | 1 |   |
| ;     |                  |      |   |   |
| 22129 | 226.589935302734 | 0.00 | 1 |   |
| ;     |                  |      |   |   |
| 22130 | 205.072601318359 | 0.02 | 1 |   |
| ;     |                  |      |   |   |
| 22131 | 205.116119384766 | 0.02 | 1 |   |
| ;     |                  |      |   |   |
| 22132 | 217.289840698242 | 0.01 | 1 |   |
| ;     |                  |      |   |   |
| 22133 | 217.298645019531 | 0.02 | 1 |   |
| ;     |                  |      |   |   |
| 22134 | 217.327896118164 | 0.05 | 1 |   |
| ;     |                  |      |   |   |
| 22135 | 217.209106445313 | 0.07 | 1 |   |
| ;     |                  |      |   |   |
| 22136 | 218.112243652344 | 0.02 | 1 |   |
| ;     |                  |      |   |   |
| 22137 | 218.287475585937 | 0.03 | 1 |   |
| ;     |                  |      |   |   |
| 22138 | 217.852569580078 | 0.01 | 1 |   |
| ;     |                  |      |   |   |
| 22139 | 217.67756652832  | 0.03 | 1 |   |
| 22140 | 217.856750488281 | 0.00 | 1 | ; |
| ;     |                  |      |   |   |
| 22141 | 217.909698486328 | 0.03 | 1 |   |
| ;     |                  |      |   |   |
| 22142 | 207.945922851563 | 0.02 | 1 |   |

|       |                  |      |   |   |   |
|-------|------------------|------|---|---|---|
| ;     |                  |      |   |   |   |
| 22143 | 208.118957519531 | 0.02 |   | 1 |   |
| ;     |                  |      |   |   |   |
| 22144 | 207.863235473633 | 0.01 |   | 1 |   |
| ;     |                  |      |   |   |   |
| 22145 | 207.924194335938 | 0.01 |   | 1 |   |
| ;     |                  |      |   |   |   |
| 22146 | 208.486618041992 | 0.03 |   | 1 |   |
| ;     |                  |      |   |   |   |
| 22147 | 208.694717407227 | 0.01 |   | 1 |   |
| ;     |                  |      |   |   |   |
| 22148 | 214.27815246582  | 0.02 | 1 |   | ; |
| 22149 | 214.099700927734 | 0.02 |   | 1 |   |
| ;     |                  |      |   |   |   |
| 22150 | 217.675964355469 | 0.09 |   | 1 |   |
| ;     |                  |      |   |   |   |
| 22151 | 209.367126464844 | 0.00 |   | 1 |   |
| ;     |                  |      |   |   |   |
| 22152 | 209.181869506836 | 0.02 |   | 1 |   |
| ;     |                  |      |   |   |   |
| 22153 | 192.950775146484 | 0.02 |   | 1 |   |
| ;     |                  |      |   |   |   |
| 22154 | 192.894882202148 | 0.05 |   | 1 |   |
| ;     |                  |      |   |   |   |
| 22155 | 217.870315551758 | 0.02 |   | 1 |   |
| ;     |                  |      |   |   |   |
| 22156 | 217.684921264648 | 0.01 |   | 1 |   |
| ;     |                  |      |   |   |   |
| 22157 | 217.607345581055 | 0.01 |   | 1 |   |
| ;     |                  |      |   |   |   |
| 22158 | 217.707122802734 | 0.00 |   | 1 |   |
| ;     |                  |      |   |   |   |
| 22159 | 210.910186767578 | 0.03 |   | 1 |   |
| ;     |                  |      |   |   |   |
| 22160 | 223.824493408203 | 0.01 |   | 1 |   |
| ;     |                  |      |   |   |   |
| 22161 | 223.814270019531 | 0.02 |   | 1 |   |
| ;     |                  |      |   |   |   |
| 22162 | 222.976898193359 | 0.00 |   | 1 |   |
| ;     |                  |      |   |   |   |
| 22163 | 208.139282226562 | 0.04 |   | 1 |   |
| ;     |                  |      |   |   |   |
| 22164 | 208.124145507813 | 0.00 |   | 1 |   |
| ;     |                  |      |   |   |   |
| 22165 | 228.17805480957  | 0.08 | 1 |   | ; |
| 22166 | 228.430160522461 | 0.04 |   | 1 |   |
| ;     |                  |      |   |   |   |
| 22167 | 228.426284790039 | 0.02 |   | 1 |   |
| ;     |                  |      |   |   |   |
| 22168 | 228.792739868164 | 0.06 |   | 1 |   |

```

;
22169      198.640411376953      0.02      1
;
22170      211.464492797852      0.01      1
;
22171      210.930435180664      0.00      1
;
22172      200      0.01      1      ;
22173      200      0.00      1      ;
22174      200      0.04      1      ;
22175      220      0.00      1      ;
22176      220      0.03      1      ;
22177      203.590072631836      0.00      1
;
22178      201.263397216797      0.01      1
;
22179      200.023986816406      0.03      1
;
22180      200.044036865234      0.03      1
;
22181      224.320571899414      0.00      1
;
22182      224.318756103516      0.00      1
;
22183      224.343414306641      0.00      1
;
22184      224.3525390625 0.01      1      ;
22185      224.265502929688      0.00      1
;
22186      224.245590209961      0.00      1
;
22187      224.262847900391      0.00      1
;
22188      224.243011474609      0.01      1
;
22189      221.996398925781      0.00      1
;
22190      221.991439819336      0.00      1
;
22191      224.219360351563      0.00      1
;
22192      224.214218139648      0.00      1
;
22193      202.273727416992      0.00      1
;
22194      202.26203918457 0.00      1      ;
22195      231.199462890625      0.02      1
;
22196      231.218475341797      0.06      1
;

```

|       |                      |      |   |   |
|-------|----------------------|------|---|---|
| 22197 | 235.523040771484     | 0.02 | 1 |   |
| ;     |                      |      |   |   |
| 22198 | 235.508163452148     | 0.05 | 1 |   |
| ;     |                      |      |   |   |
| 22199 | 235.536727905273     | 0.02 | 1 |   |
| ;     |                      |      |   |   |
| 22200 | 235.84358215332 0.04 |      | 1 | ; |
| 22201 | 235.857543945313     | 0.03 | 1 |   |
| ;     |                      |      |   |   |
| 22202 | 236.369750976563     | 0.02 | 1 |   |
| ;     |                      |      |   |   |
| 22203 | 236.385375976563     | 0.01 | 1 |   |
| ;     |                      |      |   |   |
| 22204 | 236.293792724609     | 0.02 | 1 |   |
| ;     |                      |      |   |   |
| 22205 | 236.277420043945     | 0.01 | 1 |   |
| ;     |                      |      |   |   |
| 22206 | 234.274688720703     | 0.01 | 1 |   |
| ;     |                      |      |   |   |
| 22207 | 234.294052124023     | 0.02 | 1 |   |
| ;     |                      |      |   |   |
| 22208 | 233.962707519531     | 0.03 | 1 |   |
| ;     |                      |      |   |   |
| 22209 | 231.264221191406     | 0.02 | 1 |   |
| ;     |                      |      |   |   |
| 22210 | 230.695877075195     | 0.03 | 1 |   |
| ;     |                      |      |   |   |
| 22211 | 230.709259033203     | 0.02 | 1 |   |
| ;     |                      |      |   |   |
| 22212 | 220.980209350586     | 0.00 | 1 |   |
| ;     |                      |      |   |   |
| 22213 | 220.983200073242     | 0.16 | 1 |   |
| ;     |                      |      |   |   |
| 22214 | 219.645034790039     | 0.01 | 1 |   |
| ;     |                      |      |   |   |
| 22215 | 229.944549560547     | 0.01 | 1 |   |
| ;     |                      |      |   |   |
| 22216 | 229.96354675293 0.02 |      | 1 | ; |
| 22217 | 229.651062011719     | 0.01 | 1 |   |
| ;     |                      |      |   |   |
| 22218 | 229.670104980469     | 0.00 | 1 |   |
| ;     |                      |      |   |   |
| 22219 | 228.477157592773     | 0.01 | 1 |   |
| ;     |                      |      |   |   |
| 22220 | 228.496246337891     | 0.01 | 1 |   |
| ;     |                      |      |   |   |
| 22221 | 228.762008666992     | 0.01 | 1 |   |
| ;     |                      |      |   |   |
| 22222 | 228.78108215332 0.02 |      | 1 | ; |
| 22223 | 228.997207641602     | 0.00 | 1 |   |

|       |                  |      |   |   |   |
|-------|------------------|------|---|---|---|
| ;     |                  |      |   |   |   |
| 22224 | 228.978118896484 | 0.00 |   | 1 |   |
| ;     |                  |      |   |   |   |
| 22225 | 228.979949951172 | 0.00 |   | 1 |   |
| ;     |                  |      |   |   |   |
| 22226 | 229.28205871582  | 0.01 | 1 |   | ; |
| 22227 | 229.301132202148 | 0.02 |   | 1 |   |
| ;     |                  |      |   |   |   |
| 22228 | 227.864303588867 | 0.01 |   | 1 |   |
| ;     |                  |      |   |   |   |
| 22229 | 227.883392333984 | 0.02 |   | 1 |   |
| ;     |                  |      |   |   |   |
| 22230 | 229.366973876953 | 0.02 |   | 1 |   |
| ;     |                  |      |   |   |   |
| 22231 | 229.239791870117 | 0.01 |   | 1 |   |
| ;     |                  |      |   |   |   |
| 22232 | 194.100708007813 | 0.02 |   | 1 |   |
| ;     |                  |      |   |   |   |
| 22233 | 193.692031860352 | 0.00 |   | 1 |   |
| ;     |                  |      |   |   |   |
| 22234 | 195.164978027344 | 0.04 |   | 1 |   |
| ;     |                  |      |   |   |   |
| 22235 | 196.17106628418  | 0.02 | 1 |   | ; |
| 22236 | 204.818176269531 | 0.02 |   | 1 |   |
| ;     |                  |      |   |   |   |
| 22237 | 204.898361206055 | 0.02 |   | 1 |   |
| ;     |                  |      |   |   |   |
| 22238 | 211.068084716797 | 0.35 |   | 1 |   |
| ;     |                  |      |   |   |   |
| 22239 | 211.456176757813 | 0.01 |   | 1 |   |
| ;     |                  |      |   |   |   |
| 22240 | 212.144958496094 | 0.01 |   | 1 |   |
| ;     |                  |      |   |   |   |
| 22241 | 212.558349609375 | 0.00 |   | 1 |   |
| ;     |                  |      |   |   |   |
| 22242 | 212.558486938477 | 0.00 |   | 1 |   |
| ;     |                  |      |   |   |   |
| 22243 | 212.316650390625 | 0.01 |   | 1 |   |
| ;     |                  |      |   |   |   |
| 22244 | 212.544921875    | 0.00 | 1 |   | ; |
| 22245 | 211.599304199219 | 0.01 |   | 1 |   |
| ;     |                  |      |   |   |   |
| 22246 | 213.268341064453 | 0.13 |   | 1 |   |
| ;     |                  |      |   |   |   |
| 22247 | 201.510025024414 | 0.10 |   | 1 |   |
| ;     |                  |      |   |   |   |
| 22248 | 200.867919921875 | 0.04 |   | 1 |   |
| ;     |                  |      |   |   |   |
| 22249 | 202.258056640625 | 0.01 |   | 1 |   |
| ;     |                  |      |   |   |   |

|       |                  |      |   |   |
|-------|------------------|------|---|---|
| 22250 | 202.810394287109 | 0.01 | 1 |   |
| ;     |                  |      |   |   |
| 22251 | 201.173217773438 | 0.00 | 1 |   |
| ;     |                  |      |   |   |
| 22252 | 201.324401855469 | 0.06 | 1 |   |
| ;     |                  |      |   |   |
| 22253 | 205.646697998047 | 0.11 | 1 |   |
| ;     |                  |      |   |   |
| 22254 | 205.210571289063 | 0.01 | 1 |   |
| ;     |                  |      |   |   |
| 22255 | 205.564178466797 | 0.01 | 1 |   |
| ;     |                  |      |   |   |
| 22256 | 218.380859375    | 0.01 | 1 | ; |
| 22257 | 228.165328979492 | 0.00 | 1 |   |
| ;     |                  |      |   |   |
| 22258 | 227.604766845703 | 0.00 | 1 |   |
| ;     |                  |      |   |   |
| 22259 | 228.116470336914 | 0.01 | 1 |   |
| ;     |                  |      |   |   |
| 22260 | 228.236465454102 | 0.00 | 1 |   |
| ;     |                  |      |   |   |
| 22261 | 229.689666748047 | 0.03 | 1 |   |
| ;     |                  |      |   |   |
| 22262 | 229.696212768555 | 0.02 | 1 |   |
| ;     |                  |      |   |   |
| 22263 | 222.050216674805 | 0.00 | 1 |   |
| ;     |                  |      |   |   |
| 22264 | 229.452682495117 | 0.01 | 1 |   |
| ;     |                  |      |   |   |
| 22265 | 231.564590454102 | 0.03 | 1 |   |
| ;     |                  |      |   |   |
| 22266 | 206.76985168457  | 0.00 | 1 | ; |
| 22267 | 206.54460144043  | 0.00 | 1 | ; |
| 22268 | 228.884017944336 | 0.00 | 1 |   |
| ;     |                  |      |   |   |
| 22269 | 228.900482177734 | 0.05 | 1 |   |
| ;     |                  |      |   |   |
| 22270 | 228.867584228516 | 0.00 | 1 |   |
| ;     |                  |      |   |   |
| 22271 | 215.462005615234 | 0.01 | 1 |   |
| ;     |                  |      |   |   |
| 22272 | 215.475830078125 | 0.01 | 1 |   |
| ;     |                  |      |   |   |
| 22273 | 215.232635498047 | 0.02 | 1 |   |
| ;     |                  |      |   |   |
| 22274 | 216.158554077148 | 0.01 | 1 |   |
| ;     |                  |      |   |   |
| 22275 | 215.8046875      | 0.02 | 1 | ; |
| 22276 | 215.810928344727 | 0.01 | 1 |   |
| ;     |                  |      |   |   |

|       |                  |      |   |   |
|-------|------------------|------|---|---|
| 22277 | 212.521957397461 | 0.12 | 1 |   |
| ;     |                  |      |   |   |
| 22278 | 212.528305053711 | 0.00 | 1 |   |
| ;     |                  |      |   |   |
| 22279 | 212.69287109375  | 0.02 | 1 | ; |
| 22280 | 212.679214477539 | 0.01 | 1 |   |
| ;     |                  |      |   |   |
| 22281 | 212.584106445313 | 0.04 | 1 |   |
| ;     |                  |      |   |   |
| 22282 | 212.576080322266 | 0.00 | 1 |   |
| ;     |                  |      |   |   |
| 22283 | 222.030715942383 | 0.00 | 1 |   |
| ;     |                  |      |   |   |
| 22284 | 219.294998168945 | 0.02 | 1 |   |
| ;     |                  |      |   |   |
| 22285 | 218.847366333008 | 0.01 | 1 |   |
| ;     |                  |      |   |   |
| 22286 | 217.694030761719 | 0.03 | 1 |   |
| ;     |                  |      |   |   |
| 22287 | 201.842269897461 | 0.02 | 1 |   |
| ;     |                  |      |   |   |
| 22288 | 201.007202148438 | 0.29 | 1 |   |
| ;     |                  |      |   |   |
| 22289 | 204.858184814453 | 0.01 | 1 |   |
| ;     |                  |      |   |   |
| 22290 | 204.27001953125  | 0.01 | 1 | ; |
| 22291 | 202.776748657227 | 0.06 | 1 |   |
| ;     |                  |      |   |   |
| 22292 | 204.14111328125  | 0.02 | 1 | ; |
| 22293 | 204.176681518555 | 0.01 | 1 |   |
| ;     |                  |      |   |   |
| 22294 | 194.591369628906 | 0.01 | 1 |   |
| ;     |                  |      |   |   |
| 22295 | 194.79704284668  | 0.05 | 1 | ; |
| 22296 | 204.016632080078 | 0.07 | 1 |   |
| ;     |                  |      |   |   |
| 22297 | 203.67057800293  | 0.03 | 1 | ; |
| 22298 | 215.855819702148 | 0.02 | 1 |   |
| ;     |                  |      |   |   |
| 22299 | 205              | 0.04 | 1 | ; |
| 22300 | 205.548141479492 | 0.02 | 1 |   |
| ;     |                  |      |   |   |
| 22301 | 191.720520019531 | 0.02 | 1 |   |
| ;     |                  |      |   |   |
| 22302 | 191.381881713867 | 0.01 | 1 |   |
| ;     |                  |      |   |   |
| 22303 | 204.385391235352 | 0.50 | 1 |   |
| ;     |                  |      |   |   |
| 22304 | 221.811294555664 | 0.02 | 1 |   |
| ;     |                  |      |   |   |

|       |                  |      |   |   |
|-------|------------------|------|---|---|
| 22305 | 201.192184448242 | 0.00 | 1 |   |
| ;     |                  |      |   |   |
| 22306 | 191.893447875977 | 0.04 | 1 |   |
| ;     |                  |      |   |   |
| 22307 | 191.691253662109 | 0.03 | 1 |   |
| ;     |                  |      |   |   |
| 22308 | 207.538986206055 | 0.00 | 1 |   |
| ;     |                  |      |   |   |
| 22309 | 207.097839355469 | 0.02 | 1 |   |
| ;     |                  |      |   |   |
| 22310 | 206.7861328125   | 0.02 | 1 | ; |
| 22311 | 207.32048034668  | 0.02 | 1 | ; |
| 22312 | 206.518951416016 | 0.02 | 1 |   |
| ;     |                  |      |   |   |
| 22313 | 206.295867919922 | 0.02 | 1 |   |
| ;     |                  |      |   |   |
| 22314 | 207.951049804688 | 0.00 | 1 |   |
| ;     |                  |      |   |   |
| 22315 | 208.119430541992 | 0.04 | 1 |   |
| ;     |                  |      |   |   |
| 22316 | 219.499862670898 | 0.01 | 1 |   |
| ;     |                  |      |   |   |
| 22317 | 218.200469970703 | 0.19 | 1 |   |
| ;     |                  |      |   |   |
| 22318 | 197.801132202148 | 0.01 | 1 |   |
| ;     |                  |      |   |   |
| 22319 | 199.750823974609 | 0.00 | 1 |   |
| ;     |                  |      |   |   |
| 22320 | 199.713104248047 | 0.00 | 1 |   |
| ;     |                  |      |   |   |
| 22321 | 195.421127319336 | 0.00 | 1 |   |
| ;     |                  |      |   |   |
| 22322 | 195.647308349609 | 0.01 | 1 |   |
| ;     |                  |      |   |   |
| 22323 | 214.670501708984 | 0.00 | 1 |   |
| ;     |                  |      |   |   |
| 22324 | 214.598220825195 | 0.00 | 1 |   |
| ;     |                  |      |   |   |
| 22325 | 214.550537109375 | 0.00 | 1 |   |
| ;     |                  |      |   |   |
| 22326 | 216.777496337891 | 0.05 | 1 |   |
| ;     |                  |      |   |   |
| 22327 | 219.014999389648 | 0.09 | 1 |   |
| ;     |                  |      |   |   |
| 22328 | 219.238327026367 | 0.01 | 1 |   |
| ;     |                  |      |   |   |
| 22329 | 195.665176391602 | 0.02 | 1 |   |
| ;     |                  |      |   |   |
| 22330 | 230.899536132813 | 0.01 | 1 |   |
| ;     |                  |      |   |   |



|       |                      |      |   |  |
|-------|----------------------|------|---|--|
| 22331 | 217.42041015625 0.04 | 1    |   |  |
| 22332 | 207.428421020508     | 0.00 | 1 |  |
| ;     |                      |      |   |  |
| 22333 | 205.150131225586     | 0.00 | 1 |  |
| ;     |                      |      |   |  |
| 22334 | 205.161514282227     | 0.04 | 1 |  |
| ;     |                      |      |   |  |
| 22335 | 226.701812744141     | 0.01 | 1 |  |
| ;     |                      |      |   |  |
| 22336 | 205.722274780273     | 0.02 | 1 |  |
| ;     |                      |      |   |  |
| 22337 | 228.567611694336     | 0.02 | 1 |  |
| ;     |                      |      |   |  |
| 22338 | 228.575561523438     | 0.03 | 1 |  |
| ;     |                      |      |   |  |
| 22339 | 230.516784667969     | 0.02 | 1 |  |
| ;     |                      |      |   |  |
| 22340 | 230.522323608398     | 0.01 | 1 |  |
| ;     |                      |      |   |  |
| 22341 | 222.555404663086     | 0.18 | 1 |  |
| ;     |                      |      |   |  |
| 22342 | 222.551712036133     | 0.00 | 1 |  |
| ;     |                      |      |   |  |
| 22343 | 221.820404052734     | 0.02 | 1 |  |
| ;     |                      |      |   |  |
| 22344 | 208.721786499023     | 0.02 | 1 |  |
| ;     |                      |      |   |  |
| 22345 | 209.711486816406     | 0.01 | 1 |  |
| ;     |                      |      |   |  |
| 22346 | 215.467864990234     | 0.01 | 1 |  |
| ;     |                      |      |   |  |
| 22347 | 214.083877563477     | 0.01 | 1 |  |
| ;     |                      |      |   |  |
| 22348 | 213.774230957031     | 0.01 | 1 |  |
| ;     |                      |      |   |  |
| 22349 | 214.689544677734     | 0.02 | 1 |  |
| ;     |                      |      |   |  |
| 22350 | 214.461196899414     | 0.02 | 1 |  |
| ;     |                      |      |   |  |
| 22351 | 214.435852050781     | 0.02 | 1 |  |
| ;     |                      |      |   |  |
| 22352 | 214.254333496094     | 0.02 | 1 |  |
| ;     |                      |      |   |  |
| 22353 | 194.097137451172     | 0.04 | 1 |  |
| ;     |                      |      |   |  |
| 22354 | 195.702453613281     | 0.03 | 1 |  |
| ;     |                      |      |   |  |
| 22355 | 190.944030761719     | 0.02 | 1 |  |
| ;     |                      |      |   |  |
| 22356 | 225.904052734375     | 0.07 | 1 |  |

|       |                  |      |   |   |   |
|-------|------------------|------|---|---|---|
| ;     |                  |      |   |   |   |
| 22357 | 227.016632080078 | 0.04 |   | 1 |   |
| ;     |                  |      |   |   |   |
| 22358 | 226.8369140625   | 0.06 | 1 |   | ; |
| 22359 | 229.016296386719 | 0.01 |   | 1 |   |
| ;     |                  |      |   |   |   |
| 22360 | 228.786209106445 | 0.01 |   | 1 |   |
| ;     |                  |      |   |   |   |
| 22361 | 228.494750976563 | 0.01 |   | 1 |   |
| ;     |                  |      |   |   |   |
| 22362 | 208.820236206055 | 0.03 |   | 1 |   |
| ;     |                  |      |   |   |   |
| 22363 | 201.223724365234 | 0.07 |   | 1 |   |
| ;     |                  |      |   |   |   |
| 22364 | 201.651504516602 | 0.03 |   | 1 |   |
| ;     |                  |      |   |   |   |
| 22365 | 229.39762878418  | 0.00 | 1 |   | ; |
| 22366 | 200              | 0.03 | 1 |   | ; |
| 22367 | 234.550155639648 | 0.02 |   | 1 |   |
| ;     |                  |      |   |   |   |
| 22368 | 218.852279663086 | 0.04 |   | 1 |   |
| ;     |                  |      |   |   |   |
| 22369 | 205.627670288086 | 0.00 |   | 1 |   |
| ;     |                  |      |   |   |   |
| 22370 | 233.539047241211 | 0.05 |   | 1 |   |
| ;     |                  |      |   |   |   |
| 22371 | 233.665100097656 | 0.05 |   | 1 |   |
| ;     |                  |      |   |   |   |
| 22372 | 202.931838989258 | 0.03 |   | 1 |   |
| ;     |                  |      |   |   |   |
| 22373 | 203.008438110352 | 0.00 |   | 1 |   |
| ;     |                  |      |   |   |   |
| 22374 | 203.110427856445 | 0.03 |   | 1 |   |
| ;     |                  |      |   |   |   |
| 22375 | 202.614028930664 | 0.01 |   | 1 |   |
| ;     |                  |      |   |   |   |
| 22376 | 216.714126586914 | 0.01 |   | 1 |   |
| ;     |                  |      |   |   |   |
| 22377 | 216.821334838867 | 0.01 |   | 1 |   |
| ;     |                  |      |   |   |   |
| 22378 | 217.068984985352 | 0.03 |   | 1 |   |
| ;     |                  |      |   |   |   |
| 22379 | 203.635269165039 | 0.13 |   | 1 |   |
| ;     |                  |      |   |   |   |
| 22380 | 210.68928527832  | 0.02 | 1 |   | ; |
| 22381 | 228.737808227539 | 0.05 |   | 1 |   |
| ;     |                  |      |   |   |   |
| 22382 | 228.453857421875 | 0.02 |   | 1 |   |
| ;     |                  |      |   |   |   |
| 22383 | 202.428665161133 | 0.07 |   | 1 |   |

|       |                  |      |   |   |   |
|-------|------------------|------|---|---|---|
| ;     |                  |      |   |   |   |
| 22384 | 202.723129272461 | 0.01 |   | 1 |   |
| ;     |                  |      |   |   |   |
| 22385 | 200.302047729492 | 0.00 |   | 1 |   |
| ;     |                  |      |   |   |   |
| 22386 | 191.290832519531 | 0.02 |   | 1 |   |
| ;     |                  |      |   |   |   |
| 22387 | 236.434219360352 | 0.02 |   | 1 |   |
| ;     |                  |      |   |   |   |
| 22388 | 235.976913452148 | 0.05 |   | 1 |   |
| ;     |                  |      |   |   |   |
| 22389 | 231.816680908203 | 0.02 |   | 1 |   |
| ;     |                  |      |   |   |   |
| 22390 | 231.330093383789 | 0.02 |   | 1 |   |
| ;     |                  |      |   |   |   |
| 22391 | 231.223526000977 | 0.05 |   | 1 |   |
| ;     |                  |      |   |   |   |
| 22392 | 231.195205688477 | 0.03 |   | 1 |   |
| ;     |                  |      |   |   |   |
| 22393 | 213.254791259766 | 0.00 |   | 1 |   |
| ;     |                  |      |   |   |   |
| 22394 | 214.906036376953 | 0.02 |   | 1 |   |
| ;     |                  |      |   |   |   |
| 22395 | 215.1689453125   | 0.02 | 1 |   | ; |
| 22396 | 214.946258544922 | 0.02 |   | 1 |   |
| ;     |                  |      |   |   |   |
| 22397 | 229.301300048828 | 0.01 |   | 1 |   |
| ;     |                  |      |   |   |   |
| 22398 | 220.242630004883 | 0.00 |   | 1 |   |
| ;     |                  |      |   |   |   |
| 22399 | 214.186065673828 | 0.02 |   | 1 |   |
| ;     |                  |      |   |   |   |
| 22400 | 217.116683959961 | 0.04 |   | 1 |   |
| ;     |                  |      |   |   |   |
| 22401 | 203.741561889648 | 0.01 |   | 1 |   |
| ;     |                  |      |   |   |   |
| 22402 | 203.16716003418  | 0.02 | 1 |   | ; |
| 22403 | 203.061798095703 | 0.01 |   | 1 |   |
| ;     |                  |      |   |   |   |
| 22404 | 223.01969909668  | 0.02 | 1 |   | ; |
| 22405 | 226.799621582031 | 0.01 |   | 1 |   |
| ;     |                  |      |   |   |   |
| 22406 | 216.658843994141 | 0.01 |   | 1 |   |
| ;     |                  |      |   |   |   |
| 22407 | 212.360336303711 | 0.00 |   | 1 |   |
| ;     |                  |      |   |   |   |
| 22408 | 220.291854858398 | 0.03 |   | 1 |   |
| ;     |                  |      |   |   |   |
| 22409 | 220.258285522461 | 0.03 |   | 1 |   |
| ;     |                  |      |   |   |   |

|       |                  |      |   |   |  |   |
|-------|------------------|------|---|---|--|---|
| 22410 | 200              | 0.01 | 1 |   |  | ; |
| 22411 | 200              | 0.02 | 1 |   |  | ; |
| 22412 | 200              | 0.00 | 1 |   |  | ; |
| 22413 | 200              | 0.00 | 1 |   |  | ; |
| 22414 | 206.096160888672 | 0.01 |   | 1 |  |   |
| ;     |                  |      |   |   |  |   |
| 22415 | 219.049942016602 | 0.01 |   | 1 |  |   |
| ;     |                  |      |   |   |  |   |
| 22416 | 219.209213256836 | 0.01 |   | 1 |  |   |
| ;     |                  |      |   |   |  |   |
| 22417 | 219.59342956543  | 0.02 | 1 |   |  | ; |
| 22418 | 219.27099609375  | 0.04 | 1 |   |  | ; |
| 22419 | 218.855056762695 | 0.04 |   | 1 |  |   |
| ;     |                  |      |   |   |  |   |
| 22420 | 219.625823974609 | 0.02 |   | 1 |  |   |
| ;     |                  |      |   |   |  |   |
| 22421 | 218.262145996094 | 0.00 |   | 1 |  |   |
| ;     |                  |      |   |   |  |   |
| 22422 | 218.466400146484 | 0.00 |   | 1 |  |   |
| ;     |                  |      |   |   |  |   |
| 22423 | 218.695465087891 | 0.01 |   | 1 |  |   |
| ;     |                  |      |   |   |  |   |
| 22424 | 218.276077270508 | 0.01 |   | 1 |  |   |
| ;     |                  |      |   |   |  |   |
| 22425 | 217.432083129883 | 0.05 |   | 1 |  |   |
| ;     |                  |      |   |   |  |   |
| 22426 | 231.43962097168  | 0.02 | 1 |   |  | ; |
| 22427 | 201.008895874023 | 0.02 |   | 1 |  |   |
| ;     |                  |      |   |   |  |   |
| 22428 | 233.211196899414 | 0.02 |   | 1 |  |   |
| ;     |                  |      |   |   |  |   |
| 22429 | 233.343002319336 | 0.02 |   | 1 |  |   |
| ;     |                  |      |   |   |  |   |
| 22430 | 196.387710571289 | 0.01 |   | 1 |  |   |
| ;     |                  |      |   |   |  |   |
| 22431 | 195.79866027832  | 0.01 | 1 |   |  | ; |
| 22432 | 195.96614074707  | 0.01 | 1 |   |  | ; |
| 22433 | 219.93701171875  | 0.01 | 1 |   |  | ; |
| 22434 | 192.274688720703 | 0.01 |   | 1 |  |   |
| ;     |                  |      |   |   |  |   |
| 22435 | 192.335708618164 | 0.04 |   | 1 |  |   |
| ;     |                  |      |   |   |  |   |
| 22436 | 192.431259155273 | 0.03 |   | 1 |  |   |
| ;     |                  |      |   |   |  |   |
| 22437 | 219.913162231445 | 0.06 |   | 1 |  |   |
| ;     |                  |      |   |   |  |   |
| 22438 | 219.915725708008 | 0.03 |   | 1 |  |   |
| ;     |                  |      |   |   |  |   |
| 22439 | 216.398956298828 | 0.02 |   | 1 |  |   |
| ;     |                  |      |   |   |  |   |

|       |                  |      |   |   |
|-------|------------------|------|---|---|
| 22440 | 216.710296630859 | 0.02 | 1 |   |
| ;     |                  |      |   |   |
| 22441 | 216.717880249023 | 0.00 | 1 |   |
| ;     |                  |      |   |   |
| 22442 | 209.406219482422 | 0.01 | 1 |   |
| ;     |                  |      |   |   |
| 22443 | 201.347183227539 | 0.00 | 1 |   |
| ;     |                  |      |   |   |
| 22444 | 201.369888305664 | 0.09 | 1 |   |
| ;     |                  |      |   |   |
| 22445 | 201.32421875     | 0.00 | 1 | ; |
| 22446 | 201.373550415039 | 0.00 | 1 |   |
| ;     |                  |      |   |   |
| 22447 | 236.449630737305 | 0.00 | 1 |   |
| ;     |                  |      |   |   |
| 22448 | 236.475692749023 | 0.00 | 1 |   |
| ;     |                  |      |   |   |
| 22449 | 236.444229125977 | 0.00 | 1 |   |
| ;     |                  |      |   |   |
| 22450 | 193.241790771484 | 0.00 | 1 |   |
| ;     |                  |      |   |   |
| 22451 | 193.240173339844 | 0.00 | 1 |   |
| ;     |                  |      |   |   |
| 22452 | 191.520690917969 | 0.01 | 1 |   |
| ;     |                  |      |   |   |
| 22453 | 191.532180786133 | 0.02 | 1 |   |
| ;     |                  |      |   |   |
| 22454 | 191.922241210938 | 0.02 | 1 |   |
| ;     |                  |      |   |   |
| 22455 | 191.927871704102 | 0.05 | 1 |   |
| ;     |                  |      |   |   |
| 22456 | 214.113555908203 | 0.03 | 1 |   |
| ;     |                  |      |   |   |
| 22457 | 215.750030517578 | 0.03 | 1 |   |
| ;     |                  |      |   |   |
| 22458 | 216.909606933594 | 0.01 | 1 |   |
| ;     |                  |      |   |   |
| 22459 | 217.134033203125 | 0.03 | 1 |   |
| ;     |                  |      |   |   |
| 22460 | 220              | 0.01 | 1 | ; |
| 22461 | 217.753753662109 | 0.05 | 1 |   |
| ;     |                  |      |   |   |
| 22462 | 196.731658935547 | 0.02 | 1 |   |
| ;     |                  |      |   |   |
| 22463 | 196.923812866211 | 0.01 | 1 |   |
| ;     |                  |      |   |   |
| 22464 | 191.114318847656 | 0.16 | 1 |   |
| ;     |                  |      |   |   |
| 22465 | 191.292510986328 | 0.00 | 1 |   |
| ;     |                  |      |   |   |

|       |                  |      |   |   |
|-------|------------------|------|---|---|
| 22466 | 192.610977172852 | 0.02 | 1 |   |
| ;     |                  |      |   |   |
| 22467 | 202.953140258789 | 0.10 | 1 |   |
| ;     |                  |      |   |   |
| 22468 | 216.766235351563 | 0.03 | 1 |   |
| ;     |                  |      |   |   |
| 22469 | 217.065155029297 | 0.03 | 1 |   |
| ;     |                  |      |   |   |
| 22470 | 222.918533325195 | 0.02 | 1 |   |
| ;     |                  |      |   |   |
| 22471 | 223.370468139648 | 0.06 | 1 |   |
| ;     |                  |      |   |   |
| 22472 | 205.173233032227 | 0.01 | 1 |   |
| ;     |                  |      |   |   |
| 22473 | 200              | 0.00 | 1 | ; |
| 22474 | 200              | 0.00 | 1 | ; |
| 22475 | 218.968841552734 | 0.01 | 1 |   |
| ;     |                  |      |   |   |
| 22476 | 219.612106323242 | 0.05 | 1 |   |
| ;     |                  |      |   |   |
| 22477 | 235.675170898438 | 0.02 | 1 |   |
| ;     |                  |      |   |   |
| 22478 | 205.495544433594 | 0.02 | 1 |   |
| ;     |                  |      |   |   |
| 22479 | 205.540832519531 | 0.02 | 1 |   |
| ;     |                  |      |   |   |
| 22480 | 205.540237426758 | 0.00 | 1 |   |
| ;     |                  |      |   |   |
| 22481 | 221.204376220703 | 1.16 | 1 |   |
| ;     |                  |      |   |   |
| 22482 | 221.26676940918  | 0.00 | 1 | ; |
| 22483 | 224.411666870117 | 0.00 | 1 |   |
| ;     |                  |      |   |   |
| 22484 | 224.090744018555 | 0.01 | 1 |   |
| ;     |                  |      |   |   |
| 22485 | 218.46533203125  | 0.06 | 1 | ; |
| 22486 | 227.076049804688 | 0.05 | 1 |   |
| ;     |                  |      |   |   |
| 22487 | 227.236389160156 | 0.06 | 1 |   |
| ;     |                  |      |   |   |
| 22488 | 229.593002319336 | 0.01 | 1 |   |
| ;     |                  |      |   |   |
| 22489 | 192.090362548828 | 0.00 | 1 |   |
| ;     |                  |      |   |   |
| 22490 | 190.089004516602 | 0.00 | 1 |   |
| ;     |                  |      |   |   |
| 22491 | 190.416366577148 | 0.00 | 1 |   |
| ;     |                  |      |   |   |
| 22492 | 208.027893066406 | 0.02 | 1 |   |
| ;     |                  |      |   |   |

|       |                  |      |   |   |
|-------|------------------|------|---|---|
| 22493 | 207.837738037109 | 0.02 | 1 |   |
| ;     |                  |      |   |   |
| 22494 | 207.522598266602 | 0.02 | 1 |   |
| ;     |                  |      |   |   |
| 22495 | 206.954742431641 | 0.02 | 1 |   |
| ;     |                  |      |   |   |
| 22496 | 206.661468505859 | 0.02 | 1 |   |
| ;     |                  |      |   |   |
| 22497 | 206.410751342773 | 0.02 | 1 |   |
| ;     |                  |      |   |   |
| 22498 | 191.202194213867 | 0.00 | 1 |   |
| ;     |                  |      |   |   |
| 22499 | 216.557174682617 | 0.00 | 1 |   |
| ;     |                  |      |   |   |
| 22500 | 191.506729125977 | 0.00 | 1 |   |
| ;     |                  |      |   |   |
| 22501 | 216.131744384766 | 0.00 | 1 |   |
| ;     |                  |      |   |   |
| 22502 | 216.160247802734 | 0.01 | 1 |   |
| ;     |                  |      |   |   |
| 22503 | 205.32502746582  | 0.00 | 1 |   |
| 22504 | 222.585556030273 | 0.06 | 1 | ; |
| ;     |                  |      |   |   |
| 22505 | 222.590942382813 | 0.03 | 1 |   |
| ;     |                  |      |   |   |
| 22506 | 236.038650512695 | 0.02 | 1 |   |
| ;     |                  |      |   |   |
| 22507 | 215.240219116211 | 0.01 | 1 |   |
| ;     |                  |      |   |   |
| 22508 | 212.593185424805 | 0.01 | 1 |   |
| ;     |                  |      |   |   |
| 22509 | 212.354019165039 | 0.03 | 1 |   |
| ;     |                  |      |   |   |
| 22510 | 200              | 0.00 | 1 | ; |
| 22511 | 200              | 0.01 | 1 | ; |
| 22512 | 200              | 0.01 | 1 | ; |
| 22513 | 200              | 0.01 | 1 | ; |
| 22514 | 200              | 0.05 | 1 | ; |
| 22515 | 204.377227783203 | 0.02 | 1 |   |
| ;     |                  |      |   |   |
| 22516 | 204.362121582031 | 0.01 | 1 |   |
| ;     |                  |      |   |   |
| 22517 | 202.756286621094 | 0.01 | 1 |   |
| ;     |                  |      |   |   |
| 22518 | 202.742980957031 | 0.01 | 1 |   |
| ;     |                  |      |   |   |
| 22519 | 202.769561767578 | 0.01 | 1 |   |
| ;     |                  |      |   |   |
| 22520 | 203.153137207031 | 0.01 | 1 |   |
| ;     |                  |      |   |   |

|       |                  |      |   |   |
|-------|------------------|------|---|---|
| 22521 | 209.244323730469 | 0.08 | 1 |   |
| ;     |                  |      |   |   |
| 22522 | 207.855697631836 | 0.05 | 1 |   |
| ;     |                  |      |   |   |
| 22523 | 207.863800048828 | 0.00 | 1 |   |
| ;     |                  |      |   |   |
| 22524 | 207.848999023438 | 0.00 | 1 |   |
| ;     |                  |      |   |   |
| 22525 | 207.667892456055 | 0.14 | 1 |   |
| ;     |                  |      |   |   |
| 22526 | 207.660308837891 | 0.00 | 1 |   |
| ;     |                  |      |   |   |
| 22527 | 209.726272583008 | 0.01 | 1 |   |
| ;     |                  |      |   |   |
| 22528 | 209.736999511719 | 0.03 | 1 |   |
| ;     |                  |      |   |   |
| 22529 | 209.735565185547 | 0.00 | 1 |   |
| ;     |                  |      |   |   |
| 22530 | 208.811981201172 | 0.03 | 1 |   |
| ;     |                  |      |   |   |
| 22531 | 208.813171386719 | 0.00 | 1 |   |
| ;     |                  |      |   |   |
| 22532 | 197.580917358398 | 0.02 | 1 |   |
| ;     |                  |      |   |   |
| 22533 | 197.59521484375  | 0.02 | 1 |   |
| 22534 | 222.561080932617 | 0.07 | 1 | ; |
| ;     |                  |      |   |   |
| 22535 | 230.208587646484 | 0.00 | 1 |   |
| ;     |                  |      |   |   |
| 22536 | 230.229125976563 | 0.00 | 1 |   |
| ;     |                  |      |   |   |
| 22537 | 233.73991394043  | 0.00 | 1 |   |
| 22538 | 233.717498779297 | 0.00 | 1 | ; |
| ;     |                  |      |   |   |
| 22539 | 231.682907104492 | 0.00 | 1 |   |
| ;     |                  |      |   |   |
| 22540 | 231.699188232422 | 0.01 | 1 |   |
| ;     |                  |      |   |   |
| 22541 | 228.746765136719 | 0.01 | 1 |   |
| ;     |                  |      |   |   |
| 22542 | 195.988174438477 | 0.01 | 1 |   |
| ;     |                  |      |   |   |
| 22543 | 221.349197387695 | 0.00 | 1 |   |
| ;     |                  |      |   |   |
| 22544 | 206.03271484375  | 0.00 | 1 |   |
| 22545 | 206.029205322266 | 0.01 | 1 | ; |
| ;     |                  |      |   |   |
| 22546 | 220.994323730469 | 0.01 | 1 |   |
| ;     |                  |      |   |   |
| 22547 | 221.009246826172 | 0.01 | 1 |   |



|       |                  |      |   |   |
|-------|------------------|------|---|---|
| ;     |                  |      |   |   |
| 22548 | 219.067962646484 | 0.00 | 1 |   |
| ;     |                  |      |   |   |
| 22549 | 219.076522827148 | 0.00 | 1 |   |
| ;     |                  |      |   |   |
| 22550 | 213.282943725586 | 0.00 | 1 |   |
| ;     |                  |      |   |   |
| 22551 | 213.283126831055 | 0.03 | 1 |   |
| ;     |                  |      |   |   |
| 22552 | 204.174926757813 | 0.01 | 1 |   |
| ;     |                  |      |   |   |
| 22553 | 204.161636352539 | 0.01 | 1 |   |
| ;     |                  |      |   |   |
| 22554 | 227.867584228516 | 0.01 | 1 |   |
| ;     |                  |      |   |   |
| 22555 | 229.989959716797 | 0.02 | 1 |   |
| ;     |                  |      |   |   |
| 22556 | 229.996185302734 | 0.01 | 1 |   |
| ;     |                  |      |   |   |
| 22557 | 230.30436706543  | 0.01 | 1 |   |
| 22558 | 230.612396240234 | 0.02 | 1 | ; |
| ;     |                  |      |   |   |
| 22559 | 230.918380737305 | 0.01 | 1 |   |
| ;     |                  |      |   |   |
| 22560 | 231.180450439453 | 0.00 | 1 |   |
| ;     |                  |      |   |   |
| 22561 | 212.884033203125 | 0.04 | 1 |   |
| ;     |                  |      |   |   |
| 22562 | 212.876846313477 | 0.01 | 1 |   |
| ;     |                  |      |   |   |
| 22563 | 207.22819519043  | 0.02 | 1 |   |
| 22564 | 207.252288818359 | 0.00 | 1 | ; |
| ;     |                  |      |   |   |
| 22565 | 207.239105224609 | 0.02 | 1 |   |
| ;     |                  |      |   |   |
| 22566 | 207.203811645508 | 0.02 | 1 |   |
| ;     |                  |      |   |   |
| 22567 | 207.937362670898 | 0.02 | 1 |   |
| ;     |                  |      |   |   |
| 22568 | 206.950973510742 | 0.06 | 1 |   |
| ;     |                  |      |   |   |
| 22569 | 206.934432983398 | 0.01 | 1 |   |
| ;     |                  |      |   |   |
| 22570 | 219.041961669922 | 0.00 | 1 |   |
| ;     |                  |      |   |   |
| 22571 | 218.98908996582  | 0.01 | 1 |   |
| 22572 | 208.751342773438 | 0.03 | 1 | ; |
| ;     |                  |      |   |   |
| 22573 | 208.765518188477 | 0.03 | 1 |   |
| ;     |                  |      |   |   |

|       |                  |      |   |   |
|-------|------------------|------|---|---|
| 22574 | 208.737899780273 | 0.15 | 1 |   |
| ;     |                  |      |   |   |
| 22575 | 211.523696899414 | 0.00 | 1 |   |
| ;     |                  |      |   |   |
| 22576 | 211.534362792969 | 0.01 | 1 |   |
| ;     |                  |      |   |   |
| 22577 | 201.476776123047 | 0.00 | 1 |   |
| ;     |                  |      |   |   |
| 22578 | 201.468597412109 | 0.01 | 1 |   |
| ;     |                  |      |   |   |
| 22579 | 202.868225097656 | 0.02 | 1 |   |
| ;     |                  |      |   |   |
| 22580 | 202.863433837891 | 0.02 | 1 |   |
| ;     |                  |      |   |   |
| 22581 | 203.181411743164 | 0.01 | 1 |   |
| ;     |                  |      |   |   |
| 22582 | 202.680313110352 | 0.00 | 1 |   |
| ;     |                  |      |   |   |
| 22583 | 202.670913696289 | 0.01 | 1 |   |
| ;     |                  |      |   |   |
| 22584 | 202.799392700195 | 0.01 | 1 |   |
| ;     |                  |      |   |   |
| 22585 | 201.605331420898 | 0.00 | 1 |   |
| ;     |                  |      |   |   |
| 22586 | 201.619033813477 | 0.00 | 1 |   |
| ;     |                  |      |   |   |
| 22587 | 197.907485961914 | 0.02 | 1 |   |
| ;     |                  |      |   |   |
| 22588 | 197.910583496094 | 0.02 | 1 |   |
| ;     |                  |      |   |   |
| 22589 | 198.799102783203 | 0.01 | 1 |   |
| ;     |                  |      |   |   |
| 22590 | 198.80078125     | 0.01 | 1 |   |
| 22591 | 220.524810791016 | 0.02 | 1 | ; |
| ;     |                  |      |   |   |
| 22592 | 230.448883056641 | 0.01 | 1 |   |
| ;     |                  |      |   |   |
| 22593 | 231.445053100586 | 0.02 | 1 |   |
| ;     |                  |      |   |   |
| 22594 | 231.454467773438 | 0.03 | 1 |   |
| ;     |                  |      |   |   |
| 22595 | 230.709625244141 | 0.05 | 1 |   |
| ;     |                  |      |   |   |
| 22596 | 230.702728271484 | 0.03 | 1 |   |
| ;     |                  |      |   |   |
| 22597 | 231.666625976562 | 0.07 | 1 |   |
| ;     |                  |      |   |   |
| 22598 | 230.105926513672 | 0.01 | 1 |   |
| ;     |                  |      |   |   |
| 22599 | 230.110000610352 | 0.05 | 1 |   |

|       |                  |      |   |   |   |
|-------|------------------|------|---|---|---|
| ;     |                  |      |   |   |   |
| 22600 | 229.818374633789 | 0.00 |   | 1 |   |
| ;     |                  |      |   |   |   |
| 22601 | 229.54963684082  | 0.00 | 1 |   | ; |
| 22602 | 229.561645507813 | 0.00 |   | 1 |   |
| ;     |                  |      |   |   |   |
| 22603 | 208.281097412109 | 0.02 |   | 1 |   |
| ;     |                  |      |   |   |   |
| 22604 | 214.670944213867 | 0.00 |   | 1 |   |
| ;     |                  |      |   |   |   |
| 22605 | 219.267028808594 | 0.02 |   | 1 |   |
| ;     |                  |      |   |   |   |
| 22606 | 218.595809936523 | 0.01 |   | 1 |   |
| ;     |                  |      |   |   |   |
| 22607 | 219.819076538086 | 0.01 |   | 1 |   |
| ;     |                  |      |   |   |   |
| 22608 | 205.574996948242 | 0.01 |   | 1 |   |
| ;     |                  |      |   |   |   |
| 22609 | 205.333297729492 | 0.04 |   | 1 |   |
| ;     |                  |      |   |   |   |
| 22610 | 206.364562988281 | 0.05 |   | 1 |   |
| ;     |                  |      |   |   |   |
| 22611 | 206.814987182617 | 0.04 |   | 1 |   |
| ;     |                  |      |   |   |   |
| 22612 | 233.650680541992 | 0.00 |   | 1 |   |
| ;     |                  |      |   |   |   |
| 22613 | 234.260025024414 | 0.00 |   | 1 |   |
| ;     |                  |      |   |   |   |
| 22614 | 218.116577148437 | 0.06 |   | 1 |   |
| ;     |                  |      |   |   |   |
| 22615 | 192.807174682617 | 0.03 |   | 1 |   |
| ;     |                  |      |   |   |   |
| 22616 | 193.134231567383 | 0.03 |   | 1 |   |
| ;     |                  |      |   |   |   |
| 22617 | 220.25634765625  | 0.04 | 1 |   | ; |
| 22618 | 220.778182983398 | 0.04 |   | 1 |   |
| ;     |                  |      |   |   |   |
| 22619 | 219.150054931641 | 0.04 |   | 1 |   |
| ;     |                  |      |   |   |   |
| 22620 | 209.968521118164 | 0.00 |   | 1 |   |
| ;     |                  |      |   |   |   |
| 22621 | 210.678039550781 | 0.07 |   | 1 |   |
| ;     |                  |      |   |   |   |
| 22622 | 210.728805541992 | 0.01 |   | 1 |   |
| ;     |                  |      |   |   |   |
| 22623 | 236.125335693359 | 0.03 |   | 1 |   |
| ;     |                  |      |   |   |   |
| 22624 | 219.214752197266 | 0.01 |   | 1 |   |
| ;     |                  |      |   |   |   |
| 22625 | 205              | 0.00 | 1 |   | ; |

|       |                  |      |   |   |  |  |
|-------|------------------|------|---|---|--|--|
| 22626 | 204.88020324707  | 0.03 | 1 |   |  |  |
| 22627 | 233.021850585938 | 0.00 |   | 1 |  |  |
| ;     |                  |      |   |   |  |  |
| 22628 | 229.696670532227 | 0.02 |   | 1 |  |  |
| ;     |                  |      |   |   |  |  |
| 22629 | 228.613708496094 | 0.00 |   | 1 |  |  |
| ;     |                  |      |   |   |  |  |
| 22630 | 203.916168212891 | 0.06 |   | 1 |  |  |
| ;     |                  |      |   |   |  |  |
| 22631 | 204.268615722656 | 0.00 |   | 1 |  |  |
| ;     |                  |      |   |   |  |  |
| 22632 | 205              | 0.05 | 1 |   |  |  |
| 22633 | 215.628372192383 | 0.07 |   | 1 |  |  |
| ;     |                  |      |   |   |  |  |
| 22634 | 201.878936767578 | 0.00 |   | 1 |  |  |
| ;     |                  |      |   |   |  |  |
| 22635 | 201.754516601563 | 0.00 |   | 1 |  |  |
| ;     |                  |      |   |   |  |  |
| 22636 | 210.057708740234 | 0.06 |   | 1 |  |  |
| ;     |                  |      |   |   |  |  |
| 22637 | 200              | 0.05 | 1 |   |  |  |
| 22638 | 200.296646118164 | 0.06 |   | 1 |  |  |
| ;     |                  |      |   |   |  |  |
| 22639 | 207.164642333984 | 0.05 |   | 1 |  |  |
| ;     |                  |      |   |   |  |  |
| 22640 | 233.643371582031 | 0.04 |   | 1 |  |  |
| ;     |                  |      |   |   |  |  |
| 22641 | 232.470718383789 | 0.01 |   | 1 |  |  |
| ;     |                  |      |   |   |  |  |
| 22642 | 232.485504150391 | 0.02 |   | 1 |  |  |
| ;     |                  |      |   |   |  |  |
| 22643 | 233.179916381836 | 0.04 |   | 1 |  |  |
| ;     |                  |      |   |   |  |  |
| 22644 | 207.278076171875 | 0.02 |   | 1 |  |  |
| ;     |                  |      |   |   |  |  |
| 22645 | 192.168380737305 | 0.03 |   | 1 |  |  |
| ;     |                  |      |   |   |  |  |
| 22646 | 195.775665283203 | 0.02 |   | 1 |  |  |
| ;     |                  |      |   |   |  |  |
| 22647 | 222.055847167969 | 0.01 |   | 1 |  |  |
| ;     |                  |      |   |   |  |  |
| 22648 | 221.467407226563 | 0.01 |   | 1 |  |  |
| ;     |                  |      |   |   |  |  |
| 22649 | 222.044891357422 | 0.03 |   | 1 |  |  |
| ;     |                  |      |   |   |  |  |
| 22650 | 224.283477783203 | 0.00 |   | 1 |  |  |
| ;     |                  |      |   |   |  |  |
| 22651 | 206.616485595703 | 0.04 |   | 1 |  |  |
| ;     |                  |      |   |   |  |  |
| 22652 | 207.697463989258 | 0.10 |   | 1 |  |  |

|       |                  |      |   |   |
|-------|------------------|------|---|---|
| ;     |                  |      |   |   |
| 22653 | 201.635314941406 | 0.00 | 1 |   |
| ;     |                  |      |   |   |
| 22654 | 201.651153564453 | 0.02 | 1 |   |
| ;     |                  |      |   |   |
| 22655 | 219.615295410156 | 0.02 | 1 |   |
| ;     |                  |      |   |   |
| 22656 | 219.625823974609 | 0.01 | 1 |   |
| ;     |                  |      |   |   |
| 22657 | 219.845092773438 | 0.02 | 1 |   |
| ;     |                  |      |   |   |
| 22658 | 219.849411010742 | 0.01 | 1 |   |
| ;     |                  |      |   |   |
| 22659 | 219.781616210938 | 0.01 | 1 |   |
| ;     |                  |      |   |   |
| 22660 | 219.774490356445 | 0.02 | 1 |   |
| ;     |                  |      |   |   |
| 22661 | 219.058670043945 | 0.00 | 1 |   |
| ;     |                  |      |   |   |
| 22662 | 219.166854858398 | 0.00 | 1 |   |
| ;     |                  |      |   |   |
| 22663 | 219.812133789063 | 0.01 | 1 |   |
| ;     |                  |      |   |   |
| 22664 | 214.189208984375 | 0.06 | 1 |   |
| ;     |                  |      |   |   |
| 22665 | 214.196182250977 | 0.02 | 1 |   |
| ;     |                  |      |   |   |
| 22666 | 201.397216796875 | 0.04 | 1 |   |
| ;     |                  |      |   |   |
| 22667 | 201.48469543457  | 0.09 | 1 |   |
| 22668 | 203.740036010742 | 0.01 | 1 | ; |
| ;     |                  |      |   |   |
| 22669 | 204.444595336914 | 0.01 | 1 |   |
| ;     |                  |      |   |   |
| 22670 | 204.429458618164 | 0.01 | 1 |   |
| ;     |                  |      |   |   |
| 22671 | 202.186309814453 | 0.01 | 1 |   |
| ;     |                  |      |   |   |
| 22672 | 202.183944702148 | 0.01 | 1 |   |
| ;     |                  |      |   |   |
| 22673 | 200.692306518555 | 0.01 | 1 |   |
| ;     |                  |      |   |   |
| 22674 | 200.678619384766 | 0.01 | 1 |   |
| ;     |                  |      |   |   |
| 22675 | 199.276428222656 | 0.01 | 1 |   |
| ;     |                  |      |   |   |
| 22676 | 199.285842895508 | 0.00 | 1 |   |
| ;     |                  |      |   |   |
| 22677 | 202.754623413086 | 0.01 | 1 |   |
| ;     |                  |      |   |   |

|       |                      |      |   |   |
|-------|----------------------|------|---|---|
| 22678 | 207.657379150391     | 0.01 | 1 |   |
| ;     |                      |      |   |   |
| 22679 | 201.66813659668 0.00 |      | 1 | ; |
| 22680 | 201.682174682617     | 0.00 | 1 |   |
| ;     |                      |      |   |   |
| 22681 | 198.797760009766     | 0.01 | 1 |   |
| ;     |                      |      |   |   |
| 22682 | 232.763900756836     | 0.04 | 1 |   |
| ;     |                      |      |   |   |
| 22683 | 232.474426269531     | 0.04 | 1 |   |
| ;     |                      |      |   |   |
| 22684 | 225.311340332031     | 0.00 | 1 |   |
| ;     |                      |      |   |   |
| 22685 | 201.014312744141     | 0.00 | 1 |   |
| ;     |                      |      |   |   |
| 22686 | 203.674591064453     | 0.03 | 1 |   |
| ;     |                      |      |   |   |
| 22687 | 203.230163574219     | 0.13 | 1 |   |
| ;     |                      |      |   |   |
| 22688 | 220.289733886719     | 0.01 | 1 |   |
| ;     |                      |      |   |   |
| 22689 | 205.207138061523     | 0.02 | 1 |   |
| ;     |                      |      |   |   |
| 22690 | 193.214370727539     | 0.06 | 1 |   |
| ;     |                      |      |   |   |
| 22691 | 216.091720581055     | 0.02 | 1 |   |
| ;     |                      |      |   |   |
| 22692 | 216.073150634766     | 0.00 | 1 |   |
| ;     |                      |      |   |   |
| 22693 | 214.629043579102     | 0.01 | 1 |   |
| ;     |                      |      |   |   |
| 22694 | 204.263702392578     | 0.03 | 1 |   |
| ;     |                      |      |   |   |
| 22695 | 204.223846435547     | 0.00 | 1 |   |
| ;     |                      |      |   |   |
| 22696 | 204.211013793945     | 0.01 | 1 |   |
| ;     |                      |      |   |   |
| 22697 | 204.517913818359     | 0.02 | 1 |   |
| ;     |                      |      |   |   |
| 22698 | 191.054611206055     | 0.00 | 1 |   |
| ;     |                      |      |   |   |
| 22699 | 190.912658691406     | 0.00 | 1 |   |
| ;     |                      |      |   |   |
| 22700 | 220.078659057617     | 0.01 | 1 |   |
| ;     |                      |      |   |   |
| 22701 | 195.45036315918 0.00 |      | 1 | ; |
| 22702 | 195.716934204102     | 0.09 | 1 |   |
| ;     |                      |      |   |   |
| 22703 | 234.416351318359     | 0.01 | 1 |   |
| ;     |                      |      |   |   |

|       |                      |      |   |   |
|-------|----------------------|------|---|---|
| 22704 | 235.780395507813     | 0.06 | 1 |   |
| ;     |                      |      |   |   |
| 22705 | 192.123840332031     | 0.03 | 1 |   |
| ;     |                      |      |   |   |
| 22706 | 219.682388305664     | 0.00 | 1 |   |
| ;     |                      |      |   |   |
| 22707 | 226.257125854492     | 0.04 | 1 |   |
| ;     |                      |      |   |   |
| 22708 | 226.368499755859     | 0.06 | 1 |   |
| ;     |                      |      |   |   |
| 22709 | 226.46842956543 0.01 |      | 1 | ; |
| 22710 | 227.060485839844     | 0.04 | 1 |   |
| ;     |                      |      |   |   |
| 22711 | 204.074417114258     | 0.03 | 1 |   |
| ;     |                      |      |   |   |
| 22712 | 234.066207885742     | 0.00 | 1 |   |
| ;     |                      |      |   |   |
| 22713 | 210.585296630859     | 0.06 | 1 |   |
| ;     |                      |      |   |   |
| 22714 | 220.734283447266     | 0.04 | 1 |   |
| ;     |                      |      |   |   |
| 22715 | 221.200439453125     | 0.04 | 1 |   |
| ;     |                      |      |   |   |
| 22716 | 220.325836181641     | 0.06 | 1 |   |
| ;     |                      |      |   |   |
| 22717 | 219.896087646484     | 0.05 | 1 |   |
| ;     |                      |      |   |   |
| 22718 | 204.007461547852     | 0.02 | 1 |   |
| ;     |                      |      |   |   |
| 22719 | 203.788543701172     | 0.03 | 1 |   |
| ;     |                      |      |   |   |
| 22720 | 230.162033081055     | 0.00 | 1 |   |
| ;     |                      |      |   |   |
| 22721 | 230.383041381836     | 0.00 | 1 |   |
| ;     |                      |      |   |   |
| 22722 | 214.997894287109     | 0.01 | 1 |   |
| ;     |                      |      |   |   |
| 22723 | 214.945281982422     | 0.01 | 1 |   |
| ;     |                      |      |   |   |
| 22724 | 217.420272827148     | 0.05 | 1 |   |
| ;     |                      |      |   |   |
| 22725 | 217.429336547852     | 0.00 | 1 |   |
| ;     |                      |      |   |   |
| 22726 | 208.482925415039     | 0.00 | 1 |   |
| ;     |                      |      |   |   |
| 22727 | 219.596496582031     | 0.02 | 1 |   |
| ;     |                      |      |   |   |
| 22728 | 223.419387817383     | 0.02 | 1 |   |
| ;     |                      |      |   |   |
| 22729 | 223.485733032227     | 0.02 | 1 |   |

|       |                      |      |   |  |   |
|-------|----------------------|------|---|--|---|
| ;     |                      |      |   |  |   |
| 22730 | 229.808319091797     | 0.00 | 1 |  |   |
| ;     |                      |      |   |  |   |
| 22731 | 224.282989501953     | 0.01 | 1 |  |   |
| ;     |                      |      |   |  |   |
| 22732 | 201.307205200195     | 0.01 | 1 |  |   |
| ;     |                      |      |   |  |   |
| 22733 | 201.318984985352     | 0.00 | 1 |  |   |
| ;     |                      |      |   |  |   |
| 22734 | 236.447601318359     | 0.00 | 1 |  |   |
| ;     |                      |      |   |  |   |
| 22735 | 233.636413574219     | 0.02 | 1 |  |   |
| ;     |                      |      |   |  |   |
| 22736 | 221.095275878906     | 0.00 | 1 |  |   |
| ;     |                      |      |   |  |   |
| 22737 | 221.113876342773     | 0.00 | 1 |  |   |
| ;     |                      |      |   |  |   |
| 22738 | 234.033493041992     | 0.05 | 1 |  |   |
| ;     |                      |      |   |  |   |
| 22739 | 234.044982910156     | 0.04 | 1 |  |   |
| ;     |                      |      |   |  |   |
| 22740 | 234.377349853516     | 0.05 | 1 |  |   |
| ;     |                      |      |   |  |   |
| 22741 | 234.766983032227     | 0.04 | 1 |  |   |
| ;     |                      |      |   |  |   |
| 22742 | 235.097045898438     | 0.01 | 1 |  |   |
| ;     |                      |      |   |  |   |
| 22743 | 235.314926147461     | 0.00 | 1 |  |   |
| ;     |                      |      |   |  |   |
| 22744 | 233.641342163086     | 0.02 | 1 |  |   |
| ;     |                      |      |   |  |   |
| 22745 | 233.774215698242     | 0.03 | 1 |  |   |
| ;     |                      |      |   |  |   |
| 22746 | 208.683944702148     | 0.01 | 1 |  |   |
| ;     |                      |      |   |  |   |
| 22747 | 209.00959777832 0.01 |      | 1 |  | ; |
| 22748 | 206.774841308594     | 0.04 | 1 |  |   |
| ;     |                      |      |   |  |   |
| 22749 | 206.689041137695     | 0.08 | 1 |  |   |
| ;     |                      |      |   |  |   |
| 22750 | 209.058242797852     | 0.01 | 1 |  |   |
| ;     |                      |      |   |  |   |
| 22751 | 208.67155456543 0.01 |      | 1 |  | ; |
| 22752 | 204.436019897461     | 0.06 | 1 |  |   |
| ;     |                      |      |   |  |   |
| 22753 | 202.634765625 0.01   |      | 1 |  | ; |
| 22754 | 202.602569580078     | 0.04 | 1 |  |   |
| ;     |                      |      |   |  |   |
| 22755 | 205.346405029297     | 0.01 | 1 |  |   |
| ;     |                      |      |   |  |   |



|       |                  |      |   |   |
|-------|------------------|------|---|---|
| 22756 | 205.982986450195 | 0.01 | 1 |   |
| ;     |                  |      |   |   |
| 22757 | 201.884780883789 | 0.00 | 1 |   |
| ;     |                  |      |   |   |
| 22758 | 201.893081665039 | 0.00 | 1 |   |
| ;     |                  |      |   |   |
| 22759 | 201.759750366211 | 0.00 | 1 |   |
| ;     |                  |      |   |   |
| 22760 | 201.748489379883 | 0.32 | 1 |   |
| ;     |                  |      |   |   |
| 22761 | 224.40739440918  | 0.00 | 1 |   |
| 22762 | 214.829650878906 | 0.05 | 1 | ; |
| ;     |                  |      |   |   |
| 22763 | 214.283782958984 | 0.07 | 1 |   |
| ;     |                  |      |   |   |
| 22764 | 214.600891113281 | 0.00 | 1 |   |
| ;     |                  |      |   |   |
| 22765 | 214.836959838867 | 0.01 | 1 |   |
| ;     |                  |      |   |   |
| 22766 | 216.060836791992 | 0.03 | 1 |   |
| ;     |                  |      |   |   |
| 22767 | 215.402725219727 | 0.04 | 1 |   |
| ;     |                  |      |   |   |
| 22768 | 226.654678344727 | 0.00 | 1 |   |
| ;     |                  |      |   |   |
| 22769 | 226.745544433594 | 0.03 | 1 |   |
| ;     |                  |      |   |   |
| 22770 | 209.678344726563 | 0.00 | 1 |   |
| ;     |                  |      |   |   |
| 22771 | 217.185165405273 | 0.01 | 1 |   |
| ;     |                  |      |   |   |
| 22772 | 216.776519775391 | 0.06 | 1 |   |
| ;     |                  |      |   |   |
| 22773 | 206.032470703125 | 0.00 | 1 |   |
| ;     |                  |      |   |   |
| 22774 | 205              | 0.05 | 1 | ; |
| 22775 | 205              | 0.02 | 1 | ; |
| 22776 | 221.994827270508 | 0.02 | 1 |   |
| ;     |                  |      |   |   |
| 22777 | 222.514801025391 | 0.03 | 1 |   |
| ;     |                  |      |   |   |
| 22778 | 205              | 0.02 | 1 | ; |
| 22779 | 205              | 0.00 | 1 | ; |
| 22780 | 205              | 0.00 | 1 | ; |
| 22781 | 235.182464599609 | 0.00 | 1 |   |
| ;     |                  |      |   |   |
| 22782 | 196.006378173828 | 0.01 | 1 |   |
| ;     |                  |      |   |   |
| 22783 | 196.333145141602 | 0.01 | 1 |   |
| ;     |                  |      |   |   |

|       |                      |      |   |   |
|-------|----------------------|------|---|---|
| 22784 | 233.913497924805     | 0.06 | 1 |   |
| ;     |                      |      |   |   |
| 22785 | 196.098205566406     | 0.05 | 1 |   |
| ;     |                      |      |   |   |
| 22786 | 234.05583190918 0.01 |      | 1 | ; |
| 22787 | 232.680725097656     | 0.02 | 1 |   |
| ;     |                      |      |   |   |
| 22788 | 232.689147949219     | 0.02 | 1 |   |
| ;     |                      |      |   |   |
| 22789 | 212.421829223633     | 0.04 | 1 |   |
| ;     |                      |      |   |   |
| 22790 | 205.695129394531     | 0.08 | 1 |   |
| ;     |                      |      |   |   |
| 22791 | 203.551544189453     | 0.01 | 1 |   |
| ;     |                      |      |   |   |
| 22792 | 201.338088989258     | 0.00 | 1 |   |
| ;     |                      |      |   |   |
| 22793 | 215.390075683594     | 0.02 | 1 |   |
| ;     |                      |      |   |   |
| 22794 | 224.391906738281     | 0.01 | 1 |   |
| ;     |                      |      |   |   |
| 22795 | 227.080322265625     | 0.01 | 1 |   |
| ;     |                      |      |   |   |
| 22796 | 208.372863769531     | 0.03 | 1 |   |
| ;     |                      |      |   |   |
| 22797 | 203.507415771484     | 0.04 | 1 |   |
| ;     |                      |      |   |   |
| 22798 | 203.09602355957 0.02 |      | 1 | ; |
| 22799 | 203.85546875 0.05    |      | 1 | ; |
| 22800 | 203.122146606445     | 0.02 | 1 |   |
| ;     |                      |      |   |   |
| 22801 | 203.710418701172     | 0.02 | 1 |   |
| ;     |                      |      |   |   |
| 22802 | 203.155197143555     | 0.01 | 1 |   |
| ;     |                      |      |   |   |
| 22803 | 222.402114868164     | 0.03 | 1 |   |
| ;     |                      |      |   |   |
| 22804 | 222.745941162109     | 0.01 | 1 |   |
| ;     |                      |      |   |   |
| 22805 | 222.031890869141     | 0.01 | 1 |   |
| ;     |                      |      |   |   |
| 22806 | 197.262237548828     | 0.03 | 1 |   |
| ;     |                      |      |   |   |
| 22807 | 217.001007080078     | 0.01 | 1 |   |
| ;     |                      |      |   |   |
| 22808 | 214.543426513672     | 0.01 | 1 |   |
| ;     |                      |      |   |   |
| 22809 | 221.11930847168 0.02 |      | 1 | ; |
| 22810 | 237.057861328125     | 0.08 | 1 |   |
| ;     |                      |      |   |   |

|       |                      |      |   |   |
|-------|----------------------|------|---|---|
| 22811 | 229.728454589844     | 0.05 | 1 |   |
| ;     |                      |      |   |   |
| 22812 | 233.143127441406     | 0.02 | 1 |   |
| ;     |                      |      |   |   |
| 22813 | 233.131896972656     | 0.05 | 1 |   |
| ;     |                      |      |   |   |
| 22814 | 233.550308227539     | 0.01 | 1 |   |
| ;     |                      |      |   |   |
| 22815 | 233.850540161133     | 0.01 | 1 |   |
| ;     |                      |      |   |   |
| 22816 | 231.488006591797     | 0.00 | 1 |   |
| ;     |                      |      |   |   |
| 22817 | 231.501739501953     | 0.01 | 1 |   |
| ;     |                      |      |   |   |
| 22818 | 231.642105102539     | 0.03 | 1 |   |
| ;     |                      |      |   |   |
| 22819 | 232.893402099609     | 0.03 | 1 |   |
| ;     |                      |      |   |   |
| 22820 | 232.904067993164     | 0.02 | 1 |   |
| ;     |                      |      |   |   |
| 22821 | 233.096969604492     | 0.01 | 1 |   |
| ;     |                      |      |   |   |
| 22822 | 233.11018371582 0.02 |      | 1 |   |
| 22823 | 232.817901611328     | 0.02 | 1 | ; |
| ;     |                      |      |   |   |
| 22824 | 232.802536010742     | 0.05 | 1 |   |
| ;     |                      |      |   |   |
| 22825 | 211.612121582031     | 0.05 | 1 |   |
| ;     |                      |      |   |   |
| 22826 | 211.62434387207 0.04 |      | 1 |   |
| 22827 | 212.375152587891     | 0.00 | 1 | ; |
| ;     |                      |      |   |   |
| 22828 | 212.205078125 0.04   |      | 1 |   |
| 22829 | 212.185516357422     | 0.01 | 1 | ; |
| ;     |                      |      |   |   |
| 22830 | 212.172668457031     | 0.00 | 1 |   |
| ;     |                      |      |   |   |
| 22831 | 209.550216674805     | 0.00 | 1 |   |
| ;     |                      |      |   |   |
| 22832 | 209.559448242188     | 0.05 | 1 |   |
| ;     |                      |      |   |   |
| 22833 | 210.175354003906     | 0.04 | 1 |   |
| ;     |                      |      |   |   |
| 22834 | 210.269760131836     | 0.24 | 1 |   |
| ;     |                      |      |   |   |
| 22835 | 210.733489990234     | 0.04 | 1 |   |
| ;     |                      |      |   |   |
| 22836 | 198.726654052734     | 0.02 | 1 |   |
| ;     |                      |      |   |   |
| 22837 | 198.732696533203     | 0.01 | 1 |   |

|   |       |                  |      |   |
|---|-------|------------------|------|---|
| ; | 22838 | 199.670440673828 | 0.05 | 1 |
| ; | 22839 | 199.635025024414 | 0.01 | 1 |
| ; | 22840 | 223.424133300781 | 0.00 | 1 |
| ; | 22841 | 223.436676025391 | 0.02 | 1 |
| ; | 22842 | 223.407608032227 | 0.02 | 1 |
| ; | 22843 | 221.101150512695 | 0.00 | 1 |
| ; | 22844 | 220.096466064453 | 0.03 | 1 |
| ; | 22845 | 223.415161132813 | 0.03 | 1 |
| ; | 22846 | 194.364944458008 | 0.01 | 1 |
| ; | 22847 | 194.365264892578 | 0.03 | 1 |
| ; | 22848 | 207.913589477539 | 0.07 | 1 |
| ; | 22849 | 208.354080200195 | 0.03 | 1 |
| ; | 22850 | 208.363998413086 | 0.01 | 1 |
| ; | 22851 | 208.988204956055 | 0.05 | 1 |
| ; | 22852 | 208.976989746094 | 0.00 | 1 |
| ; | 22853 | 209.785995483398 | 0.01 | 1 |
| ; | 22854 | 209.069885253906 | 0.01 | 1 |
| ; | 22855 | 209.086761474609 | 0.01 | 1 |
| ; | 22856 | 201.669052124023 | 0.01 | 1 |
| ; | 22857 | 202.227249145508 | 0.01 | 1 |
| ; | 22858 | 204.941055297852 | 0.03 | 1 |
| ; | 22859 | 204.427536010742 | 0.01 | 1 |
| ; | 22860 | 208.267623901367 | 0.00 | 1 |
| ; | 22861 | 219.070175170898 | 0.03 | 1 |
| ; | 22862 | 202.184463500977 | 0.00 | 1 |

|       |                  |      |   |   |   |
|-------|------------------|------|---|---|---|
| ;     |                  |      |   |   |   |
| 22863 | 202.347625732422 | 0.00 |   | 1 |   |
| ;     |                  |      |   |   |   |
| 22864 | 218.790344238281 | 0.00 |   | 1 |   |
| ;     |                  |      |   |   |   |
| 22865 | 227.223510742188 | 0.09 |   | 1 |   |
| ;     |                  |      |   |   |   |
| 22866 | 227.275772094727 | 0.04 |   | 1 |   |
| ;     |                  |      |   |   |   |
| 22867 | 207.81884765625  | 0.05 | 1 |   | ; |
| 22868 | 207.440032958984 | 0.02 |   | 1 |   |
| ;     |                  |      |   |   |   |
| 22869 | 217.740234375    | 0.01 | 1 |   | ; |
| 22870 | 231.140213012695 | 0.03 |   | 1 |   |
| ;     |                  |      |   |   |   |
| 22871 | 230.725646972656 | 0.06 |   | 1 |   |
| ;     |                  |      |   |   |   |
| 22872 | 232.299575805664 | 0.03 |   | 1 |   |
| ;     |                  |      |   |   |   |
| 22873 | 216.437118530273 | 0.01 |   | 1 |   |
| ;     |                  |      |   |   |   |
| 22874 | 216.568222045898 | 0.04 |   | 1 |   |
| ;     |                  |      |   |   |   |
| 22875 | 216.903442382813 | 0.01 |   | 1 |   |
| ;     |                  |      |   |   |   |
| 22876 | 216.813003540039 | 0.03 |   | 1 |   |
| ;     |                  |      |   |   |   |
| 22877 | 217.843017578125 | 0.03 |   | 1 |   |
| ;     |                  |      |   |   |   |
| 22878 | 235.25749206543  | 0.07 | 1 |   | ; |
| 22879 | 235.526901245117 | 0.03 |   | 1 |   |
| ;     |                  |      |   |   |   |
| 22880 | 237.099868774414 | 0.01 |   | 1 |   |
| ;     |                  |      |   |   |   |
| 22881 | 229.655807495117 | 0.01 |   | 1 |   |
| ;     |                  |      |   |   |   |
| 22882 | 232.549026489258 | 0.04 |   | 1 |   |
| ;     |                  |      |   |   |   |
| 22883 | 231.425689697266 | 0.01 |   | 1 |   |
| ;     |                  |      |   |   |   |
| 22884 | 231.690658569336 | 0.01 |   | 1 |   |
| ;     |                  |      |   |   |   |
| 22885 | 230.98210144043  | 0.04 | 1 |   | ; |
| 22886 | 231.442535400391 | 0.01 |   | 1 |   |
| ;     |                  |      |   |   |   |
| 22887 | 237.24983215332  | 0.01 | 1 |   | ; |
| 22888 | 234.138397216797 | 0.04 |   | 1 |   |
| ;     |                  |      |   |   |   |
| 22889 | 195.390487670898 | 0.00 |   | 1 |   |
| ;     |                  |      |   |   |   |

|       |                      |      |   |   |
|-------|----------------------|------|---|---|
| 22890 | 196.594650268555     | 0.02 | 1 |   |
| ;     |                      |      |   |   |
| 22891 | 196.634429931641     | 0.03 | 1 |   |
| ;     |                      |      |   |   |
| 22892 | 196.628204345703     | 0.02 | 1 |   |
| ;     |                      |      |   |   |
| 22893 | 200.247283935547     | 0.01 | 1 |   |
| ;     |                      |      |   |   |
| 22894 | 221.426986694336     | 0.00 | 1 |   |
| ;     |                      |      |   |   |
| 22895 | 221.74397277832 0.04 |      | 1 | ; |
| 22896 | 229.406280517578     | 0.02 | 1 |   |
| ;     |                      |      |   |   |
| 22897 | 220.314270019531     | 0.00 | 1 |   |
| ;     |                      |      |   |   |
| 22898 | 215.458770751953     | 0.01 | 1 |   |
| ;     |                      |      |   |   |
| 22899 | 201.856018066406     | 0.01 | 1 |   |
| ;     |                      |      |   |   |
| 22900 | 233.591415405273     | 0.02 | 1 |   |
| ;     |                      |      |   |   |
| 22901 | 233.354263305664     | 0.01 | 1 |   |
| ;     |                      |      |   |   |
| 22902 | 204.589126586914     | 0.01 | 1 |   |
| ;     |                      |      |   |   |
| 22903 | 204.787155151367     | 0.05 | 1 |   |
| ;     |                      |      |   |   |
| 22904 | 204.29313659668 0.04 |      | 1 | ; |
| 22905 | 222.067474365234     | 0.01 | 1 |   |
| ;     |                      |      |   |   |
| 22906 | 222.161056518555     | 0.00 | 1 |   |
| ;     |                      |      |   |   |
| 22907 | 202.112945556641     | 0.02 | 1 |   |
| ;     |                      |      |   |   |
| 22908 | 202.48014831543 0.01 |      | 1 | ; |
| 22909 | 200 0.01             |      | 1 | ; |
| 22910 | 200 0.00             |      | 1 | ; |
| 22911 | 197.565521240234     | 0.02 | 1 |   |
| ;     |                      |      |   |   |
| 22912 | 198.241165161133     | 0.04 | 1 |   |
| ;     |                      |      |   |   |
| 22913 | 203.261932373047     | 0.00 | 1 |   |
| ;     |                      |      |   |   |
| 22914 | 203.293975830078     | 0.01 | 1 |   |
| ;     |                      |      |   |   |
| 22915 | 203.266052246094     | 0.01 | 1 |   |
| ;     |                      |      |   |   |
| 22916 | 203.261291503906     | 0.00 | 1 |   |
| ;     |                      |      |   |   |
| 22917 | 202.492553710938     | 0.01 | 1 |   |

|       |                  |      |   |   |
|-------|------------------|------|---|---|
| ;     |                  |      |   |   |
| 22918 | 202.936889648438 | 0.00 | 1 |   |
| ;     |                  |      |   |   |
| 22919 | 202.862762451172 | 0.00 | 1 |   |
| ;     |                  |      |   |   |
| 22920 | 213.523574829102 | 0.01 | 1 |   |
| ;     |                  |      |   |   |
| 22921 | 213.602523803711 | 0.01 | 1 |   |
| ;     |                  |      |   |   |
| 22922 | 213.799819946289 | 0.01 | 1 |   |
| ;     |                  |      |   |   |
| 22923 | 213.838592529297 | 0.04 | 1 |   |
| ;     |                  |      |   |   |
| 22924 | 208.731979370117 | 0.01 | 1 |   |
| ;     |                  |      |   |   |
| 22925 | 208.992752075195 | 0.04 | 1 |   |
| ;     |                  |      |   |   |
| 22926 | 219.728057861328 | 0.01 | 1 |   |
| ;     |                  |      |   |   |
| 22927 | 197.18701171875  | 0.02 | 1 |   |
| 22928 | 198.235168457031 | 0.02 | 1 | ; |
| ;     |                  |      |   |   |
| 22929 | 197.737747192383 | 0.01 | 1 |   |
| ;     |                  |      |   |   |
| 22930 | 210.254516601563 | 0.02 | 1 |   |
| ;     |                  |      |   |   |
| 22931 | 210.259414672852 | 0.01 | 1 |   |
| ;     |                  |      |   |   |
| 22932 | 210.215911865234 | 0.05 | 1 |   |
| ;     |                  |      |   |   |
| 22933 | 210.226623535156 | 0.04 | 1 |   |
| ;     |                  |      |   |   |
| 22934 | 210.181060791016 | 0.01 | 1 |   |
| ;     |                  |      |   |   |
| 22935 | 210.24479675293  | 0.03 | 1 |   |
| 22936 | 210.610443115234 | 0.00 | 1 | ; |
| ;     |                  |      |   |   |
| 22937 | 210.272308349609 | 0.00 | 1 |   |
| ;     |                  |      |   |   |
| 22938 | 210.57145690918  | 0.00 | 1 |   |
| 22939 | 210.233688354492 | 0.00 | 1 | ; |
| ;     |                  |      |   |   |
| 22940 | 200.043014526367 | 0.00 | 1 |   |
| ;     |                  |      |   |   |
| 22941 | 207.34260559082  | 0.04 | 1 |   |
| 22942 | 233.985763549805 | 0.03 | 1 | ; |
| ;     |                  |      |   |   |
| 22943 | 234.411499023438 | 0.04 | 1 |   |
| ;     |                  |      |   |   |
| 22944 | 209.552124023438 | 0.00 | 1 |   |

|       |                  |      |   |   |   |
|-------|------------------|------|---|---|---|
| ;     |                  |      |   |   |   |
| 22945 | 205.659851074219 | 0.03 |   | 1 |   |
| ;     |                  |      |   |   |   |
| 22946 | 205.571029663086 | 0.06 |   | 1 |   |
| ;     |                  |      |   |   |   |
| 22947 | 206.878295898438 | 0.02 |   | 1 |   |
| ;     |                  |      |   |   |   |
| 22948 | 206.881195068359 | 0.02 |   | 1 |   |
| ;     |                  |      |   |   |   |
| 22949 | 207.102844238281 | 0.02 |   | 1 |   |
| ;     |                  |      |   |   |   |
| 22950 | 207.099349975586 | 0.02 |   | 1 |   |
| ;     |                  |      |   |   |   |
| 22951 | 214.600402832031 | 0.01 |   | 1 |   |
| ;     |                  |      |   |   |   |
| 22952 | 214.787124633789 | 0.00 |   | 1 |   |
| ;     |                  |      |   |   |   |
| 22953 | 206.128875732422 | 0.05 |   | 1 |   |
| ;     |                  |      |   |   |   |
| 22954 | 193.139129638672 | 0.01 |   | 1 |   |
| ;     |                  |      |   |   |   |
| 22955 | 209.54606628418  | 0.06 | 1 |   | ; |
| 22956 | 210.061126708984 | 0.01 |   | 1 |   |
| ;     |                  |      |   |   |   |
| 22957 | 209.934768676758 | 0.01 |   | 1 |   |
| ;     |                  |      |   |   |   |
| 22958 | 207.7705078125   | 0.10 | 1 |   | ; |
| 22959 | 208.104293823242 | 0.02 |   | 1 |   |
| ;     |                  |      |   |   |   |
| 22960 | 207.197891235352 | 0.09 |   | 1 |   |
| ;     |                  |      |   |   |   |
| 22961 | 200.990203857422 | 0.01 |   | 1 |   |
| ;     |                  |      |   |   |   |
| 22962 | 200.552368164063 | 0.01 |   | 1 |   |
| ;     |                  |      |   |   |   |
| 22963 | 200.533676147461 | 0.02 |   | 1 |   |
| ;     |                  |      |   |   |   |
| 22964 | 214.653305053711 | 0.02 |   | 1 |   |
| ;     |                  |      |   |   |   |
| 22965 | 214.847305297852 | 0.03 |   | 1 |   |
| ;     |                  |      |   |   |   |
| 22966 | 214.949920654297 | 0.01 |   | 1 |   |
| ;     |                  |      |   |   |   |
| 22967 | 206.866806030273 | 0.04 |   | 1 |   |
| ;     |                  |      |   |   |   |
| 22968 | 206.960571289063 | 0.00 |   | 1 |   |
| ;     |                  |      |   |   |   |
| 22969 | 219.425720214844 | 0.02 |   | 1 |   |
| ;     |                  |      |   |   |   |
| 22970 | 219.97966003418  | 0.02 | 1 |   | ; |



|       |                  |      |   |   |  |  |
|-------|------------------|------|---|---|--|--|
| 22971 | 203.97639465332  | 0.00 | 1 |   |  |  |
| 22972 | 218.701049804688 | 0.03 |   | 1 |  |  |
| ;     |                  |      |   |   |  |  |
| 22973 | 208.242752075195 | 0.04 |   | 1 |  |  |
| ;     |                  |      |   |   |  |  |
| 22974 | 217.197906494141 | 0.02 |   | 1 |  |  |
| ;     |                  |      |   |   |  |  |
| 22975 | 215.700729370117 | 0.01 |   | 1 |  |  |
| ;     |                  |      |   |   |  |  |
| 22976 | 207.953475952148 | 0.08 |   | 1 |  |  |
| ;     |                  |      |   |   |  |  |
| 22977 | 208.114151000977 | 0.04 |   | 1 |  |  |
| ;     |                  |      |   |   |  |  |
| 22978 | 216.541259765625 | 0.02 |   | 1 |  |  |
| ;     |                  |      |   |   |  |  |
| 22979 | 216.98176574707  | 0.02 | 1 |   |  |  |
| 22980 | 212.905364990234 | 0.04 |   | 1 |  |  |
| ;     |                  |      |   |   |  |  |
| 22981 | 235.910583496094 | 0.00 |   | 1 |  |  |
| ;     |                  |      |   |   |  |  |
| 22982 | 205.311187744141 | 0.06 |   | 1 |  |  |
| ;     |                  |      |   |   |  |  |
| 22983 | 198.697982788086 | 0.02 |   | 1 |  |  |
| ;     |                  |      |   |   |  |  |
| 22984 | 198.69367980957  | 0.03 | 1 |   |  |  |
| 22985 | 204.066131591797 | 0.03 |   | 1 |  |  |
| ;     |                  |      |   |   |  |  |
| 22986 | 233.874160766602 | 0.03 |   | 1 |  |  |
| ;     |                  |      |   |   |  |  |
| 22987 | 221.197158813477 | 0.01 |   | 1 |  |  |
| ;     |                  |      |   |   |  |  |
| 22988 | 200              | 0.06 | 1 |   |  |  |
| 22989 | 200              | 0.01 | 1 |   |  |  |
| 22990 | 235.298828125    | 0.01 | 1 |   |  |  |
| 22991 | 235.041244506836 | 0.00 |   | 1 |  |  |
| ;     |                  |      |   |   |  |  |
| 22992 | 204.171646118164 | 0.03 |   | 1 |  |  |
| ;     |                  |      |   |   |  |  |
| 22993 | 203.793441772461 | 0.00 |   | 1 |  |  |
| ;     |                  |      |   |   |  |  |
| 22994 | 219.60791015625  | 0.03 | 1 |   |  |  |
| 22995 | 220.491775512695 | 0.19 |   | 1 |  |  |
| ;     |                  |      |   |   |  |  |
| 22996 | 220.800918579102 | 0.02 |   | 1 |  |  |
| ;     |                  |      |   |   |  |  |
| 22997 | 221.023620605469 | 0.02 |   | 1 |  |  |
| ;     |                  |      |   |   |  |  |
| 22998 | 221.287643432617 | 0.05 |   | 1 |  |  |
| ;     |                  |      |   |   |  |  |
| 22999 | 200.259826660156 | 0.01 |   | 1 |  |  |

|       |                  |      |   |   |
|-------|------------------|------|---|---|
| ;     |                  |      |   |   |
| 23000 | 201.706436157227 | 0.01 | 1 |   |
| ;     |                  |      |   |   |
| 23001 | 202.287063598633 | 0.01 | 1 |   |
| ;     |                  |      |   |   |
| 23002 | 202.900009155273 | 0.00 | 1 |   |
| ;     |                  |      |   |   |
| 23003 | 203.56282043457  | 0.00 | 1 |   |
| 23004 | 199.362152099609 | 0.01 | 1 | ; |
| ;     |                  |      |   |   |
| 23005 | 199.037948608398 | 0.03 | 1 |   |
| ;     |                  |      |   |   |
| 23006 | 199.257308959961 | 0.02 | 1 |   |
| ;     |                  |      |   |   |
| 23007 | 202.140213012695 | 0.06 | 1 |   |
| ;     |                  |      |   |   |
| 23008 | 204.609848022461 | 0.01 | 1 |   |
| ;     |                  |      |   |   |
| 23009 | 203.23828125     | 0.01 | 1 |   |
| 23010 | 204.286956787109 | 0.01 | 1 | ; |
| ;     |                  |      |   |   |
| 23011 | 201.443389892578 | 0.00 | 1 |   |
| ;     |                  |      |   |   |
| 23012 | 201.488845825195 | 0.00 | 1 |   |
| ;     |                  |      |   |   |
| 23013 | 203.571197509766 | 0.04 | 1 |   |
| ;     |                  |      |   |   |
| 23014 | 203.753356933594 | 0.04 | 1 |   |
| ;     |                  |      |   |   |
| 23015 | 203.977584838867 | 0.04 | 1 |   |
| ;     |                  |      |   |   |
| 23016 | 232.791320800781 | 0.02 | 1 |   |
| ;     |                  |      |   |   |
| 23017 | 232.996124267578 | 0.01 | 1 |   |
| ;     |                  |      |   |   |
| 23018 | 203.356430053711 | 0.01 | 1 |   |
| ;     |                  |      |   |   |
| 23019 | 202.170227050781 | 0.01 | 1 |   |
| ;     |                  |      |   |   |
| 23020 | 203.772689819336 | 0.02 | 1 |   |
| ;     |                  |      |   |   |
| 23021 | 202.530456542969 | 0.01 | 1 |   |
| ;     |                  |      |   |   |
| 23022 | 215.237426757813 | 0.02 | 1 |   |
| ;     |                  |      |   |   |
| 23023 | 207.932891845703 | 0.07 | 1 |   |
| ;     |                  |      |   |   |
| 23024 | 204.365676879883 | 0.01 | 1 |   |
| ;     |                  |      |   |   |
| 23025 | 204.554611206055 | 0.05 | 1 |   |

|       |                  |      |   |   |
|-------|------------------|------|---|---|
| ;     |                  |      |   |   |
| 23026 | 213.153594970703 | 0.02 | 1 |   |
| ;     |                  |      |   |   |
| 23027 | 212.218292236328 | 0.03 | 1 |   |
| ;     |                  |      |   |   |
| 23028 | 212.619430541992 | 0.02 | 1 |   |
| ;     |                  |      |   |   |
| 23029 | 197.440887451172 | 0.03 | 1 |   |
| ;     |                  |      |   |   |
| 23030 | 216.913055419922 | 0.03 | 1 |   |
| ;     |                  |      |   |   |
| 23031 | 216.147674560547 | 0.06 | 1 |   |
| ;     |                  |      |   |   |
| 23032 | 217.142868041992 | 0.03 | 1 |   |
| ;     |                  |      |   |   |
| 23033 | 215.855850219727 | 0.02 | 1 |   |
| ;     |                  |      |   |   |
| 23034 | 199.776138305664 | 0.02 | 1 |   |
| ;     |                  |      |   |   |
| 23035 | 199.962966918945 | 0.01 | 1 |   |
| ;     |                  |      |   |   |
| 23036 | 201.204177856445 | 0.00 | 1 |   |
| ;     |                  |      |   |   |
| 23037 | 212.872375488281 | 0.04 | 1 |   |
| ;     |                  |      |   |   |
| 23038 | 213.172256469727 | 0.02 | 1 |   |
| ;     |                  |      |   |   |
| 23039 | 208.068344116211 | 0.00 | 1 |   |
| ;     |                  |      |   |   |
| 23040 | 208.19694519043  | 0.02 | 1 |   |
| 23041 | 201.604629516602 | 0.02 | 1 | ; |
| ;     |                  |      |   |   |
| 23042 | 199.171264648438 | 0.00 | 1 |   |
| ;     |                  |      |   |   |
| 23043 | 199.316253662109 | 0.03 | 1 |   |
| ;     |                  |      |   |   |
| 23044 | 215.473266601563 | 0.00 | 1 |   |
| ;     |                  |      |   |   |
| 23045 | 202.358917236328 | 0.01 | 1 |   |
| ;     |                  |      |   |   |
| 23046 | 202.511581420898 | 0.01 | 1 |   |
| ;     |                  |      |   |   |
| 23047 | 202.522842407227 | 0.00 | 1 |   |
| ;     |                  |      |   |   |
| 23048 | 202.548904418945 | 0.00 | 1 |   |
| ;     |                  |      |   |   |
| 23049 | 201.388641357422 | 0.01 | 1 |   |
| ;     |                  |      |   |   |
| 23050 | 201.606781005859 | 0.01 | 1 |   |
| ;     |                  |      |   |   |

|       |                  |      |   |   |
|-------|------------------|------|---|---|
| 23051 | 209.826919555664 | 0.02 | 1 |   |
| ;     |                  |      |   |   |
| 23052 | 210.011520385742 | 0.01 | 1 |   |
| ;     |                  |      |   |   |
| 23053 | 204.610397338867 | 0.02 | 1 |   |
| ;     |                  |      |   |   |
| 23054 | 205.061706542969 | 0.01 | 1 |   |
| ;     |                  |      |   |   |
| 23055 | 212.673324584961 | 0.01 | 1 |   |
| ;     |                  |      |   |   |
| 23056 | 204.125335693359 | 0.02 | 1 |   |
| ;     |                  |      |   |   |
| 23057 | 203.983016967773 | 0.01 | 1 |   |
| ;     |                  |      |   |   |
| 23058 | 205.831481933594 | 0.00 | 1 |   |
| ;     |                  |      |   |   |
| 23059 | 232.498291015625 | 0.01 | 1 |   |
| ;     |                  |      |   |   |
| 23060 | 220              | 0.03 | 1 | ; |
| 23061 | 220.417465209961 | 0.03 | 1 |   |
| ;     |                  |      |   |   |
| 23062 | 220              | 0.01 | 1 | ; |
| 23063 | 220              | 0.01 | 1 | ; |
| 23064 | 204.515121459961 | 0.04 | 1 |   |
| ;     |                  |      |   |   |
| 23065 | 197.611450195313 | 0.01 | 1 |   |
| ;     |                  |      |   |   |
| 23066 | 232.694198608398 | 0.01 | 1 |   |
| ;     |                  |      |   |   |
| 23067 | 233.167984008789 | 0.01 | 1 |   |
| ;     |                  |      |   |   |
| 23068 | 232.451217651367 | 0.01 | 1 |   |
| ;     |                  |      |   |   |
| 23069 | 204.980773925781 | 0.02 | 1 |   |
| ;     |                  |      |   |   |
| 23070 | 205.009323120117 | 0.04 | 1 |   |
| ;     |                  |      |   |   |
| 23071 | 201.363082885742 | 0.05 | 1 |   |
| ;     |                  |      |   |   |
| 23072 | 200.538284301758 | 0.01 | 1 |   |
| ;     |                  |      |   |   |
| 23073 | 220.788864135742 | 0.02 | 1 |   |
| ;     |                  |      |   |   |
| 23074 | 204.847640991211 | 0.02 | 1 |   |
| ;     |                  |      |   |   |
| 23075 | 203.990249633789 | 0.02 | 1 |   |
| ;     |                  |      |   |   |
| 23076 | 203.955307006836 | 0.02 | 1 |   |
| ;     |                  |      |   |   |
| 23077 | 204.338882446289 | 0.01 | 1 |   |

|       |                  |      |   |   |
|-------|------------------|------|---|---|
| ;     |                  |      |   |   |
| 23078 | 200.135864257813 | 0.02 | 1 |   |
| ;     |                  |      |   |   |
| 23079 | 199.155426025391 | 0.01 | 1 |   |
| ;     |                  |      |   |   |
| 23080 | 199.745101928711 | 0.00 | 1 |   |
| ;     |                  |      |   |   |
| 23081 | 199.738037109375 | 0.02 | 1 |   |
| ;     |                  |      |   |   |
| 23082 | 203.214279174805 | 0.01 | 1 |   |
| ;     |                  |      |   |   |
| 23084 | 202.456344604492 | 0.08 | 1 |   |
| ;     |                  |      |   |   |
| 23085 | 204.487579345703 | 0.00 | 1 |   |
| ;     |                  |      |   |   |
| 23086 | 202.523880004883 | 0.00 | 1 |   |
| ;     |                  |      |   |   |
| 23087 | 202.5625         | 0.01 | 1 | ; |
| 23088 | 201.175415039063 | 0.01 | 1 |   |
| ;     |                  |      |   |   |
| 23089 | 201.370315551758 | 0.01 | 1 |   |
| ;     |                  |      |   |   |
| 23090 | 216.305892944336 | 0.01 | 1 |   |
| ;     |                  |      |   |   |
| 23091 | 216.154907226563 | 0.01 | 1 |   |
| ;     |                  |      |   |   |
| 23092 | 215.882507324219 | 0.00 | 1 |   |
| ;     |                  |      |   |   |
| 23093 | 214.843002319336 | 0.01 | 1 |   |
| ;     |                  |      |   |   |
| 23094 | 197.483276367188 | 0.01 | 1 |   |
| ;     |                  |      |   |   |
| 23095 | 199.297592163086 | 0.00 | 1 |   |
| ;     |                  |      |   |   |
| 23096 | 199.444076538086 | 0.02 | 1 |   |
| ;     |                  |      |   |   |
| 23097 | 199.490600585938 | 0.00 | 1 |   |
| ;     |                  |      |   |   |
| 23098 | 209.448776245117 | 0.00 | 1 |   |
| ;     |                  |      |   |   |
| 23099 | 209.520172119141 | 0.02 | 1 |   |
| ;     |                  |      |   |   |
| 23100 | 209.350357055664 | 0.01 | 1 |   |
| ;     |                  |      |   |   |
| 23101 | 202.153701782227 | 0.05 | 1 |   |
| ;     |                  |      |   |   |
| 23102 | 197.315032958984 | 0.03 | 1 |   |
| ;     |                  |      |   |   |
| 23103 | 206.777587890625 | 0.02 | 1 |   |
| ;     |                  |      |   |   |

|       |                  |      |   |  |
|-------|------------------|------|---|--|
| 23104 | 206.696411132813 | 0.02 | 1 |  |
| ;     |                  |      |   |  |
| 23105 | 207.448120117188 | 0.06 | 1 |  |
| ;     |                  |      |   |  |
| 23106 | 207.532379150391 | 0.02 | 1 |  |
| ;     |                  |      |   |  |
| 23107 | 207.839340209961 | 0.08 | 1 |  |
| ;     |                  |      |   |  |
| 23108 | 198.441650390625 | 0.01 | 1 |  |
| ;     |                  |      |   |  |
| 23109 | 197.916656494141 | 0.04 | 1 |  |
| ;     |                  |      |   |  |
| 23110 | 226.761856079102 | 0.02 | 1 |  |
| ;     |                  |      |   |  |
| 23111 | 208.130706787109 | 0.02 | 1 |  |
| ;     |                  |      |   |  |
| 23112 | 208.270767211914 | 0.04 | 1 |  |
| ;     |                  |      |   |  |
| 23113 | 202.677764892578 | 0.07 | 1 |  |
| ;     |                  |      |   |  |
| 23114 | 201.552795410156 | 0.03 | 1 |  |
| ;     |                  |      |   |  |
| 23115 | 231.558654785156 | 0.02 | 1 |  |
| ;     |                  |      |   |  |
| 23116 | 231.851501464844 | 0.01 | 1 |  |
| ;     |                  |      |   |  |
| 23117 | 228.237167358398 | 0.04 | 1 |  |
| ;     |                  |      |   |  |
| 23118 | 202.052886962891 | 0.00 | 1 |  |
| ;     |                  |      |   |  |
| 23119 | 202.201370239258 | 0.00 | 1 |  |
| ;     |                  |      |   |  |
| 23120 | 200.466873168945 | 0.01 | 1 |  |
| ;     |                  |      |   |  |
| 23121 | 205.183685302734 | 0.02 | 1 |  |
| ;     |                  |      |   |  |
| 23122 | 205.183395385742 | 0.01 | 1 |  |
| ;     |                  |      |   |  |
| 23123 | 204.207382202148 | 0.00 | 1 |  |
| ;     |                  |      |   |  |
| 23124 | 204.35302734375  | 0.01 | 1 |  |
| 23125 | 204.132629394531 | 0.01 | 1 |  |
| ;     |                  |      |   |  |
| 23126 | 224.238510131836 | 0.14 | 1 |  |
| ;     |                  |      |   |  |
| 23127 | 224.746719360352 | 0.04 | 1 |  |
| ;     |                  |      |   |  |
| 23128 | 224.36311340332  | 0.02 | 1 |  |
| 23129 | 211.799880981445 | 0.01 | 1 |  |
| ;     |                  |      |   |  |

|       |                  |      |   |   |
|-------|------------------|------|---|---|
| 23130 | 211.991424560547 | 0.03 | 1 |   |
| ;     |                  |      |   |   |
| 23131 | 198.911315917969 | 0.01 | 1 |   |
| ;     |                  |      |   |   |
| 23132 | 198.815017700195 | 0.05 | 1 |   |
| ;     |                  |      |   |   |
| 23133 | 212.653839111328 | 0.00 | 1 |   |
| ;     |                  |      |   |   |
| 23134 | 201.08837890625  | 0.12 | 1 | ; |
| 23135 | 199.807968139648 | 0.01 | 1 |   |
| ;     |                  |      |   |   |
| 23136 | 199.409973144531 | 0.01 | 1 |   |
| ;     |                  |      |   |   |
| 23137 | 200.001007080078 | 0.02 | 1 |   |
| ;     |                  |      |   |   |
| 23138 | 217.433029174805 | 0.00 | 1 |   |
| ;     |                  |      |   |   |
| 23139 | 217.309204101563 | 0.00 | 1 |   |
| ;     |                  |      |   |   |
| 23140 | 216.894638061523 | 0.01 | 1 |   |
| ;     |                  |      |   |   |
| 23141 | 216.904678344727 | 0.01 | 1 |   |
| ;     |                  |      |   |   |
| 23142 | 217.443283081055 | 0.03 | 1 |   |
| ;     |                  |      |   |   |
| 23143 | 218.852005004883 | 0.05 | 1 |   |
| ;     |                  |      |   |   |
| 23144 | 218.813842773438 | 0.05 | 1 |   |
| ;     |                  |      |   |   |
| 23145 | 236.95671081543  | 0.22 | 1 | ; |
| 23146 | 195.848083496094 | 0.06 | 1 |   |
| ;     |                  |      |   |   |
| 23147 | 195.244216918945 | 0.00 | 1 |   |
| ;     |                  |      |   |   |
| 23148 | 207.422348022461 | 0.01 | 1 |   |
| ;     |                  |      |   |   |
| 23149 | 206.988708496094 | 0.00 | 1 |   |
| ;     |                  |      |   |   |
| 23150 | 197.707214355469 | 0.01 | 1 |   |
| ;     |                  |      |   |   |
| 23151 | 195.554977416992 | 0.00 | 1 |   |
| ;     |                  |      |   |   |
| 23152 | 195.575256347656 | 0.00 | 1 |   |
| ;     |                  |      |   |   |
| 23153 | 218.000579833984 | 0.00 | 1 |   |
| ;     |                  |      |   |   |
| 23154 | 218.345367431641 | 0.03 | 1 |   |
| ;     |                  |      |   |   |
| 23155 | 218.396743774414 | 0.05 | 1 |   |
| ;     |                  |      |   |   |

|       |                  |      |   |   |
|-------|------------------|------|---|---|
| 23156 | 218.845291137695 | 0.04 | 1 |   |
| ;     |                  |      |   |   |
| 23157 | 218.800872802734 | 0.01 | 1 |   |
| ;     |                  |      |   |   |
| 23158 | 219.257125854492 | 0.01 | 1 |   |
| ;     |                  |      |   |   |
| 23159 | 198.453109741211 | 0.00 | 1 |   |
| ;     |                  |      |   |   |
| 23160 | 198.72395324707  | 0.01 | 1 | ; |
| 23161 | 200              | 0.11 | 1 | ; |
| 23162 | 205              | 0.03 | 1 | ; |
| 23163 | 205              | 0.00 | 1 | ; |
| 23164 | 198.064178466797 | 0.01 | 1 |   |
| ;     |                  |      |   |   |
| 23165 | 198.585189819336 | 0.03 | 1 |   |
| ;     |                  |      |   |   |
| 23166 | 194.381881713867 | 0.01 | 1 |   |
| ;     |                  |      |   |   |
| 23167 | 194.284622192383 | 0.02 | 1 |   |
| ;     |                  |      |   |   |
| 23168 | 194.319915771484 | 0.00 | 1 |   |
| ;     |                  |      |   |   |
| 23169 | 193.929336547852 | 0.00 | 1 |   |
| ;     |                  |      |   |   |
| 23170 | 193.439971923828 | 0.02 | 1 |   |
| ;     |                  |      |   |   |
| 23171 | 193.489822387695 | 0.02 | 1 |   |
| ;     |                  |      |   |   |
| 23172 | 193.874206542969 | 0.02 | 1 |   |
| ;     |                  |      |   |   |
| 23173 | 193.779907226563 | 0.02 | 1 |   |
| ;     |                  |      |   |   |
| 23174 | 194.671127319336 | 0.00 | 1 |   |
| ;     |                  |      |   |   |
| 23175 | 194.229049682617 | 0.00 | 1 |   |
| ;     |                  |      |   |   |
| 23176 | 194.96842956543  | 0.00 | 1 | ; |
| 23177 | 194.529251098633 | 0.00 | 1 |   |
| ;     |                  |      |   |   |
| 23178 | 195.208084106445 | 0.00 | 1 |   |
| ;     |                  |      |   |   |
| 23179 | 194.91015625     | 0.00 | 1 | ; |
| 23180 | 192.776748657227 | 0.00 | 1 |   |
| ;     |                  |      |   |   |
| 23181 | 192.6552734375   | 0.00 | 1 | ; |
| 23182 | 196.650924682617 | 0.01 | 1 |   |
| ;     |                  |      |   |   |
| 23183 | 197.346176147461 | 0.02 | 1 |   |
| ;     |                  |      |   |   |
| 23184 | 195.612976074219 | 0.03 | 1 |   |



|       |                  |      |   |   |   |
|-------|------------------|------|---|---|---|
| ;     |                  |      |   |   |   |
| 23185 | 195.07275390625  | 0.00 | 1 |   | ; |
| 23186 | 195.693634033203 | 0.03 |   | 1 |   |
| ;     |                  |      |   |   |   |
| 23187 | 197.694305419922 | 0.01 |   | 1 |   |
| ;     |                  |      |   |   |   |
| 23188 | 193.198806762695 | 0.00 |   | 1 |   |
| ;     |                  |      |   |   |   |
| 23189 | 194.204116821289 | 0.00 |   | 1 |   |
| ;     |                  |      |   |   |   |
| 23190 | 208.980133056641 | 0.03 |   | 1 |   |
| ;     |                  |      |   |   |   |
| 23191 | 229.191925048828 | 0.03 |   | 1 |   |
| ;     |                  |      |   |   |   |
| 23192 | 203.202056884766 | 0.02 |   | 1 |   |
| ;     |                  |      |   |   |   |
| 23193 | 203.0380859375   | 0.07 | 1 |   | ; |
| 23194 | 200.927154541016 | 0.01 |   | 1 |   |
| ;     |                  |      |   |   |   |
| 23195 | 217.222122192383 | 0.01 |   | 1 |   |
| ;     |                  |      |   |   |   |
| 23196 | 217.57356262207  | 0.03 | 1 |   | ; |
| 23197 | 200.394287109375 | 0.07 |   | 1 |   |
| ;     |                  |      |   |   |   |
| 23198 | 200.82551574707  | 0.08 | 1 |   | ; |
| 23199 | 200.804428100586 | 0.00 |   | 1 |   |
| ;     |                  |      |   |   |   |
| 23200 | 204.424560546875 | 0.02 |   | 1 |   |
| ;     |                  |      |   |   |   |
| 23201 | 233.571502685547 | 0.01 |   | 1 |   |
| ;     |                  |      |   |   |   |
| 23202 | 200              | 0.03 | 1 |   | ; |
| 23203 | 204.669189453125 | 0.01 |   | 1 |   |
| ;     |                  |      |   |   |   |
| 23204 | 203.062942504883 | 0.01 |   | 1 |   |
| ;     |                  |      |   |   |   |
| 23205 | 201.974075317383 | 0.07 |   | 1 |   |
| ;     |                  |      |   |   |   |
| 23206 | 201.930938720703 | 0.00 |   | 1 |   |
| ;     |                  |      |   |   |   |
| 23207 | 203.891616821289 | 0.01 |   | 1 |   |
| ;     |                  |      |   |   |   |
| 23208 | 204.730819702148 | 0.05 |   | 1 |   |
| ;     |                  |      |   |   |   |
| 23209 | 230.673599243164 | 0.03 |   | 1 |   |
| ;     |                  |      |   |   |   |
| 23210 | 230.968490600586 | 0.00 |   | 1 |   |
| ;     |                  |      |   |   |   |
| 23211 | 230.502288818359 | 0.01 |   | 1 |   |
| ;     |                  |      |   |   |   |

|       |                      |      |   |   |
|-------|----------------------|------|---|---|
| 23212 | 230.381378173828     | 0.00 | 1 |   |
| ;     |                      |      |   |   |
| 23213 | 231.636657714844     | 0.07 | 1 |   |
| ;     |                      |      |   |   |
| 23214 | 231.651062011719     | 0.00 | 1 |   |
| ;     |                      |      |   |   |
| 23215 | 236.734817504883     | 0.00 | 1 |   |
| ;     |                      |      |   |   |
| 23216 | 237.312469482422     | 0.00 | 1 |   |
| ;     |                      |      |   |   |
| 23217 | 218.150955200195     | 0.01 | 1 |   |
| ;     |                      |      |   |   |
| 23218 | 217.944732666016     | 0.02 | 1 |   |
| ;     |                      |      |   |   |
| 23219 | 218.163970947266     | 0.02 | 1 |   |
| ;     |                      |      |   |   |
| 23220 | 218.325149536133     | 0.01 | 1 |   |
| ;     |                      |      |   |   |
| 23221 | 206.996887207031     | 0.00 | 1 |   |
| ;     |                      |      |   |   |
| 23222 | 205.8955078125 0.00  |      | 1 |   |
| 23223 | 209.974914550781     | 0.09 | 1 | ; |
| ;     |                      |      |   |   |
| 23224 | 209.725601196289     | 0.03 | 1 |   |
| ;     |                      |      |   |   |
| 23225 | 210 0.01             |      | 1 | ; |
| 23226 | 210.71907043457 0.01 |      | 1 | ; |
| 23227 | 206.906875610352     | 0.05 | 1 |   |
| ;     |                      |      |   |   |
| 23228 | 206.706192016602     | 0.02 | 1 |   |
| ;     |                      |      |   |   |
| 23229 | 196.19580078125 0.00 |      | 1 | ; |
| 23230 | 194.663238525391     | 0.06 | 1 |   |
| ;     |                      |      |   |   |
| 23231 | 194.939086914063     | 0.02 | 1 |   |
| ;     |                      |      |   |   |
| 23232 | 194.573989868164     | 0.01 | 1 |   |
| ;     |                      |      |   |   |
| 23233 | 207.869750976563     | 0.07 | 1 |   |
| ;     |                      |      |   |   |
| 23234 | 208.001083374023     | 0.06 | 1 |   |
| ;     |                      |      |   |   |
| 23235 | 207.609924316406     | 0.04 | 1 |   |
| ;     |                      |      |   |   |
| 23236 | 207.592376708984     | 0.06 | 1 |   |
| ;     |                      |      |   |   |
| 23237 | 198.592025756836     | 0.02 | 1 |   |
| ;     |                      |      |   |   |
| 23238 | 211.332397460938     | 0.00 | 1 |   |
| ;     |                      |      |   |   |

|       |                  |      |   |   |   |
|-------|------------------|------|---|---|---|
| 23239 | 197.459747314453 | 0.01 |   | 1 |   |
| ;     |                  |      |   |   |   |
| 23240 | 219.69026184082  | 0.01 | 1 |   | ; |
| 23241 | 211.226287841797 | 0.05 |   | 1 |   |
| ;     |                  |      |   |   |   |
| 23242 | 214.919189453125 | 0.00 |   | 1 |   |
| ;     |                  |      |   |   |   |
| 23243 | 213.683013916016 | 0.08 |   | 1 |   |
| ;     |                  |      |   |   |   |
| 23244 | 213.853790283203 | 0.01 |   | 1 |   |
| ;     |                  |      |   |   |   |
| 23245 | 214.234771728516 | 0.06 |   | 1 |   |
| ;     |                  |      |   |   |   |
| 23246 | 213.579376220703 | 0.02 |   | 1 |   |
| ;     |                  |      |   |   |   |
| 23247 | 203.616394042969 | 0.03 |   | 1 |   |
| ;     |                  |      |   |   |   |
| 23248 | 200.370025634766 | 0.01 |   | 1 |   |
| ;     |                  |      |   |   |   |
| 23249 | 201.282287597656 | 0.01 |   | 1 |   |
| ;     |                  |      |   |   |   |
| 23250 | 200              | 0.01 | 1 |   | ; |
| 23251 | 200.968215942383 | 0.00 |   | 1 |   |
| ;     |                  |      |   |   |   |
| 23252 | 227.658721923828 | 0.03 |   | 1 |   |
| ;     |                  |      |   |   |   |
| 23253 | 206.813446044922 | 0.01 |   | 1 |   |
| ;     |                  |      |   |   |   |
| 23254 | 205              | 0.06 | 1 |   | ; |
| 23255 | 227.146545410156 | 0.03 |   | 1 |   |
| ;     |                  |      |   |   |   |
| 23256 | 202.397537231445 | 0.04 |   | 1 |   |
| ;     |                  |      |   |   |   |
| 23257 | 194.513641357422 | 0.11 |   | 1 |   |
| ;     |                  |      |   |   |   |
| 23258 | 195.199996948242 | 0.07 |   | 1 |   |
| ;     |                  |      |   |   |   |
| 23259 | 195.833450317383 | 0.04 |   | 1 |   |
| ;     |                  |      |   |   |   |
| 23260 | 212.820022583008 | 0.04 |   | 1 |   |
| ;     |                  |      |   |   |   |
| 23261 | 214.829605102539 | 0.01 |   | 1 |   |
| ;     |                  |      |   |   |   |
| 23262 | 215.868667602539 | 0.01 |   | 1 |   |
| ;     |                  |      |   |   |   |
| 23263 | 221.654602050781 | 0.00 |   | 1 |   |
| ;     |                  |      |   |   |   |
| 23264 | 221.69384765625  | 0.00 | 1 |   | ; |
| 23265 | 213.710693359375 | 0.03 |   | 1 |   |
| ;     |                  |      |   |   |   |

|       |                  |      |   |  |
|-------|------------------|------|---|--|
| 23266 | 197.473571777344 | 0.00 | 1 |  |
| ;     |                  |      |   |  |
| 23267 | 194.261871337891 | 0.01 | 1 |  |
| ;     |                  |      |   |  |
| 23268 | 194.671936035156 | 0.02 | 1 |  |
| ;     |                  |      |   |  |
| 23269 | 194.563232421875 | 0.00 | 1 |  |
| ;     |                  |      |   |  |
| 23270 | 210.447021484375 | 0.04 | 1 |  |
| ;     |                  |      |   |  |
| 23271 | 209.938812255859 | 0.00 | 1 |  |
| ;     |                  |      |   |  |
| 23272 | 210.027801513672 | 0.00 | 1 |  |
| ;     |                  |      |   |  |
| 23273 | 210.414428710938 | 0.02 | 1 |  |
| ;     |                  |      |   |  |
| 23274 | 208.856048583984 | 0.05 | 1 |  |
| ;     |                  |      |   |  |
| 23275 | 214.879516601563 | 0.06 | 1 |  |
| ;     |                  |      |   |  |
| 23276 | 214.532928466797 | 0.06 | 1 |  |
| ;     |                  |      |   |  |
| 23277 | 207.368911743164 | 0.09 | 1 |  |
| ;     |                  |      |   |  |
| 23278 | 201.545623779297 | 0.03 | 1 |  |
| ;     |                  |      |   |  |
| 23279 | 201.498016357422 | 0.05 | 1 |  |
| ;     |                  |      |   |  |
| 23280 | 201.378890991211 | 0.00 | 1 |  |
| ;     |                  |      |   |  |
| 23281 | 201.094604492188 | 0.00 | 1 |  |
| ;     |                  |      |   |  |
| 23282 | 201.040222167969 | 0.01 | 1 |  |
| ;     |                  |      |   |  |
| 23283 | 201.446716308594 | 0.00 | 1 |  |
| ;     |                  |      |   |  |
| 23284 | 201.660339355469 | 0.03 | 1 |  |
| ;     |                  |      |   |  |
| 23285 | 205.75617980957  | 0.01 | 1 |  |
| 23286 | 205.866928100586 | 0.02 | 1 |  |
| ;     |                  |      |   |  |
| 23287 | 210.990921020508 | 0.03 | 1 |  |
| ;     |                  |      |   |  |
| 23288 | 210.686752319336 | 0.04 | 1 |  |
| ;     |                  |      |   |  |
| 23289 | 209.775680541992 | 0.04 | 1 |  |
| ;     |                  |      |   |  |
| 23290 | 210.970794677734 | 0.05 | 1 |  |
| ;     |                  |      |   |  |
| 23291 | 210              | 0.05 | 1 |  |

|       |                  |      |   |   |  |  |
|-------|------------------|------|---|---|--|--|
| 23292 | 205              | 0.01 | 1 |   |  |  |
| 23293 | 212.317993164063 | 0.07 |   | 1 |  |  |
| ;     |                  |      |   |   |  |  |
| 23294 | 212.258544921875 | 0.01 |   | 1 |  |  |
| ;     |                  |      |   |   |  |  |
| 23295 | 208.995193481445 | 0.03 |   | 1 |  |  |
| ;     |                  |      |   |   |  |  |
| 23296 | 193.659927368164 | 0.02 |   | 1 |  |  |
| ;     |                  |      |   |   |  |  |
| 23297 | 193.656448364258 | 0.02 |   | 1 |  |  |
| ;     |                  |      |   |   |  |  |
| 23298 | 193.467681884766 | 0.00 |   | 1 |  |  |
| ;     |                  |      |   |   |  |  |
| 23299 | 195.942291259766 | 0.01 |   | 1 |  |  |
| ;     |                  |      |   |   |  |  |
| 23300 | 195.394058227539 | 0.01 |   | 1 |  |  |
| ;     |                  |      |   |   |  |  |
| 23301 | 195.980026245117 | 0.01 |   | 1 |  |  |
| ;     |                  |      |   |   |  |  |
| 23302 | 207.888107299805 | 0.07 |   | 1 |  |  |
| ;     |                  |      |   |   |  |  |
| 23303 | 215.923599243164 | 0.01 |   | 1 |  |  |
| ;     |                  |      |   |   |  |  |
| 23304 | 216.304794311523 | 0.01 |   | 1 |  |  |
| ;     |                  |      |   |   |  |  |
| 23305 | 217.7216796875   | 0.04 | 1 |   |  |  |
| 23306 | 209.697418212891 | 0.03 |   | 1 |  |  |
| ;     |                  |      |   |   |  |  |
| 23307 | 216.360412597656 | 0.03 |   | 1 |  |  |
| ;     |                  |      |   |   |  |  |
| 23308 | 214.23388671875  | 0.01 | 1 |   |  |  |
| 23309 | 201.380569458008 | 0.00 |   | 1 |  |  |
| ;     |                  |      |   |   |  |  |
| 23310 | 206.994918823242 | 0.01 |   | 1 |  |  |
| ;     |                  |      |   |   |  |  |
| 23311 | 207.522125244141 | 0.02 |   | 1 |  |  |
| ;     |                  |      |   |   |  |  |
| 23312 | 220              | 0.02 | 1 |   |  |  |
| 23313 | 196.265899658203 | 0.01 |   | 1 |  |  |
| ;     |                  |      |   |   |  |  |
| 23314 | 213.748016357422 | 0.01 |   | 1 |  |  |
| ;     |                  |      |   |   |  |  |
| 23315 | 213.770416259766 | 0.03 |   | 1 |  |  |
| ;     |                  |      |   |   |  |  |
| 23316 | 203.930770874023 | 0.10 |   | 1 |  |  |
| ;     |                  |      |   |   |  |  |
| 23317 | 202.156188964844 | 0.01 |   | 1 |  |  |
| ;     |                  |      |   |   |  |  |
| 23318 | 202.655700683594 | 0.01 |   | 1 |  |  |
| ;     |                  |      |   |   |  |  |

|       |                  |      |   |   |
|-------|------------------|------|---|---|
| 23319 | 203.164810180664 | 0.01 | 1 |   |
| ;     |                  |      |   |   |
| 23320 | 202.504241943359 | 0.02 | 1 |   |
| ;     |                  |      |   |   |
| 23321 | 202.111663818359 | 0.01 | 1 |   |
| ;     |                  |      |   |   |
| 23322 | 219.588989257812 | 0.02 | 1 |   |
| ;     |                  |      |   |   |
| 23323 | 210.294036865234 | 0.01 | 1 |   |
| ;     |                  |      |   |   |
| 23324 | 210.376678466797 | 0.01 | 1 |   |
| ;     |                  |      |   |   |
| 23325 | 201.145324707031 | 0.01 | 1 |   |
| ;     |                  |      |   |   |
| 23326 | 201.854431152344 | 0.03 | 1 |   |
| ;     |                  |      |   |   |
| 23327 | 200.530029296875 | 0.02 | 1 |   |
| ;     |                  |      |   |   |
| 23328 | 200.402923583984 | 0.06 | 1 |   |
| ;     |                  |      |   |   |
| 23329 | 201.324630737305 | 0.08 | 1 |   |
| ;     |                  |      |   |   |
| 23330 | 200.883590698242 | 0.02 | 1 |   |
| ;     |                  |      |   |   |
| 23331 | 207.907012939453 | 0.00 | 1 |   |
| ;     |                  |      |   |   |
| 23332 | 208.003890991211 | 0.00 | 1 |   |
| ;     |                  |      |   |   |
| 23333 | 207.184341430664 | 0.01 | 1 |   |
| ;     |                  |      |   |   |
| 23334 | 207.127319335938 | 0.02 | 1 |   |
| ;     |                  |      |   |   |
| 23335 | 208.146148681641 | 0.00 | 1 |   |
| ;     |                  |      |   |   |
| 23336 | 207.198547363281 | 0.01 | 1 |   |
| ;     |                  |      |   |   |
| 23337 | 199.604843139648 | 0.02 | 1 |   |
| ;     |                  |      |   |   |
| 23338 | 199.973541259766 | 0.01 | 1 |   |
| ;     |                  |      |   |   |
| 23339 | 199.291534423828 | 0.01 | 1 |   |
| ;     |                  |      |   |   |
| 23340 | 199.574890136719 | 0.01 | 1 |   |
| ;     |                  |      |   |   |
| 23341 | 200.318740844727 | 0.00 | 1 |   |
| ;     |                  |      |   |   |
| 23342 | 200.307678222656 | 0.01 | 1 |   |
| ;     |                  |      |   |   |
| 23343 | 211.0205078125   | 0.11 | 1 |   |
| 23344 | 211.388381958008 | 0.01 | 1 | ; |

|       |                      |      |   |   |   |
|-------|----------------------|------|---|---|---|
| ;     |                      |      |   |   |   |
| 23345 | 210.942855834961     | 0.01 |   | 1 |   |
| ;     |                      |      |   |   |   |
| 23346 | 209.826919555664     | 0.00 |   | 1 |   |
| ;     |                      |      |   |   |   |
| 23347 | 212.81721496582 0.02 |      | 1 |   | ; |
| 23348 | 199.62565612793 0.04 |      | 1 |   | ; |
| 23349 | 206.041107177734     | 0.00 |   | 1 |   |
| ;     |                      |      |   |   |   |
| 23350 | 206.057159423828     | 0.00 |   | 1 |   |
| ;     |                      |      |   |   |   |
| 23351 | 205.749984741211     | 0.00 |   | 1 |   |
| ;     |                      |      |   |   |   |
| 23352 | 205.998229980469     | 0.03 |   | 1 |   |
| ;     |                      |      |   |   |   |
| 23353 | 200.389144897461     | 0.00 |   | 1 |   |
| ;     |                      |      |   |   |   |
| 23354 | 203.097839355469     | 0.00 |   | 1 |   |
| ;     |                      |      |   |   |   |
| 23355 | 203.262420654297     | 0.00 |   | 1 |   |
| ;     |                      |      |   |   |   |
| 23356 | 204.163116455078     | 0.00 |   | 1 |   |
| ;     |                      |      |   |   |   |
| 23357 | 218.861526489258     | 0.00 |   | 1 |   |
| ;     |                      |      |   |   |   |
| 23358 | 202.293716430664     | 0.01 |   | 1 |   |
| ;     |                      |      |   |   |   |
| 23359 | 201.071273803711     | 0.02 |   | 1 |   |
| ;     |                      |      |   |   |   |
| 23360 | 204.541107177734     | 0.06 |   | 1 |   |
| ;     |                      |      |   |   |   |
| 23361 | 201.208053588867     | 0.35 |   | 1 |   |
| ;     |                      |      |   |   |   |
| 23362 | 200.727096557617     | 0.28 |   | 1 |   |
| ;     |                      |      |   |   |   |
| 23363 | 201.64680480957 0.00 |      | 1 |   | ; |
| 23364 | 196.26921081543 0.02 |      | 1 |   | ; |
| 23365 | 196.277648925781     | 0.02 |   | 1 |   |
| ;     |                      |      |   |   |   |
| 23366 | 195.957550048828     | 0.01 |   | 1 |   |
| ;     |                      |      |   |   |   |
| 23367 | 196.268768310547     | 0.01 |   | 1 |   |
| ;     |                      |      |   |   |   |
| 23368 | 195.726837158203     | 0.03 |   | 1 |   |
| ;     |                      |      |   |   |   |
| 23369 | 196.263671875 0.03   |      | 1 |   | ; |
| 23370 | 195.966903686523     | 0.02 |   | 1 |   |
| ;     |                      |      |   |   |   |
| 23371 | 196.342559814453     | 0.03 |   | 1 |   |
| ;     |                      |      |   |   |   |

|       |                  |      |   |  |
|-------|------------------|------|---|--|
| 23372 | 195.996292114258 | 0.01 | 1 |  |
| ;     |                  |      |   |  |
| 23373 | 198.063751220703 | 0.05 | 1 |  |
| ;     |                  |      |   |  |
| 23374 | 196.407592773438 | 0.00 | 1 |  |
| ;     |                  |      |   |  |
| 23375 | 196.614791870117 | 0.01 | 1 |  |
| ;     |                  |      |   |  |
| 23376 | 196.815185546875 | 0.02 | 1 |  |
| ;     |                  |      |   |  |
| 23377 | 196.898818969727 | 0.01 | 1 |  |
| ;     |                  |      |   |  |
| 23378 | 195.76335144043  | 0.00 | 1 |  |
| 23379 | 198.756454467773 | 0.02 | 1 |  |
| ;     |                  |      |   |  |
| 23380 | 195.304138183594 | 0.03 | 1 |  |
| ;     |                  |      |   |  |
| 23381 | 195.848480224609 | 0.05 | 1 |  |
| ;     |                  |      |   |  |
| 23382 | 196.172729492188 | 0.02 | 1 |  |
| ;     |                  |      |   |  |
| 23383 | 195.861587524414 | 0.04 | 1 |  |
| ;     |                  |      |   |  |
| 23384 | 197.481719970703 | 0.11 | 1 |  |
| ;     |                  |      |   |  |
| 23385 | 202.183517456055 | 0.04 | 1 |  |
| ;     |                  |      |   |  |
| 23386 | 201.423812866211 | 0.03 | 1 |  |
| ;     |                  |      |   |  |
| 23387 | 201.871307373047 | 0.01 | 1 |  |
| ;     |                  |      |   |  |
| 23388 | 201.886032104492 | 0.04 | 1 |  |
| ;     |                  |      |   |  |
| 23389 | 207.520126342773 | 0.00 | 1 |  |
| ;     |                  |      |   |  |
| 23390 | 207.498901367188 | 0.07 | 1 |  |
| ;     |                  |      |   |  |
| 23391 | 206.12060546875  | 0.05 | 1 |  |
| 23392 | 205.584533691406 | 0.02 | 1 |  |
| ;     |                  |      |   |  |
| 23393 | 206.214721679688 | 0.02 | 1 |  |
| ;     |                  |      |   |  |
| 23394 | 206.291046142578 | 0.02 | 1 |  |
| ;     |                  |      |   |  |
| 23395 | 208.740570068359 | 0.06 | 1 |  |
| ;     |                  |      |   |  |
| 23396 | 208.699356079102 | 0.01 | 1 |  |
| ;     |                  |      |   |  |
| 23397 | 209.109786987305 | 0.01 | 1 |  |
| ;     |                  |      |   |  |



|       |                  |      |   |   |
|-------|------------------|------|---|---|
| 23398 | 208.821899414063 | 0.03 | 1 |   |
| ;     |                  |      |   |   |
| 23399 | 208.485656738281 | 0.02 | 1 |   |
| ;     |                  |      |   |   |
| 23400 | 211.303115844727 | 0.10 | 1 |   |
| ;     |                  |      |   |   |
| 23401 | 211.493988037109 | 0.01 | 1 |   |
| ;     |                  |      |   |   |
| 23402 | 210.884078979492 | 0.04 | 1 |   |
| ;     |                  |      |   |   |
| 23403 | 209.008590698242 | 0.02 | 1 |   |
| ;     |                  |      |   |   |
| 23404 | 209.685394287109 | 0.00 | 1 |   |
| ;     |                  |      |   |   |
| 23405 | 209.822662353516 | 0.00 | 1 |   |
| ;     |                  |      |   |   |
| 23406 | 209.254547119141 | 0.04 | 1 |   |
| ;     |                  |      |   |   |
| 23407 | 209.486892700195 | 0.04 | 1 |   |
| ;     |                  |      |   |   |
| 23408 | 199.443984985352 | 0.00 | 1 |   |
| ;     |                  |      |   |   |
| 23409 | 203.441192626953 | 0.00 | 1 |   |
| ;     |                  |      |   |   |
| 23410 | 203.335540771484 | 0.00 | 1 |   |
| ;     |                  |      |   |   |
| 23411 | 198.410369873047 | 0.01 | 1 |   |
| ;     |                  |      |   |   |
| 23412 | 202.807189941406 | 0.01 | 1 |   |
| ;     |                  |      |   |   |
| 23413 | 203.2822265625   | 0.01 | 1 | ; |
| 23414 | 206.021347045898 | 0.01 | 1 |   |
| ;     |                  |      |   |   |
| 23415 | 212.363235473633 | 0.03 | 1 |   |
| ;     |                  |      |   |   |
| 23416 | 212.37043762207  | 0.02 | 1 | ; |
| 23417 | 212.942733764648 | 0.01 | 1 |   |
| ;     |                  |      |   |   |
| 23418 | 213.72883605957  | 0.00 | 1 | ; |
| 23419 | 199.960189819336 | 0.06 | 1 |   |
| ;     |                  |      |   |   |
| 23420 | 199.351516723633 | 0.03 | 1 |   |
| ;     |                  |      |   |   |
| 23421 | 199.810684204102 | 0.03 | 1 |   |
| ;     |                  |      |   |   |
| 23422 | 200.153335571289 | 0.00 | 1 |   |
| ;     |                  |      |   |   |
| 23423 | 200.027542114258 | 0.02 | 1 |   |
| ;     |                  |      |   |   |
| 23424 | 200.166595458984 | 0.05 | 1 |   |

|       |                  |      |   |   |   |
|-------|------------------|------|---|---|---|
| ;     |                  |      |   |   |   |
| 23425 | 214.810165405273 | 0.01 |   | 1 |   |
| ;     |                  |      |   |   |   |
| 23426 | 208.16096496582  | 0.03 | 1 |   | ; |
| 23427 | 208.439086914063 | 0.03 |   | 1 |   |
| ;     |                  |      |   |   |   |
| 23428 | 205.261199951172 | 0.01 |   | 1 |   |
| ;     |                  |      |   |   |   |
| 23429 | 204.549682617188 | 0.00 |   | 1 |   |
| ;     |                  |      |   |   |   |
| 23430 | 228.572067260742 | 0.01 |   | 1 |   |
| ;     |                  |      |   |   |   |
| 23431 | 203.417587280273 | 0.04 |   | 1 |   |
| ;     |                  |      |   |   |   |
| 23432 | 203.755523681641 | 0.02 |   | 1 |   |
| ;     |                  |      |   |   |   |
| 23433 | 203.409301757813 | 0.02 |   | 1 |   |
| ;     |                  |      |   |   |   |
| 23434 | 229.482650756836 | 0.00 |   | 1 |   |
| ;     |                  |      |   |   |   |
| 23435 | 230.148635864258 | 0.07 |   | 1 |   |
| ;     |                  |      |   |   |   |
| 23436 | 230.160125732422 | 0.01 |   | 1 |   |
| ;     |                  |      |   |   |   |
| 23437 | 203.067092895508 | 0.01 |   | 1 |   |
| ;     |                  |      |   |   |   |
| 23438 | 202.421432495117 | 0.07 |   | 1 |   |
| ;     |                  |      |   |   |   |
| 23439 | 204.061584472656 | 0.09 |   | 1 |   |
| ;     |                  |      |   |   |   |
| 23440 | 221.129241943359 | 0.04 |   | 1 |   |
| ;     |                  |      |   |   |   |
| 23441 | 221.174087524414 | 0.02 |   | 1 |   |
| ;     |                  |      |   |   |   |
| 23442 | 220.643646240234 | 0.01 |   | 1 |   |
| ;     |                  |      |   |   |   |
| 23443 | 200              | 0.01 | 1 |   | ; |
| 23444 | 200              | 0.01 | 1 |   | ; |
| 23445 | 200              | 0.02 | 1 |   | ; |
| 23446 | 231.910293579102 | 0.05 |   | 1 |   |
| ;     |                  |      |   |   |   |
| 23447 | 201.139465332031 | 0.04 |   | 1 |   |
| ;     |                  |      |   |   |   |
| 23448 | 201.711380004883 | 0.02 |   | 1 |   |
| ;     |                  |      |   |   |   |
| 23449 | 201.11962890625  | 0.05 | 1 |   | ; |
| 23450 | 200.346466064453 | 0.00 |   | 1 |   |
| ;     |                  |      |   |   |   |
| 23451 | 200.279418945313 | 0.02 |   | 1 |   |
| ;     |                  |      |   |   |   |

|       |                  |      |   |   |
|-------|------------------|------|---|---|
| 23452 | 201.226531982422 | 0.00 | 1 |   |
| ;     |                  |      |   |   |
| 23453 | 201.787048339844 | 0.00 | 1 |   |
| ;     |                  |      |   |   |
| 23454 | 216.519439697266 | 0.02 | 1 |   |
| ;     |                  |      |   |   |
| 23455 | 216.020278930664 | 0.02 | 1 |   |
| ;     |                  |      |   |   |
| 23456 | 197.568450927734 | 0.02 | 1 |   |
| ;     |                  |      |   |   |
| 23457 | 197.69987487793  | 0.02 | 1 |   |
| 23458 | 216.526107788086 | 0.02 | 1 | ; |
| ;     |                  |      |   |   |
| 23459 | 216.675506591797 | 0.00 | 1 |   |
| ;     |                  |      |   |   |
| 23460 | 207.853439331055 | 0.01 | 1 |   |
| ;     |                  |      |   |   |
| 23461 | 207.966445922852 | 0.09 | 1 |   |
| ;     |                  |      |   |   |
| 23462 | 197.769882202148 | 0.00 | 1 |   |
| ;     |                  |      |   |   |
| 23463 | 210.787353515625 | 0.00 | 1 |   |
| ;     |                  |      |   |   |
| 23464 | 210.668579101563 | 0.00 | 1 |   |
| ;     |                  |      |   |   |
| 23465 | 208.518844604492 | 0.00 | 1 |   |
| ;     |                  |      |   |   |
| 23466 | 208.396926879883 | 0.00 | 1 |   |
| ;     |                  |      |   |   |
| 23467 | 208.112380981445 | 0.09 | 1 |   |
| ;     |                  |      |   |   |
| 23468 | 208.37434387207  | 0.02 | 1 |   |
| 23469 | 208.524047851563 | 0.04 | 1 | ; |
| ;     |                  |      |   |   |
| 23470 | 195.991409301758 | 0.00 | 1 |   |
| ;     |                  |      |   |   |
| 23471 | 195.60807800293  | 0.16 | 1 |   |
| 23472 | 214.651565551758 | 0.00 | 1 | ; |
| ;     |                  |      |   |   |
| 23473 | 211.462753295898 | 0.01 | 1 |   |
| ;     |                  |      |   |   |
| 23474 | 196.275207519531 | 0.01 | 1 |   |
| ;     |                  |      |   |   |
| 23475 | 217.855758666992 | 0.02 | 1 |   |
| ;     |                  |      |   |   |
| 23476 | 218.043502807617 | 0.02 | 1 |   |
| ;     |                  |      |   |   |
| 23477 | 209.785186767578 | 0.04 | 1 |   |
| ;     |                  |      |   |   |
| 23478 | 210.016891479492 | 0.02 | 1 |   |

|       |                  |      |   |   |   |
|-------|------------------|------|---|---|---|
| ;     |                  |      |   |   |   |
| 23479 | 210.063613891602 | 0.00 |   | 1 |   |
| ;     |                  |      |   |   |   |
| 23480 | 209.914367675781 | 0.10 |   | 1 |   |
| ;     |                  |      |   |   |   |
| 23481 | 199.58366394043  | 0.01 | 1 |   | ; |
| 23482 | 205              | 0.02 | 1 |   | ; |
| 23483 | 202.21354675293  | 0.00 | 1 |   | ; |
| 23484 | 205              | 0.01 | 1 |   | ; |
| 23485 | 205              | 0.01 | 1 |   | ; |
| 23486 | 206.512588500977 | 0.04 |   | 1 |   |
| ;     |                  |      |   |   |   |
| 23487 | 206.321136474609 | 0.02 |   | 1 |   |
| ;     |                  |      |   |   |   |
| 23488 | 205.824768066406 | 0.01 |   | 1 |   |
| ;     |                  |      |   |   |   |
| 23489 | 206.141479492188 | 0.01 |   | 1 |   |
| ;     |                  |      |   |   |   |
| 23490 | 200.276397705078 | 0.02 |   | 1 |   |
| ;     |                  |      |   |   |   |
| 23491 | 201.225067138672 | 0.05 |   | 1 |   |
| ;     |                  |      |   |   |   |
| 23492 | 201.431930541992 | 0.01 |   | 1 |   |
| ;     |                  |      |   |   |   |
| 23493 | 209.090972900391 | 0.01 |   | 1 |   |
| ;     |                  |      |   |   |   |
| 23494 | 208.937072753906 | 0.01 |   | 1 |   |
| ;     |                  |      |   |   |   |
| 23495 | 202.04182434082  | 0.03 | 1 |   | ; |
| 23496 | 202.75617980957  | 0.03 | 1 |   | ; |
| 23497 | 229.519104003906 | 0.08 |   | 1 |   |
| ;     |                  |      |   |   |   |
| 23498 | 199.74365234375  | 0.05 | 1 |   | ; |
| 23499 | 207.593734741211 | 0.04 |   | 1 |   |
| ;     |                  |      |   |   |   |
| 23500 | 207.563415527344 | 0.00 |   | 1 |   |
| ;     |                  |      |   |   |   |
| 23501 | 199.960952758789 | 0.00 |   | 1 |   |
| ;     |                  |      |   |   |   |
| 23502 | 200.014221191406 | 0.00 |   | 1 |   |
| ;     |                  |      |   |   |   |
| 23503 | 206.020980834961 | 0.06 |   | 1 |   |
| ;     |                  |      |   |   |   |
| 23504 | 228.541030883789 | 0.08 |   | 1 |   |
| ;     |                  |      |   |   |   |
| 23505 | 229.635223388672 | 0.02 |   | 1 |   |
| ;     |                  |      |   |   |   |
| 23506 | 202.192169189453 | 0.02 |   | 1 |   |
| ;     |                  |      |   |   |   |
| 23507 | 202.598236083984 | 0.01 |   | 1 |   |

|       |                  |      |   |   |   |
|-------|------------------|------|---|---|---|
| ;     |                  |      |   |   |   |
| 23508 | 196.746353149414 | 0.01 |   | 1 |   |
| ;     |                  |      |   |   |   |
| 23509 | 196.542221069336 | 0.00 |   | 1 |   |
| ;     |                  |      |   |   |   |
| 23510 | 201.706161499023 | 0.00 |   | 1 |   |
| ;     |                  |      |   |   |   |
| 23511 | 213.879272460938 | 0.02 |   | 1 |   |
| ;     |                  |      |   |   |   |
| 23512 | 213.679626464844 | 0.02 |   | 1 |   |
| ;     |                  |      |   |   |   |
| 23513 | 198.546493530273 | 0.04 |   | 1 |   |
| ;     |                  |      |   |   |   |
| 23514 | 206.410293579102 | 0.06 |   | 1 |   |
| ;     |                  |      |   |   |   |
| 23515 | 213.334762573242 | 0.00 |   | 1 |   |
| ;     |                  |      |   |   |   |
| 23516 | 213.030548095703 | 0.02 |   | 1 |   |
| ;     |                  |      |   |   |   |
| 23517 | 213.475997924805 | 0.01 |   | 1 |   |
| ;     |                  |      |   |   |   |
| 23518 | 213.813369750977 | 0.13 |   | 1 |   |
| ;     |                  |      |   |   |   |
| 23519 | 211.814575195313 | 0.02 |   | 1 |   |
| ;     |                  |      |   |   |   |
| 23520 | 212.379760742188 | 0.03 |   | 1 |   |
| ;     |                  |      |   |   |   |
| 23521 | 193.886444091797 | 0.05 |   | 1 |   |
| ;     |                  |      |   |   |   |
| 23522 | 193.215774536133 | 0.05 |   | 1 |   |
| ;     |                  |      |   |   |   |
| 23523 | 207.334060668945 | 0.02 |   | 1 |   |
| ;     |                  |      |   |   |   |
| 23524 | 208.41325378418  | 0.05 | 1 |   | ; |
| 23525 | 217.374496459961 | 0.06 |   | 1 |   |
| ;     |                  |      |   |   |   |
| 23526 | 218.966781616211 | 0.00 |   | 1 |   |
| ;     |                  |      |   |   |   |
| 23527 | 219.105529785156 | 0.01 |   | 1 |   |
| ;     |                  |      |   |   |   |
| 23528 | 215.619415283203 | 0.00 |   | 1 |   |
| ;     |                  |      |   |   |   |
| 23529 | 208.209320068359 | 0.01 |   | 1 |   |
| ;     |                  |      |   |   |   |
| 23530 | 208.1513671875   | 0.01 | 1 |   | ; |
| 23531 | 216.373092651367 | 0.03 |   | 1 |   |
| ;     |                  |      |   |   |   |
| 23532 | 215.79264831543  | 0.02 | 1 |   | ; |
| 23533 | 206.35075378418  | 0.03 | 1 |   | ; |
| 23534 | 206.388320922852 | 0.03 |   | 1 |   |

|       |                  |      |   |   |   |
|-------|------------------|------|---|---|---|
| ;     |                  |      |   |   |   |
| 23535 | 198.239196777344 | 0.01 |   | 1 |   |
| ;     |                  |      |   |   |   |
| 23536 | 211.418411254883 | 0.02 |   | 1 |   |
| ;     |                  |      |   |   |   |
| 23537 | 212.785842895508 | 0.09 |   | 1 |   |
| ;     |                  |      |   |   |   |
| 23538 | 215.979125976563 | 0.02 |   | 1 |   |
| ;     |                  |      |   |   |   |
| 23539 | 215.775863647461 | 0.04 |   | 1 |   |
| ;     |                  |      |   |   |   |
| 23540 | 215.965545654297 | 0.02 |   | 1 |   |
| ;     |                  |      |   |   |   |
| 23541 | 207.241333007813 | 0.00 |   | 1 |   |
| ;     |                  |      |   |   |   |
| 23542 | 207.219802856445 | 0.03 |   | 1 |   |
| ;     |                  |      |   |   |   |
| 23543 | 207.305023193359 | 0.00 |   | 1 |   |
| ;     |                  |      |   |   |   |
| 23544 | 209.091873168945 | 0.00 |   | 1 |   |
| ;     |                  |      |   |   |   |
| 23545 | 200.048233032227 | 0.03 |   | 1 |   |
| ;     |                  |      |   |   |   |
| 23546 | 213.062683105469 | 0.01 |   | 1 |   |
| ;     |                  |      |   |   |   |
| 23547 | 215              | 0.02 | 1 |   | ; |
| 23548 | 206.074523925781 | 0.04 |   | 1 |   |
| ;     |                  |      |   |   |   |
| 23549 | 206.819381713867 | 0.02 |   | 1 |   |
| ;     |                  |      |   |   |   |
| 23550 | 218.697860717773 | 0.00 |   | 1 |   |
| ;     |                  |      |   |   |   |
| 23551 | 218.636596679688 | 0.04 |   | 1 |   |
| ;     |                  |      |   |   |   |
| 23552 | 219.203994750977 | 0.01 |   | 1 |   |
| ;     |                  |      |   |   |   |
| 23553 | 219.002822875977 | 0.11 |   | 1 |   |
| ;     |                  |      |   |   |   |
| 23554 | 218.544921875    | 0.01 | 1 |   | ; |
| 23555 | 218.709823608398 | 0.00 |   | 1 |   |
| ;     |                  |      |   |   |   |
| 23556 | 218.778579711914 | 0.00 |   | 1 |   |
| ;     |                  |      |   |   |   |
| 23557 | 218.887329101563 | 0.01 |   | 1 |   |
| ;     |                  |      |   |   |   |
| 23558 | 218.95881652832  | 0.01 | 1 |   | ; |
| 23559 | 200.533111572266 | 0.02 |   | 1 |   |
| ;     |                  |      |   |   |   |
| 23560 | 200.471221923828 | 0.02 |   | 1 |   |
| ;     |                  |      |   |   |   |

|       |                      |      |   |   |
|-------|----------------------|------|---|---|
| 23561 | 200.490386962891     | 0.01 | 1 |   |
| ;     |                      |      |   |   |
| 23562 | 201.155471801758     | 0.02 | 1 |   |
| ;     |                      |      |   |   |
| 23563 | 209.508056640625     | 0.01 | 1 |   |
| ;     |                      |      |   |   |
| 23564 | 208.94660949707 0.01 |      | 1 | ; |
| 23565 | 197.182556152344     | 0.07 | 1 |   |
| ;     |                      |      |   |   |
| 23566 | 197.194442749023     | 0.05 | 1 |   |
| ;     |                      |      |   |   |
| 23567 | 197.762710571289     | 0.01 | 1 |   |
| ;     |                      |      |   |   |
| 23568 | 204.332870483398     | 0.13 | 1 |   |
| ;     |                      |      |   |   |
| 23569 | 199.759796142578     | 0.06 | 1 |   |
| ;     |                      |      |   |   |
| 23570 | 199.798553466797     | 0.00 | 1 |   |
| ;     |                      |      |   |   |
| 23571 | 204.303680419922     | 0.00 | 1 |   |
| ;     |                      |      |   |   |
| 23572 | 204.341995239258     | 0.03 | 1 |   |
| ;     |                      |      |   |   |
| 23573 | 204.435623168945     | 0.02 | 1 |   |
| ;     |                      |      |   |   |
| 23574 | 204.606735229492     | 0.01 | 1 |   |
| ;     |                      |      |   |   |
| 23575 | 204.148666381836     | 0.01 | 1 |   |
| ;     |                      |      |   |   |
| 23576 | 201.269607543945     | 0.02 | 1 |   |
| ;     |                      |      |   |   |
| 23577 | 201.949371337891     | 0.02 | 1 |   |
| ;     |                      |      |   |   |
| 23578 | 206.243057250977     | 0.02 | 1 |   |
| ;     |                      |      |   |   |
| 23579 | 206.211700439453     | 0.02 | 1 |   |
| ;     |                      |      |   |   |
| 23580 | 197.454254150391     | 0.00 | 1 |   |
| ;     |                      |      |   |   |
| 23581 | 211.83332824707 0.02 |      | 1 | ; |
| 23582 | 204.470184326172     | 0.01 | 1 |   |
| ;     |                      |      |   |   |
| 23583 | 205.40251159668 0.07 |      | 1 | ; |
| 23584 | 205.34733581543 0.03 |      | 1 | ; |
| 23585 | 204.423583984375     | 0.00 | 1 |   |
| ;     |                      |      |   |   |
| 23586 | 202.609313964844     | 0.01 | 1 |   |
| ;     |                      |      |   |   |
| 23587 | 202.604156494141     | 0.03 | 1 |   |
| ;     |                      |      |   |   |

|       |                  |      |   |   |
|-------|------------------|------|---|---|
| 23588 | 204.190536499023 | 0.00 | 1 |   |
| ;     |                  |      |   |   |
| 23589 | 205.747253417969 | 0.01 | 1 |   |
| ;     |                  |      |   |   |
| 23590 | 205.297912597656 | 0.00 | 1 |   |
| ;     |                  |      |   |   |
| 23591 | 205.587265014648 | 0.00 | 1 |   |
| ;     |                  |      |   |   |
| 23592 | 208.001754760742 | 0.00 | 1 |   |
| ;     |                  |      |   |   |
| 23593 | 208.038299560547 | 0.01 | 1 |   |
| ;     |                  |      |   |   |
| 23594 | 200              | 0.01 | 1 |   |
| 23595 | 203.343948364258 | 0.02 | 1 | ; |
| ;     |                  |      |   |   |
| 23596 | 232.629013061523 | 0.11 | 1 |   |
| ;     |                  |      |   |   |
| 23597 | 218.181015014648 | 0.01 | 1 |   |
| ;     |                  |      |   |   |
| 23598 | 218.141311645508 | 0.01 | 1 |   |
| ;     |                  |      |   |   |
| 23599 | 218.451614379883 | 0.01 | 1 |   |
| ;     |                  |      |   |   |
| 23600 | 218.451889038086 | 0.01 | 1 |   |
| ;     |                  |      |   |   |
| 23601 | 209.413040161133 | 0.07 | 1 |   |
| ;     |                  |      |   |   |
| 23602 | 210.208862304688 | 0.00 | 1 |   |
| ;     |                  |      |   |   |
| 23603 | 209.885894775391 | 0.00 | 1 |   |
| ;     |                  |      |   |   |
| 23604 | 209.852264404297 | 0.00 | 1 |   |
| ;     |                  |      |   |   |
| 23605 | 209.745712280273 | 0.03 | 1 |   |
| ;     |                  |      |   |   |
| 23606 | 210.639495849609 | 0.01 | 1 |   |
| ;     |                  |      |   |   |
| 23607 | 210.401794433594 | 0.01 | 1 |   |
| ;     |                  |      |   |   |
| 23608 | 207.419799804687 | 0.06 | 1 |   |
| ;     |                  |      |   |   |
| 23609 | 208.347351074219 | 0.05 | 1 |   |
| ;     |                  |      |   |   |
| 23610 | 207.573196411133 | 0.05 | 1 |   |
| ;     |                  |      |   |   |
| 23611 | 208.336380004883 | 0.05 | 1 |   |
| ;     |                  |      |   |   |
| 23612 | 215.476470947266 | 0.03 | 1 |   |
| ;     |                  |      |   |   |
| 23613 | 215.358108520508 | 0.00 | 1 |   |



|       |                      |      |   |   |   |
|-------|----------------------|------|---|---|---|
| ;     |                      |      |   |   |   |
| 23614 | 215.572311401367     | 0.00 |   | 1 |   |
| ;     |                      |      |   |   |   |
| 23615 | 215.70393371582 0.01 |      | 1 |   | ; |
| 23616 | 216.104934692383     | 0.02 |   | 1 |   |
| ;     |                      |      |   |   |   |
| 23617 | 215.889099121094     | 0.02 |   | 1 |   |
| ;     |                      |      |   |   |   |
| 23618 | 217.369857788086     | 0.01 |   | 1 |   |
| ;     |                      |      |   |   |   |
| 23619 | 206.236404418945     | 0.05 |   | 1 |   |
| ;     |                      |      |   |   |   |
| 23620 | 206.343063354492     | 0.01 |   | 1 |   |
| ;     |                      |      |   |   |   |
| 23621 | 206.63818359375 0.03 |      | 1 |   | ; |
| 23622 | 206.25407409668 0.01 |      | 1 |   | ; |
| 23623 | 209.972366333008     | 0.06 |   | 1 |   |
| ;     |                      |      |   |   |   |
| 23624 | 209.980255126953     | 0.00 |   | 1 |   |
| ;     |                      |      |   |   |   |
| 23625 | 219.199798583984     | 0.02 |   | 1 |   |
| ;     |                      |      |   |   |   |
| 23626 | 219.57145690918 0.02 |      | 1 |   | ; |
| 23627 | 219.701904296875     | 0.04 |   | 1 |   |
| ;     |                      |      |   |   |   |
| 23628 | 219.975601196289     | 0.03 |   | 1 |   |
| ;     |                      |      |   |   |   |
| 23629 | 206.778930664063     | 0.01 |   | 1 |   |
| ;     |                      |      |   |   |   |
| 23630 | 195.213485717773     | 0.01 |   | 1 |   |
| ;     |                      |      |   |   |   |
| 23631 | 195.758804321289     | 0.01 |   | 1 |   |
| ;     |                      |      |   |   |   |
| 23632 | 197.144119262695     | 0.01 |   | 1 |   |
| ;     |                      |      |   |   |   |
| 23633 | 197.975875854492     | 0.04 |   | 1 |   |
| ;     |                      |      |   |   |   |
| 23634 | 196.75080871582 0.04 |      | 1 |   | ; |
| 23635 | 195.385208129883     | 0.00 |   | 1 |   |
| ;     |                      |      |   |   |   |
| 23636 | 218.153305053711     | 0.00 |   | 1 |   |
| ;     |                      |      |   |   |   |
| 23637 | 208.830200195313     | 0.04 |   | 1 |   |
| ;     |                      |      |   |   |   |
| 23638 | 206.510665893555     | 0.00 |   | 1 |   |
| ;     |                      |      |   |   |   |
| 23639 | 234.388229370117     | 0.02 |   | 1 |   |
| ;     |                      |      |   |   |   |
| 23640 | 204.907653808594     | 0.03 |   | 1 |   |
| ;     |                      |      |   |   |   |

|       |                  |      |   |   |
|-------|------------------|------|---|---|
| 23641 | 208.410537719727 | 0.02 | 1 |   |
| ;     |                  |      |   |   |
| 23642 | 208.212524414063 | 0.10 | 1 |   |
| ;     |                  |      |   |   |
| 23643 | 199.209503173828 | 0.00 | 1 |   |
| ;     |                  |      |   |   |
| 23644 | 205.759628295898 | 0.09 | 1 |   |
| ;     |                  |      |   |   |
| 23645 | 199.267059326172 | 0.01 | 1 |   |
| ;     |                  |      |   |   |
| 23646 | 206.272338867188 | 0.00 | 1 |   |
| ;     |                  |      |   |   |
| 23647 | 200              | 0.07 | 1 |   |
| 23648 | 203.267105102539 | 0.00 | 1 | ; |
| ;     |                  |      |   |   |
| 23649 | 211.288238525391 | 0.02 | 1 |   |
| ;     |                  |      |   |   |
| 23650 | 203.888366699219 | 0.01 | 1 |   |
| ;     |                  |      |   |   |
| 23651 | 203.845886230469 | 0.00 | 1 |   |
| ;     |                  |      |   |   |
| 23652 | 203.500534057617 | 0.01 | 1 |   |
| ;     |                  |      |   |   |
| 23653 | 214.847534179688 | 0.02 | 1 |   |
| ;     |                  |      |   |   |
| 23654 | 214.708068847656 | 0.02 | 1 |   |
| ;     |                  |      |   |   |
| 23655 | 216.143630981445 | 0.00 | 1 |   |
| ;     |                  |      |   |   |
| 23656 | 216.376831054688 | 0.01 | 1 |   |
| ;     |                  |      |   |   |
| 23657 | 207.091354370117 | 0.03 | 1 |   |
| ;     |                  |      |   |   |
| 23658 | 206.738388061523 | 0.03 | 1 |   |
| ;     |                  |      |   |   |
| 23659 | 206.056716918945 | 0.01 | 1 |   |
| ;     |                  |      |   |   |
| 23660 | 205.170516967773 | 0.03 | 1 |   |
| ;     |                  |      |   |   |
| 23661 | 196.299743652344 | 0.01 | 1 |   |
| ;     |                  |      |   |   |
| 23662 | 196.25862121582  | 0.02 | 1 |   |
| 23663 | 208.251449584961 | 0.03 | 1 | ; |
| ;     |                  |      |   |   |
| 23664 | 208.706787109375 | 0.04 | 1 |   |
| ;     |                  |      |   |   |
| 23665 | 209.164749145508 | 0.01 | 1 |   |
| ;     |                  |      |   |   |
| 23666 | 209.746887207031 | 0.02 | 1 |   |
| ;     |                  |      |   |   |

|       |                  |      |   |   |
|-------|------------------|------|---|---|
| 23667 | 209.916961669922 | 0.02 | 1 |   |
| ;     |                  |      |   |   |
| 23668 | 213.383331298828 | 0.17 | 1 |   |
| ;     |                  |      |   |   |
| 23669 | 199.376815795898 | 0.03 | 1 |   |
| ;     |                  |      |   |   |
| 23670 | 201.205429077148 | 0.03 | 1 |   |
| ;     |                  |      |   |   |
| 23671 | 200.823669433594 | 0.04 | 1 |   |
| ;     |                  |      |   |   |
| 23672 | 200.786224365234 | 0.07 | 1 |   |
| ;     |                  |      |   |   |
| 23673 | 200.350219726563 | 0.02 | 1 |   |
| ;     |                  |      |   |   |
| 23674 | 213.972579956055 | 0.08 | 1 |   |
| ;     |                  |      |   |   |
| 23675 | 214.316909790039 | 0.01 | 1 |   |
| ;     |                  |      |   |   |
| 23676 | 214.537857055664 | 0.07 | 1 |   |
| ;     |                  |      |   |   |
| 23677 | 208.252182006836 | 0.01 | 1 |   |
| ;     |                  |      |   |   |
| 23678 | 208.37922668457  | 0.05 | 1 |   |
| 23679 | 216.118682861328 | 0.01 | 1 | ; |
| ;     |                  |      |   |   |
| 23680 | 216.224502563477 | 0.01 | 1 |   |
| ;     |                  |      |   |   |
| 23681 | 215.775299072266 | 0.01 | 1 |   |
| ;     |                  |      |   |   |
| 23682 | 216.091506958008 | 0.00 | 1 |   |
| ;     |                  |      |   |   |
| 23683 | 215.713790893555 | 0.01 | 1 |   |
| ;     |                  |      |   |   |
| 23684 | 215.7939453125   | 0.01 | 1 | ; |
| 23685 | 205              | 0.10 | 1 | ; |
| 23686 | 205.061767578125 | 0.04 | 1 |   |
| ;     |                  |      |   |   |
| 23687 | 208.348007202148 | 0.00 | 1 |   |
| ;     |                  |      |   |   |
| 23688 | 208.136444091797 | 0.00 | 1 |   |
| ;     |                  |      |   |   |
| 23689 | 208.27668762207  | 0.02 | 1 | ; |
| 23690 | 208.620758056641 | 0.02 | 1 |   |
| ;     |                  |      |   |   |
| 23691 | 214.672210693359 | 0.02 | 1 |   |
| ;     |                  |      |   |   |
| 23692 | 214.559860229492 | 0.03 | 1 |   |
| ;     |                  |      |   |   |
| 23693 | 214.349243164063 | 0.03 | 1 |   |
| ;     |                  |      |   |   |

|       |                  |      |   |  |
|-------|------------------|------|---|--|
| 23694 | 209.205139160156 | 0.04 | 1 |  |
| ;     |                  |      |   |  |
| 23695 | 209.503753662109 | 0.01 | 1 |  |
| ;     |                  |      |   |  |
| 23696 | 193.150482177734 | 0.01 | 1 |  |
| ;     |                  |      |   |  |
| 23697 | 200.035263061523 | 0.00 | 1 |  |
| ;     |                  |      |   |  |
| 23698 | 200.031204223633 | 0.00 | 1 |  |
| ;     |                  |      |   |  |
| 23699 | 200.317520141602 | 0.01 | 1 |  |
| ;     |                  |      |   |  |
| 23700 | 203.212646484375 | 0.02 | 1 |  |
| ;     |                  |      |   |  |
| 23701 | 200              | 0.04 | 1 |  |
| 23702 | 200.075912475586 | 0.07 | 1 |  |
| ;     |                  |      |   |  |
| 23703 | 232.920745849609 | 0.00 | 1 |  |
| ;     |                  |      |   |  |
| 23704 | 218.566452026367 | 0.02 | 1 |  |
| ;     |                  |      |   |  |
| 23705 | 218.068359375    | 0.10 | 1 |  |
| 23706 | 218.327606201172 | 0.02 | 1 |  |
| ;     |                  |      |   |  |
| 23707 | 218.249328613281 | 0.04 | 1 |  |
| ;     |                  |      |   |  |
| 23708 | 207.871368408203 | 0.03 | 1 |  |
| ;     |                  |      |   |  |
| 23709 | 208.07861328125  | 0.03 | 1 |  |
| 23710 | 208.015487670898 | 0.03 | 1 |  |
| ;     |                  |      |   |  |
| 23711 | 208.272354125977 | 0.03 | 1 |  |
| ;     |                  |      |   |  |
| 23712 | 202.425079345703 | 0.05 | 1 |  |
| ;     |                  |      |   |  |
| 23713 | 203.960800170898 | 0.01 | 1 |  |
| ;     |                  |      |   |  |
| 23714 | 198.057556152344 | 0.02 | 1 |  |
| ;     |                  |      |   |  |
| 23715 | 198.690307617187 | 0.02 | 1 |  |
| ;     |                  |      |   |  |
| 23716 | 209.966247558594 | 0.06 | 1 |  |
| ;     |                  |      |   |  |
| 23717 | 207.931076049805 | 0.04 | 1 |  |
| ;     |                  |      |   |  |
| 23718 | 207.672088623047 | 0.04 | 1 |  |
| ;     |                  |      |   |  |
| 23719 | 208.288177490234 | 0.04 | 1 |  |
| ;     |                  |      |   |  |
| 23720 | 207.667678833008 | 0.06 | 1 |  |

|       |                  |      |   |  |   |
|-------|------------------|------|---|--|---|
| ;     |                  |      |   |  |   |
| 23721 | 209.586074829102 | 0.01 | 1 |  |   |
| ;     |                  |      |   |  |   |
| 23722 | 209.537902832031 | 0.02 | 1 |  |   |
| ;     |                  |      |   |  |   |
| 23723 | 209.242965698242 | 0.02 | 1 |  |   |
| ;     |                  |      |   |  |   |
| 23724 | 206.166854858398 | 0.03 | 1 |  |   |
| ;     |                  |      |   |  |   |
| 23725 | 206.087951660156 | 0.00 | 1 |  |   |
| ;     |                  |      |   |  |   |
| 23726 | 206.315979003906 | 0.01 | 1 |  |   |
| ;     |                  |      |   |  |   |
| 23727 | 202.429641723633 | 0.09 | 1 |  |   |
| ;     |                  |      |   |  |   |
| 23728 | 201.379898071289 | 0.04 | 1 |  |   |
| ;     |                  |      |   |  |   |
| 23729 | 201.116455078125 | 0.02 | 1 |  |   |
| ;     |                  |      |   |  |   |
| 23730 | 217.607208251953 | 0.03 | 1 |  |   |
| ;     |                  |      |   |  |   |
| 23731 | 217.585144042969 | 0.02 | 1 |  |   |
| ;     |                  |      |   |  |   |
| 23732 | 217.307464599609 | 0.03 | 1 |  |   |
| ;     |                  |      |   |  |   |
| 23733 | 217.414245605469 | 0.09 | 1 |  |   |
| ;     |                  |      |   |  |   |
| 23734 | 217.984710693359 | 0.01 | 1 |  |   |
| ;     |                  |      |   |  |   |
| 23735 | 230.553451538086 | 0.03 | 1 |  |   |
| ;     |                  |      |   |  |   |
| 23736 | 202.505310058594 | 0.00 | 1 |  |   |
| ;     |                  |      |   |  |   |
| 23737 | 231.138259887695 | 0.01 | 1 |  |   |
| ;     |                  |      |   |  |   |
| 23738 | 210              | 0.02 | 1 |  | ; |
| 23739 | 210.052536010742 | 0.02 | 1 |  |   |
| ;     |                  |      |   |  |   |
| 23740 | 210.08708190918  | 0.05 | 1 |  | ; |
| 23741 | 210.04606628418  | 0.05 | 1 |  | ; |
| 23742 | 210.627548217773 | 0.05 | 1 |  |   |
| ;     |                  |      |   |  |   |
| 23743 | 210.464889526367 | 0.05 | 1 |  |   |
| ;     |                  |      |   |  |   |
| 23744 | 211.769073486328 | 0.05 | 1 |  |   |
| ;     |                  |      |   |  |   |
| 23745 | 211.977203369141 | 0.00 | 1 |  |   |
| ;     |                  |      |   |  |   |
| 23746 | 212.222534179688 | 0.00 | 1 |  |   |
| ;     |                  |      |   |  |   |

|       |                  |      |   |   |  |  |
|-------|------------------|------|---|---|--|--|
| 23747 | 211.98210144043  | 0.00 | 1 |   |  |  |
| 23748 | 212.037551879883 | 0.00 |   | 1 |  |  |
| ;     |                  |      |   |   |  |  |
| 23749 | 214.070846557617 | 0.01 |   | 1 |  |  |
| ;     |                  |      |   |   |  |  |
| 23750 | 195.042098999023 | 0.01 |   | 1 |  |  |
| ;     |                  |      |   |   |  |  |
| 23751 | 195.037322998047 | 0.00 |   | 1 |  |  |
| ;     |                  |      |   |   |  |  |
| 23752 | 196.352081298828 | 0.01 |   | 1 |  |  |
| ;     |                  |      |   |   |  |  |
| 23753 | 205              | 0.06 | 1 |   |  |  |
| 23754 | 205.948791503906 | 0.02 |   | 1 |  |  |
| ;     |                  |      |   |   |  |  |
| 23755 | 205.956726074219 | 0.04 |   | 1 |  |  |
| ;     |                  |      |   |   |  |  |
| 23756 | 205              | 0.01 | 1 |   |  |  |
| 23757 | 205              | 0.03 | 1 |   |  |  |
| 23758 | 209.474258422852 | 0.00 |   | 1 |  |  |
| ;     |                  |      |   |   |  |  |
| 23759 | 201.130508422852 | 0.01 |   | 1 |  |  |
| ;     |                  |      |   |   |  |  |
| 23760 | 217.804840087891 | 0.01 |   | 1 |  |  |
| ;     |                  |      |   |   |  |  |
| 23761 | 210.545822143555 | 0.04 |   | 1 |  |  |
| ;     |                  |      |   |   |  |  |
| 23762 | 206.175430297852 | 0.03 |   | 1 |  |  |
| ;     |                  |      |   |   |  |  |
| 23763 | 206.354888916016 | 0.03 |   | 1 |  |  |
| ;     |                  |      |   |   |  |  |
| 23764 | 206.340087890625 | 0.00 |   | 1 |  |  |
| ;     |                  |      |   |   |  |  |
| 23765 | 210.061904907227 | 0.06 |   | 1 |  |  |
| ;     |                  |      |   |   |  |  |
| 23766 | 210.247634887695 | 0.05 |   | 1 |  |  |
| ;     |                  |      |   |   |  |  |
| 23767 | 209.942047119141 | 0.03 |   | 1 |  |  |
| ;     |                  |      |   |   |  |  |
| 23768 | 209.738891601563 | 0.02 |   | 1 |  |  |
| ;     |                  |      |   |   |  |  |
| 23769 | 206.607681274414 | 0.00 |   | 1 |  |  |
| ;     |                  |      |   |   |  |  |
| 23770 | 207.306488037109 | 0.01 |   | 1 |  |  |
| ;     |                  |      |   |   |  |  |
| 23771 | 206.207046508789 | 0.00 |   | 1 |  |  |
| ;     |                  |      |   |   |  |  |
| 23772 | 207.006439208984 | 0.01 |   | 1 |  |  |
| ;     |                  |      |   |   |  |  |
| 23773 | 216.152786254883 | 0.02 |   | 1 |  |  |
| ;     |                  |      |   |   |  |  |

|       |                  |      |   |
|-------|------------------|------|---|
| 23774 | 216.235000610352 | 0.02 | 1 |
| ;     |                  |      |   |
| 23775 | 206.649673461914 | 0.02 | 1 |
| ;     |                  |      |   |
| 23776 | 206.660385131836 | 0.02 | 1 |
| ;     |                  |      |   |
| 23777 | 208.275436401367 | 0.01 | 1 |
| ;     |                  |      |   |
| 23778 | 214.573638916016 | 0.03 | 1 |
| ;     |                  |      |   |
| 23779 | 206.396102905273 | 0.01 | 1 |
| ;     |                  |      |   |
| 23780 | 205.469131469727 | 0.01 | 1 |
| ;     |                  |      |   |
| 23781 | 206.998626708984 | 0.05 | 1 |
| ;     |                  |      |   |
| 23782 | 207.153930664062 | 0.01 | 1 |
| ;     |                  |      |   |
| 23783 | 209.673950195313 | 0.04 | 1 |
| ;     |                  |      |   |
| 23784 | 207.883972167969 | 0.04 | 1 |
| ;     |                  |      |   |
| 23785 | 207.644287109375 | 0.00 | 1 |
| ;     |                  |      |   |
| 23786 | 207.615264892578 | 0.00 | 1 |
| ;     |                  |      |   |
| 23787 | 202.068542480469 | 0.02 | 1 |
| ;     |                  |      |   |
| 23788 | 192.925979614258 | 0.00 | 1 |
| ;     |                  |      |   |
| 23789 | 200.322891235352 | 0.01 | 1 |
| ;     |                  |      |   |
| 23790 | 200.942092895508 | 0.02 | 1 |
| ;     |                  |      |   |
| 23791 | 211.794952392578 | 0.01 | 1 |
| ;     |                  |      |   |
| 23792 | 202.533981323242 | 0.01 | 1 |
| ;     |                  |      |   |
| 23793 | 208.407272338867 | 0.01 | 1 |
| ;     |                  |      |   |
| 23794 | 208.349258422852 | 0.01 | 1 |
| ;     |                  |      |   |
| 23795 | 208.070205688477 | 0.05 | 1 |
| ;     |                  |      |   |
| 23796 | 198.281600952148 | 0.01 | 1 |
| ;     |                  |      |   |
| 23797 | 199.059188842773 | 0.00 | 1 |
| ;     |                  |      |   |
| 23798 | 199.451782226563 | 0.00 | 1 |
| ;     |                  |      |   |

|       |                  |      |   |   |
|-------|------------------|------|---|---|
| 23799 | 196.512268066406 | 0.01 | 1 |   |
| ;     |                  |      |   |   |
| 23800 | 200.128295898438 | 0.01 | 1 |   |
| ;     |                  |      |   |   |
| 23801 | 200.140716552734 | 0.01 | 1 |   |
| ;     |                  |      |   |   |
| 23802 | 200.024520874023 | 0.04 | 1 |   |
| ;     |                  |      |   |   |
| 23803 | 199.74836730957  | 0.03 | 1 | ; |
| 23804 | 202.560241699219 | 0.02 | 1 |   |
| ;     |                  |      |   |   |
| 23805 | 222.917236328125 | 0.01 | 1 |   |
| ;     |                  |      |   |   |
| 23806 | 203.278015136719 | 0.01 | 1 |   |
| ;     |                  |      |   |   |
| 23807 | 206.560684204102 | 0.09 | 1 |   |
| ;     |                  |      |   |   |
| 23808 | 206.538345336914 | 0.01 | 1 |   |
| ;     |                  |      |   |   |
| 23809 | 206.594360351563 | 0.00 | 1 |   |
| ;     |                  |      |   |   |
| 23810 | 205              | 0.02 | 1 | ; |
| 23811 | 207.801147460938 | 0.03 | 1 |   |
| ;     |                  |      |   |   |
| 23812 | 214.955032348633 | 0.02 | 1 |   |
| ;     |                  |      |   |   |
| 23813 | 215.026962280273 | 0.02 | 1 |   |
| ;     |                  |      |   |   |
| 23814 | 214.020629882813 | 0.04 | 1 |   |
| ;     |                  |      |   |   |
| 23815 | 213.767288208008 | 0.04 | 1 |   |
| ;     |                  |      |   |   |
| 23816 | 213.185150146484 | 0.02 | 1 |   |
| ;     |                  |      |   |   |
| 23817 | 210.800567626953 | 0.02 | 1 |   |
| ;     |                  |      |   |   |
| 23818 | 209.164169311523 | 0.05 | 1 |   |
| ;     |                  |      |   |   |
| 23819 | 209.427093505859 | 0.06 | 1 |   |
| ;     |                  |      |   |   |
| 23820 | 209.416534423828 | 0.11 | 1 |   |
| ;     |                  |      |   |   |
| 23821 | 210.788238525391 | 0.07 | 1 |   |
| ;     |                  |      |   |   |
| 23822 | 206.977447509766 | 0.01 | 1 |   |
| ;     |                  |      |   |   |
| 23823 | 208.329727172852 | 0.03 | 1 |   |
| ;     |                  |      |   |   |
| 23824 | 209.28010559082  | 0.04 | 1 | ; |
| 23825 | 211.28059387207  | 0.01 | 1 | ; |



|       |                  |      |   |   |
|-------|------------------|------|---|---|
| 23826 | 206.191528320313 | 0.00 | 1 |   |
| ;     |                  |      |   |   |
| 23827 | 209.305130004883 | 0.02 | 1 |   |
| ;     |                  |      |   |   |
| 23828 | 196.801391601563 | 0.02 | 1 |   |
| ;     |                  |      |   |   |
| 23829 | 195.227722167969 | 0.01 | 1 |   |
| ;     |                  |      |   |   |
| 23830 | 196.101608276367 | 0.01 | 1 |   |
| ;     |                  |      |   |   |
| 23831 | 202.377838134766 | 0.00 | 1 |   |
| ;     |                  |      |   |   |
| 23832 | 215.180847167969 | 0.01 | 1 |   |
| ;     |                  |      |   |   |
| 23833 | 215.600387573242 | 0.01 | 1 |   |
| ;     |                  |      |   |   |
| 23834 | 216.392059326172 | 0.03 | 1 |   |
| ;     |                  |      |   |   |
| 23835 | 216.663833618164 | 0.02 | 1 |   |
| ;     |                  |      |   |   |
| 23836 | 197.696151733398 | 0.02 | 1 |   |
| ;     |                  |      |   |   |
| 23837 | 195.177658081055 | 0.00 | 1 |   |
| ;     |                  |      |   |   |
| 23838 | 194.945343017578 | 0.00 | 1 |   |
| ;     |                  |      |   |   |
| 23839 | 211.970779418945 | 0.04 | 1 |   |
| ;     |                  |      |   |   |
| 23840 | 213.291641235352 | 0.01 | 1 |   |
| ;     |                  |      |   |   |
| 23841 | 206.544097900391 | 0.03 | 1 |   |
| ;     |                  |      |   |   |
| 23842 | 201.690734863281 | 0.01 | 1 |   |
| ;     |                  |      |   |   |
| 23843 | 209.206695556641 | 0.01 | 1 |   |
| ;     |                  |      |   |   |
| 23844 | 209.417892456055 | 0.01 | 1 |   |
| ;     |                  |      |   |   |
| 23845 | 209.428924560547 | 0.02 | 1 |   |
| ;     |                  |      |   |   |
| 23846 | 209.436767578125 | 0.02 | 1 |   |
| ;     |                  |      |   |   |
| 23847 | 209.432220458984 | 0.02 | 1 |   |
| ;     |                  |      |   |   |
| 23848 | 208.1240234375   | 0.00 | 1 |   |
| 23849 | 208.748687744141 | 0.01 | 1 | ; |
| ;     |                  |      |   |   |
| 23850 | 208.92253112793  | 0.01 | 1 |   |
| 23851 | 209.116470336914 | 0.01 | 1 | ; |
| ;     |                  |      |   |   |

|       |                      |      |   |   |
|-------|----------------------|------|---|---|
| 23852 | 208.948257446289     | 0.00 | 1 |   |
| ;     |                      |      |   |   |
| 23853 | 212.120300292969     | 0.00 | 1 |   |
| ;     |                      |      |   |   |
| 23854 | 204.348052978516     | 0.01 | 1 |   |
| ;     |                      |      |   |   |
| 23855 | 204.818405151367     | 0.01 | 1 |   |
| ;     |                      |      |   |   |
| 23856 | 204.582977294922     | 0.03 | 1 |   |
| ;     |                      |      |   |   |
| 23857 | 207.659561157227     | 0.12 | 1 |   |
| ;     |                      |      |   |   |
| 23858 | 207.168609619141     | 0.03 | 1 |   |
| ;     |                      |      |   |   |
| 23859 | 200.141891479492     | 0.01 | 1 |   |
| ;     |                      |      |   |   |
| 23860 | 197.885833740234     | 0.02 | 1 |   |
| ;     |                      |      |   |   |
| 23861 | 197.605697631836     | 0.00 | 1 |   |
| ;     |                      |      |   |   |
| 23862 | 205.51155090332 0.01 |      | 1 | ; |
| 23863 | 202.625503540039     | 0.04 | 1 |   |
| ;     |                      |      |   |   |
| 23864 | 202.485885620117     | 0.03 | 1 |   |
| ;     |                      |      |   |   |
| 23865 | 202.543716430664     | 0.02 | 1 |   |
| ;     |                      |      |   |   |
| 23866 | 201.13005065918 0.00 |      | 1 | ; |
| 23867 | 201.376007080078     | 0.03 | 1 |   |
| ;     |                      |      |   |   |
| 23868 | 213.231552124023     | 0.03 | 1 |   |
| ;     |                      |      |   |   |
| 23869 | 196.461883544922     | 0.01 | 1 |   |
| ;     |                      |      |   |   |
| 23870 | 196.714172363281     | 0.01 | 1 |   |
| ;     |                      |      |   |   |
| 23871 | 196.704406738281     | 0.01 | 1 |   |
| ;     |                      |      |   |   |
| 23872 | 203.187301635742     | 0.04 | 1 |   |
| ;     |                      |      |   |   |
| 23873 | 203.269424438477     | 0.00 | 1 |   |
| ;     |                      |      |   |   |
| 23874 | 203.174835205078     | 0.00 | 1 |   |
| ;     |                      |      |   |   |
| 23875 | 203.10188293457 0.00 |      | 1 | ; |
| 23876 | 203.285308837891     | 0.00 | 1 |   |
| ;     |                      |      |   |   |
| 23877 | 203.312347412109     | 0.00 | 1 |   |
| ;     |                      |      |   |   |
| 23878 | 222.044860839844     | 0.00 | 1 |   |

|       |                  |      |   |   |   |
|-------|------------------|------|---|---|---|
| ;     |                  |      |   |   |   |
| 23879 | 222.142074584961 | 0.00 |   | 1 |   |
| ;     |                  |      |   |   |   |
| 23880 | 232.59944152832  | 0.06 | 1 |   | ; |
| 23881 | 232.448318481445 | 0.02 |   | 1 |   |
| ;     |                  |      |   |   |   |
| 23882 | 232.453842163086 | 0.05 |   | 1 |   |
| ;     |                  |      |   |   |   |
| 23883 | 200              | 0.03 | 1 |   | ; |
| 23884 | 200.181869506836 | 0.02 |   | 1 |   |
| ;     |                  |      |   |   |   |
| 23885 | 200              | 0.00 | 1 |   | ; |
| 23886 | 200              | 0.02 | 1 |   | ; |
| 23887 | 200              | 0.01 | 1 |   | ; |
| 23888 | 200              | 0.00 | 1 |   | ; |
| 23889 | 200              | 0.00 | 1 |   | ; |
| 23890 | 200              | 0.00 | 1 |   | ; |
| 23891 | 205.206146240234 | 0.01 |   | 1 |   |
| ;     |                  |      |   |   |   |
| 23892 | 200              | 0.00 | 1 |   | ; |
| 23893 | 200.048675537109 | 0.02 |   | 1 |   |
| ;     |                  |      |   |   |   |
| 23894 | 200.449905395508 | 0.01 |   | 1 |   |
| ;     |                  |      |   |   |   |
| 23895 | 196.369079589844 | 0.01 |   | 1 |   |
| ;     |                  |      |   |   |   |
| 23896 | 206.662200927734 | 0.01 |   | 1 |   |
| ;     |                  |      |   |   |   |
| 23897 | 206.275512695313 | 0.02 |   | 1 |   |
| ;     |                  |      |   |   |   |
| 23898 | 215.531860351563 | 0.05 |   | 1 |   |
| ;     |                  |      |   |   |   |
| 23899 | 215.387191772461 | 0.00 |   | 1 |   |
| ;     |                  |      |   |   |   |
| 23900 | 215.798568725586 | 0.00 |   | 1 |   |
| ;     |                  |      |   |   |   |
| 23901 | 215.283554077148 | 0.00 |   | 1 |   |
| ;     |                  |      |   |   |   |
| 23902 | 200.437408447266 | 0.00 |   | 1 |   |
| ;     |                  |      |   |   |   |
| 23903 | 200.337783813477 | 0.00 |   | 1 |   |
| ;     |                  |      |   |   |   |
| 23904 | 206.481079101563 | 0.00 |   | 1 |   |
| ;     |                  |      |   |   |   |
| 23905 | 216.706115722656 | 0.04 |   | 1 |   |
| ;     |                  |      |   |   |   |
| 23906 | 217.153442382813 | 0.04 |   | 1 |   |
| ;     |                  |      |   |   |   |
| 23907 | 215.451461791992 | 0.02 |   | 1 |   |
| ;     |                  |      |   |   |   |

|       |                      |      |   |   |
|-------|----------------------|------|---|---|
| 23908 | 207.878982543945     | 0.02 | 1 |   |
| ;     |                      |      |   |   |
| 23909 | 208.172805786133     | 0.03 | 1 |   |
| ;     |                      |      |   |   |
| 23910 | 207.361358642578     | 0.03 | 1 |   |
| ;     |                      |      |   |   |
| 23911 | 206.782165527344     | 0.02 | 1 |   |
| ;     |                      |      |   |   |
| 23912 | 202.75993347168 0.00 |      | 1 | ; |
| 23913 | 229.427108764648     | 0.01 | 1 |   |
| ;     |                      |      |   |   |
| 23914 | 229.708435058594     | 0.00 | 1 |   |
| ;     |                      |      |   |   |
| 23915 | 202.20475769043 0.00 |      | 1 | ; |
| 23916 | 204.915771484375     | 0.02 | 1 |   |
| ;     |                      |      |   |   |
| 23917 | 201.370834350586     | 0.05 | 1 |   |
| ;     |                      |      |   |   |
| 23918 | 212.142715454102     | 0.00 | 1 |   |
| ;     |                      |      |   |   |
| 23919 | 217.70263671875 0.01 |      | 1 | ; |
| 23920 | 205.329971313477     | 0.03 | 1 |   |
| ;     |                      |      |   |   |
| 23921 | 202.208724975586     | 0.02 | 1 |   |
| ;     |                      |      |   |   |
| 23922 | 202.169967651367     | 0.04 | 1 |   |
| ;     |                      |      |   |   |
| 23923 | 218.143112182617     | 0.00 | 1 |   |
| ;     |                      |      |   |   |
| 23924 | 215.0511116943359    | 0.00 | 1 |   |
| ;     |                      |      |   |   |
| 23925 | 215.624359130859     | 0.00 | 1 |   |
| ;     |                      |      |   |   |
| 23926 | 215.260147094727     | 0.00 | 1 |   |
| ;     |                      |      |   |   |
| 23927 | 209.139205932617     | 0.02 | 1 |   |
| ;     |                      |      |   |   |
| 23928 | 201.352935791016     | 0.03 | 1 |   |
| ;     |                      |      |   |   |
| 23929 | 214.077087402344     | 0.00 | 1 |   |
| ;     |                      |      |   |   |
| 23930 | 213.690200805664     | 0.00 | 1 |   |
| ;     |                      |      |   |   |
| 23931 | 214.665557861328     | 0.02 | 1 |   |
| ;     |                      |      |   |   |
| 23932 | 213.935760498047     | 0.04 | 1 |   |
| ;     |                      |      |   |   |
| 23933 | 213.689498901367     | 0.03 | 1 |   |
| ;     |                      |      |   |   |
| 23934 | 213.847198486328     | 0.05 | 1 |   |

|       |                  |      |  |   |   |   |
|-------|------------------|------|--|---|---|---|
| ;     |                  |      |  |   |   |   |
| 23935 | 214.655868530273 | 0.08 |  | 1 |   |   |
| ;     |                  |      |  |   |   |   |
| 23936 | 214.135894775391 | 0.01 |  | 1 |   |   |
| ;     |                  |      |  |   |   |   |
| 23937 | 202.280853271484 | 0.02 |  | 1 |   |   |
| ;     |                  |      |  |   |   |   |
| 23938 | 202.556716918945 | 0.01 |  | 1 |   |   |
| ;     |                  |      |  |   |   |   |
| 23939 | 205              | 0.03 |  | 1 |   | ; |
| 23940 | 205              | 0.00 |  | 1 |   | ; |
| 23941 | 205              | 0.00 |  | 1 |   | ; |
| 23942 | 209.007553100586 | 0.04 |  |   | 1 |   |
| ;     |                  |      |  |   |   |   |
| 23943 | 208.802734375    | 0.03 |  | 1 |   | ; |
| 23944 | 210              | 0.01 |  | 1 |   | ; |
| 23945 | 205              | 0.02 |  | 1 |   | ; |
| 23946 | 213.413955688477 | 0.02 |  |   | 1 |   |
| ;     |                  |      |  |   |   |   |
| 23947 | 196.333633422852 | 0.01 |  |   | 1 |   |
| ;     |                  |      |  |   |   |   |
| 23948 | 196.373718261719 | 0.01 |  |   | 1 |   |
| ;     |                  |      |  |   |   |   |
| 23949 | 219.313385009766 | 0.06 |  |   | 1 |   |
| ;     |                  |      |  |   |   |   |
| 23950 | 194.550018310547 | 0.00 |  |   | 1 |   |
| ;     |                  |      |  |   |   |   |
| 23951 | 216.536270141602 | 0.07 |  |   | 1 |   |
| ;     |                  |      |  |   |   |   |
| 23952 | 200              | 0.03 |  | 1 |   | ; |
| 23953 | 200.326309204102 | 0.05 |  |   | 1 |   |
| ;     |                  |      |  |   |   |   |
| 23954 | 201.001983642578 | 0.04 |  |   | 1 |   |
| ;     |                  |      |  |   |   |   |
| 23955 | 204.632583618164 | 0.00 |  |   | 1 |   |
| ;     |                  |      |  |   |   |   |
| 23956 | 202.995223999023 | 0.02 |  |   | 1 |   |
| ;     |                  |      |  |   |   |   |
| 23957 | 200.506698608398 | 0.01 |  |   | 1 |   |
| ;     |                  |      |  |   |   |   |
| 23958 | 200.601577758789 | 0.01 |  |   | 1 |   |
| ;     |                  |      |  |   |   |   |
| 23959 | 199.734466552734 | 0.03 |  |   | 1 |   |
| ;     |                  |      |  |   |   |   |
| 23960 | 199.660140991211 | 0.01 |  |   | 1 |   |
| ;     |                  |      |  |   |   |   |
| 23961 | 199.512405395508 | 0.01 |  |   | 1 |   |
| ;     |                  |      |  |   |   |   |
| 23962 | 202.363677978516 | 0.01 |  |   | 1 |   |
| ;     |                  |      |  |   |   |   |

|       |                      |      |   |   |
|-------|----------------------|------|---|---|
| 23963 | 202.677093505859     | 0.01 | 1 |   |
| ;     |                      |      |   |   |
| 23964 | 201.703308105469     | 0.01 | 1 |   |
| ;     |                      |      |   |   |
| 23965 | 201.293884277344     | 0.02 | 1 |   |
| ;     |                      |      |   |   |
| 23966 | 214.955947875977     | 0.01 | 1 |   |
| ;     |                      |      |   |   |
| 23967 | 207.319778442383     | 0.03 | 1 |   |
| ;     |                      |      |   |   |
| 23968 | 215.970886230469     | 0.14 | 1 |   |
| ;     |                      |      |   |   |
| 23969 | 216.27751159668 0.09 |      | 1 | ; |
| 23970 | 215.302215576172     | 0.06 | 1 |   |
| ;     |                      |      |   |   |
| 23971 | 215.01057434082 0.08 |      | 1 | ; |
| 23972 | 214.842178344727     | 0.01 | 1 |   |
| ;     |                      |      |   |   |
| 23973 | 214.655746459961     | 0.02 | 1 |   |
| ;     |                      |      |   |   |
| 23974 | 214.932907104492     | 0.01 | 1 |   |
| ;     |                      |      |   |   |
| 23975 | 215.024810791016     | 0.01 | 1 |   |
| ;     |                      |      |   |   |
| 23976 | 214.749359130859     | 0.01 | 1 |   |
| ;     |                      |      |   |   |
| 23977 | 214.977905273438     | 0.00 | 1 |   |
| ;     |                      |      |   |   |
| 23978 | 215.018020629883     | 0.00 | 1 |   |
| ;     |                      |      |   |   |
| 23979 | 206.510391235352     | 0.03 | 1 |   |
| ;     |                      |      |   |   |
| 23980 | 205.618728637695     | 0.04 | 1 |   |
| ;     |                      |      |   |   |
| 23981 | 200.692718505859     | 0.01 | 1 |   |
| ;     |                      |      |   |   |
| 23982 | 206.775695800781     | 0.00 | 1 |   |
| ;     |                      |      |   |   |
| 23983 | 200.820404052734     | 0.03 | 1 |   |
| ;     |                      |      |   |   |
| 23984 | 202.287216186523     | 0.01 | 1 |   |
| ;     |                      |      |   |   |
| 23985 | 202.42024230957 0.00 |      | 1 | ; |
| 23986 | 196.822662353516     | 0.01 | 1 |   |
| ;     |                      |      |   |   |
| 23987 | 199.177337646484     | 0.02 | 1 |   |
| ;     |                      |      |   |   |
| 23988 | 203.926162719727     | 0.04 | 1 |   |
| ;     |                      |      |   |   |
| 23989 | 193.249221801758     | 0.00 | 1 |   |

|       |                  |      |   |   |   |
|-------|------------------|------|---|---|---|
| ;     |                  |      |   |   |   |
| 23990 | 193.404541015625 | 0.14 |   | 1 |   |
| ;     |                  |      |   |   |   |
| 23991 | 193.248413085938 | 0.01 |   | 1 |   |
| ;     |                  |      |   |   |   |
| 23992 | 204.422607421875 | 0.01 |   | 1 |   |
| ;     |                  |      |   |   |   |
| 23993 | 200.150802612305 | 0.01 |   | 1 |   |
| ;     |                  |      |   |   |   |
| 23994 | 200              | 0.01 | 1 |   | ; |
| 23995 | 195.113647460938 | 0.00 |   | 1 |   |
| ;     |                  |      |   |   |   |
| 23996 | 199.691787719727 | 0.03 |   | 1 |   |
| ;     |                  |      |   |   |   |
| 23997 | 207.99267578125  | 0.02 | 1 |   | ; |
| 23998 | 220.502868652344 | 0.01 |   | 1 |   |
| ;     |                  |      |   |   |   |
| 23999 | 209.275787353516 | 0.02 |   | 1 |   |
| ;     |                  |      |   |   |   |
| 24000 | 210              | 0.05 | 1 |   | ; |
| 24001 | 205.013305664063 | 0.01 |   | 1 |   |
| ;     |                  |      |   |   |   |
| 24002 | 202.312362670898 | 0.00 |   | 1 |   |
| ;     |                  |      |   |   |   |
| 24003 | 210              | 0.02 | 1 |   | ; |
| 24004 | 229.683029174805 | 0.02 |   | 1 |   |
| ;     |                  |      |   |   |   |
| 24005 | 229.441009521484 | 0.02 |   | 1 |   |
| ;     |                  |      |   |   |   |
| 24006 | 212.78385925293  | 0.11 | 1 |   | ; |
| 24007 | 213.739547729492 | 0.01 |   | 1 |   |
| ;     |                  |      |   |   |   |
| 24008 | 217.146713256836 | 0.01 |   | 1 |   |
| ;     |                  |      |   |   |   |
| 24009 | 217.445938110352 | 0.02 |   | 1 |   |
| ;     |                  |      |   |   |   |
| 24010 | 208.993865966797 | 0.04 |   | 1 |   |
| ;     |                  |      |   |   |   |
| 24011 | 208.558822631836 | 0.04 |   | 1 |   |
| ;     |                  |      |   |   |   |
| 24012 | 209.287521362305 | 0.02 |   | 1 |   |
| ;     |                  |      |   |   |   |
| 24013 | 208.799057006836 | 0.02 |   | 1 |   |
| ;     |                  |      |   |   |   |
| 24014 | 199.83821105957  | 0.00 | 1 |   | ; |
| 24015 | 200.197021484375 | 0.02 |   | 1 |   |
| ;     |                  |      |   |   |   |
| 24016 | 200.435302734375 | 0.02 |   | 1 |   |
| ;     |                  |      |   |   |   |
| 24017 | 209.094360351563 | 0.02 |   | 1 |   |

|       |                  |      |   |   |   |
|-------|------------------|------|---|---|---|
| ;     |                  |      |   |   |   |
| 24018 | 208.748886108398 | 0.02 |   | 1 |   |
| ;     |                  |      |   |   |   |
| 24019 | 214.408294677734 | 0.04 |   | 1 |   |
| ;     |                  |      |   |   |   |
| 24020 | 217.404052734375 | 0.00 |   | 1 |   |
| ;     |                  |      |   |   |   |
| 24021 | 216.613037109375 | 0.01 |   | 1 |   |
| ;     |                  |      |   |   |   |
| 24022 | 213.766174316406 | 0.02 |   | 1 |   |
| ;     |                  |      |   |   |   |
| 24023 | 196.145843505859 | 0.00 |   | 1 |   |
| ;     |                  |      |   |   |   |
| 24024 | 208.37646484375  | 0.04 | 1 |   | ; |
| 24025 | 209.104888916016 | 0.04 |   | 1 |   |
| ;     |                  |      |   |   |   |
| 24026 | 216.388336181641 | 0.01 |   | 1 |   |
| ;     |                  |      |   |   |   |
| 24027 | 199.569671630859 | 0.04 |   | 1 |   |
| ;     |                  |      |   |   |   |
| 24028 | 199.435913085938 | 0.03 |   | 1 |   |
| ;     |                  |      |   |   |   |
| 24029 | 233.962890625    | 0.01 | 1 |   | ; |
| 24030 | 234.806640625    | 0.03 | 1 |   | ; |
| 24031 | 234.222381591797 | 0.01 |   | 1 |   |
| ;     |                  |      |   |   |   |
| 24032 | 234.183059692383 | 0.00 |   | 1 |   |
| ;     |                  |      |   |   |   |
| 24033 | 202.39045715332  | 0.00 | 1 |   | ; |
| 24034 | 202.38053894043  | 0.00 | 1 |   | ; |
| 24035 | 200.239120483398 | 0.01 |   | 1 |   |
| ;     |                  |      |   |   |   |
| 24036 | 219.24430847168  | 0.56 | 1 |   | ; |
| 24037 | 217.587280273438 | 0.03 |   | 1 |   |
| ;     |                  |      |   |   |   |
| 24038 | 218.245727539063 | 0.04 |   | 1 |   |
| ;     |                  |      |   |   |   |
| 24039 | 204.768951416016 | 0.01 |   | 1 |   |
| ;     |                  |      |   |   |   |
| 24040 | 215.59033203125  | 0.03 | 1 |   | ; |
| 24041 | 215.834075927734 | 0.02 |   | 1 |   |
| ;     |                  |      |   |   |   |
| 24042 | 220.730194091797 | 0.01 |   | 1 |   |
| ;     |                  |      |   |   |   |
| 24043 | 220.169631958008 | 0.03 |   | 1 |   |
| ;     |                  |      |   |   |   |
| 24044 | 220.151016235352 | 0.03 |   | 1 |   |
| ;     |                  |      |   |   |   |
| 24045 | 223.369186401367 | 0.02 |   | 1 |   |
| ;     |                  |      |   |   |   |



|       |                      |      |   |   |
|-------|----------------------|------|---|---|
| 24046 | 235.566848754883     | 0.02 | 1 |   |
| ;     |                      |      |   |   |
| 24047 | 230.938766479492     | 0.00 | 1 |   |
| ;     |                      |      |   |   |
| 24048 | 206.319595336914     | 0.01 | 1 |   |
| ;     |                      |      |   |   |
| 24049 | 217.43293762207 0.03 |      | 1 |   |
| 24050 | 220.525436401367     | 0.06 | 1 | ; |
| ;     |                      |      |   |   |
| 24051 | 219.658767700195     | 0.04 | 1 |   |
| ;     |                      |      |   |   |
| 24052 | 214.826248168945     | 0.01 | 1 |   |
| ;     |                      |      |   |   |
| 24053 | 200.809173583984     | 0.04 | 1 |   |
| ;     |                      |      |   |   |
| 24054 | 200.798004150391     | 0.01 | 1 |   |
| ;     |                      |      |   |   |
| 24055 | 200.196563720703     | 0.06 | 1 |   |
| ;     |                      |      |   |   |
| 24056 | 200.205215454102     | 0.01 | 1 |   |
| ;     |                      |      |   |   |
| 24057 | 203.815704345703     | 0.06 | 1 |   |
| ;     |                      |      |   |   |
| 24058 | 202.354782104492     | 0.05 | 1 |   |
| ;     |                      |      |   |   |
| 24059 | 200.390151977539     | 0.03 | 1 |   |
| ;     |                      |      |   |   |
| 24060 | 201.108810424805     | 0.00 | 1 |   |
| ;     |                      |      |   |   |
| 24061 | 198.696334838867     | 0.11 | 1 |   |
| ;     |                      |      |   |   |
| 24062 | 201.21501159668 0.00 |      | 1 |   |
| 24063 | 208.073883056641     | 0.07 | 1 | ; |
| ;     |                      |      |   |   |
| 24064 | 214.406295776367     | 0.00 | 1 |   |
| ;     |                      |      |   |   |
| 24065 | 214.649444580078     | 0.00 | 1 |   |
| ;     |                      |      |   |   |
| 24066 | 194.681747436523     | 0.02 | 1 |   |
| ;     |                      |      |   |   |
| 24067 | 200.037445068359     | 0.01 | 1 |   |
| ;     |                      |      |   |   |
| 24068 | 218.134490966797     | 0.00 | 1 |   |
| ;     |                      |      |   |   |
| 24069 | 204.536437988281     | 0.00 | 1 |   |
| ;     |                      |      |   |   |
| 24070 | 214.989501953125     | 0.02 | 1 |   |
| ;     |                      |      |   |   |
| 24071 | 205.068557739258     | 0.04 | 1 |   |
| ;     |                      |      |   |   |

|       |                  |      |   |  |
|-------|------------------|------|---|--|
| 24072 | 198.541442871094 | 0.06 | 1 |  |
| ;     |                  |      |   |  |
| 24073 | 197.421157836914 | 0.01 | 1 |  |
| ;     |                  |      |   |  |
| 24074 | 196.818374633789 | 0.01 | 1 |  |
| ;     |                  |      |   |  |
| 24075 | 205              | 0.04 | 1 |  |
| 24076 | 209.506881713867 | 0.00 | 1 |  |
| ;     |                  |      |   |  |
| 24077 | 216.966918945313 | 0.01 | 1 |  |
| ;     |                  |      |   |  |
| 24078 | 206.775039672852 | 0.00 | 1 |  |
| ;     |                  |      |   |  |
| 24079 | 199.929153442383 | 0.00 | 1 |  |
| ;     |                  |      |   |  |
| 24080 | 199.922058105469 | 0.02 | 1 |  |
| ;     |                  |      |   |  |
| 24081 | 199.936264038086 | 0.02 | 1 |  |
| ;     |                  |      |   |  |
| 24082 | 199.896591186523 | 0.03 | 1 |  |
| ;     |                  |      |   |  |
| 24083 | 201.916793823242 | 0.00 | 1 |  |
| ;     |                  |      |   |  |
| 24084 | 202.43537902832  | 0.02 | 1 |  |
| 24085 | 200.558059692383 | 0.01 | 1 |  |
| ;     |                  |      |   |  |
| 24086 | 200              | 0.02 | 1 |  |
| 24087 | 202.172775268555 | 0.04 | 1 |  |
| ;     |                  |      |   |  |
| 24088 | 193.455001831055 | 0.00 | 1 |  |
| ;     |                  |      |   |  |
| 24089 | 193.458526611328 | 0.05 | 1 |  |
| ;     |                  |      |   |  |
| 24090 | 202.604476928711 | 0.03 | 1 |  |
| ;     |                  |      |   |  |
| 24091 | 206.03385925293  | 0.05 | 1 |  |
| 24092 | 205.541946411133 | 0.91 | 1 |  |
| ;     |                  |      |   |  |
| 24093 | 205.530868530273 | 0.00 | 1 |  |
| ;     |                  |      |   |  |
| 24094 | 201.873397827148 | 0.00 | 1 |  |
| ;     |                  |      |   |  |
| 24095 | 207.370208740234 | 0.02 | 1 |  |
| ;     |                  |      |   |  |
| 24096 | 206.636184692383 | 0.02 | 1 |  |
| ;     |                  |      |   |  |
| 24097 | 206.59196472168  | 0.04 | 1 |  |
| 24098 | 206.681701660156 | 0.01 | 1 |  |
| ;     |                  |      |   |  |
| 24099 | 210.009857177734 | 0.02 | 1 |  |

|       |                      |      |   |   |   |
|-------|----------------------|------|---|---|---|
| ;     |                      |      |   |   |   |
| 24100 | 209.775955200195     | 0.02 |   | 1 |   |
| ;     |                      |      |   |   |   |
| 24101 | 209.477493286133     | 0.03 |   | 1 |   |
| ;     |                      |      |   |   |   |
| 24102 | 199.168762207031     | 0.03 |   | 1 |   |
| ;     |                      |      |   |   |   |
| 24103 | 201.59504699707 0.01 |      | 1 |   | ; |
| 24104 | 202.119506835938     | 0.01 |   | 1 |   |
| ;     |                      |      |   |   |   |
| 24105 | 200.028060913086     | 0.05 |   | 1 |   |
| ;     |                      |      |   |   |   |
| 24106 | 199.746734619141     | 0.01 |   | 1 |   |
| ;     |                      |      |   |   |   |
| 24107 | 206.220718383789     | 0.06 |   | 1 |   |
| ;     |                      |      |   |   |   |
| 24108 | 208.506393432617     | 0.00 |   | 1 |   |
| ;     |                      |      |   |   |   |
| 24109 | 213.738998413086     | 0.00 |   | 1 |   |
| ;     |                      |      |   |   |   |
| 24110 | 213.869445800781     | 0.02 |   | 1 |   |
| ;     |                      |      |   |   |   |
| 24111 | 213.865844726562     | 0.00 |   | 1 |   |
| ;     |                      |      |   |   |   |
| 24112 | 209.245269775391     | 0.03 |   | 1 |   |
| ;     |                      |      |   |   |   |
| 24113 | 193.648483276367     | 0.00 |   | 1 |   |
| ;     |                      |      |   |   |   |
| 24114 | 205.55973815918 0.02 |      | 1 |   | ; |
| 24115 | 206.197830200195     | 0.02 |   | 1 |   |
| ;     |                      |      |   |   |   |
| 24116 | 208.756881713867     | 0.02 |   | 1 |   |
| ;     |                      |      |   |   |   |
| 24117 | 208.293060302734     | 0.01 |   | 1 |   |
| ;     |                      |      |   |   |   |
| 24118 | 207.240356445313     | 0.04 |   | 1 |   |
| ;     |                      |      |   |   |   |
| 24119 | 207.258529663086     | 0.04 |   | 1 |   |
| ;     |                      |      |   |   |   |
| 24120 | 201.902648925781     | 0.00 |   | 1 |   |
| ;     |                      |      |   |   |   |
| 24121 | 201.506408691406     | 0.08 |   | 1 |   |
| ;     |                      |      |   |   |   |
| 24122 | 201.460235595703     | 0.04 |   | 1 |   |
| ;     |                      |      |   |   |   |
| 24123 | 202.273834228516     | 0.05 |   | 1 |   |
| ;     |                      |      |   |   |   |
| 24124 | 202.769180297852     | 0.05 |   | 1 |   |
| ;     |                      |      |   |   |   |
| 24125 | 203.063400268555     | 0.00 |   | 1 |   |

|       |                  |      |   |   |  |   |
|-------|------------------|------|---|---|--|---|
| ;     |                  |      |   |   |  |   |
| 24126 | 200              | 0.01 | 1 |   |  | ; |
| 24127 | 200              | 0.01 | 1 |   |  | ; |
| 24128 | 200              | 0.00 | 1 |   |  | ; |
| 24129 | 200              | 0.00 | 1 |   |  | ; |
| 24130 | 202.191604614258 | 0.00 |   | 1 |  |   |
| ;     |                  |      |   |   |  |   |
| 24131 | 202.358703613281 | 0.01 |   | 1 |  |   |
| ;     |                  |      |   |   |  |   |
| 24132 | 200.896118164063 | 0.01 |   | 1 |  |   |
| ;     |                  |      |   |   |  |   |
| 24133 | 212.227890014648 | 0.00 |   | 1 |  |   |
| ;     |                  |      |   |   |  |   |
| 24134 | 208.635406494141 | 0.23 |   | 1 |  |   |
| ;     |                  |      |   |   |  |   |
| 24135 | 199.183883666992 | 0.02 |   | 1 |  |   |
| ;     |                  |      |   |   |  |   |
| 24136 | 204.023742675781 | 0.02 |   | 1 |  |   |
| ;     |                  |      |   |   |  |   |
| 24137 | 205.591506958008 | 0.03 |   | 1 |  |   |
| ;     |                  |      |   |   |  |   |
| 24138 | 199.674514770508 | 0.05 |   | 1 |  |   |
| ;     |                  |      |   |   |  |   |
| 24139 | 197.307907104492 | 0.00 |   | 1 |  |   |
| ;     |                  |      |   |   |  |   |
| 24140 | 218.249008178711 | 0.00 |   | 1 |  |   |
| ;     |                  |      |   |   |  |   |
| 24141 | 205              | 0.05 | 1 |   |  | ; |
| 24142 | 206.921981811523 | 0.03 |   | 1 |  |   |
| ;     |                  |      |   |   |  |   |
| 24143 | 206.931015014648 | 0.08 |   | 1 |  |   |
| ;     |                  |      |   |   |  |   |
| 24144 | 206.738098144531 | 0.01 |   | 1 |  |   |
| ;     |                  |      |   |   |  |   |
| 24145 | 206.729370117187 | 0.01 |   | 1 |  |   |
| ;     |                  |      |   |   |  |   |
| 24146 | 206.741302490234 | 0.03 |   | 1 |  |   |
| ;     |                  |      |   |   |  |   |
| 24147 | 208.131881713867 | 0.04 |   | 1 |  |   |
| ;     |                  |      |   |   |  |   |
| 24148 | 210.435363769531 | 0.15 |   | 1 |  |   |
| ;     |                  |      |   |   |  |   |
| 24149 | 209.976165771484 | 0.00 |   | 1 |  |   |
| ;     |                  |      |   |   |  |   |
| 24150 | 209.954284667969 | 0.03 |   | 1 |  |   |
| ;     |                  |      |   |   |  |   |
| 24151 | 208.362731933594 | 0.04 |   | 1 |  |   |
| ;     |                  |      |   |   |  |   |
| 24152 | 209.226776123047 | 0.01 |   | 1 |  |   |
| ;     |                  |      |   |   |  |   |

|       |                  |      |   |   |
|-------|------------------|------|---|---|
| 24153 | 197.278656005859 | 0.10 | 1 |   |
| ;     |                  |      |   |   |
| 24154 | 197.952987670898 | 0.02 | 1 |   |
| ;     |                  |      |   |   |
| 24155 | 200.842987060547 | 0.02 | 1 |   |
| ;     |                  |      |   |   |
| 24156 | 201.080200195313 | 0.01 | 1 |   |
| ;     |                  |      |   |   |
| 24157 | 202.385101318359 | 0.00 | 1 |   |
| ;     |                  |      |   |   |
| 24158 | 202.37956237793  | 0.02 | 1 | ; |
| 24159 | 196.948638916016 | 0.05 | 1 |   |
| ;     |                  |      |   |   |
| 24160 | 195.12971496582  | 0.00 | 1 | ; |
| 24161 | 195.041137695313 | 0.00 | 1 |   |
| ;     |                  |      |   |   |
| 24162 | 202.249862670898 | 0.00 | 1 |   |
| ;     |                  |      |   |   |
| 24163 | 197.862701416016 | 0.00 | 1 |   |
| ;     |                  |      |   |   |
| 24164 | 197.485198974609 | 0.00 | 1 |   |
| ;     |                  |      |   |   |
| 24165 | 204.917984008789 | 0.00 | 1 |   |
| ;     |                  |      |   |   |
| 24166 | 201.087768554687 | 0.01 | 1 |   |
| ;     |                  |      |   |   |
| 24167 | 207.114105224609 | 0.01 | 1 |   |
| ;     |                  |      |   |   |
| 24168 | 206.610748291016 | 0.09 | 1 |   |
| ;     |                  |      |   |   |
| 24169 | 207.974853515625 | 0.03 | 1 |   |
| ;     |                  |      |   |   |
| 24170 | 207.014450073242 | 0.01 | 1 |   |
| ;     |                  |      |   |   |
| 24171 | 207.006362915039 | 0.02 | 1 |   |
| ;     |                  |      |   |   |
| 24172 | 206.431442260742 | 0.03 | 1 |   |
| ;     |                  |      |   |   |
| 24173 | 203.133270263672 | 0.00 | 1 |   |
| ;     |                  |      |   |   |
| 24174 | 209.245391845703 | 0.01 | 1 |   |
| ;     |                  |      |   |   |
| 24175 | 232.142303466797 | 0.02 | 1 |   |
| ;     |                  |      |   |   |
| 24176 | 201.678558349609 | 0.02 | 1 |   |
| ;     |                  |      |   |   |
| 24177 | 234.095504760742 | 0.00 | 1 |   |
| ;     |                  |      |   |   |
| 24178 | 234.201934814453 | 0.00 | 1 |   |
| ;     |                  |      |   |   |

|       |                  |      |   |   |
|-------|------------------|------|---|---|
| 24179 | 208.048645019531 | 0.04 | 1 |   |
| ;     |                  |      |   |   |
| 24180 | 208.728988647461 | 0.00 | 1 |   |
| ;     |                  |      |   |   |
| 24181 | 206.547821044922 | 0.05 | 1 |   |
| ;     |                  |      |   |   |
| 24182 | 200              | 0.03 | 1 | ; |
| 24183 | 200              | 0.03 | 1 | ; |
| 24184 | 200              | 0.01 | 1 | ; |
| 24185 | 200              | 0.01 | 1 | ; |
| 24186 | 202.984771728516 | 0.02 | 1 |   |
| ;     |                  |      |   |   |
| 24187 | 204.136734008789 | 0.02 | 1 |   |
| ;     |                  |      |   |   |
| 24188 | 204.148651123047 | 0.09 | 1 |   |
| ;     |                  |      |   |   |
| 24189 | 204.124877929688 | 0.00 | 1 |   |
| ;     |                  |      |   |   |
| 24190 | 204.549758911133 | 0.05 | 1 |   |
| ;     |                  |      |   |   |
| 24191 | 203.051406860352 | 0.01 | 1 |   |
| ;     |                  |      |   |   |
| 24192 | 203.025497436523 | 0.07 | 1 |   |
| ;     |                  |      |   |   |
| 24193 | 200.016983032227 | 0.06 | 1 |   |
| ;     |                  |      |   |   |
| 24194 | 200.328170776367 | 0.04 | 1 |   |
| ;     |                  |      |   |   |
| 24195 | 200.804382324219 | 0.00 | 1 |   |
| ;     |                  |      |   |   |
| 24196 | 206.997024536133 | 0.04 | 1 |   |
| ;     |                  |      |   |   |
| 24197 | 217.299758911133 | 0.00 | 1 |   |
| ;     |                  |      |   |   |
| 24198 | 201.70051574707  | 0.00 | 1 | ; |
| 24199 | 201.80419921875  | 0.01 | 1 | ; |
| 24200 | 201.793640136719 | 0.01 | 1 |   |
| ;     |                  |      |   |   |
| 24201 | 199.815078735352 | 0.00 | 1 |   |
| ;     |                  |      |   |   |
| 24202 | 197.138580322266 | 0.02 | 1 |   |
| ;     |                  |      |   |   |
| 24203 | 208.064361572266 | 0.04 | 1 |   |
| ;     |                  |      |   |   |
| 24204 | 207.405838012695 | 0.03 | 1 |   |
| ;     |                  |      |   |   |
| 24205 | 208.045135498047 | 0.04 | 1 |   |
| ;     |                  |      |   |   |
| 24206 | 208.396209716797 | 0.09 | 1 |   |
| ;     |                  |      |   |   |

|       |                  |      |   |   |
|-------|------------------|------|---|---|
| 24207 | 214.987945556641 | 0.05 | 1 |   |
| ;     |                  |      |   |   |
| 24208 | 214.662567138672 | 0.00 | 1 |   |
| ;     |                  |      |   |   |
| 24209 | 214.67546081543  | 0.01 | 1 | ; |
| 24210 | 202.408660888672 | 0.03 | 1 |   |
| ;     |                  |      |   |   |
| 24211 | 206.158920288086 | 0.05 | 1 |   |
| ;     |                  |      |   |   |
| 24212 | 206.162475585938 | 0.02 | 1 |   |
| ;     |                  |      |   |   |
| 24213 | 211.29362487793  | 0.02 | 1 | ; |
| 24214 | 197.423980712891 | 0.03 | 1 |   |
| ;     |                  |      |   |   |
| 24215 | 195.151000976563 | 0.00 | 1 |   |
| ;     |                  |      |   |   |
| 24216 | 195.130859375    | 0.00 | 1 | ; |
| 24217 | 207.319610595703 | 0.04 | 1 |   |
| ;     |                  |      |   |   |
| 24218 | 206.714324951172 | 0.01 | 1 |   |
| ;     |                  |      |   |   |
| 24219 | 208.192138671875 | 0.00 | 1 |   |
| ;     |                  |      |   |   |
| 24220 | 205.556625366211 | 0.04 | 1 |   |
| ;     |                  |      |   |   |
| 24221 | 206.264678955078 | 0.00 | 1 |   |
| ;     |                  |      |   |   |
| 24222 | 206.329666137695 | 0.02 | 1 |   |
| ;     |                  |      |   |   |
| 24223 | 206.316665649414 | 0.00 | 1 |   |
| ;     |                  |      |   |   |
| 24224 | 208.120101928711 | 0.05 | 1 |   |
| ;     |                  |      |   |   |
| 24225 | 201.887115478516 | 0.01 | 1 |   |
| ;     |                  |      |   |   |
| 24226 | 200              | 0.02 | 1 | ; |
| 24227 | 194.75602722168  | 0.06 | 1 | ; |
| 24228 | 198.624069213867 | 0.00 | 1 |   |
| ;     |                  |      |   |   |
| 24229 | 212.094573974609 | 0.06 | 1 |   |
| ;     |                  |      |   |   |
| 24230 | 214.68537902832  | 0.07 | 1 | ; |
| 24231 | 215.014434814453 | 0.00 | 1 |   |
| ;     |                  |      |   |   |
| 24232 | 221.180877685547 | 0.01 | 1 |   |
| ;     |                  |      |   |   |
| 24233 | 221.460906982422 | 0.06 | 1 |   |
| ;     |                  |      |   |   |
| 24234 | 212.317459106445 | 0.05 | 1 |   |
| ;     |                  |      |   |   |

|       |                  |      |   |   |
|-------|------------------|------|---|---|
| 24235 | 213.281890869141 | 0.02 | 1 |   |
| ;     |                  |      |   |   |
| 24236 | 220              | 0.01 | 1 | ; |
| 24237 | 215.612686157227 | 0.00 | 1 |   |
| ;     |                  |      |   |   |
| 24238 | 232.905471801758 | 0.00 | 1 |   |
| ;     |                  |      |   |   |
| 24239 | 232.351348876953 | 0.00 | 1 |   |
| ;     |                  |      |   |   |
| 24240 | 209.968597412109 | 0.01 | 1 |   |
| ;     |                  |      |   |   |
| 24241 | 212.088043212891 | 0.02 | 1 |   |
| ;     |                  |      |   |   |
| 24242 | 235.038208007812 | 0.01 | 1 |   |
| ;     |                  |      |   |   |
| 24243 | 219.757446289063 | 0.00 | 1 |   |
| ;     |                  |      |   |   |
| 24244 | 221.192810058594 | 0.01 | 1 |   |
| ;     |                  |      |   |   |
| 24245 | 203.516662597656 | 0.02 | 1 |   |
| ;     |                  |      |   |   |
| 24246 | 201.553527832031 | 0.04 | 1 |   |
| ;     |                  |      |   |   |
| 24247 | 222.264877319336 | 0.02 | 1 |   |
| ;     |                  |      |   |   |
| 24248 | 222.049118041992 | 0.01 | 1 |   |
| ;     |                  |      |   |   |
| 24249 | 222.050201416016 | 0.02 | 1 |   |
| ;     |                  |      |   |   |
| 24250 | 206.113952636719 | 0.01 | 1 |   |
| ;     |                  |      |   |   |
| 24251 | 207.709548950195 | 0.12 | 1 |   |
| ;     |                  |      |   |   |
| 24252 | 207.718063354492 | 0.04 | 1 |   |
| ;     |                  |      |   |   |
| 24253 | 214.961700439453 | 0.00 | 1 |   |
| ;     |                  |      |   |   |
| 24254 | 233.2412109375   | 0.00 | 1 | ; |
| 24255 | 194.984710693359 | 0.04 | 1 |   |
| ;     |                  |      |   |   |
| 24256 | 206.277679443359 | 0.00 | 1 |   |
| ;     |                  |      |   |   |
| 24257 | 219.882400512695 | 0.00 | 1 |   |
| ;     |                  |      |   |   |
| 24258 | 218.560791015625 | 0.07 | 1 |   |
| ;     |                  |      |   |   |
| 24259 | 201.194686889648 | 0.05 | 1 |   |
| ;     |                  |      |   |   |
| 24260 | 204.254501342773 | 0.01 | 1 |   |
| ;     |                  |      |   |   |



|       |                  |      |   |  |
|-------|------------------|------|---|--|
| 24261 | 215.85954284668  | 0.04 | 1 |  |
| 24262 | 214.145355224609 | 0.03 | 1 |  |
| ;     |                  |      |   |  |
| 24263 | 211.346801757813 | 0.03 | 1 |  |
| ;     |                  |      |   |  |
| 24264 | 214.606491088867 | 0.02 | 1 |  |
| ;     |                  |      |   |  |
| 24265 | 205              | 0.02 | 1 |  |
| 24266 | 195.785919189453 | 0.00 | 1 |  |
| ;     |                  |      |   |  |
| 24267 | 194.902954101563 | 0.00 | 1 |  |
| ;     |                  |      |   |  |
| 24268 | 200              | 0.02 | 1 |  |
| 24269 | 201.782913208008 | 0.08 | 1 |  |
| ;     |                  |      |   |  |
| 24270 | 204.877319335938 | 0.10 | 1 |  |
| ;     |                  |      |   |  |
| 24271 | 202.871734619141 | 0.16 | 1 |  |
| ;     |                  |      |   |  |
| 24272 | 203.071334838867 | 0.03 | 1 |  |
| ;     |                  |      |   |  |
| 24273 | 200              | 0.02 | 1 |  |
| 24274 | 204.429809570313 | 0.01 | 1 |  |
| ;     |                  |      |   |  |
| 24275 | 197.275665283203 | 0.05 | 1 |  |
| ;     |                  |      |   |  |
| 24276 | 228.533187866211 | 0.04 | 1 |  |
| ;     |                  |      |   |  |
| 24277 | 229.625457763672 | 0.01 | 1 |  |
| ;     |                  |      |   |  |
| 24278 | 213.920364379883 | 0.05 | 1 |  |
| ;     |                  |      |   |  |
| 24279 | 208.969329833984 | 0.02 | 1 |  |
| ;     |                  |      |   |  |
| 24280 | 207.528106689453 | 0.00 | 1 |  |
| ;     |                  |      |   |  |
| 24281 | 199.81608581543  | 0.00 | 1 |  |
| 24282 | 200              | 0.01 | 1 |  |
| 24283 | 201.557235717773 | 0.02 | 1 |  |
| ;     |                  |      |   |  |
| 24284 | 200              | 0.02 | 1 |  |
| 24285 | 202.645370483398 | 0.14 | 1 |  |
| ;     |                  |      |   |  |
| 24286 | 200.31803894043  | 0.03 | 1 |  |
| 24287 | 200              | 0.03 | 1 |  |
| 24288 | 201.237731933594 | 0.00 | 1 |  |
| ;     |                  |      |   |  |
| 24289 | 206.156723022461 | 0.11 | 1 |  |
| ;     |                  |      |   |  |
| 24290 | 206.799468994141 | 0.01 | 1 |  |

|       |                  |      |   |   |   |
|-------|------------------|------|---|---|---|
| ;     |                  |      |   |   |   |
| 24291 | 194.280197143555 | 0.00 |   | 1 |   |
| ;     |                  |      |   |   |   |
| 24292 | 203.279296875    | 0.00 | 1 |   | ; |
| 24293 | 200.460494995117 | 0.03 |   | 1 |   |
| ;     |                  |      |   |   |   |
| 24294 | 199.834747314453 | 0.02 |   | 1 |   |
| ;     |                  |      |   |   |   |
| 24295 | 199.383834838867 | 0.02 |   | 1 |   |
| ;     |                  |      |   |   |   |
| 24296 | 202.065017700195 | 0.03 |   | 1 |   |
| ;     |                  |      |   |   |   |
| 24297 | 202.243515014648 | 0.02 |   | 1 |   |
| ;     |                  |      |   |   |   |
| 24298 | 221.407043457031 | 0.00 |   | 1 |   |
| ;     |                  |      |   |   |   |
| 24299 | 221.439300537109 | 0.00 |   | 1 |   |
| ;     |                  |      |   |   |   |
| 24300 | 210.926712036133 | 0.04 |   | 1 |   |
| ;     |                  |      |   |   |   |
| 24301 | 213.772613525391 | 0.03 |   | 1 |   |
| ;     |                  |      |   |   |   |
| 24302 | 197.661239624023 | 0.00 |   | 1 |   |
| ;     |                  |      |   |   |   |
| 24303 | 193.667587280273 | 0.05 |   | 1 |   |
| ;     |                  |      |   |   |   |
| 24304 | 194.12956237793  | 0.05 | 1 |   | ; |
| 24305 | 201.720672607422 | 0.00 |   | 1 |   |
| ;     |                  |      |   |   |   |
| 24306 | 198.247161865234 | 0.00 |   | 1 |   |
| ;     |                  |      |   |   |   |
| 24307 | 209.489059448242 | 0.00 |   | 1 |   |
| ;     |                  |      |   |   |   |
| 24308 | 204.650680541992 | 0.00 |   | 1 |   |
| ;     |                  |      |   |   |   |
| 24309 | 204.643981933594 | 0.00 |   | 1 |   |
| ;     |                  |      |   |   |   |
| 24310 | 204.634963989258 | 0.01 |   | 1 |   |
| ;     |                  |      |   |   |   |
| 24311 | 204.649810791016 | 0.00 |   | 1 |   |
| ;     |                  |      |   |   |   |
| 24312 | 204.619689941406 | 0.01 |   | 1 |   |
| ;     |                  |      |   |   |   |
| 24313 | 203.324890136719 | 0.01 |   | 1 |   |
| ;     |                  |      |   |   |   |
| 24314 | 203.339294433594 | 0.00 |   | 1 |   |
| ;     |                  |      |   |   |   |
| 24315 | 203.629425048828 | 0.01 |   | 1 |   |
| ;     |                  |      |   |   |   |
| 24316 | 203.831115722656 | 0.01 |   | 1 |   |

|       |                  |      |   |  |   |
|-------|------------------|------|---|--|---|
| ;     |                  |      |   |  |   |
| 24317 | 202.415023803711 | 0.04 | 1 |  |   |
| ;     |                  |      |   |  |   |
| 24318 | 202.120758056641 | 0.02 | 1 |  |   |
| ;     |                  |      |   |  |   |
| 24319 | 204.359817504883 | 0.02 | 1 |  |   |
| ;     |                  |      |   |  |   |
| 24320 | 220.558471679688 | 0.00 | 1 |  |   |
| ;     |                  |      |   |  |   |
| 24321 | 206.078231811523 | 0.01 | 1 |  |   |
| ;     |                  |      |   |  |   |
| 24322 | 218.336563110352 | 0.04 | 1 |  |   |
| ;     |                  |      |   |  |   |
| 24323 | 218.338134765625 | 0.03 | 1 |  |   |
| ;     |                  |      |   |  |   |
| 24324 | 205.212860107422 | 0.05 | 1 |  |   |
| ;     |                  |      |   |  |   |
| 24325 | 206.071701049805 | 0.01 | 1 |  |   |
| ;     |                  |      |   |  |   |
| 24326 | 219.289886474609 | 0.00 | 1 |  |   |
| ;     |                  |      |   |  |   |
| 24327 | 215.581558227539 | 0.00 | 1 |  |   |
| ;     |                  |      |   |  |   |
| 24328 | 221.676208496094 | 0.04 | 1 |  |   |
| ;     |                  |      |   |  |   |
| 24329 | 221.213333129883 | 0.08 | 1 |  |   |
| ;     |                  |      |   |  |   |
| 24330 | 200.041549682617 | 0.01 | 1 |  |   |
| ;     |                  |      |   |  |   |
| 24331 | 201.015213012695 | 0.02 | 1 |  |   |
| ;     |                  |      |   |  |   |
| 24332 | 201.028930664063 | 0.00 | 1 |  |   |
| ;     |                  |      |   |  |   |
| 24333 | 197.461303710938 | 0.01 | 1 |  |   |
| ;     |                  |      |   |  |   |
| 24334 | 200.948135375977 | 0.00 | 1 |  |   |
| ;     |                  |      |   |  |   |
| 24335 | 223.578201293945 | 0.03 | 1 |  |   |
| ;     |                  |      |   |  |   |
| 24336 | 223.590881347656 | 0.00 | 1 |  |   |
| ;     |                  |      |   |  |   |
| 24337 | 214.41667175293  | 0.03 | 1 |  | ; |
| 24338 | 214.39176940918  | 0.06 | 1 |  | ; |
| 24339 | 205.963119506836 | 0.00 | 1 |  |   |
| ;     |                  |      |   |  |   |
| 24340 | 205.92155456543  | 0.01 | 1 |  | ; |
| 24341 | 198.839294433594 | 0.06 | 1 |  |   |
| ;     |                  |      |   |  |   |
| 24342 | 198.849456787109 | 0.00 | 1 |  |   |
| ;     |                  |      |   |  |   |

|       |                  |      |   |   |
|-------|------------------|------|---|---|
| 24343 | 194.676681518555 | 0.05 | 1 |   |
| ;     |                  |      |   |   |
| 24344 | 194.516479492188 | 0.05 | 1 |   |
| ;     |                  |      |   |   |
| 24345 | 194.245651245117 | 0.01 | 1 |   |
| ;     |                  |      |   |   |
| 24346 | 193.569396972656 | 0.02 | 1 |   |
| ;     |                  |      |   |   |
| 24347 | 194.051605224609 | 0.02 | 1 |   |
| ;     |                  |      |   |   |
| 24348 | 200              | 0.04 | 1 | ; |
| 24349 | 199.04118347168  | 0.02 | 1 | ; |
| 24350 | 198.847396850586 | 0.00 | 1 |   |
| ;     |                  |      |   |   |
| 24351 | 216.388214111328 | 0.01 | 1 |   |
| ;     |                  |      |   |   |
| 24352 | 217.623321533203 | 0.01 | 1 |   |
| ;     |                  |      |   |   |
| 24353 | 216.878875732422 | 0.01 | 1 |   |
| ;     |                  |      |   |   |
| 24354 | 193.039566040039 | 0.02 | 1 |   |
| ;     |                  |      |   |   |
| 24355 | 192.558837890625 | 0.01 | 1 |   |
| ;     |                  |      |   |   |
| 24356 | 192.351516723633 | 0.05 | 1 |   |
| ;     |                  |      |   |   |
| 24357 | 192.353485107422 | 0.03 | 1 |   |
| ;     |                  |      |   |   |
| 24358 | 191.698944091797 | 0.01 | 1 |   |
| ;     |                  |      |   |   |
| 24359 | 192.111190795898 | 0.03 | 1 |   |
| ;     |                  |      |   |   |
| 24360 | 192.79736328125  | 0.03 | 1 | ; |
| 24361 | 195              | 0.00 | 1 | ; |
| 24362 | 195              | 0.00 | 1 | ; |
| 24363 | 195              | 0.01 | 1 | ; |
| 24364 | 195.418411254883 | 0.01 | 1 |   |
| ;     |                  |      |   |   |
| 24365 | 195.484085083008 | 0.02 | 1 |   |
| ;     |                  |      |   |   |
| 24366 | 204.316528320313 | 0.00 | 1 |   |
| ;     |                  |      |   |   |
| 24367 | 217.294906616211 | 0.00 | 1 |   |
| ;     |                  |      |   |   |
| 24368 | 203.100036621094 | 0.02 | 1 |   |
| ;     |                  |      |   |   |
| 24369 | 204.463134765625 | 0.01 | 1 |   |
| ;     |                  |      |   |   |
| 24370 | 206.369232177734 | 0.03 | 1 |   |
| ;     |                  |      |   |   |

|       |                  |      |   |   |
|-------|------------------|------|---|---|
| 24371 | 198.312545776367 | 0.00 | 1 |   |
| ;     |                  |      |   |   |
| 24372 | 200.385391235352 | 0.02 | 1 |   |
| ;     |                  |      |   |   |
| 24373 | 201.119400024414 | 0.00 | 1 |   |
| ;     |                  |      |   |   |
| 24374 | 201.110275268555 | 0.00 | 1 |   |
| ;     |                  |      |   |   |
| 24375 | 200.943634033203 | 0.06 | 1 |   |
| ;     |                  |      |   |   |
| 24376 | 200.943008422852 | 0.01 | 1 |   |
| ;     |                  |      |   |   |
| 24377 | 200.931198120117 | 0.00 | 1 |   |
| ;     |                  |      |   |   |
| 24378 | 199.265609741211 | 0.01 | 1 |   |
| ;     |                  |      |   |   |
| 24379 | 218.125640869141 | 0.00 | 1 |   |
| ;     |                  |      |   |   |
| 24380 | 205.131973266602 | 0.01 | 1 |   |
| ;     |                  |      |   |   |
| 24381 | 209.999923706055 | 0.00 | 1 |   |
| ;     |                  |      |   |   |
| 24382 | 209.987777709961 | 0.00 | 1 |   |
| ;     |                  |      |   |   |
| 24383 | 209.996017456055 | 0.33 | 1 |   |
| ;     |                  |      |   |   |
| 24384 | 199.23486328125  | 0.01 | 1 | ; |
| 24385 | 200              | 0.02 | 1 | ; |
| 24386 | 200.689834594727 | 0.03 | 1 |   |
| ;     |                  |      |   |   |
| 24387 | 194.242279052734 | 0.00 | 1 |   |
| ;     |                  |      |   |   |
| 24388 | 205              | 0.02 | 1 | ; |
| 24389 | 198.969085693359 | 0.03 | 1 |   |
| ;     |                  |      |   |   |
| 24390 | 206.068786621094 | 0.00 | 1 |   |
| ;     |                  |      |   |   |
| 24391 | 214.621643066406 | 0.02 | 1 |   |
| ;     |                  |      |   |   |
| 24392 | 214.341018676758 | 0.02 | 1 |   |
| ;     |                  |      |   |   |
| 24393 | 214.567306518555 | 0.09 | 1 |   |
| ;     |                  |      |   |   |
| 24394 | 199.692123413086 | 0.01 | 1 |   |
| ;     |                  |      |   |   |
| 24395 | 199.433609008789 | 0.03 | 1 |   |
| ;     |                  |      |   |   |
| 24396 | 199.579605102539 | 0.01 | 1 |   |
| ;     |                  |      |   |   |
| 24397 | 199.802062988281 | 0.01 | 1 |   |

|       |                  |      |   |   |
|-------|------------------|------|---|---|
| ;     |                  |      |   |   |
| 24398 | 219.999496459961 | 0.03 | 1 |   |
| ;     |                  |      |   |   |
| 24399 | 220.875213623047 | 0.03 | 1 |   |
| ;     |                  |      |   |   |
| 24400 | 221.218383789063 | 0.03 | 1 |   |
| ;     |                  |      |   |   |
| 24401 | 221.007904052734 | 0.00 | 1 |   |
| ;     |                  |      |   |   |
| 24402 | 221.126754760742 | 0.02 | 1 |   |
| ;     |                  |      |   |   |
| 24403 | 220.710067749023 | 0.01 | 1 |   |
| ;     |                  |      |   |   |
| 24404 | 221.141372680664 | 0.00 | 1 |   |
| ;     |                  |      |   |   |
| 24405 | 198.765686035156 | 0.02 | 1 |   |
| ;     |                  |      |   |   |
| 24406 | 198.816833496094 | 0.03 | 1 |   |
| ;     |                  |      |   |   |
| 24407 | 198.397689819336 | 0.02 | 1 |   |
| ;     |                  |      |   |   |
| 24408 | 197.619338989258 | 0.02 | 1 |   |
| ;     |                  |      |   |   |
| 24409 | 198.449615478516 | 0.01 | 1 |   |
| ;     |                  |      |   |   |
| 24410 | 198.687835693359 | 0.01 | 1 |   |
| ;     |                  |      |   |   |
| 24411 | 198.614929199219 | 0.02 | 1 |   |
| ;     |                  |      |   |   |
| 24412 | 199.064056396484 | 0.01 | 1 |   |
| ;     |                  |      |   |   |
| 24413 | 217.624954223633 | 0.02 | 1 |   |
| ;     |                  |      |   |   |
| 24414 | 218.239486694336 | 0.02 | 1 |   |
| ;     |                  |      |   |   |
| 24415 | 199.099609375    | 0.03 | 1 |   |
| 24416 | 221.344512939453 | 0.00 | 1 | ; |
| ;     |                  |      |   |   |
| 24417 | 198.384094238281 | 0.02 | 1 |   |
| ;     |                  |      |   |   |
| 24418 | 198.057846069336 | 0.03 | 1 |   |
| ;     |                  |      |   |   |
| 24419 | 197.932342529297 | 0.01 | 1 |   |
| ;     |                  |      |   |   |
| 24420 | 216.691787719727 | 0.00 | 1 |   |
| ;     |                  |      |   |   |
| 24421 | 216.659530639648 | 0.00 | 1 |   |
| ;     |                  |      |   |   |
| 24422 | 198.845321655273 | 0.01 | 1 |   |
| ;     |                  |      |   |   |

|       |                  |      |   |   |  |  |
|-------|------------------|------|---|---|--|--|
| 24423 | 199.24739074707  | 0.01 | 1 |   |  |  |
| 24424 | 199.886123657227 | 0.01 |   | 1 |  |  |
| ;     |                  |      |   |   |  |  |
| 24425 | 197.966934204102 | 0.00 |   | 1 |  |  |
| ;     |                  |      |   |   |  |  |
| 24426 | 197.975479125977 | 0.00 |   | 1 |  |  |
| ;     |                  |      |   |   |  |  |
| 24427 | 198.000946044922 | 0.01 |   | 1 |  |  |
| ;     |                  |      |   |   |  |  |
| 24428 | 198.052749633789 | 0.01 |   | 1 |  |  |
| ;     |                  |      |   |   |  |  |
| 24429 | 197.688217163086 | 0.00 |   | 1 |  |  |
| ;     |                  |      |   |   |  |  |
| 24430 | 198.217727661133 | 0.00 |   | 1 |  |  |
| ;     |                  |      |   |   |  |  |
| 24431 | 198.330505371094 | 0.00 |   | 1 |  |  |
| ;     |                  |      |   |   |  |  |
| 24432 | 196.431884765625 | 0.07 |   | 1 |  |  |
| ;     |                  |      |   |   |  |  |
| 24433 | 197.569686889648 | 0.02 |   | 1 |  |  |
| ;     |                  |      |   |   |  |  |
| 24434 | 196.741256713867 | 0.03 |   | 1 |  |  |
| ;     |                  |      |   |   |  |  |
| 24435 | 195.938110351563 | 0.01 |   | 1 |  |  |
| ;     |                  |      |   |   |  |  |
| 24436 | 195.695083618164 | 0.04 |   | 1 |  |  |
| ;     |                  |      |   |   |  |  |
| 24437 | 195.386016845703 | 0.04 |   | 1 |  |  |
| ;     |                  |      |   |   |  |  |
| 24438 | 196.237655639648 | 0.00 |   | 1 |  |  |
| ;     |                  |      |   |   |  |  |
| 24439 | 196.214233398438 | 0.00 |   | 1 |  |  |
| ;     |                  |      |   |   |  |  |
| 24440 | 196.244644165039 | 0.00 |   | 1 |  |  |
| ;     |                  |      |   |   |  |  |
| 24441 | 195              | 0.00 | 1 |   |  |  |
| 24442 | 195              | 0.00 | 1 |   |  |  |
| 24443 | 196.648849487305 | 0.02 |   | 1 |  |  |
| ;     |                  |      |   |   |  |  |
| 24444 | 195.566268920898 | 0.01 |   | 1 |  |  |
| ;     |                  |      |   |   |  |  |
| 24445 | 195.521575927734 | 0.00 |   | 1 |  |  |
| ;     |                  |      |   |   |  |  |
| 24446 | 195.051040649414 | 0.00 |   | 1 |  |  |
| ;     |                  |      |   |   |  |  |
| 24447 | 195.217620849609 | 0.01 |   | 1 |  |  |
| ;     |                  |      |   |   |  |  |
| 24448 | 195.652008056641 | 0.03 |   | 1 |  |  |
| ;     |                  |      |   |   |  |  |
| 24449 | 197.309295654297 | 0.02 |   | 1 |  |  |

|       |                  |      |   |   |
|-------|------------------|------|---|---|
| ;     |                  |      |   |   |
| 24450 | 198.260177612305 | 0.03 | 1 |   |
| ;     |                  |      |   |   |
| 24451 | 198.291397094727 | 0.05 | 1 |   |
| ;     |                  |      |   |   |
| 24452 | 198.805374145508 | 0.02 | 1 |   |
| ;     |                  |      |   |   |
| 24453 | 198.327865600586 | 0.01 | 1 |   |
| ;     |                  |      |   |   |
| 24454 | 193.971466064453 | 0.02 | 1 |   |
| ;     |                  |      |   |   |
| 24455 | 193.976348876953 | 0.00 | 1 |   |
| ;     |                  |      |   |   |
| 24456 | 194.056762695313 | 0.04 | 1 |   |
| ;     |                  |      |   |   |
| 24457 | 193.922424316406 | 0.04 | 1 |   |
| ;     |                  |      |   |   |
| 24458 | 193.979339599609 | 0.00 | 1 |   |
| ;     |                  |      |   |   |
| 24459 | 192.967727661133 | 0.01 | 1 |   |
| ;     |                  |      |   |   |
| 24460 | 193.172927856445 | 0.02 | 1 |   |
| ;     |                  |      |   |   |
| 24461 | 211.293212890625 | 0.01 | 1 |   |
| ;     |                  |      |   |   |
| 24462 | 196.497985839844 | 0.03 | 1 |   |
| ;     |                  |      |   |   |
| 24463 | 196.271362304688 | 0.01 | 1 |   |
| ;     |                  |      |   |   |
| 24464 | 196.642807006836 | 0.02 | 1 |   |
| ;     |                  |      |   |   |
| 24465 | 196.64924621582  | 0.04 | 1 | ; |
| 24466 | 196.385040283203 | 0.06 | 1 |   |
| ;     |                  |      |   |   |
| 24467 | 196.826553344727 | 0.01 | 1 |   |
| ;     |                  |      |   |   |
| 24468 | 201.75048828125  | 0.05 | 1 | ; |
| 24469 | 201.118270874023 | 0.06 | 1 |   |
| ;     |                  |      |   |   |
| 24470 | 201.345504760742 | 0.02 | 1 |   |
| ;     |                  |      |   |   |
| 24471 | 200.706634521484 | 0.06 | 1 |   |
| ;     |                  |      |   |   |
| 24472 | 200.75016784668  | 0.03 | 1 | ; |
| 24473 | 200.473556518555 | 0.03 | 1 |   |
| ;     |                  |      |   |   |
| 24474 | 198.027114868164 | 0.02 | 1 |   |
| ;     |                  |      |   |   |
| 24475 | 197.955703735352 | 0.02 | 1 |   |
| ;     |                  |      |   |   |



|       |                      |      |  |   |  |  |  |
|-------|----------------------|------|--|---|--|--|--|
| 24476 | 197.90592956543 0.00 | 1    |  |   |  |  |  |
| 24477 | 198.317916870117     | 0.03 |  | 1 |  |  |  |
| ;     |                      |      |  |   |  |  |  |
| 24478 | 195.852432250977     | 0.05 |  | 1 |  |  |  |
| ;     |                      |      |  |   |  |  |  |
| 24479 | 196.045532226563     | 0.05 |  | 1 |  |  |  |
| ;     |                      |      |  |   |  |  |  |
| 24480 | 197.31298828125 0.01 | 1    |  |   |  |  |  |
| 24481 | 197.262786865234     | 0.02 |  | 1 |  |  |  |
| ;     |                      |      |  |   |  |  |  |
| 24482 | 196.882400512695     | 0.03 |  | 1 |  |  |  |
| ;     |                      |      |  |   |  |  |  |
| 24483 | 197.022277832031     | 0.00 |  | 1 |  |  |  |
| ;     |                      |      |  |   |  |  |  |
| 24484 | 197.520874023438     | 0.06 |  | 1 |  |  |  |
| ;     |                      |      |  |   |  |  |  |
| 24485 | 197.117553710938     | 0.01 |  | 1 |  |  |  |
| ;     |                      |      |  |   |  |  |  |
| 24486 | 197.307235717773     | 0.01 |  | 1 |  |  |  |
| ;     |                      |      |  |   |  |  |  |
| 24487 | 197.073272705078     | 0.02 |  | 1 |  |  |  |
| ;     |                      |      |  |   |  |  |  |
| 24488 | 196.824111938477     | 0.01 |  | 1 |  |  |  |
| ;     |                      |      |  |   |  |  |  |
| 24489 | 196.83235168457 0.01 | 1    |  |   |  |  |  |
| 24490 | 196.76887512207 0.04 | 1    |  |   |  |  |  |
| 24491 | 196.464508056641     | 0.03 |  | 1 |  |  |  |
| ;     |                      |      |  |   |  |  |  |
| 24492 | 196.130889892578     | 0.08 |  | 1 |  |  |  |
| ;     |                      |      |  |   |  |  |  |
| 24493 | 196.158966064453     | 0.02 |  | 1 |  |  |  |
| ;     |                      |      |  |   |  |  |  |
| 24494 | 196.163711547852     | 0.02 |  | 1 |  |  |  |
| ;     |                      |      |  |   |  |  |  |
| 24495 | 196.16796875 0.01    | 1    |  |   |  |  |  |
| 24496 | 196.300521850586     | 0.01 |  | 1 |  |  |  |
| ;     |                      |      |  |   |  |  |  |
| 24497 | 197.348052978516     | 0.00 |  | 1 |  |  |  |
| ;     |                      |      |  |   |  |  |  |
| 24498 | 212.46598815918 0.00 | 1    |  |   |  |  |  |
| 24499 | 212.567321777344     | 0.00 |  | 1 |  |  |  |
| ;     |                      |      |  |   |  |  |  |
| 24500 | 219.248092651367     | 0.03 |  | 1 |  |  |  |
| ;     |                      |      |  |   |  |  |  |
| 24501 | 219.406311035156     | 0.04 |  | 1 |  |  |  |
| ;     |                      |      |  |   |  |  |  |
| 24502 | 218.154388427734     | 0.01 |  | 1 |  |  |  |
| ;     |                      |      |  |   |  |  |  |
| 24503 | 197.110565185547     | 0.02 |  | 1 |  |  |  |
| ;     |                      |      |  |   |  |  |  |

|       |                  |      |   |   |
|-------|------------------|------|---|---|
| 24504 | 195.00505065918  | 0.01 | 1 |   |
| 24505 | 195.012329101563 | 0.00 |   | 1 |
| ;     |                  |      |   |   |
| 24506 | 195.031463623047 | 0.01 |   | 1 |
| ;     |                  |      |   |   |
| 24507 | 195.111419677734 | 0.01 |   | 1 |
| ;     |                  |      |   |   |
| 24508 | 195.00553894043  | 0.00 | 1 |   |
| 24509 | 195.005752563477 | 0.00 |   | 1 |
| ;     |                  |      |   |   |
| 24510 | 194.623229980469 | 0.01 |   | 1 |
| ;     |                  |      |   |   |
| 24511 | 195.073165893555 | 0.02 |   | 1 |
| ;     |                  |      |   |   |
| 24512 | 195.34326171875  | 0.00 | 1 |   |
| 24513 | 195.393508911133 | 0.01 |   | 1 |
| ;     |                  |      |   |   |
| 24514 | 194.095657348633 | 0.03 |   | 1 |
| ;     |                  |      |   |   |
| 24515 | 195.036514282227 | 0.02 |   | 1 |
| ;     |                  |      |   |   |
| 24516 | 198.064407348633 | 0.01 |   | 1 |
| ;     |                  |      |   |   |
| 24517 | 212.975463867187 | 0.05 |   | 1 |
| ;     |                  |      |   |   |
| 24518 | 212.769271850586 | 0.04 |   | 1 |
| ;     |                  |      |   |   |
| 24519 | 197.932159423828 | 0.03 |   | 1 |
| ;     |                  |      |   |   |
| 24520 | 213.106018066406 | 0.01 |   | 1 |
| ;     |                  |      |   |   |
| 24521 | 212.370513916016 | 0.06 |   | 1 |
| ;     |                  |      |   |   |
| 24522 | 212.273651123047 | 0.01 |   | 1 |
| ;     |                  |      |   |   |
| 24523 | 212.816253662109 | 0.01 |   | 1 |
| ;     |                  |      |   |   |
| 24524 | 212.847534179688 | 0.01 |   | 1 |
| ;     |                  |      |   |   |
| 24525 | 212.797439575195 | 0.06 |   | 1 |
| ;     |                  |      |   |   |
| 24526 | 212.359954833984 | 0.16 |   | 1 |
| ;     |                  |      |   |   |
| 24527 | 213.181640625    | 0.07 | 1 |   |
| 24528 | 213.093872070312 | 0.03 |   | 1 |
| ;     |                  |      |   |   |
| 24529 | 211.67805480957  | 0.15 | 1 |   |
| 24530 | 210.079315185547 | 0.05 |   | 1 |
| ;     |                  |      |   |   |
| 24531 | 210.386505126953 | 0.07 |   | 1 |

|       |                  |      |   |   |   |
|-------|------------------|------|---|---|---|
| ;     |                  |      |   |   |   |
| 24532 | 210.521408081055 | 0.03 |   | 1 |   |
| ;     |                  |      |   |   |   |
| 24533 | 210.724212646484 | 0.01 |   | 1 |   |
| ;     |                  |      |   |   |   |
| 24534 | 210.760055541992 | 0.01 |   | 1 |   |
| ;     |                  |      |   |   |   |
| 24535 | 211.641860961914 | 0.15 |   | 1 |   |
| ;     |                  |      |   |   |   |
| 24536 | 212.179290771484 | 0.11 |   | 1 |   |
| ;     |                  |      |   |   |   |
| 24537 | 211.602310180664 | 0.15 |   | 1 |   |
| ;     |                  |      |   |   |   |
| 24538 | 210.654800415039 | 0.07 |   | 1 |   |
| ;     |                  |      |   |   |   |
| 24539 | 210.949081420898 | 0.10 |   | 1 |   |
| ;     |                  |      |   |   |   |
| 24540 | 211.296600341797 | 0.16 |   | 1 |   |
| ;     |                  |      |   |   |   |
| 24541 | 211.071975708008 | 0.15 |   | 1 |   |
| ;     |                  |      |   |   |   |
| 24542 | 212.641754150391 | 0.11 |   | 1 |   |
| ;     |                  |      |   |   |   |
| 24543 | 211.909774780273 | 0.12 |   | 1 |   |
| ;     |                  |      |   |   |   |
| 24544 | 210.633682250977 | 0.07 |   | 1 |   |
| ;     |                  |      |   |   |   |
| 24545 | 210.613174438477 | 0.06 |   | 1 |   |
| ;     |                  |      |   |   |   |
| 24546 | 210.938369750977 | 0.08 |   | 1 |   |
| ;     |                  |      |   |   |   |
| 24547 | 210.947631835938 | 0.12 |   | 1 |   |
| ;     |                  |      |   |   |   |
| 24548 | 212.050079345703 | 0.11 |   | 1 |   |
| ;     |                  |      |   |   |   |
| 24549 | 196.862823486328 | 0.02 |   | 1 |   |
| ;     |                  |      |   |   |   |
| 24550 | 218.068649291992 | 0.00 |   | 1 |   |
| ;     |                  |      |   |   |   |
| 24551 | 218.135528564453 | 0.02 |   | 1 |   |
| ;     |                  |      |   |   |   |
| 24552 | 218.395355224609 | 0.03 |   | 1 |   |
| ;     |                  |      |   |   |   |
| 24553 | 218.547821044922 | 0.03 |   | 1 |   |
| ;     |                  |      |   |   |   |
| 24554 | 218.72428894043  | 0.02 | 1 |   | ; |
| 24555 | 218.621170043945 | 0.00 |   | 1 |   |
| ;     |                  |      |   |   |   |
| 24556 | 218.62077331543  | 0.01 | 1 |   | ; |
| 24557 | 218.630493164062 | 0.00 |   | 1 |   |

|       |                  |      |   |   |
|-------|------------------|------|---|---|
| ;     |                  |      |   |   |
| 24558 | 196.868316650391 | 0.01 | 1 |   |
| ;     |                  |      |   |   |
| 24559 | 196.121765136719 | 0.02 | 1 |   |
| ;     |                  |      |   |   |
| 24560 | 196.262130737305 | 0.00 | 1 |   |
| ;     |                  |      |   |   |
| 24561 | 202.360443115234 | 0.06 | 1 |   |
| ;     |                  |      |   |   |
| 24562 | 202.656646728516 | 0.01 | 1 |   |
| ;     |                  |      |   |   |
| 24563 | 201.174774169922 | 0.02 | 1 |   |
| ;     |                  |      |   |   |
| 24564 | 200.700820922852 | 0.03 | 1 |   |
| ;     |                  |      |   |   |
| 24565 | 201.440872192383 | 0.04 | 1 |   |
| ;     |                  |      |   |   |
| 24566 | 201.088928222656 | 0.04 | 1 |   |
| ;     |                  |      |   |   |
| 24567 | 201.724380493164 | 0.05 | 1 |   |
| ;     |                  |      |   |   |
| 24568 | 201.464553833008 | 0.03 | 1 |   |
| ;     |                  |      |   |   |
| 24569 | 202.855972290039 | 0.04 | 1 |   |
| ;     |                  |      |   |   |
| 24570 | 202.305892944336 | 0.05 | 1 |   |
| ;     |                  |      |   |   |
| 24571 | 202.306518554687 | 0.01 | 1 |   |
| ;     |                  |      |   |   |
| 24572 | 201.544616699219 | 0.04 | 1 |   |
| ;     |                  |      |   |   |
| 24573 | 201.925903320313 | 0.02 | 1 |   |
| ;     |                  |      |   |   |
| 24574 | 201.163650512695 | 0.03 | 1 |   |
| ;     |                  |      |   |   |
| 24575 | 219.344177246094 | 0.01 | 1 |   |
| ;     |                  |      |   |   |
| 24576 | 219.32258605957  | 0.00 | 1 |   |
| 24577 | 222.255157470703 | 0.02 | 1 | ; |
| ;     |                  |      |   |   |
| 24578 | 221.682647705078 | 0.02 | 1 |   |
| ;     |                  |      |   |   |
| 24579 | 220.943695068359 | 0.02 | 1 |   |
| ;     |                  |      |   |   |
| 24580 | 221.134674072266 | 0.01 | 1 |   |
| ;     |                  |      |   |   |
| 24581 | 195.899002075195 | 0.00 | 1 |   |
| ;     |                  |      |   |   |
| 24582 | 195.985198974609 | 0.01 | 1 |   |
| ;     |                  |      |   |   |

|       |                  |      |   |   |
|-------|------------------|------|---|---|
| 24583 | 195.594467163086 | 0.07 | 1 |   |
| ;     |                  |      |   |   |
| 24584 | 195.340744018555 | 0.07 | 1 |   |
| ;     |                  |      |   |   |
| 24585 | 195.839050292969 | 0.01 | 1 |   |
| ;     |                  |      |   |   |
| 24586 | 195.079177856445 | 0.08 | 1 |   |
| ;     |                  |      |   |   |
| 24587 | 199.594879150391 | 0.10 | 1 |   |
| ;     |                  |      |   |   |
| 24588 | 199.5654296875   | 0.02 | 1 | ; |
| 24589 | 200              | 0.06 | 1 | ; |
| 24590 | 197.902191162109 | 0.09 | 1 |   |
| ;     |                  |      |   |   |
| 24591 | 197.207077026367 | 0.02 | 1 |   |
| ;     |                  |      |   |   |
| 24592 | 205              | 0.01 | 1 | ; |
| 24593 | 205              | 0.01 | 1 | ; |
| 24594 | 205              | 0.00 | 1 | ; |
| 24595 | 219.065780639648 | 0.04 | 1 |   |
| ;     |                  |      |   |   |
| 24596 | 218.852737426758 | 0.01 | 1 |   |
| ;     |                  |      |   |   |
| 24597 | 210.709976196289 | 0.11 | 1 |   |
| ;     |                  |      |   |   |
| 24598 | 205.592468261719 | 0.04 | 1 |   |
| ;     |                  |      |   |   |
| 24599 | 205.599319458008 | 0.00 | 1 |   |
| ;     |                  |      |   |   |
| 24600 | 205              | 0.04 | 1 | ; |
| 24601 | 205              | 0.02 | 1 | ; |
| 24602 | 205.629516601563 | 0.01 | 1 |   |
| ;     |                  |      |   |   |
| 24603 | 205.729598999023 | 0.00 | 1 |   |
| ;     |                  |      |   |   |
| 24604 | 205              | 0.00 | 1 | ; |
| 24605 | 205              | 0.03 | 1 | ; |
| 24606 | 216.5908203125   | 0.08 | 1 | ; |
| 24607 | 216.605255126953 | 0.03 | 1 |   |
| ;     |                  |      |   |   |
| 24608 | 221.945266723633 | 0.03 | 1 |   |
| ;     |                  |      |   |   |
| 24609 | 221.942947387695 | 0.00 | 1 |   |
| ;     |                  |      |   |   |
| 24610 | 220.589859008789 | 0.01 | 1 |   |
| ;     |                  |      |   |   |
| 24611 | 220.647994995117 | 0.01 | 1 |   |
| ;     |                  |      |   |   |
| 24612 | 218.763626098633 | 0.05 | 1 |   |
| ;     |                  |      |   |   |

|       |                  |      |   |   |
|-------|------------------|------|---|---|
| 24613 | 218.927001953125 | 0.02 | 1 |   |
| ;     |                  |      |   |   |
| 24614 | 219.808685302734 | 0.01 | 1 |   |
| ;     |                  |      |   |   |
| 24615 | 219.84375        | 0.02 | 1 | ; |
| 24616 | 221.623870849609 | 0.04 | 1 |   |
| ;     |                  |      |   |   |
| 24617 | 221.974273681641 | 0.02 | 1 |   |
| ;     |                  |      |   |   |
| 24618 | 222.166259765625 | 0.01 | 1 |   |
| ;     |                  |      |   |   |
| 24619 | 218.524810791016 | 0.05 | 1 |   |
| ;     |                  |      |   |   |
| 24620 | 218.490966796875 | 0.01 | 1 |   |
| ;     |                  |      |   |   |
| 24621 | 218.410095214844 | 0.04 | 1 |   |
| ;     |                  |      |   |   |
| 24622 | 218.178436279297 | 0.01 | 1 |   |
| ;     |                  |      |   |   |
| 24623 | 220.416427612305 | 0.03 | 1 |   |
| ;     |                  |      |   |   |
| 24624 | 221.040008544922 | 0.02 | 1 |   |
| ;     |                  |      |   |   |
| 24625 | 221.205520629883 | 0.01 | 1 |   |
| ;     |                  |      |   |   |
| 24626 | 221.535263061523 | 0.03 | 1 |   |
| ;     |                  |      |   |   |
| 24627 | 221.454681396484 | 0.01 | 1 |   |
| ;     |                  |      |   |   |
| 24628 | 220.580352783203 | 0.04 | 1 |   |
| ;     |                  |      |   |   |
| 24629 | 220.507797241211 | 0.01 | 1 |   |
| ;     |                  |      |   |   |
| 24630 | 220.088348388672 | 0.04 | 1 |   |
| ;     |                  |      |   |   |
| 24631 | 218.531326293945 | 0.01 | 1 |   |
| ;     |                  |      |   |   |
| 24632 | 218.990127563477 | 0.09 | 1 |   |
| ;     |                  |      |   |   |
| 24633 | 219.325637817383 | 0.04 | 1 |   |
| ;     |                  |      |   |   |
| 24634 | 205              | 0.03 | 1 | ; |
| 24635 | 205              | 0.03 | 1 | ; |
| 24636 | 205              | 0.01 | 1 | ; |
| 24637 | 205              | 0.01 | 1 | ; |
| 24638 | 208.213027954102 | 0.20 | 1 |   |
| ;     |                  |      |   |   |
| 24639 | 208.130294799805 | 0.01 | 1 |   |
| ;     |                  |      |   |   |
| 24640 | 208.109451293945 | 0.00 | 1 |   |

|       |                  |      |   |   |   |
|-------|------------------|------|---|---|---|
| ;     |                  |      |   |   |   |
| 24641 | 208.223510742188 | 0.07 |   | 1 |   |
| ;     |                  |      |   |   |   |
| 24642 | 209.489532470703 | 0.18 |   | 1 |   |
| ;     |                  |      |   |   |   |
| 24643 | 203.906112670898 | 0.04 |   | 1 |   |
| ;     |                  |      |   |   |   |
| 24644 | 201.360748291016 | 0.02 |   | 1 |   |
| ;     |                  |      |   |   |   |
| 24645 | 201.053329467773 | 0.03 |   | 1 |   |
| ;     |                  |      |   |   |   |
| 24646 | 209.597885131836 | 0.08 |   | 1 |   |
| ;     |                  |      |   |   |   |
| 24647 | 208.516586303711 | 0.13 |   | 1 |   |
| ;     |                  |      |   |   |   |
| 24648 | 208.845275878906 | 0.05 |   | 1 |   |
| ;     |                  |      |   |   |   |
| 24649 | 205              | 0.02 | 1 |   | ; |
| 24650 | 222.806137084961 | 0.02 |   | 1 |   |
| ;     |                  |      |   |   |   |
| 24651 | 219.688491821289 | 0.03 |   | 1 |   |
| ;     |                  |      |   |   |   |
| 24652 | 222.359130859375 | 0.01 |   | 1 |   |
| ;     |                  |      |   |   |   |
| 24653 | 219.363037109375 | 0.00 |   | 1 |   |
| ;     |                  |      |   |   |   |
| 24654 | 222.320724487305 | 0.01 |   | 1 |   |
| ;     |                  |      |   |   |   |
| 24655 | 207.990921020508 | 0.01 |   | 1 |   |
| ;     |                  |      |   |   |   |
| 24656 | 205              | 0.01 | 1 |   | ; |
| 24657 | 195.724548339844 | 0.01 |   | 1 |   |
| ;     |                  |      |   |   |   |
| 24658 | 195.510238647461 | 0.01 |   | 1 |   |
| ;     |                  |      |   |   |   |
| 24659 | 195.422317504883 | 0.03 |   | 1 |   |
| ;     |                  |      |   |   |   |
| 24660 | 200.851379394531 | 0.01 |   | 1 |   |
| ;     |                  |      |   |   |   |
| 24661 | 205              | 0.05 | 1 |   | ; |
| 24662 | 198.48616027832  | 0.02 | 1 |   | ; |
| 24663 | 217.711776733398 | 0.02 |   | 1 |   |
| ;     |                  |      |   |   |   |
| 24664 | 217.934860229492 | 0.02 |   | 1 |   |
| ;     |                  |      |   |   |   |
| 24665 | 218.439102172852 | 0.02 |   | 1 |   |
| ;     |                  |      |   |   |   |
| 24666 | 218.456726074219 | 0.03 |   | 1 |   |
| ;     |                  |      |   |   |   |
| 24667 | 217.976104736328 | 0.01 |   | 1 |   |

|       |                  |      |   |   |
|-------|------------------|------|---|---|
| ;     |                  |      |   |   |
| 24668 | 217.211868286133 | 0.04 | 1 |   |
| ;     |                  |      |   |   |
| 24669 | 217.231018066406 | 0.00 | 1 |   |
| ;     |                  |      |   |   |
| 24670 | 218.037628173828 | 0.01 | 1 |   |
| ;     |                  |      |   |   |
| 24671 | 198.268585205078 | 0.01 | 1 |   |
| ;     |                  |      |   |   |
| 24672 | 198.304763793945 | 0.01 | 1 |   |
| ;     |                  |      |   |   |
| 24673 | 198.641586303711 | 0.01 | 1 |   |
| ;     |                  |      |   |   |
| 24674 | 198.224212646484 | 0.02 | 1 |   |
| ;     |                  |      |   |   |
| 24675 | 198.756530761719 | 0.02 | 1 |   |
| ;     |                  |      |   |   |
| 24676 | 198.197280883789 | 0.02 | 1 |   |
| ;     |                  |      |   |   |
| 24677 | 198.747406005859 | 0.02 | 1 |   |
| ;     |                  |      |   |   |
| 24678 | 198.734405517578 | 0.01 | 1 |   |
| ;     |                  |      |   |   |
| 24679 | 198.036026000977 | 0.01 | 1 |   |
| ;     |                  |      |   |   |
| 24680 | 195.473434448242 | 0.00 | 1 |   |
| ;     |                  |      |   |   |
| 24681 | 195.464660644531 | 0.00 | 1 |   |
| ;     |                  |      |   |   |
| 24682 | 194.958374023438 | 0.00 | 1 |   |
| ;     |                  |      |   |   |
| 24683 | 194.953628540039 | 0.00 | 1 |   |
| ;     |                  |      |   |   |
| 24684 | 194.204223632813 | 0.00 | 1 |   |
| ;     |                  |      |   |   |
| 24685 | 194.212860107422 | 0.00 | 1 |   |
| ;     |                  |      |   |   |
| 24686 | 194.383850097656 | 0.00 | 1 |   |
| ;     |                  |      |   |   |
| 24687 | 194.387374877793 | 0.01 | 1 |   |
| 24688 | 193.199600219727 | 0.00 | 1 | ; |
| ;     |                  |      |   |   |
| 24689 | 193.204696655273 | 0.02 | 1 |   |
| ;     |                  |      |   |   |
| 24690 | 218.86442565918  | 0.03 | 1 | ; |
| 24691 | 194.962295532227 | 0.00 | 1 |   |
| ;     |                  |      |   |   |
| 24692 | 194.674621582031 | 0.00 | 1 |   |
| ;     |                  |      |   |   |
| 24693 | 195.222564697266 | 0.00 | 1 |   |



|       |                  |      |   |  |   |
|-------|------------------|------|---|--|---|
| ;     |                  |      |   |  |   |
| 24694 | 195.478607177734 | 0.00 | 1 |  |   |
| ;     |                  |      |   |  |   |
| 24695 | 195.528244018555 | 0.00 | 1 |  |   |
| ;     |                  |      |   |  |   |
| 24696 | 195              | 0.01 | 1 |  | ; |
| 24697 | 193.293334960937 | 0.02 | 1 |  |   |
| ;     |                  |      |   |  |   |
| 24698 | 192.788955688477 | 0.01 | 1 |  |   |
| ;     |                  |      |   |  |   |
| 24699 | 193.81884765625  | 0.14 | 1 |  | ; |
| 24700 | 194.625045776367 | 0.03 | 1 |  |   |
| ;     |                  |      |   |  |   |
| 24701 | 194.71549987793  | 0.04 | 1 |  | ; |
| 24702 | 195              | 0.01 | 1 |  | ; |
| 24703 | 195.040817260742 | 0.05 | 1 |  |   |
| ;     |                  |      |   |  |   |
| 24704 | 193.205795288086 | 0.00 | 1 |  |   |
| ;     |                  |      |   |  |   |
| 24705 | 196.247573852539 | 0.02 | 1 |  |   |
| ;     |                  |      |   |  |   |
| 24706 | 196.192276000977 | 0.00 | 1 |  |   |
| ;     |                  |      |   |  |   |
| 24707 | 197.366821289063 | 0.01 | 1 |  |   |
| ;     |                  |      |   |  |   |
| 24708 | 194.322723388672 | 0.00 | 1 |  |   |
| ;     |                  |      |   |  |   |
| 24709 | 194.305679321289 | 0.00 | 1 |  |   |
| ;     |                  |      |   |  |   |
| 24710 | 196.664886474609 | 0.01 | 1 |  |   |
| ;     |                  |      |   |  |   |
| 24711 | 195              | 0.02 | 1 |  | ; |
| 24712 | 195              | 0.00 | 1 |  | ; |
| 24713 | 195              | 0.00 | 1 |  | ; |
| 24714 | 193.501281738281 | 0.03 | 1 |  |   |
| ;     |                  |      |   |  |   |
| 24715 | 204.313385009766 | 0.09 | 1 |  |   |
| ;     |                  |      |   |  |   |
| 24716 | 204.08154296875  | 0.03 | 1 |  | ; |
| 24717 | 208.656158447266 | 0.00 | 1 |  |   |
| ;     |                  |      |   |  |   |
| 24718 | 208.65461730957  | 0.04 | 1 |  | ; |
| 24719 | 208.596221923828 | 0.01 | 1 |  |   |
| ;     |                  |      |   |  |   |
| 24720 | 197.383041381836 | 0.05 | 1 |  |   |
| ;     |                  |      |   |  |   |
| 24721 | 197.051681518555 | 0.05 | 1 |  |   |
| ;     |                  |      |   |  |   |
| 24722 | 196.995376586914 | 0.02 | 1 |  |   |
| ;     |                  |      |   |  |   |

|       |                      |      |  |   |  |
|-------|----------------------|------|--|---|--|
| 24723 | 197.61506652832 0.06 | 1    |  |   |  |
| 24724 | 197.060195922852     | 0.04 |  | 1 |  |
| ;     |                      |      |  |   |  |
| 24725 | 197.549819946289     | 0.00 |  | 1 |  |
| ;     |                      |      |  |   |  |
| 24726 | 196.651779174805     | 0.03 |  | 1 |  |
| ;     |                      |      |  |   |  |
| 24727 | 196.531280517578     | 0.02 |  | 1 |  |
| ;     |                      |      |  |   |  |
| 24728 | 197.036010742188     | 0.00 |  | 1 |  |
| ;     |                      |      |  |   |  |
| 24729 | 197.054656982422     | 0.00 |  | 1 |  |
| ;     |                      |      |  |   |  |
| 24730 | 197.578384399414     | 0.01 |  | 1 |  |
| ;     |                      |      |  |   |  |
| 24731 | 197.720245361328     | 0.05 |  | 1 |  |
| ;     |                      |      |  |   |  |
| 24732 | 197.716720581055     | 0.02 |  | 1 |  |
| ;     |                      |      |  |   |  |
| 24733 | 197.34016418457 0.02 | 1    |  |   |  |
| 24734 | 197.0244140625 0.03  | 1    |  |   |  |
| 24735 | 196.36589050293 0.00 | 1    |  |   |  |
| 24736 | 196.38037109375 0.00 | 1    |  |   |  |
| 24737 | 198.385284423828     | 0.01 |  | 1 |  |
| ;     |                      |      |  |   |  |
| 24738 | 198.780258178711     | 0.05 |  | 1 |  |
| ;     |                      |      |  |   |  |
| 24739 | 198.317367553711     | 0.02 |  | 1 |  |
| ;     |                      |      |  |   |  |
| 24740 | 198.024536132812     | 0.00 |  | 1 |  |
| ;     |                      |      |  |   |  |
| 24741 | 198.384552001953     | 0.01 |  | 1 |  |
| ;     |                      |      |  |   |  |
| 24742 | 198.856460571289     | 0.04 |  | 1 |  |
| ;     |                      |      |  |   |  |
| 24743 | 198.311904907227     | 0.00 |  | 1 |  |
| ;     |                      |      |  |   |  |
| 24744 | 198.378051757813     | 0.01 |  | 1 |  |
| ;     |                      |      |  |   |  |
| 24745 | 199.106521606445     | 0.00 |  | 1 |  |
| ;     |                      |      |  |   |  |
| 24746 | 198.918182373047     | 0.00 |  | 1 |  |
| ;     |                      |      |  |   |  |
| 24747 | 198.016250610352     | 0.01 |  | 1 |  |
| ;     |                      |      |  |   |  |
| 24748 | 198.053833007813     | 0.08 |  | 1 |  |
| ;     |                      |      |  |   |  |
| 24749 | 197.974060058594     | 0.01 |  | 1 |  |
| ;     |                      |      |  |   |  |
| 24750 | 198.215957641602     | 0.02 |  | 1 |  |

|       |                  |      |   |   |   |
|-------|------------------|------|---|---|---|
| ;     |                  |      |   |   |   |
| 24751 | 197.615753173828 | 0.02 |   | 1 |   |
| ;     |                  |      |   |   |   |
| 24752 | 197.925765991211 | 0.02 |   | 1 |   |
| ;     |                  |      |   |   |   |
| 24753 | 197.281982421875 | 0.01 |   | 1 |   |
| ;     |                  |      |   |   |   |
| 24754 | 197.630325317383 | 0.04 |   | 1 |   |
| ;     |                  |      |   |   |   |
| 24755 | 197.128875732422 | 0.01 |   | 1 |   |
| ;     |                  |      |   |   |   |
| 24756 | 197.620223999023 | 0.01 |   | 1 |   |
| ;     |                  |      |   |   |   |
| 24757 | 196.707000732422 | 0.02 |   | 1 |   |
| ;     |                  |      |   |   |   |
| 24758 | 198.372924804688 | 0.01 |   | 1 |   |
| ;     |                  |      |   |   |   |
| 24759 | 198.540267944336 | 0.02 |   | 1 |   |
| ;     |                  |      |   |   |   |
| 24760 | 198.504089355469 | 0.02 |   | 1 |   |
| ;     |                  |      |   |   |   |
| 24761 | 198.2822265625   | 0.02 | 1 |   | ; |
| 24762 | 198.123062133789 | 0.02 |   | 1 |   |
| ;     |                  |      |   |   |   |
| 24763 | 197.960830688477 | 0.01 |   | 1 |   |
| ;     |                  |      |   |   |   |
| 24764 | 198.040344238281 | 0.02 |   | 1 |   |
| ;     |                  |      |   |   |   |
| 24765 | 197.493301391602 | 0.02 |   | 1 |   |
| ;     |                  |      |   |   |   |
| 24766 | 196.721145629883 | 0.03 |   | 1 |   |
| ;     |                  |      |   |   |   |
| 24767 | 196.517929077148 | 0.01 |   | 1 |   |
| ;     |                  |      |   |   |   |
| 24768 | 198.167282104492 | 0.00 |   | 1 |   |
| ;     |                  |      |   |   |   |
| 24769 | 195.030548095703 | 0.00 |   | 1 |   |
| ;     |                  |      |   |   |   |
| 24770 | 195.133972167969 | 0.02 |   | 1 |   |
| ;     |                  |      |   |   |   |
| 24771 | 195.41471862793  | 0.01 | 1 |   | ; |
| 24772 | 195.277236938477 | 0.01 |   | 1 |   |
| ;     |                  |      |   |   |   |
| 24773 | 195.006500244141 | 0.02 |   | 1 |   |
| ;     |                  |      |   |   |   |
| 24774 | 198.133331298828 | 0.01 |   | 1 |   |
| ;     |                  |      |   |   |   |
| 24775 | 197.93586730957  | 0.03 | 1 |   | ; |
| 24776 | 197.742431640625 | 0.02 |   | 1 |   |
| ;     |                  |      |   |   |   |

|       |                  |      |   |   |
|-------|------------------|------|---|---|
| 24777 | 197.789031982422 | 0.02 | 1 |   |
| ;     |                  |      |   |   |
| 24778 | 197.638168334961 | 0.04 | 1 |   |
| ;     |                  |      |   |   |
| 24779 | 197.743667602539 | 0.01 | 1 |   |
| ;     |                  |      |   |   |
| 24780 | 197.131851196289 | 0.04 | 1 |   |
| ;     |                  |      |   |   |
| 24781 | 197.260665893555 | 0.01 | 1 |   |
| ;     |                  |      |   |   |
| 24782 | 197.257125854492 | 0.02 | 1 |   |
| ;     |                  |      |   |   |
| 24783 | 197.262741088867 | 0.01 | 1 |   |
| ;     |                  |      |   |   |
| 24784 | 197.392425537109 | 0.03 | 1 |   |
| ;     |                  |      |   |   |
| 24785 | 198.18815612793  | 0.00 | 1 | ; |
| 24786 | 198.194412231445 | 0.00 | 1 |   |
| ;     |                  |      |   |   |
| 24787 | 198.196853637695 | 0.01 | 1 |   |
| ;     |                  |      |   |   |
| 24788 | 198.119354248047 | 0.02 | 1 |   |
| ;     |                  |      |   |   |
| 24789 | 197.540710449219 | 0.01 | 1 |   |
| ;     |                  |      |   |   |
| 24790 | 197.246566772461 | 0.01 | 1 |   |
| ;     |                  |      |   |   |
| 24791 | 195.461578369141 | 0.02 | 1 |   |
| ;     |                  |      |   |   |
| 24792 | 195.127197265625 | 0.01 | 1 |   |
| ;     |                  |      |   |   |
| 24793 | 239.808670043945 | 0.01 | 1 |   |
| ;     |                  |      |   |   |
| 24794 | 239.794830322266 | 0.02 | 1 |   |
| ;     |                  |      |   |   |
| 24795 | 240              | 0.00 | 1 | ; |
| 24796 | 240              | 0.02 | 1 | ; |
| 24797 | 240              | 0.01 | 1 | ; |
| 24798 | 240              | 0.04 | 1 | ; |
| 24799 | 240              | 0.01 | 1 | ; |
| 24800 | 240              | 0.01 | 1 | ; |
| 24801 | 240.058639526367 | 0.00 | 1 |   |
| ;     |                  |      |   |   |
| 24802 | 240.082046508789 | 0.00 | 1 |   |
| ;     |                  |      |   |   |
| 24803 | 240.066879272461 | 0.01 | 1 |   |
| ;     |                  |      |   |   |
| 24804 | 240              | 0.04 | 1 | ; |
| 24805 | 240              | 0.05 | 1 | ; |
| 24806 | 240              | 0.06 | 1 | ; |

|       |                  |      |   |   |  |  |
|-------|------------------|------|---|---|--|--|
| 24807 | 240              | 0.13 | 1 |   |  |  |
| 24808 | 239.332214355469 | 0.00 |   | 1 |  |  |
| ;     |                  |      |   |   |  |  |
| 24809 | 239.391632080078 | 0.00 |   | 1 |  |  |
| ;     |                  |      |   |   |  |  |
| 24810 | 239.318389892578 | 0.00 |   | 1 |  |  |
| ;     |                  |      |   |   |  |  |
| 24811 | 237.116348266602 | 0.00 |   | 1 |  |  |
| ;     |                  |      |   |   |  |  |
| 24812 | 240              | 0.02 | 1 |   |  |  |
| 24813 | 205.260131835938 | 0.08 |   | 1 |  |  |
| ;     |                  |      |   |   |  |  |
| 24814 | 195.105911254883 | 0.00 |   | 1 |  |  |
| ;     |                  |      |   |   |  |  |
| 24815 | 195.428009033203 | 0.00 |   | 1 |  |  |
| ;     |                  |      |   |   |  |  |
| 24816 | 194.085235595703 | 0.00 |   | 1 |  |  |
| ;     |                  |      |   |   |  |  |
| 24817 | 204.834396362305 | 0.04 |   | 1 |  |  |
| ;     |                  |      |   |   |  |  |
| 24818 | 196.410522460938 | 0.01 |   | 1 |  |  |
| ;     |                  |      |   |   |  |  |
| 24819 | 196.437271118164 | 0.00 |   | 1 |  |  |
| ;     |                  |      |   |   |  |  |
| 24820 | 196.368179321289 | 0.01 |   | 1 |  |  |
| ;     |                  |      |   |   |  |  |
| 24821 | 196.321228027344 | 0.01 |   | 1 |  |  |
| ;     |                  |      |   |   |  |  |
| 24822 | 196.424407958984 | 0.00 |   | 1 |  |  |
| ;     |                  |      |   |   |  |  |
| 24823 | 198.501174926758 | 0.02 |   | 1 |  |  |
| ;     |                  |      |   |   |  |  |
| 24824 | 198.643341064453 | 0.02 |   | 1 |  |  |
| ;     |                  |      |   |   |  |  |
| 24825 | 198.50309753418  | 0.01 | 1 |   |  |  |
| 24826 | 195.861541748047 | 0.03 |   | 1 |  |  |
| ;     |                  |      |   |   |  |  |
| 24827 | 197.874038696289 | 0.05 |   | 1 |  |  |
| ;     |                  |      |   |   |  |  |
| 24828 | 198.139404296875 | 0.01 |   | 1 |  |  |
| ;     |                  |      |   |   |  |  |
| 24829 | 198.999786376953 | 0.02 |   | 1 |  |  |
| ;     |                  |      |   |   |  |  |
| 24830 | 197.627487182617 | 0.03 |   | 1 |  |  |
| ;     |                  |      |   |   |  |  |
| 24831 | 196.901245117188 | 0.02 |   | 1 |  |  |
| ;     |                  |      |   |   |  |  |
| 24832 | 198.030090332031 | 0.01 |   | 1 |  |  |
| ;     |                  |      |   |   |  |  |
| 24833 | 202.838973999023 | 0.01 |   | 1 |  |  |

|   |       |                  |      |   |   |
|---|-------|------------------|------|---|---|
| ; | 24834 | 202.851089477539 | 0.00 | 1 |   |
| ; | 24835 | 202.72624206543  | 0.02 | 1 | ; |
|   | 24836 | 201.974044799805 | 0.04 | 1 |   |
| ; | 24837 | 203.517715454102 | 0.08 | 1 |   |
| ; | 24838 | 203.344863891602 | 0.01 | 1 |   |
| ; | 24839 | 203.815368652344 | 0.02 | 1 |   |
| ; | 24840 | 204.045196533203 | 0.06 | 1 |   |
| ; | 24841 | 203.184875488281 | 0.02 | 1 |   |
| ; | 24842 | 204.544342041016 | 0.02 | 1 |   |
| ; | 24843 | 204.428009033203 | 0.01 | 1 |   |
| ; | 24844 | 204.360473632813 | 0.03 | 1 |   |
| ; | 24845 | 204.842895507813 | 0.01 | 1 |   |
| ; | 24846 | 204.954147338867 | 0.03 | 1 |   |
| ; | 24847 | 203.532745361328 | 0.02 | 1 |   |
| ; | 24849 | 214.0634765625   | 0.00 | 1 | ; |
|   | 24850 | 214.194839477539 | 0.00 | 1 |   |
| ; | 24851 | 244.528930664063 | 0.00 | 1 |   |
| ; | 24852 | 214.205352783203 | 0.00 | 1 |   |
| ; | 24853 | 203.158813476563 | 0.17 | 1 |   |
| ; | 24854 | 204.642166137695 | 0.03 | 1 |   |
| ; | 24855 | 205.584823608398 | 0.03 | 1 |   |
| ; | 24856 | 204.749267578125 | 0.17 | 1 |   |
| ; | 24857 | 218.730117797852 | 0.06 | 1 |   |
| ; | 24858 | 218.598083496094 | 0.06 | 1 |   |
| ; | 24859 | 218.054321289063 | 0.02 | 1 |   |
| ; | 24860 | 217.922592163086 | 0.03 | 1 |   |

|       |                  |      |   |   |
|-------|------------------|------|---|---|
| ;     |                  |      |   |   |
| 24861 | 202.682601928711 | 0.00 | 1 |   |
| ;     |                  |      |   |   |
| 24862 | 202.670654296875 | 0.02 | 1 |   |
| ;     |                  |      |   |   |
| 24863 | 204.004470825195 | 0.00 | 1 |   |
| ;     |                  |      |   |   |
| 24864 | 202.437393188477 | 0.06 | 1 |   |
| ;     |                  |      |   |   |
| 24865 | 202.426803588867 | 0.00 | 1 |   |
| ;     |                  |      |   |   |
| 24866 | 202.402709960938 | 0.00 | 1 |   |
| ;     |                  |      |   |   |
| 24867 | 198.244186401367 | 0.01 | 1 |   |
| ;     |                  |      |   |   |
| 24868 | 196.602630615234 | 0.00 | 1 |   |
| ;     |                  |      |   |   |
| 24869 | 196.606430053711 | 0.02 | 1 |   |
| ;     |                  |      |   |   |
| 24870 | 198.176651000977 | 0.02 | 1 |   |
| ;     |                  |      |   |   |
| 24871 | 197.781814575195 | 0.01 | 1 |   |
| ;     |                  |      |   |   |
| 24872 | 198.149322509766 | 0.01 | 1 |   |
| ;     |                  |      |   |   |
| 24873 | 196.946960449219 | 0.02 | 1 |   |
| ;     |                  |      |   |   |
| 24874 | 198.064605712891 | 0.02 | 1 |   |
| ;     |                  |      |   |   |
| 24875 | 199.399993896484 | 0.01 | 1 |   |
| ;     |                  |      |   |   |
| 24876 | 199.434066772461 | 0.00 | 1 |   |
| ;     |                  |      |   |   |
| 24877 | 199.270324707031 | 0.05 | 1 |   |
| ;     |                  |      |   |   |
| 24878 | 198.602645874023 | 0.01 | 1 |   |
| ;     |                  |      |   |   |
| 24879 | 200              | 0.03 | 1 |   |
| 24880 | 198.936264038086 | 0.00 | 1 | ; |
| ;     |                  |      |   |   |
| 24881 | 198.062530517578 | 0.00 | 1 |   |
| ;     |                  |      |   |   |
| 24882 | 197.995574951172 | 0.01 | 1 |   |
| ;     |                  |      |   |   |
| 24883 | 199.776947021484 | 0.01 | 1 |   |
| ;     |                  |      |   |   |
| 24884 | 199.733810424805 | 0.05 | 1 |   |
| ;     |                  |      |   |   |
| 24885 | 198.978225708008 | 0.03 | 1 |   |
| ;     |                  |      |   |   |

|       |                  |      |   |   |
|-------|------------------|------|---|---|
| 24886 | 198.891159057617 | 0.02 | 1 |   |
| ;     |                  |      |   |   |
| 24887 | 199.314331054688 | 0.02 | 1 |   |
| ;     |                  |      |   |   |
| 24888 | 199.391510009766 | 0.03 | 1 |   |
| ;     |                  |      |   |   |
| 24889 | 199.347076416016 | 0.02 | 1 |   |
| ;     |                  |      |   |   |
| 24890 | 198.346466064453 | 0.01 | 1 |   |
| ;     |                  |      |   |   |
| 24891 | 196.790069580078 | 0.03 | 1 |   |
| ;     |                  |      |   |   |
| 24892 | 197.056579589844 | 0.03 | 1 |   |
| ;     |                  |      |   |   |
| 24893 | 202.25244140625  | 0.11 | 1 | ; |
| 24894 | 209.75           | 0.09 | 1 | ; |
| 24895 | 209.75           | 0.00 | 1 | ; |
| 24896 | 209.75           | 0.00 | 1 | ; |
| 24897 | 209.75           | 0.00 | 1 | ; |
| 24898 | 212.025451660156 | 0.01 | 1 |   |
| ;     |                  |      |   |   |
| 24899 | 212.462539672852 | 0.01 | 1 |   |
| ;     |                  |      |   |   |
| 24900 | 212.548614501953 | 0.01 | 1 |   |
| ;     |                  |      |   |   |
| 24901 | 211.107559204102 | 0.09 | 1 |   |
| ;     |                  |      |   |   |
| 24902 | 216.297058105469 | 0.18 | 1 |   |
| ;     |                  |      |   |   |
| 24903 | 216.814666748047 | 0.12 | 1 |   |
| ;     |                  |      |   |   |
| 24904 | 217.337387084961 | 0.05 | 1 |   |
| ;     |                  |      |   |   |
| 24905 | 218.313339233398 | 0.03 | 1 |   |
| ;     |                  |      |   |   |
| 24906 | 218.167831420898 | 0.01 | 1 |   |
| ;     |                  |      |   |   |
| 24907 | 203.375579833984 | 0.00 | 1 |   |
| ;     |                  |      |   |   |
| 24908 | 221.251403808594 | 0.19 | 1 |   |
| ;     |                  |      |   |   |
| 24909 | 219.269409179688 | 0.00 | 1 |   |
| ;     |                  |      |   |   |
| 24910 | 208.094360351563 | 0.05 | 1 |   |
| ;     |                  |      |   |   |
| 24911 | 204.887603759766 | 0.00 | 1 |   |
| ;     |                  |      |   |   |
| 24912 | 204.482345581055 | 0.00 | 1 |   |
| ;     |                  |      |   |   |
| 24913 | 204.931488037109 | 0.01 | 1 |   |



|       |                      |      |   |   |   |
|-------|----------------------|------|---|---|---|
| ;     |                      |      |   |   |   |
| 24914 | 204.918212890625     | 0.00 |   | 1 |   |
| ;     |                      |      |   |   |   |
| 24915 | 204.595138549805     | 0.00 |   | 1 |   |
| ;     |                      |      |   |   |   |
| 24916 | 208.192626953125     | 0.09 |   | 1 |   |
| ;     |                      |      |   |   |   |
| 24917 | 208.417755126953     | 0.09 |   | 1 |   |
| ;     |                      |      |   |   |   |
| 24918 | 205.55110168457 0.04 |      | 1 |   | ; |
| 24919 | 205.55534362793 0.00 |      | 1 |   | ; |
| 24920 | 238.005172729492     | 0.00 |   | 1 |   |
| ;     |                      |      |   |   |   |
| 24921 | 239.724945068359     | 0.00 |   | 1 |   |
| ;     |                      |      |   |   |   |
| 24922 | 239.774215698242     | 0.00 |   | 1 |   |
| ;     |                      |      |   |   |   |
| 24923 | 240 0.00             |      | 1 |   | ; |
| 24924 | 240 0.00             |      | 1 |   | ; |
| 24925 | 239.961441040039     | 0.00 |   | 1 |   |
| ;     |                      |      |   |   |   |
| 24926 | 239.925689697266     | 0.00 |   | 1 |   |
| ;     |                      |      |   |   |   |
| 24927 | 239.754318237305     | 0.00 |   | 1 |   |
| ;     |                      |      |   |   |   |
| 24928 | 239.2841796875 0.00  |      | 1 |   | ; |
| 24929 | 240 0.00             |      | 1 |   | ; |
| 24930 | 238.889022827148     | 0.00 |   | 1 |   |
| ;     |                      |      |   |   |   |
| 24931 | 240 0.00             |      | 1 |   | ; |
| 24932 | 238.53678894043 0.00 |      | 1 |   | ; |
| 24933 | 238.124542236328     | 0.00 |   | 1 |   |
| ;     |                      |      |   |   |   |
| 24934 | 218.664489746094     | 0.00 |   | 1 |   |
| ;     |                      |      |   |   |   |
| 24935 | 218.358932495117     | 0.10 |   | 1 |   |
| ;     |                      |      |   |   |   |
| 24936 | 218.14631652832 0.02 |      | 1 |   | ; |
| 24937 | 217.558395385742     | 0.04 |   | 1 |   |
| ;     |                      |      |   |   |   |
| 24938 | 206.666870117187     | 0.00 |   | 1 |   |
| ;     |                      |      |   |   |   |
| 24939 | 207.304580688477     | 0.07 |   | 1 |   |
| ;     |                      |      |   |   |   |
| 24940 | 204.93376159668 0.18 |      | 1 |   | ; |
| 24941 | 217.08854675293 0.00 |      | 1 |   | ; |
| 24942 | 204.377258300781     | 0.15 |   | 1 |   |
| ;     |                      |      |   |   |   |
| 24943 | 202.583267211914     | 0.20 |   | 1 |   |
| ;     |                      |      |   |   |   |

|       |                  |      |   |   |
|-------|------------------|------|---|---|
| 24944 | 205.832641601563 | 0.00 | 1 |   |
| ;     |                  |      |   |   |
| 24945 | 206.160018920898 | 0.10 | 1 |   |
| ;     |                  |      |   |   |
| 24946 | 205.952163696289 | 0.02 | 1 |   |
| ;     |                  |      |   |   |
| 24947 | 202.138076782227 | 0.00 | 1 |   |
| ;     |                  |      |   |   |
| 24948 | 209.877990722656 | 0.32 | 1 |   |
| ;     |                  |      |   |   |
| 24949 | 200.459777832031 | 0.06 | 1 |   |
| ;     |                  |      |   |   |
| 24950 | 200.909561157227 | 0.00 | 1 |   |
| ;     |                  |      |   |   |
| 24951 | 200.297790527344 | 0.05 | 1 |   |
| ;     |                  |      |   |   |
| 24952 | 194.789901733398 | 0.01 | 1 |   |
| ;     |                  |      |   |   |
| 24953 | 213.835754394531 | 0.04 | 1 |   |
| ;     |                  |      |   |   |
| 24954 | 214.961135864258 | 0.06 | 1 |   |
| ;     |                  |      |   |   |
| 24955 | 200.953674316406 | 0.03 | 1 |   |
| ;     |                  |      |   |   |
| 24956 | 219.017242431641 | 0.00 | 1 |   |
| ;     |                  |      |   |   |
| 24957 | 200              | 0.04 | 1 | ; |
| 24958 | 200              | 0.01 | 1 | ; |
| 24959 | 205              | 0.00 | 1 | ; |
| 24960 | 205.744445800781 | 0.02 | 1 |   |
| ;     |                  |      |   |   |
| 24961 | 199.039886474609 | 0.01 | 1 |   |
| ;     |                  |      |   |   |
| 24962 | 206.338562011719 | 0.07 | 1 |   |
| ;     |                  |      |   |   |
| 24963 | 206.976409912109 | 0.02 | 1 |   |
| ;     |                  |      |   |   |
| 24964 | 214.135131835938 | 0.06 | 1 |   |
| ;     |                  |      |   |   |
| 24965 | 220              | 0.01 | 1 | ; |
| 24966 | 203.323776245117 | 0.01 | 1 |   |
| ;     |                  |      |   |   |
| 24967 | 197.769088745117 | 0.01 | 1 |   |
| ;     |                  |      |   |   |
| 24968 | 201.096694946289 | 0.03 | 1 |   |
| ;     |                  |      |   |   |
| 24969 | 209.187149047852 | 0.04 | 1 |   |
| ;     |                  |      |   |   |
| 24970 | 191.745193481445 | 0.01 | 1 |   |
| ;     |                  |      |   |   |

|       |                  |      |   |   |
|-------|------------------|------|---|---|
| 24971 | 208.799621582031 | 0.31 | 1 |   |
| ;     |                  |      |   |   |
| 24972 | 198.459594726563 | 0.01 | 1 |   |
| ;     |                  |      |   |   |
| 24973 | 212.185668945313 | 0.04 | 1 |   |
| ;     |                  |      |   |   |
| 24974 | 222.200286865234 | 0.00 | 1 |   |
| ;     |                  |      |   |   |
| 24975 | 211.723159790039 | 0.00 | 1 |   |
| ;     |                  |      |   |   |
| 24976 | 197.024108886719 | 0.00 | 1 |   |
| ;     |                  |      |   |   |
| 24977 | 198.494827270508 | 0.02 | 1 |   |
| ;     |                  |      |   |   |
| 24978 | 195.054382324219 | 0.02 | 1 |   |
| ;     |                  |      |   |   |
| 24979 | 197.002548217773 | 0.02 | 1 |   |
| ;     |                  |      |   |   |
| 24980 | 195.985198974609 | 0.05 | 1 |   |
| ;     |                  |      |   |   |
| 24981 | 222.309646606445 | 0.01 | 1 |   |
| ;     |                  |      |   |   |
| 24982 | 222.272384643555 | 0.02 | 1 |   |
| ;     |                  |      |   |   |
| 24983 | 201.07536315918  | 0.02 | 1 |   |
| 24984 | 219.975616455078 | 0.01 | 1 | ; |
| ;     |                  |      |   |   |
| 24985 | 232.065124511719 | 0.06 | 1 |   |
| ;     |                  |      |   |   |
| 24986 | 194.571197509766 | 0.00 | 1 |   |
| ;     |                  |      |   |   |
| 24987 | 200              | 0.05 | 1 |   |
| 24988 | 206.841339111328 | 0.00 | 1 | ; |
| ;     |                  |      |   |   |
| 24989 | 216.624588012695 | 0.02 | 1 |   |
| ;     |                  |      |   |   |
| 24990 | 205              | 0.05 | 1 |   |
| 24991 | 201.598052978516 | 0.11 | 1 | ; |
| ;     |                  |      |   |   |
| 24992 | 210.795486450195 | 0.01 | 1 |   |
| ;     |                  |      |   |   |
| 24993 | 205.89762878418  | 0.05 | 1 |   |
| 24994 | 211.555160522461 | 0.13 | 1 | ; |
| ;     |                  |      |   |   |
| 24995 | 207.594665527344 | 0.00 | 1 |   |
| ;     |                  |      |   |   |
| 24996 | 205.711486816406 | 0.16 | 1 |   |
| ;     |                  |      |   |   |
| 24997 | 203.318298339844 | 0.09 | 1 |   |
| ;     |                  |      |   |   |

|       |                  |      |   |   |  |   |
|-------|------------------|------|---|---|--|---|
| 24998 | 205              | 0.00 | 1 |   |  | ; |
| 24999 | 228.132202148438 | 0.07 |   | 1 |  |   |
| ;     |                  |      |   |   |  |   |
| 25000 | 200              | 0.04 | 1 |   |  | ; |
| 25001 | 206.973541259766 | 0.10 |   | 1 |  |   |
| ;     |                  |      |   |   |  |   |
| 25002 | 213.832885742188 | 0.09 |   | 1 |  |   |
| ;     |                  |      |   |   |  |   |
| 25003 | 216.345672607422 | 0.04 |   | 1 |  |   |
| ;     |                  |      |   |   |  |   |
| 25004 | 207.827606201172 | 0.02 |   | 1 |  |   |
| ;     |                  |      |   |   |  |   |
| 25006 | 213.715438842773 | 0.05 |   | 1 |  |   |
| ;     |                  |      |   |   |  |   |
| 25007 | 213.6435546875   | 0.05 | 1 |   |  | ; |
| 25008 | 203.373138427734 | 0.00 |   | 1 |  |   |
| ;     |                  |      |   |   |  |   |
| 25009 | 202.492462158203 | 0.07 |   | 1 |  |   |
| ;     |                  |      |   |   |  |   |
| 25010 | 203.591186523438 | 0.12 |   | 1 |  |   |
| ;     |                  |      |   |   |  |   |
| 25011 | 204.076583862305 | 0.12 |   | 1 |  |   |
| ;     |                  |      |   |   |  |   |
| 25012 | 200.131790161133 | 0.01 |   | 1 |  |   |
| ;     |                  |      |   |   |  |   |
| 25013 | 203.049743652344 | 0.01 |   | 1 |  |   |
| ;     |                  |      |   |   |  |   |
| 25014 | 221.846328735352 | 0.03 |   | 1 |  |   |
| ;     |                  |      |   |   |  |   |
| 25015 | 220.930587768555 | 0.20 |   | 1 |  |   |
| ;     |                  |      |   |   |  |   |
| 25016 | 220              | 0.03 | 1 |   |  | ; |
| 25017 | 204.364410400391 | 0.02 |   | 1 |  |   |
| ;     |                  |      |   |   |  |   |
| 25018 | 198.782638549805 | 0.02 |   | 1 |  |   |
| ;     |                  |      |   |   |  |   |
| 25019 | 204.078918457031 | 0.07 |   | 1 |  |   |
| ;     |                  |      |   |   |  |   |
| 25020 | 197.904434204102 | 0.02 |   | 1 |  |   |
| ;     |                  |      |   |   |  |   |
| 25021 | 200              | 0.04 | 1 |   |  | ; |
| 25022 | 227.259124755859 | 0.08 |   | 1 |  |   |
| ;     |                  |      |   |   |  |   |
| 25023 | 209.530090332031 | 0.03 |   | 1 |  |   |
| ;     |                  |      |   |   |  |   |
| 25024 | 211.66325378418  | 0.04 | 1 |   |  | ; |
| 25025 | 215.787094116211 | 0.02 |   | 1 |  |   |
| ;     |                  |      |   |   |  |   |
| 25026 | 208.569396972656 | 0.00 |   | 1 |  |   |
| ;     |                  |      |   |   |  |   |

|       |                  |      |   |   |
|-------|------------------|------|---|---|
| 25027 | 203.094039916992 | 0.03 | 1 |   |
| ;     |                  |      |   |   |
| 25028 | 235.860168457031 | 0.00 | 1 |   |
| ;     |                  |      |   |   |
| 25029 | 192.846435546875 | 0.06 | 1 |   |
| ;     |                  |      |   |   |
| 25030 | 224.514556884766 | 0.02 | 1 |   |
| ;     |                  |      |   |   |
| 25031 | 201.79719543457  | 0.05 | 1 | ; |
| 25032 | 225              | 0.05 | 1 | ; |
| 25033 | 227.258575439453 | 0.03 | 1 |   |
| ;     |                  |      |   |   |
| 25034 | 205.78369140625  | 0.89 | 1 | ; |
| 25035 | 203.257308959961 | 0.08 | 1 |   |
| ;     |                  |      |   |   |
| 25036 | 232.880187988281 | 0.01 | 1 |   |
| ;     |                  |      |   |   |
| 25037 | 232.862457275391 | 0.04 | 1 |   |
| ;     |                  |      |   |   |
| 25038 | 221.541198730469 | 0.13 | 1 |   |
| ;     |                  |      |   |   |
| 25039 | 202.682342529297 | 0.02 | 1 |   |
| ;     |                  |      |   |   |
| 25040 | 216.356521606445 | 0.01 | 1 |   |
| ;     |                  |      |   |   |
| 25041 | 204.909301757813 | 0.04 | 1 |   |
| ;     |                  |      |   |   |
| 25042 | 212.675277709961 | 0.00 | 1 |   |
| ;     |                  |      |   |   |
| 25043 | 234.826232910156 | 0.01 | 1 |   |
| ;     |                  |      |   |   |
| 25044 | 222.500701904297 | 0.00 | 1 |   |
| ;     |                  |      |   |   |
| 25045 | 220              | 0.09 | 1 | ; |
| 25046 | 214.82014465332  | 0.00 | 1 | ; |
| 25048 | 229.971099853516 | 0.00 | 1 |   |
| ;     |                  |      |   |   |
| 25049 | 202.013534545898 | 0.00 | 1 |   |
| ;     |                  |      |   |   |
| 25050 | 202.244857788086 | 0.01 | 1 |   |
| ;     |                  |      |   |   |
| 25051 | 203.107604980469 | 0.02 | 1 |   |
| ;     |                  |      |   |   |
| 25052 | 220.170257568359 | 0.01 | 1 |   |
| ;     |                  |      |   |   |
| 25053 | 236.161392211914 | 0.05 | 1 |   |
| ;     |                  |      |   |   |
| 25054 | 205.14192199707  | 0.03 | 1 | ; |
| 25055 | 190.763305664063 | 0.02 | 1 |   |
| ;     |                  |      |   |   |

|       |                  |      |   |   |
|-------|------------------|------|---|---|
| 25056 | 232.184280395508 | 0.00 | 1 |   |
| ;     |                  |      |   |   |
| 25057 | 230              | 0.00 | 1 | ; |
| 25058 | 230              | 0.00 | 1 | ; |
| 25059 | 222.047668457031 | 0.02 | 1 |   |
| ;     |                  |      |   |   |
| 25060 | 190.214202880859 | 0.02 | 1 |   |
| ;     |                  |      |   |   |
| 25061 | 208.722869873047 | 0.02 | 1 |   |
| ;     |                  |      |   |   |
| 25062 | 214.109191894531 | 0.02 | 1 |   |
| ;     |                  |      |   |   |
| 25063 | 217.890991210938 | 0.07 | 1 |   |
| ;     |                  |      |   |   |
| 25064 | 241.89           | 0.00 | 1 | ; |
| 25065 | 208.938140869141 | 0.21 | 1 |   |
| ;     |                  |      |   |   |
| 25066 | 196.235626220703 | 0.06 | 1 |   |
| ;     |                  |      |   |   |
| 25067 | 193.486022949219 | 0.00 | 1 |   |
| ;     |                  |      |   |   |
| 25068 | 207.77880859375  | 0.03 | 1 | ; |
| 25069 | 201.301803588867 | 0.07 | 1 |   |
| ;     |                  |      |   |   |
| 25070 | 199.87939453125  | 0.02 | 1 | ; |
| 25071 | 203.739883422852 | 0.13 | 1 |   |
| ;     |                  |      |   |   |
| 25072 | 219.284103393555 | 0.01 | 1 |   |
| ;     |                  |      |   |   |
| 25073 | 202.265579223633 | 0.01 | 1 |   |
| ;     |                  |      |   |   |
| 25074 | 221.834854125977 | 0.00 | 1 |   |
| ;     |                  |      |   |   |
| 25075 | 197.264175415039 | 0.00 | 1 |   |
| ;     |                  |      |   |   |
| 25076 | 196.011871337891 | 0.00 | 1 |   |
| ;     |                  |      |   |   |
| 25077 | 197.742721557617 | 0.00 | 1 |   |
| ;     |                  |      |   |   |
| 25078 | 196.465560913086 | 0.00 | 1 |   |
| ;     |                  |      |   |   |
| 25079 | 194.669891357422 | 0.00 | 1 |   |
| ;     |                  |      |   |   |
| 25080 | 207.312911987305 | 0.00 | 1 |   |
| ;     |                  |      |   |   |
| 25081 | 205.232818603516 | 0.00 | 1 |   |
| ;     |                  |      |   |   |
| 25082 | 207.865356445313 | 0.00 | 1 |   |
| ;     |                  |      |   |   |
| 25083 | 207.965805053711 | 0.00 | 1 |   |

|       |                   |      |   |   |
|-------|-------------------|------|---|---|
| ;     |                   |      |   |   |
| 25084 | 207.942749023438  | 0.00 | 1 |   |
| ;     |                   |      |   |   |
| 25085 | 233.930297851563  | 0.00 | 1 |   |
| ;     |                   |      |   |   |
| 25086 | 214.089340209961  | 0.00 | 1 |   |
| ;     |                   |      |   |   |
| 25087 | 214.903121948242  | 0.00 | 1 |   |
| ;     |                   |      |   |   |
| 25088 | 213.771911621094  | 0.00 | 1 |   |
| ;     |                   |      |   |   |
| 25089 | 212.874130249023  | 0.00 | 1 |   |
| ;     |                   |      |   |   |
| 25090 | 214.195159912109  | 0.00 | 1 |   |
| ;     |                   |      |   |   |
| 25091 | 213.120147705078  | 0.00 | 1 |   |
| ;     |                   |      |   |   |
| 25092 | 212.916885375977  | 0.00 | 1 |   |
| ;     |                   |      |   |   |
| 25093 | 213.039535522461  | 0.01 | 1 |   |
| ;     |                   |      |   |   |
| 25094 | 212.459167480469  | 0.00 | 1 |   |
| ;     |                   |      |   |   |
| 25095 | 211.403930664063  | 0.00 | 1 |   |
| ;     |                   |      |   |   |
| 25096 | 214.51545715332   | 0.00 | 1 |   |
| 25097 | 209.514053344727  | 0.00 | 1 | ; |
| ;     |                   |      |   |   |
| 25098 | 209.849349975586  | 0.00 | 1 |   |
| ;     |                   |      |   |   |
| 25099 | 207.3920444067383 | 0.00 | 1 |   |
| ;     |                   |      |   |   |
| 25100 | 218.971939086914  | 0.00 | 1 |   |
| ;     |                   |      |   |   |
| 25101 | 220.747024536133  | 0.00 | 1 |   |
| ;     |                   |      |   |   |
| 25102 | 222.760467529297  | 0.00 | 1 |   |
| ;     |                   |      |   |   |
| 25103 | 220.242385864258  | 0.00 | 1 |   |
| ;     |                   |      |   |   |
| 25104 | 199.790267944336  | 0.00 | 1 |   |
| ;     |                   |      |   |   |
| 25105 | 199.033584594727  | 0.00 | 1 |   |
| ;     |                   |      |   |   |
| 25106 | 199.734436035156  | 0.00 | 1 |   |
| ;     |                   |      |   |   |
| 25107 | 199.963973999023  | 0.00 | 1 |   |
| ;     |                   |      |   |   |
| 25108 | 216.982299804688  | 0.00 | 1 |   |
| ;     |                   |      |   |   |

|       |                  |      |   |   |
|-------|------------------|------|---|---|
| 25109 | 217.512130737305 | 0.00 | 1 |   |
| ;     |                  |      |   |   |
| 25110 | 200.453887939453 | 0.00 | 1 |   |
| ;     |                  |      |   |   |
| 25111 | 199.445251464844 | 0.00 | 1 |   |
| ;     |                  |      |   |   |
| 25112 | 199.612823486328 | 0.00 | 1 |   |
| ;     |                  |      |   |   |
| 25113 | 205.006301879883 | 0.00 | 1 |   |
| ;     |                  |      |   |   |
| 25114 | 206.860198974609 | 0.00 | 1 |   |
| ;     |                  |      |   |   |
| 25115 | 216.560607910156 | 0.00 | 1 |   |
| ;     |                  |      |   |   |
| 25116 | 219.131942749023 | 0.00 | 1 |   |
| ;     |                  |      |   |   |
| 25117 | 218.675827026367 | 0.00 | 1 |   |
| ;     |                  |      |   |   |
| 25118 | 219.716674804688 | 0.00 | 1 |   |
| ;     |                  |      |   |   |
| 25119 | 217.683868408203 | 0.00 | 1 |   |
| ;     |                  |      |   |   |
| 25120 | 197.59831237793  | 0.00 | 1 |   |
| 25121 | 195.969802856445 | 0.00 | 1 | ; |
| ;     |                  |      |   |   |
| 25122 | 207.347991943359 | 0.00 | 1 |   |
| ;     |                  |      |   |   |
| 25123 | 219.33984375     | 0.00 | 1 | ; |
| 25124 | 207.96076965332  | 0.00 | 1 | ; |
| 25125 | 190.933746337891 | 0.00 | 1 |   |
| ;     |                  |      |   |   |
| 25126 | 205.26335144043  | 0.00 | 1 | ; |
| 25127 | 217.668807983398 | 0.00 | 1 |   |
| ;     |                  |      |   |   |
| 25128 | 216.82763671875  | 0.00 | 1 | ; |
| 25129 | 192.855682373047 | 0.00 | 1 |   |
| ;     |                  |      |   |   |
| 25130 | 194.58447265625  | 0.00 | 1 | ; |
| 25131 | 199.750762939453 | 0.00 | 1 |   |
| ;     |                  |      |   |   |
| 25132 | 199.443237304688 | 0.00 | 1 |   |
| ;     |                  |      |   |   |
| 25133 | 200              | 0.11 | 1 | ; |
| 25134 | 195.533172607422 | 0.02 | 1 |   |
| ;     |                  |      |   |   |
| 25135 | 209.643936157227 | 0.00 | 1 |   |
| ;     |                  |      |   |   |
| 25136 | 210              | 0.03 | 1 | ; |
| 25137 | 207.787414550781 | 0.03 | 1 |   |
| ;     |                  |      |   |   |



|       |                  |      |   |   |
|-------|------------------|------|---|---|
| 25138 | 196.394989013672 | 0.04 | 1 |   |
| ;     |                  |      |   |   |
| 25139 | 202.441345214844 | 0.04 | 1 |   |
| ;     |                  |      |   |   |
| 25140 | 212.600311279297 | 0.07 | 1 |   |
| ;     |                  |      |   |   |
| 25141 | 212.615646362305 | 0.15 | 1 |   |
| ;     |                  |      |   |   |
| 25142 | 206.931549072266 | 0.09 | 1 |   |
| ;     |                  |      |   |   |
| 25143 | 208.910095214844 | 0.01 | 1 |   |
| ;     |                  |      |   |   |
| 25144 | 205              | 0.02 | 1 |   |
| 25145 | 206.474792480469 | 0.02 | 1 | ; |
| ;     |                  |      |   |   |
| 25146 | 205.692810058594 | 0.03 | 1 |   |
| ;     |                  |      |   |   |
| 25147 | 213.370590209961 | 0.01 | 1 |   |
| ;     |                  |      |   |   |
| 25148 | 204.244659423828 | 0.37 | 1 |   |
| ;     |                  |      |   |   |
| 25149 | 213.614990234375 | 0.03 | 1 |   |
| ;     |                  |      |   |   |
| 25150 | 212.382034301758 | 0.04 | 1 |   |
| ;     |                  |      |   |   |
| 25151 | 207.449615478516 | 0.03 | 1 |   |
| ;     |                  |      |   |   |
| 25152 | 207.276260375977 | 0.04 | 1 |   |
| ;     |                  |      |   |   |
| 25153 | 200              | 0.01 | 1 |   |
| 25154 | 203.688690185547 | 0.09 | 1 | ; |
| ;     |                  |      |   |   |
| 25155 | 202.345901489258 | 0.00 | 1 |   |
| ;     |                  |      |   |   |
| 25156 | 219.762802124023 | 0.08 | 1 |   |
| ;     |                  |      |   |   |
| 25157 | 210.976715087891 | 0.00 | 1 |   |
| ;     |                  |      |   |   |
| 25158 | 211.606033325195 | 0.00 | 1 |   |
| ;     |                  |      |   |   |
| 25159 | 198.457931518555 | 0.01 | 1 |   |
| ;     |                  |      |   |   |
| 25160 | 218.075531005859 | 0.03 | 1 |   |
| ;     |                  |      |   |   |
| 25161 | 218.471969604492 | 0.10 | 1 |   |
| ;     |                  |      |   |   |
| 25162 | 205              | 0.00 | 1 |   |
| 25163 | 205.3505859375   | 0.00 | 1 | ; |
| 25164 | 205.477432250977 | 0.00 | 1 | ; |
| ;     |                  |      |   |   |

|       |                  |      |   |   |
|-------|------------------|------|---|---|
| 25165 | 207.188522338867 | 0.00 | 1 |   |
| ;     |                  |      |   |   |
| 25166 | 208.380950927734 | 0.00 | 1 |   |
| ;     |                  |      |   |   |
| 25167 | 208.360168457031 | 0.00 | 1 |   |
| ;     |                  |      |   |   |
| 25168 | 208.100799560547 | 0.00 | 1 |   |
| ;     |                  |      |   |   |
| 25169 | 200.119491577148 | 0.00 | 1 |   |
| ;     |                  |      |   |   |
| 25170 | 212.359893798828 | 0.00 | 1 |   |
| ;     |                  |      |   |   |
| 25171 | 210.552276611328 | 0.00 | 1 |   |
| ;     |                  |      |   |   |
| 25172 | 221.437210083008 | 0.00 | 1 |   |
| ;     |                  |      |   |   |
| 25173 | 202.998886108398 | 0.00 | 1 |   |
| ;     |                  |      |   |   |
| 25174 | 203.075454711914 | 0.00 | 1 |   |
| ;     |                  |      |   |   |
| 25175 | 202.421539306641 | 0.00 | 1 |   |
| ;     |                  |      |   |   |
| 25176 | 204.623550415039 | 0.00 | 1 |   |
| ;     |                  |      |   |   |
| 25177 | 203.243347167969 | 0.00 | 1 |   |
| ;     |                  |      |   |   |
| 25178 | 193.717330932617 | 0.00 | 1 |   |
| ;     |                  |      |   |   |
| 25179 | 193.125991821289 | 0.00 | 1 |   |
| ;     |                  |      |   |   |
| 25180 | 199.284423828125 | 0.00 | 1 |   |
| ;     |                  |      |   |   |
| 25181 | 199.05793762207  | 0.00 | 1 |   |
| 25182 | 198.637481689453 | 0.00 | 1 | ; |
| ;     |                  |      |   |   |
| 25183 | 198.005020141602 | 0.00 | 1 |   |
| ;     |                  |      |   |   |
| 25184 | 198.241455078125 | 0.00 | 1 |   |
| ;     |                  |      |   |   |
| 25185 | 197.795043945313 | 0.00 | 1 |   |
| ;     |                  |      |   |   |
| 25186 | 197.197631835938 | 0.00 | 1 |   |
| ;     |                  |      |   |   |
| 25187 | 196.184356689453 | 0.00 | 1 |   |
| ;     |                  |      |   |   |
| 25188 | 197.318496704102 | 0.00 | 1 |   |
| ;     |                  |      |   |   |
| 25189 | 196.935455322266 | 0.00 | 1 |   |
| ;     |                  |      |   |   |
| 25190 | 198.307098388672 | 0.00 | 1 |   |

|       |                  |      |   |   |
|-------|------------------|------|---|---|
| ;     |                  |      |   |   |
| 25191 | 196.739288330078 | 0.00 | 1 |   |
| ;     |                  |      |   |   |
| 25192 | 197.365676879883 | 0.00 | 1 |   |
| ;     |                  |      |   |   |
| 25193 | 197.484725952148 | 0.00 | 1 |   |
| ;     |                  |      |   |   |
| 25194 | 196.415084838867 | 0.00 | 1 |   |
| ;     |                  |      |   |   |
| 25195 | 196.264541625977 | 0.00 | 1 |   |
| ;     |                  |      |   |   |
| 25196 | 196.001327514648 | 0.00 | 1 |   |
| ;     |                  |      |   |   |
| 25197 | 220.311019897461 | 0.00 | 1 |   |
| ;     |                  |      |   |   |
| 25198 | 234.199371337891 | 0.00 | 1 |   |
| ;     |                  |      |   |   |
| 25199 | 234.046783447266 | 0.00 | 1 |   |
| ;     |                  |      |   |   |
| 25200 | 233.759780883789 | 0.00 | 1 |   |
| ;     |                  |      |   |   |
| 25201 | 236.740295410156 | 0.00 | 1 |   |
| ;     |                  |      |   |   |
| 25202 | 202.966094970703 | 0.00 | 1 |   |
| ;     |                  |      |   |   |
| 25203 | 202.612197875977 | 0.01 | 1 |   |
| ;     |                  |      |   |   |
| 25204 | 229.696838378906 | 0.00 | 1 |   |
| ;     |                  |      |   |   |
| 25205 | 216.644409179688 | 0.00 | 1 |   |
| ;     |                  |      |   |   |
| 25206 | 198.37190246582  | 0.00 | 1 |   |
| 25207 | 197.491104125977 | 0.00 | 1 | ; |
| ;     |                  |      |   |   |
| 25208 | 204.393936157227 | 0.00 | 1 |   |
| ;     |                  |      |   |   |
| 25209 | 205.020355224609 | 0.00 | 1 |   |
| ;     |                  |      |   |   |
| 25210 | 205.846542358398 | 0.00 | 1 |   |
| ;     |                  |      |   |   |
| 25211 | 196.297836303711 | 0.00 | 1 |   |
| ;     |                  |      |   |   |
| 25212 | 197.899871826172 | 0.00 | 1 |   |
| ;     |                  |      |   |   |
| 25213 | 205.748550415039 | 0.00 | 1 |   |
| ;     |                  |      |   |   |
| 25214 | 208.117645263672 | 0.00 | 1 |   |
| ;     |                  |      |   |   |
| 25215 | 207.314682006836 | 0.00 | 1 |   |
| ;     |                  |      |   |   |

|       |                  |      |   |   |
|-------|------------------|------|---|---|
| 25216 | 206.726669311523 | 0.00 | 1 |   |
| ;     |                  |      |   |   |
| 25217 | 205              | 0.00 | 1 | ; |
| 25218 | 205              | 0.00 | 1 | ; |
| 25219 | 205              | 0.00 | 1 | ; |
| 25220 | 206.14697265625  | 0.00 | 1 | ; |
| 25221 | 205.792953491211 | 0.00 | 1 |   |
| ;     |                  |      |   |   |
| 25222 | 204.780990600586 | 0.00 | 1 |   |
| ;     |                  |      |   |   |
| 25223 | 205.038101196289 | 0.00 | 1 |   |
| ;     |                  |      |   |   |
| 25224 | 204.481170654297 | 0.00 | 1 |   |
| ;     |                  |      |   |   |
| 25225 | 203.717697143555 | 0.00 | 1 |   |
| ;     |                  |      |   |   |
| 25226 | 203.821441650391 | 0.00 | 1 |   |
| ;     |                  |      |   |   |
| 25227 | 203.085479736328 | 0.00 | 1 |   |
| ;     |                  |      |   |   |
| 25228 | 217.200210571289 | 0.00 | 1 |   |
| ;     |                  |      |   |   |
| 25229 | 216.298446655273 | 0.00 | 1 |   |
| ;     |                  |      |   |   |
| 25230 | 215.958984375    | 0.00 | 1 | ; |
| 25231 | 215.772171020508 | 0.00 | 1 |   |
| ;     |                  |      |   |   |
| 25232 | 214.986587524414 | 0.00 | 1 |   |
| ;     |                  |      |   |   |
| 25233 | 214.633285522461 | 0.00 | 1 |   |
| ;     |                  |      |   |   |
| 25234 | 215.534225463867 | 0.01 | 1 |   |
| ;     |                  |      |   |   |
| 25235 | 214.592178344727 | 0.00 | 1 |   |
| ;     |                  |      |   |   |
| 25236 | 216.268264770508 | 0.00 | 1 |   |
| ;     |                  |      |   |   |
| 25237 | 215.092514038086 | 0.00 | 1 |   |
| ;     |                  |      |   |   |
| 25238 | 214.967514038086 | 0.00 | 1 |   |
| ;     |                  |      |   |   |
| 25239 | 214.324844360352 | 0.00 | 1 |   |
| ;     |                  |      |   |   |
| 25240 | 213.846435546875 | 0.00 | 1 |   |
| ;     |                  |      |   |   |
| 25241 | 213.750579833984 | 0.00 | 1 |   |
| ;     |                  |      |   |   |
| 25242 | 213.803161621094 | 0.00 | 1 |   |
| ;     |                  |      |   |   |
| 25243 | 207.853057861328 | 0.00 | 1 |   |

|       |                  |      |   |  |   |
|-------|------------------|------|---|--|---|
| ;     |                  |      |   |  |   |
| 25244 | 208.925689697266 | 0.00 | 1 |  |   |
| ;     |                  |      |   |  |   |
| 25245 | 207.811676025391 | 0.00 | 1 |  |   |
| ;     |                  |      |   |  |   |
| 25246 | 206.781585693359 | 0.00 | 1 |  |   |
| ;     |                  |      |   |  |   |
| 25247 | 206.211120605469 | 0.00 | 1 |  |   |
| ;     |                  |      |   |  |   |
| 25248 | 207.371017456055 | 0.00 | 1 |  |   |
| ;     |                  |      |   |  |   |
| 25249 | 205              | 0.00 | 1 |  | ; |
| 25250 | 205.734573364258 | 0.00 | 1 |  |   |
| ;     |                  |      |   |  |   |
| 25251 | 206.456756591797 | 0.00 | 1 |  |   |
| ;     |                  |      |   |  |   |
| 25252 | 205.850387573242 | 0.00 | 1 |  |   |
| ;     |                  |      |   |  |   |
| 25253 | 209.168518066406 | 0.00 | 1 |  |   |
| ;     |                  |      |   |  |   |
| 25254 | 208.46760559082  | 0.00 | 1 |  | ; |
| 25255 | 209.122802734375 | 0.00 | 1 |  |   |
| ;     |                  |      |   |  |   |
| 25256 | 198.10905456543  | 0.00 | 1 |  | ; |
| 25257 | 198.401885986328 | 0.00 | 1 |  |   |
| ;     |                  |      |   |  |   |
| 25258 | 198.184295654297 | 0.00 | 1 |  |   |
| ;     |                  |      |   |  |   |
| 25259 | 199.321807861328 | 0.00 | 1 |  |   |
| ;     |                  |      |   |  |   |
| 25260 | 195.919342041016 | 0.00 | 1 |  |   |
| ;     |                  |      |   |  |   |
| 25261 | 195.383850097656 | 0.00 | 1 |  |   |
| ;     |                  |      |   |  |   |
| 25262 | 196.33805847168  | 0.00 | 1 |  | ; |
| 25263 | 195.798629760742 | 0.00 | 1 |  |   |
| ;     |                  |      |   |  |   |
| 25264 | 198.851013183594 | 0.00 | 1 |  |   |
| ;     |                  |      |   |  |   |
| 25265 | 199.627151489258 | 0.00 | 1 |  |   |
| ;     |                  |      |   |  |   |
| 25266 | 219.934936523438 | 0.00 | 1 |  |   |
| ;     |                  |      |   |  |   |
| 25267 | 207.833709716797 | 0.00 | 1 |  |   |
| ;     |                  |      |   |  |   |
| 25268 | 211.717483520508 | 0.00 | 1 |  |   |
| ;     |                  |      |   |  |   |
| 25269 | 210.573471069336 | 0.00 | 1 |  |   |
| ;     |                  |      |   |  |   |
| 25270 | 209.505233764648 | 0.00 | 1 |  |   |

|       |                  |      |   |   |   |
|-------|------------------|------|---|---|---|
| ;     |                  |      |   |   |   |
| 25271 | 210.029479980469 | 0.00 |   | 1 |   |
| ;     |                  |      |   |   |   |
| 25272 | 225.341705322266 | 0.00 |   | 1 |   |
| ;     |                  |      |   |   |   |
| 25273 | 225.174667358398 | 0.00 |   | 1 |   |
| ;     |                  |      |   |   |   |
| 25274 | 225.710998535156 | 0.00 |   | 1 |   |
| ;     |                  |      |   |   |   |
| 25275 | 223.107833862305 | 0.00 |   | 1 |   |
| ;     |                  |      |   |   |   |
| 25276 | 221.658752441406 | 0.00 |   | 1 |   |
| ;     |                  |      |   |   |   |
| 25277 | 200.487121582031 | 0.00 |   | 1 |   |
| ;     |                  |      |   |   |   |
| 25278 | 236.788726806641 | 0.00 |   | 1 |   |
| ;     |                  |      |   |   |   |
| 25279 | 235.575912475586 | 0.00 |   | 1 |   |
| ;     |                  |      |   |   |   |
| 25280 | 234.403991699219 | 0.00 |   | 1 |   |
| ;     |                  |      |   |   |   |
| 25281 | 232.754837036133 | 0.00 |   | 1 |   |
| ;     |                  |      |   |   |   |
| 25282 | 230.932632446289 | 0.00 |   | 1 |   |
| ;     |                  |      |   |   |   |
| 25283 | 229.307922363281 | 0.00 |   | 1 |   |
| ;     |                  |      |   |   |   |
| 25284 | 228.464004516602 | 0.00 |   | 1 |   |
| ;     |                  |      |   |   |   |
| 25285 | 228.22966003418  | 0.00 | 1 |   | ; |
| 25286 | 218.806060791016 | 0.00 |   | 1 |   |
| ;     |                  |      |   |   |   |
| 25287 | 209.519348144531 | 0.00 |   | 1 |   |
| ;     |                  |      |   |   |   |
| 25288 | 202.215179443359 | 0.00 |   | 1 |   |
| ;     |                  |      |   |   |   |
| 25289 | 201.069030761719 | 0.00 |   | 1 |   |
| ;     |                  |      |   |   |   |
| 25290 | 201.357284545898 | 0.00 |   | 1 |   |
| ;     |                  |      |   |   |   |
| 25291 | 200.686248779297 | 0.00 |   | 1 |   |
| ;     |                  |      |   |   |   |
| 25292 | 210              | 0.00 | 1 |   | ; |
| 25293 | 209.650512695313 | 0.00 |   | 1 |   |
| ;     |                  |      |   |   |   |
| 25294 | 209.150634765625 | 0.00 |   | 1 |   |
| ;     |                  |      |   |   |   |
| 25295 | 208.179214477539 | 0.00 |   | 1 |   |
| ;     |                  |      |   |   |   |
| 25296 | 208.418762207031 | 0.01 |   | 1 |   |

|       |                  |      |   |   |  |   |
|-------|------------------|------|---|---|--|---|
| ;     |                  |      |   |   |  |   |
| 25297 | 209.75           | 0.00 | 1 |   |  | ; |
| 25298 | 201.85807800293  | 0.00 | 1 |   |  | ; |
| 25299 | 200.964218139648 | 0.00 |   | 1 |  |   |
| ;     |                  |      |   |   |  |   |
| 25300 | 224.095977783203 | 0.00 |   | 1 |  |   |
| ;     |                  |      |   |   |  |   |
| 25301 | 224.876068115234 | 0.00 |   | 1 |  |   |
| ;     |                  |      |   |   |  |   |
| 25302 | 231.073715209961 | 0.00 |   | 1 |  |   |
| ;     |                  |      |   |   |  |   |
| 25303 | 208.800354003906 | 0.00 |   | 1 |  |   |
| ;     |                  |      |   |   |  |   |
| 25304 | 191.064834594727 | 0.00 |   | 1 |  |   |
| ;     |                  |      |   |   |  |   |
| 25305 | 217.520004272461 | 0.01 |   | 1 |  |   |
| ;     |                  |      |   |   |  |   |
| 25306 | 208.34765625     | 0.00 | 1 |   |  | ; |
| 25307 | 208.065246582031 | 0.00 |   | 1 |  |   |
| ;     |                  |      |   |   |  |   |
| 25308 | 208.473236083984 | 0.00 |   | 1 |  |   |
| ;     |                  |      |   |   |  |   |
| 25309 | 208.561340332031 | 0.00 |   | 1 |  |   |
| ;     |                  |      |   |   |  |   |
| 25310 | 207.917221069336 | 0.00 |   | 1 |  |   |
| ;     |                  |      |   |   |  |   |
| 25311 | 206.946914672852 | 0.00 |   | 1 |  |   |
| ;     |                  |      |   |   |  |   |
| 25312 | 206.299179077148 | 0.00 |   | 1 |  |   |
| ;     |                  |      |   |   |  |   |
| 25313 | 207.341049194336 | 0.00 |   | 1 |  |   |
| ;     |                  |      |   |   |  |   |
| 25314 | 205.970230102539 | 0.00 |   | 1 |  |   |
| ;     |                  |      |   |   |  |   |
| 25315 | 207.523788452148 | 0.00 |   | 1 |  |   |
| ;     |                  |      |   |   |  |   |
| 25316 | 206.990203857422 | 0.00 |   | 1 |  |   |
| ;     |                  |      |   |   |  |   |
| 25317 | 206.959533691406 | 0.00 |   | 1 |  |   |
| ;     |                  |      |   |   |  |   |
| 25318 | 219.190795898438 | 0.00 |   | 1 |  |   |
| ;     |                  |      |   |   |  |   |
| 25319 | 219.179534912109 | 0.00 |   | 1 |  |   |
| ;     |                  |      |   |   |  |   |
| 25320 | 218.20637512207  | 0.00 | 1 |   |  | ; |
| 25321 | 218.594329833984 | 0.00 |   | 1 |  |   |
| ;     |                  |      |   |   |  |   |
| 25322 | 218.390487670898 | 0.00 |   | 1 |  |   |
| ;     |                  |      |   |   |  |   |
| 25323 | 219.984970092773 | 0.00 |   | 1 |  |   |

|       |                  |      |   |   |   |
|-------|------------------|------|---|---|---|
| ;     |                  |      |   |   |   |
| 25324 | 228.025314331055 | 0.00 |   | 1 |   |
| ;     |                  |      |   |   |   |
| 25325 | 231.438125610352 | 0.00 |   | 1 |   |
| ;     |                  |      |   |   |   |
| 25326 | 219.536804199219 | 0.00 |   | 1 |   |
| ;     |                  |      |   |   |   |
| 25327 | 208.381713867187 | 0.00 |   | 1 |   |
| ;     |                  |      |   |   |   |
| 25328 | 228.167526245117 | 0.00 |   | 1 |   |
| ;     |                  |      |   |   |   |
| 25329 | 226.465927124023 | 0.00 |   | 1 |   |
| ;     |                  |      |   |   |   |
| 25330 | 227.674758911133 | 0.00 |   | 1 |   |
| ;     |                  |      |   |   |   |
| 25331 | 228.435592651367 | 0.00 |   | 1 |   |
| ;     |                  |      |   |   |   |
| 25332 | 227.060424804688 | 0.00 |   | 1 |   |
| ;     |                  |      |   |   |   |
| 25333 | 225.774993896484 | 0.00 |   | 1 |   |
| ;     |                  |      |   |   |   |
| 25334 | 226.13069152832  | 0.00 | 1 |   | ; |
| 25335 | 226.787933349609 | 0.00 |   | 1 |   |
| ;     |                  |      |   |   |   |
| 25336 | 226.756439208984 | 0.00 |   | 1 |   |
| ;     |                  |      |   |   |   |
| 25337 | 225.538635253906 | 0.00 |   | 1 |   |
| ;     |                  |      |   |   |   |
| 25338 | 226.651565551758 | 0.00 |   | 1 |   |
| ;     |                  |      |   |   |   |
| 25339 | 227.210433959961 | 0.00 |   | 1 |   |
| ;     |                  |      |   |   |   |
| 25340 | 224.189804077148 | 0.00 |   | 1 |   |
| ;     |                  |      |   |   |   |
| 25341 | 223.135177612305 | 0.00 |   | 1 |   |
| ;     |                  |      |   |   |   |
| 25342 | 230.377502441406 | 0.00 |   | 1 |   |
| ;     |                  |      |   |   |   |
| 25343 | 229.179946899414 | 0.00 |   | 1 |   |
| ;     |                  |      |   |   |   |
| 25344 | 229.921844482422 | 0.00 |   | 1 |   |
| ;     |                  |      |   |   |   |
| 25345 | 228.601928710938 | 0.00 |   | 1 |   |
| ;     |                  |      |   |   |   |
| 25346 | 234.796234130859 | 0.00 |   | 1 |   |
| ;     |                  |      |   |   |   |
| 25347 | 233.115829467773 | 0.00 |   | 1 |   |
| ;     |                  |      |   |   |   |
| 25348 | 233.579650878906 | 0.00 |   | 1 |   |
| ;     |                  |      |   |   |   |



|       |                  |      |   |   |
|-------|------------------|------|---|---|
| 25349 | 232.681304931641 | 0.00 | 1 |   |
| ;     |                  |      |   |   |
| 25350 | 231.145004272461 | 0.00 | 1 |   |
| ;     |                  |      |   |   |
| 25351 | 232.185562133789 | 0.00 | 1 |   |
| ;     |                  |      |   |   |
| 25352 | 232.537475585938 | 0.01 | 1 |   |
| ;     |                  |      |   |   |
| 25353 | 231.914520263672 | 0.00 | 1 |   |
| ;     |                  |      |   |   |
| 25354 | 229.875          | 0.00 | 1 |   |
| 25355 | 229.977615356445 | 0.00 | 1 | ; |
| ;     |                  |      |   |   |
| 25356 | 229.607879638672 | 0.00 | 1 |   |
| ;     |                  |      |   |   |
| 25357 | 229.476501464844 | 0.00 | 1 |   |
| ;     |                  |      |   |   |
| 25358 | 229.905197143555 | 0.00 | 1 |   |
| ;     |                  |      |   |   |
| 25359 | 228.05517578125  | 0.00 | 1 |   |
| 25360 | 227.594985961914 | 0.00 | 1 | ; |
| ;     |                  |      |   |   |
| 25361 | 233.169036865234 | 0.00 | 1 |   |
| ;     |                  |      |   |   |
| 25362 | 206.175323486328 | 0.00 | 1 |   |
| ;     |                  |      |   |   |
| 25363 | 202.547180175781 | 0.00 | 1 |   |
| ;     |                  |      |   |   |
| 25364 | 198.433975219727 | 0.00 | 1 |   |
| ;     |                  |      |   |   |
| 25365 | 199.582183837891 | 0.00 | 1 |   |
| ;     |                  |      |   |   |
| 25366 | 204.902542114258 | 0.00 | 1 |   |
| ;     |                  |      |   |   |
| 25367 | 204.144989013672 | 0.00 | 1 |   |
| ;     |                  |      |   |   |
| 25368 | 202.966888427734 | 0.00 | 1 |   |
| ;     |                  |      |   |   |
| 25369 | 202.141510009766 | 0.00 | 1 |   |
| ;     |                  |      |   |   |
| 25370 | 202.628555297852 | 0.00 | 1 |   |
| ;     |                  |      |   |   |
| 25371 | 200.418121337891 | 0.00 | 1 |   |
| ;     |                  |      |   |   |
| 25372 | 219.377059936523 | 0.00 | 1 |   |
| ;     |                  |      |   |   |
| 25373 | 218.897857666016 | 0.00 | 1 |   |
| ;     |                  |      |   |   |
| 25374 | 207.848602294922 | 0.00 | 1 |   |
| ;     |                  |      |   |   |

|       |                  |      |   |   |
|-------|------------------|------|---|---|
| 25375 | 208.357116699219 | 0.00 | 1 |   |
| ;     |                  |      |   |   |
| 25376 | 203.250137329102 | 0.00 | 1 |   |
| ;     |                  |      |   |   |
| 25377 | 218.645004272461 | 0.00 | 1 |   |
| ;     |                  |      |   |   |
| 25378 | 217.919174194336 | 0.00 | 1 |   |
| ;     |                  |      |   |   |
| 25379 | 217.149108886719 | 0.00 | 1 |   |
| ;     |                  |      |   |   |
| 25380 | 217.438446044922 | 0.00 | 1 |   |
| ;     |                  |      |   |   |
| 25381 | 217.658660888672 | 0.00 | 1 |   |
| ;     |                  |      |   |   |
| 25382 | 204.806228637695 | 0.00 | 1 |   |
| ;     |                  |      |   |   |
| 25383 | 203.827789306641 | 0.00 | 1 |   |
| ;     |                  |      |   |   |
| 25384 | 202.357955932617 | 0.00 | 1 |   |
| ;     |                  |      |   |   |
| 25385 | 200.989883422852 | 0.00 | 1 |   |
| ;     |                  |      |   |   |
| 25386 | 204.140213012695 | 0.00 | 1 |   |
| ;     |                  |      |   |   |
| 25387 | 203.749771118164 | 0.00 | 1 |   |
| ;     |                  |      |   |   |
| 25388 | 204.427398681641 | 0.00 | 1 |   |
| ;     |                  |      |   |   |
| 25389 | 203.969329833984 | 0.00 | 1 |   |
| ;     |                  |      |   |   |
| 25390 | 203.247360229492 | 0.00 | 1 |   |
| ;     |                  |      |   |   |
| 25391 | 202.603057861328 | 0.00 | 1 |   |
| ;     |                  |      |   |   |
| 25392 | 202.492446899414 | 0.00 | 1 |   |
| ;     |                  |      |   |   |
| 25393 | 222.0576171875   | 0.00 | 1 |   |
| 25394 | 222.174407958984 | 0.00 | 1 | ; |
| ;     |                  |      |   |   |
| 25395 | 220.94482421875  | 0.00 | 1 |   |
| 25396 | 221.707168579102 | 0.00 | 1 | ; |
| ;     |                  |      |   |   |
| 25397 | 221.401245117188 | 0.00 | 1 |   |
| ;     |                  |      |   |   |
| 25398 | 200.952545166016 | 0.00 | 1 |   |
| ;     |                  |      |   |   |
| 25399 | 203.015686035156 | 0.00 | 1 |   |
| ;     |                  |      |   |   |
| 25400 | 202.316558837891 | 0.00 | 1 |   |
| ;     |                  |      |   |   |

|       |                  |      |   |  |
|-------|------------------|------|---|--|
| 25401 | 203.256057739258 | 0.00 | 1 |  |
| ;     |                  |      |   |  |
| 25402 | 203.427429199219 | 0.00 | 1 |  |
| ;     |                  |      |   |  |
| 25403 | 201.638305664063 | 0.00 | 1 |  |
| ;     |                  |      |   |  |
| 25404 | 200.717758178711 | 0.00 | 1 |  |
| ;     |                  |      |   |  |
| 25405 | 201.322830200195 | 0.00 | 1 |  |
| ;     |                  |      |   |  |
| 25406 | 201.917037963867 | 0.00 | 1 |  |
| ;     |                  |      |   |  |
| 25407 | 200              | 0.00 | 1 |  |
| 25408 | 199.734466552734 | 0.00 | 1 |  |
| ;     |                  |      |   |  |
| 25409 | 199.248245239258 | 0.00 | 1 |  |
| ;     |                  |      |   |  |
| 25410 | 205.417495727539 | 0.00 | 1 |  |
| ;     |                  |      |   |  |
| 25411 | 201.422912597656 | 0.00 | 1 |  |
| ;     |                  |      |   |  |
| 25412 | 200.646682739258 | 0.00 | 1 |  |
| ;     |                  |      |   |  |
| 25413 | 200.952713012695 | 0.00 | 1 |  |
| ;     |                  |      |   |  |
| 25414 | 200.259384155273 | 0.00 | 1 |  |
| ;     |                  |      |   |  |
| 25415 | 209.483840942383 | 0.00 | 1 |  |
| ;     |                  |      |   |  |
| 25416 | 209.87077331543  | 0.00 | 1 |  |
| 25417 | 208.660171508789 | 0.00 | 1 |  |
| ;     |                  |      |   |  |
| 25418 | 208.901138305664 | 0.00 | 1 |  |
| ;     |                  |      |   |  |
| 25419 | 208.905181884766 | 0.00 | 1 |  |
| ;     |                  |      |   |  |
| 25420 | 209.208923339844 | 0.00 | 1 |  |
| ;     |                  |      |   |  |
| 25421 | 208.80632019043  | 0.00 | 1 |  |
| 25422 | 209.75           | 0.00 | 1 |  |
| 25423 | 231.323791503906 | 0.00 | 1 |  |
| ;     |                  |      |   |  |
| 25424 | 222.246658325195 | 0.00 | 1 |  |
| ;     |                  |      |   |  |
| 25425 | 203.6982421875   | 0.00 | 1 |  |
| 25426 | 200              | 0.00 | 1 |  |
| 25427 | 224.747817993164 | 0.00 | 1 |  |
| ;     |                  |      |   |  |
| 25428 | 222.99528503418  | 0.00 | 1 |  |
| 25429 | 221.536895751953 | 0.00 | 1 |  |

|       |                  |      |   |   |   |
|-------|------------------|------|---|---|---|
| ;     |                  |      |   |   |   |
| 25430 | 199.887573242188 | 0.00 |   | 1 |   |
| ;     |                  |      |   |   |   |
| 25431 | 200.536468505859 | 0.00 |   | 1 |   |
| ;     |                  |      |   |   |   |
| 25432 | 201.192398071289 | 0.00 |   | 1 |   |
| ;     |                  |      |   |   |   |
| 25433 | 199.820236206055 | 0.00 |   | 1 |   |
| ;     |                  |      |   |   |   |
| 25434 | 196.787643432617 | 0.00 |   | 1 |   |
| ;     |                  |      |   |   |   |
| 25435 | 203.680587768555 | 0.00 |   | 1 |   |
| ;     |                  |      |   |   |   |
| 25436 | 206.003662109375 | 0.00 |   | 1 |   |
| ;     |                  |      |   |   |   |
| 25437 | 215.05061340332  | 0.00 | 1 |   | ; |
| 25438 | 205.922637939453 | 0.00 |   | 1 |   |
| ;     |                  |      |   |   |   |
| 25439 | 217.013488769531 | 0.00 |   | 1 |   |
| ;     |                  |      |   |   |   |
| 25440 | 216.79313659668  | 0.00 | 1 |   | ; |
| 25441 | 209.733291625977 | 0.00 |   | 1 |   |
| ;     |                  |      |   |   |   |
| 25442 | 217.757919311523 | 0.00 |   | 1 |   |
| ;     |                  |      |   |   |   |
| 25443 | 215.621139526367 | 0.00 |   | 1 |   |
| ;     |                  |      |   |   |   |
| 25444 | 215.465179443359 | 0.00 |   | 1 |   |
| ;     |                  |      |   |   |   |
| 25445 | 192.702377319336 | 0.00 |   | 1 |   |
| ;     |                  |      |   |   |   |
| 25446 | 195.643859863281 | 0.00 |   | 1 |   |
| ;     |                  |      |   |   |   |
| 25447 | 193.683029174805 | 0.00 |   | 1 |   |
| ;     |                  |      |   |   |   |
| 25448 | 195.823272705078 | 0.00 |   | 1 |   |
| ;     |                  |      |   |   |   |
| 25449 | 199.579071044922 | 0.00 |   | 1 |   |
| ;     |                  |      |   |   |   |
| 25450 | 199.988632202148 | 0.00 |   | 1 |   |
| ;     |                  |      |   |   |   |
| 25451 | 200              | 0.00 | 1 |   | ; |
| 25452 | 199.697891235352 | 0.00 |   | 1 |   |
| ;     |                  |      |   |   |   |
| 25453 | 198.053421020508 | 0.00 |   | 1 |   |
| ;     |                  |      |   |   |   |
| 25454 | 198.993896484375 | 0.00 |   | 1 |   |
| ;     |                  |      |   |   |   |
| 25455 | 200.148345947266 | 0.00 |   | 1 |   |
| ;     |                  |      |   |   |   |

|       |                  |      |   |  |
|-------|------------------|------|---|--|
| 25456 | 200.299575805664 | 0.00 | 1 |  |
| ;     |                  |      |   |  |
| 25457 | 200.448684692383 | 0.00 | 1 |  |
| ;     |                  |      |   |  |
| 25458 | 200.234878540039 | 0.00 | 1 |  |
| ;     |                  |      |   |  |
| 25459 | 200.291046142578 | 0.00 | 1 |  |
| ;     |                  |      |   |  |
| 25460 | 198.842575073242 | 0.00 | 1 |  |
| ;     |                  |      |   |  |
| 25461 | 199.742294311523 | 0.00 | 1 |  |
| ;     |                  |      |   |  |
| 25462 | 199.918197631836 | 0.00 | 1 |  |
| ;     |                  |      |   |  |
| 25463 | 197.943237304688 | 0.00 | 1 |  |
| ;     |                  |      |   |  |
| 25464 | 193.111511230469 | 0.00 | 1 |  |
| ;     |                  |      |   |  |
| 25465 | 192.145309448242 | 0.00 | 1 |  |
| ;     |                  |      |   |  |
| 25466 | 194.278182983398 | 0.00 | 1 |  |
| ;     |                  |      |   |  |
| 25467 | 199.227111816406 | 0.00 | 1 |  |
| ;     |                  |      |   |  |
| 25468 | 198.916366577148 | 0.00 | 1 |  |
| ;     |                  |      |   |  |
| 25469 | 199.022369384766 | 0.00 | 1 |  |
| ;     |                  |      |   |  |
| 25470 | 198.953048706055 | 0.00 | 1 |  |
| ;     |                  |      |   |  |
| 25471 | 199.445663452148 | 0.00 | 1 |  |
| ;     |                  |      |   |  |
| 25472 | 198.956298828125 | 0.00 | 1 |  |
| ;     |                  |      |   |  |
| 25473 | 204.371948242188 | 0.00 | 1 |  |
| ;     |                  |      |   |  |
| 25474 | 204.086074829102 | 0.00 | 1 |  |
| ;     |                  |      |   |  |
| 25475 | 205.18132019043  | 0.00 | 1 |  |
| 25476 | 204.061187744141 | 0.00 | 1 |  |
| ;     |                  |      |   |  |
| 25477 | 205.789657592773 | 0.00 | 1 |  |
| ;     |                  |      |   |  |
| 25478 | 205.297668457031 | 0.00 | 1 |  |
| ;     |                  |      |   |  |
| 25479 | 201.722915649414 | 0.00 | 1 |  |
| ;     |                  |      |   |  |
| 25480 | 201.174819946289 | 0.00 | 1 |  |
| ;     |                  |      |   |  |
| 25481 | 191.371994018555 | 0.00 | 1 |  |

|       |                      |      |   |   |
|-------|----------------------|------|---|---|
| ;     |                      |      |   |   |
| 25482 | 204.122161865234     | 0.00 | 1 |   |
| ;     |                      |      |   |   |
| 25483 | 203.360321044922     | 0.00 | 1 |   |
| ;     |                      |      |   |   |
| 25484 | 203.38688659668 0.00 |      | 1 | ; |
| 25485 | 203.454345703125     | 0.00 | 1 |   |
| ;     |                      |      |   |   |
| 25486 | 202.126159667969     | 0.00 | 1 |   |
| ;     |                      |      |   |   |
| 25487 | 202.168930053711     | 0.00 | 1 |   |
| ;     |                      |      |   |   |
| 25488 | 202.927978515625     | 0.00 | 1 |   |
| ;     |                      |      |   |   |
| 25489 | 202.249206542969     | 0.00 | 1 |   |
| ;     |                      |      |   |   |
| 25490 | 201.707611083984     | 0.00 | 1 |   |
| ;     |                      |      |   |   |
| 25491 | 201.893890380859     | 0.00 | 1 |   |
| ;     |                      |      |   |   |
| 25492 | 200.829864501953     | 0.00 | 1 |   |
| ;     |                      |      |   |   |
| 25493 | 201.45524597168 0.00 |      | 1 | ; |
| 25494 | 203.274261474609     | 0.00 | 1 |   |
| ;     |                      |      |   |   |
| 25495 | 201.509323120117     | 0.00 | 1 |   |
| ;     |                      |      |   |   |
| 25496 | 201.072174072266     | 0.00 | 1 |   |
| ;     |                      |      |   |   |
| 25497 | 204.282989501953     | 0.00 | 1 |   |
| ;     |                      |      |   |   |
| 25498 | 204.550674438477     | 0.00 | 1 |   |
| ;     |                      |      |   |   |
| 25499 | 203.381042480469     | 0.00 | 1 |   |
| ;     |                      |      |   |   |
| 25500 | 202.331451416016     | 0.00 | 1 |   |
| ;     |                      |      |   |   |
| 25501 | 203.926132202148     | 0.00 | 1 |   |
| ;     |                      |      |   |   |
| 25502 | 203.443252563477     | 0.00 | 1 |   |
| ;     |                      |      |   |   |
| 25503 | 202.843460083008     | 0.00 | 1 |   |
| ;     |                      |      |   |   |
| 25504 | 202.631378173828     | 0.00 | 1 |   |
| ;     |                      |      |   |   |
| 25505 | 201.794982910156     | 0.00 | 1 |   |
| ;     |                      |      |   |   |
| 25506 | 201.961532592773     | 0.00 | 1 |   |
| ;     |                      |      |   |   |
| 25507 | 202.446838378906     | 0.00 | 1 |   |

|       |                  |      |   |   |   |
|-------|------------------|------|---|---|---|
| ;     |                  |      |   |   |   |
| 25508 | 201.503219604492 | 0.00 |   | 1 |   |
| ;     |                  |      |   |   |   |
| 25509 | 201.864212036133 | 0.00 |   | 1 |   |
| ;     |                  |      |   |   |   |
| 25510 | 202.69303894043  | 0.01 | 1 |   | ; |
| 25511 | 201.239151000977 | 0.00 |   | 1 |   |
| ;     |                  |      |   |   |   |
| 25512 | 200.151000976563 | 0.00 |   | 1 |   |
| ;     |                  |      |   |   |   |
| 25513 | 201.275650024414 | 0.00 |   | 1 |   |
| ;     |                  |      |   |   |   |
| 25514 | 200.20329284668  | 0.00 | 1 |   | ; |
| 25515 | 201.591888427734 | 0.01 |   | 1 |   |
| ;     |                  |      |   |   |   |
| 25516 | 200              | 0.00 | 1 |   | ; |
| 25517 | 200              | 0.00 | 1 |   | ; |
| 25518 | 201.335952758789 | 0.00 |   | 1 |   |
| ;     |                  |      |   |   |   |
| 25519 | 200.400238037109 | 0.00 |   | 1 |   |
| ;     |                  |      |   |   |   |
| 25520 | 200              | 0.00 | 1 |   | ; |
| 25521 | 200              | 0.00 | 1 |   | ; |
| 25522 | 200              | 0.00 | 1 |   | ; |
| 25523 | 203.730606079102 | 0.00 |   | 1 |   |
| ;     |                  |      |   |   |   |
| 25524 | 204.436126708984 | 0.00 |   | 1 |   |
| ;     |                  |      |   |   |   |
| 25525 | 225              | 0.00 | 1 |   | ; |
| 25526 | 224.356994628906 | 0.00 |   | 1 |   |
| ;     |                  |      |   |   |   |
| 25527 | 200              | 0.00 | 1 |   | ; |
| 25528 | 200.99430847168  | 0.00 | 1 |   | ; |
| 25529 | 200.467041015625 | 0.00 |   | 1 |   |
| ;     |                  |      |   |   |   |
| 25530 | 202.435165405273 | 0.00 |   | 1 |   |
| ;     |                  |      |   |   |   |
| 25531 | 201.490325927734 | 0.00 |   | 1 |   |
| ;     |                  |      |   |   |   |
| 25532 | 200.173294067383 | 0.00 |   | 1 |   |
| ;     |                  |      |   |   |   |
| 25533 | 201.130889892578 | 0.00 |   | 1 |   |
| ;     |                  |      |   |   |   |
| 25534 | 200              | 0.00 | 1 |   | ; |
| 25535 | 201.118087768555 | 0.00 |   | 1 |   |
| ;     |                  |      |   |   |   |
| 25536 | 200.355087280273 | 0.00 |   | 1 |   |
| ;     |                  |      |   |   |   |
| 25537 | 209.359283447266 | 0.00 |   | 1 |   |
| ;     |                  |      |   |   |   |

|       |                  |      |   |   |  |  |
|-------|------------------|------|---|---|--|--|
| 25538 | 214.66862487793  | 0.00 | 1 |   |  |  |
| 25539 | 213.136779785156 | 0.00 |   | 1 |  |  |
| ;     |                  |      |   |   |  |  |
| 25540 | 213.833343505859 | 0.01 |   | 1 |  |  |
| ;     |                  |      |   |   |  |  |
| 25541 | 212.248123168945 | 0.00 |   | 1 |  |  |
| ;     |                  |      |   |   |  |  |
| 25542 | 210.592163085938 | 0.00 |   | 1 |  |  |
| ;     |                  |      |   |   |  |  |
| 25543 | 210.754837036133 | 0.00 |   | 1 |  |  |
| ;     |                  |      |   |   |  |  |
| 25544 | 210.73942565918  | 0.00 | 1 |   |  |  |
| 25545 | 210.371673583984 | 0.00 |   | 1 |  |  |
| ;     |                  |      |   |   |  |  |
| 25546 | 210.285705566406 | 0.00 |   | 1 |  |  |
| ;     |                  |      |   |   |  |  |
| 25547 | 210.041275024414 | 0.00 |   | 1 |  |  |
| ;     |                  |      |   |   |  |  |
| 25548 | 211.40998840332  | 0.00 | 1 |   |  |  |
| 25549 | 211.951873779297 | 0.00 |   | 1 |  |  |
| ;     |                  |      |   |   |  |  |
| 25550 | 210.916748046875 | 0.00 |   | 1 |  |  |
| ;     |                  |      |   |   |  |  |
| 25551 | 210.249313354492 | 0.00 |   | 1 |  |  |
| ;     |                  |      |   |   |  |  |
| 25552 | 209.375747680664 | 0.00 |   | 1 |  |  |
| ;     |                  |      |   |   |  |  |
| 25553 | 209.312210083008 | 0.00 |   | 1 |  |  |
| ;     |                  |      |   |   |  |  |
| 25554 | 211.010452270508 | 0.00 |   | 1 |  |  |
| ;     |                  |      |   |   |  |  |
| 25555 | 212.684814453125 | 0.00 |   | 1 |  |  |
| ;     |                  |      |   |   |  |  |
| 25556 | 213.301574707031 | 0.02 |   | 1 |  |  |
| ;     |                  |      |   |   |  |  |
| 25557 | 219.610153198242 | 0.00 |   | 1 |  |  |
| ;     |                  |      |   |   |  |  |
| 25558 | 220.902755737305 | 0.00 |   | 1 |  |  |
| ;     |                  |      |   |   |  |  |
| 25559 | 220.555770874023 | 0.00 |   | 1 |  |  |
| ;     |                  |      |   |   |  |  |
| 25560 | 220.17741394043  | 0.00 | 1 |   |  |  |
| 25561 | 219.317398071289 | 0.00 |   | 1 |  |  |
| ;     |                  |      |   |   |  |  |
| 25562 | 220.472702026367 | 0.00 |   | 1 |  |  |
| ;     |                  |      |   |   |  |  |
| 25563 | 210              | 0.00 | 1 |   |  |  |
| 25564 | 210.69189453125  | 0.00 | 1 |   |  |  |
| 25565 | 209.509048461914 | 0.00 |   | 1 |  |  |
| ;     |                  |      |   |   |  |  |



|       |                  |      |   |   |
|-------|------------------|------|---|---|
| 25566 | 206.108673095703 | 0.00 | 1 |   |
| ;     |                  |      |   |   |
| 25567 | 205.401611328125 | 0.00 | 1 |   |
| ;     |                  |      |   |   |
| 25568 | 206.322525024414 | 0.00 | 1 |   |
| ;     |                  |      |   |   |
| 25569 | 207.602493286133 | 0.00 | 1 |   |
| ;     |                  |      |   |   |
| 25570 | 206.915374755859 | 0.00 | 1 |   |
| ;     |                  |      |   |   |
| 25571 | 206.65315246582  | 0.00 | 1 |   |
| 25572 | 208.061477661133 | 0.00 | 1 | ; |
| ;     |                  |      |   |   |
| 25573 | 196.327774047852 | 0.00 | 1 |   |
| ;     |                  |      |   |   |
| 25574 | 195.317932128906 | 0.00 | 1 |   |
| ;     |                  |      |   |   |
| 25575 | 195.435043334961 | 0.00 | 1 |   |
| ;     |                  |      |   |   |
| 25576 | 195.342666625977 | 0.00 | 1 |   |
| ;     |                  |      |   |   |
| 25577 | 194.378829956055 | 0.00 | 1 |   |
| ;     |                  |      |   |   |
| 25578 | 195.536727905273 | 0.00 | 1 |   |
| ;     |                  |      |   |   |
| 25579 | 192.465591430664 | 0.00 | 1 |   |
| ;     |                  |      |   |   |
| 25580 | 190.801513671875 | 0.00 | 1 |   |
| ;     |                  |      |   |   |
| 25581 | 195.772720336914 | 0.00 | 1 |   |
| ;     |                  |      |   |   |
| 25582 | 201.359893798828 | 0.00 | 1 |   |
| ;     |                  |      |   |   |
| 25583 | 207.071304321289 | 0.00 | 1 |   |
| ;     |                  |      |   |   |
| 25584 | 207.652969360352 | 0.00 | 1 |   |
| ;     |                  |      |   |   |
| 25585 | 209.425567626953 | 0.00 | 1 |   |
| ;     |                  |      |   |   |
| 25586 | 209.363098144531 | 0.00 | 1 |   |
| ;     |                  |      |   |   |
| 25587 | 204.08918762207  | 0.00 | 1 |   |
| 25588 | 205.932891845703 | 0.00 | 1 | ; |
| ;     |                  |      |   |   |
| 25589 | 205.472305297852 | 0.00 | 1 |   |
| ;     |                  |      |   |   |
| 25590 | 209.602325439453 | 0.00 | 1 |   |
| ;     |                  |      |   |   |
| 25591 | 212.048110961914 | 0.00 | 1 |   |
| ;     |                  |      |   |   |

|       |                  |      |   |   |
|-------|------------------|------|---|---|
| 25592 | 206.500411987305 | 0.00 | 1 |   |
| ;     |                  |      |   |   |
| 25593 | 205              | 0.00 | 1 | ; |
| 25594 | 205.158309936523 | 0.00 | 1 |   |
| ;     |                  |      |   |   |
| 25595 | 205              | 0.00 | 1 | ; |
| 25596 | 205              | 0.00 | 1 | ; |
| 25597 | 206.808181762695 | 0.00 | 1 |   |
| ;     |                  |      |   |   |
| 25598 | 206.225433349609 | 0.00 | 1 |   |
| ;     |                  |      |   |   |
| 25599 | 205.580383300781 | 0.00 | 1 |   |
| ;     |                  |      |   |   |
| 25600 | 205              | 0.00 | 1 | ; |
| 25601 | 205.835968017578 | 0.00 | 1 |   |
| ;     |                  |      |   |   |
| 25602 | 204.677368164063 | 0.00 | 1 |   |
| ;     |                  |      |   |   |
| 25603 | 204.328842163086 | 0.00 | 1 |   |
| ;     |                  |      |   |   |
| 25604 | 205              | 0.00 | 1 | ; |
| 25605 | 204.966323852539 | 0.00 | 1 |   |
| ;     |                  |      |   |   |
| 25606 | 203.931594848633 | 0.00 | 1 |   |
| ;     |                  |      |   |   |
| 25607 | 204.923965454102 | 0.00 | 1 |   |
| ;     |                  |      |   |   |
| 25608 | 202.745498657227 | 0.00 | 1 |   |
| ;     |                  |      |   |   |
| 25609 | 202.390274047852 | 0.00 | 1 |   |
| ;     |                  |      |   |   |
| 25610 | 203.599349975586 | 0.00 | 1 |   |
| ;     |                  |      |   |   |
| 25611 | 203.658355712891 | 0.64 | 1 |   |
| ;     |                  |      |   |   |
| 25612 | 235.315383911133 | 0.00 | 1 |   |
| ;     |                  |      |   |   |
| 25613 | 235.921340942383 | 0.00 | 1 |   |
| ;     |                  |      |   |   |
| 25614 | 231.376159667969 | 0.00 | 1 |   |
| ;     |                  |      |   |   |
| 25615 | 208.043930053711 | 0.00 | 1 |   |
| ;     |                  |      |   |   |
| 25616 | 218.447692871094 | 0.00 | 1 |   |
| ;     |                  |      |   |   |
| 25617 | 215.696533203125 | 0.00 | 1 |   |
| ;     |                  |      |   |   |
| 25618 | 216.558837890625 | 0.00 | 1 |   |
| ;     |                  |      |   |   |
| 25619 | 215.592437744141 | 0.00 | 1 |   |

|       |                  |      |   |   |   |
|-------|------------------|------|---|---|---|
| ;     |                  |      |   |   |   |
| 25620 | 215.879364013672 | 0.00 |   | 1 |   |
| ;     |                  |      |   |   |   |
| 25621 | 214.600555419922 | 0.00 |   | 1 |   |
| ;     |                  |      |   |   |   |
| 25622 | 212.534301757813 | 0.00 |   | 1 |   |
| ;     |                  |      |   |   |   |
| 25623 | 211.459365844727 | 0.00 |   | 1 |   |
| ;     |                  |      |   |   |   |
| 25624 | 211.463272094727 | 0.00 |   | 1 |   |
| ;     |                  |      |   |   |   |
| 25625 | 211.643646240234 | 0.00 |   | 1 |   |
| ;     |                  |      |   |   |   |
| 25626 | 210.171661376953 | 0.00 |   | 1 |   |
| ;     |                  |      |   |   |   |
| 25627 | 205              | 0.00 | 1 |   | ; |
| 25628 | 211.69416809082  | 0.00 | 1 |   | ; |
| 25629 | 209.200820922852 | 0.00 |   | 1 |   |
| ;     |                  |      |   |   |   |
| 25630 | 214.662490844727 | 0.01 |   | 1 |   |
| ;     |                  |      |   |   |   |
| 25631 | 217.465072631836 | 0.00 |   | 1 |   |
| ;     |                  |      |   |   |   |
| 25632 | 213.833404541016 | 0.00 |   | 1 |   |
| ;     |                  |      |   |   |   |
| 25633 | 217.431549072266 | 0.00 |   | 1 |   |
| ;     |                  |      |   |   |   |
| 25634 | 199.215972900391 | 0.00 |   | 1 |   |
| ;     |                  |      |   |   |   |
| 25635 | 199.068939208984 | 0.00 |   | 1 |   |
| ;     |                  |      |   |   |   |
| 25636 | 199.066696166992 | 0.00 |   | 1 |   |
| ;     |                  |      |   |   |   |
| 25637 | 196.82356262207  | 0.00 | 1 |   | ; |
| 25638 | 197.384918212891 | 0.00 |   | 1 |   |
| ;     |                  |      |   |   |   |
| 25639 | 197.293594360352 | 0.00 |   | 1 |   |
| ;     |                  |      |   |   |   |
| 25640 | 197.048049926758 | 0.00 |   | 1 |   |
| ;     |                  |      |   |   |   |
| 25641 | 198.619140625    | 0.00 | 1 |   | ; |
| 25642 | 196.234420776367 | 0.00 |   | 1 |   |
| ;     |                  |      |   |   |   |
| 25643 | 196.805786132813 | 0.00 |   | 1 |   |
| ;     |                  |      |   |   |   |
| 25644 | 194.532684326172 | 0.00 |   | 1 |   |
| ;     |                  |      |   |   |   |
| 25645 | 194.386337280273 | 0.00 |   | 1 |   |
| ;     |                  |      |   |   |   |
| 25646 | 196.293411254883 | 0.00 |   | 1 |   |

|       |                  |      |   |   |   |
|-------|------------------|------|---|---|---|
| ;     |                  |      |   |   |   |
| 25647 | 197.771911621094 | 0.00 |   | 1 |   |
| ;     |                  |      |   |   |   |
| 25648 | 195.46484375     | 0.00 | 1 |   | ; |
| 25649 | 195.239349365234 | 0.00 |   | 1 |   |
| ;     |                  |      |   |   |   |
| 25650 | 207.511764526367 | 0.00 |   | 1 |   |
| ;     |                  |      |   |   |   |
| 25651 | 207.504348754883 | 0.00 |   | 1 |   |
| ;     |                  |      |   |   |   |
| 25652 | 206.764404296875 | 0.00 |   | 1 |   |
| ;     |                  |      |   |   |   |
| 25653 | 204.932723999023 | 0.00 |   | 1 |   |
| ;     |                  |      |   |   |   |
| 25654 | 209.173294067383 | 0.00 |   | 1 |   |
| ;     |                  |      |   |   |   |
| 25655 | 208.84294128418  | 0.00 | 1 |   | ; |
| 25656 | 217.404815673828 | 0.00 |   | 1 |   |
| ;     |                  |      |   |   |   |
| 25657 | 218.057754516602 | 0.00 |   | 1 |   |
| ;     |                  |      |   |   |   |
| 25658 | 218.337768554687 | 0.00 |   | 1 |   |
| ;     |                  |      |   |   |   |
| 25659 | 216.396621704102 | 0.00 |   | 1 |   |
| ;     |                  |      |   |   |   |
| 25660 | 216.087463378906 | 0.00 |   | 1 |   |
| ;     |                  |      |   |   |   |
| 25661 | 214.777191162109 | 0.00 |   | 1 |   |
| ;     |                  |      |   |   |   |
| 25662 | 214.281433105469 | 0.00 |   | 1 |   |
| ;     |                  |      |   |   |   |
| 25663 | 212.347137451172 | 0.00 |   | 1 |   |
| ;     |                  |      |   |   |   |
| 25664 | 213.142852783203 | 0.00 |   | 1 |   |
| ;     |                  |      |   |   |   |
| 25665 | 210.180358886719 | 0.00 |   | 1 |   |
| ;     |                  |      |   |   |   |
| 25666 | 210.237197875977 | 0.00 |   | 1 |   |
| ;     |                  |      |   |   |   |
| 25667 | 211.669662475586 | 0.00 |   | 1 |   |
| ;     |                  |      |   |   |   |
| 25668 | 209.212188720703 | 0.00 |   | 1 |   |
| ;     |                  |      |   |   |   |
| 25669 | 210.538757324219 | 0.00 |   | 1 |   |
| ;     |                  |      |   |   |   |
| 25670 | 210.00163269043  | 0.00 | 1 |   | ; |
| 25671 | 198.735626220703 | 0.00 |   | 1 |   |
| ;     |                  |      |   |   |   |
| 25672 | 195.866958618164 | 0.03 |   | 1 |   |
| ;     |                  |      |   |   |   |

|       |                  |      |   |   |
|-------|------------------|------|---|---|
| 25673 | 200.507080078125 | 0.03 | 1 |   |
| ;     |                  |      |   |   |
| 25674 | 198.361801147461 | 0.02 | 1 |   |
| ;     |                  |      |   |   |
| 25675 | 197.032653808594 | 0.00 | 1 |   |
| ;     |                  |      |   |   |
| 25676 | 220.519989013672 | 0.01 | 1 |   |
| ;     |                  |      |   |   |
| 25677 | 217.722549438477 | 0.01 | 1 |   |
| ;     |                  |      |   |   |
| 25678 | 199.423690795898 | 0.00 | 1 |   |
| ;     |                  |      |   |   |
| 25679 | 205              | 0.02 | 1 | ; |
| 25680 | 219.815383911133 | 0.02 | 1 |   |
| ;     |                  |      |   |   |
| 25681 | 221.991287231445 | 0.01 | 1 |   |
| ;     |                  |      |   |   |
| 25682 | 218.503997802734 | 0.00 | 1 |   |
| ;     |                  |      |   |   |
| 25683 | 203.522109985352 | 0.02 | 1 |   |
| ;     |                  |      |   |   |
| 25684 | 209.387710571289 | 0.05 | 1 |   |
| ;     |                  |      |   |   |
| 25685 | 205              | 0.01 | 1 | ; |
| 25686 | 212.81120300293  | 0.00 | 1 | ; |
| 25687 | 196.688888549805 | 0.05 | 1 |   |
| ;     |                  |      |   |   |
| 25688 | 197.951553344727 | 0.03 | 1 |   |
| ;     |                  |      |   |   |
| 25689 | 197.544204711914 | 0.00 | 1 |   |
| ;     |                  |      |   |   |
| 25690 | 198.372161865234 | 0.00 | 1 |   |
| ;     |                  |      |   |   |
| 25691 | 196.655303955078 | 0.02 | 1 |   |
| ;     |                  |      |   |   |
| 25692 | 240              | 0.01 | 1 | ; |
| 25693 | 240.045928955078 | 0.01 | 1 |   |
| ;     |                  |      |   |   |
| 25694 | 198.621246337891 | 0.00 | 1 |   |
| ;     |                  |      |   |   |
| 25695 | 204.433166503906 | 0.03 | 1 |   |
| ;     |                  |      |   |   |
| 25696 | 219.277908325195 | 0.00 | 1 |   |
| ;     |                  |      |   |   |
| 25697 | 218.053619384766 | 0.30 | 1 |   |
| ;     |                  |      |   |   |
| 25698 | 219.282653808594 | 0.00 | 1 |   |
| ;     |                  |      |   |   |
| 25699 | 218.693222045898 | 0.00 | 1 |   |
| ;     |                  |      |   |   |

|       |                  |      |   |   |
|-------|------------------|------|---|---|
| 25700 | 196.635009765625 | 0.00 | 1 |   |
| ;     |                  |      |   |   |
| 25701 | 199.376571655273 | 0.00 | 1 |   |
| ;     |                  |      |   |   |
| 25702 | 198.031951904297 | 0.00 | 1 |   |
| ;     |                  |      |   |   |
| 25703 | 201.562515258789 | 0.01 | 1 |   |
| ;     |                  |      |   |   |
| 25704 | 209.75           | 0.00 | 1 | ; |
| 25705 | 209.75           | 0.00 | 1 | ; |
| 25706 | 211.804763793945 | 0.00 | 1 |   |
| ;     |                  |      |   |   |
| 25707 | 205.742691040039 | 0.01 | 1 |   |
| ;     |                  |      |   |   |
| 25708 | 208.135055541992 | 0.02 | 1 |   |
| ;     |                  |      |   |   |
| 25709 | 239.993698120117 | 0.00 | 1 |   |
| ;     |                  |      |   |   |
| 25710 | 239.747909545898 | 0.00 | 1 |   |
| ;     |                  |      |   |   |
| 35582 | 217.408737182617 | 0.01 | 1 |   |
| ;     |                  |      |   |   |
| 35584 | 217.416015625    | 0.03 | 1 | ; |
| 35586 | 217.034744262695 | 0.03 | 1 |   |
| ;     |                  |      |   |   |
| 35588 | 216.944885253906 | 0.02 | 1 |   |
| ;     |                  |      |   |   |
| 35591 | 218.153732299805 | 0.01 | 1 |   |
| ;     |                  |      |   |   |
| 35593 | 218.159423828125 | 0.01 | 1 |   |
| ;     |                  |      |   |   |
| 35595 | 217.704956054688 | 0.04 | 1 |   |
| ;     |                  |      |   |   |
| 35597 | 217.702301025391 | 0.02 | 1 |   |
| ;     |                  |      |   |   |
| 35602 | 217.440643310547 | 0.04 | 1 |   |
| ;     |                  |      |   |   |
| 35604 | 216.700698852539 | 0.05 | 1 |   |
| ;     |                  |      |   |   |
| 35606 | 216.197448730469 | 0.04 | 1 |   |
| ;     |                  |      |   |   |
| 35608 | 216.796615600586 | 0.05 | 1 |   |
| ;     |                  |      |   |   |
| 35610 | 216.337936401367 | 0.03 | 1 |   |
| ;     |                  |      |   |   |
| 35612 | 215.835754394531 | 0.01 | 1 |   |
| ;     |                  |      |   |   |
| 35614 | 215.261184692383 | 0.01 | 1 |   |
| ;     |                  |      |   |   |
| 35616 | 215.760238647461 | 0.01 | 1 |   |

|       |                  |      |   |   |   |
|-------|------------------|------|---|---|---|
| ;     |                  |      |   |   |   |
| 35620 | 215.207733154297 | 0.00 |   | 1 |   |
| ;     |                  |      |   |   |   |
| 35622 | 215.175628662109 | 0.01 |   | 1 |   |
| ;     |                  |      |   |   |   |
| 35624 | 215.114028930664 | 0.00 |   | 1 |   |
| ;     |                  |      |   |   |   |
| 35628 | 210.6455078125   | 0.00 | 1 |   | ; |
| 35629 | 210.249053955078 | 0.00 |   | 1 |   |
| ;     |                  |      |   |   |   |
| 35637 | 226.974029541016 | 0.00 |   | 1 |   |
| ;     |                  |      |   |   |   |
| 35655 | 226.924362182617 | 0.00 |   | 1 |   |
| ;     |                  |      |   |   |   |
| 35657 | 226.953964233398 | 0.00 |   | 1 |   |
| ;     |                  |      |   |   |   |
| 35661 | 226.68522644043  | 0.00 | 1 |   | ; |
| 35662 | 226.598678588867 | 0.00 |   | 1 |   |
| ;     |                  |      |   |   |   |
| 35664 | 226.825546264648 | 0.00 |   | 1 |   |
| ;     |                  |      |   |   |   |
| 35666 | 227.362213134766 | 0.00 |   | 1 |   |
| ;     |                  |      |   |   |   |
| 35668 | 225.717697143555 | 0.00 |   | 1 |   |
| ;     |                  |      |   |   |   |
| 35671 | 225.804260253906 | 0.00 |   | 1 |   |
| ;     |                  |      |   |   |   |
| 35673 | 225.632949829102 | 0.00 |   | 1 |   |
| ;     |                  |      |   |   |   |
| 35676 | 220.607803344727 | 0.02 |   | 1 |   |
| ;     |                  |      |   |   |   |
| 35678 | 221.039260864258 | 0.02 |   | 1 |   |
| ;     |                  |      |   |   |   |
| 35680 | 221.433990478516 | 0.00 |   | 1 |   |
| ;     |                  |      |   |   |   |
| 35682 | 221.986206054688 | 0.00 |   | 1 |   |
| ;     |                  |      |   |   |   |
| 35684 | 222.320617675781 | 0.00 |   | 1 |   |
| ;     |                  |      |   |   |   |
| 35686 | 222.659545898438 | 0.00 |   | 1 |   |
| ;     |                  |      |   |   |   |
| 35688 | 223.045715332031 | 0.00 |   | 1 |   |
| ;     |                  |      |   |   |   |
| 35690 | 224.338714599609 | 0.00 |   | 1 |   |
| ;     |                  |      |   |   |   |
| 35692 | 224.543823242188 | 0.00 |   | 1 |   |
| ;     |                  |      |   |   |   |
| 35694 | 224.032104492188 | 0.00 |   | 1 |   |
| ;     |                  |      |   |   |   |
| 35696 | 223.632873535156 | 0.00 |   | 1 |   |

|       |                  |      |   |  |   |
|-------|------------------|------|---|--|---|
| ;     |                  |      |   |  |   |
| 35698 | 223.295776367188 | 0.00 | 1 |  |   |
| ;     |                  |      |   |  |   |
| 35700 | 222.872375488281 | 0.00 | 1 |  |   |
| ;     |                  |      |   |  |   |
| 35702 | 222.450302124023 | 0.02 | 1 |  |   |
| ;     |                  |      |   |  |   |
| 35704 | 222.005569458008 | 0.05 | 1 |  |   |
| ;     |                  |      |   |  |   |
| 35712 | 220.159332275391 | 0.02 | 1 |  |   |
| ;     |                  |      |   |  |   |
| 35714 | 219.859451293945 | 0.03 | 1 |  |   |
| ;     |                  |      |   |  |   |
| 35716 | 220.882843017578 | 0.03 | 1 |  |   |
| ;     |                  |      |   |  |   |
| 35718 | 221.488128662109 | 0.03 | 1 |  |   |
| ;     |                  |      |   |  |   |
| 35721 | 221.953231811523 | 0.00 | 1 |  |   |
| ;     |                  |      |   |  |   |
| 35724 | 221.456100463867 | 0.04 | 1 |  |   |
| ;     |                  |      |   |  |   |
| 35726 | 221.554458618164 | 0.01 | 1 |  |   |
| ;     |                  |      |   |  |   |
| 35728 | 220.636260986328 | 0.00 | 1 |  |   |
| ;     |                  |      |   |  |   |
| 35730 | 221.493621826172 | 0.01 | 1 |  |   |
| ;     |                  |      |   |  |   |
| 35732 | 221.4677734375   | 0.00 | 1 |  | ; |
| 35734 | 232.817596435547 | 0.00 | 1 |  |   |
| ;     |                  |      |   |  |   |
| 35737 | 232.939056396484 | 0.00 | 1 |  |   |
| ;     |                  |      |   |  |   |
| 35745 | 228.155670166016 | 0.00 | 1 |  |   |
| ;     |                  |      |   |  |   |
| 35748 | 227.798141479492 | 0.00 | 1 |  |   |
| ;     |                  |      |   |  |   |
| 35750 | 228.17741394043  | 0.00 | 1 |  | ; |
| 35753 | 227.985733032227 | 0.00 | 1 |  |   |
| ;     |                  |      |   |  |   |
| 35755 | 200.391616821289 | 0.00 | 1 |  |   |
| ;     |                  |      |   |  |   |
| 35757 | 200.324615478516 | 0.00 | 1 |  |   |
| ;     |                  |      |   |  |   |
| 35780 | 202.13           | 0.00 | 1 |  | ; |
| 35849 | 209              | 0.00 | 1 |  | ; |
| 35852 | 212              | 0.00 | 1 |  | ; |
| 35854 | 212              | 0.00 | 1 |  | ; |
| 35858 | 216              | 0.00 | 1 |  | ; |
| 35860 | 227              | 0.00 | 1 |  | ; |
| 35864 | 223.5            | 0.00 | 1 |  | ; |



|       |                  |      |   |   |   |
|-------|------------------|------|---|---|---|
| 35868 | 226              | 0.00 | 1 |   | ; |
| 35871 | 237              | 0.00 | 1 |   | ; |
| 35874 | 218              | 0.00 | 1 |   | ; |
| 35877 | 221              | 0.00 | 1 |   | ; |
| 35880 | 198              | 0.00 | 1 |   | ; |
| 35883 | 194              | 0.00 | 1 |   | ; |
| 35937 | 201.993261847083 | 0.00 |   | 1 |   |
| ;     |                  |      |   |   |   |
| 35987 | 202              | 0.00 | 1 |   | ; |
| 36755 | 203.797404731222 | 0.00 |   | 1 |   |
| ;     |                  |      |   |   |   |
| 36758 | 204.148081513465 | 0.00 |   | 1 |   |
| ;     |                  |      |   |   |   |
| 36764 | 238.859862032688 | 0.00 |   | 1 |   |
| ;     |                  |      |   |   |   |
| 36773 | 219.7            | 0.96 | 1 |   | ; |
| 36775 | 220.436629824115 | 0.00 |   | 1 |   |
| ;     |                  |      |   |   |   |
| 36778 | 220              | 0.00 | 1 |   | ; |
| 36782 | 220              | 0.00 | 1 |   | ; |
| 36784 | 220              | 0.00 | 1 |   | ; |
| 36801 | 221.280653951601 | 0.00 |   | 1 |   |
| ;     |                  |      |   |   |   |
| 36804 | 210.932605035949 | 0.00 |   | 1 |   |
| ;     |                  |      |   |   |   |
| 36807 | 213.130654701456 | 0.00 |   | 1 |   |
| ;     |                  |      |   |   |   |
| 36811 | 211.14325450106  | 0.00 | 1 |   | ; |
| 36814 | 205.869305441608 | 0.00 |   | 1 |   |
| ;     |                  |      |   |   |   |
| 36817 | 205.852481363052 | 0.00 |   | 1 |   |
| ;     |                  |      |   |   |   |
| 36820 | 234.24881327303  | 0.00 | 1 |   | ; |
| 36823 | 237.166560144647 | 0.00 |   | 1 |   |
| ;     |                  |      |   |   |   |
| 36826 | 237.12822530901  | 0.00 | 1 |   | ; |
| 36829 | 235.547735965125 | 0.00 |   | 1 |   |
| ;     |                  |      |   |   |   |
| 36832 | 235.535834448127 | 0.00 |   | 1 |   |
| ;     |                  |      |   |   |   |
| 36835 | 214.542029330376 | 0.00 |   | 1 |   |
| ;     |                  |      |   |   |   |
| 36838 | 212.806784457712 | 0.00 |   | 1 |   |
| ;     |                  |      |   |   |   |
| 36841 | 212.731860427282 | 0.00 |   | 1 |   |
| ;     |                  |      |   |   |   |
| 36844 | 209.85752299835  | 0.00 | 1 |   | ; |
| 36847 | 209.80019234173  | 0.00 | 1 |   | ; |
| 36850 | 200.18065576629  | 0.00 | 1 |   | ; |
| 36853 | 200.02725799081  | 0.00 | 1 |   | ; |

|         |                  |      |   |   |
|---------|------------------|------|---|---|
| 36856   | 211.820835093723 | 0.00 | 1 |   |
| ;       |                  |      |   |   |
| 36859   | 212.117879422565 | 0.00 | 1 |   |
| ;       |                  |      |   |   |
| 36862   | 212.547464595487 | 0.00 | 1 |   |
| ;       |                  |      |   |   |
| 36865   | 209.918862696112 | 0.00 | 1 |   |
| ;       |                  |      |   |   |
| 36868   | 208.620828309106 | 0.00 | 1 |   |
| ;       |                  |      |   |   |
| 36871   | 221.810068347242 | 0.00 | 1 |   |
| ;       |                  |      |   |   |
| 36874   | 215.140692784466 | 0.00 | 1 |   |
| ;       |                  |      |   |   |
| 36877   | 201.909012791175 | 0.00 | 1 |   |
| ;       |                  |      |   |   |
| 35478-B | 214.22           | 0.00 | 1 | ; |
| 35481-B | 214.19           | 0.00 | 1 | ; |
| 35487-B | 230              | 0.00 | 1 | ; |
| 35490-B | 230              | 0.00 | 1 | ; |
| 35496-B | 204.33           | 0.00 | 1 | ; |
| PS2     | 241.91           | -1   | 3 | ; |
| PS3     | 202.584          | -1   | 3 | ; |

#### [RESERVOIRS]

|     |                  |         |   |
|-----|------------------|---------|---|
| ;ID | Head             | Pattern |   |
| PS1 | 244.528930664063 |         | ; |

#### [TANKS]

| ;ID      | Elevation | InitLevel | MinLevel | MaxLevel |
|----------|-----------|-----------|----------|----------|
| Diameter | MinVol    | VolCurve  |          |          |

#### [PIPES]

| ;ID              | Node1     | Node2  | Length |
|------------------|-----------|--------|--------|
| Diameter         | Roughness | Status |        |
| 25718            | 24951     | 25456  |        |
| 1.99993880817442 | 100       | 150    | Open ; |
| 25719            | 21277     | 25406  |        |
| 2.63393815944138 | 100       | 150    | Open ; |
| 25720            | 21061     | 25321  |        |
| 1.99991578979186 | 100       | 150    | Open ; |
| 25721            | 23575     | 25386  |        |
| 10.2581598359202 | 100       | 150    | Open ; |
| 25722            | 18779     | 25458  |        |
| 1.99994024810908 | 100       | 150    | Open ; |
| 25723            | 21300     | 25622  |        |
| 1.99994024857596 | 100       | 150    | Open ; |
| 25724            | 20618     | 25356  |        |
| 2.00003809477681 | 100       | 150    | Open ; |
| 25725            | 23157     | 25286  |        |

|                     |       |     |       |      |   |
|---------------------|-------|-----|-------|------|---|
| 1.99994140909604    | 100   | 150 | 0     | Open | ; |
| 25726               | 22934 |     | 25665 |      |   |
| 1.9999417693204 100 |       | 150 | 0     | Open | ; |
| 25727               | 21048 |     | 25215 |      |   |
| 1.99994297979028    | 100   | 150 | 0     | Open | ; |
| 25728               | 23890 |     | 25516 |      |   |
| 1.99995181229768    | 100   | 150 | 0     | Open | ; |
| 25729               | 23644 |     | 25213 |      |   |
| 1.99994385006928    | 100   | 150 | 0     | Open | ; |
| 25730               | 18689 |     | 25565 |      |   |
| 1.99994420024288    | 100   | 150 | 0     | Open | ; |
| 25731               | 21995 |     | 25470 |      |   |
| 2.00004446431752    | 100   | 150 | 0     | Open | ; |
| 25732               | 23546 |     | 25093 |      |   |
| 1.99994524951384    | 100   | 150 | 0     | Open | ; |
| 25733               | 23566 |     | 25186 |      |   |
| 1.99994632981525    | 100   | 150 | 0     | Open | ; |
| 25734               | 23447 |     | 25533 |      |   |
| 1.9999463684621 100 |       | 150 | 0     | Open | ; |
| 25735               | 23660 |     | 25594 |      |   |
| 1.99994641956913    | 100   | 150 | 0     | Open | ; |
| 25736               | 22249 |     | 25489 |      |   |
| 1.99994689817813    | 100   | 150 | 0     | Open | ; |
| 25737               | 21168 |     | 25194 |      |   |
| 1.99998181344873    | 100   | 150 | 0     | Open | ; |
| 25738               | 21936 |     | 25331 |      |   |
| 2.00002679291889    | 100   | 150 | 0     | Open | ; |
| 25739               | 20750 |     | 25278 |      |   |
| 2.00004065359084    | 100   | 150 | 0     | Open | ; |
| 25740               | 22870 |     | 25350 |      |   |
| 1.99997687153573    | 100   | 150 | 0     | Open | ; |
| 25741               | 19765 |     | 25189 |      |   |
| 1.9999489997713 100 |       | 150 | 0     | Open | ; |
| 25742               | 21793 |     | 25560 |      |   |
| 2.0000476950126 100 |       | 150 | 0     | Open | ; |
| 25743               | 22960 |     | 25165 |      |   |
| 1.99995676197605    | 100   | 150 | 0     | Open | ; |
| 25744               | 22874 |     | 25115 |      |   |
| 1.99996067276873    | 100   | 150 | 0     | Open | ; |
| 25745               | 22475 |     | 25100 |      |   |
| 2.00003876400662    | 100   | 150 | 0     | Open | ; |
| 25746               | 24435 |     | 25121 |      |   |
| 2.00000422355862    | 100   | 150 | 0     | Open | ; |
| 25747               | 21924 |     | 25637 |      |   |
| 9.64626615961861    | 100   | 150 | 0     | Open | ; |
| 25748               | 21967 |     | 25438 |      |   |
| 1.99995176872673    | 100   | 150 | 0     | Open | ; |
| 25749               | 18541 |     | 25607 |      |   |
| 1.99995757232125    | 100   | 150 | 0     | Open | ; |
| 25750               | 20964 |     | 25342 |      |   |

|                     |       |     |       |      |   |
|---------------------|-------|-----|-------|------|---|
| 1.99995320980404    | 100   | 150 | 0     | Open | ; |
| 25751               | 19785 |     | 25364 |      |   |
| 9.61924251783942    | 100   | 150 | 0     | Open | ; |
| 25752               | 20191 |     | 25430 |      |   |
| 9.83598590924773    | 100   | 150 | 0     | Open | ; |
| 25753               | 18554 |     | 25306 |      |   |
| 2.00005312428141    | 100   | 150 | 0     | Open | ; |
| 25754               | 20559 |     | 25090 |      |   |
| 2.0000449238624 100 |       | 150 | 0     | Open | ; |
| 25755               | 23557 |     | 25373 |      |   |
| 2.00005292327237    | 100   | 150 | 0     | Open | ; |
| 25756               | 21506 |     | 25266 |      |   |
| 2.00005406415367    | 100   | 150 | 0     | Open | ; |
| 25757               | 18585 |     | 25465 |      |   |
| 2.00000870366708    | 100   | 150 | 0     | Open | ; |
| 25758               | 23484 |     | 25595 |      |   |
| 1.99995636068325    | 100   | 150 | 0     | Open | ; |
| 25759               | 22027 |     | 25611 |      |   |
| 1.99994713146574    | 100   | 150 | 0     | Open | ; |
| 25760               | 23949 |     | 25561 |      |   |
| 1.99995701050672    | 100   | 150 | 0     | Open | ; |
| 25761               | 20413 |     | 25440 |      |   |
| 2.0000572637992 100 |       | 150 | 0     | Open | ; |
| 25762               | 24047 |     | 25282 |      |   |
| 2.00005706346812    | 100   | 150 | 0     | Open | ; |
| 25763               | 23886 |     | 25522 |      |   |
| 2.00005706473477    | 100   | 150 | 0     | Open | ; |
| 25764               | 19414 |     | 25579 |      |   |
| 1.99995812871225    | 100   | 150 | 0     | Open | ; |
| 25765               | 23539 |     | 25231 |      |   |
| 2.00004961395226    | 100   | 150 | 0     | Open | ; |
| 25766               | 23006 |     | 25409 |      |   |
| 2.90883263573875    | 100   | 150 | 0     | Open | ; |
| 25767               | 21907 |     | 25256 |      |   |
| 1.99995943988919    | 100   | 150 | 0     | Open | ; |
| 25768               | 19097 |     | 25502 |      |   |
| 2.00005912490502    | 100   | 150 | 0     | Open | ; |
| 25769               | 20901 |     | 25314 |      |   |
| 1.99995953791883    | 100   | 150 | 0     | Open | ; |
| 25770               | 19737 |     | 25104 |      |   |
| 2.00005805417272    | 100   | 150 | 0     | Open | ; |
| 25771               | 22472 |     | 25475 |      |   |
| 2.00005912436845    | 100   | 150 | 0     | Open | ; |
| 25772               | 23070 |     | 25209 |      |   |
| 2.00005954335147    | 100   | 150 | 0     | Open | ; |
| 25773               | 19398 |     | 25552 |      |   |
| 1.9999713121245 100 |       | 150 | 0     | Open | ; |
| 25774               | 22952 |     | 25661 |      |   |
| 1.99997608187466    | 100   | 150 | 0     | Open | ; |
| 25775               | 19391 |     | 25553 |      |   |

|                  |       |     |       |      |   |
|------------------|-------|-----|-------|------|---|
| 1.99996051992551 | 100   | 150 | 0     | Open | ; |
| 25776            | 22611 |     | 25597 |      |   |
| 2.00006021298484 | 100   | 150 | 0     | Open | ; |
| 25777            | 20139 |     | 25344 |      |   |
| 1.99996073918879 | 100   | 150 | 0     | Open | ; |
| 25778            | 24948 |     | 25416 |      |   |
| 1.99996097923197 | 100   | 150 | 0     | Open | ; |
| 25779            | 19723 |     | 25398 |      |   |
| 2.00005805397334 | 100   | 150 | 0     | Open | ; |
| 25780            | 21998 |     | 25645 |      |   |
| 1.99996136907657 | 100   | 150 | 0     | Open | ; |
| 25781            | 19530 |     | 25334 |      |   |
| 1.99999736318731 | 100   | 150 | 0     | Open | ; |
| 25782            | 20020 |     | 25554 |      |   |
| 2.00006162488421 | 100   | 150 | 0     | Open | ; |
| 25783            | 19295 |     | 25118 |      |   |
| 2.00006137579774 | 100   | 150 | 0     | Open | ; |
| 25784            | 23191 |     | 25343 |      |   |
| 1.99996212025241 | 100   | 150 | 0     | Open | ; |
| 25785            | 20922 |     | 25375 |      |   |
| 2.00006143427809 | 100   | 150 | 0     | Open | ; |
| 25786            | 19532 |     | 25354 |      |   |
| 2.00005987500488 | 100   | 150 | 0     | Open | ; |
| 25787            | 19467 |     | 25289 |      |   |
| 2.00000006162398 | 100   | 150 | 0     | Open | ; |
| 25788            | 19849 |     | 25642 |      |   |
| 1.99996345948503 | 100   | 150 | 0     | Open | ; |
| 25789            | 20546 |     | 25305 |      |   |
| 1.99996385009843 | 100   | 150 | 0     | Open | ; |
| 25790            | 23797 |     | 25181 |      |   |
| 1.99996396976675 | 100   | 150 | 0     | Open | ; |
| 25791            | 20980 |     | 25293 |      |   |
| 2.00006384496476 | 100   | 150 | 0     | Open | ; |
| 25792            | 22467 |     | 25368 |      |   |
| 1.99996508931454 | 100   | 150 | 0     | Open | ; |
| 25793            | 23439 |     | 25476 |      |   |
| 1.99996552950502 | 100   | 150 | 0     | Open | ; |
| 25794            | 19694 |     | 25640 |      |   |
| 1.99996021278806 | 100   | 150 | 0     | Open | ; |
| 25795            | 23026 |     | 25664 |      |   |
| 2.00006074315461 | 100   | 150 | 0     | Open | ; |
| 25796            | 23700 |     | 25177 |      |   |
| 10.9079846554825 | 100   | 150 | 0     | Open | ; |
| 25797            | 24864 |     | 25530 |      |   |
| 2.00006670418157 | 100   | 150 | 0     | Open | ; |
| 25798            | 23279 |     | 25495 |      |   |
| 11.2019639623541 | 100   | 150 | 0     | Open | ; |
| 25799            | 23818 |     | 25253 |      |   |
| 1.99996820908548 | 100   | 150 | 0     | Open | ; |
| 25800            | 22807 |     | 25439 |      |   |

|                     |       |     |       |      |   |
|---------------------|-------|-----|-------|------|---|
| 1.99996844865635    | 100   | 150 | 0     | Open | ; |
| 25801               | 20894 |     | 25268 |      |   |
| 1.99996867969284    | 100   | 150 | 0     | Open | ; |
| 25802               | 18518 |     | 25105 |      |   |
| 2.90772539280654    | 100   | 150 | 0     | Open | ; |
| 25803               | 18547 |     | 25604 |      |   |
| 2.00006857551316    | 100   | 150 | 0     | Open | ; |
| 25804               | 21814 |     | 25163 |      |   |
| 1.99996884042493    | 100   | 150 | 0     | Open | ; |
| 25805               | 24523 |     | 25686 |      |   |
| 2.00008180715216    | 100   | 150 | 0     | Open | ; |
| 25806               | 20187 |     | 25254 |      |   |
| 1.99996820997626    | 100   | 150 | 0     | Open | ; |
| 25807               | 22256 |     | 25322 |      |   |
| 1.99997044978997    | 100   | 150 | 0     | Open | ; |
| 25808               | 21152 |     | 25577 |      |   |
| 2.000019713765 100  |       | 150 | 0     | Open | ; |
| 25809               | 23449 |     | 25535 |      |   |
| 2.0000694237367 100 |       | 150 | 0     | Open | ; |
| 25810               | 19528 |     | 25509 |      |   |
| 1.99997778296027    | 100   | 150 | 0     | Open | ; |
| 25811               | 23095 |     | 25180 |      |   |
| 2.00005885394583    | 100   | 150 | 0     | Open | ; |
| 25812               | 18546 |     | 25605 |      |   |
| 1.99997821301499    | 100   | 150 | 0     | Open | ; |
| 25813               | 19485 |     | 25484 |      |   |
| 11.3035422251599    | 100   | 150 | 0     | Open | ; |
| 25814               | 22324 |     | 25235 |      |   |
| 2.00006231327829    | 100   | 150 | 0     | Open | ; |
| 25815               | 22698 |     | 25304 |      |   |
| 1.99997212995118    | 100   | 150 | 0     | Open | ; |
| 25816               | 22405 |     | 25335 |      |   |
| 2.00000566191356    | 100   | 150 | 0     | Open | ; |
| 25817               | 22142 |     | 25084 |      |   |
| 1.99997217964442    | 100   | 150 | 0     | Open | ; |
| 25818               | 18611 |     | 25578 |      |   |
| 1.99997233851222    | 100   | 150 | 0     | Open | ; |
| 25819               | 23910 |     | 25122 |      |   |
| 1.99997249997962    | 100   | 150 | 0     | Open | ; |
| 25820               | 21866 |     | 25319 |      |   |
| 1.99997160003396    | 100   | 150 | 0     | Open | ; |
| 25821               | 23559 |     | 25431 |      |   |
| 9.85529431473067    | 100   | 150 | 0     | Open | ; |
| 25822               | 18774 |     | 25265 |      |   |
| 9.61954698260361    | 100   | 150 | 0     | Open | ; |
| 25823               | 22058 |     | 25592 |      |   |
| 1.99997321846142    | 100   | 150 | 0     | Open | ; |
| 25824               | 21427 |     | 25190 |      |   |
| 2.00000917244934    | 100   | 150 | 0     | Open | ; |
| 25825               | 22946 |     | 25599 |      |   |

|                     |       |     |       |      |   |
|---------------------|-------|-----|-------|------|---|
| 1.99994822278875    | 100   | 150 | 0     | Open | ; |
| 25826               | 21489 |     | 25583 |      |   |
| 2.00007271428938    | 100   | 150 | 0     | Open | ; |
| 25827               | 19371 |     | 25376 |      |   |
| 1.99998067282329    | 100   | 150 | 0     | Open | ; |
| 25828               | 23087 |     | 25363 |      |   |
| 1.99997473907504    | 100   | 150 | 0     | Open | ; |
| 25829               | 23902 |     | 25110 |      |   |
| 9.6246569364674 100 |       | 150 | 0     | Open | ; |
| 25830               | 20324 |     | 25526 |      |   |
| 1.99997560926402    | 100   | 150 | 0     | Open | ; |
| 25831               | 20328 |     | 25525 |      |   |
| 1.9999756096474 100 |       | 150 | 0     | Open | ; |
| 25832               | 21308 |     | 25638 |      |   |
| 1.99997578053641    | 100   | 150 | 0     | Open | ; |
| 25833               | 25010 |     | 25610 |      |   |
| 2.00007547443045    | 100   | 150 | 0     | Open | ; |
| 25834               | 22383 |     | 25175 |      |   |
| 11.2942414496254    | 100   | 150 | 0     | Open | ; |
| 25835               | 21213 |     | 25644 |      |   |
| 1.99997673010211    | 100   | 150 | 0     | Open | ; |
| 25836               | 23586 |     | 25391 |      |   |
| 9.97704806521322    | 100   | 150 | 0     | Open | ; |
| 25837               | 22141 |     | 25378 |      |   |
| 1.99997844107768    | 100   | 150 | 0     | Open | ; |
| 25838               | 19505 |     | 25492 |      |   |
| 9.63243472278858    | 100   | 150 | 0     | Open | ; |
| 25839               | 23272 |     | 25547 |      |   |
| 2.00007796249439    | 100   | 150 | 0     | Open | ; |
| 25840               | 20616 |     | 25358 |      |   |
| 1.99997866025639    | 100   | 150 | 0     | Open | ; |
| 25841               | 23733 |     | 25656 |      |   |
| 1.9999788515532 100 |       | 150 | 0     | Open | ; |
| 25842               | 20204 |     | 25341 |      |   |
| 1.99997970009057    | 100   | 150 | 0     | Open | ; |
| 25843               | 24942 |     | 25473 |      |   |
| 2.00007890164392    | 100   | 150 | 0     | Open | ; |
| 25844               | 19831 |     | 25442 |      |   |
| 1.99997992964211    | 100   | 150 | 0     | Open | ; |
| 25845               | 23362 |     | 25404 |      |   |
| 2.63726307689774    | 100   | 150 | 0     | Open | ; |
| 25846               | 20661 |     | 25507 |      |   |
| 2.00008010307768    | 100   | 150 | 0     | Open | ; |
| 25847               | 21201 |     | 25379 |      |   |
| 1.99997040257484    | 100   | 150 | 0     | Open | ; |
| 25848               | 23393 |     | 25247 |      |   |
| 1.99998601256583    | 100   | 150 | 0     | Open | ; |
| 25849               | 22533 |     | 25120 |      |   |
| 1.99998081954106    | 100   | 150 | 0     | Open | ; |
| 25850               | 23283 |     | 25493 |      |   |

|                  |       |     |       |      |   |
|------------------|-------|-----|-------|------|---|
| 11.2347418211123 | 100   | 150 | 0     | Open | ; |
| 25851            | 24971 |     | 25303 |      |   |
| 1.99998099952197 | 100   | 150 | 0     | Open | ; |
| 25852            | 23467 |     | 25214 |      |   |
| 1.99996705187387 | 100   | 150 | 0     | Open | ; |
| 25853            | 22030 |     | 25400 |      |   |
| 2.004602483248   | 100   | 150 | 0     | Open | ; |
| 25854            | 19083 |     | 25366 |      |   |
| 1.99998124966382 | 100   | 150 | 0     | Open | ; |
| 25855            | 23884 |     | 25532 |      |   |
| 1.99997069299188 | 100   | 150 | 0     | Open | ; |
| 25856            | 21811 |     | 25267 |      |   |
| 2.00008184370908 | 100   | 150 | 0     | Open | ; |
| 25857            | 22078 |     | 25609 |      |   |
| 1.99998249021143 | 100   | 150 | 0     | Open | ; |
| 25858            | 22314 |     | 25124 |      |   |
| 1.99998248939372 | 100   | 150 | 0     | Open | ; |
| 25859            | 19837 |     | 25091 |      |   |
| 1.99998248970257 | 100   | 150 | 0     | Open | ; |
| 25860            | 23473 |     | 25624 |      |   |
| 1.99998271985271 | 100   | 150 | 0     | Open | ; |
| 25861            | 23009 |     | 25390 |      |   |
| 1.99998271983023 | 100   | 150 | 0     | Open | ; |
| 25862            | 23163 |     | 25627 |      |   |
| 1.99998285159191 | 100   | 150 | 0     | Open | ; |
| 25863            | 21665 |     | 25249 |      |   |
| 2.00008219234618 | 100   | 150 | 0     | Open | ; |
| 25864            | 21578 |     | 25555 |      |   |
| 1.99997594135948 | 100   | 150 | 0     | Open | ; |
| 25865            | 22037 |     | 25244 |      |   |
| 1.99998343979857 | 100   | 150 | 0     | Open | ; |
| 25866            | 23637 |     | 25655 |      |   |
| 1.99998351955414 | 100   | 150 | 0     | Open | ; |
| 25867            | 23956 |     | 25173 |      |   |
| 9.83945928114191 | 100   | 150 | 0     | Open | ; |
| 25868            | 21077 |     | 25255 |      |   |
| 1.99998369198195 | 100   | 150 | 0     | Open | ; |
| 25869            | 21663 |     | 25316 |      |   |
| 1.99999159158869 | 100   | 150 | 0     | Open | ; |
| 25870            | 23324 |     | 25545 |      |   |
| 1.99998271983023 | 100   | 150 | 0     | Open | ; |
| 25871            | 19810 |     | 25539 |      |   |
| 1.99998415990887 | 100   | 150 | 0     | Open | ; |
| 25872            | 18760 |     | 25332 |      |   |
| 1.99998485016091 | 100   | 150 | 0     | Open | ; |
| 25873            | 23483 |     | 25288 |      |   |
| 9.65720283052089 | 100   | 150 | 0     | Open | ; |
| 25874            | 21247 |     | 25460 |      |   |
| 2.000079213878   | 100   | 150 | 0     | Open | ; |
| 25875            | 19496 |     | 25450 |      |   |



|                     |       |     |       |      |   |
|---------------------|-------|-----|-------|------|---|
| 2.00008418355094    | 100   | 150 | 0     | Open | ; |
| 25876               | 22918 |     | 25488 |      |   |
| 1.99998537057531    | 100   | 150 | 0     | Open | ; |
| 25877               | 22398 |     | 25103 |      |   |
| 1.99998545017344    | 100   | 150 | 0     | Open | ; |
| 25878               | 19228 |     | 25171 |      |   |
| 1.99998544991635    | 100   | 150 | 0     | Open | ; |
| 25879               | 23536 |     | 25548 |      |   |
| 1.99998545011968    | 100   | 150 | 0     | Open | ; |
| 25880               | 20303 |     | 25108 |      |   |
| 2.00008522350989    | 100   | 150 | 0     | Open | ; |
| 25881               | 24821 |     | 25573 |      |   |
| 1.9999857304451 100 |       | 150 | 0     | Open | ; |
| 25882               | 20991 |     | 25216 |      |   |
| 1.99998847261078    | 100   | 150 | 0     | Open | ; |
| 25883               | 18696 |     | 25263 |      |   |
| 1.99998485101013    | 100   | 150 | 0     | Open | ; |
| 25884               | 25011 |     | 25474 |      |   |
| 1.99998675894817    | 100   | 150 | 0     | Open | ; |
| 25885               | 22397 |     | 25283 |      |   |
| 1.99998724868405    | 100   | 150 | 0     | Open | ; |
| 25886               | 22981 |     | 25613 |      |   |
| 1.99998725091548    | 100   | 150 | 0     | Open | ; |
| 25887               | 23986 |     | 25434 |      |   |
| 11.2459053194159    | 100   | 150 | 0     | Open | ; |
| 25888               | 25019 |     | 25587 |      |   |
| 1.99997681326005    | 100   | 150 | 0     | Open | ; |
| 25889               | 23244 |     | 25240 |      |   |
| 1.99988851165817    | 100   | 150 | 0     | Open | ; |
| 25890               | 21733 |     | 25615 |      |   |
| 2.00008649342572    | 100   | 150 | 0     | Open | ; |
| 25891               | 20143 |     | 25520 |      |   |
| 1.99998770024943    | 100   | 150 | 0     | Open | ; |
| 25892               | 25015 |     | 25395 |      |   |
| 1.99990234086739    | 100   | 150 | 0     | Open | ; |
| 25893               | 20549 |     | 25301 |      |   |
| 2.00000516053307    | 100   | 150 | 0     | Open | ; |
| 25894               | 23959 |     | 25408 |      |   |
| 1.99998848922169    | 100   | 150 | 0     | Open | ; |
| 25895               | 23277 |     | 25248 |      |   |
| 1.99997657132356    | 100   | 150 | 0     | Open | ; |
| 25896               | 22382 |     | 25284 |      |   |
| 1.99998724979976    | 100   | 150 | 0     | Open | ; |
| 25897               | 22262 |     | 25204 |      |   |
| 1.99998724966331    | 100   | 150 | 0     | Open | ; |
| 25898               | 19700 |     | 25562 |      |   |
| 1.99998872956939    | 100   | 150 | 0     | Open | ; |
| 25899               | 21351 |     | 25649 |      |   |
| 2.00008871285051    | 100   | 150 | 0     | Open | ; |
| 25900               | 22629 |     | 25345 |      |   |

|                     |       |     |       |      |   |
|---------------------|-------|-----|-------|------|---|
| 1.99989607278048    | 100   | 150 | 0     | Open | ; |
| 25901               | 23675 |     | 25239 |      |   |
| 2.00008826433331    | 100   | 150 | 0     | Open | ; |
| 25902               | 23518 |     | 25242 |      |   |
| 1.99989064172725    | 100   | 150 | 0     | Open | ; |
| 25903               | 20864 |     | 25221 |      |   |
| 2.00008979313985    | 100   | 150 | 0     | Open | ; |
| 25904               | 21624 |     | 25614 |      |   |
| 1.99998724958891    | 100   | 150 | 0     | Open | ; |
| 25905               | 22768 |     | 25338 |      |   |
| 1.9999902902076 100 |       | 150 | 0     | Open | ; |
| 25906               | 23110 |     | 25336 |      |   |
| 1.99999029098468    | 100   | 150 | 0     | Open | ; |
| 25907               | 19296 |     | 25294 |      |   |
| 2.00008945212333    | 100   | 150 | 0     | Open | ; |
| 25908               | 19988 |     | 25233 |      |   |
| 1.99999040067542    | 100   | 150 | 0     | Open | ; |
| 25909               | 23551 |     | 25377 |      |   |
| 2.00009017510962    | 100   | 150 | 0     | Open | ; |
| 25910               | 21557 |     | 25080 |      |   |
| 1.99999049901582    | 100   | 150 | 0     | Open | ; |
| 25911               | 19184 |     | 25088 |      |   |
| 1.99999061004978    | 100   | 150 | 0     | Open | ; |
| 25912               | 23800 |     | 25169 |      |   |
| 2.41119069978551    | 100   | 150 | 0     | Open | ; |
| 25913               | 23748 |     | 25591 |      |   |
| 1.999990730111 100  |       | 150 | 0     | Open | ; |
| 25914               | 19696 |     | 25257 |      |   |
| 1.99999076024886    | 100   | 150 | 0     | Open | ; |
| 25915               | 23390 |     | 25651 |      |   |
| 1.99997615238407    | 100   | 150 | 0     | Open | ; |
| 25916               | 21607 |     | 25422 |      |   |
| 1.99999117126882    | 100   | 150 | 0     | Open | ; |
| 25917               | 22060 |     | 25096 |      |   |
| 2.0000462212912 100 |       | 150 | 0     | Open | ; |
| 25918               | 19323 |     | 25418 |      |   |
| 1.99997837298343    | 100   | 150 | 0     | Open | ; |
| 25919               | 19422 |     | 25648 |      |   |
| 1.99999140132551    | 100   | 150 | 0     | Open | ; |
| 25920               | 18930 |     | 25612 |      |   |
| 1.99998725165068    | 100   | 150 | 0     | Open | ; |
| 25921               | 23355 |     | 25401 |      |   |
| 11.3059098149894    | 100   | 150 | 0     | Open | ; |
| 25922               | 23316 |     | 25501 |      |   |
| 2.00000090341664    | 100   | 150 | 0     | Open | ; |
| 25923               | 24039 |     | 25222 |      |   |
| 2.00008929304829    | 100   | 150 | 0     | Open | ; |
| 25924               | 21551 |     | 25453 |      |   |
| 2.42789201816452    | 100   | 150 | 0     | Open | ; |
| 25925               | 22070 |     | 25085 |      |   |

|                     |       |     |       |      |   |
|---------------------|-------|-----|-------|------|---|
| 1.99998724979976    | 100   | 150 | 0     | Open | ; |
| 25926               | 20550 |     | 25428 |      |   |
| 1.99999340896714    | 100   | 150 | 0     | Open | ; |
| 25927               | 23039 |     | 25572 |      |   |
| 2.00009360161009    | 100   | 150 | 0     | Open | ; |
| 25928               | 19157 |     | 25333 |      |   |
| 1.99990906186517    | 100   | 150 | 0     | Open | ; |
| 25929               | 19143 |     | 25285 |      |   |
| 1.99999400955837    | 100   | 150 | 0     | Open | ; |
| 25930               | 25002 |     | 25540 |      |   |
| 2.00009406206384    | 100   | 150 | 0     | Open | ; |
| 25931               | 24030 |     | 25346 |      |   |
| 1.99999424892608    | 100   | 150 | 0     | Open | ; |
| 25932               | 21462 |     | 25234 |      |   |
| 1.99999425097271    | 100   | 150 | 0     | Open | ; |
| 25933               | 20330 |     | 25299 |      |   |
| 2.00009431230106    | 100   | 150 | 0     | Open | ; |
| 25934               | 19369 |     | 25259 |      |   |
| 1.99990064180562    | 100   | 150 | 0     | Open | ; |
| 25935               | 19590 |     | 25281 |      |   |
| 1.99999457032343    | 100   | 150 | 0     | Open | ; |
| 25936               | 24046 |     | 25279 |      |   |
| 1.99999458033629    | 100   | 150 | 0     | Open | ; |
| 25937               | 21548 |     | 25459 |      |   |
| 2.00009213451906    | 100   | 150 | 0     | Open | ; |
| 25938               | 19801 |     | 25586 |      |   |
| 1.99999481058988    | 100   | 150 | 0     | Open | ; |
| 25939               | 21925 |     | 25636 |      |   |
| 1.99999495971936    | 100   | 150 | 0     | Open | ; |
| 25940               | 23428 |     | 25126 |      |   |
| 1.9999817341368 100 |       | 150 | 0     | Open | ; |
| 25941               | 21880 |     | 25330 |      |   |
| 2.00003205356828    | 100   | 150 | 0     | Open | ; |
| 25942               | 22099 |     | 25427 |      |   |
| 2.00001385291074    | 100   | 150 | 0     | Open | ; |
| 25943               | 19841 |     | 25290 |      |   |
| 2.00009213243854    | 100   | 150 | 0     | Open | ; |
| 25944               | 21013 |     | 25654 |      |   |
| 2.00009644190398    | 100   | 150 | 0     | Open | ; |
| 25945               | 21706 |     | 25419 |      |   |
| 1.99999660994024    | 100   | 150 | 0     | Open | ; |
| 25946               | 22691 |     | 25660 |      |   |
| 1.99989800306126    | 100   | 150 | 0     | Open | ; |
| 25947               | 21138 |     | 25574 |      |   |
| 1.99999667888631    | 100   | 150 | 0     | Open | ; |
| 25948               | 24634 |     | 25593 |      |   |
| 2.00000020292704    | 100   | 150 | 0     | Open | ; |
| 25949               | 23629 |     | 25246 |      |   |
| 1.99999752004823    | 100   | 150 | 0     | Open | ; |
| 25950               | 19515 |     | 25315 |      |   |

|                     |       |     |       |      |   |
|---------------------|-------|-----|-------|------|---|
| 2.00009644201922    | 100   | 150 | 0     | Open | ; |
| 25951               | 21693 |     | 25132 |      |   |
| 2.00009686256392    | 100   | 150 | 0     | Open | ; |
| 25952               | 22294 |     | 25130 |      |   |
| 2.90231933364601    | 100   | 150 | 0     | Open | ; |
| 25953               | 23878 |     | 25393 |      |   |
| 1.99999826072581    | 100   | 150 | 0     | Open | ; |
| 25954               | 21249 |     | 25461 |      |   |
| 1.99990507168747    | 100   | 150 | 0     | Open | ; |
| 25955               | 23008 |     | 25176 |      |   |
| 10.9249342024505    | 100   | 150 | 0     | Open | ; |
| 25956               | 19451 |     | 25596 |      |   |
| 1.99999881060441    | 100   | 150 | 0     | Open | ; |
| 25957               | 21742 |     | 25167 |      |   |
| 2.0000985432114 100 |       | 150 | 0     | Open | ; |
| 25958               | 24076 |     | 23563 |      |   |
| 0.27533465112005    | 100   | 140 | 0     | Open | ; |
| 25959               | 20436 |     | 20437 |      |   |
| 0.349007735895641   | 200   | 140 | 0     | Open | ; |
| 25960               | 24274 |     | 23585 |      |   |
| 0.375092854964139   | 300   | 140 | 0     | Open | ; |
| 25961               | 19558 |     | 24915 |      |   |
| 0.48272937461952    | 250   | 100 | 0     | Open | ; |
| 25962               | 23166 |     | 24686 |      |   |
| 0.638931185825218   | 100   | 150 | 0     | Open | ; |
| 25963               | 24686 |     | 24687 |      |   |
| 0.659688751963656   | 100   | 150 | 0     | Open | ; |
| 25964               | 24068 |     | 23923 |      |   |
| 0.675163166316363   | 150   | 140 | 0     | Open | ; |
| 25965               | 24379 |     | 24068 |      |   |
| 0.693326249371428   | 150   | 140 | 0     | Open | ; |
| 25966               | 22614 |     | 24379 |      |   |
| 0.710985239290999   | 150   | 140 | 0     | Open | ; |
| 25967               | 24726 |     | 25691 |      |   |
| 1.12411123868107    | 100   | 150 | 0     | Open | ; |
| 25968               | 23149 |     | 18854 |      |   |
| 0.800755368228019   | 125   | 140 | 0     | Open | ; |
| 25969               | 23636 |     | 23923 |      |   |
| 0.810498543777525   | 350   | 140 | 0     | Open | ; |
| 25970               | 24682 |     | 24683 |      |   |
| 0.821048232804606   | 100   | 150 | 0     | Open | ; |
| 25971               | 24682 |     | 24691 |      |   |
| 0.896330743509418   | 160   | 150 | 0     | Open | ; |
| 25972               | 24725 |     | 25689 |      |   |
| 1.51585808470218    | 100   | 150 | 0     | Open | ; |
| 25973               | 24493 |     | 24494 |      |   |
| 0.999952523095687   | 100   | 150 | 0     | Open | ; |
| 25974               | 24467 |     | 24488 |      |   |
| 0.999962689506704   | 100   | 150 | 0     | Open | ; |
| 25975               | 24425 |     | 24426 |      |   |

|                     |       |     |       |      |   |
|---------------------|-------|-----|-------|------|---|
| 0.999964364363693   | 100   | 150 | 0     | Open | ; |
| 25976               | 19270 |     | 24425 |      |   |
| 0.134185508432784   | 100   | 150 | 0     | Open | ; |
| 25977               | 24455 |     | 24458 |      |   |
| 0.999974525177635   | 110   | 100 | 0     | Open | ; |
| 25978               | 24508 |     | 24509 |      |   |
| 0.999979650338702   | 110   | 100 | 0     | Open | ; |
| 25979               | 24444 |     | 23151 |      |   |
| 0.999985539808016   | 100   | 150 | 0     | Open | ; |
| 25980               | 23151 |     | 23152 |      |   |
| 0.999985539695951   | 100   | 150 | 0     | Open | ; |
| 25981               | 24786 |     | 24787 |      |   |
| 0.999993745208234   | 110   | 100 | 0     | Open | ; |
| 25982               | 24494 |     | 24495 |      |   |
| 0.999995919709295   | 100   | 100 | 0     | Open | ; |
| 25983               | 24454 |     | 24455 |      |   |
| 1.00000448952228    | 110   | 150 | 0     | Open | ; |
| 25984               | 24785 |     | 24786 |      |   |
| 1.00000952556615    | 160   | 150 | 0     | Open | ; |
| 25985               | 24781 |     | 24782 |      |   |
| 1.0000220196518 160 |       | 150 | 0     | Open | ; |
| 25986               | 24505 |     | 24508 |      |   |
| 1.00002244380105    | 110   | 150 | 0     | Open | ; |
| 25987               | 24555 |     | 24556 |      |   |
| 1.00002500536363    | 100   | 150 | 0     | Open | ; |
| 25988               | 24782 |     | 24783 |      |   |
| 1.00002920937282    | 110   | 100 | 0     | Open | ; |
| 25989               | 24488 |     | 24489 |      |   |
| 1.00003072403846    | 100   | 100 | 0     | Open | ; |
| 25990               | 24556 |     | 24557 |      |   |
| 1.00003546474475    | 100   | 100 | 0     | Open | ; |
| 25991               | 24680 |     | 24681 |      |   |
| 1.0043078465281 100 |       | 150 | 0     | Open | ; |
| 25992               | 24684 |     | 24685 |      |   |
| 1.0057048670168 100 |       | 150 | 0     | Open | ; |
| 25993               | 24596 |     | 23143 |      |   |
| 1.00939080529393    | 200   | 150 | 0     | Open | ; |
| 25994               | 21942 |     | 21898 |      |   |
| 1.02470531368477    | 160   | 150 | 0     | Open | ; |
| 25995               | 22445 |     | 18995 |      |   |
| 1.03729679982219    | 75    | 100 | 0     | Open | ; |
| 25996               | 24237 |     | 23925 |      |   |
| 1.0395184901707 150 |       | 140 | 0     | Open | ; |
| 25997               | 19018 |     | 21681 |      |   |
| 1.04564478193097    | 250   | 140 | 0     | Open | ; |
| 25998               | 23189 |     | 24684 |      |   |
| 1.05116610051603    | 100   | 150 | 0     | Open | ; |
| 25999               | 22132 |     | 22133 |      |   |
| 1.06078782562705    | 450   | 100 | 0     | Open | ; |
| 26000               | 24694 |     | 24680 |      |   |

|                     |       |     |       |      |   |
|---------------------|-------|-----|-------|------|---|
| 1.06750162900602    | 100   | 150 | 0     | Open | ; |
| 26001               | 24326 |     | 21821 |      |   |
| 1.0837163471038 110 |       | 150 | 0     | Open | ; |
| 26002               | 23176 |     | 24691 |      |   |
| 1.09403857373526    | 160   | 150 | 0     | Open | ; |
| 26003               | 24237 |     | 23833 |      |   |
| 1.09554926818926    | 150   | 140 | 0     | Open | ; |
| 26004               | 22779 |     | 18798 |      |   |
| 1.1512098550042 300 |       | 140 | 0     | Open | ; |
| 26005               | 21985 |     | 19496 |      |   |
| 1.17558903148724    | 75    | 150 | 0     | Open | ; |
| 26006               | 24704 |     | 24688 |      |   |
| 1.20274975348512    | 100   | 150 | 0     | Open | ; |
| 26007               | 22724 |     | 22725 |      |   |
| 1.23424866591198    | 125   | 150 | 0     | Open | ; |
| 26008               | 18853 |     | 18855 |      |   |
| 1.25002379594817    | 160   | 150 | 0     | Open | ; |
| 26009               | 24695 |     | 24445 |      |   |
| 1.27890738542976    | 160   | 150 | 0     | Open | ; |
| 26010               | 24870 |     | 24872 |      |   |
| 1.2808694940681 200 |       | 150 | 0     | Open | ; |
| 26011               | 22021 |     | 24301 |      |   |
| 1.28781695879168    | 125   | 150 | 0     | Open | ; |
| 26012               | 19199 |     | 19200 |      |   |
| 1.31249148179519    | 75    | 140 | 0     | Open | ; |
| 26013               | 24747 |     | 24740 |      |   |
| 1.31421415691867    | 160   | 150 | 0     | Open | ; |
| 26014               | 24739 |     | 24743 |      |   |
| 1.3311589310997 110 |       | 150 | 0     | Open | ; |
| 26015               | 24900 |     | 22242 |      |   |
| 1.33507941695396    | 200   | 150 | 0     | Open | ; |
| 26016               | 24120 |     | 22758 |      |   |
| 1.96705452015275    | 140   | 150 | 0     | Open | ; |
| 26017               | 21999 |     | 22000 |      |   |
| 1.37013395680881    | 300   | 140 | 0     | Open | ; |
| 26018               | 24795 |     | 25692 |      |   |
| 1.99996938434982    | 110   | 150 | 0     | Open | ; |
| 26019               | 24629 |     | 25676 |      |   |
| 1.99998431501808    | 100   | 150 | 0     | Open | ; |
| 26020               | 24850 |     | 24852 |      |   |
| 1.39565262870751    | 500   | 130 | 0     | Open | ; |
| 26021               | 19605 |     | 19606 |      |   |
| 1.39932581628287    | 160   | 150 | 0     | Open | ; |
| 26022               | 19603 |     | 19604 |      |   |
| 1.39942581401753    | 160   | 150 | 0     | Open | ; |
| 26023               | 25696 |     | 25698 |      |   |
| 1.98871137940567    | 100   | 150 | 0     | Open | ; |
| 26024               | 24560 |     | 24463 |      |   |
| 1.40211361874121    | 110   | 150 | 0     | Open | ; |
| 26025               | 20892 |     | 23966 |      |   |

|                     |       |     |       |      |   |
|---------------------|-------|-----|-------|------|---|
| 1.40270836617661    | 200   | 150 | 0     | Open | ; |
| 26027               | 24483 |     | 25675 |      |   |
| 1.12478994507289    | 100   | 150 | 0     | Open | ; |
| 26028               | 24918 |     | 24919 |      |   |
| 1.4057227931813 125 |       | 140 | 0     | Open | ; |
| 26029               | 24843 |     | 25695 |      |   |
| 2.00003525008595    | 110   | 150 | 0     | Open | ; |
| 26030               | 22454 |     | 22455 |      |   |
| 1.4096256268981 160 |       | 150 | 0     | Open | ; |
| 26031               | 19867 |     | 25699 |      |   |
| 1.99043857033315    | 100   | 150 | 0     | Open | ; |
| 26032               | 24617 |     | 25681 |      |   |
| 1.99991129383653    | 100   | 150 | 0     | Open | ; |
| 26033               | 22725 |     | 25633 |      |   |
| 1.99967814403799    | 100   | 150 | 0     | Open | ; |
| 26034               | 19094 |     | 25504 |      |   |
| 1.99990279748499    | 100   | 150 | 0     | Open | ; |
| 26035               | 21977 |     | 25206 |      |   |
| 1.99990900054335    | 100   | 150 | 0     | Open | ; |
| 26036               | 19316 |     | 25309 |      |   |
| 1.99991092850264    | 100   | 150 | 0     | Open | ; |
| 26037               | 20664 |     | 25369 |      |   |
| 1.99992090997527    | 100   | 150 | 0     | Open | ; |
| 26038               | 19235 |     | 25588 |      |   |
| 1.99991300889992    | 100   | 150 | 0     | Open | ; |
| 26039               | 23235 |     | 25569 |      |   |
| 1.9999138483175 100 |       | 150 | 0     | Open | ; |
| 26040               | 23864 |     | 25392 |      |   |
| 1.99991564681877    | 100   | 150 | 0     | Open | ; |
| 26041               | 23969 |     | 25236 |      |   |
| 2.00001584503816    | 100   | 150 | 0     | Open | ; |
| 26042               | 19469 |     | 25486 |      |   |
| 11.0471416503169    | 100   | 150 | 0     | Open | ; |
| 26043               | 23968 |     | 25230 |      |   |
| 2.00001584507294    | 100   | 150 | 0     | Open | ; |
| 26044               | 25029 |     | 25129 |      |   |
| 1.99991969891786    | 100   | 150 | 0     | Open | ; |
| 26045               | 22423 |     | 25117 |      |   |
| 1.99993582149872    | 100   | 150 | 0     | Open | ; |
| 26046               | 19443 |     | 25616 |      |   |
| 1.99993844163174    | 100   | 150 | 0     | Open | ; |
| 26047               | 23052 |     | 25670 |      |   |
| 1.9999252491861 100 |       | 150 | 0     | Open | ; |
| 26048               | 19919 |     | 25094 |      |   |
| 1.99992524802449    | 100   | 150 | 0     | Open | ; |
| 26049               | 23378 |     | 25581 |      |   |
| 1.99992679752703    | 100   | 150 | 0     | Open | ; |
| 26050               | 22018 |     | 25479 |      |   |
| 1.99992679918307    | 100   | 150 | 0     | Open | ; |
| 26051               | 23898 |     | 25619 |      |   |

|                     |       |     |       |      |   |
|---------------------|-------|-----|-------|------|---|
| 1.99992832910724    | 100   | 150 | 0     | Open | ; |
| 26052               | 19289 |     | 25162 |      |   |
| 1.99993625072911    | 100   | 150 | 0     | Open | ; |
| 26053               | 24940 |     | 25653 |      |   |
| 1.9999177510103 100 |       | 150 | 0     | Open | ; |
| 26054               | 22252 |     | 25405 |      |   |
| 2.00002382407957    | 100   | 150 | 0     | Open | ; |
| 26055               | 19429 |     | 25077 |      |   |
| 2.00002990459165    | 100   | 150 | 0     | Open | ; |
| 26056               | 22904 |     | 25497 |      |   |
| 1.99993031936852    | 100   | 150 | 0     | Open | ; |
| 26057               | 23160 |     | 25671 |      |   |
| 1.99993052818118    | 100   | 150 | 0     | Open | ; |
| 26058               | 21191 |     | 25469 |      |   |
| 1.99993132866695    | 100   | 150 | 0     | Open | ; |
| 26059               | 23481 |     | 25449 |      |   |
| 1.99992740065024    | 100   | 150 | 0     | Open | ; |
| 26060               | 18785 |     | 25471 |      |   |
| 1.99995788143647    | 100   | 150 | 0     | Open | ; |
| 26061               | 23999 |     | 25420 |      |   |
| 1.99993456997377    | 100   | 150 | 0     | Open | ; |
| 26062               | 18631 |     | 25081 |      |   |
| 2.00003477405246    | 100   | 150 | 0     | Open | ; |
| 26063               | 24000 |     | 25563 |      |   |
| 1.99993456997377    | 100   | 150 | 0     | Open | ; |
| 26064               | 22976 |     | 25083 |      |   |
| 1.99993660962138    | 100   | 150 | 0     | Open | ; |
| 26065               | 23135 |     | 25433 |      |   |
| 9.84773164132944    | 100   | 150 | 0     | Open | ; |
| 26066               | 23203 |     | 25602 |      |   |
| 1.99993720986332    | 100   | 150 | 0     | Open | ; |
| 26067               | 19937 |     | 25295 |      |   |
| 1.999937278201 100  |       | 150 | 0     | Open | ; |
| 26068               | 24889 |     | 25701 |      |   |
| 2.000006803147 100  |       | 150 | 0     | Open | ; |
| 26069               | 23470 |     | 25196 |      |   |
| 1.99993759959254    | 100   | 150 | 0     | Open | ; |
| 26070               | 18607 |     | 25192 |      |   |
| 1.9999376397249 100 |       | 150 | 0     | Open | ; |
| 26071               | 18656 |     | 25228 |      |   |
| 1.99993777883303    | 100   | 150 | 0     | Open | ; |
| 26072               | 22375 |     | 25370 |      |   |
| 1.99993777874788    | 100   | 150 | 0     | Open | ; |
| 26073               | 23935 |     | 25630 |      |   |
| 2.00003660445225    | 100   | 150 | 0     | Open | ; |
| 26074               | 22124 |     | 25273 |      |   |
| 1.99999904958749    | 100   | 150 | 0     | Open | ; |
| 26075               | 20673 |     | 25464 |      |   |
| 1.9999990904372 100 |       | 150 | 0     | Open | ; |
| 26076               | 19178 |     | 25534 |      |   |



|                     |       |     |       |      |   |
|---------------------|-------|-----|-------|------|---|
| 1.99999961986412    | 100   | 150 | 0     | Open | ; |
| 26077               | 25038 |     | 25429 |      |   |
| 1.99993998231566    | 100   | 150 | 0     | Open | ; |
| 26078               | 23670 |     | 25432 |      |   |
| 10.5212526440406    | 100   | 150 | 0     | Open | ; |
| 26079               | 21890 |     | 25518 |      |   |
| 1.99999999968958    | 100   | 150 | 0     | Open | ; |
| 26080               | 23259 |     | 25448 |      |   |
| 1.99990078270843    | 100   | 150 | 0     | Open | ; |
| 26081               | 21699 |     | 25643 |      |   |
| 2.00000003968934    | 100   | 150 | 0     | Open | ; |
| 26082               | 25014 |     | 25074 |      |   |
| 2.00009930284886    | 100   | 150 | 0     | Open | ; |
| 26083               | 20659 |     | 25123 |      |   |
| 2.00000071900072    | 100   | 150 | 0     | Open | ; |
| 26084               | 23094 |     | 25207 |      |   |
| 2.00000081976959    | 100   | 150 | 0     | Open | ; |
| 26085               | 19760 |     | 25549 |      |   |
| 2.00010000229863    | 100   | 150 | 0     | Open | ; |
| 26086               | 21447 |     | 25217 |      |   |
| 1.99990141259069    | 100   | 150 | 0     | Open | ; |
| 26087               | 21474 |     | 25076 |      |   |
| 2.00000129930992    | 100   | 150 | 0     | Open | ; |
| 26088               | 24535 |     | 25625 |      |   |
| 2.00010052214887    | 100   | 150 | 0     | Open | ; |
| 26089               | 22247 |     | 25508 |      |   |
| 1.9999019634017 100 |       | 150 | 0     | Open | ; |
| 26090               | 21054 |     | 25223 |      |   |
| 2.00000193051707    | 100   | 150 | 0     | Open | ; |
| 26091               | 22086 |     | 25274 |      |   |
| 1.99990865312193    | 100   | 150 | 0     | Open | ; |
| 26092               | 19729 |     | 25114 |      |   |
| 2.00010220250031    | 100   | 150 | 0     | Open | ; |
| 26093               | 22022 |     | 25632 |      |   |
| 2.00002249273882    | 100   | 150 | 0     | Open | ; |
| 26094               | 23120 |     | 25529 |      |   |
| 2.00000269104214    | 100   | 150 | 0     | Open | ; |
| 26095               | 21129 |     | 25618 |      |   |
| 2.0000028896885 100 |       | 150 | 0     | Open | ; |
| 26096               | 23148 |     | 25099 |      |   |
| 1.99990325324605    | 100   | 150 | 0     | Open | ; |
| 26097               | 22999 |     | 25414 |      |   |
| 9.63553964245981    | 100   | 150 | 0     | Open | ; |
| 26098               | 18867 |     | 25095 |      |   |
| 2.00000329905593    | 100   | 150 | 0     | Open | ; |
| 26099               | 22971 |     | 25389 |      |   |
| 11.2979582641132    | 100   | 150 | 0     | Open | ; |
| 26100               | 20346 |     | 25326 |      |   |
| 2.00000359983102    | 100   | 150 | 0     | Open | ; |
| 26101               | 21861 |     | 25371 |      |   |

|                  |       |     |       |      |   |
|------------------|-------|-----|-------|------|---|
| 2.00001526204803 | 100   | 150 | 0     | Open | ; |
| 26102            | 22076 |     | 25226 |      |   |
| 2.00000436009309 | 100   | 150 | 0     | Open | ; |
| 26103            | 20855 |     | 25210 |      |   |
| 2.00000436016263 | 100   | 150 | 0     | Open | ; |
| 26104            | 21165 |     | 25292 |      |   |
| 2.00000440968536 | 100   | 150 | 0     | Open | ; |
| 26105            | 21234 |     | 25641 |      |   |
| 1.99990454267097 | 100   | 150 | 0     | Open | ; |
| 26106            | 19110 |     | 25500 |      |   |
| 2.00000474063179 | 100   | 150 | 0     | Open | ; |
| 26107            | 21124 |     | 25650 |      |   |
| 2.00001839355024 | 100   | 150 | 0     | Open | ; |
| 26108            | 20196 |     | 25528 |      |   |
| 2.00000768323007 | 100   | 150 | 0     | Open | ; |
| 26109            | 22688 |     | 25197 |      |   |
| 1.99990799260718 | 100   | 150 | 0     | Open | ; |
| 26110            | 19943 |     | 25639 |      |   |
| 1.99991212229559 | 100   | 150 | 0     | Open | ; |
| 26111            | 23352 |     | 25436 |      |   |
| 2.00000436019402 | 100   | 150 | 0     | Open | ; |
| 26112            | 20234 |     | 25514 |      |   |
| 2.00000254325659 | 100   | 150 | 0     | Open | ; |
| 26113            | 19298 |     | 25243 |      |   |
| 2.00000609958757 | 100   | 150 | 0     | Open | ; |
| 26114            | 20655 |     | 25424 |      |   |
| 2.00000612867615 | 100   | 150 | 0     | Open | ; |
| 26115            | 20081 |     | 25272 |      |   |
| 2.00000617947909 | 100   | 150 | 0     | Open | ; |
| 26116            | 20296 |     | 25523 |      |   |
| 1.99991254318015 | 100   | 150 | 0     | Open | ; |
| 26117            | 21113 |     | 25166 |      |   |
| 2.00000673971529 | 100   | 150 | 0     | Open | ; |
| 26118            | 18862 |     | 25164 |      |   |
| 2.00000682114879 | 100   | 150 | 0     | Open | ; |
| 26119            | 19477 |     | 25517 |      |   |
| 2.00000705866291 | 100   | 150 | 0     | Open | ; |
| 26120            | 20903 |     | 25097 |      |   |
| 2.00000706062328 | 100   | 150 | 0     | Open | ; |
| 26121            | 19454 |     | 25312 |      |   |
| 2.00000729090401 | 100   | 150 | 0     | Open | ; |
| 26122            | 25027 |     | 25227 |      |   |
| 2.00000609877026 | 100   | 150 | 0     | Open | ; |
| 26123            | 23066 |     | 25349 |      |   |
| 2.00000612935868 | 100   | 150 | 0     | Open | ; |
| 26124            | 20068 |     | 25337 |      |   |
| 2.00000617952841 | 100   | 150 | 0     | Open | ; |
| 26125            | 21095 |     | 25287 |      |   |
| 1.99990846222481 | 100   | 150 | 0     | Open | ; |
| 26126            | 23437 |     | 25174 |      |   |

|                  |       |     |       |      |   |
|------------------|-------|-----|-------|------|---|
| 10.9107535675033 | 100   | 150 | 0     | Open | ; |
| 26127            | 23136 |     | 25111 |      |   |
| 9.84796959987267 | 100   | 150 | 0     | Open | ; |
| 26128            | 21605 |     | 25297 |      |   |
| 2.00000857915947 | 100   | 150 | 0     | Open | ; |
| 26129            | 23790 |     | 25413 |      |   |
| 9.84111380460786 | 100   | 150 | 0     | Open | ; |
| 26130            | 20993 |     | 25598 |      |   |
| 1.99991011402862 | 100   | 150 | 0     | Open | ; |
| 26131            | 22633 |     | 25443 |      |   |
| 2.00000930012028 | 100   | 150 | 0     | Open | ; |
| 26132            | 22031 |     | 25482 |      |   |
| 11.3024981313093 | 100   | 150 | 0     | Open | ; |
| 26133            | 23524 |     | 25296 |      |   |
| 2.00001020985741 | 100   | 150 | 0     | Open | ; |
| 26134            | 18781 |     | 25455 |      |   |
| 2.00001025030992 | 100   | 150 | 0     | Open | ; |
| 26135            | 23215 |     | 25201 |      |   |
| 2.00001042023566 | 100   | 150 | 0     | Open | ; |
| 26136            | 21126 |     | 25652 |      |   |
| 1.99991154299903 | 100   | 150 | 0     | Open | ; |
| 26137            | 21909 |     | 25468 |      |   |
| 2.00001050143154 | 100   | 150 | 0     | Open | ; |
| 26138            | 19384 |     | 25621 |      |   |
| 2.00001089043553 | 100   | 150 | 0     | Open | ; |
| 26139            | 20977 |     | 25211 |      |   |
| 1.99997681198362 | 100   | 150 | 0     | Open | ; |
| 26140            | 22113 |     | 25351 |      |   |
| 2.00001205089968 | 100   | 150 | 0     | Open | ; |
| 26141            | 23101 |     | 25487 |      |   |
| 9.63834907077436 | 100   | 150 | 0     | Open | ; |
| 26142            | 23625 |     | 25318 |      |   |
| 2.00001231952538 | 100   | 150 | 0     | Open | ; |
| 26143            | 22726 |     | 25308 |      |   |
| 2.0000027915338  | 100   | 150 | 0     | Open | ; |
| 26144            | 23415 |     | 25170 |      |   |
| 2.00002385198499 | 100   | 150 | 0     | Open | ; |
| 26145            | 18543 |     | 25224 |      |   |
| 2.00000791295596 | 100   | 150 | 0     | Open | ; |
| 26146            | 22233 |     | 25447 |      |   |
| 2.90187856671633 | 100   | 150 | 0     | Open | ; |
| 26147            | 23479 |     | 25271 |      |   |
| 1.99991723293077 | 100   | 150 | 0     | Open | ; |
| 26148            | 23820 |     | 25585 |      |   |
| 2.00001266073865 | 100   | 150 | 0     | Open | ; |
| 26149            | 22906 |     | 25394 |      |   |
| 2.00001269024692 | 100   | 150 | 0     | Open | ; |
| 26150            | 23088 |     | 25480 |      |   |
| 1.99991285328873 | 100   | 150 | 0     | Open | ; |
| 26151            | 20841 |     | 25340 |      |   |

|                     |       |     |       |      |   |
|---------------------|-------|-----|-------|------|---|
| 1.99999074319617    | 100   | 150 | 0     | Open | ; |
| 26152               | 23197 |     | 25519 |      |   |
| 2.00001296078653    | 100   | 150 | 0     | Open | ; |
| 26153               | 20011 |     | 25571 |      |   |
| 2.00002477379928    | 100   | 150 | 0     | Open | ; |
| 26154               | 24999 |     | 25359 |      |   |
| 2.00001333092693    | 100   | 150 | 0     | Open | ; |
| 26155               | 23113 |     | 25510 |      |   |
| 2.00000159206647    | 100   | 150 | 0     | Open | ; |
| 26156               | 18601 |     | 25261 |      |   |
| 2.00001204957572    | 100   | 150 | 0     | Open | ; |
| 26157               | 22898 |     | 25444 |      |   |
| 1.99991695246592    | 100   | 150 | 0     | Open | ; |
| 26158               | 22287 |     | 25298 |      |   |
| 2.00001380077032    | 100   | 150 | 0     | Open | ; |
| 26159               | 20648 |     | 25116 |      |   |
| 2.0000011624421 100 |       | 150 | 0     | Open | ; |
| 26160               | 25008 |     | 25499 |      |   |
| 2.00000686218218    | 100   | 150 | 0     | Open | ; |
| 26161               | 23943 |     | 25421 |      |   |
| 1.99991476304967    | 100   | 150 | 0     | Open | ; |
| 26162               | 21884 |     | 25324 |      |   |
| 2.00001433967666    | 100   | 150 | 0     | Open | ; |
| 26163               | 23977 |     | 25232 |      |   |
| 2.00001453048613    | 100   | 150 | 0     | Open | ; |
| 26164               | 22144 |     | 25082 |      |   |
| 2.00000798317254    | 100   | 150 | 0     | Open | ; |
| 26165               | 22630 |     | 25606 |      |   |
| 1.99991531335908    | 100   | 150 | 0     | Open | ; |
| 26166               | 18936 |     | 25425 |      |   |
| 2.00001380077032    | 100   | 150 | 0     | Open | ; |
| 26167               | 24042 |     | 25101 |      |   |
| 2.00001525186991    | 100   | 150 | 0     | Open | ; |
| 26168               | 21535 |     | 25567 |      |   |
| 2.00001568919329    | 100   | 150 | 0     | Open | ; |
| 26169               | 21391 |     | 25634 |      |   |
| 2.00010994196642    | 100   | 150 | 0     | Open | ; |
| 26170               | 19783 |     | 25365 |      |   |
| 11.044777176198 100 |       | 150 | 0     | Open | ; |
| 26171               | 23409 |     | 25485 |      |   |
| 9.95373391654711    | 100   | 150 | 0     | Open | ; |
| 26172               | 25071 |     | 25387 |      |   |
| 10.9189708622245    | 100   | 150 | 0     | Open | ; |
| 26173               | 22390 |     | 25423 |      |   |
| 1.99999610200915    | 100   | 150 | 0     | Open | ; |
| 26174               | 23364 |     | 25195 |      |   |
| 1.99992940329 100   |       | 150 | 0     | Open | ; |
| 26175               | 18644 |     | 25566 |      |   |
| 1.99991791402127    | 100   | 150 | 0     | Open | ; |
| 26176               | 22286 |     | 25119 |      |   |

|                     |       |     |       |      |   |
|---------------------|-------|-----|-------|------|---|
| 2.00001701084522    | 100   | 150 | 0     | Open | ; |
| 26177               | 24001 |     | 25113 |      |   |
| 1.99991831364704    | 100   | 150 | 0     | Open | ; |
| 26178               | 21780 |     | 25412 |      |   |
| 2.00001768054195    | 100   | 150 | 0     | Open | ; |
| 26179               | 22239 |     | 25623 |      |   |
| 2.00001781124876    | 100   | 150 | 0     | Open | ; |
| 26180               | 24587 |     | 25112 |      |   |
| 11.027348700442 100 |       | 150 | 0     | Open | ; |
| 26181               | 19307 |     | 25291 |      |   |
| 9.63653870227092    | 100   | 150 | 0     | Open | ; |
| 26182               | 23434 |     | 25357 |      |   |
| 1.99996147220829    | 100   | 150 | 0     | Open | ; |
| 26183               | 20880 |     | 25252 |      |   |
| 2.00001848953264    | 100   | 150 | 0     | Open | ; |
| 26184               | 23647 |     | 25407 |      |   |
| 2.00001941027791    | 100   | 150 | 0     | Open | ; |
| 26185               | 22297 |     | 25435 |      |   |
| 2.000020020969 100  |       | 150 | 0     | Open | ; |
| 26186               | 22804 |     | 25102 |      |   |
| 2.00002058009533    | 100   | 150 | 0     | Open | ; |
| 26187               | 20753 |     | 25544 |      |   |
| 2.00001036312033    | 100   | 150 | 0     | Open | ; |
| 26188               | 21675 |     | 25107 |      |   |
| 2.91244544400251    | 100   | 150 | 0     | Open | ; |
| 26189               | 23331 |     | 25310 |      |   |
| 2.00001229207452    | 100   | 150 | 0     | Open | ; |
| 26190               | 19740 |     | 25426 |      |   |
| 2.00002178048575    | 100   | 150 | 0     | Open | ; |
| 26191               | 19971 |     | 25178 |      |   |
| 2.00002249901667    | 100   | 150 | 0     | Open | ; |
| 26192               | 21326 |     | 25478 |      |   |
| 2.00002260053986    | 100   | 150 | 0     | Open | ; |
| 26193               | 21122 |     | 25075 |      |   |
| 2.00001055324072    | 100   | 150 | 0     | Open | ; |
| 26194               | 22713 |     | 25542 |      |   |
| 1.99992376492133    | 100   | 150 | 0     | Open | ; |
| 26195               | 23843 |     | 25668 |      |   |
| 2.00002312884219    | 100   | 150 | 0     | Open | ; |
| 26196               | 22783 |     | 25262 |      |   |
| 2.00002313962284    | 100   | 150 | 0     | Open | ; |
| 26197               | 21584 |     | 25098 |      |   |
| 2.0000240095264 100 |       | 150 | 0     | Open | ; |
| 26198               | 21538 |     | 25600 |      |   |
| 2.00002410079767    | 100   | 150 | 0     | Open | ; |
| 26199               | 23962 |     | 25384 |      |   |
| 2.00002424931922    | 100   | 150 | 0     | Open | ; |
| 26200               | 23058 |     | 25601 |      |   |
| 2.00008964130896    | 100   | 150 | 0     | Open | ; |
| 26201               | 20129 |     | 25347 |      |   |

|                     |       |     |       |      |   |
|---------------------|-------|-----|-------|------|---|
| 2.0000245692758 100 |       | 150 | 0     | Open | ; |
| 26202               | 22786 |     | 25199 |      |   |
| 2.00002480946123    | 100   | 150 | 0     | Open | ; |
| 26203               | 23761 |     | 25669 |      |   |
| 2.0000249993012 100 |       | 150 | 0     | Open | ; |
| 26204               | 22426 |     | 25325 |      |   |
| 2.00002499832912    | 100   | 150 | 0     | Open | ; |
| 26205               | 19186 |     | 25538 |      |   |
| 1.99992746341734    | 100   | 150 | 0     | Open | ; |
| 26206               | 22867 |     | 25245 |      |   |
| 2.00002536863071    | 100   | 150 | 0     | Open | ; |
| 26207               | 19079 |     | 25559 |      |   |
| 2.00002553989562    | 100   | 150 | 0     | Open | ; |
| 26208               | 21375 |     | 25079 |      |   |
| 2.00002564019158    | 100   | 150 | 0     | Open | ; |
| 26209               | 24299 |     | 25172 |      |   |
| 2.00002588992786    | 100   | 150 | 0     | Open | ; |
| 26210               | 23431 |     | 25402 |      |   |
| 2.00002613033743    | 100   | 150 | 0     | Open | ; |
| 26211               | 21723 |     | 25313 |      |   |
| 1.99992641381189    | 100   | 150 | 0     | Open | ; |
| 26212               | 23264 |     | 25396 |      |   |
| 2.0000262487282 100 |       | 150 | 0     | Open | ; |
| 26213               | 21265 |     | 25381 |      |   |
| 2.00002624938851    | 100   | 150 | 0     | Open | ; |
| 26214               | 23099 |     | 25270 |      |   |
| 2.00002624883559    | 100   | 150 | 0     | Open | ; |
| 26215               | 20620 |     | 25127 |      |   |
| 2.00002684961892    | 100   | 150 | 0     | Open | ; |
| 26216               | 22968 |     | 25317 |      |   |
| 2.00001314226394    | 100   | 150 | 0     | Open | ; |
| 26217               | 18722 |     | 25531 |      |   |
| 2.62098919650431    | 100   | 150 | 0     | Open | ; |
| 26218               | 19484 |     | 25483 |      |   |
| 11.3064608290875    | 100   | 150 | 0     | Open | ; |
| 26219               | 20540 |     | 25327 |      |   |
| 2.0000270898183 100 |       | 150 | 0     | Open | ; |
| 26220               | 21066 |     | 25109 |      |   |
| 2.00002716928697    | 100   | 150 | 0     | Open | ; |
| 26221               | 19817 |     | 25251 |      |   |
| 2.00003939246755    | 100   | 150 | 0     | Open | ; |
| 26222               | 18826 |     | 25576 |      |   |
| 1.9999409746868 100 |       | 150 | 0     | Open | ; |
| 26223               | 23869 |     | 25078 |      |   |
| 2.00000910324075    | 100   | 150 | 0     | Open | ; |
| 26224               | 23446 |     | 25353 |      |   |
| 2.00002836084701    | 100   | 150 | 0     | Open | ; |
| 26225               | 22745 |     | 25200 |      |   |
| 2.00002855920719    | 100   | 150 | 0     | Open | ; |
| 26226               | 23462 |     | 25647 |      |   |

|                  |       |     |       |      |   |
|------------------|-------|-----|-------|------|---|
| 2.22929219632334 | 100   | 150 | 0     | Open | ; |
| 26227            | 18885 |     | 25575 |      |   |
| 2.00002864816003 | 100   | 150 | 0     | Open | ; |
| 26228            | 22915 |     | 25494 |      |   |
| 10.9439737659695 | 100   | 150 | 0     | Open | ; |
| 26229            | 22527 |     | 25441 |      |   |
| 2.00002879938161 | 100   | 150 | 0     | Open | ; |
| 26230            | 21921 |     | 25264 |      |   |
| 2.26691252258183 | 100   | 150 | 0     | Open | ; |
| 26231            | 24969 |     | 25629 |      |   |
| 2.00002929036041 | 100   | 150 | 0     | Open | ; |
| 26232            | 20203 |     | 25275 |      |   |
| 2.00002972990225 | 100   | 150 | 0     | Open | ; |
| 26233            | 20854 |     | 25521 |      |   |
| 2.00002231167782 | 100   | 150 | 0     | Open | ; |
| 26234            | 21411 |     | 25277 |      |   |
| 2.00003010075087 | 100   | 150 | 0     | Open | ; |
| 26235            | 23724 |     | 25362 |      |   |
| 2.0000303294353  | 100   | 150 | 0     | Open | ; |
| 26236            | 21956 |     | 25589 |      |   |
| 2.00001908255255 | 100   | 150 | 0     | Open | ; |
| 26237            | 23220 |     | 25658 |      |   |
| 2.00003036884993 | 100   | 150 | 0     | Open | ; |
| 26238            | 23450 |     | 25536 |      |   |
| 2.00003044891194 | 100   | 150 | 0     | Open | ; |
| 26239            | 23292 |     | 25218 |      |   |
| 2.00003066031122 | 100   | 150 | 0     | Open | ; |
| 26240            | 19266 |     | 25472 |      |   |
| 2.24230977794246 | 100   | 150 | 0     | Open | ; |
| 26241            | 18878 |     | 25185 |      |   |
| 1.99994447443767 | 100   | 150 | 0     | Open | ; |
| 26242            | 19808 |     | 25564 |      |   |
| 2.00003220039152 | 100   | 150 | 0     | Open | ; |
| 26243            | 18608 |     | 25260 |      |   |
| 1.99998332254012 | 100   | 150 | 0     | Open | ; |
| 26244            | 24987 |     | 25451 |      |   |
| 1.99993260309728 | 100   | 150 | 0     | Open | ; |
| 26245            | 23525 |     | 25631 |      |   |
| 2.00008321951027 | 100   | 150 | 0     | Open | ; |
| 26246            | 19941 |     | 25463 |      |   |
| 9.64283276014422 | 100   | 150 | 0     | Open | ; |
| 26247            | 22236 |     | 25382 |      |   |
| 1.99993490356384 | 100   | 150 | 0     | Open | ; |
| 26248            | 19852 |     | 25628 |      |   |
| 2.00003220023933 | 100   | 150 | 0     | Open | ; |
| 26249            | 19995 |     | 25188 |      |   |
| 1.99998691374215 | 100   | 150 | 0     | Open | ; |
| 26250            | 23294 |     | 25541 |      |   |
| 2.00003219904317 | 100   | 150 | 0     | Open | ; |
| 26251            | 23661 |     | 25646 |      |   |

|                  |       |     |       |      |   |
|------------------|-------|-----|-------|------|---|
| 2.00002267249036 | 100   | 150 | 0     | Open | ; |
| 26252            | 21914 |     | 25580 |      |   |
| 2.00003656897361 | 100   | 150 | 0     | Open | ; |
| 26253            | 22975 |     | 25617 |      |   |
| 2.00003656988216 | 100   | 150 | 0     | Open | ; |
| 26254            | 19942 |     | 25323 |      |   |
| 2.00001793268316 | 100   | 150 | 0     | Open | ; |
| 26255            | 23201 |     | 25348 |      |   |
| 2.00001793307485 | 100   | 150 | 0     | Open | ; |
| 26256            | 21313 |     | 25089 |      |   |
| 1.99993728514273 | 100   | 150 | 0     | Open | ; |
| 26257            | 18476 |     | 25397 |      |   |
| 2.00003747927291 | 100   | 150 | 0     | Open | ; |
| 26258            | 19406 |     | 25241 |      |   |
| 2.00003777038142 | 100   | 150 | 0     | Open | ; |
| 26259            | 24902 |     | 25229 |      |   |
| 2.00003796841235 | 100   | 150 | 0     | Open | ; |
| 26260            | 20428 |     | 25446 |      |   |
| 2.9085250248874  | 100   | 150 | 0     | Open | ; |
| 26261            | 19244 |     | 25415 |      |   |
| 1.99993910328315 | 100   | 150 | 0     | Open | ; |
| 26262            | 24741 |     | 25690 |      |   |
| 2.08057163452377 | 100   | 150 | 0     | Open | ; |
| 26263            | 20983 |     | 25182 |      |   |
| 2.00003897946653 | 100   | 150 | 0     | Open | ; |
| 26264            | 20173 |     | 25410 |      |   |
| 1.99994269351382 | 100   | 150 | 0     | Open | ; |
| 26265            | 23360 |     | 25498 |      |   |
| 1.99994005322385 | 100   | 150 | 0     | Open | ; |
| 26266            | 21767 |     | 25311 |      |   |
| 1.99994000394709 | 100   | 150 | 0     | Open | ; |
| 26267            | 21871 |     | 25503 |      |   |
| 2.00003095289941 | 100   | 150 | 0     | Open | ; |
| 26268            | 19306 |     | 25355 |      |   |
| 2.00003969009136 | 100   | 150 | 0     | Open | ; |
| 26269            | 22057 |     | 25662 |      |   |
| 1.99994079379258 | 100   | 150 | 0     | Open | ; |
| 26270            | 24646 |     | 25590 |      |   |
| 1.99994106389106 | 100   | 150 | 0     | Open | ; |
| 26271            | 23460 |     | 25374 |      |   |
| 2.00004081026121 | 100   | 150 | 0     | Open | ; |
| 26272            | 19925 |     | 25106 |      |   |
| 2.00002906230818 | 100   | 150 | 0     | Open | ; |
| 26273            | 22302 |     | 25481 |      |   |
| 2.00004764148278 | 100   | 150 | 0     | Open | ; |
| 26274            | 18812 |     | 25467 |      |   |
| 1.99994106498608 | 100   | 150 | 0     | Open | ; |
| 26275            | 22882 |     | 25352 |      |   |
| 2.00004163942948 | 100   | 150 | 0     | Open | ; |
| 26276            | 24644 |     | 25582 |      |   |



|                     |       |     |       |      |   |
|---------------------|-------|-----|-------|------|---|
| 2.00004179997939    | 100   | 150 | 0     | Open | ; |
| 26277               | 20739 |     | 25506 |      |   |
| 2.000055792341 100  |       | 150 | 0     | Open | ; |
| 26278               | 25012 |     | 25512 |      |   |
| 2.00003414221778    | 100   | 150 | 0     | Open | ; |
| 26279               | 19813 |     | 25568 |      |   |
| 1.99994338492618    | 100   | 150 | 0     | Open | ; |
| 26280               | 24526 |     | 25663 |      |   |
| 2.00002946157083    | 100   | 150 | 0     | Open | ; |
| 26281               | 19799 |     | 25466 |      |   |
| 1.9999437139212 100 |       | 150 | 0     | Open | ; |
| 26282               | 18714 |     | 25399 |      |   |
| 2.00004415934347    | 100   | 150 | 0     | Open | ; |
| 26283               | 21008 |     | 25491 |      |   |
| 9.86040371277393    | 100   | 150 | 0     | Open | ; |
| 26284               | 21573 |     | 25219 |      |   |
| 1.99994531442725    | 100   | 150 | 0     | Open | ; |
| 26285               | 23323 |     | 25546 |      |   |
| 2.00004536836463    | 100   | 150 | 0     | Open | ; |
| 26286               | 21223 |     | 25269 |      |   |
| 2.00004557004078    | 100   | 150 | 0     | Open | ; |
| 26287               | 20073 |     | 25202 |      |   |
| 2.0000459297962 100 |       | 150 | 0     | Open | ; |
| 26288               | 22935 |     | 25666 |      |   |
| 2.000038611519 100  |       | 150 | 0     | Open | ; |
| 26289               | 22303 |     | 25208 |      |   |
| 2.00006231104682    | 100   | 150 | 0     | Open | ; |
| 26290               | 24715 |     | 25603 |      |   |
| 2.00003663324796    | 100   | 150 | 0     | Open | ; |
| 26291               | 21608 |     | 25608 |      |   |
| 2.00004839851921    | 100   | 150 | 0     | Open | ; |
| 26292               | 19762 |     | 25659 |      |   |
| 1.99995367465869    | 100   | 150 | 0     | Open | ; |
| 26293               | 23227 |     | 25570 |      |   |
| 1.99994972445985    | 100   | 150 | 0     | Open | ; |
| 26294               | 23498 |     | 25131 |      |   |
| 2.000049920479 100  |       | 150 | 0     | Open | ; |
| 26295               | 18645 |     | 25360 |      |   |
| 2.00005020857539    | 100   | 150 | 0     | Open | ; |
| 26296               | 20076 |     | 25626 |      |   |
| 2.00005034058725    | 100   | 150 | 0     | Open | ; |
| 26297               | 22859 |     | 25524 |      |   |
| 2.00002060269667    | 100   | 150 | 0     | Open | ; |
| 26298               | 22709 |     | 25329 |      |   |
| 2.00005084926129    | 100   | 150 | 0     | Open | ; |
| 26299               | 23275 |     | 25087 |      |   |
| 2.00005097893877    | 100   | 150 | 0     | Open | ; |
| 26300               | 22703 |     | 25280 |      |   |
| 2.00005120868832    | 100   | 150 | 0     | Open | ; |
| 26301               | 24534 |     | 25543 |      |   |

|                  |       |     |       |      |   |
|------------------|-------|-----|-------|------|---|
| 2.0000515391391  | 100   | 150 | 0     | Open | ; |
| 26302            | 24882 |     | 25702 |      |   |
| 1.99998151350521 | 100   | 150 | 0     | Open | ; |
| 26303            | 21058 |     | 25328 |      |   |
| 2.00005168899685 | 100   | 150 | 0     | Open | ; |
| 26304            | 23384 |     | 25193 |      |   |
| 2.00001801338946 | 100   | 150 | 0     | Open | ; |
| 26305            | 21144 |     | 25212 |      |   |
| 2.00005184040335 | 100   | 150 | 0     | Open | ; |
| 26306            | 20317 |     | 25302 |      |   |
| 1.99995454504474 | 100   | 150 | 0     | Open | ; |
| 26307            | 19500 |     | 25307 |      |   |
| 2.00005394030462 | 100   | 150 | 0     | Open | ; |
| 26308            | 19861 |     | 25092 |      |   |
| 2.00005411941085 | 100   | 150 | 0     | Open | ; |
| 26309            | 19803 |     | 25437 |      |   |
| 2.00004059160153 | 100   | 150 | 0     | Open | ; |
| 26310            | 23000 |     | 25490 |      |   |
| 9.63571276711943 | 100   | 150 | 0     | Open | ; |
| 26311            | 21774 |     | 25537 |      |   |
| 1.99995583463574 | 100   | 150 | 0     | Open | ; |
| 26312            | 23573 |     | 25388 |      |   |
| 2.00005535959361 | 100   | 150 | 0     | Open | ; |
| 26313            | 22643 |     | 25361 |      |   |
| 2.0000560792649  | 100   | 150 | 0     | Open | ; |
| 26314            | 24598 |     | 24599 |      |   |
| 2.00001526290159 | 250   | 140 | 0     | Open | ; |
| 26315            | 18733 |     | 19898 |      |   |
| 2.00001530296149 | 140   | 150 | 0     | Open | ; |
| 26316            | 19456 |     | 20972 |      |   |
| 2.0000143391052  | 110   | 150 | 0     | Open | ; |
| 26317            | 19457 |     | 20976 |      |   |
| 2.00001434015858 | 110   | 150 | 0     | Open | ; |
| 26318            | 22082 |     | 22795 |      |   |
| 2.000015392102   | 250   | 150 | 0     | Open | ; |
| 26319            | 21302 |     | 19666 |      |   |
| 2.00001545902852 | 250   | 100 | 0     | Open | ; |
| 26320            | 21212 |     | 18802 |      |   |
| 2.00001557021385 | 125   | 150 | 0     | Open | ; |
| 26321            | 19830 |     | 19828 |      |   |
| 2.00001461230014 | 200   | 150 | 0     | Open | ; |
| 26322            | 21089 |     | 21298 |      |   |
| 2.00001463329812 | 200   | 150 | 0     | Open | ; |
| 26323            | 20136 |     | 20928 |      |   |
| 2.00001564974987 | 100   | 140 | 0     | Open | ; |
| 26324            | 22318 |     | 19431 |      |   |
| 2.00001568503178 | 140   | 150 | 0     | Open | ; |
| 26325            | 20120 |     | 24543 |      |   |
| 2.00001570416492 | 200   | 150 | 0     | Open | ; |
| 26326            | 20735 |     | 19319 |      |   |

|                     |       |     |       |      |   |
|---------------------|-------|-----|-------|------|---|
| 2.00001570455051    | 140   | 150 | 0     | Open | ; |
| 26327               | 22443 |     | 22444 |      |   |
| 2.0000157054479 110 |       | 150 | 0     | Open | ; |
| 26328               | 21010 |     | 23928 |      |   |
| 2.00001478235155    | 100   | 140 | 0     | Open | ; |
| 26329               | 18598 |     | 23510 |      |   |
| 2.00001580486174    | 150   | 140 | 0     | Open | ; |
| 26330               | 19359 |     | 21409 |      |   |
| 2.00001583234678    | 150   | 140 | 0     | Open | ; |
| 26331               | 24071 |     | 23686 |      |   |
| 2.00001586246077    | 200   | 140 | 0     | Open | ; |
| 26332               | 21656 |     | 21757 |      |   |
| 2.00001592522438    | 110   | 150 | 0     | Open | ; |
| 26333               | 19219 |     | 19220 |      |   |
| 2.00001592986331    | 110   | 150 | 0     | Open | ; |
| 26334               | 19342 |     | 23597 |      |   |
| 2.00001595166647    | 100   | 140 | 0     | Open | ; |
| 26335               | 24386 |     | 21827 |      |   |
| 2.00001599994027    | 100   | 140 | 0     | Open | ; |
| 26336               | 21416 |     | 23495 |      |   |
| 2.00001601889406    | 100   | 140 | 0     | Open | ; |
| 26337               | 20354 |     | 21587 |      |   |
| 2.00001604303145    | 140   | 150 | 0     | Open | ; |
| 26338               | 19834 |     | 19337 |      |   |
| 2.00001606451611    | 100   | 140 | 0     | Open | ; |
| 26339               | 24144 |     | 18767 |      |   |
| 2.00001610050124    | 250   | 140 | 0     | Open | ; |
| 26340               | 18972 |     | 18973 |      |   |
| 2.00001611239731    | 150   | 140 | 0     | Open | ; |
| 26341               | 22013 |     | 22014 |      |   |
| 2.00001623195342    | 125   | 150 | 0     | Open | ; |
| 26342               | 22911 |     | 19781 |      |   |
| 2.00001624504935    | 100   | 140 | 0     | Open | ; |
| 26343               | 20642 |     | 24541 |      |   |
| 2.00001628241387    | 200   | 150 | 0     | Open | ; |
| 26344               | 20054 |     | 20055 |      |   |
| 2.00001530224475    | 200   | 150 | 0     | Open | ; |
| 26345               | 19508 |     | 20195 |      |   |
| 2.00001630223017    | 150   | 140 | 0     | Open | ; |
| 26346               | 20581 |     | 20582 |      |   |
| 2.0000163050164 140 |       | 150 | 0     | Open | ; |
| 26347               | 21562 |     | 23830 |      |   |
| 2.00001433909295    | 110   | 150 | 0     | Open | ; |
| 26348               | 20047 |     | 20049 |      |   |
| 2.00001640249096    | 140   | 150 | 0     | Open | ; |
| 26349               | 22589 |     | 22681 |      |   |
| 2.00001641981319    | 100   | 140 | 0     | Open | ; |
| 26350               | 23223 |     | 20981 |      |   |
| 2.00001642051072    | 100   | 140 | 0     | Open | ; |
| 26351               | 20211 |     | 24313 |      |   |

|                     |       |     |       |      |   |
|---------------------|-------|-----|-------|------|---|
| 2.00001650015684    | 200   | 140 | 0     | Open | ; |
| 26352               | 23772 |     | 23781 |      |   |
| 2.00001667241568    | 100   | 140 | 0     | Open | ; |
| 26353               | 19027 |     | 19662 |      |   |
| 2.00001570466698    | 100   | 140 | 0     | Open | ; |
| 26354               | 20014 |     | 21037 |      |   |
| 2.00001691192532    | 450   | 100 | 0     | Open | ; |
| 26355               | 20436 |     | 24319 |      |   |
| 2.00001700541621    | 200   | 140 | 0     | Open | ; |
| 26356               | 20805 |     | 20806 |      |   |
| 2.00001715969332    | 160   | 150 | 0     | Open | ; |
| 26357               | 22863 |     | 21891 |      |   |
| 2.00001716292588    | 200   | 140 | 0     | Open | ; |
| 26358               | 24084 |     | 20548 |      |   |
| 2.00001722293097    | 110   | 150 | 0     | Open | ; |
| 26359               | 22013 |     | 22015 |      |   |
| 2.00001623195342    | 125   | 150 | 0     | Open | ; |
| 26360               | 20754 |     | 23290 |      |   |
| 2.0000172429348 160 |       | 150 | 0     | Open | ; |
| 26361               | 21078 |     | 21079 |      |   |
| 2.00001728257339    | 150   | 140 | 0     | Open | ; |
| 26362               | 21448 |     | 21393 |      |   |
| 2.00001630258652    | 100   | 140 | 0     | Open | ; |
| 26363               | 18589 |     | 22616 |      |   |
| 2.0000175126398 125 |       | 150 | 0     | Open | ; |
| 26364               | 18840 |     | 18842 |      |   |
| 2.0000176125176 110 |       | 150 | 0     | Open | ; |
| 26365               | 24208 |     | 24209 |      |   |
| 2.00001764951633    | 250   | 140 | 0     | Open | ; |
| 26366               | 24187 |     | 24189 |      |   |
| 2.00001769180971    | 250   | 100 | 0     | Open | ; |
| 26367               | 24029 |     | 18669 |      |   |
| 2.00001785042669    | 160   | 150 | 0     | Open | ; |
| 26368               | 18903 |     | 18904 |      |   |
| 2.00001785019151    | 110   | 150 | 0     | Open | ; |
| 26369               | 20450 |     | 19713 |      |   |
| 2.00001791212047    | 160   | 150 | 0     | Open | ; |
| 26370               | 20125 |     | 24061 |      |   |
| 2.000018045371 150  |       | 140 | 0     | Open | ; |
| 26371               | 22539 |     | 22597 |      |   |
| 2.00001804552549    | 160   | 150 | 0     | Open | ; |
| 26372               | 18482 |     | 18483 |      |   |
| 2.0000181525177 110 |       | 150 | 0     | Open | ; |
| 26373               | 21195 |     | 21193 |      |   |
| 2.00001824181055    | 100   | 140 | 0     | Open | ; |
| 26374               | 24018 |     | 24116 |      |   |
| 2.00001829288286    | 110   | 150 | 0     | Open | ; |
| 26375               | 22932 |     | 22939 |      |   |
| 2.00001836171752    | 110   | 150 | 0     | Open | ; |
| 26376               | 21085 |     | 21086 |      |   |

|                     |       |       |      |        |
|---------------------|-------|-------|------|--------|
| 2.0000183698478 110 | 150   | 0     | Open | ;      |
| 26377               | 19527 | 19644 |      |        |
| 2.00001836988 110   | 150   | 0     | Open | ;      |
| 26378               | 22914 | 24292 |      |        |
| 2.00001846163228    | 125   | 140   | 0    | Open ; |
| 26379               | 19536 | 19492 |      |        |
| 2.00001846249967    | 125   | 140   | 0    | Open ; |
| 26380               | 22123 | 20445 |      |        |
| 2.00001853208404    | 150   | 140   | 0    | Open ; |
| 26381               | 21436 | 23413 |      |        |
| 2.00001862486793    | 125   | 140   | 0    | Open ; |
| 26382               | 24347 | 21984 |      |        |
| 2.00001862502269    | 125   | 150   | 0    | Open ; |
| 26383               | 21102 | 23624 |      |        |
| 2.00001862525287    | 400   | 130   | 0    | Open ; |
| 26384               | 19905 | 22119 |      |        |
| 2.00001863165426    | 100   | 140   | 0    | Open ; |
| 26385               | 21446 | 21419 |      |        |
| 2.00001868277483    | 160   | 150   | 0    | Open ; |
| 26386               | 19564 | 19565 |      |        |
| 2.00001880196642    | 160   | 150   | 0    | Open ; |
| 26387               | 18865 | 19183 |      |        |
| 2.00001881221054    | 100   | 140   | 0    | Open ; |
| 26388               | 23096 | 23408 |      |        |
| 2.00001882515782    | 140   | 150   | 0    | Open ; |
| 26389               | 22917 | 20137 |      |        |
| 2.00001883226956    | 100   | 140   | 0    | Open ; |
| 26390               | 23295 | 24010 |      |        |
| 2.0000188319669 110 | 150   | 0     | Open | ;      |
| 26391               | 20255 | 20256 |      |        |
| 2.00001889258453    | 250   | 140   | 0    | Open ; |
| 26392               | 21103 | 20263 |      |        |
| 2.00001892241619    | 400   | 130   | 0    | Open ; |
| 26393               | 20003 | 20004 |      |        |
| 2.00001904248004    | 150   | 140   | 0    | Open ; |
| 26394               | 24127 | 24128 |      |        |
| 2.00001905068436    | 200   | 140   | 0    | Open ; |
| 26395               | 22008 | 21150 |      |        |
| 2.00001908263273    | 140   | 150   | 0    | Open ; |
| 26396               | 23024 | 23124 |      |        |
| 2.00001923200594    | 100   | 100   | 0    | Open ; |
| 26397               | 22635 | 22759 |      |        |
| 2.00001923301703    | 250   | 150   | 0    | Open ; |
| 26398               | 18621 | 18623 |      |        |
| 2.00001935978911    | 150   | 140   | 0    | Open ; |
| 26399               | 23253 | 19389 |      |        |
| 2.00001837098258    | 110   | 150   | 0    | Open ; |
| 26400               | 24371 | 18516 |      |        |
| 2.00001938162847    | 110   | 150   | 0    | Open ; |
| 26401               | 23452 | 24288 |      |        |

|                     |       |     |       |      |   |
|---------------------|-------|-----|-------|------|---|
| 2.00001938232742    | 160   | 150 | 0     | Open | ; |
| 26402               | 21561 |     | 24147 |      |   |
| 2.00001956221397    | 125   | 140 | 0     | Open | ; |
| 26403               | 19511 |     | 19835 |      |   |
| 2.00001956257959    | 100   | 140 | 0     | Open | ; |
| 26404               | 19854 |     | 19907 |      |   |
| 2.0000196051705 200 |       | 150 | 0     | Open | ; |
| 26405               | 19725 |     | 18844 |      |   |
| 2.00001961957331    | 100   | 140 | 0     | Open | ; |
| 26406               | 19014 |     | 19015 |      |   |
| 2.00001983308498    | 125   | 150 | 0     | Open | ; |
| 26407               | 20065 |     | 22213 |      |   |
| 2.00001985198539    | 125   | 140 | 0     | Open | ; |
| 26408               | 20102 |     | 21104 |      |   |
| 2.00001908256082    | 100   | 140 | 0     | Open | ; |
| 26409               | 20179 |     | 22371 |      |   |
| 2.00002017350461    | 160   | 150 | 0     | Open | ; |
| 26410               | 22517 |     | 22519 |      |   |
| 2.00002018193168    | 100   | 140 | 0     | Open | ; |
| 26411               | 18969 |     | 18971 |      |   |
| 2.00002018203074    | 100   | 140 | 0     | Open | ; |
| 26412               | 21385 |     | 19362 |      |   |
| 2.00002019949966    | 160   | 150 | 0     | Open | ; |
| 26413               | 19313 |     | 21023 |      |   |
| 2.00002019981647    | 160   | 150 | 0     | Open | ; |
| 26414               | 21020 |     | 20646 |      |   |
| 2.0000202121924 100 |       | 140 | 0     | Open | ; |
| 26415               | 24324 |     | 23891 |      |   |
| 2.00002023942803    | 100   | 140 | 0     | Open | ; |
| 26416               | 22835 |     | 19257 |      |   |
| 2.00002023986762    | 110   | 150 | 0     | Open | ; |
| 26417               | 19245 |     | 19322 |      |   |
| 2.00002024051357    | 100   | 100 | 0     | Open | ; |
| 26418               | 23342 |     | 19376 |      |   |
| 2.00002032939992    | 100   | 140 | 0     | Open | ; |
| 26419               | 19874 |     | 21036 |      |   |
| 2.00002042393986    | 110   | 150 | 0     | Open | ; |
| 26420               | 22187 |     | 22188 |      |   |
| 2.00002090252216    | 150   | 140 | 0     | Open | ; |
| 26421               | 24375 |     | 24376 |      |   |
| 2.00002092530556    | 125   | 150 | 0     | Open | ; |
| 26422               | 22825 |     | 22826 |      |   |
| 2.00002097000218    | 100   | 140 | 0     | Open | ; |
| 26423               | 21662 |     | 19552 |      |   |
| 2.0000210025463 250 |       | 140 | 0     | Open | ; |
| 26424               | 19401 |     | 18680 |      |   |
| 2.00002105204554    | 160   | 150 | 0     | Open | ; |
| 26425               | 22146 |     | 20730 |      |   |
| 2.0000210525991 125 |       | 150 | 0     | Open | ; |
| 26426               | 22696 |     | 22695 |      |   |

|                     |       |     |       |      |   |
|---------------------|-------|-----|-------|------|---|
| 2.00001908256082    | 100   | 140 | 0     | Open | ; |
| 26427               | 24221 |     | 23622 |      |   |
| 2.00002134296398    | 125   | 140 | 0     | Open | ; |
| 26428               | 19288 |     | 24388 |      |   |
| 2.00002140513321    | 110   | 150 | 0     | Open | ; |
| 26429               | 23057 |     | 23713 |      |   |
| 2.00002144482925    | 100   | 140 | 0     | Open | ; |
| 26430               | 18922 |     | 24173 |      |   |
| 2.00002150233079    | 100   | 140 | 0     | Open | ; |
| 26431               | 21550 |     | 18778 |      |   |
| 2.00002152475881    | 160   | 150 | 0     | Open | ; |
| 26432               | 21993 |     | 18817 |      |   |
| 2.00002157003354    | 125   | 150 | 0     | Open | ; |
| 26433               | 21237 |     | 21753 |      |   |
| 2.00002160290743    | 110   | 150 | 0     | Open | ; |
| 26434               | 24164 |     | 23266 |      |   |
| 2.00002162555393    | 140   | 150 | 0     | Open | ; |
| 26435               | 21111 |     | 24037 |      |   |
| 2.0000217041197 160 |       | 150 | 0     | Open | ; |
| 26436               | 23903 |     | 24194 |      |   |
| 2.00002174227368    | 100   | 140 | 0     | Open | ; |
| 26437               | 22146 |     | 20729 |      |   |
| 2.00002174526353    | 125   | 150 | 0     | Open | ; |
| 26438               | 19404 |     | 19242 |      |   |
| 2.00002186192519    | 100   | 140 | 0     | Open | ; |
| 26439               | 22171 |     | 20262 |      |   |
| 2.00002186293936    | 450   | 130 | 0     | Open | ; |
| 26440               | 24106 |     | 23080 |      |   |
| 2.00002192087554    | 100   | 140 | 0     | Open | ; |
| 26441               | 19764 |     | 24353 |      |   |
| 2.00002193978363    | 200   | 150 | 0     | Open | ; |
| 26442               | 22812 |     | 22813 |      |   |
| 2.00002195228466    | 160   | 150 | 0     | Open | ; |
| 26443               | 18898 |     | 18899 |      |   |
| 2.00002212038876    | 160   | 150 | 0     | Open | ; |
| 26444               | 20590 |     | 20591 |      |   |
| 2.00002228455082    | 140   | 150 | 0     | Open | ; |
| 26445               | 23545 |     | 24067 |      |   |
| 2.00002250289001    | 150   | 140 | 0     | Open | ; |
| 26446               | 18488 |     | 18490 |      |   |
| 2.00002256283599    | 100   | 140 | 0     | Open | ; |
| 26447               | 22002 |     | 22004 |      |   |
| 2.00002256243718    | 150   | 140 | 0     | Open | ; |
| 26448               | 21046 |     | 20897 |      |   |
| 2.00002259986714    | 100   | 140 | 0     | Open | ; |
| 26449               | 24106 |     | 23803 |      |   |
| 2.00002261291622    | 100   | 140 | 0     | Open | ; |
| 26450               | 23299 |     | 21423 |      |   |
| 2.00002286239785    | 160   | 150 | 0     | Open | ; |
| 26451               | 19042 |     | 19043 |      |   |

|                  |       |     |       |      |   |
|------------------|-------|-----|-------|------|---|
| 2.00002289298018 | 100   | 140 | 0     | Open | ; |
| 26452            | 20833 |     | 20834 |      |   |
| 2.00002290065923 | 150   | 140 | 0     | Open | ; |
| 26453            | 19991 |     | 18873 |      |   |
| 2.00002291291919 | 200   | 100 | 0     | Open | ; |
| 26454            | 22816 |     | 22817 |      |   |
| 2.00002294486527 | 110   | 150 | 0     | Open | ; |
| 26455            | 22039 |     | 22868 |      |   |
| 2.00002300228102 | 110   | 150 | 0     | Open | ; |
| 26456            | 18488 |     | 18489 |      |   |
| 2.00002306458718 | 100   | 140 | 0     | Open | ; |
| 26457            | 21250 |     | 21692 |      |   |
| 2.00002308456694 | 160   | 150 | 0     | Open | ; |
| 26458            | 19029 |     | 19669 |      |   |
| 2.00002308589303 | 200   | 150 | 0     | Open | ; |
| 26459            | 20599 |     | 20600 |      |   |
| 2.00002312313129 | 100   | 140 | 0     | Open | ; |
| 26460            | 21333 |     | 19543 |      |   |
| 2.00002324212155 | 125   | 150 | 0     | Open | ; |
| 26461            | 19064 |     | 19065 |      |   |
| 2.00002331219596 | 140   | 150 | 0     | Open | ; |
| 26462            | 18975 |     | 18976 |      |   |
| 2.00002340234954 | 100   | 140 | 0     | Open | ; |
| 26463            | 20825 |     | 20826 |      |   |
| 2.00002340265995 | 150   | 140 | 0     | Open | ; |
| 26464            | 18735 |     | 18736 |      |   |
| 2.00002345161588 | 110   | 150 | 0     | Open | ; |
| 26465            | 22181 |     | 22182 |      |   |
| 2.00002351462992 | 300   | 140 | 0     | Open | ; |
| 26466            | 22679 |     | 22680 |      |   |
| 2.00002352255448 | 160   | 150 | 0     | Open | ; |
| 26467            | 19340 |     | 19689 |      |   |
| 2.00002256226332 | 125   | 140 | 0     | Open | ; |
| 26468            | 23047 |     | 23046 |      |   |
| 2.00002356575579 | 100   | 140 | 0     | Open | ; |
| 26469            | 21892 |     | 23727 |      |   |
| 2.00002357174374 | 125   | 140 | 0     | Open | ; |
| 26470            | 19991 |     | 20461 |      |   |
| 2.00002357211535 | 200   | 100 | 0     | Open | ; |
| 26471            | 24105 |     | 23698 |      |   |
| 2.00002365112316 | 110   | 150 | 0     | Open | ; |
| 26472            | 22169 |     | 24228 |      |   |
| 2.00002372585918 | 140   | 150 | 0     | Open | ; |
| 26473            | 19921 |     | 23853 |      |   |
| 2.00002377243619 | 200   | 140 | 0     | Open | ; |
| 26474            | 22595 |     | 22596 |      |   |
| 2.00002393260253 | 140   | 150 | 0     | Open | ; |
| 26475            | 21673 |     | 21916 |      |   |
| 2.00002393268287 | 110   | 150 | 0     | Open | ; |
| 26476            | 22805 |     | 24248 |      |   |



|                     |       |     |       |      |   |
|---------------------|-------|-----|-------|------|---|
| 2.0000239853882 100 |       | 140 | 0     | Open | ; |
| 26477               | 23650 |     | 20862 |      |   |
| 2.00002402283961    | 100   | 140 | 0     | Open | ; |
| 26478               | 20339 |     | 24108 |      |   |
| 2.00002414461266    | 200   | 150 | 0     | Open | ; |
| 26479               | 22130 |     | 20504 |      |   |
| 2.00002422474065    | 100   | 140 | 0     | Open | ; |
| 26480               | 22568 |     | 22569 |      |   |
| 2.00002424971702    | 160   | 150 | 0     | Open | ; |
| 26481               | 22517 |     | 22518 |      |   |
| 2.00002428980147    | 100   | 140 | 0     | Open | ; |
| 26482               | 20007 |     | 18825 |      |   |
| 2.00002433268969    | 160   | 150 | 0     | Open | ; |
| 26483               | 20816 |     | 20131 |      |   |
| 2.00002439977919    | 110   | 150 | 0     | Open | ; |
| 26484               | 22090 |     | 20815 |      |   |
| 2.00002439941913    | 200   | 150 | 0     | Open | ; |
| 26485               | 20299 |     | 22558 |      |   |
| 2.00002439977919    | 110   | 150 | 0     | Open | ; |
| 26486               | 19626 |     | 19627 |      |   |
| 2.0000243999572 110 |       | 150 | 0     | Open | ; |
| 26487               | 20592 |     | 20176 |      |   |
| 2.00002442162078    | 125   | 150 | 0     | Open | ; |
| 26488               | 23499 |     | 21718 |      |   |
| 2.00002454245059    | 160   | 150 | 0     | Open | ; |
| 26489               | 24343 |     | 21996 |      |   |
| 2.00002472973209    | 110   | 150 | 0     | Open | ; |
| 26490               | 23841 |     | 21765 |      |   |
| 2.00002477140015    | 300   | 140 | 0     | Open | ; |
| 26491               | 18958 |     | 20284 |      |   |
| 2.00002492244138    | 110   | 150 | 0     | Open | ; |
| 26492               | 23096 |     | 23798 |      |   |
| 2.00002496181417    | 140   | 150 | 0     | Open | ; |
| 26493               | 20033 |     | 20034 |      |   |
| 2.00002500014297    | 150   | 140 | 0     | Open | ; |
| 26494               | 20419 |     | 20420 |      |   |
| 2.00002511260634    | 160   | 150 | 0     | Open | ; |
| 26495               | 20690 |     | 20691 |      |   |
| 2.00002517272192    | 110   | 150 | 0     | Open | ; |
| 26496               | 22718 |     | 24136 |      |   |
| 2.00002521205922    | 200   | 140 | 0     | Open | ; |
| 26497               | 24538 |     | 19491 |      |   |
| 2.00002422485671    | 110   | 150 | 0     | Open | ; |
| 26498               | 19107 |     | 24192 |      |   |
| 2.00002534162335    | 140   | 150 | 0     | Open | ; |
| 26499               | 20797 |     | 20798 |      |   |
| 2.00002535157404    | 160   | 150 | 0     | Open | ; |
| 26500               | 22836 |     | 22837 |      |   |
| 2.00002535147122    | 100   | 140 | 0     | Open | ; |
| 26501               | 21519 |     | 21521 |      |   |

|                     |       |     |       |      |   |
|---------------------|-------|-----|-------|------|---|
| 2.00002535937658    | 160   | 150 | 0     | Open | ; |
| 26502               | 19632 |     | 22506 |      |   |
| 2.0000243986635 140 |       | 150 | 0     | Open | ; |
| 26503               | 19599 |     | 19600 |      |   |
| 2.00002439924303    | 160   | 150 | 0     | Open | ; |
| 26504               | 19591 |     | 19592 |      |   |
| 2.00002440011466    | 110   | 150 | 0     | Open | ; |
| 26505               | 22268 |     | 22270 |      |   |
| 2.0000244003605 140 |       | 150 | 0     | Open | ; |
| 26506               | 20325 |     | 20326 |      |   |
| 2.00002541007989    | 125   | 150 | 0     | Open | ; |
| 26507               | 20355 |     | 21953 |      |   |
| 2.0000255017105 110 |       | 150 | 0     | Open | ; |
| 26508               | 18643 |     | 24190 |      |   |
| 2.00002554436114    | 250   | 140 | 0     | Open | ; |
| 26509               | 21000 |     | 22044 |      |   |
| 2.00002560466617    | 200   | 150 | 0     | Open | ; |
| 26510               | 18832 |     | 20005 |      |   |
| 2.00002582620218    | 200   | 150 | 0     | Open | ; |
| 26511               | 18563 |     | 24207 |      |   |
| 2.00002588993738    | 200   | 150 | 0     | Open | ; |
| 26512               | 19774 |     | 22105 |      |   |
| 2.00002590549458    | 160   | 150 | 0     | Open | ; |
| 26513               | 22787 |     | 22788 |      |   |
| 2.00002606213075    | 110   | 150 | 0     | Open | ; |
| 26514               | 20170 |     | 20169 |      |   |
| 2.00002606341547    | 110   | 150 | 0     | Open | ; |
| 26515               | 23930 |     | 23933 |      |   |
| 2.00002612940028    | 100   | 140 | 0     | Open | ; |
| 26516               | 21638 |     | 21640 |      |   |
| 2.00002624920724    | 160   | 150 | 0     | Open | ; |
| 26517               | 19568 |     | 19569 |      |   |
| 2.00002625043319    | 125   | 130 | 0     | Open | ; |
| 26518               | 23383 |     | 23381 |      |   |
| 2.00002625006369    | 110   | 150 | 0     | Open | ; |
| 26519               | 19618 |     | 19619 |      |   |
| 2.00002439941913    | 110   | 150 | 0     | Open | ; |
| 26520               | 22339 |     | 22340 |      |   |
| 2.00002439977919    | 110   | 150 | 0     | Open | ; |
| 26521               | 19684 |     | 19685 |      |   |
| 2.00002439995061    | 110   | 150 | 0     | Open | ; |
| 26522               | 19651 |     | 21108 |      |   |
| 2.00002550284596    | 160   | 150 | 0     | Open | ; |
| 26523               | 21110 |     | 21109 |      |   |
| 2.00002652169546    | 160   | 150 | 0     | Open | ; |
| 26524               | 22831 |     | 22832 |      |   |
| 2.00002560484657    | 300   | 140 | 0     | Open | ; |
| 26525               | 22471 |     | 20205 |      |   |
| 2.00002661221194    | 100   | 140 | 0     | Open | ; |
| 26526               | 22470 |     | 23805 |      |   |

|                  |       |     |       |      |   |
|------------------|-------|-----|-------|------|---|
| 2.00002661238084 | 100   | 140 | 0     | Open | ; |
| 26527            | 21818 |     | 21127 |      |   |
| 2.00002678405755 | 250   | 140 | 0     | Open | ; |
| 26528            | 21096 |     | 21476 |      |   |
| 2.00002678437721 | 160   | 150 | 0     | Open | ; |
| 26529            | 22829 |     | 21312 |      |   |
| 2.00002679172146 | 160   | 150 | 0     | Open | ; |
| 26530            | 21609 |     | 22754 |      |   |
| 2.00002679263913 | 150   | 140 | 0     | Open | ; |
| 26531            | 20844 |     | 24184 |      |   |
| 2.00002682274444 | 100   | 140 | 0     | Open | ; |
| 26532            | 19060 |     | 19061 |      |   |
| 2.00002685210542 | 140   | 150 | 0     | Open | ; |
| 26533            | 21014 |     | 21015 |      |   |
| 2.00002688142952 | 110   | 150 | 0     | Open | ; |
| 26534            | 23395 |     | 23849 |      |   |
| 2.00002688227317 | 110   | 150 | 0     | Open | ; |
| 26535            | 24390 |     | 23659 |      |   |
| 2.00002690061958 | 300   | 140 | 0     | Open | ; |
| 26536            | 23359 |     | 24156 |      |   |
| 2.00002590436456 | 125   | 130 | 0     | Open | ; |
| 26537            | 20024 |     | 20025 |      |   |
| 2.00002693321853 | 110   | 150 | 0     | Open | ; |
| 26538            | 22808 |     | 23676 |      |   |
| 2.00002700145934 | 200   | 150 | 0     | Open | ; |
| 26539            | 23755 |     | 19193 |      |   |
| 2.000027010694   | 150   | 140 | 0     | Open | ; |
| 26540            | 22061 |     | 23098 |      |   |
| 2.00002712526168 | 250   | 100 | 0     | Open | ; |
| 26541            | 20719 |     | 20720 |      |   |
| 2.00002716890636 | 300   | 140 | 0     | Open | ; |
| 26542            | 20833 |     | 22283 |      |   |
| 2.00002716979401 | 150   | 140 | 0     | Open | ; |
| 26543            | 20400 |     | 20401 |      |   |
| 2.00002723241969 | 160   | 150 | 0     | Open | ; |
| 26544            | 21040 |     | 21041 |      |   |
| 2.00002727941842 | 125   | 140 | 0     | Open | ; |
| 26545            | 19364 |     | 24345 |      |   |
| 2.00002727941842 | 160   | 150 | 0     | Open | ; |
| 26546            | 19928 |     | 18702 |      |   |
| 2.0000273052445  | 110   | 150 | 0     | Open | ; |
| 26547            | 19190 |     | 22155 |      |   |
| 2.00002734534672 | 200   | 150 | 0     | Open | ; |
| 26548            | 20289 |     | 20290 |      |   |
| 2.00002734456565 | 110   | 150 | 0     | Open | ; |
| 26549            | 20628 |     | 22360 |      |   |
| 2.00002439995061 | 110   | 150 | 0     | Open | ; |
| 26550            | 20396 |     | 20397 |      |   |
| 2.00002440014953 | 140   | 150 | 0     | Open | ; |
| 26551            | 20298 |     | 22557 |      |   |

|                     |       |     |       |      |   |
|---------------------|-------|-----|-------|------|---|
| 2.0000244010663 110 |       | 150 | 0     | Open | ; |
| 26552               | 18918 |     | 18921 |      |   |
| 2.00002742294228    | 300   | 140 | 0     | Open | ; |
| 26553               | 19686 |     | 19687 |      |   |
| 2.00002766277012    | 160   | 150 | 0     | Open | ; |
| 26554               | 21016 |     | 21017 |      |   |
| 2.00002785003941    | 160   | 150 | 0     | Open | ; |
| 26555               | 21002 |     | 23517 |      |   |
| 2.00002786171519    | 200   | 150 | 0     | Open | ; |
| 26556               | 19712 |     | 20718 |      |   |
| 2.0000278618392 300 |       | 140 | 0     | Open | ; |
| 26557               | 20498 |     | 20499 |      |   |
| 2.00002688244656    | 200   | 140 | 0     | Open | ; |
| 26558               | 20652 |     | 20957 |      |   |
| 2.00002800290888    | 125   | 150 | 0     | Open | ; |
| 26559               | 21855 |     | 22800 |      |   |
| 2.00002805206801    | 125   | 140 | 0     | Open | ; |
| 26560               | 20737 |     | 21781 |      |   |
| 2.0000280529853 100 |       | 100 | 0     | Open | ; |
| 26561               | 20913 |     | 20914 |      |   |
| 2.00002811257426    | 500   | 130 | 0     | Open | ; |
| 26562               | 22376 |     | 22441 |      |   |
| 2.00002827293955    | 200   | 150 | 0     | Open | ; |
| 26563               | 23379 |     | 18911 |      |   |
| 2.00002828984092    | 140   | 150 | 0     | Open | ; |
| 26564               | 20813 |     | 20814 |      |   |
| 2.00002439883491    | 110   | 150 | 0     | Open | ; |
| 26565               | 20749 |     | 22448 |      |   |
| 2.0000244010663 250 |       | 150 | 0     | Open | ; |
| 26566               | 18616 |     | 18618 |      |   |
| 2.00002846162738    | 150   | 140 | 0     | Open | ; |
| 26567               | 23359 |     | 20197 |      |   |
| 2.00002876279803    | 125   | 130 | 0     | Open | ; |
| 26568               | 19088 |     | 23053 |      |   |
| 2.0000287712548 125 |       | 150 | 0     | Open | ; |
| 26569               | 24096 |     | 24097 |      |   |
| 2.00002877245723    | 250   | 150 | 0     | Open | ; |
| 26570               | 24833 |     | 24834 |      |   |
| 2.00002882491287    | 140   | 150 | 0     | Open | ; |
| 26571               | 18523 |     | 24384 |      |   |
| 2.00002886223874    | 200   | 150 | 0     | Open | ; |
| 26572               | 18853 |     | 18854 |      |   |
| 2.00002891269891    | 160   | 150 | 0     | Open | ; |
| 26573               | 20480 |     | 20481 |      |   |
| 2.00002800181884    | 125   | 150 | 0     | Open | ; |
| 26574               | 24043 |     | 24044 |      |   |
| 2.00002906122773    | 125   | 150 | 0     | Open | ; |
| 26575               | 22591 |     | 20745 |      |   |
| 2.00002906146561    | 125   | 150 | 0     | Open | ; |
| 26576               | 18975 |     | 18977 |      |   |

|                     |       |     |       |      |   |
|---------------------|-------|-----|-------|------|---|
| 2.0000291622309 100 |       | 140 | 0     | Open | ; |
| 26577               | 21963 |     | 24389 |      |   |
| 2.00002932386637    | 150   | 140 | 0     | Open | ; |
| 26578               | 23021 |     | 23792 |      |   |
| 2.00002932944861    | 100   | 140 | 0     | Open | ; |
| 26579               | 21684 |     | 18769 |      |   |
| 2.00002933058327    | 100   | 140 | 0     | Open | ; |
| 26580               | 19613 |     | 19614 |      |   |
| 2.00002936585644    | 125   | 150 | 0     | Open | ; |
| 26581               | 22206 |     | 22088 |      |   |
| 2.00002439941913    | 200   | 150 | 0     | Open | ; |
| 26582               | 21623 |     | 20464 |      |   |
| 2.0000244003605 160 |       | 150 | 0     | Open | ; |
| 26583               | 22851 |     | 22852 |      |   |
| 2.00002942515162    | 100   | 140 | 0     | Open | ; |
| 26584               | 19044 |     | 19045 |      |   |
| 2.00002950513436    | 100   | 140 | 0     | Open | ; |
| 26585               | 23199 |     | 23198 |      |   |
| 2.00002953250065    | 125   | 150 | 0     | Open | ; |
| 26586               | 19790 |     | 18515 |      |   |
| 2.00002973002773    | 150   | 140 | 0     | Open | ; |
| 26587               | 23655 |     | 23773 |      |   |
| 2.00002982519176    | 200   | 150 | 0     | Open | ; |
| 26588               | 21241 |     | 22234 |      |   |
| 2.00002991189653    | 160   | 150 | 0     | Open | ; |
| 26589               | 20875 |     | 23692 |      |   |
| 2.00002996973126    | 200   | 150 | 0     | Open | ; |
| 26590               | 18915 |     | 24171 |      |   |
| 2.00003017244148    | 250   | 140 | 0     | Open | ; |
| 26591               | 18505 |     | 18506 |      |   |
| 2.0000301727498 110 |       | 150 | 0     | Open | ; |
| 26592               | 24140 |     | 22424 |      |   |
| 2.00003026292634    | 150   | 140 | 0     | Open | ; |
| 26593               | 21736 |     | 20213 |      |   |
| 2.00003026416396    | 100   | 140 | 0     | Open | ; |
| 26594               | 21530 |     | 21340 |      |   |
| 2.00002932386637    | 160   | 150 | 0     | Open | ; |
| 26595               | 22101 |     | 21908 |      |   |
| 2.00003034481769    | 140   | 150 | 0     | Open | ; |
| 26596               | 21679 |     | 21877 |      |   |
| 2.00003036505376    | 140   | 150 | 0     | Open | ; |
| 26597               | 19374 |     | 23340 |      |   |
| 2.00003039188406    | 100   | 140 | 0     | Open | ; |
| 26598               | 22200 |     | 22201 |      |   |
| 2.00002439883491    | 140   | 150 | 0     | Open | ; |
| 26599               | 20683 |     | 20681 |      |   |
| 2.00002439995061    | 110   | 150 | 0     | Open | ; |
| 26600               | 21975 |     | 21978 |      |   |
| 2.00003045284964    | 150   | 140 | 0     | Open | ; |
| 26601               | 24199 |     | 24200 |      |   |

|                     |       |     |       |      |   |
|---------------------|-------|-----|-------|------|---|
| 2.00003052529156    | 150   | 140 | 0     | Open | ; |
| 26602               | 19074 |     | 20561 |      |   |
| 2.00003053259908    | 125   | 150 | 0     | Open | ; |
| 26603               | 21734 |     | 22746 |      |   |
| 2.00003081213625    | 110   | 150 | 0     | Open | ; |
| 26604               | 22415 |     | 22570 |      |   |
| 2.00003086273132    | 200   | 150 | 0     | Open | ; |
| 26605               | 20438 |     | 19168 |      |   |
| 2.00003092511625    | 100   | 140 | 0     | Open | ; |
| 26606               | 21574 |     | 21712 |      |   |
| 2.00003092511625    | 100   | 140 | 0     | Open | ; |
| 26607               | 21528 |     | 19779 |      |   |
| 2.00003095245697    | 140   | 150 | 0     | Open | ; |
| 26608               | 22318 |     | 21840 |      |   |
| 2.00003112453296    | 140   | 150 | 0     | Open | ; |
| 26609               | 21069 |     | 22038 |      |   |
| 2.00003112574208    | 160   | 150 | 0     | Open | ; |
| 26610               | 20372 |     | 20373 |      |   |
| 2.00003116248126    | 200   | 150 | 0     | Open | ; |
| 26611               | 19380 |     | 21433 |      |   |
| 2.00003128316325    | 100   | 140 | 0     | Open | ; |
| 26612               | 22561 |     | 22562 |      |   |
| 2.00003134432697    | 200   | 150 | 0     | Open | ; |
| 26613               | 23706 |     | 24322 |      |   |
| 2.00003034490563    | 125   | 150 | 0     | Open | ; |
| 26614               | 20293 |     | 20497 |      |   |
| 2.00003135972736    | 150   | 140 | 0     | Open | ; |
| 26615               | 19660 |     | 20947 |      |   |
| 2.00003137139517    | 110   | 150 | 0     | Open | ; |
| 26616               | 18560 |     | 19625 |      |   |
| 2.00002439883491    | 110   | 150 | 0     | Open | ; |
| 26617               | 22559 |     | 20333 |      |   |
| 2.0000244010663 110 |       | 150 | 0     | Open | ; |
| 26618               | 19550 |     | 19551 |      |   |
| 2.00003140541482    | 160   | 150 | 0     | Open | ; |
| 26619               | 18486 |     | 21450 |      |   |
| 2.00003141126963    | 100   | 140 | 0     | Open | ; |
| 26620               | 22730 |     | 21999 |      |   |
| 2.00003149247293    | 350   | 140 | 0     | Open | ; |
| 26621               | 22799 |     | 21361 |      |   |
| 2.00003161211068    | 100   | 140 | 0     | Open | ; |
| 26622               | 21386 |     | 24268 |      |   |
| 2.00003161194759    | 110   | 150 | 0     | Open | ; |
| 26623               | 21237 |     | 19318 |      |   |
| 2.00003165186649    | 110   | 150 | 0     | Open | ; |
| 26624               | 22362 |     | 21754 |      |   |
| 2.00003165273078    | 125   | 140 | 0     | Open | ; |
| 26625               | 22277 |     | 22278 |      |   |
| 2.00003169246646    | 200   | 150 | 0     | Open | ; |
| 26626               | 21865 |     | 21867 |      |   |

|                     |       |     |       |      |   |
|---------------------|-------|-----|-------|------|---|
| 2.00003177262797    | 150   | 140 | 0     | Open | ; |
| 26627               | 21851 |     | 22209 |      |   |
| 2.00003192144404    | 140   | 150 | 0     | Open | ; |
| 26628               | 21030 |     | 21031 |      |   |
| 2.00003201219727    | 125   | 140 | 0     | Open | ; |
| 26629               | 23971 |     | 23978 |      |   |
| 2.00003206121833    | 100   | 140 | 0     | Open | ; |
| 26630               | 20597 |     | 19776 |      |   |
| 2.00003206224941    | 160   | 150 | 0     | Open | ; |
| 26631               | 20279 |     | 18655 |      |   |
| 2.0000320843383 125 |       | 150 | 0     | Open | ; |
| 26632               | 18671 |     | 20857 |      |   |
| 2.00003213151769    | 160   | 150 | 0     | Open | ; |
| 26633               | 22214 |     | 19113 |      |   |
| 2.00003228254518    | 150   | 140 | 0     | Open | ; |
| 26634               | 18497 |     | 18498 |      |   |
| 2.00003236484132    | 110   | 150 | 0     | Open | ; |
| 26635               | 22204 |     | 22205 |      |   |
| 2.00002439945399    | 200   | 150 | 0     | Open | ; |
| 26636               | 20811 |     | 20812 |      |   |
| 2.00002439995061    | 110   | 150 | 0     | Open | ; |
| 26637               | 22032 |     | 21786 |      |   |
| 2.00003244517005    | 100   | 140 | 0     | Open | ; |
| 26638               | 18830 |     | 18829 |      |   |
| 2.00003248160248    | 110   | 150 | 0     | Open | ; |
| 26639               | 18830 |     | 18831 |      |   |
| 2.0000324827385 110 |       | 150 | 0     | Open | ; |
| 26640               | 20498 |     | 20606 |      |   |
| 2.00003248971093    | 200   | 140 | 0     | Open | ; |
| 26641               | 20641 |     | 20733 |      |   |
| 2.00003258000221    | 160   | 150 | 0     | Open | ; |
| 26642               | 23919 |     | 19984 |      |   |
| 2.00003169250157    | 100   | 140 | 0     | Open | ; |
| 26643               | 20599 |     | 19192 |      |   |
| 2.00003275298925    | 100   | 140 | 0     | Open | ; |
| 26644               | 24227 |     | 21997 |      |   |
| 2.00003279967328    | 110   | 150 | 0     | Open | ; |
| 26645               | 21683 |     | 18794 |      |   |
| 2.00003280136181    | 160   | 150 | 0     | Open | ; |
| 26646               | 24164 |     | 21910 |      |   |
| 2.00003280439765    | 140   | 150 | 0     | Open | ; |
| 26647               | 19651 |     | 19652 |      |   |
| 2.00003284021358    | 160   | 150 | 0     | Open | ; |
| 26648               | 22325 |     | 24393 |      |   |
| 2.00003290245714    | 160   | 150 | 0     | Open | ; |
| 26649               | 22165 |     | 21937 |      |   |
| 2.00003305315025    | 110   | 150 | 0     | Open | ; |
| 26650               | 20577 |     | 20578 |      |   |
| 2.00003306175789    | 160   | 150 | 0     | Open | ; |
| 26651               | 18990 |     | 18991 |      |   |

|                     |       |     |       |      |   |
|---------------------|-------|-----|-------|------|---|
| 2.00003306286791    | 160   | 150 | 0     | Open | ; |
| 26652               | 21094 |     | 19277 |      |   |
| 2.00003310500764    | 150   | 140 | 0     | Open | ; |
| 26653               | 22118 |     | 23003 |      |   |
| 2.00003314487828    | 100   | 140 | 0     | Open | ; |
| 26654               | 23987 |     | 24135 |      |   |
| 2.00003328403649    | 100   | 140 | 0     | Open | ; |
| 26655               | 20247 |     | 20248 |      |   |
| 2.00003328490438    | 160   | 150 | 0     | Open | ; |
| 26656               | 22930 |     | 22937 |      |   |
| 2.00003328541646    | 110   | 150 | 0     | Open | ; |
| 26657               | 19415 |     | 24291 |      |   |
| 2.00003332424185    | 160   | 150 | 0     | Open | ; |
| 26658               | 21785 |     | 19862 |      |   |
| 2.00003332441637    | 110   | 150 | 0     | Open | ; |
| 26659               | 22223 |     | 22224 |      |   |
| 2.0000243999572 250 |       | 150 | 0     | Open | ; |
| 26660               | 22223 |     | 22225 |      |   |
| 2.0000244003605 250 |       | 150 | 0     | Open | ; |
| 26661               | 19405 |     | 22920 |      |   |
| 2.00003244403897    | 100   | 140 | 0     | Open | ; |
| 26662               | 20952 |     | 20953 |      |   |
| 2.00003348240388    | 110   | 150 | 0     | Open | ; |
| 26663               | 24201 |     | 23570 |      |   |
| 2.00003279913143    | 125   | 150 | 0     | Open | ; |
| 26664               | 20249 |     | 22103 |      |   |
| 2.00003381243511    | 200   | 150 | 0     | Open | ; |
| 26665               | 20878 |     | 23814 |      |   |
| 2.00003381303667    | 200   | 150 | 0     | Open | ; |
| 26666               | 19305 |     | 19304 |      |   |
| 2.00003381210209    | 125   | 150 | 0     | Open | ; |
| 26667               | 19056 |     | 19057 |      |   |
| 2.00003387203623    | 150   | 140 | 0     | Open | ; |
| 26668               | 21034 |     | 21035 |      |   |
| 2.00003394424629    | 200   | 150 | 0     | Open | ; |
| 26669               | 18545 |     | 22626 |      |   |
| 2.00003404201822    | 110   | 150 | 0     | Open | ; |
| 26670               | 18621 |     | 18622 |      |   |
| 2.00003405016858    | 150   | 140 | 0     | Open | ; |
| 26671               | 18992 |     | 18993 |      |   |
| 2.00003306175789    | 160   | 150 | 0     | Open | ; |
| 26672               | 18735 |     | 19450 |      |   |
| 2.00003306286791    | 110   | 150 | 0     | Open | ; |
| 26673               | 19134 |     | 23438 |      |   |
| 2.00003414186169    | 125   | 140 | 0     | Open | ; |
| 26674               | 20633 |     | 20171 |      |   |
| 2.00003426056225    | 125   | 150 | 0     | Open | ; |
| 26675               | 21078 |     | 21264 |      |   |
| 2.00003426195266    | 150   | 140 | 0     | Open | ; |
| 26676               | 19912 |     | 19913 |      |   |



|                     |       |     |       |      |   |
|---------------------|-------|-----|-------|------|---|
| 2.00003429231806    | 150   | 140 | 0     | Open | ; |
| 26677               | 19632 |     | 19633 |      |   |
| 2.00002439941913    | 140   | 150 | 0     | Open | ; |
| 26678               | 22197 |     | 22199 |      |   |
| 2.0000244010663 140 |       | 150 | 0     | Open | ; |
| 26679               | 21170 |     | 21171 |      |   |
| 2.00003441239945    | 160   | 150 | 0     | Open | ; |
| 26680               | 19010 |     | 19011 |      |   |
| 2.00003470451776    | 160   | 150 | 0     | Open | ; |
| 26681               | 24604 |     | 24605 |      |   |
| 2.00003476327157    | 100   | 140 | 0     | Open | ; |
| 26682               | 21039 |     | 22148 |      |   |
| 2.00003381205561    | 100   | 140 | 0     | Open | ; |
| 26683               | 23142 |     | 23138 |      |   |
| 2.00003491242147    | 200   | 150 | 0     | Open | ; |
| 26684               | 19774 |     | 23777 |      |   |
| 2.00003520274963    | 160   | 150 | 0     | Open | ; |
| 26685               | 19524 |     | 20799 |      |   |
| 2.00003521947093    | 160   | 150 | 0     | Open | ; |
| 26686               | 19935 |     | 20277 |      |   |
| 2.00003521960616    | 110   | 150 | 0     | Open | ; |
| 26687               | 20961 |     | 23955 |      |   |
| 2.00003522244348    | 200   | 140 | 0     | Open | ; |
| 26688               | 22829 |     | 22830 |      |   |
| 2.00003425970404    | 160   | 150 | 0     | Open | ; |
| 26689               | 19396 |     | 22833 |      |   |
| 2.00003528890051    | 300   | 140 | 0     | Open | ; |
| 26690               | 20270 |     | 20271 |      |   |
| 2.00003528981596    | 300   | 140 | 0     | Open | ; |
| 26691               | 18733 |     | 18734 |      |   |
| 2.0000352889137 140 |       | 150 | 0     | Open | ; |
| 26692               | 18860 |     | 18861 |      |   |
| 2.00003536163017    | 125   | 140 | 0     | Open | ; |
| 26693               | 18984 |     | 19860 |      |   |
| 2.00003538003247    | 110   | 150 | 0     | Open | ; |
| 26694               | 20630 |     | 22361 |      |   |
| 2.00002439883491    | 110   | 150 | 0     | Open | ; |
| 26695               | 22555 |     | 22556 |      |   |
| 2.0000243999572 110 |       | 150 | 0     | Open | ; |
| 26696               | 21320 |     | 24294 |      |   |
| 2.00003441239945    | 150   | 140 | 0     | Open | ; |
| 26697               | 21664 |     | 24075 |      |   |
| 2.00003542245453    | 200   | 140 | 0     | Open | ; |
| 26698               | 19294 |     | 21022 |      |   |
| 2.00003548470504    | 100   | 140 | 0     | Open | ; |
| 26699               | 21939 |     | 24132 |      |   |
| 2.00003548478946    | 125   | 150 | 0     | Open | ; |
| 26700               | 21495 |     | 21686 |      |   |
| 2.00003554203403    | 110   | 150 | 0     | Open | ; |
| 26701               | 23665 |     | 23927 |      |   |

|                     |       |     |       |      |   |
|---------------------|-------|-----|-------|------|---|
| 2.00003554144129    | 110   | 150 | 0     | Open | ; |
| 26702               | 21825 |     | 21369 |      |   |
| 2.00003556402131    | 200   | 150 | 0     | Open | ; |
| 26703               | 21500 |     | 23367 |      |   |
| 2.00003556427711    | 160   | 150 | 0     | Open | ; |
| 26704               | 20433 |     | 20434 |      |   |
| 2.00003558271575    | 250   | 140 | 0     | Open | ; |
| 26705               | 22577 |     | 22578 |      |   |
| 5.38805778502181    | 160   | 150 | 0     | Open | ; |
| 26706               | 18659 |     | 22792 |      |   |
| 2.00003570239302    | 250   | 140 | 0     | Open | ; |
| 26707               | 22504 |     | 22505 |      |   |
| 2.00003572391326    | 125   | 150 | 0     | Open | ; |
| 26708               | 19315 |     | 24167 |      |   |
| 2.00003572969272    | 250   | 140 | 0     | Open | ; |
| 26709               | 23568 |     | 24366 |      |   |
| 2.00003573121994    | 200   | 140 | 0     | Open | ; |
| 26710               | 22080 |     | 24246 |      |   |
| 2.00003580415028    | 110   | 150 | 0     | Open | ; |
| 26711               | 22482 |     | 20161 |      |   |
| 2.00003586412912    | 350   | 140 | 0     | Open | ; |
| 26712               | 19154 |     | 21796 |      |   |
| 2.00003596218512    | 150   | 140 | 0     | Open | ; |
| 26713               | 18855 |     | 19688 |      |   |
| 2.00003599169379    | 125   | 140 | 0     | Open | ; |
| 26714               | 19701 |     | 18708 |      |   |
| 2.00003609195874    | 100   | 140 | 0     | Open | ; |
| 26715               | 19720 |     | 22178 |      |   |
| 2.00003632238967    | 125   | 140 | 0     | Open | ; |
| 26716               | 20833 |     | 22647 |      |   |
| 2.00003633317427    | 150   | 140 | 0     | Open | ; |
| 26717               | 20454 |     | 20455 |      |   |
| 2.00003638482977    | 300   | 140 | 0     | Open | ; |
| 26718               | 24187 |     | 24188 |      |   |
| 2.00003638527145    | 250   | 100 | 0     | Open | ; |
| 26719               | 20536 |     | 22231 |      |   |
| 2.0000243988415 110 |       | 150 | 0     | Open | ; |
| 26720               | 20679 |     | 22554 |      |   |
| 2.0000243999572 110 |       | 150 | 0     | Open | ; |
| 26721               | 23029 |     | 21452 |      |   |
| 2.00003641126263    | 125   | 140 | 0     | Open | ; |
| 26722               | 20306 |     | 24009 |      |   |
| 2.00003641244132    | 100   | 140 | 0     | Open | ; |
| 26723               | 19158 |     | 20418 |      |   |
| 2.00003652493637    | 125   | 150 | 0     | Open | ; |
| 26724               | 23640 |     | 23916 |      |   |
| 2.00003653231143    | 150   | 100 | 0     | Open | ; |
| 26725               | 19994 |     | 24119 |      |   |
| 2.00003653257459    | 200   | 140 | 0     | Open | ; |
| 26726               | 18726 |     | 18727 |      |   |

|                    |       |     |       |      |   |
|--------------------|-------|-----|-------|------|---|
| 2.00003656183381   | 100   | 140 | 0     | Open | ; |
| 26727              | 22711 |     | 19081 |      |   |
| 2.000036601594 125 |       | 150 | 0     | Open | ; |
| 26728              | 20601 |     | 20602 |      |   |
| 2.00003660114735   | 160   | 150 | 0     | Open | ; |
| 26729              | 24390 |     | 18917 |      |   |
| 2.00003660237845   | 300   | 140 | 0     | Open | ; |
| 26730              | 18988 |     | 18989 |      |   |
| 2.00003660225895   | 160   | 150 | 0     | Open | ; |
| 26731              | 22384 |     | 18654 |      |   |
| 2.00003663166513   | 100   | 140 | 0     | Open | ; |
| 26732              | 22101 |     | 23633 |      |   |
| 2.00003663172052   | 140   | 150 | 0     | Open | ; |
| 26733              | 20144 |     | 20175 |      |   |
| 2.00003663254825   | 110   | 150 | 0     | Open | ; |
| 26734              | 20216 |     | 20215 |      |   |
| 2.000036643529 100 |       | 140 | 0     | Open | ; |
| 26735              | 22515 |     | 22516 |      |   |
| 2.00003668515834   | 100   | 140 | 0     | Open | ; |
| 26736              | 19920 |     | 21348 |      |   |
| 2.00003684273822   | 200   | 140 | 0     | Open | ; |
| 26737              | 20249 |     | 20251 |      |   |
| 2.00003692423561   | 200   | 150 | 0     | Open | ; |
| 26738              | 21050 |     | 22663 |      |   |
| 2.00003696216612   | 100   | 140 | 0     | Open | ; |
| 26739              | 20050 |     | 19085 |      |   |
| 2.00003699955755   | 125   | 150 | 0     | Open | ; |
| 26740              | 23035 |     | 19250 |      |   |
| 2.00003699950536   | 110   | 150 | 0     | Open | ; |
| 26741              | 22104 |     | 23405 |      |   |
| 2.00003708993935   | 160   | 150 | 0     | Open | ; |
| 26742              | 22877 |     | 23475 |      |   |
| 2.00003726211593   | 200   | 150 | 0     | Open | ; |
| 26743              | 20749 |     | 22449 |      |   |
| 2.00002439945399   | 250   | 150 | 0     | Open | ; |
| 26744              | 20892 |     | 22396 |      |   |
| 2.00003744021077   | 200   | 150 | 0     | Open | ; |
| 26745              | 19156 |     | 19699 |      |   |
| 2.00003748011977   | 100   | 140 | 0     | Open | ; |
| 26746              | 23494 |     | 23850 |      |   |
| 2.00003752208293   | 125   | 150 | 0     | Open | ; |
| 26747              | 24129 |     | 23892 |      |   |
| 2.00003752229033   | 150   | 140 | 0     | Open | ; |
| 26748              | 20470 |     | 20471 |      |   |
| 2.00003660225172   | 160   | 150 | 0     | Open | ; |
| 26749              | 20472 |     | 20473 |      |   |
| 2.00003660225895   | 160   | 150 | 0     | Open | ; |
| 26750              | 19577 |     | 19578 |      |   |
| 2.00003761885768   | 200   | 150 | 0     | Open | ; |
| 26751              | 24371 |     | 21358 |      |   |

|                  |       |     |       |      |   |
|------------------|-------|-----|-------|------|---|
| 2.00003772501425 | 110   | 150 | 0     | Open | ; |
| 26752            | 22121 |     | 24117 |      |   |
| 2.00003773121666 | 100   | 140 | 0     | Open | ; |
| 26753            | 20916 |     | 20917 |      |   |
| 2.00003777040461 | 250   | 100 | 0     | Open | ; |
| 26754            | 20961 |     | 24308 |      |   |
| 2.00003692423561 | 200   | 140 | 0     | Open | ; |
| 26755            | 19920 |     | 22828 |      |   |
| 2.00003795977591 | 200   | 140 | 0     | Open | ; |
| 26756            | 18765 |     | 20562 |      |   |
| 2.00003798180557 | 125   | 150 | 0     | Open | ; |
| 26757            | 19504 |     | 23327 |      |   |
| 2.00003801215255 | 100   | 140 | 0     | Open | ; |
| 26758            | 20257 |     | 21224 |      |   |
| 2.00003806096341 | 125   | 150 | 0     | Open | ; |
| 26759            | 19444 |     | 21836 |      |   |
| 2.00003808468187 | 100   | 140 | 0     | Open | ; |
| 26760            | 23505 |     | 24277 |      |   |
| 2.00003809221916 | 250   | 150 | 0     | Open | ; |
| 26761            | 19330 |     | 19327 |      |   |
| 2.00003812189975 | 110   | 150 | 0     | Open | ; |
| 26762            | 19973 |     | 20936 |      |   |
| 2.00003812497303 | 150   | 140 | 0     | Open | ; |
| 26763            | 20305 |     | 20310 |      |   |
| 2.00003821225885 | 100   | 140 | 0     | Open | ; |
| 26764            | 23040 |     | 24219 |      |   |
| 2.00003830255503 | 300   | 140 | 0     | Open | ; |
| 26765            | 19970 |     | 23296 |      |   |
| 2.00003830368338 | 140   | 150 | 0     | Open | ; |
| 26766            | 20494 |     | 20495 |      |   |
| 2.00003831174997 | 110   | 150 | 0     | Open | ; |
| 26767            | 19838 |     | 23252 |      |   |
| 2.00003834150483 | 160   | 150 | 0     | Open | ; |
| 26768            | 19838 |     | 18834 |      |   |
| 2.00003834239872 | 160   | 150 | 0     | Open | ; |
| 26769            | 18586 |     | 24358 |      |   |
| 2.00003843963572 | 160   | 150 | 0     | Open | ; |
| 26770            | 18532 |     | 18534 |      |   |
| 2.00003844199181 | 250   | 140 | 0     | Open | ; |
| 26771            | 18883 |     | 24255 |      |   |
| 2.00003844215753 | 140   | 150 | 0     | Open | ; |
| 26772            | 19016 |     | 19017 |      |   |
| 2.00003849912865 | 125   | 150 | 0     | Open | ; |
| 26773            | 18776 |     | 21455 |      |   |
| 2.00003849925698 | 160   | 150 | 0     | Open | ; |
| 26774            | 23652 |     | 18672 |      |   |
| 2.00003851279417 | 100   | 140 | 0     | Open | ; |
| 26775            | 24344 |     | 19727 |      |   |
| 2.00003851285247 | 110   | 150 | 0     | Open | ; |
| 26776            | 18901 |     | 18902 |      |   |

|                     |       |     |       |      |   |
|---------------------|-------|-----|-------|------|---|
| 2.00003852201149    | 110   | 150 | 0     | Open | ; |
| 26777               | 21534 |     | 20721 |      |   |
| 2.00003856408277    | 150   | 100 | 0     | Open | ; |
| 26778               | 19392 |     | 19471 |      |   |
| 2.00003856475514    | 110   | 150 | 0     | Open | ; |
| 26779               | 20474 |     | 20475 |      |   |
| 2.00003660225895    | 160   | 150 | 0     | Open | ; |
| 26780               | 20476 |     | 20477 |      |   |
| 2.00003660337056    | 160   | 150 | 0     | Open | ; |
| 26781               | 19910 |     | 19911 |      |   |
| 2.00003888942645    | 150   | 140 | 0     | Open | ; |
| 26782               | 19206 |     | 18909 |      |   |
| 2.0000389116051 110 |       | 150 | 0     | Open | ; |
| 26783               | 21636 |     | 21637 |      |   |
| 2.0000389247918 160 |       | 150 | 0     | Open | ; |
| 26784               | 20961 |     | 24309 |      |   |
| 2.0000389259214 200 |       | 140 | 0     | Open | ; |
| 26785               | 20057 |     | 20058 |      |   |
| 2.00003898180799    | 100   | 140 | 0     | Open | ; |
| 26786               | 21445 |     | 24160 |      |   |
| 2.00003905916367    | 160   | 150 | 0     | Open | ; |
| 26787               | 23752 |     | 19957 |      |   |
| 2.00003908541269    | 160   | 150 | 0     | Open | ; |
| 26788               | 20827 |     | 20828 |      |   |
| 2.00003922390518    | 100   | 140 | 0     | Open | ; |
| 26789               | 20484 |     | 20485 |      |   |
| 2.00003929989332    | 160   | 150 | 0     | Open | ; |
| 26790               | 19273 |     | 19267 |      |   |
| 2.00003936188754    | 110   | 150 | 0     | Open | ; |
| 26791               | 19428 |     | 19926 |      |   |
| 2.00003939139414    | 140   | 150 | 0     | Open | ; |
| 26792               | 18883 |     | 19423 |      |   |
| 2.00003939252158    | 140   | 150 | 0     | Open | ; |
| 26793               | 20103 |     | 22271 |      |   |
| 2.00003950139211    | 100   | 140 | 0     | Open | ; |
| 26794               | 23716 |     | 23623 |      |   |
| 2.00003950387934    | 400   | 130 | 0     | Open | ; |
| 26795               | 20801 |     | 20802 |      |   |
| 2.00003856475514    | 250   | 100 | 0     | Open | ; |
| 26796               | 19287 |     | 21816 |      |   |
| 2.00003962441192    | 110   | 150 | 0     | Open | ; |
| 26797               | 21694 |     | 18880 |      |   |
| 2.00003963159359    | 140   | 150 | 0     | Open | ; |
| 26798               | 21838 |     | 20997 |      |   |
| 2.00003976401171    | 100   | 140 | 0     | Open | ; |
| 26799               | 24022 |     | 22348 |      |   |
| 2.00003976497437    | 200   | 150 | 0     | Open | ; |
| 26800               | 19195 |     | 19883 |      |   |
| 2.00003980230379    | 125   | 140 | 0     | Open | ; |
| 26801               | 18997 |     | 18998 |      |   |

|                     |       |     |       |      |   |
|---------------------|-------|-----|-------|------|---|
| 2.00003984232057    | 125   | 140 | 0     | Open | ; |
| 26802               | 22026 |     | 24186 |      |   |
| 2.00003984157727    | 110   | 150 | 0     | Open | ; |
| 26803               | 21415 |     | 18846 |      |   |
| 2.00003998131624    | 100   | 140 | 0     | Open | ; |
| 26804               | 21488 |     | 24154 |      |   |
| 2.00004016175679    | 150   | 140 | 0     | Open | ; |
| 26805               | 23228 |     | 24218 |      |   |
| 2.0000401847273 100 |       | 140 | 0     | Open | ; |
| 26806               | 18927 |     | 21600 |      |   |
| 2.00004018529476    | 140   | 150 | 0     | Open | ; |
| 26807               | 19249 |     | 19738 |      |   |
| 2.00004022415624    | 110   | 150 | 0     | Open | ; |
| 26808               | 19312 |     | 21778 |      |   |
| 2.00004028505152    | 160   | 150 | 0     | Open | ; |
| 26809               | 18509 |     | 21176 |      |   |
| 2.0000403413485 160 |       | 150 | 0     | Open | ; |
| 26810               | 19033 |     | 19034 |      |   |
| 2.00004034226846    | 125   | 140 | 0     | Open | ; |
| 26811               | 20026 |     | 20027 |      |   |
| 2.00003936130406    | 150   | 140 | 0     | Open | ; |
| 26812               | 23754 |     | 24339 |      |   |
| 2.00003939139414    | 150   | 140 | 0     | Open | ; |
| 26813               | 19036 |     | 19038 |      |   |
| 2.00004047185177    | 110   | 150 | 0     | Open | ; |
| 26814               | 20585 |     | 22047 |      |   |
| 2.0000406043681 100 |       | 140 | 0     | Open | ; |
| 26815               | 18535 |     | 18537 |      |   |
| 2.00004068276261    | 110   | 150 | 0     | Open | ; |
| 26816               | 18915 |     | 23221 |      |   |
| 2.00004073309791    | 250   | 140 | 0     | Open | ; |
| 26817               | 19213 |     | 19214 |      |   |
| 2.00004078246872    | 160   | 150 | 0     | Open | ; |
| 26818               | 20010 |     | 21872 |      |   |
| 2.00003980217077    | 250   | 140 | 0     | Open | ; |
| 26819               | 20268 |     | 20269 |      |   |
| 2.00004080909394    | 250   | 150 | 0     | Open | ; |
| 26820               | 18969 |     | 18970 |      |   |
| 2.00004087271211    | 100   | 140 | 0     | Open | ; |
| 26821               | 18791 |     | 18793 |      |   |
| 2.00004088896806    | 110   | 150 | 0     | Open | ; |
| 26822               | 20893 |     | 22789 |      |   |
| 2.00004095171293    | 200   | 140 | 0     | Open | ; |
| 26823               | 21745 |     | 23715 |      |   |
| 2.00004103204288    | 110   | 150 | 0     | Open | ; |
| 26824               | 24079 |     | 24081 |      |   |
| 2.00004106437387    | 110   | 150 | 0     | Open | ; |
| 26825               | 21560 |     | 22751 |      |   |
| 2.0000410848138 125 |       | 140 | 0     | Open | ; |
| 26826               | 22933 |     | 23602 |      |   |

|                  |       |     |       |      |   |
|------------------|-------|-----|-------|------|---|
| 2.00004112435989 | 110   | 150 | 0     | Open | ; |
| 26827            | 21018 |     | 21019 |      |   |
| 2.00004112528175 | 110   | 150 | 0     | Open | ; |
| 26828            | 20837 |     | 20838 |      |   |
| 2.00004018473199 | 140   | 150 | 0     | Open | ; |
| 26829            | 20085 |     | 20579 |      |   |
| 2.00004022465468 | 200   | 140 | 0     | Open | ; |
| 26830            | 22823 |     | 22824 |      |   |
| 2.00004124219536 | 160   | 150 | 0     | Open | ; |
| 26831            | 20128 |     | 20150 |      |   |
| 2.00004124351466 | 160   | 150 | 0     | Open | ; |
| 26832            | 21646 |     | 21647 |      |   |
| 2.00004136467279 | 200   | 140 | 0     | Open | ; |
| 26833            | 20734 |     | 20640 |      |   |
| 2.00004136532375 | 200   | 150 | 0     | Open | ; |
| 26834            | 22548 |     | 22661 |      |   |
| 2.00004141174235 | 160   | 150 | 0     | Open | ; |
| 26835            | 22402 |     | 22520 |      |   |
| 2.00004146154931 | 125   | 140 | 0     | Open | ; |
| 26836            | 18964 |     | 22790 |      |   |
| 2.00004161223016 | 200   | 100 | 0     | Open | ; |
| 26837            | 22304 |     | 22343 |      |   |
| 2.00004167181342 | 100   | 140 | 0     | Open | ; |
| 26838            | 19487 |     | 20364 |      |   |
| 2.00004170455992 | 150   | 140 | 0     | Open | ; |
| 26839            | 23847 |     | 23845 |      |   |
| 2.00004179893372 | 160   | 150 | 0     | Open | ; |
| 26840            | 22029 |     | 20905 |      |   |
| 1.79688858981153 | 125   | 150 | 0     | Open | ; |
| 26841            | 19223 |     | 19224 |      |   |
| 2.00004200130381 | 110   | 150 | 0     | Open | ; |
| 26842            | 20208 |     | 22660 |      |   |
| 2.00004204219118 | 110   | 150 | 0     | Open | ; |
| 26843            | 22522 |     | 22524 |      |   |
| 2.00004211126019 | 250   | 140 | 0     | Open | ; |
| 26844            | 23041 |     | 24103 |      |   |
| 2.00004112465532 | 125   | 150 | 0     | Open | ; |
| 26845            | 24381 |     | 24382 |      |   |
| 2.00004221154869 | 400   | 130 | 0     | Open | ; |
| 26846            | 22664 |     | 20112 |      |   |
| 2.00004228934006 | 100   | 140 | 0     | Open | ; |
| 26847            | 22323 |     | 18866 |      |   |
| 2.00004235288961 | 160   | 150 | 0     | Open | ; |
| 26848            | 19279 |     | 19978 |      |   |
| 2.00004242527753 | 150   | 140 | 0     | Open | ; |
| 26849            | 22655 |     | 22656 |      |   |
| 2.00004244320457 | 110   | 150 | 0     | Open | ; |
| 26850            | 21974 |     | 20589 |      |   |
| 2.00004248218516 | 110   | 150 | 0     | Open | ; |
| 26851            | 20388 |     | 20389 |      |   |

|                  |       |     |       |      |   |
|------------------|-------|-----|-------|------|---|
| 2.00004271244051 | 125   | 150 | 0     | Open | ; |
| 26852            | 21574 |     | 18687 |      |   |
| 2.00004274155011 | 100   | 140 | 0     | Open | ; |
| 26853            | 20089 |     | 22563 |      |   |
| 2.00004274158129 | 150   | 140 | 0     | Open | ; |
| 26854            | 23771 |     | 24107 |      |   |
| 2.00004274523701 | 125   | 140 | 0     | Open | ; |
| 26855            | 21214 |     | 21147 |      |   |
| 2.00004323202644 | 125   | 150 | 0     | Open | ; |
| 26856            | 21561 |     | 18787 |      |   |
| 2.00004332425904 | 125   | 140 | 0     | Open | ; |
| 26857            | 19851 |     | 20272 |      |   |
| 2.00004332457221 | 150   | 140 | 0     | Open | ; |
| 26858            | 23779 |     | 21564 |      |   |
| 2.00004342474727 | 100   | 140 | 0     | Open | ; |
| 26859            | 18527 |     | 18528 |      |   |
| 2.00004356177418 | 160   | 150 | 0     | Open | ; |
| 26860            | 22977 |     | 22959 |      |   |
| 2.00004378317729 | 125   | 150 | 0     | Open | ; |
| 26861            | 22537 |     | 22538 |      |   |
| 2.00004378378903 | 500   | 150 | 0     | Open | ; |
| 26862            | 18728 |     | 23694 |      |   |
| 2.00004388094679 | 125   | 150 | 0     | Open | ; |
| 26863            | 20457 |     | 20458 |      |   |
| 2.00004388999843 | 200   | 140 | 0     | Open | ; |
| 26864            | 23616 |     | 23682 |      |   |
| 2.0000440029024  | 200   | 150 | 0     | Open | ; |
| 26865            | 21120 |     | 20978 |      |   |
| 2.00004406245    | 100   | 140 | 0     | Open | ; |
| 26866            | 21091 |     | 18780 |      |   |
| 2.00004437258966 | 160   | 150 | 0     | Open | ; |
| 26867            | 24287 |     | 23994 |      |   |
| 2.00004440460487 | 100   | 140 | 0     | Open | ; |
| 26868            | 21848 |     | 21845 |      |   |
| 2.00004462425645 | 160   | 150 | 0     | Open | ; |
| 26869            | 21948 |     | 24258 |      |   |
| 2.00004466152115 | 450   | 100 | 0     | Open | ; |
| 26870            | 23314 |     | 24109 |      |   |
| 2.00004466208613 | 125   | 150 | 0     | Open | ; |
| 26871            | 21158 |     | 21157 |      |   |
| 2.00004466444688 | 160   | 150 | 0     | Open | ; |
| 26872            | 20421 |     | 20422 |      |   |
| 2.00004475057795 | 160   | 150 | 0     | Open | ; |
| 26873            | 18493 |     | 18494 |      |   |
| 2.00004476943137 | 125   | 150 | 0     | Open | ; |
| 26874            | 19701 |     | 20929 |      |   |
| 2.00004478509126 | 100   | 140 | 0     | Open | ; |
| 26875            | 21343 |     | 21685 |      |   |
| 2.00004479180882 | 125   | 150 | 0     | Open | ; |
| 26876            | 21714 |     | 23708 |      |   |



|                     |       |     |       |      |   |
|---------------------|-------|-----|-------|------|---|
| 2.00004481970636    | 160   | 150 | 0     | Open | ; |
| 26877               | 20742 |     | 20985 |      |   |
| 2.00004484464989    | 500   | 130 | 0     | Open | ; |
| 26878               | 18810 |     | 21418 |      |   |
| 2.00004493155522    | 125   | 150 | 0     | Open | ; |
| 26879               | 23424 |     | 23422 |      |   |
| 2.00004494192103    | 110   | 150 | 0     | Open | ; |
| 26880               | 20613 |     | 20614 |      |   |
| 2.00004512500674    | 110   | 150 | 0     | Open | ; |
| 26881               | 20924 |     | 20925 |      |   |
| 2.00004524977962    | 160   | 150 | 0     | Open | ; |
| 26882               | 23441 |     | 24244 |      |   |
| 2.00004526246526    | 100   | 140 | 0     | Open | ; |
| 26883               | 19076 |     | 24813 |      |   |
| 2.00004536306045    | 110   | 150 | 0     | Open | ; |
| 26884               | 21070 |     | 21074 |      |   |
| 2.0000454051463 160 |       | 150 | 0     | Open | ; |
| 26885               | 19444 |     | 21833 |      |   |
| 2.00004544999859    | 100   | 140 | 0     | Open | ; |
| 26886               | 19359 |     | 24138 |      |   |
| 2.00004545237352    | 150   | 140 | 0     | Open | ; |
| 26887               | 18994 |     | 18995 |      |   |
| 2.00004550482756    | 200   | 140 | 0     | Open | ; |
| 26888               | 19946 |     | 21842 |      |   |
| 2.00004556955731    | 140   | 150 | 0     | Open | ; |
| 26889               | 19575 |     | 19576 |      |   |
| 2.00004571208423    | 100   | 140 | 0     | Open | ; |
| 26890               | 20686 |     | 20687 |      |   |
| 2.00004575177136    | 250   | 150 | 0     | Open | ; |
| 26891               | 22417 |     | 22727 |      |   |
| 2.00004579957174    | 125   | 150 | 0     | Open | ; |
| 26892               | 22479 |     | 22480 |      |   |
| 2.00004586237312    | 110   | 150 | 0     | Open | ; |
| 26893               | 21595 |     | 22776 |      |   |
| 2.00004600238566    | 200   | 150 | 0     | Open | ; |
| 26894               | 23757 |     | 21709 |      |   |
| 2.00004612400136    | 100   | 140 | 0     | Open | ; |
| 26895               | 23002 |     | 20907 |      |   |
| 2.00004617170533    | 100   | 140 | 0     | Open | ; |
| 26896               | 20500 |     | 20501 |      |   |
| 2.00004618384186    | 150   | 140 | 0     | Open | ; |
| 26897               | 18961 |     | 18962 |      |   |
| 2.00004653126961    | 250   | 100 | 0     | Open | ; |
| 26898               | 19936 |     | 22567 |      |   |
| 2.00004674231486    | 150   | 140 | 0     | Open | ; |
| 26899               | 23756 |     | 21711 |      |   |
| 2.00004676425602    | 100   | 140 | 0     | Open | ; |
| 26900               | 22736 |     | 22737 |      |   |
| 2.00004688887573    | 500   | 140 | 0     | Open | ; |
| 26901               | 22736 |     | 22843 |      |   |

|                  |       |     |       |      |   |
|------------------|-------|-----|-------|------|---|
| 2.00004688990348 | 500   | 140 | 0     | Open | ; |
| 26902            | 21479 |     | 19200 |      |   |
| 2.00004692930107 | 110   | 150 | 0     | Open | ; |
| 26903            | 22407 |     | 22509 |      |   |
| 2.00004693054017 | 200   | 150 | 0     | Open | ; |
| 26904            | 19062 |     | 19063 |      |   |
| 2.00004713194542 | 140   | 150 | 0     | Open | ; |
| 26905            | 21658 |     | 24290 |      |   |
| 2.00004724968198 | 250   | 140 | 0     | Open | ; |
| 26906            | 18686 |     | 18845 |      |   |
| 2.00004731117835 | 100   | 140 | 0     | Open | ; |
| 26907            | 22964 |     | 24065 |      |   |
| 2.00004732428803 | 450   | 100 | 0     | Open | ; |
| 26908            | 22840 |     | 22841 |      |   |
| 2.00004744319233 | 150   | 140 | 0     | Open | ; |
| 26909            | 20430 |     | 21771 |      |   |
| 2.00004745951777 | 125   | 140 | 0     | Open | ; |
| 26910            | 22163 |     | 22164 |      |   |
| 2.00004762182005 | 150   | 140 | 0     | Open | ; |
| 26911            | 24539 |     | 19490 |      |   |
| 2.00004762446955 | 160   | 150 | 0     | Open | ; |
| 26912            | 23671 |     | 24195 |      |   |
| 2.00004772460439 | 150   | 140 | 0     | Open | ; |
| 26913            | 19095 |     | 19092 |      |   |
| 2.00004784882372 | 110   | 150 | 0     | Open | ; |
| 26914            | 19117 |     | 20349 |      |   |
| 2.00004796174707 | 125   | 150 | 0     | Open | ; |
| 26915            | 21092 |     | 19283 |      |   |
| 2.00004800191054 | 140   | 150 | 0     | Open | ; |
| 26916            | 23841 |     | 24181 |      |   |
| 2.00004800308462 | 300   | 140 | 0     | Open | ; |
| 26917            | 20869 |     | 18947 |      |   |
| 2.00004806191755 | 100   | 140 | 0     | Open | ; |
| 26918            | 19365 |     | 24267 |      |   |
| 2.0000482915833  | 160   | 150 | 0     | Open | ; |
| 26919            | 21946 |     | 21947 |      |   |
| 2.00004830157922 | 110   | 150 | 0     | Open | ; |
| 26920            | 24048 |     | 20777 |      |   |
| 2.00004832202932 | 110   | 150 | 0     | Open | ; |
| 26921            | 20410 |     | 20465 |      |   |
| 2.00004832202932 | 110   | 150 | 0     | Open | ; |
| 26922            | 19286 |     | 23810 |      |   |
| 2.00004833973138 | 110   | 150 | 0     | Open | ; |
| 26923            | 20122 |     | 22993 |      |   |
| 2.00004839822921 | 100   | 140 | 0     | Open | ; |
| 26924            | 20861 |     | 23317 |      |   |
| 2.0000485618535  | 100   | 140 | 0     | Open | ; |
| 26925            | 20439 |     | 21971 |      |   |
| 2.00004857959759 | 125   | 140 | 0     | Open | ; |
| 26926            | 24144 |     | 24146 |      |   |

|                     |       |     |       |      |   |
|---------------------|-------|-----|-------|------|---|
| 2.00004762428291    | 250   | 140 | 0     | Open | ; |
| 26927               | 20454 |     | 20456 |      |   |
| 2.00004871258985    | 300   | 140 | 0     | Open | ; |
| 26928               | 22158 |     | 19333 |      |   |
| 2.00004872184626    | 200   | 150 | 0     | Open | ; |
| 26929               | 23382 |     | 21824 |      |   |
| 2.00004872392405    | 110   | 150 | 0     | Open | ; |
| 26930               | 23635 |     | 19246 |      |   |
| 2.00004872456306    | 125   | 150 | 0     | Open | ; |
| 26931               | 20091 |     | 20876 |      |   |
| 2.00004874380024    | 200   | 150 | 0     | Open | ; |
| 26932               | 24343 |     | 19728 |      |   |
| 2.00004879264273    | 110   | 150 | 0     | Open | ; |
| 26933               | 20843 |     | 24126 |      |   |
| 2.00004889915729    | 100   | 140 | 0     | Open | ; |
| 26934               | 18874 |     | 23782 |      |   |
| 2.00004893323059    | 125   | 140 | 0     | Open | ; |
| 26935               | 24360 |     | 22615 |      |   |
| 2.0000490817648 125 |       | 150 | 0     | Open | ; |
| 26936               | 21064 |     | 19411 |      |   |
| 2.00004912450118    | 110   | 150 | 0     | Open | ; |
| 26937               | 22732 |     | 22733 |      |   |
| 2.00004961160703    | 200   | 140 | 0     | Open | ; |
| 26938               | 18642 |     | 24168 |      |   |
| 2.00004762428291    | 250   | 140 | 0     | Open | ; |
| 26939               | 19279 |     | 21248 |      |   |
| 2.0000487231963 150 |       | 140 | 0     | Open | ; |
| 26940               | 22059 |     | 24262 |      |   |
| 2.00004977238966    | 100   | 140 | 0     | Open | ; |
| 26941               | 22977 |     | 23848 |      |   |
| 2.00004980961262    | 125   | 150 | 0     | Open | ; |
| 26942               | 19570 |     | 19571 |      |   |
| 2.00004995226008    | 125   | 130 | 0     | Open | ; |
| 26943               | 20370 |     | 20371 |      |   |
| 2.00005005205255    | 140   | 150 | 0     | Open | ; |
| 26944               | 20462 |     | 20463 |      |   |
| 2.00005012433458    | 200   | 150 | 0     | Open | ; |
| 26945               | 22620 |     | 24150 |      |   |
| 2.00005025189807    | 160   | 150 | 0     | Open | ; |
| 26946               | 19052 |     | 19053 |      |   |
| 2.00005033165912    | 125   | 140 | 0     | Open | ; |
| 26947               | 21001 |     | 21029 |      |   |
| 2.0000503316516 200 |       | 150 | 0     | Open | ; |
| 26948               | 22525 |     | 22526 |      |   |
| 2.00005055179866    | 100   | 140 | 0     | Open | ; |
| 26949               | 20258 |     | 21949 |      |   |
| 2.0000508481345 125 |       | 150 | 0     | Open | ; |
| 26950               | 20130 |     | 20605 |      |   |
| 2.0000509115055 160 |       | 150 | 0     | Open | ; |
| 26951               | 24020 |     | 21837 |      |   |

|                     |       |     |       |      |   |
|---------------------|-------|-----|-------|------|---|
| 2.00005156124734    | 100   | 140 | 0     | Open | ; |
| 26952               | 18548 |     | 20759 |      |   |
| 2.00005163254106    | 110   | 150 | 0     | Open | ; |
| 26953               | 20367 |     | 20369 |      |   |
| 2.00005200895139    | 200   | 140 | 0     | Open | ; |
| 26954               | 20818 |     | 20819 |      |   |
| 2.00005228230003    | 100   | 140 | 0     | Open | ; |
| 26955               | 23232 |     | 23269 |      |   |
| 2.00005294491325    | 160   | 150 | 0     | Open | ; |
| 26956               | 22572 |     | 22573 |      |   |
| 2.00005340189925    | 110   | 150 | 0     | Open | ; |
| 26957               | 20835 |     | 20836 |      |   |
| 2.00005411901714    | 200   | 150 | 0     | Open | ; |
| 26958               | 19879 |     | 19880 |      |   |
| 2.00005426222688    | 200   | 150 | 0     | Open | ; |
| 26959               | 22337 |     | 22338 |      |   |
| 2.00005466106604    | 125   | 150 | 0     | Open | ; |
| 26960               | 24801 |     | 24802 |      |   |
| 2.00005480401955    | 110   | 150 | 0     | Open | ; |
| 26961               | 20419 |     | 20563 |      |   |
| 2.00005481958124    | 160   | 150 | 0     | Open | ; |
| 26962               | 21498 |     | 24364 |      |   |
| 2.00005534432856    | 110   | 150 | 0     | Open | ; |
| 26963               | 20631 |     | 20632 |      |   |
| 2.00005543921682    | 125   | 150 | 0     | Open | ; |
| 26964               | 20483 |     | 20301 |      |   |
| 2.00005992907872    | 160   | 150 | 0     | Open | ; |
| 26965               | 19638 |     | 19639 |      |   |
| 2.00006809842295    | 125   | 150 | 0     | Open | ; |
| 26966               | 23991 |     | 23989 |      |   |
| 2.00253216888166    | 160   | 150 | 0     | Open | ; |
| 26967               | 22089 |     | 20315 |      |   |
| 2.00490803999988    | 200   | 150 | 0     | Open | ; |
| 26968               | 24274 |     | 24369 |      |   |
| 2.00603416002952    | 300   | 140 | 0     | Open | ; |
| 26969               | 22530 |     | 22531 |      |   |
| 2.01118041128297    | 110   | 150 | 0     | Open | ; |
| 26970               | 24875 |     | 24876 |      |   |
| 2.02218397356694    | 200   | 150 | 0     | Open | ; |
| 26971               | 24575 |     | 24653 |      |   |
| 2.0328621823609 160 |       | 150 | 0     | Open | ; |
| 26972               | 21406 |     | 22503 |      |   |
| 2.03584578244702    | 400   | 130 | 0     | Open | ; |
| 26973               | 24269 |     | 23453 |      |   |
| 2.06170177115522    | 200   | 150 | 0     | Open | ; |
| 26974               | 24861 |     | 24862 |      |   |
| 2.06816489811196    | 140   | 150 | 0     | Open | ; |
| 26975               | 19676 |     | 19677 |      |   |
| 2.07454874636936    | 350   | 140 | 0     | Open | ; |
| 26976               | 21012 |     | 21013 |      |   |

|                     |       |     |       |      |   |
|---------------------|-------|-----|-------|------|---|
| 2.07574151131315    | 160   | 150 | 0     | Open | ; |
| 26977               | 24478 |     | 24585 |      |   |
| 2.09536111744885    | 140   | 150 | 0     | Open | ; |
| 26978               | 22060 |     | 21747 |      |   |
| 2.10807080036198    | 100   | 140 | 0     | Open | ; |
| 26979               | 20316 |     | 22429 |      |   |
| 2.11826426377842    | 160   | 150 | 0     | Open | ; |
| 26980               | 24890 |     | 24431 |      |   |
| 2.12041101885749    | 110   | 150 | 0     | Open | ; |
| 26981               | 19499 |     | 18836 |      |   |
| 2.12144227326003    | 200   | 150 | 0     | Open | ; |
| 26982               | 24735 |     | 24736 |      |   |
| 2.1283775635041 160 |       | 150 | 0     | Open | ; |
| 26983               | 24864 |     | 24865 |      |   |
| 2.13614591243785    | 250   | 100 | 0     | Open | ; |
| 26984               | 22559 |     | 24047 |      |   |
| 2.15447483100471    | 110   | 150 | 0     | Open | ; |
| 26985               | 20314 |     | 20132 |      |   |
| 2.1642563105432 160 |       | 150 | 0     | Open | ; |
| 26986               | 20697 |     | 20403 |      |   |
| 2.16451972030332    | 75    | 150 | 0     | Open | ; |
| 26987               | 18832 |     | 18833 |      |   |
| 2.17552322417563    | 200   | 150 | 0     | Open | ; |
| 26988               | 20571 |     | 20572 |      |   |
| 2.19698174924397    | 110   | 150 | 0     | Open | ; |
| 26989               | 20428 |     | 20352 |      |   |
| 2.200710969349 140  |       | 150 | 0     | Open | ; |
| 26990               | 22069 |     | 21928 |      |   |
| 2.20273590313472    | 160   | 150 | 0     | Open | ; |
| 26991               | 23808 |     | 20714 |      |   |
| 2.20278445647229    | 200   | 100 | 0     | Open | ; |
| 26992               | 22242 |     | 22241 |      |   |
| 2.20603322191817    | 200   | 150 | 0     | Open | ; |
| 26993               | 22532 |     | 22533 |      |   |
| 2.2271038787426 110 |       | 150 | 0     | Open | ; |
| 26994               | 23656 |     | 24026 |      |   |
| 2.23399429843994    | 200   | 150 | 0     | Open | ; |
| 26995               | 24575 |     | 24576 |      |   |
| 2.24185784506171    | 160   | 150 | 0     | Open | ; |
| 26996               | 18851 |     | 24273 |      |   |
| 2.26804332369187    | 100   | 140 | 0     | Open | ; |
| 26997               | 19187 |     | 19188 |      |   |
| 2.28007622694026    | 200   | 150 | 0     | Open | ; |
| 26998               | 20821 |     | 20822 |      |   |
| 2.29292610665695    | 450   | 140 | 0     | Open | ; |
| 26999               | 22183 |     | 22181 |      |   |
| 2.29517278209185    | 300   | 140 | 0     | Open | ; |
| 27000               | 24808 |     | 24810 |      |   |
| 2.3128881874881 160 |       | 150 | 0     | Open | ; |
| 27001               | 23071 |     | 22446 |      |   |

|                     |       |     |       |      |   |
|---------------------|-------|-----|-------|------|---|
| 2.35000112530244    | 75    | 150 | 0     | Open | ; |
| 27002               | 23168 |     | 24708 |      |   |
| 2.3598122390447 160 |       | 150 | 0     | Open | ; |
| 27003               | 20696 |     | 20698 |      |   |
| 2.37805609085018    | 110   | 150 | 0     | Open | ; |
| 27004               | 21681 |     | 20348 |      |   |
| 2.38360683050224    | 250   | 140 | 0     | Open | ; |
| 27005               | 24608 |     | 24609 |      |   |
| 2.39990481793407    | 160   | 150 | 0     | Open | ; |
| 27006               | 21110 |     | 21111 |      |   |
| 2.44763532065041    | 160   | 150 | 0     | Open | ; |
| 27007               | 19972 |     | 20769 |      |   |
| 2.47189989534221    | 150   | 140 | 0     | Open | ; |
| 27008               | 21625 |     | 21627 |      |   |
| 2.47566103097838    | 160   | 150 | 0     | Open | ; |
| 27009               | 20400 |     | 21057 |      |   |
| 2.49986009556905    | 160   | 150 | 0     | Open | ; |
| 27010               | 22071 |     | 18930 |      |   |
| 2.50130787599273    | 200   | 150 | 0     | Open | ; |
| 27011               | 24451 |     | 24453 |      |   |
| 2.51050913112158    | 110   | 150 | 0     | Open | ; |
| 27012               | 24915 |     | 19553 |      |   |
| 2.51855695437905    | 250   | 100 | 0     | Open | ; |
| 27013               | 24824 |     | 25694 |      |   |
| 3.28743101432374    | 100   | 150 | 0     | Open | ; |
| 27014               | 20328 |     | 20329 |      |   |
| 2.55074994726581    | 110   | 150 | 0     | Open | ; |
| 27015               | 23697 |     | 23698 |      |   |
| 2.59152804754973    | 75    | 140 | 0     | Open | ; |
| 27016               | 21629 |     | 21630 |      |   |
| 2.60282200708986    | 200   | 150 | 0     | Open | ; |
| 27017               | 23183 |     | 24707 |      |   |
| 2.62887566250218    | 200   | 150 | 0     | Open | ; |
| 27018               | 21012 |     | 22013 |      |   |
| 2.63461663424221    | 160   | 150 | 0     | Open | ; |
| 27019               | 20706 |     | 21901 |      |   |
| 2.68301122761838    | 200   | 150 | 0     | Open | ; |
| 27020               | 22407 |     | 21087 |      |   |
| 2.72011227145807    | 200   | 150 | 0     | Open | ; |
| 27021               | 18694 |     | 21899 |      |   |
| 2.75436876226388    | 160   | 150 | 0     | Open | ; |
| 27022               | 19580 |     | 20695 |      |   |
| 2.81183551028717    | 160   | 150 | 0     | Open | ; |
| 27023               | 22191 |     | 22192 |      |   |
| 2.81272285332984    | 400   | 130 | 0     | Open | ; |
| 27024               | 22262 |     | 22218 |      |   |
| 2.8159746817449 110 |       | 150 | 0     | Open | ; |
| 27025               | 24251 |     | 22652 |      |   |
| 2.83642300122046    | 250   | 140 | 0     | Open | ; |
| 27026               | 22189 |     | 22190 |      |   |

|                  |       |     |       |      |   |
|------------------|-------|-----|-------|------|---|
| 2.83956494009821 | 400   | 130 | 0     | Open | ; |
| 27027            | 18861 |     | 23912 |      |   |
| 2.84679150798812 | 75    | 140 | 0     | Open | ; |
| 27028            | 19589 |     | 19590 |      |   |
| 2.86533953722458 | 160   | 150 | 0     | Open | ; |
| 27029            | 18650 |     | 20174 |      |   |
| 2.86557509840031 | 250   | 100 | 0     | Open | ; |
| 27030            | 21262 |     | 21263 |      |   |
| 2.86830056533321 | 100   | 140 | 0     | Open | ; |
| 27031            | 18478 |     | 22649 |      |   |
| 2.89370497767509 | 300   | 140 | 0     | Open | ; |
| 27032            | 23470 |     | 21426 |      |   |
| 2.89552997024862 | 160   | 150 | 0     | Open | ; |
| 27033            | 24815 |     | 18602 |      |   |
| 2.89762552759977 | 110   | 150 | 0     | Open | ; |
| 27034            | 22676 |     | 20005 |      |   |
| 2.90584916595281 | 75    | 150 | 0     | Open | ; |
| 27035            | 21296 |     | 21439 |      |   |
| 3.99989936243705 | 160   | 150 | 0     | Open | ; |
| 27036            | 24020 |     | 21829 |      |   |
| 2.92605860514747 | 100   | 140 | 0     | Open | ; |
| 27037            | 24868 |     | 24869 |      |   |
| 2.93124751634783 | 110   | 150 | 0     | Open | ; |
| 27038            | 22919 |     | 20367 |      |   |
| 2.93828511982717 | 200   | 140 | 0     | Open | ; |
| 27039            | 19261 |     | 18871 |      |   |
| 2.94219181705927 | 450   | 130 | 0     | Open | ; |
| 27040            | 24596 |     | 22419 |      |   |
| 2.99018180883586 | 200   | 150 | 0     | Open | ; |
| 27041            | 22952 |     | 19886 |      |   |
| 2.99851730025964 | 200   | 150 | 0     | Open | ; |
| 27042            | 20265 |     | 23904 |      |   |
| 2.9996819109011  | 200   | 100 | 0     | Open | ; |
| 27043            | 22524 |     | 23107 |      |   |
| 2.99973059156972 | 100   | 140 | 0     | Open | ; |
| 27044            | 21967 |     | 21968 |      |   |
| 2.99973495741087 | 110   | 150 | 0     | Open | ; |
| 27045            | 19900 |     | 24023 |      |   |
| 2.9997400461218  | 140   | 150 | 0     | Open | ; |
| 27046            | 20370 |     | 22499 |      |   |
| 2.99979258113328 | 140   | 150 | 0     | Open | ; |
| 27047            | 20518 |     | 21054 |      |   |
| 3.00710058465809 | 110   | 150 | 0     | Open | ; |
| 27048            | 22033 |     | 22034 |      |   |
| 3.01110591283572 | 160   | 150 | 0     | Open | ; |
| 27049            | 22154 |     | 23788 |      |   |
| 3.0211542186655  | 160   | 150 | 0     | Open | ; |
| 27050            | 19649 |     | 20575 |      |   |
| 3.03182496164706 | 160   | 150 | 0     | Open | ; |
| 27051            | 22128 |     | 22129 |      |   |

|                  |       |     |       |      |   |
|------------------|-------|-----|-------|------|---|
| 3.03315494030003 | 125   | 150 | 0     | Open | ; |
| 27052            | 20638 |     | 23955 |      |   |
| 3.0466990411751  | 150   | 140 | 0     | Open | ; |
| 27053            | 22691 |     | 22692 |      |   |
| 3.07142438101918 | 160   | 150 | 0     | Open | ; |
| 27054            | 20709 |     | 20710 |      |   |
| 3.0869127888077  | 200   | 150 | 0     | Open | ; |
| 27055            | 20331 |     | 20703 |      |   |
| 3.08957618585934 | 200   | 150 | 0     | Open | ; |
| 27056            | 20573 |     | 20574 |      |   |
| 3.09047937408416 | 110   | 150 | 0     | Open | ; |
| 27057            | 21900 |     | 20424 |      |   |
| 3.10261642497565 | 200   | 150 | 0     | Open | ; |
| 27058            | 22768 |     | 20687 |      |   |
| 3.12512093384598 | 150   | 140 | 0     | Open | ; |
| 27059            | 22000 |     | 22811 |      |   |
| 3.12983950524127 | 350   | 140 | 0     | Open | ; |
| 27060            | 23266 |     | 21700 |      |   |
| 3.13691876866456 | 100   | 140 | 0     | Open | ; |
| 27061            | 21152 |     | 21153 |      |   |
| 3.14930759551637 | 160   | 150 | 0     | Open | ; |
| 27062            | 24868 |     | 25700 |      |   |
| 3.99954073942855 | 100   | 150 | 0     | Open | ; |
| 27063            | 24022 |     | 20873 |      |   |
| 3.16790344678555 | 200   | 150 | 0     | Open | ; |
| 27064            | 22076 |     | 18748 |      |   |
| 3.17679374550658 | 250   | 100 | 0     | Open | ; |
| 27065            | 24614 |     | 24615 |      |   |
| 3.20056285023823 | 160   | 150 | 0     | Open | ; |
| 27066            | 19579 |     | 22542 |      |   |
| 3.20648455449335 | 160   | 150 | 0     | Open | ; |
| 27067            | 20338 |     | 20704 |      |   |
| 3.2198031776387  | 160   | 150 | 0     | Open | ; |
| 27068            | 23065 |     | 20625 |      |   |
| 3.22406957297289 | 200   | 150 | 0     | Open | ; |
| 27069            | 20705 |     | 21943 |      |   |
| 3.22521731484821 | 200   | 150 | 0     | Open | ; |
| 27070            | 18697 |     | 21905 |      |   |
| 3.2303720918883  | 200   | 150 | 0     | Open | ; |
| 27071            | 21399 |     | 21400 |      |   |
| 3.23139508187902 | 200   | 150 | 0     | Open | ; |
| 27072            | 24134 |     | 20347 |      |   |
| 3.31624288050784 | 250   | 140 | 0     | Open | ; |
| 27073            | 19068 |     | 19069 |      |   |
| 3.32291911400386 | 110   | 150 | 0     | Open | ; |
| 27074            | 19070 |     | 19071 |      |   |
| 3.33943557249783 | 110   | 150 | 0     | Open | ; |
| 27075            | 23592 |     | 23593 |      |   |
| 3.38914455495454 | 250   | 140 | 0     | Open | ; |
| 27076            | 20945 |     | 18749 |      |   |



|                  |       |     |       |      |   |
|------------------|-------|-----|-------|------|---|
| 3.39101564792764 | 250   | 100 | 0     | Open | ; |
| 27077            | 21625 |     | 21626 |      |   |
| 3.393189993296   | 160   | 150 | 0     | Open | ; |
| 27078            | 21593 |     | 21594 |      |   |
| 3.36452142637672 | 250   | 150 | 0     | Open | ; |
| 27079            | 23807 |     | 23808 |      |   |
| 3.41937731893233 | 200   | 100 | 0     | Open | ; |
| 27080            | 19854 |     | 19310 |      |   |
| 3.44572817989849 | 200   | 150 | 0     | Open | ; |
| 27081            | 24157 |     | 24866 |      |   |
| 3.46443179901229 | 200   | 140 | 0     | Open | ; |
| 27082            | 23862 |     | 24093 |      |   |
| 3.48561626886284 | 200   | 140 | 0     | Open | ; |
| 27083            | 21934 |     | 20739 |      |   |
| 3.49174732911336 | 110   | 150 | 0     | Open | ; |
| 27084            | 22329 |     | 21903 |      |   |
| 3.49588612643879 | 200   | 150 | 0     | Open | ; |
| 27085            | 24861 |     | 24562 |      |   |
| 3.56910241098999 | 140   | 150 | 0     | Open | ; |
| 27086            | 20042 |     | 20043 |      |   |
| 3.60266794895623 | 110   | 150 | 0     | Open | ; |
| 27087            | 22114 |     | 23059 |      |   |
| 3.60273936505635 | 110   | 150 | 0     | Open | ; |
| 27088            | 22646 |     | 22431 |      |   |
| 3.61439621512266 | 110   | 150 | 0     | Open | ; |
| 27089            | 23182 |     | 24710 |      |   |
| 3.61572648607165 | 200   | 150 | 0     | Open | ; |
| 27091            | 24298 |     | 24299 |      |   |
| 3.65583753079054 | 150   | 140 | 0     | Open | ; |
| 27092            | 24913 |     | 24914 |      |   |
| 3.69917054105801 | 75    | 100 | 0     | Open | ; |
| 27094            | 21385 |     | 18777 |      |   |
| 3.74434067899047 | 160   | 150 | 0     | Open | ; |
| 27095            | 20392 |     | 22398 |      |   |
| 3.76608218903557 | 200   | 150 | 0     | Open | ; |
| 27096            | 18600 |     | 21628 |      |   |
| 3.77664097242235 | 200   | 150 | 0     | Open | ; |
| 27097            | 18849 |     | 18850 |      |   |
| 3.77864182598539 | 110   | 150 | 0     | Open | ; |
| 27098            | 22696 |     | 23588 |      |   |
| 3.84574753220104 | 100   | 140 | 0     | Open | ; |
| 27099            | 24629 |     | 24628 |      |   |
| 3.87757901903075 | 160   | 150 | 0     | Open | ; |
| 27100            | 19024 |     | 18645 |      |   |
| 3.88012438549876 | 110   | 150 | 0     | Open | ; |
| 27101            | 20044 |     | 21930 |      |   |
| 3.90865695914897 | 110   | 150 | 0     | Open | ; |
| 27103            | 20335 |     | 20505 |      |   |
| 3.94435839818021 | 200   | 150 | 0     | Open | ; |
| 27104            | 18551 |     | 22183 |      |   |

|                     |       |     |       |      |   |
|---------------------|-------|-----|-------|------|---|
| 3.95230776809395    | 300   | 140 | 0     | Open | ; |
| 27105               | 18655 |     | 18656 |      |   |
| 3.96330665241902    | 110   | 150 | 0     | Open | ; |
| 27106               | 24042 |     | 18960 |      |   |
| 3.99918230918735    | 125   | 150 | 0     | Open | ; |
| 27107               | 21556 |     | 21522 |      |   |
| 3.99971328535958    | 160   | 150 | 0     | Open | ; |
| 27108               | 18919 |     | 23039 |      |   |
| 3.99978163618609    | 300   | 140 | 0     | Open | ; |
| 27109               | 22743 |     | 21957 |      |   |
| 3.9997820555804 110 |       | 150 | 0     | Open | ; |
| 27110               | 25146 |     | 19240 |      |   |
| 3.99991415228696    | 200   | 140 | 0     | Open | ; |
| 27111               | 19476 |     | 19472 |      |   |
| 3.99997065962812    | 200   | 140 | 0     | Open | ; |
| 27112               | 21359 |     | 24977 |      |   |
| 3.99999739243854    | 110   | 150 | 0     | Open | ; |
| 27113               | 23485 |     | 24959 |      |   |
| 4.00001616662511    | 200   | 140 | 0     | Open | ; |
| 27114               | 19653 |     | 21872 |      |   |
| 4.00026737239758    | 100   | 140 | 0     | Open | ; |
| 27115               | 23133 |     | 25042 |      |   |
| 4.00414486049733    | 315   | 150 | 0     | Open | ; |
| 27116               | 24619 |     | 24620 |      |   |
| 4.07714319864863    | 160   | 150 | 0     | Open | ; |
| 27117               | 20615 |     | 20617 |      |   |
| 4.10723032367438    | 110   | 150 | 0     | Open | ; |
| 27118               | 20468 |     | 19667 |      |   |
| 4.11250382207107    | 160   | 150 | 0     | Open | ; |
| 27119               | 21405 |     | 21406 |      |   |
| 4.12114309619283    | 400   | 130 | 0     | Open | ; |
| 27120               | 24808 |     | 24809 |      |   |
| 4.12972769125185    | 160   | 150 | 0     | Open | ; |
| 27121               | 23791 |     | 23519 |      |   |
| 4.13048568697275    | 100   | 140 | 0     | Open | ; |
| 27122               | 22319 |     | 22320 |      |   |
| 4.14848854958615    | 125   | 150 | 0     | Open | ; |
| 27123               | 19849 |     | 19058 |      |   |
| 4.15318951530735    | 160   | 150 | 0     | Open | ; |
| 27124               | 20622 |     | 20624 |      |   |
| 4.15546032262398    | 110   | 150 | 0     | Open | ; |
| 27125               | 20000 |     | 19062 |      |   |
| 4.20039842923743    | 140   | 150 | 0     | Open | ; |
| 27126               | 23156 |     | 23157 |      |   |
| 4.21084487652513    | 110   | 150 | 0     | Open | ; |
| 27127               | 22172 |     | 22174 |      |   |
| 4.23085060053263    | 200   | 140 | 0     | Open | ; |
| 27128               | 20337 |     | 20931 |      |   |
| 4.23344023917734    | 110   | 150 | 0     | Open | ; |
| 27129               | 21380 |     | 21381 |      |   |

|                     |       |     |       |      |   |
|---------------------|-------|-----|-------|------|---|
| 4.24102348128463    | 300   | 140 | 0     | Open | ; |
| 27130               | 18932 |     | 18933 |      |   |
| 4.2414676950404 500 |       | 130 | 0     | Open | ; |
| 27131               | 20627 |     | 20938 |      |   |
| 4.2653953829897 200 |       | 150 | 0     | Open | ; |
| 27132               | 20293 |     | 20500 |      |   |
| 4.27314545196302    | 150   | 140 | 0     | Open | ; |
| 27133               | 24921 |     | 24922 |      |   |
| 4.28043600171428    | 110   | 150 | 0     | Open | ; |
| 27134               | 20696 |     | 20697 |      |   |
| 4.29072299902588    | 110   | 150 | 0     | Open | ; |
| 27135               | 20468 |     | 22498 |      |   |
| 4.32689792130685    | 160   | 150 | 0     | Open | ; |
| 27136               | 24925 |     | 24926 |      |   |
| 4.35230274427816    | 110   | 150 | 0     | Open | ; |
| 27137               | 20699 |     | 20700 |      |   |
| 4.39118038413588    | 200   | 150 | 0     | Open | ; |
| 27138               | 24867 |     | 24306 |      |   |
| 4.44257494432629    | 75    | 150 | 0     | Open | ; |
| 27139               | 24889 |     | 24875 |      |   |
| 4.49643847998219    | 200   | 150 | 0     | Open | ; |
| 27140               | 22192 |     | 22186 |      |   |
| 6.41114168803822    | 110   | 150 | 0     | Open | ; |
| 27141               | 18856 |     | 21728 |      |   |
| 4.53661914348358    | 140   | 150 | 0     | Open | ; |
| 27142               | 24730 |     | 24725 |      |   |
| 4.58796714958832    | 110   | 150 | 0     | Open | ; |
| 27143               | 23164 |     | 24428 |      |   |
| 4.6053970099609 110 |       | 150 | 0     | Open | ; |
| 27144               | 19383 |     | 21584 |      |   |
| 4.61898356404762    | 250   | 140 | 0     | Open | ; |
| 27145               | 20139 |     | 18526 |      |   |
| 4.62857003409069    | 110   | 150 | 0     | Open | ; |
| 27146               | 23625 |     | 22662 |      |   |
| 4.69788190622107    | 125   | 140 | 0     | Open | ; |
| 27147               | 18666 |     | 24907 |      |   |
| 4.75663785137278    | 100   | 100 | 0     | Open | ; |
| 27148               | 20330 |     | 22427 |      |   |
| 4.76713980469977    | 110   | 150 | 0     | Open | ; |
| 27149               | 19944 |     | 23378 |      |   |
| 4.79967979129502    | 110   | 150 | 0     | Open | ; |
| 27151               | 20582 |     | 24834 |      |   |
| 4.8609153462518 100 |       | 140 | 0     | Open | ; |
| 27152               | 24773 |     | 24362 |      |   |
| 4.86579631721258    | 110   | 150 | 0     | Open | ; |
| 27153               | 20331 |     | 20332 |      |   |
| 4.91397687531923    | 200   | 150 | 0     | Open | ; |
| 27154               | 22703 |     | 20394 |      |   |
| 4.91418176861742    | 200   | 150 | 0     | Open | ; |
| 27155               | 23047 |     | 23048 |      |   |

|                     |       |     |       |      |   |
|---------------------|-------|-----|-------|------|---|
| 4.92377953716804    | 100   | 140 | 0     | Open | ; |
| 27156               | 20201 |     | 20202 |      |   |
| 4.96862422907849    | 150   | 140 | 0     | Open | ; |
| 27157               | 21120 |     | 21447 |      |   |
| 4.97333521589276    | 100   | 140 | 0     | Open | ; |
| 27158               | 19406 |     | 19407 |      |   |
| 4.99204232039583    | 100   | 140 | 0     | Open | ; |
| 27159               | 18645 |     | 18646 |      |   |
| 4.99484417096471    | 110   | 150 | 0     | Open | ; |
| 27160               | 20657 |     | 20761 |      |   |
| 4.99681475547924    | 110   | 150 | 0     | Open | ; |
| 27161               | 21326 |     | 23590 |      |   |
| 4.99925559691259    | 100   | 140 | 0     | Open | ; |
| 27162               | 21219 |     | 21220 |      |   |
| 4.99958093594114    | 100   | 140 | 0     | Open | ; |
| 27163               | 21231 |     | 22171 |      |   |
| 4.99961704619087    | 450   | 130 | 0     | Open | ; |
| 27164               | 18499 |     | 21465 |      |   |
| 4.99962688222222    | 110   | 150 | 0     | Open | ; |
| 27165               | 21619 |     | 18561 |      |   |
| 4.99965477220411    | 110   | 150 | 0     | Open | ; |
| 27166               | 18714 |     | 18715 |      |   |
| 4.9996672603506 100 |       | 140 | 0     | Open | ; |
| 27167               | 21316 |     | 21174 |      |   |
| 4.99967587065393    | 110   | 150 | 0     | Open | ; |
| 27168               | 22423 |     | 21068 |      |   |
| 4.99968220677289    | 100   | 140 | 0     | Open | ; |
| 27169               | 22930 |     | 22931 |      |   |
| 4.99968737467792    | 110   | 150 | 0     | Open | ; |
| 27170               | 21414 |     | 23292 |      |   |
| 4.99968966170159    | 100   | 140 | 0     | Open | ; |
| 27171               | 22250 |     | 20367 |      |   |
| 4.999722049059 200  |       | 140 | 0     | Open | ; |
| 27172               | 23364 |     | 23365 |      |   |
| 4.99972377721765    | 110   | 150 | 0     | Open | ; |
| 27173               | 23790 |     | 20001 |      |   |
| 4.99973068117739    | 150   | 140 | 0     | Open | ; |
| 27174               | 20064 |     | 20065 |      |   |
| 4.99974171922277    | 125   | 140 | 0     | Open | ; |
| 27175               | 20257 |     | 23464 |      |   |
| 4.99976248428854    | 125   | 150 | 0     | Open | ; |
| 27176               | 20081 |     | 20082 |      |   |
| 4.99977472533656    | 110   | 150 | 0     | Open | ; |
| 27177               | 23385 |     | 23483 |      |   |
| 4.99978689146562    | 100   | 140 | 0     | Open | ; |
| 27178               | 22865 |     | 22866 |      |   |
| 4.99979222231936    | 100   | 140 | 0     | Open | ; |
| 27179               | 22821 |     | 20129 |      |   |
| 4.99979478485885    | 160   | 150 | 0     | Open | ; |
| 27180               | 24818 |     | 24819 |      |   |

|                     |       |     |       |      |   |
|---------------------|-------|-----|-------|------|---|
| 4.99999984825851    | 160   | 150 | 0     | Open | ; |
| 27181               | 24820 |     | 24822 |      |   |
| 5.00001911357192    | 160   | 150 | 0     | Open | ; |
| 27182               | 20993 |     | 18638 |      |   |
| 5.00251073196434    | 100   | 140 | 0     | Open | ; |
| 27183               | 20991 |     | 19341 |      |   |
| 5.01063786496189    | 125   | 140 | 0     | Open | ; |
| 27184               | 22056 |     | 22057 |      |   |
| 5.02097373294719    | 200   | 150 | 0     | Open | ; |
| 27185               | 21033 |     | 21317 |      |   |
| 5.03660400099871    | 75    | 140 | 0     | Open | ; |
| 27186               | 20707 |     | 20708 |      |   |
| 5.03664168275824    | 200   | 150 | 0     | Open | ; |
| 27187               | 22629 |     | 18951 |      |   |
| 5.0415309819031 110 |       | 150 | 0     | Open | ; |
| 27188               | 18954 |     | 22629 |      |   |
| 5.04153098193505    | 110   | 150 | 0     | Open | ; |
| 27189               | 20332 |     | 20930 |      |   |
| 5.05357006161697    | 200   | 150 | 0     | Open | ; |
| 27190               | 22065 |     | 22066 |      |   |
| 5.06654192580031    | 450   | 140 | 0     | Open | ; |
| 27191               | 18752 |     | 18862 |      |   |
| 5.08439112657884    | 100   | 140 | 0     | Open | ; |
| 27192               | 24882 |     | 24832 |      |   |
| 5.09705116712373    | 110   | 150 | 0     | Open | ; |
| 27193               | 20632 |     | 19083 |      |   |
| 5.10378796519629    | 75    | 150 | 0     | Open | ; |
| 27194               | 22291 |     | 18732 |      |   |
| 5.11424411780952    | 140   | 150 | 0     | Open | ; |
| 27195               | 21226 |     | 22701 |      |   |
| 4.24507095506461    | 110   | 150 | 0     | Open | ; |
| 27196               | 18812 |     | 21481 |      |   |
| 5.20046230655887    | 110   | 150 | 0     | Open | ; |
| 27197               | 19698 |     | 19429 |      |   |
| 5.20053430452604    | 140   | 150 | 0     | Open | ; |
| 27198               | 20542 |     | 20543 |      |   |
| 5.23376374196969    | 110   | 150 | 0     | Open | ; |
| 27199               | 20875 |     | 22951 |      |   |
| 5.24094832721117    | 200   | 150 | 0     | Open | ; |
| 27200               | 20959 |     | 19719 |      |   |
| 5.24633975412153    | 110   | 150 | 0     | Open | ; |
| 27201               | 21680 |     | 21123 |      |   |
| 5.3271383334016 140 |       | 150 | 0     | Open | ; |
| 27202               | 23253 |     | 19729 |      |   |
| 5.35124058599767    | 110   | 150 | 0     | Open | ; |
| 27203               | 18570 |     | 19143 |      |   |
| 5.35278183594731    | 110   | 150 | 0     | Open | ; |
| 27204               | 20413 |     | 22876 |      |   |
| 5.35806182292113    | 100   | 140 | 0     | Open | ; |
| 27205               | 20243 |     | 20285 |      |   |

|                     |       |     |       |      |   |
|---------------------|-------|-----|-------|------|---|
| 5.39497355417218    | 110   | 150 | 0     | Open | ; |
| 27206               | 20701 |     | 20702 |      |   |
| 5.44838980220033    | 200   | 150 | 0     | Open | ; |
| 27207               | 20341 |     | 20342 |      |   |
| 5.44968905484488    | 160   | 150 | 0     | Open | ; |
| 27208               | 24695 |     | 24694 |      |   |
| 5.48131372569247    | 160   | 150 | 0     | Open | ; |
| 27209               | 18904 |     | 22860 |      |   |
| 5.48951491688561    | 75    | 150 | 0     | Open | ; |
| 27210               | 19730 |     | 19731 |      |   |
| 5.49950005745372    | 110   | 150 | 0     | Open | ; |
| 27211               | 22523 |     | 19038 |      |   |
| 5.51180596291217    | 100   | 140 | 0     | Open | ; |
| 27212               | 20849 |     | 20850 |      |   |
| 5.53351236926851    | 110   | 150 | 0     | Open | ; |
| 27213               | 21729 |     | 22971 |      |   |
| 5.58977165337178    | 75    | 140 | 0     | Open | ; |
| 27214               | 18677 |     | 18679 |      |   |
| 5.62092594771508    | 160   | 150 | 0     | Open | ; |
| 27215               | 24558 |     | 18577 |      |   |
| 5.65267088229183    | 110   | 150 | 0     | Open | ; |
| 27216               | 19397 |     | 19391 |      |   |
| 5.65968191702507    | 110   | 150 | 0     | Open | ; |
| 27217               | 18474 |     | 22025 |      |   |
| 5.67168204793374    | 125   | 150 | 0     | Open | ; |
| 27218               | 19876 |     | 22934 |      |   |
| 7.15718580267058    | 110   | 150 | 0     | Open | ; |
| 27219               | 22534 |     | 19677 |      |   |
| 5.7010263808581 75  |       | 140 | 0     | Open | ; |
| 27220               | 18611 |     | 21151 |      |   |
| 5.73370376838097    | 160   | 150 | 0     | Open | ; |
| 27221               | 19497 |     | 23501 |      |   |
| 5.8096932141422 75  |       | 150 | 0     | Open | ; |
| 27222               | 20233 |     | 23958 |      |   |
| 5.82671563937743    | 125   | 140 | 0     | Open | ; |
| 27223               | 22538 |     | 22612 |      |   |
| 5.83238616133475    | 110   | 150 | 0     | Open | ; |
| 27224               | 22805 |     | 22905 |      |   |
| 5.84174649930643    | 100   | 140 | 0     | Open | ; |
| 27225               | 19725 |     | 18684 |      |   |
| 5.91432399542596    | 100   | 140 | 0     | Open | ; |
| 27226               | 23000 |     | 22856 |      |   |
| 5.9157738938196 100 |       | 140 | 0     | Open | ; |
| 27227               | 18862 |     | 18863 |      |   |
| 5.96246893200227    | 100   | 140 | 0     | Open | ; |
| 27228               | 19696 |     | 22046 |      |   |
| 5.98124763674247    | 75    | 140 | 0     | Open | ; |
| 27229               | 18828 |     | 21547 |      |   |
| 5.99513442111098    | 160   | 150 | 0     | Open | ; |
| 27230               | 24256 |     | 24223 |      |   |

|                     |       |     |       |      |   |
|---------------------|-------|-----|-------|------|---|
| 5.99949097324269    | 110   | 150 | 0     | Open | ; |
| 27231               | 23876 |     | 23877 |      |   |
| 5.99955567794984    | 125   | 100 | 0     | Open | ; |
| 27232               | 21668 |     | 21669 |      |   |
| 5.99961001473407    | 75    | 150 | 0     | Open | ; |
| 27233               | 19886 |     | 20097 |      |   |
| 5.99961393867326    | 200   | 150 | 0     | Open | ; |
| 27234               | 20101 |     | 20099 |      |   |
| 5.99962328949763    | 200   | 150 | 0     | Open | ; |
| 27235               | 20860 |     | 18674 |      |   |
| 5.9996360222347 100 |       | 140 | 0     | Open | ; |
| 27236               | 20076 |     | 20077 |      |   |
| 5.9996410327327 160 |       | 150 | 0     | Open | ; |
| 27237               | 21135 |     | 21136 |      |   |
| 5.99967295721173    | 110   | 150 | 0     | Open | ; |
| 27238               | 22726 |     | 24108 |      |   |
| 6.00117547772787    | 110   | 150 | 0     | Open | ; |
| 27239               | 20872 |     | 22212 |      |   |
| 6.00693739401307    | 100   | 140 | 0     | Open | ; |
| 27240               | 21868 |     | 19942 |      |   |
| 6.00696040343756    | 100   | 140 | 0     | Open | ; |
| 27241               | 22739 |     | 22786 |      |   |
| 6.01317250886059    | 110   | 150 | 0     | Open | ; |
| 27242               | 18980 |     | 23275 |      |   |
| 6.02917597427038    | 110   | 150 | 0     | Open | ; |
| 27243               | 22257 |     | 22259 |      |   |
| 6.03477394210065    | 110   | 150 | 0     | Open | ; |
| 27244               | 21723 |     | 18698 |      |   |
| 6.03598581330478    | 100   | 130 | 0     | Open | ; |
| 27245               | 24626 |     | 24627 |      |   |
| 6.05699980004869    | 110   | 150 | 0     | Open | ; |
| 27246               | 19185 |     | 23972 |      |   |
| 6.0693121962489 110 |       | 150 | 0     | Open | ; |
| 27247               | 18960 |     | 18958 |      |   |
| 6.0972718486864 110 |       | 150 | 0     | Open | ; |
| 27248               | 23205 |     | 23206 |      |   |
| 6.09889325693434    | 140   | 150 | 0     | Open | ; |
| 27249               | 18569 |     | 22260 |      |   |
| 6.11538187575133    | 110   | 150 | 0     | Open | ; |
| 27250               | 22190 |     | 22263 |      |   |
| 8.01192025488723    | 150   | 140 | 0     | Open | ; |
| 27251               | 23469 |     | 21813 |      |   |
| 6.1206033494903 300 |       | 140 | 0     | Open | ; |
| 27252               | 24291 |     | 24816 |      |   |
| 6.12775203564346    | 110   | 150 | 0     | Open | ; |
| 27253               | 19326 |     | 19296 |      |   |
| 6.13859413963474    | 140   | 150 | 0     | Open | ; |
| 27254               | 23898 |     | 23899 |      |   |
| 6.20333273357594    | 75    | 140 | 0     | Open | ; |
| 27255               | 24296 |     | 19182 |      |   |

|                     |       |     |       |      |   |
|---------------------|-------|-----|-------|------|---|
| 6.21875523294332    | 100   | 140 | 0     | Open | ; |
| 27256               | 24362 |     | 24361 |      |   |
| 6.24472331668124    | 110   | 150 | 0     | Open | ; |
| 27257               | 20358 |     | 22302 |      |   |
| 6.2560320740287 160 |       | 150 | 0     | Open | ; |
| 27258               | 24948 |     | 20457 |      |   |
| 6.27312095360475    | 200   | 140 | 0     | Open | ; |
| 27259               | 24768 |     | 24785 |      |   |
| 6.27691157218152    | 160   | 150 | 0     | Open | ; |
| 27260               | 21844 |     | 21159 |      |   |
| 7.99249317901986    | 160   | 150 | 0     | Open | ; |
| 27261               | 24826 |     | 24435 |      |   |
| 6.31315192556531    | 110   | 150 | 0     | Open | ; |
| 27262               | 20932 |     | 20750 |      |   |
| 6.33230117183644    | 250   | 150 | 0     | Open | ; |
| 27263               | 24576 |     | 23158 |      |   |
| 6.33246827904107    | 110   | 150 | 0     | Open | ; |
| 27264               | 24436 |     | 24444 |      |   |
| 6.35471146206323    | 110   | 150 | 0     | Open | ; |
| 27265               | 21859 |     | 24189 |      |   |
| 6.40158177698981    | 150   | 100 | 0     | Open | ; |
| 27266               | 24645 |     | 24660 |      |   |
| 6.40383620156646    | 50    | 140 | 0     | Open | ; |
| 27267               | 22398 |     | 22897 |      |   |
| 6.42675756628005    | 200   | 150 | 0     | Open | ; |
| 27268               | 19270 |     | 19355 |      |   |
| 6.44322495165466    | 110   | 150 | 0     | Open | ; |
| 27269               | 25001 |     | 18853 |      |   |
| 8.0181184929479 160 |       | 150 | 0     | Open | ; |
| 27270               | 18463 |     | 18464 |      |   |
| 6.49394953070312    | 100   | 140 | 0     | Open | ; |
| 27271               | 20772 |     | 21873 |      |   |
| 6.50890051962205    | 75    | 140 | 0     | Open | ; |
| 27272               | 21128 |     | 21129 |      |   |
| 6.5660738231761 100 |       | 140 | 0     | Open | ; |
| 27273               | 24387 |     | 19551 |      |   |
| 6.65337163179534    | 110   | 150 | 0     | Open | ; |
| 27274               | 19123 |     | 20859 |      |   |
| 6.70192143253798    | 75    | 140 | 0     | Open | ; |
| 27275               | 20110 |     | 20111 |      |   |
| 6.77687458670748    | 75    | 150 | 0     | Open | ; |
| 27276               | 19743 |     | 23528 |      |   |
| 6.81162940949211    | 100   | 140 | 0     | Open | ; |
| 27277               | 18601 |     | 21629 |      |   |
| 6.817864418338 200  |       | 150 | 0     | Open | ; |
| 27278               | 22308 |     | 24280 |      |   |
| 6.82684038150989    | 110   | 150 | 0     | Open | ; |
| 27279               | 18545 |     | 18546 |      |   |
| 6.83535883233419    | 110   | 150 | 0     | Open | ; |
| 27280               | 24661 |     | 24636 |      |   |



|                     |       |     |       |      |   |
|---------------------|-------|-----|-------|------|---|
| 6.8650094733594 100 |       | 140 | 0     | Open | ; |
| 27281               | 19802 |     | 19803 |      |   |
| 6.87652322049132    | 200   | 150 | 0     | Open | ; |
| 27282               | 19515 |     | 19516 |      |   |
| 6.88575794523116    | 110   | 150 | 0     | Open | ; |
| 27283               | 24901 |     | 22171 |      |   |
| 6.90406869781784    | 450   | 100 | 0     | Open | ; |
| 27284               | 23086 |     | 23087 |      |   |
| 6.9056021463668 100 |       | 140 | 0     | Open | ; |
| 27285               | 24197 |     | 23732 |      |   |
| 6.91116072397615    | 110   | 150 | 0     | Open | ; |
| 27287               | 18698 |     | 18699 |      |   |
| 6.92534559428856    | 100   | 130 | 0     | Open | ; |
| 27288               | 25057 |     | 25058 |      |   |
| 9.08088059545483    | 350   | 140 | 0     | Open | ; |
| 27289               | 23913 |     | 22230 |      |   |
| 6.93370358206798    | 75    | 150 | 0     | Open | ; |
| 27290               | 22080 |     | 19571 |      |   |
| 6.9624378131145 110 |       | 150 | 0     | Open | ; |
| 27291               | 20740 |     | 24947 |      |   |
| 9.91215175772617    | 110   | 150 | 0     | Open | ; |
| 27292               | 23914 |     | 22881 |      |   |
| 6.99436533929917    | 110   | 150 | 0     | Open | ; |
| 27293               | 19404 |     | 19405 |      |   |
| 6.99955106637616    | 100   | 140 | 0     | Open | ; |
| 27294               | 19298 |     | 19299 |      |   |
| 6.99955785468034    | 160   | 150 | 0     | Open | ; |
| 27295               | 23207 |     | 23650 |      |   |
| 6.99960354674952    | 100   | 140 | 0     | Open | ; |
| 27296               | 20191 |     | 23545 |      |   |
| 7.0281735261063 150 |       | 140 | 0     | Open | ; |
| 27297               | 19294 |     | 20435 |      |   |
| 7.05006342645297    | 100   | 140 | 0     | Open | ; |
| 27298               | 21113 |     | 23687 |      |   |
| 7.05052567675361    | 110   | 150 | 0     | Open | ; |
| 27299               | 23429 |     | 19560 |      |   |
| 7.05341781927791    | 150   | 140 | 0     | Open | ; |
| 27300               | 24160 |     | 24814 |      |   |
| 7.05977434994649    | 110   | 150 | 0     | Open | ; |
| 27301               | 21254 |     | 21255 |      |   |
| 7.0882478542093 110 |       | 150 | 0     | Open | ; |
| 27302               | 21854 |     | 19052 |      |   |
| 7.13450395909199    | 125   | 140 | 0     | Open | ; |
| 27303               | 20770 |     | 20771 |      |   |
| 7.13908924144314    | 110   | 150 | 0     | Open | ; |
| 27304               | 24677 |     | 24678 |      |   |
| 7.16790990727189    | 110   | 150 | 0     | Open | ; |
| 27305               | 18649 |     | 18650 |      |   |
| 7.19579807988203    | 250   | 100 | 0     | Open | ; |
| 27306               | 23409 |     | 18974 |      |   |

|                     |       |     |       |      |   |
|---------------------|-------|-----|-------|------|---|
| 7.22255991391823    | 100   | 140 | 0     | Open | ; |
| 27307               | 25008 |     | 24997 |      |   |
| 8.97948546665764    | 140   | 150 | 0     | Open | ; |
| 27308               | 21067 |     | 21068 |      |   |
| 7.2541662720509 100 |       | 140 | 0     | Open | ; |
| 27309               | 21995 |     | 21140 |      |   |
| 7.26783008610916    | 100   | 140 | 0     | Open | ; |
| 27310               | 20692 |     | 20686 |      |   |
| 7.27167002881122    | 250   | 150 | 0     | Open | ; |
| 27311               | 23499 |     | 23500 |      |   |
| 7.27801571487109    | 160   | 150 | 0     | Open | ; |
| 27312               | 21449 |     | 19941 |      |   |
| 7.3041323125014 100 |       | 140 | 0     | Open | ; |
| 27313               | 24865 |     | 24033 |      |   |
| 7.33188207325265    | 250   | 100 | 0     | Open | ; |
| 27314               | 18826 |     | 18827 |      |   |
| 7.36308668036106    | 110   | 150 | 0     | Open | ; |
| 27315               | 24894 |     | 24895 |      |   |
| 7.5803240737251 100 |       | 140 | 0     | Open | ; |
| 27316               | 18920 |     | 18921 |      |   |
| 7.36522385888624    | 250   | 140 | 0     | Open | ; |
| 27317               | 23201 |     | 20179 |      |   |
| 7.37998524912731    | 160   | 150 | 0     | Open | ; |
| 27318               | 21122 |     | 20000 |      |   |
| 7.38235061257955    | 140   | 150 | 0     | Open | ; |
| 27319               | 24386 |     | 19124 |      |   |
| 9.13202597843061    | 100   | 140 | 0     | Open | ; |
| 27320               | 19505 |     | 23330 |      |   |
| 7.40151297574514    | 100   | 140 | 0     | Open | ; |
| 27321               | 19940 |     | 21076 |      |   |
| 7.44551524698407    | 160   | 150 | 0     | Open | ; |
| 27322               | 22701 |     | 20838 |      |   |
| 7.4492560941592 110 |       | 150 | 0     | Open | ; |
| 27323               | 19970 |     | 19971 |      |   |
| 7.4605784557195 140 |       | 150 | 0     | Open | ; |
| 27324               | 24753 |     | 24790 |      |   |
| 7.48290608834484    | 110   | 150 | 0     | Open | ; |
| 27325               | 23066 |     | 20576 |      |   |
| 7.49952559134495    | 160   | 150 | 0     | Open | ; |
| 27326               | 19676 |     | 25044 |      |   |
| 9.92118943406827    | 300   | 140 | 0     | Open | ; |
| 27327               | 22684 |     | 22122 |      |   |
| 7.53072076368382    | 150   | 140 | 0     | Open | ; |
| 27328               | 24553 |     | 24555 |      |   |
| 7.54058984750821    | 200   | 150 | 0     | Open | ; |
| 27330               | 23434 |     | 22601 |      |   |
| 7.56045566561143    | 160   | 150 | 0     | Open | ; |
| 27331               | 22636 |     | 18731 |      |   |
| 7.56355118289185    | 160   | 150 | 0     | Open | ; |
| 27332               | 18694 |     | 18695 |      |   |

|                     |       |     |       |      |   |
|---------------------|-------|-----|-------|------|---|
| 7.58230227569306    | 160   | 150 | 0     | Open | ; |
| 27333               | 18773 |     | 18774 |      |   |
| 7.5890281330284 100 |       | 140 | 0     | Open | ; |
| 27334               | 18814 |     | 18829 |      |   |
| 7.60687043755387    | 75    | 150 | 0     | Open | ; |
| 27335               | 23287 |     | 19980 |      |   |
| 7.65678147168216    | 110   | 150 | 0     | Open | ; |
| 27336               | 19308 |     | 19307 |      |   |
| 7.65768669584866    | 100   | 140 | 0     | Open | ; |
| 27337               | 22929 |     | 23462 |      |   |
| 7.67193790907656    | 110   | 150 | 0     | Open | ; |
| 27338               | 20318 |     | 20317 |      |   |
| 7.69041502483325    | 110   | 150 | 0     | Open | ; |
| 27339               | 21206 |     | 21207 |      |   |
| 7.69945497924485    | 75    | 150 | 0     | Open | ; |
| 27340               | 23623 |     | 23624 |      |   |
| 7.72939600896253    | 350   | 130 | 0     | Open | ; |
| 27341               | 18867 |     | 18868 |      |   |
| 7.73812733554286    | 75    | 140 | 0     | Open | ; |
| 27342               | 21137 |     | 21138 |      |   |
| 7.7454395938079 75  |       | 150 | 0     | Open | ; |
| 27343               | 24429 |     | 23065 |      |   |
| 7.74942060453653    | 200   | 150 | 0     | Open | ; |
| 27344               | 23069 |     | 23070 |      |   |
| 7.75371431684652    | 150   | 140 | 0     | Open | ; |
| 27345               | 18619 |     | 21793 |      |   |
| 7.75591103260529    | 100   | 140 | 0     | Open | ; |
| 27346               | 23025 |     | 24915 |      |   |
| 7.76140142573967    | 100   | 140 | 0     | Open | ; |
| 27347               | 24524 |     | 24525 |      |   |
| 7.77463267623353    | 110   | 150 | 0     | Open | ; |
| 27348               | 22193 |     | 22863 |      |   |
| 7.69308681482721    | 125   | 140 | 0     | Open | ; |
| 27349               | 24728 |     | 24729 |      |   |
| 7.78622387140937    | 110   | 150 | 0     | Open | ; |
| 27350               | 19452 |     | 19453 |      |   |
| 7.81016121755014    | 125   | 140 | 0     | Open | ; |
| 27351               | 22172 |     | 22173 |      |   |
| 7.83044227903177    | 150   | 140 | 0     | Open | ; |
| 27352               | 22397 |     | 20536 |      |   |
| 7.83355470807171    | 110   | 150 | 0     | Open | ; |
| 27353               | 23541 |     | 23542 |      |   |
| 7.85723531616225    | 75    | 140 | 0     | Open | ; |
| 27354               | 19031 |     | 22898 |      |   |
| 7.86495009467689    | 200   | 150 | 0     | Open | ; |
| 27355               | 20883 |     | 22239 |      |   |
| 7.86923215615641    | 110   | 150 | 0     | Open | ; |
| 27356               | 24791 |     | 24658 |      |   |
| 10.4344752452488    | 110   | 150 | 0     | Open | ; |
| 27357               | 19807 |     | 20090 |      |   |

|                  |       |     |       |      |   |
|------------------|-------|-----|-------|------|---|
| 7.92827239354977 | 100   | 140 | 0     | Open | ; |
| 27358            | 24550 |     | 24551 |      |   |
| 7.93901871572176 | 200   | 150 | 0     | Open | ; |
| 27359            | 19817 |     | 19818 |      |   |
| 7.95423538603981 | 250   | 140 | 0     | Open | ; |
| 27360            | 20429 |     | 19323 |      |   |
| 7.9586206355791  | 140   | 150 | 0     | Open | ; |
| 27361            | 19257 |     | 19258 |      |   |
| 7.98437052276122 | 100   | 140 | 0     | Open | ; |
| 27362            | 22083 |     | 22084 |      |   |
| 7.99926175290767 | 100   | 140 | 0     | Open | ; |
| 27363            | 21126 |     | 21127 |      |   |
| 7.99939318312881 | 100   | 140 | 0     | Open | ; |
| 27364            | 22332 |     | 22941 |      |   |
| 7.99945445439014 | 110   | 150 | 0     | Open | ; |
| 27366            | 21938 |     | 22685 |      |   |
| 7.99950056335367 | 125   | 150 | 0     | Open | ; |
| 27367            | 23785 |     | 23786 |      |   |
| 7.99950181355255 | 125   | 140 | 0     | Open | ; |
| 27368            | 21748 |     | 23242 |      |   |
| 7.99951528372397 | 100   | 140 | 0     | Open | ; |
| 27369            | 18675 |     | 23652 |      |   |
| 7.99952378107392 | 100   | 140 | 0     | Open | ; |
| 27370            | 22372 |     | 22373 |      |   |
| 7.99952688675605 | 140   | 150 | 0     | Open | ; |
| 27371            | 21046 |     | 21047 |      |   |
| 7.99953304962001 | 100   | 140 | 0     | Open | ; |
| 27372            | 18607 |     | 21456 |      |   |
| 7.99953752807305 | 160   | 150 | 0     | Open | ; |
| 27373            | 21726 |     | 21727 |      |   |
| 7.99956634448178 | 160   | 150 | 0     | Open | ; |
| 27374            | 19997 |     | 22831 |      |   |
| 7.99957239599631 | 300   | 140 | 0     | Open | ; |
| 27375            | 21669 |     | 21670 |      |   |
| 7.99959013418944 | 75    | 150 | 0     | Open | ; |
| 27376            | 22915 |     | 22916 |      |   |
| 7.99970897989808 | 100   | 140 | 0     | Open | ; |
| 27377            | 19064 |     | 21045 |      |   |
| 7.99998055744562 | 140   | 150 | 0     | Open | ; |
| 27378            | 21124 |     | 20715 |      |   |
| 8.00033160928485 | 200   | 140 | 0     | Open | ; |
| 27379            | 19852 |     | 20600 |      |   |
| 8.00150158392472 | 75    | 140 | 0     | Open | ; |
| 27380            | 23349 |     | 23350 |      |   |
| 8.00246119979714 | 75    | 140 | 0     | Open | ; |
| 27381            | 24865 |     | 24866 |      |   |
| 8.00298579270232 | 150   | 100 | 0     | Open | ; |
| 27382            | 19567 |     | 25027 |      |   |
| 8.00489434276028 | 110   | 150 | 0     | Open | ; |
| 27383            | 22162 |     | 20462 |      |   |

|                     |       |     |       |      |   |
|---------------------|-------|-----|-------|------|---|
| 8.00898388792094    | 200   | 150 | 0     | Open | ; |
| 27384               | 23293 |     | 23294 |      |   |
| 8.01101756112767    | 100   | 140 | 0     | Open | ; |
| 27385               | 18517 |     | 18518 |      |   |
| 8.01836572238724    | 110   | 150 | 0     | Open | ; |
| 27386               | 21946 |     | 22867 |      |   |
| 8.04248101661706    | 110   | 150 | 0     | Open | ; |
| 27387               | 23163 |     | 24594 |      |   |
| 8.05394299228155    | 110   | 150 | 0     | Open | ; |
| 27388               | 22592 |     | 20619 |      |   |
| 8.06191773844909    | 110   | 150 | 0     | Open | ; |
| 27389               | 24302 |     | 18606 |      |   |
| 8.07149237496397    | 160   | 150 | 0     | Open | ; |
| 27390               | 19454 |     | 19455 |      |   |
| 8.07187196438601    | 110   | 150 | 0     | Open | ; |
| 27391               | 24407 |     | 24409 |      |   |
| 8.09395295288049    | 110   | 150 | 0     | Open | ; |
| 27392               | 23569 |     | 23570 |      |   |
| 8.11387984758664    | 110   | 150 | 0     | Open | ; |
| 27393               | 23863 |     | 23586 |      |   |
| 8.12744915253349    | 75    | 140 | 0     | Open | ; |
| 27394               | 23853 |     | 22830 |      |   |
| 8.1539083980325 75  |       | 140 | 0     | Open | ; |
| 27395               | 20192 |     | 19504 |      |   |
| 8.2242996645815 100 |       | 140 | 0     | Open | ; |
| 27396               | 22706 |     | 20390 |      |   |
| 8.22575588517754    | 200   | 150 | 0     | Open | ; |
| 27397               | 24405 |     | 24406 |      |   |
| 8.23708470699398    | 160   | 150 | 0     | Open | ; |
| 27398               | 22464 |     | 22698 |      |   |
| 8.27621067144896    | 110   | 150 | 0     | Open | ; |
| 27399               | 24912 |     | 24069 |      |   |
| 8.27899030680481    | 100   | 140 | 0     | Open | ; |
| 27400               | 21076 |     | 21077 |      |   |
| 8.28573615832362    | 160   | 150 | 0     | Open | ; |
| 27401               | 24618 |     | 24654 |      |   |
| 8.29395960498817    | 110   | 150 | 0     | Open | ; |
| 27402               | 23808 |     | 23809 |      |   |
| 8.2966311439315 200 |       | 100 | 0     | Open | ; |
| 27403               | 24610 |     | 24611 |      |   |
| 8.29993089292585    | 110   | 150 | 0     | Open | ; |
| 27404               | 22808 |     | 22764 |      |   |
| 8.30173062938634    | 200   | 150 | 0     | Open | ; |
| 27405               | 24604 |     | 23162 |      |   |
| 8.31452197688807    | 100   | 140 | 0     | Open | ; |
| 27406               | 21474 |     | 21475 |      |   |
| 8.33756780148772    | 160   | 150 | 0     | Open | ; |
| 27407               | 19455 |     | 18700 |      |   |
| 8.35406873424348    | 110   | 150 | 0     | Open | ; |
| 27408               | 24913 |     | 23069 |      |   |

|                     |       |     |       |      |   |
|---------------------|-------|-----|-------|------|---|
| 8.35646888590284    | 150   | 140 | 0     | Open | ; |
| 27409               | 19861 |     | 22980 |      |   |
| 8.36351028712646    | 75    | 150 | 0     | Open | ; |
| 27410               | 22783 |     | 20709 |      |   |
| 8.40966683418474    | 200   | 150 | 0     | Open | ; |
| 27411               | 24749 |     | 19702 |      |   |
| 8.41512922917592    | 160   | 150 | 0     | Open | ; |
| 27412               | 24739 |     | 24741 |      |   |
| 8.42448493252823    | 110   | 150 | 0     | Open | ; |
| 27413               | 19368 |     | 19369 |      |   |
| 8.45156545624077    | 110   | 150 | 0     | Open | ; |
| 27414               | 24776 |     | 24777 |      |   |
| 8.45627645147778    | 110   | 150 | 0     | Open | ; |
| 27415               | 22693 |     | 19890 |      |   |
| 8.5150400241596 200 |       | 150 | 0     | Open | ; |
| 27416               | 22908 |     | 18635 |      |   |
| 8.54182925679706    | 125   | 140 | 0     | Open | ; |
| 27417               | 21838 |     | 23919 |      |   |
| 8.55611307148002    | 100   | 140 | 0     | Open | ; |
| 27418               | 23866 |     | 23088 |      |   |
| 8.57679049408343    | 110   | 150 | 0     | Open | ; |
| 27419               | 23651 |     | 20360 |      |   |
| 8.60535342707129    | 100   | 140 | 0     | Open | ; |
| 27420               | 19310 |     | 19311 |      |   |
| 8.62632133948085    | 200   | 150 | 0     | Open | ; |
| 27421               | 20161 |     | 20162 |      |   |
| 8.636154598772 300  |       | 140 | 0     | Open | ; |
| 27422               | 18479 |     | 24974 |      |   |
| 12.1534541385853    | 300   | 140 | 0     | Open | ; |
| 27423               | 25133 |     | 23161 |      |   |
| 11.0449285705758    | 110   | 150 | 0     | Open | ; |
| 27424               | 23080 |     | 23081 |      |   |
| 8.68120055034253    | 75    | 140 | 0     | Open | ; |
| 27425               | 23094 |     | 18726 |      |   |
| 8.68620228384318    | 100   | 140 | 0     | Open | ; |
| 27426               | 20753 |     | 22380 |      |   |
| 8.71496303692319    | 160   | 150 | 0     | Open | ; |
| 27427               | 24910 |     | 20256 |      |   |
| 8.73829260153598    | 160   | 150 | 0     | Open | ; |
| 27428               | 19392 |     | 19393 |      |   |
| 8.76175627831919    | 110   | 150 | 0     | Open | ; |
| 27429               | 22482 |     | 24908 |      |   |
| 8.77117803062274    | 350   | 140 | 0     | Open | ; |
| 27430               | 21167 |     | 21168 |      |   |
| 8.77967484049805    | 110   | 150 | 0     | Open | ; |
| 27431               | 24599 |     | 24602 |      |   |
| 8.79938058344202    | 125   | 140 | 0     | Open | ; |
| 27432               | 18833 |     | 23004 |      |   |
| 8.82387015039345    | 75    | 150 | 0     | Open | ; |
| 27433               | 20914 |     | 24208 |      |   |

|                     |       |     |       |      |   |
|---------------------|-------|-----|-------|------|---|
| 8.8831426524208 250 |       | 140 | 0     | Open | ; |
| 27434               | 22144 |     | 22145 |      |   |
| 8.88912169565044    | 110   | 150 | 0     | Open | ; |
| 27435               | 18482 |     | 19266 |      |   |
| 8.89336683165822    | 110   | 150 | 0     | Open | ; |
| 27436               | 24483 |     | 24487 |      |   |
| 8.90849212018692    | 110   | 150 | 0     | Open | ; |
| 27437               | 19174 |     | 19527 |      |   |
| 8.92337593791595    | 110   | 150 | 0     | Open | ; |
| 27438               | 21507 |     | 21508 |      |   |
| 8.97545480797517    | 110   | 150 | 0     | Open | ; |
| 27439               | 24826 |     | 23186 |      |   |
| 8.98317528944794    | 110   | 150 | 0     | Open | ; |
| 27440               | 19157 |     | 19158 |      |   |
| 8.99942938550012    | 125   | 150 | 0     | Open | ; |
| 27441               | 20198 |     | 20199 |      |   |
| 8.99952445985166    | 75    | 150 | 0     | Open | ; |
| 27442               | 18884 |     | 18885 |      |   |
| 8.99952515364467    | 160   | 150 | 0     | Open | ; |
| 27443               | 18476 |     | 18477 |      |   |
| 8.99954893588504    | 100   | 140 | 0     | Open | ; |
| 27444               | 21545 |     | 21546 |      |   |
| 9.02184653878855    | 110   | 150 | 0     | Open | ; |
| 27445               | 21320 |     | 23135 |      |   |
| 9.03151192297672    | 150   | 140 | 0     | Open | ; |
| 27446               | 20839 |     | 20466 |      |   |
| 9.04113575685646    | 140   | 150 | 0     | Open | ; |
| 27447               | 23885 |     | 23886 |      |   |
| 9.04659304078304    | 100   | 140 | 0     | Open | ; |
| 27448               | 21775 |     | 19396 |      |   |
| 9.05412049791603    | 300   | 140 | 0     | Open | ; |
| 27449               | 24402 |     | 24404 |      |   |
| 9.08315430679688    | 110   | 150 | 0     | Open | ; |
| 27450               | 20757 |     | 25032 |      |   |
| 9.99936076805932    | 125   | 150 | 0     | Open | ; |
| 27451               | 21081 |     | 21970 |      |   |
| 9.12231739178773    | 125   | 150 | 0     | Open | ; |
| 27452               | 18782 |     | 18783 |      |   |
| 9.13473850812572    | 160   | 150 | 0     | Open | ; |
| 27453               | 18512 |     | 24906 |      |   |
| 9.15776459514812    | 110   | 150 | 0     | Open | ; |
| 27454               | 21210 |     | 24236 |      |   |
| 9.18733806078115    | 75    | 140 | 0     | Open | ; |
| 27455               | 22846 |     | 18856 |      |   |
| 9.23109348304743    | 140   | 150 | 0     | Open | ; |
| 27456               | 24768 |     | 24774 |      |   |
| 9.25387119708543    | 160   | 150 | 0     | Open | ; |
| 27457               | 21678 |     | 19223 |      |   |
| 9.25903332226687    | 110   | 150 | 0     | Open | ; |
| 27458               | 21410 |     | 19360 |      |   |

|                     |       |     |       |      |   |
|---------------------|-------|-----|-------|------|---|
| 9.26933363336173    | 150   | 140 | 0     | Open | ; |
| 27459               | 22831 |     | 20270 |      |   |
| 9.26970326160789    | 300   | 140 | 0     | Open | ; |
| 27460               | 23747 |     | 23748 |      |   |
| 9.27240963465029    | 100   | 140 | 0     | Open | ; |
| 27461               | 22053 |     | 18503 |      |   |
| 9.29241242007638    | 110   | 150 | 0     | Open | ; |
| 27462               | 23410 |     | 23409 |      |   |
| 9.29943199690718    | 100   | 140 | 0     | Open | ; |
| 27463               | 24577 |     | 24652 |      |   |
| 9.30008614175803    | 110   | 150 | 0     | Open | ; |
| 27464               | 20276 |     | 20909 |      |   |
| 9.31393990491732    | 75    | 150 | 0     | Open | ; |
| 27465               | 21509 |     | 21510 |      |   |
| 9.32206089405734    | 110   | 150 | 0     | Open | ; |
| 27466               | 24400 |     | 24416 |      |   |
| 9.42194053510534    | 110   | 150 | 0     | Open | ; |
| 27467               | 18705 |     | 21365 |      |   |
| 9.43634036313311    | 110   | 150 | 0     | Open | ; |
| 27468               | 19313 |     | 21384 |      |   |
| 9.44721102032062    | 160   | 150 | 0     | Open | ; |
| 27469               | 23665 |     | 23843 |      |   |
| 9.45885196483527    | 110   | 150 | 0     | Open | ; |
| 27470               | 24769 |     | 24511 |      |   |
| 9.47056186776305    | 110   | 150 | 0     | Open | ; |
| 27471               | 23795 |     | 23467 |      |   |
| 9.49165069603053    | 75    | 140 | 0     | Open | ; |
| 27472               | 19443 |     | 19444 |      |   |
| 9.49297914953034    | 100   | 140 | 0     | Open | ; |
| 27473               | 22031 |     | 23588 |      |   |
| 9.49675131023373    | 100   | 140 | 0     | Open | ; |
| 27474               | 22935 |     | 22930 |      |   |
| 9.49801921328602    | 110   | 150 | 0     | Open | ; |
| 27475               | 23324 |     | 23270 |      |   |
| 9.49936626371528    | 110   | 150 | 0     | Open | ; |
| 27476               | 19407 |     | 19408 |      |   |
| 9.50723215435331    | 100   | 140 | 0     | Open | ; |
| 27477               | 21301 |     | 21302 |      |   |
| 9.51307710730062    | 250   | 100 | 0     | Open | ; |
| 27478               | 22318 |     | 19430 |      |   |
| 9.51480174455605    | 140   | 150 | 0     | Open | ; |
| 27479               | 22529 |     | 22528 |      |   |
| 9.5394640206191 110 |       | 150 | 0     | Open | ; |
| 27480               | 23550 |     | 23551 |      |   |
| 9.53952483097623    | 75    | 150 | 0     | Open | ; |
| 27481               | 23393 |     | 23394 |      |   |
| 9.56421504354041    | 100   | 140 | 0     | Open | ; |
| 27482               | 22355 |     | 20295 |      |   |
| 9.56650640982193    | 110   | 150 | 0     | Open | ; |
| 27483               | 22994 |     | 22214 |      |   |



|                     |       |     |       |      |   |
|---------------------|-------|-----|-------|------|---|
| 9.59650725009884    | 150   | 140 | 0     | Open | ; |
| 27484               | 23308 |     | 23675 |      |   |
| 9.620122866369 200  |       | 150 | 0     | Open | ; |
| 27485               | 22664 |     | 23929 |      |   |
| 9.65258304195682    | 100   | 140 | 0     | Open | ; |
| 27486               | 22153 |     | 20088 |      |   |
| 10.0054727165446    | 160   | 150 | 0     | Open | ; |
| 27487               | 24579 |     | 24580 |      |   |
| 9.69866201907375    | 110   | 150 | 0     | Open | ; |
| 27488               | 20133 |     | 20134 |      |   |
| 9.72799146494541    | 150   | 140 | 0     | Open | ; |
| 27489               | 22434 |     | 22435 |      |   |
| 9.7417774559679 110 |       | 150 | 0     | Open | ; |
| 27490               | 24620 |     | 24621 |      |   |
| 9.74543792703658    | 160   | 150 | 0     | Open | ; |
| 27491               | 24175 |     | 22113 |      |   |
| 9.74556804057289    | 125   | 150 | 0     | Open | ; |
| 27492               | 23696 |     | 23522 |      |   |
| 9.99325556558527    | 160   | 150 | 0     | Open | ; |
| 27493               | 19564 |     | 21998 |      |   |
| 9.7591370521412 160 |       | 150 | 0     | Open | ; |
| 27494               | 19485 |     | 18969 |      |   |
| 9.76699202253443    | 100   | 140 | 0     | Open | ; |
| 27495               | 22766 |     | 23655 |      |   |
| 9.77038116501398    | 200   | 150 | 0     | Open | ; |
| 27496               | 19800 |     | 19801 |      |   |
| 9.77832457884328    | 110   | 150 | 0     | Open | ; |
| 27497               | 24588 |     | 25678 |      |   |
| 20.58742408436 110  |       | 150 | 0     | Open | ; |
| 27498               | 20126 |     | 18683 |      |   |
| 9.794387378761 100  |       | 140 | 0     | Open | ; |
| 27499               | 18514 |     | 24905 |      |   |
| 9.80769276152867    | 110   | 150 | 0     | Open | ; |
| 27500               | 22058 |     | 20459 |      |   |
| 9.81485165484596    | 100   | 140 | 0     | Open | ; |
| 27501               | 19957 |     | 19958 |      |   |
| 9.82339534925713    | 110   | 150 | 0     | Open | ; |
| 27502               | 24842 |     | 24843 |      |   |
| 9.83430437799046    | 110   | 150 | 0     | Open | ; |
| 27503               | 22929 |     | 21216 |      |   |
| 9.8354593190898 110 |       | 150 | 0     | Open | ; |
| 27504               | 18916 |     | 18917 |      |   |
| 9.84354652495359    | 150   | 140 | 0     | Open | ; |
| 27505               | 21366 |     | 21481 |      |   |
| 9.84778514464893    | 110   | 150 | 0     | Open | ; |
| 27506               | 22391 |     | 22390 |      |   |
| 9.84981122357966    | 110   | 150 | 0     | Open | ; |
| 27507               | 21979 |     | 21980 |      |   |
| 9.8598739473355 110 |       | 150 | 0     | Open | ; |
| 27508               | 18633 |     | 18634 |      |   |

|                     |       |     |       |      |   |
|---------------------|-------|-----|-------|------|---|
| 9.86332889902712    | 160   | 150 | 0     | Open | ; |
| 27509               | 23002 |     | 20369 |      |   |
| 17.8416749272746    | 100   | 140 | 0     | Open | ; |
| 27510               | 21632 |     | 21873 |      |   |
| 9.89260093441291    | 75    | 150 | 0     | Open | ; |
| 27511               | 20618 |     | 22602 |      |   |
| 9.89875638589802    | 110   | 150 | 0     | Open | ; |
| 27512               | 20648 |     | 19292 |      |   |
| 13.8920829011697    | 75    | 140 | 0     | Open | ; |
| 27513               | 23862 |     | 24918 |      |   |
| 9.91037147696986    | 125   | 140 | 0     | Open | ; |
| 27514               | 19477 |     | 23444 |      |   |
| 9.9169139168387 100 |       | 140 | 0     | Open | ; |
| 27515               | 23957 |     | 23894 |      |   |
| 9.9324952301539 100 |       | 140 | 0     | Open | ; |
| 27516               | 21261 |     | 19379 |      |   |
| 9.96774273792729    | 250   | 140 | 0     | Open | ; |
| 27517               | 23518 |     | 21003 |      |   |
| 9.97639899431359    | 200   | 150 | 0     | Open | ; |
| 27518               | 23018 |     | 24314 |      |   |
| 9.98306123671541    | 100   | 140 | 0     | Open | ; |
| 27519               | 22375 |     | 20962 |      |   |
| 9.98385479154688    | 140   | 150 | 0     | Open | ; |
| 27520               | 22671 |     | 22249 |      |   |
| 9.98407529853949    | 200   | 150 | 0     | Open | ; |
| 27521               | 23902 |     | 23903 |      |   |
| 9.99645016678198    | 100   | 140 | 0     | Open | ; |
| 27522               | 19484 |     | 19482 |      |   |
| 9.99890438669846    | 75    | 140 | 0     | Open | ; |
| 27523               | 20894 |     | 20895 |      |   |
| 9.99918052782233    | 100   | 140 | 0     | Open | ; |
| 27524               | 22932 |     | 22933 |      |   |
| 9.99920343122072    | 110   | 150 | 0     | Open | ; |
| 27525               | 21017 |     | 23758 |      |   |
| 9.99925773350925    | 110   | 150 | 0     | Open | ; |
| 27526               | 19451 |     | 18685 |      |   |
| 9.99936456633228    | 100   | 140 | 0     | Open | ; |
| 27527               | 19371 |     | 19372 |      |   |
| 9.99937287655881    | 100   | 140 | 0     | Open | ; |
| 27528               | 23559 |     | 23560 |      |   |
| 9.9993855412212 150 |       | 140 | 0     | Open | ; |
| 27529               | 19089 |     | 22711 |      |   |
| 9.99938613433763    | 125   | 150 | 0     | Open | ; |
| 27530               | 19912 |     | 22999 |      |   |
| 9.99938649050064    | 150   | 140 | 0     | Open | ; |
| 27531               | 21861 |     | 22385 |      |   |
| 9.99939919600514    | 160   | 150 | 0     | Open | ; |
| 27532               | 23878 |     | 19137 |      |   |
| 9.99940089084219    | 75    | 140 | 0     | Open | ; |
| 27533               | 19528 |     | 19529 |      |   |

|                     |       |     |       |      |   |
|---------------------|-------|-----|-------|------|---|
| 9.99940327297729    | 110   | 150 | 0     | Open | ; |
| 27534               | 22236 |     | 22237 |      |   |
| 9.99941272118926    | 100   | 140 | 0     | Open | ; |
| 27535               | 19173 |     | 23019 |      |   |
| 9.99941277894362    | 100   | 140 | 0     | Open | ; |
| 27536               | 22140 |     | 22141 |      |   |
| 9.99942001610524    | 160   | 150 | 0     | Open | ; |
| 27537               | 18540 |     | 18541 |      |   |
| 9.99942103957581    | 110   | 150 | 0     | Open | ; |
| 27538               | 24644 |     | 24645 |      |   |
| 9.99942467985173    | 50    | 140 | 0     | Open | ; |
| 27539               | 22918 |     | 22919 |      |   |
| 10.0007570664241    | 200   | 140 | 0     | Open | ; |
| 27540               | 20594 |     | 23058 |      |   |
| 9.99943521836035    | 110   | 150 | 0     | Open | ; |
| 27541               | 18799 |     | 21538 |      |   |
| 9.99943688433252    | 100   | 140 | 0     | Open | ; |
| 27542               | 20852 |     | 20853 |      |   |
| 9.99945355362318    | 110   | 150 | 0     | Open | ; |
| 27543               | 23437 |     | 19052 |      |   |
| 9.99945772824687    | 125   | 140 | 0     | Open | ; |
| 27544               | 24907 |     | 23431 |      |   |
| 9.99946536693338    | 100   | 100 | 0     | Open | ; |
| 27545               | 20995 |     | 23489 |      |   |
| 9.99947114324229    | 100   | 140 | 0     | Open | ; |
| 27546               | 23021 |     | 23712 |      |   |
| 9.99947363101834    | 100   | 140 | 0     | Open | ; |
| 27547               | 21736 |     | 23086 |      |   |
| 9.99948309892475    | 100   | 140 | 0     | Open | ; |
| 27548               | 21923 |     | 21924 |      |   |
| 9.99948754974989    | 100   | 140 | 0     | Open | ; |
| 27549               | 23523 |     | 23148 |      |   |
| 9.99949123821986    | 100   | 140 | 0     | Open | ; |
| 27550               | 20143 |     | 19479 |      |   |
| 9.99950072215358    | 110   | 150 | 0     | Open | ; |
| 27551               | 22954 |     | 23696 |      |   |
| 9.9995029191288 160 |       | 150 | 0     | Open | ; |
| 27552               | 23120 |     | 20252 |      |   |
| 9.99956379796679    | 100   | 140 | 0     | Open | ; |
| 27553               | 23052 |     | 24530 |      |   |
| 9.99965991955631    | 110   | 150 | 0     | Open | ; |
| 27554               | 20950 |     | 23210 |      |   |
| 10.0000077481257    | 110   | 150 | 0     | Open | ; |
| 27555               | 24504 |     | 24505 |      |   |
| 10.0000845311833    | 110   | 150 | 0     | Open | ; |
| 27556               | 22467 |     | 20581 |      |   |
| 10.0003640024287    | 140   | 150 | 0     | Open | ; |
| 27557               | 22357 |     | 18614 |      |   |
| 10.018805607183 125 |       | 150 | 0     | Open | ; |
| 27558               | 20864 |     | 20592 |      |   |

|                     |       |     |       |      |   |
|---------------------|-------|-----|-------|------|---|
| 10.0193442945281    | 125   | 150 | 0     | Open | ; |
| 27559               | 19287 |     | 21814 |      |   |
| 10.0283264747128    | 110   | 150 | 0     | Open | ; |
| 27560               | 21523 |     | 23752 |      |   |
| 10.0361558428946    | 160   | 150 | 0     | Open | ; |
| 27561               | 24399 |     | 24401 |      |   |
| 10.0984599006696    | 110   | 150 | 0     | Open | ; |
| 27562               | 24308 |     | 24311 |      |   |
| 11.8362468444964    | 150   | 140 | 0     | Open | ; |
| 27563               | 24485 |     | 24487 |      |   |
| 10.1453788600344    | 110   | 150 | 0     | Open | ; |
| 27564               | 23450 |     | 23451 |      |   |
| 10.164367932073 110 |       | 150 | 0     | Open | ; |
| 27565               | 21052 |     | 22549 |      |   |
| 10.165964455932 150 |       | 140 | 0     | Open | ; |
| 27566               | 22886 |     | 22883 |      |   |
| 11.9994516712512    | 110   | 150 | 0     | Open | ; |
| 27567               | 20769 |     | 19007 |      |   |
| 10.2539578449301    | 125   | 150 | 0     | Open | ; |
| 27568               | 21442 |     | 24867 |      |   |
| 10.2631659760436    | 150   | 140 | 0     | Open | ; |
| 27569               | 18610 |     | 18611 |      |   |
| 10.2654263706136    | 160   | 150 | 0     | Open | ; |
| 27570               | 24523 |     | 24518 |      |   |
| 10.2717479092037    | 110   | 150 | 0     | Open | ; |
| 27571               | 19366 |     | 19367 |      |   |
| 10.2911025942926    | 110   | 150 | 0     | Open | ; |
| 27572               | 21201 |     | 22135 |      |   |
| 10.3027297124883    | 110   | 150 | 0     | Open | ; |
| 27573               | 18968 |     | 23410 |      |   |
| 10.3625705603191    | 100   | 140 | 0     | Open | ; |
| 27574               | 24716 |     | 21635 |      |   |
| 10.3665157603247    | 100   | 140 | 0     | Open | ; |
| 27575               | 24854 |     | 20381 |      |   |
| 10.387739822312 75  |       | 140 | 0     | Open | ; |
| 27576               | 22526 |     | 23235 |      |   |
| 10.4216046327696    | 75    | 140 | 0     | Open | ; |
| 27577               | 24205 |     | 22164 |      |   |
| 10.4447341038809    | 100   | 140 | 0     | Open | ; |
| 27578               | 23036 |     | 22792 |      |   |
| 10.4457308132728    | 200   | 140 | 0     | Open | ; |
| 27579               | 22501 |     | 23090 |      |   |
| 10.4585898685541    | 100   | 140 | 0     | Open | ; |
| 27580               | 20035 |     | 20037 |      |   |
| 10.4994135569951    | 100   | 140 | 0     | Open | ; |
| 27581               | 21797 |     | 21391 |      |   |
| 10.5008732229942    | 160   | 150 | 0     | Open | ; |
| 27582               | 24749 |     | 24752 |      |   |
| 10.5655905653126    | 160   | 150 | 0     | Open | ; |
| 27583               | 21292 |     | 22049 |      |   |

|                     |       |     |       |      |   |
|---------------------|-------|-----|-------|------|---|
| 10.5260274360318    | 100   | 140 | 0     | Open | ; |
| 27584               | 24367 |     | 24904 |      |   |
| 10.581968160758 110 |       | 150 | 0     | Open | ; |
| 27585               | 19384 |     | 23472 |      |   |
| 10.6007656142392    | 250   | 140 | 0     | Open | ; |
| 27586               | 21411 |     | 21412 |      |   |
| 10.6541624427355    | 100   | 140 | 0     | Open | ; |
| 27587               | 20162 |     | 24298 |      |   |
| 10.6630636107443    | 300   | 140 | 0     | Open | ; |
| 27588               | 21323 |     | 23569 |      |   |
| 10.6793463340204    | 110   | 150 | 0     | Open | ; |
| 27589               | 22286 |     | 19575 |      |   |
| 10.6819252698295    | 100   | 140 | 0     | Open | ; |
| 27590               | 23302 |     | 22142 |      |   |
| 10.8030374564046    | 110   | 150 | 0     | Open | ; |
| 27591               | 18515 |     | 18516 |      |   |
| 10.8083644062562    | 100   | 140 | 0     | Open | ; |
| 27592               | 24397 |     | 24394 |      |   |
| 10.8145039886592    | 110   | 150 | 0     | Open | ; |
| 27593               | 24064 |     | 20913 |      |   |
| 10.8368319916764    | 500   | 130 | 0     | Open | ; |
| 27594               | 18535 |     | 22550 |      |   |
| 10.8518658509338    | 110   | 150 | 0     | Open | ; |
| 27595               | 19316 |     | 19018 |      |   |
| 10.8947628204605    | 250   | 140 | 0     | Open | ; |
| 27596               | 24177 |     | 24178 |      |   |
| 10.9106115471979    | 110   | 150 | 0     | Open | ; |
| 27597               | 18696 |     | 18697 |      |   |
| 10.9147475748388    | 200   | 150 | 0     | Open | ; |
| 27598               | 19467 |     | 21172 |      |   |
| 10.9161515325685    | 125   | 150 | 0     | Open | ; |
| 27599               | 21501 |     | 18608 |      |   |
| 10.9451552943678    | 160   | 150 | 0     | Open | ; |
| 27600               | 21284 |     | 21285 |      |   |
| 10.9646361378742    | 500   | 140 | 0     | Open | ; |
| 27601               | 19294 |     | 19295 |      |   |
| 10.9732977724711    | 100   | 140 | 0     | Open | ; |
| 27602               | 20606 |     | 20497 |      |   |
| 10.9858715854547    | 75    | 140 | 0     | Open | ; |
| 27603               | 19441 |     | 23869 |      |   |
| 10.9874476951676    | 140   | 150 | 0     | Open | ; |
| 27604               | 21193 |     | 21194 |      |   |
| 10.9992865967796    | 75    | 140 | 0     | Open | ; |
| 27605               | 21611 |     | 21612 |      |   |
| 10.999330529051 75  |       | 150 | 0     | Open | ; |
| 27606               | 22887 |     | 23216 |      |   |
| 10.9993407364746    | 110   | 150 | 0     | Open | ; |
| 27607               | 21566 |     | 21296 |      |   |
| 10.9994188509775    | 160   | 150 | 0     | Open | ; |
| 27608               | 23150 |     | 23567 |      |   |

|                     |       |     |       |      |   |
|---------------------|-------|-----|-------|------|---|
| 10.9994188504732    | 160   | 150 | 0     | Open | ; |
| 27609               | 19404 |     | 23515 |      |   |
| 10.9996268656983    | 100   | 140 | 0     | Open | ; |
| 27610               | 20430 |     | 23619 |      |   |
| 11.0010020825523    | 125   | 140 | 0     | Open | ; |
| 27611               | 21772 |     | 19495 |      |   |
| 11.0057166699559    | 100   | 140 | 0     | Open | ; |
| 27612               | 21125 |     | 23389 |      |   |
| 14.3932790742008    | 400   | 130 | 0     | Open | ; |
| 27613               | 18612 |     | 18613 |      |   |
| 11.0861658837709    | 140   | 150 | 0     | Open | ; |
| 27614               | 22049 |     | 24407 |      |   |
| 11.0906164712448    | 110   | 150 | 0     | Open | ; |
| 27615               | 19745 |     | 19746 |      |   |
| 11.1502366604052    | 100   | 140 | 0     | Open | ; |
| 27616               | 19118 |     | 23127 |      |   |
| 11.1553650641618    | 125   | 150 | 0     | Open | ; |
| 27617               | 23238 |     | 20259 |      |   |
| 11.1640177358777    | 75    | 140 | 0     | Open | ; |
| 27618               | 22126 |     | 22768 |      |   |
| 11.1803844131838    | 150   | 140 | 0     | Open | ; |
| 27619               | 18540 |     | 18542 |      |   |
| 11.2101959600958    | 110   | 150 | 0     | Open | ; |
| 27620               | 19693 |     | 19694 |      |   |
| 11.212029201063 100 |       | 140 | 0     | Open | ; |
| 27621               | 22971 |     | 21360 |      |   |
| 11.221331365664 75  |       | 140 | 0     | Open | ; |
| 27622               | 20626 |     | 20627 |      |   |
| 11.2264215514608    | 200   | 150 | 0     | Open | ; |
| 27623               | 24438 |     | 24439 |      |   |
| 11.229598159847 160 |       | 150 | 0     | Open | ; |
| 27624               | 23470 |     | 23366 |      |   |
| 11.2588193300529    | 160   | 150 | 0     | Open | ; |
| 27625               | 19144 |     | 24046 |      |   |
| 11.2656656249748    | 110   | 150 | 0     | Open | ; |
| 27626               | 20408 |     | 21955 |      |   |
| 11.292230647543 140 |       | 150 | 0     | Open | ; |
| 27627               | 21675 |     | 22940 |      |   |
| 11.2956519220444    | 75    | 150 | 0     | Open | ; |
| 27628               | 19290 |     | 23764 |      |   |
| 11.3136871129383    | 110   | 150 | 0     | Open | ; |
| 27629               | 19096 |     | 19097 |      |   |
| 11.3157856394528    | 110   | 150 | 0     | Open | ; |
| 27630               | 23557 |     | 23558 |      |   |
| 11.3306195774555    | 100   | 140 | 0     | Open | ; |
| 27631               | 24670 |     | 24550 |      |   |
| 11.3421499937129    | 200   | 150 | 0     | Open | ; |
| 27632               | 18554 |     | 22860 |      |   |
| 13.1927093675233    | 110   | 150 | 0     | Open | ; |
| 27633               | 24995 |     | 21713 |      |   |

|                  |       |     |       |      |   |
|------------------|-------|-----|-------|------|---|
| 15.4996203799887 | 160   | 150 | 0     | Open | ; |
| 27634            | 23132 |     | 21988 |      |   |
| 11.4283115138503 | 110   | 150 | 0     | Open | ; |
| 27635            | 23573 |     | 22669 |      |   |
| 11.4314192617234 | 100   | 140 | 0     | Open | ; |
| 27636            | 21706 |     | 22852 |      |   |
| 11.4314722120289 | 75    | 140 | 0     | Open | ; |
| 27637            | 22600 |     | 19532 |      |   |
| 11.4492705841071 | 110   | 150 | 0     | Open | ; |
| 27638            | 21535 |     | 20087 |      |   |
| 11.485289746297  | 150   | 100 | 0     | Open | ; |
| 27639            | 22983 |     | 22984 |      |   |
| 11.4894852645865 | 100   | 140 | 0     | Open | ; |
| 27640            | 22308 |     | 20783 |      |   |
| 11.4976976910946 | 110   | 150 | 0     | Open | ; |
| 27641            | 20257 |     | 23463 |      |   |
| 11.5112286253218 | 125   | 150 | 0     | Open | ; |
| 27643            | 22870 |     | 20483 |      |   |
| 11.5314069928739 | 160   | 150 | 0     | Open | ; |
| 27644            | 24253 |     | 25046 |      |   |
| 13.2205493908829 | 250   | 140 | 0     | Open | ; |
| 27645            | 20426 |     | 22889 |      |   |
| 11.5887432123621 | 110   | 150 | 0     | Open | ; |
| 27646            | 23474 |     | 21500 |      |   |
| 11.7039582065752 | 160   | 150 | 0     | Open | ; |
| 27647            | 22103 |     | 22104 |      |   |
| 11.7091629187531 | 160   | 150 | 0     | Open | ; |
| 27648            | 18580 |     | 21984 |      |   |
| 11.7542882127456 | 110   | 150 | 0     | Open | ; |
| 27649            | 22403 |     | 19050 |      |   |
| 11.7567642013809 | 125   | 140 | 0     | Open | ; |
| 27650            | 23900 |     | 19745 |      |   |
| 11.7684222530683 | 100   | 140 | 0     | Open | ; |
| 27651            | 22320 |     | 18612 |      |   |
| 11.7950546218436 | 140   | 150 | 0     | Open | ; |
| 27652            | 21617 |     | 21618 |      |   |
| 11.8081646617004 | 110   | 150 | 0     | Open | ; |
| 27653            | 20771 |     | 22369 |      |   |
| 11.8334781067865 | 110   | 150 | 0     | Open | ; |
| 27654            | 21488 |     | 24163 |      |   |
| 11.8370196375499 | 150   | 140 | 0     | Open | ; |
| 27655            | 21714 |     | 23331 |      |   |
| 11.8420631956764 | 160   | 150 | 0     | Open | ; |
| 27656            | 23428 |     | 22503 |      |   |
| 11.8557082197952 | 100   | 100 | 0     | Open | ; |
| 27657            | 21431 |     | 21432 |      |   |
| 11.8723760741273 | 100   | 140 | 0     | Open | ; |
| 27658            | 19759 |     | 19760 |      |   |
| 11.8776344685235 | 200   | 150 | 0     | Open | ; |
| 27659            | 22621 |     | 22622 |      |   |

|                  |       |     |       |      |   |
|------------------|-------|-----|-------|------|---|
| 11.8904817620519 | 160   | 150 | 0     | Open | ; |
| 27660            | 19347 |     | 19351 |      |   |
| 11.8923543360139 | 110   | 150 | 0     | Open | ; |
| 27661            | 18762 |     | 18763 |      |   |
| 11.8960909617635 | 250   | 100 | 0     | Open | ; |
| 27662            | 21601 |     | 21602 |      |   |
| 11.0405571416528 | 140   | 150 | 0     | Open | ; |
| 27663            | 22849 |     | 24206 |      |   |
| 11.968105310941  | 150   | 140 | 0     | Open | ; |
| 27664            | 21554 |     | 21551 |      |   |
| 11.9732907258793 | 110   | 150 | 0     | Open | ; |
| 27665            | 23118 |     | 25049 |      |   |
| 13.8009299043034 | 200   | 140 | 0     | Open | ; |
| 27666            | 22854 |     | 23544 |      |   |
| 11.9997134022681 | 100   | 140 | 0     | Open | ; |
| 27667            | 18739 |     | 18877 |      |   |
| 11.9984030021985 | 140   | 150 | 0     | Open | ; |
| 27668            | 23874 |     | 23875 |      |   |
| 11.9992565614316 | 75    | 140 | 0     | Open | ; |
| 27669            | 18716 |     | 18717 |      |   |
| 11.9992666607902 | 75    | 140 | 0     | Open | ; |
| 27670            | 22411 |     | 22413 |      |   |
| 11.9993008820584 | 75    | 150 | 0     | Open | ; |
| 27671            | 19252 |     | 19253 |      |   |
| 11.9993086516815 | 160   | 150 | 0     | Open | ; |
| 27672            | 22023 |     | 19022 |      |   |
| 11.99932411818   | 125   | 150 | 0     | Open | ; |
| 27673            | 19137 |     | 22906 |      |   |
| 11.9993356624915 | 75    | 140 | 0     | Open | ; |
| 27674            | 20147 |     | 20148 |      |   |
| 11.9993895714711 | 160   | 150 | 0     | Open | ; |
| 27675            | 22372 |     | 22374 |      |   |
| 11.9993911920729 | 140   | 150 | 0     | Open | ; |
| 27676            | 20506 |     | 22910 |      |   |
| 11.9993945996349 | 350   | 130 | 0     | Open | ; |
| 27677            | 20182 |     | 24032 |      |   |
| 11.9994104872634 | 110   | 150 | 0     | Open | ; |
| 27678            | 24128 |     | 20223 |      |   |
| 11.99942166586   | 150   | 140 | 0     | Open | ; |
| 27679            | 19763 |     | 19761 |      |   |
| 11.9994768463607 | 200   | 150 | 0     | Open | ; |
| 27680            | 21267 |     | 23734 |      |   |
| 11.9995772362928 | 110   | 150 | 0     | Open | ; |
| 27681            | 20102 |     | 20104 |      |   |
| 11.9995904782536 | 100   | 140 | 0     | Open | ; |
| 27682            | 20474 |     | 20660 |      |   |
| 11.9997675119638 | 160   | 150 | 0     | Open | ; |
| 27683            | 24480 |     | 24481 |      |   |
| 12.0000497963569 | 110   | 150 | 0     | Open | ; |
| 27684            | 21130 |     | 21131 |      |   |



|                     |       |     |       |      |   |
|---------------------|-------|-----|-------|------|---|
| 12.009358018678 100 |       | 140 | 0     | Open | ; |
| 27685               | 21118 |     | 21119 |      |   |
| 12.0102023468347    | 100   | 140 | 0     | Open | ; |
| 27686               | 18914 |     | 18915 |      |   |
| 12.0312870743227    | 250   | 140 | 0     | Open | ; |
| 27687               | 21703 |     | 21704 |      |   |
| 12.0384052960795    | 140   | 150 | 0     | Open | ; |
| 27688               | 18775 |     | 18776 |      |   |
| 12.0406570546753    | 160   | 150 | 0     | Open | ; |
| 27689               | 22130 |     | 22131 |      |   |
| 12.076399816341 100 |       | 140 | 0     | Open | ; |
| 27690               | 22876 |     | 22875 |      |   |
| 17.3702547843942    | 100   | 140 | 0     | Open | ; |
| 27691               | 21524 |     | 24976 |      |   |
| 12.0979118556904    | 160   | 150 | 0     | Open | ; |
| 27692               | 22711 |     | 24863 |      |   |
| 12.1184209239115    | 125   | 150 | 0     | Open | ; |
| 27693               | 21099 |     | 20840 |      |   |
| 12.1195683852399    | 110   | 150 | 0     | Open | ; |
| 27694               | 22314 |     | 20784 |      |   |
| 12.1226837927306    | 110   | 150 | 0     | Open | ; |
| 27695               | 24474 |     | 24475 |      |   |
| 12.1450203053991    | 110   | 150 | 0     | Open | ; |
| 27696               | 23362 |     | 22673 |      |   |
| 12.1684072070012    | 125   | 140 | 0     | Open | ; |
| 27697               | 23030 |     | 22807 |      |   |
| 12.1856141809851    | 200   | 150 | 0     | Open | ; |
| 27698               | 24709 |     | 23189 |      |   |
| 12.2492150744154    | 110   | 150 | 0     | Open | ; |
| 27699               | 21689 |     | 21690 |      |   |
| 12.3053117441455    | 100   | 140 | 0     | Open | ; |
| 27700               | 23577 |     | 22018 |      |   |
| 12.3170958622528    | 100   | 140 | 0     | Open | ; |
| 27701               | 23453 |     | 18723 |      |   |
| 12.331604310249 140 |       | 150 | 0     | Open | ; |
| 27702               | 24421 |     | 24606 |      |   |
| 12.3470341340008    | 200   | 150 | 0     | Open | ; |
| 27703               | 19710 |     | 19036 |      |   |
| 12.35245372363 110  |       | 150 | 0     | Open | ; |
| 27704               | 24638 |     | 24639 |      |   |
| 12.3691981137061    | 110   | 150 | 0     | Open | ; |
| 27705               | 19325 |     | 19326 |      |   |
| 12.3766945662067    | 300   | 140 | 0     | Open | ; |
| 27706               | 23020 |     | 23651 |      |   |
| 12.3848518141554    | 100   | 140 | 0     | Open | ; |
| 27707               | 23478 |     | 20421 |      |   |
| 12.4507485149699    | 160   | 150 | 0     | Open | ; |
| 27708               | 22278 |     | 22282 |      |   |
| 12.4520963549307    | 110   | 150 | 0     | Open | ; |
| 27709               | 21602 |     | 22233 |      |   |

|                  |       |     |       |      |   |
|------------------|-------|-----|-------|------|---|
| 12.4607986296002 | 140   | 150 | 0     | Open | ; |
| 27710            | 20188 |     | 20059 |      |   |
| 12.4789076784057 | 100   | 140 | 0     | Open | ; |
| 27711            | 23197 |     | 23353 |      |   |
| 12.4848307290242 | 110   | 150 | 0     | Open | ; |
| 27712            | 21613 |     | 21614 |      |   |
| 12.4993004531319 | 150   | 140 | 0     | Open | ; |
| 27713            | 24068 |     | 24140 |      |   |
| 17.0799618847442 | 150   | 140 | 0     | Open | ; |
| 27714            | 20203 |     | 20825 |      |   |
| 12.534877327823  | 150   | 140 | 0     | Open | ; |
| 27715            | 24234 |     | 23415 |      |   |
| 12.5367765622032 | 75    | 150 | 0     | Open | ; |
| 27716            | 24855 |     | 20383 |      |   |
| 12.6010662801233 | 200   | 140 | 0     | Open | ; |
| 27717            | 24851 |     | PS1   |      |   |
| 12.6214076730791 | 500   | 130 | 0     | Open | ; |
| 27718            | 19608 |     | 21849 |      |   |
| 12.6724309065778 | 110   | 150 | 0     | Open | ; |
| 27719            | 23341 |     | 23342 |      |   |
| 12.6729422890489 | 100   | 140 | 0     | Open | ; |
| 27720            | 19580 |     | 20930 |      |   |
| 12.6741260148054 | 160   | 150 | 0     | Open | ; |
| 27721            | 20457 |     | 20455 |      |   |
| 12.7293947106039 | 200   | 140 | 0     | Open | ; |
| 27722            | 22873 |     | 22874 |      |   |
| 12.7296085666126 | 200   | 150 | 0     | Open | ; |
| 27723            | 22303 |     | 19020 |      |   |
| 12.737947036954  | 250   | 140 | 0     | Open | ; |
| 27724            | 21783 |     | 23459 |      |   |
| 12.7390238035093 | 75    | 150 | 0     | Open | ; |
| 27725            | 21907 |     | 21908 |      |   |
| 12.7998084263045 | 110   | 150 | 0     | Open | ; |
| 27726            | 22246 |     | 24235 |      |   |
| 12.8004947257248 | 100   | 140 | 0     | Open | ; |
| 27727            | 22333 |     | 20518 |      |   |
| 12.8173146954798 | 110   | 150 | 0     | Open | ; |
| 27728            | 21300 |     | 21089 |      |   |
| 12.8190073284617 | 200   | 150 | 0     | Open | ; |
| 27729            | 24417 |     | 23159 |      |   |
| 12.8588971323597 | 110   | 150 | 0     | Open | ; |
| 27730            | 24857 |     | 24858 |      |   |
| 12.8676217231137 | 160   | 150 | 0     | Open | ; |
| 27731            | 20546 |     | 19609 |      |   |
| 12.9305353156566 | 160   | 150 | 0     | Open | ; |
| 27732            | 22376 |     | 22377 |      |   |
| 12.9688949605435 | 200   | 150 | 0     | Open | ; |
| 27733            | 20117 |     | 20118 |      |   |
| 12.9984554968378 | 200   | 150 | 0     | Open | ; |
| 27734            | 19079 |     | 20156 |      |   |

|                    |       |     |       |      |   |
|--------------------|-------|-----|-------|------|---|
| 12.999038390594 75 |       | 140 | 0     | Open | ; |
| 27735              | 20517 |     | 23746 |      |   |
| 12.9990590954839   | 150   | 140 | 0     | Open | ; |
| 27736              | 19988 |     | 24065 |      |   |
| 12.9990784755756   | 75    | 150 | 0     | Open | ; |
| 27737              | 19500 |     | 19501 |      |   |
| 12.9991141349773   | 100   | 140 | 0     | Open | ; |
| 27738              | 23744 |     | 23745 |      |   |
| 12.9991345457892   | 200   | 150 | 0     | Open | ; |
| 27740              | 20461 |     | 23772 |      |   |
| 12.9992607209169   | 100   | 140 | 0     | Open | ; |
| 27741              | 19229 |     | 19230 |      |   |
| 12.9992709936307   | 75    | 150 | 0     | Open | ; |
| 27742              | 23404 |     | 23405 |      |   |
| 13.0000763831948   | 110   | 150 | 0     | Open | ; |
| 27743              | 23006 |     | 23043 |      |   |
| 13.029946888991 75 |       | 150 | 0     | Open | ; |
| 27744              | 22653 |     | 19646 |      |   |
| 13.0617195746699   | 100   | 140 | 0     | Open | ; |
| 27745              | 23974 |     | 23975 |      |   |
| 13.064545641225 75 |       | 150 | 0     | Open | ; |
| 27746              | 22804 |     | 20245 |      |   |
| 13.1004060583459   | 125   | 150 | 0     | Open | ; |
| 27747              | 24624 |     | 24625 |      |   |
| 13.1056089195697   | 110   | 150 | 0     | Open | ; |
| 27748              | 20346 |     | 20446 |      |   |
| 13.1056977562581   | 110   | 150 | 0     | Open | ; |
| 27749              | 20939 |     | 25140 |      |   |
| 14.9080602883925   | 160   | 150 | 0     | Open | ; |
| 27750              | 22022 |     | 24111 |      |   |
| 13.1254155113956   | 125   | 150 | 0     | Open | ; |
| 27751              | 24327 |     | 23615 |      |   |
| 18.9959125733546   | 200   | 150 | 0     | Open | ; |
| 27752              | 24671 |     | 23535 |      |   |
| 13.1955551672614   | 160   | 150 | 0     | Open | ; |
| 27753              | 24833 |     | 21252 |      |   |
| 13.2080531713978   | 140   | 150 | 0     | Open | ; |
| 27754              | 21069 |     | 21070 |      |   |
| 13.2193445167939   | 160   | 150 | 0     | Open | ; |
| 27755              | 21204 |     | 21205 |      |   |
| 13.2465600880845   | 160   | 150 | 0     | Open | ; |
| 27756              | 19741 |     | 19742 |      |   |
| 13.2683435617125   | 160   | 150 | 0     | Open | ; |
| 27757              | 22862 |     | 22194 |      |   |
| 13.2750483406492   | 100   | 140 | 0     | Open | ; |
| 27758              | 23087 |     | 23318 |      |   |
| 15.0932561158137   | 100   | 140 | 0     | Open | ; |
| 27759              | 21323 |     | 21324 |      |   |
| 13.3301972439563   | 110   | 150 | 0     | Open | ; |
| 27760              | 20851 |     | 22365 |      |   |

|                     |       |     |       |      |   |
|---------------------|-------|-----|-------|------|---|
| 13.3388518319554    | 110   | 150 | 0     | Open | ; |
| 27761               | 24180 |     | 24717 |      |   |
| 13.3467807101631    | 150   | 140 | 0     | Open | ; |
| 27762               | 24332 |     | 24373 |      |   |
| 13.3761898547936    | 140   | 150 | 0     | Open | ; |
| 27763               | 23824 |     | 22061 |      |   |
| 13.3875562387087    | 250   | 100 | 0     | Open | ; |
| 27765               | 21693 |     | 21694 |      |   |
| 13.4951376473417    | 140   | 150 | 0     | Open | ; |
| 27766               | 22173 |     | 20498 |      |   |
| 13.6110601402809    | 200   | 140 | 0     | Open | ; |
| 27767               | 18789 |     | 19397 |      |   |
| 13.6272187258692    | 110   | 150 | 0     | Open | ; |
| 27768               | 19972 |     | 19973 |      |   |
| 13.6489609509634    | 150   | 140 | 0     | Open | ; |
| 27769               | 19831 |     | 20240 |      |   |
| 13.6604169632592    | 200   | 150 | 0     | Open | ; |
| 27771               | 21027 |     | 23575 |      |   |
| 13.7204217246544    | 125   | 140 | 0     | Open | ; |
| 27772               | 21435 |     | 21436 |      |   |
| 13.7444780111994    | 125   | 140 | 0     | Open | ; |
| 27773               | 22967 |     | 22968 |      |   |
| 13.761366279002 110 |       | 150 | 0     | Open | ; |
| 27774               | 23484 |     | 24990 |      |   |
| 15.6295684915554    | 100   | 140 | 0     | Open | ; |
| 27775               | 19415 |     | 21152 |      |   |
| 13.849836938571 160 |       | 150 | 0     | Open | ; |
| 27776               | 22544 |     | 24339 |      |   |
| 19.4964934325586    | 125   | 140 | 0     | Open | ; |
| 27777               | 22025 |     | 21648 |      |   |
| 13.9045600379354    | 125   | 150 | 0     | Open | ; |
| 27778               | 24823 |     | 24824 |      |   |
| 13.9375347085019    | 200   | 150 | 0     | Open | ; |
| 27779               | 22875 |     | 20303 |      |   |
| 13.9438308784035    | 100   | 140 | 0     | Open | ; |
| 27780               | 23823 |     | 24206 |      |   |
| 13.9446429141109    | 100   | 140 | 0     | Open | ; |
| 27781               | 23536 |     | 20747 |      |   |
| 13.9510010678269    | 110   | 150 | 0     | Open | ; |
| 27782               | 20841 |     | 22187 |      |   |
| 13.9967993181409    | 150   | 140 | 0     | Open | ; |
| 27783               | 23220 |     | 19716 |      |   |
| 13.9974844511317    | 200   | 150 | 0     | Open | ; |
| 27784               | 19472 |     | 19473 |      |   |
| 13.9990539217013    | 75    | 140 | 0     | Open | ; |
| 27785               | 20271 |     | 25135 |      |   |
| 13.9990934952305    | 100   | 140 | 0     | Open | ; |
| 27786               | 19757 |     | 20780 |      |   |
| 13.9991400466899    | 75    | 150 | 0     | Open | ; |
| 27787               | 20530 |     | 22491 |      |   |

|                  |       |     |       |      |   |
|------------------|-------|-----|-------|------|---|
| 13.9992006120154 | 110   | 150 | 0     | Open | ; |
| 27788            | 21240 |     | 21556 |      |   |
| 13.9992136980532 | 160   | 150 | 0     | Open | ; |
| 27789            | 21667 |     | 21666 |      |   |
| 13.9992372152955 | 250   | 140 | 0     | Open | ; |
| 27790            | 20052 |     | 19900 |      |   |
| 13.9992616249059 | 140   | 150 | 0     | Open | ; |
| 27791            | 23962 |     | 20362 |      |   |
| 13.9992739416665 | 100   | 140 | 0     | Open | ; |
| 27792            | 21414 |     | 19494 |      |   |
| 13.9999570547169 | 100   | 140 | 0     | Open | ; |
| 27793            | 21108 |     | 21109 |      |   |
| 14.0028882038465 | 125   | 150 | 0     | Open | ; |
| 27794            | 21116 |     | 21117 |      |   |
| 14.0405070374037 | 110   | 150 | 0     | Open | ; |
| 27795            | 22450 |     | 23991 |      |   |
| 14.0539492965651 | 160   | 150 | 0     | Open | ; |
| 27796            | 23473 |     | 20746 |      |   |
| 14.0589571099478 | 110   | 150 | 0     | Open | ; |
| 27797            | 24211 |     | 24390 |      |   |
| 14.0740999489695 | 300   | 140 | 0     | Open | ; |
| 27798            | 20903 |     | 20904 |      |   |
| 14.0867222463398 | 75    | 140 | 0     | Open | ; |
| 27799            | 19544 |     | 21998 |      |   |
| 14.0930618898718 | 160   | 150 | 0     | Open | ; |
| 27800            | 23360 |     | 22902 |      |   |
| 15.9991532754264 | 100   | 140 | 0     | Open | ; |
| 27801            | 19413 |     | 19399 |      |   |
| 14.1234226800692 | 110   | 150 | 0     | Open | ; |
| 27802            | 24939 |     | 20716 |      |   |
| 20.5385511590154 | 200   | 140 | 0     | Open | ; |
| 27803            | 24526 |     | 24133 |      |   |
| 14.146551467372  | 110   | 150 | 0     | Open | ; |
| 27804            | 24149 |     | 23271 |      |   |
| 19.7528129976797 | 110   | 150 | 0     | Open | ; |
| 27805            | 22475 |     | 24596 |      |   |
| 14.1565926327325 | 200   | 150 | 0     | Open | ; |
| 27806            | 19552 |     | 20902 |      |   |
| 16.3276640654835 | 200   | 140 | 0     | Open | ; |
| 27807            | 24858 |     | 24934 |      |   |
| 14.2087396668736 | 160   | 150 | 0     | Open | ; |
| 27808            | 23986 |     | 19780 |      |   |
| 14.2374506593736 | 75    | 140 | 0     | Open | ; |
| 27809            | 19078 |     | 19237 |      |   |
| 14.2689549242604 | 125   | 150 | 0     | Open | ; |
| 27810            | 20021 |     | 21577 |      |   |
| 20.6946888789883 | 250   | 140 | 0     | Open | ; |
| 27811            | 20505 |     | 21625 |      |   |
| 14.3536267154488 | 160   | 150 | 0     | Open | ; |
| 27812            | 20020 |     | 20021 |      |   |

|                     |       |     |       |      |   |
|---------------------|-------|-----|-------|------|---|
| 14.3122516763675    | 250   | 140 | 0     | Open | ; |
| 27813               | 18925 |     | 22294 |      |   |
| 14.3157759150456    | 110   | 150 | 0     | Open | ; |
| 27814               | 21288 |     | 21289 |      |   |
| 14.3816951914322    | 75    | 140 | 0     | Open | ; |
| 27815               | 23629 |     | 21040 |      |   |
| 14.4270992130554    | 125   | 140 | 0     | Open | ; |
| 27816               | 23092 |     | 23528 |      |   |
| 14.4278750094691    | 100   | 140 | 0     | Open | ; |
| 27817               | 23580 |     | 20597 |      |   |
| 19.9543990699324    | 160   | 150 | 0     | Open | ; |
| 27818               | 21656 |     | 19795 |      |   |
| 14.4660024272472    | 110   | 150 | 0     | Open | ; |
| 27819               | 21282 |     | 21922 |      |   |
| 14.4733646006047    | 110   | 150 | 0     | Open | ; |
| 27820               | 23637 |     | 23494 |      |   |
| 14.4934969416635    | 125   | 150 | 0     | Open | ; |
| 27821               | 21731 |     | 21732 |      |   |
| 14.4991327448521    | 75    | 140 | 0     | Open | ; |
| 27822               | 24521 |     | 24522 |      |   |
| 14.499725928308 110 |       | 150 | 0     | Open | ; |
| 27823               | 22426 |     | 20041 |      |   |
| 14.5002460065071    | 110   | 150 | 0     | Open | ; |
| 27824               | 25679 |     | 24592 |      |   |
| 17.5712415691231    | 110   | 150 | 0     | Open | ; |
| 27825               | 21034 |     | 19879 |      |   |
| 14.5951179099945    | 200   | 150 | 0     | Open | ; |
| 27826               | 23583 |     | 23584 |      |   |
| 14.6123294928215    | 100   | 140 | 0     | Open | ; |
| 27827               | 22081 |     | 20768 |      |   |
| 14.6539027656618    | 250   | 140 | 0     | Open | ; |
| 27828               | 18635 |     | 18636 |      |   |
| 14.6588319883894    | 125   | 140 | 0     | Open | ; |
| 27829               | 20347 |     | 20348 |      |   |
| 14.6925337456071    | 100   | 140 | 0     | Open | ; |
| 27830               | 24672 |     | 24674 |      |   |
| 14.7354274475972    | 110   | 150 | 0     | Open | ; |
| 27831               | 21061 |     | 21062 |      |   |
| 14.8294646404622    | 110   | 150 | 0     | Open | ; |
| 27832               | 24243 |     | 23627 |      |   |
| 14.8522153266599    | 100   | 140 | 0     | Open | ; |
| 27833               | 19784 |     | 19785 |      |   |
| 14.9199173711448    | 110   | 150 | 0     | Open | ; |
| 27834               | 21758 |     | 21759 |      |   |
| 14.927642314125 110 |       | 150 | 0     | Open | ; |
| 27835               | 19609 |     | 20545 |      |   |
| 14.9299822504549    | 160   | 150 | 0     | Open | ; |
| 27836               | 19847 |     | 19848 |      |   |
| 14.9882939689298    | 110   | 150 | 0     | Open | ; |
| 27837               | 21313 |     | 22063 |      |   |

|                  |       |     |       |      |   |
|------------------|-------|-----|-------|------|---|
| 14.9990611393711 | 100   | 140 | 0     | Open | ; |
| 27838            | 23057 |     | 23076 |      |   |
| 14.999072481197  | 100   | 140 | 0     | Open | ; |
| 27839            | 22158 |     | 19189 |      |   |
| 14.9990902455461 | 200   | 150 | 0     | Open | ; |
| 27840            | 20529 |     | 22490 |      |   |
| 14.9990935491313 | 110   | 150 | 0     | Open | ; |
| 27841            | 20852 |     | 22781 |      |   |
| 14.9991267759396 | 110   | 150 | 0     | Open | ; |
| 27842            | 24039 |     | 24817 |      |   |
| 14.9991340922524 | 125   | 150 | 0     | Open | ; |
| 27843            | 23592 |     | 21811 |      |   |
| 14.9991452053036 | 250   | 100 | 0     | Open | ; |
| 27844            | 21162 |     | 21163 |      |   |
| 14.9991632737451 | 125   | 150 | 0     | Open | ; |
| 27845            | 20296 |     | 20297 |      |   |
| 14.9991642225246 | 200   | 140 | 0     | Open | ; |
| 27846            | 23963 |     | 20363 |      |   |
| 14.9991669374979 | 100   | 140 | 0     | Open | ; |
| 27847            | 23840 |     | 18978 |      |   |
| 14.9991707291936 | 200   | 150 | 0     | Open | ; |
| 27848            | 23670 |     | 23134 |      |   |
| 15.0010107211829 | 150   | 140 | 0     | Open | ; |
| 27849            | 19176 |     | 19177 |      |   |
| 14.9991769934085 | 75    | 140 | 0     | Open | ; |
| 27850            | 23962 |     | 23019 |      |   |
| 14.9991873877153 | 100   | 140 | 0     | Open | ; |
| 27851            | 22965 |     | 22966 |      |   |
| 14.9991875662063 | 75    | 150 | 0     | Open | ; |
| 27852            | 24959 |     | 23685 |      |   |
| 14.9998286504239 | 100   | 140 | 0     | Open | ; |
| 27853            | 23661 |     | 23313 |      |   |
| 15.0004817251035 | 140   | 150 | 0     | Open | ; |
| 27854            | 24994 |     | 20910 |      |   |
| 15.0396040242498 | 200   | 140 | 0     | Open | ; |
| 27855            | 18935 |     | 18936 |      |   |
| 15.0461691075526 | 110   | 150 | 0     | Open | ; |
| 27856            | 20843 |     | 23890 |      |   |
| 15.0461850001422 | 100   | 140 | 0     | Open | ; |
| 27857            | 23957 |     | 23958 |      |   |
| 15.0876698930129 | 100   | 140 | 0     | Open | ; |
| 27858            | 20659 |     | 20476 |      |   |
| 15.1597524655587 | 160   | 150 | 0     | Open | ; |
| 27859            | 19414 |     | 21808 |      |   |
| 15.1644787029772 | 110   | 150 | 0     | Open | ; |
| 27860            | 21378 |     | 21375 |      |   |
| 15.2090671710738 | 140   | 150 | 0     | Open | ; |
| 27861            | 19910 |     | 20001 |      |   |
| 15.2199227735589 | 150   | 140 | 0     | Open | ; |
| 27862            | 24094 |     | 21008 |      |   |

|                     |       |     |       |      |   |
|---------------------|-------|-----|-------|------|---|
| 15.238232352028 125 |       | 140 | 0     | Open | ; |
| 27863               | 21793 |     | 19155 |      |   |
| 15.2428216282924    | 100   | 140 | 0     | Open | ; |
| 27864               | 22237 |     | 20649 |      |   |
| 15.2692026408277    | 100   | 140 | 0     | Open | ; |
| 27865               | 20740 |     | 20662 |      |   |
| 15.2730442312845    | 110   | 150 | 0     | Open | ; |
| 27866               | 21539 |     | 21574 |      |   |
| 15.2823652338401    | 100   | 140 | 0     | Open | ; |
| 27867               | 22472 |     | 20916 |      |   |
| 15.2863314032995    | 250   | 100 | 0     | Open | ; |
| 27868               | 18697 |     | 20335 |      |   |
| 15.2893483948827    | 200   | 150 | 0     | Open | ; |
| 27869               | 21827 |     | 21828 |      |   |
| 15.2942232488388    | 75    | 140 | 0     | Open | ; |
| 27870               | 20010 |     | 20011 |      |   |
| 15.3559783803047    | 250   | 140 | 0     | Open | ; |
| 27871               | 21598 |     | 21599 |      |   |
| 15.4124734029962    | 160   | 150 | 0     | Open | ; |
| 27872               | 20178 |     | 21860 |      |   |
| 15.4262904351599    | 160   | 150 | 0     | Open | ; |
| 27873               | 23133 |     | 22242 |      |   |
| 15.4461736173942    | 200   | 150 | 0     | Open | ; |
| 27874               | 23091 |     | 23092 |      |   |
| 15.4732527300993    | 100   | 140 | 0     | Open | ; |
| 27875               | 24454 |     | 24457 |      |   |
| 15.48553366366 110  |       | 150 | 0     | Open | ; |
| 27876               | 22933 |     | 22935 |      |   |
| 15.5007808612084    | 110   | 150 | 0     | Open | ; |
| 27877               | 22057 |     | 20095 |      |   |
| 15.5212773197269    | 200   | 150 | 0     | Open | ; |
| 27878               | 20116 |     | 25064 |      |   |
| 15.5229034527656    | 400   | 150 | 0     | Open | ; |
| 27879               | 21237 |     | 21238 |      |   |
| 15.587224092344 110 |       | 150 | 0     | Open | ; |
| 27880               | 23126 |     | 22484 |      |   |
| 15.6269831730666    | 110   | 150 | 0     | Open | ; |
| 27881               | 24603 |     | 24598 |      |   |
| 15.5934323827086    | 250   | 140 | 0     | Open | ; |
| 27882               | 19421 |     | 19422 |      |   |
| 15.6144152430861    | 140   | 150 | 0     | Open | ; |
| 27883               | 19102 |     | 19103 |      |   |
| 15.6246002513715    | 75    | 150 | 0     | Open | ; |
| 27884               | 23263 |     | 23264 |      |   |
| 15.643919043682 300 |       | 140 | 0     | Open | ; |
| 27885               | 22767 |     | 20378 |      |   |
| 15.6543416625314    | 200   | 150 | 0     | Open | ; |
| 27886               | 23402 |     | 24300 |      |   |
| 15.6692232257646    | 100   | 140 | 0     | Open | ; |
| 27887               | 22744 |     | 22745 |      |   |



|                     |       |     |       |      |   |
|---------------------|-------|-----|-------|------|---|
| 15.6947794281812    | 110   | 150 | 0     | Open | ; |
| 27889               | 24424 |     | 24397 |      |   |
| 15.7364001939799    | 75    | 150 | 0     | Open | ; |
| 27890               | 19010 |     | 21878 |      |   |
| 15.740067840309 160 |       | 150 | 0     | Open | ; |
| 27891               | 21804 |     | 21213 |      |   |
| 15.7497210777266    | 125   | 150 | 0     | Open | ; |
| 27892               | 20865 |     | 23412 |      |   |
| 15.8508065806055    | 100   | 150 | 0     | Open | ; |
| 27893               | 19799 |     | 19821 |      |   |
| 15.8949591293629    | 110   | 150 | 0     | Open | ; |
| 27894               | 19798 |     | 19799 |      |   |
| 15.8949672969853    | 110   | 150 | 0     | Open | ; |
| 27895               | 22604 |     | 22323 |      |   |
| 15.9052041721506    | 160   | 150 | 0     | Open | ; |
| 27896               | 20535 |     | 21613 |      |   |
| 15.9840257881538    | 150   | 140 | 0     | Open | ; |
| 27897               | 23900 |     | 23901 |      |   |
| 15.995160533712 100 |       | 140 | 0     | Open | ; |
| 27898               | 23683 |     | 23684 |      |   |
| 15.9989217593842    | 75    | 150 | 0     | Open | ; |
| 27899               | 22713 |     | 20733 |      |   |
| 15.9989767956037    | 110   | 150 | 0     | Open | ; |
| 27900               | 23617 |     | 23681 |      |   |
| 15.9990345990086    | 75    | 150 | 0     | Open | ; |
| 27901               | 21492 |     | 23756 |      |   |
| 15.9990690088707    | 100   | 140 | 0     | Open | ; |
| 27902               | 23123 |     | 22904 |      |   |
| 16.0076436052504    | 75    | 140 | 0     | Open | ; |
| 27903               | 21075 |     | 20019 |      |   |
| 16.0113753997442    | 110   | 150 | 0     | Open | ; |
| 27904               | 20738 |     | 22344 |      |   |
| 16.036886854751 110 |       | 150 | 0     | Open | ; |
| 27905               | 23140 |     | 23141 |      |   |
| 16.0650848289771    | 75    | 150 | 0     | Open | ; |
| 27906               | 20803 |     | 20880 |      |   |
| 16.0668990632866    | 250   | 100 | 0     | Open | ; |
| 27907               | 23244 |     | 23674 |      |   |
| 16.0856155199945    | 110   | 150 | 0     | Open | ; |
| 27908               | 24942 |     | 24912 |      |   |
| 16.0857578666952    | 100   | 140 | 0     | Open | ; |
| 27909               | 19240 |     | 19241 |      |   |
| 16.0947895595652    | 100   | 140 | 0     | Open | ; |
| 27910               | 23900 |     | 23899 |      |   |
| 17.9783879556786    | 100   | 140 | 0     | Open | ; |
| 27911               | 24033 |     | 25155 |      |   |
| 16.1381281015908    | 250   | 100 | 0     | Open | ; |
| 27912               | 21821 |     | 21822 |      |   |
| 16.1525906828928    | 75    | 140 | 0     | Open | ; |
| 27913               | 24735 |     | 23474 |      |   |

|                  |       |     |       |      |   |
|------------------|-------|-----|-------|------|---|
| 21.9603833920995 | 160   | 150 | 0     | Open | ; |
| 27914            | 22147 |     | 20727 |      |   |
| 16.2087074866824 | 125   | 150 | 0     | Open | ; |
| 27915            | 21961 |     | 21386 |      |   |
| 16.2101509224468 | 110   | 150 | 0     | Open | ; |
| 27916            | 23567 |     | 18878 |      |   |
| 16.2163771042322 | 160   | 150 | 0     | Open | ; |
| 27917            | 23646 |     | 24048 |      |   |
| 17.0688493159847 | 110   | 150 | 0     | Open | ; |
| 27918            | 23224 |     | 23346 |      |   |
| 16.3015126335017 | 100   | 140 | 0     | Open | ; |
| 27919            | 22527 |     | 22345 |      |   |
| 16.3235825600115 | 110   | 150 | 0     | Open | ; |
| 27920            | 24951 |     | 21093 |      |   |
| 16.3651248707116 | 125   | 150 | 0     | Open | ; |
| 27921            | 22709 |     | 20795 |      |   |
| 16.3709273212744 | 110   | 150 | 0     | Open | ; |
| 27922            | 19005 |     | 20797 |      |   |
| 16.4044420925095 | 160   | 150 | 0     | Open | ; |
| 27923            | 19365 |     | 21352 |      |   |
| 16.4233713337591 | 160   | 150 | 0     | Open | ; |
| 27924            | 25026 |     | 23999 |      |   |
| 16.9990759310376 | 110   | 150 | 0     | Open | ; |
| 27925            | 22722 |     | 22723 |      |   |
| 16.4406660944003 | 110   | 150 | 0     | Open | ; |
| 27926            | 21623 |     | 21624 |      |   |
| 16.4504409813198 | 160   | 150 | 0     | Open | ; |
| 27927            | 19339 |     | 18686 |      |   |
| 16.4998722547992 | 100   | 140 | 0     | Open | ; |
| 27928            | 22124 |     | 20082 |      |   |
| 16.5312594374471 | 110   | 150 | 0     | Open | ; |
| 27929            | 20837 |     | 20428 |      |   |
| 16.5430055343143 | 140   | 150 | 0     | Open | ; |
| 27930            | 23184 |     | 23185 |      |   |
| 16.5507943489397 | 110   | 150 | 0     | Open | ; |
| 27931            | 19244 |     | 19245 |      |   |
| 16.5659870330336 | 100   | 100 | 0     | Open | ; |
| 27932            | 21387 |     | 22366 |      |   |
| 16.5979812127377 | 110   | 150 | 0     | Open | ; |
| 27933            | 18602 |     | 18603 |      |   |
| 16.6853243096705 | 110   | 150 | 0     | Open | ; |
| 27934            | 20024 |     | 19001 |      |   |
| 16.6968065480734 | 110   | 150 | 0     | Open | ; |
| 27935            | 22069 |     | 22070 |      |   |
| 16.6990896576203 | 160   | 150 | 0     | Open | ; |
| 27936            | 20336 |     | 22354 |      |   |
| 16.7138560972856 | 110   | 150 | 0     | Open | ; |
| 27937            | 23272 |     | 20422 |      |   |
| 16.7488281783983 | 110   | 150 | 0     | Open | ; |
| 27938            | 24866 |     | 19894 |      |   |

|                     |       |     |       |      |   |
|---------------------|-------|-----|-------|------|---|
| 16.8253509383912    | 200   | 140 | 0     | Open | ; |
| 27939               | 24946 |     | 18916 |      |   |
| 16.8736545472063    | 150   | 140 | 0     | Open | ; |
| 27940               | 18956 |     | 18957 |      |   |
| 16.9115313490969    | 110   | 150 | 0     | Open | ; |
| 27941               | 20289 |     | 21788 |      |   |
| 16.9314351440647    | 110   | 150 | 0     | Open | ; |
| 27942               | 24418 |     | 24419 |      |   |
| 16.976523432132 110 |       | 150 | 0     | Open | ; |
| 27943               | 20321 |     | 21078 |      |   |
| 16.9989173452522    | 150   | 140 | 0     | Open | ; |
| 27944               | 19513 |     | 19514 |      |   |
| 16.9989887132581    | 110   | 150 | 0     | Open | ; |
| 27945               | 22591 |     | 24042 |      |   |
| 16.9990180038892    | 125   | 150 | 0     | Open | ; |
| 27946               | 21518 |     | 21519 |      |   |
| 16.999046048143 160 |       | 150 | 0     | Open | ; |
| 27947               | 22466 |     | 20313 |      |   |
| 16.9991096297755    | 110   | 150 | 0     | Open | ; |
| 27948               | 23724 |     | 23725 |      |   |
| 16.9992718812297    | 150   | 140 | 0     | Open | ; |
| 27949               | 23959 |     | 23960 |      |   |
| 17.0130143513659    | 110   | 150 | 0     | Open | ; |
| 27950               | 22041 |     | 23334 |      |   |
| 17.0186632767051    | 125   | 140 | 0     | Open | ; |
| 27951               | 21663 |     | 19315 |      |   |
| 17.0229390849112    | 250   | 140 | 0     | Open | ; |
| 27952               | 21255 |     | 21403 |      |   |
| 17.0720484139766    | 110   | 150 | 0     | Open | ; |
| 27953               | 23700 |     | 22117 |      |   |
| 17.0728954805794    | 100   | 140 | 0     | Open | ; |
| 27954               | 21882 |     | 19008 |      |   |
| 17.084246187261 110 |       | 150 | 0     | Open | ; |
| 27955               | 20673 |     | 21683 |      |   |
| 17.1309743990895    | 160   | 150 | 0     | Open | ; |
| 27956               | 20345 |     | 20346 |      |   |
| 17.1666256110455    | 110   | 150 | 0     | Open | ; |
| 27957               | 19235 |     | 19236 |      |   |
| 17.1680880239941    | 110   | 150 | 0     | Open | ; |
| 27958               | 24884 |     | 24876 |      |   |
| 17.1885067474343    | 110   | 150 | 0     | Open | ; |
| 27959               | 25011 |     | 24187 |      |   |
| 17.1931567095491    | 250   | 100 | 0     | Open | ; |
| 27960               | 18949 |     | 23117 |      |   |
| 17.2930111227863    | 110   | 150 | 0     | Open | ; |
| 27961               | 24296 |     | 24297 |      |   |
| 17.2947566619089    | 100   | 140 | 0     | Open | ; |
| 27962               | 22634 |     | 22635 |      |   |
| 17.3833431485335    | 250   | 150 | 0     | Open | ; |
| 27963               | 20736 |     | 19244 |      |   |

|                     |       |     |       |      |   |
|---------------------|-------|-----|-------|------|---|
| 17.4513351926648    | 100   | 100 | 0     | Open | ; |
| 27964               | 24500 |     | 24501 |      |   |
| 17.5238104374114    | 160   | 150 | 0     | Open | ; |
| 27965               | 23771 |     | 20439 |      |   |
| 17.585027794547 125 |       | 140 | 0     | Open | ; |
| 27966               | 22528 |     | 22527 |      |   |
| 17.6216391063334    | 110   | 150 | 0     | Open | ; |
| 27967               | 20713 |     | 23460 |      |   |
| 17.6837402580903    | 100   | 140 | 0     | Open | ; |
| 27968               | 23800 |     | 23801 |      |   |
| 17.8201816548976    | 75    | 140 | 0     | Open | ; |
| 27969               | 22954 |     | 25179 |      |   |
| 1.99995694487045    | 100   | 150 | 0     | Open | ; |
| 27970               | 21339 |     | 25635 |      |   |
| 2.00005699956682    | 100   | 150 | 0     | Open | ; |
| 27971               | 21522 |     | 25187 |      |   |
| 2.00005732941863    | 100   | 150 | 0     | Open | ; |
| 27972               | 22865 |     | 25339 |      |   |
| 2.00003936318044    | 100   | 150 | 0     | Open | ; |
| 27973               | 22484 |     | 25300 |      |   |
| 1.99996401259865    | 100   | 150 | 0     | Open | ; |
| 27974               | 22355 |     | 25125 |      |   |
| 2.00006203201912    | 100   | 150 | 0     | Open | ; |
| 27975               | 21844 |     | 25191 |      |   |
| 2.0000592893445 100 |       | 150 | 0     | Open | ; |
| 27976               | 18661 |     | 25513 |      |   |
| 2.00007125155163    | 100   | 150 | 0     | Open | ; |
| 27977               | 23363 |     | 25403 |      |   |
| 2.22181691165033    | 100   | 150 | 0     | Open | ; |
| 27978               | 19399 |     | 25551 |      |   |
| 2.00006001821499    | 100   | 150 | 0     | Open | ; |
| 27979               | 21935 |     | 25505 |      |   |
| 1.99996158601436    | 100   | 150 | 0     | Open | ; |
| 27980               | 18662 |     | 25411 |      |   |
| 2.00007125141957    | 100   | 150 | 0     | Open | ; |
| 27981               | 21678 |     | 25454 |      |   |
| 2.42493450265616    | 100   | 150 | 0     | Open | ; |
| 27982               | 19174 |     | 25385 |      |   |
| 1.99997699519216    | 100   | 150 | 0     | Open | ; |
| 27983               | 20104 |     | 25237 |      |   |
| 2.00006289967301    | 100   | 150 | 0     | Open | ; |
| 27984               | 20554 |     | 25203 |      |   |
| 1.99996372575085    | 100   | 150 | 0     | Open | ; |
| 27985               | 21465 |     | 25372 |      |   |
| 2.0000634886353 100 |       | 150 | 0     | Open | ; |
| 27986               | 19089 |     | 25367 |      |   |
| 2.00006348862456    | 100   | 150 | 0     | Open | ; |
| 27987               | 23840 |     | 25556 |      |   |
| 2.00006380996435    | 100   | 150 | 0     | Open | ; |
| 27988               | 20313 |     | 25445 |      |   |

|                  |       |     |       |      |   |
|------------------|-------|-----|-------|------|---|
| 1.99996415293779 | 100   | 150 | 0     | Open | ; |
| 27989            | 21281 |     | 25258 |      |   |
| 1.07303402207468 | 100   | 150 | 0     | Open | ; |
| 27990            | 20535 |     | 25276 |      |   |
| 2.00006442061564 | 100   | 150 | 0     | Open | ; |
| 27991            | 19521 |     | 25238 |      |   |
| 2.00006503826678 | 100   | 150 | 0     | Open | ; |
| 27992            | 24640 |     | 25168 |      |   |
| 2.00006540980309 | 100   | 150 | 0     | Open | ; |
| 27993            | 23535 |     | 25184 |      |   |
| 2.00001801272847 | 100   | 150 | 0     | Open | ; |
| 27994            | 23092 |     | 25620 |      |   |
| 2.00006564898769 | 100   | 150 | 0     | Open | ; |
| 27995            | 24718 |     | 25417 |      |   |
| 2.00006568720923 | 100   | 150 | 0     | Open | ; |
| 27996            | 20064 |     | 25558 |      |   |
| 2.00006441949531 | 100   | 150 | 0     | Open | ; |
| 27997            | 23929 |     | 25086 |      |   |
| 1.99997023491115 | 100   | 150 | 0     | Open | ; |
| 27998            | 24529 |     | 25667 |      |   |
| 1.99996889436086 | 100   | 150 | 0     | Open | ; |
| 27999            | 24991 |     | 25515 |      |   |
| 2.00006335227918 | 100   | 150 | 0     | Open | ; |
| 28000            | 20568 |     | 25198 |      |   |
| 2.00006932752245 | 100   | 150 | 0     | Open | ; |
| 28001            | 23785 |     | 25584 |      |   |
| 2.00007224823619 | 100   | 150 | 0     | Open | ; |
| 28002            | 19702 |     | 25183 |      |   |
| 2.00007369931212 | 100   | 150 | 0     | Open | ; |
| 28003            | 23489 |     | 25220 |      |   |
| 1.99997605407927 | 100   | 150 | 0     | Open | ; |
| 28004            | 22994 |     | 25557 |      |   |
| 1.99997681514916 | 100   | 150 | 0     | Open | ; |
| 28005            | 21464 |     | 25457 |      |   |
| 2.00007524884591 | 100   | 150 | 0     | Open | ; |
| 28006            | 20567 |     | 25225 |      |   |
| 1.99997657518391 | 100   | 150 | 0     | Open | ; |
| 28007            | 21202 |     | 25380 |      |   |
| 2.00008398901871 | 100   | 150 | 0     | Open | ; |
| 28008            | 22317 |     | 25320 |      |   |
| 2.00007779878629 | 100   | 150 | 0     | Open | ; |
| 28009            | 19980 |     | 25550 |      |   |
| 1.99997795380085 | 100   | 150 | 0     | Open | ; |
| 28010            | 23651 |     | 25383 |      |   |
| 2.00009197894255 | 100   | 150 | 0     | Open | ; |
| 28011            | 23705 |     | 25657 |      |   |
| 1.99998311473618 | 100   | 150 | 0     | Open | ; |
| 28012            | 22377 |     | 25128 |      |   |
| 2.0000570618939  | 100   | 150 | 0     | Open | ; |
| 28013            | 22363 |     | 25511 |      |   |

|                     |       |     |       |      |   |
|---------------------|-------|-----|-------|------|---|
| 2.0000822481413 100 |       | 150 | 0     | Open | ; |
| 28014               | 18908 |     | 25496 |      |   |
| 2.00008252878221    | 100   | 150 | 0     | Open | ; |
| 28015               | 21387 |     | 25527 |      |   |
| 2.00007431069185    | 100   | 150 | 0     | Open | ; |
| 28016               | 18775 |     | 25462 |      |   |
| 2.00008591778453    | 100   | 150 | 0     | Open | ; |
| 28017               | 19924 |     | 25452 |      |   |
| 2.00008604836813    | 100   | 150 | 0     | Open | ; |
| 28018               | 25034 |     | 25477 |      |   |
| 2.00009156849371    | 100   | 150 | 0     | Open | ; |
| 28019               | 24421 |     | 25205 |      |   |
| 2.00016679538716    | 100   | 150 | 0     | Open | ; |
| 28020               | 24859 |     | 25697 |      |   |
| 2.01367271550857    | 100   | 150 | 0     | Open | ; |
| 28021               | 24896 |     | 25705 |      |   |
| 1.9973736280604 100 |       | 150 | 0     | Open | ; |
| 28022               | 24801 |     | 25693 |      |   |
| 2.00007047453123    | 110   | 150 | 0     | Open | ; |
| 28023               | 24620 |     | 25682 |      |   |
| 1.99998060927084    | 100   | 150 | 0     | Open | ; |
| 28024               | 22779 |     | 22780 |      |   |
| 1.42898967448655    | 300   | 140 | 0     | Open | ; |
| 28025               | 24925 |     | 25709 |      |   |
| 2.02849146101763    | 100   | 150 | 0     | Open | ; |
| 28026               | 24663 |     | 25677 |      |   |
| 2.0000113733647 100 |       | 150 | 0     | Open | ; |
| 28027               | 24921 |     | 25710 |      |   |
| 2.01532619330514    | 100   | 150 | 0     | Open | ; |
| 28028               | 24960 |     | 25250 |      |   |
| 2.02206927643838    | 100   | 150 | 0     | Open | ; |
| 28029               | 24614 |     | 25680 |      |   |
| 1.99989260049984    | 100   | 150 | 0     | Open | ; |
| 28030               | 20581 |     | 20583 |      |   |
| 1.46080613288021    | 140   | 150 | 0     | Open | ; |
| 28031               | 23180 |     | 24698 |      |   |
| 1.50589618721495    | 110   | 150 | 0     | Open | ; |
| 28032               | 20984 |     | 23925 |      |   |
| 1.55763264277075    | 350   | 140 | 0     | Open | ; |
| 28033               | 24692 |     | 23174 |      |   |
| 1.55827398457346    | 160   | 150 | 0     | Open | ; |
| 28034               | 20829 |     | 20830 |      |   |
| 1.58834883540935    | 300   | 140 | 0     | Open | ; |
| 28035               | 24711 |     | 24702 |      |   |
| 1.59676951987599    | 110   | 150 | 0     | Open | ; |
| 28036               | 19462 |     | 24266 |      |   |
| 1.59823660668447    | 160   | 150 | 0     | Open | ; |
| 28037               | 20437 |     | 23585 |      |   |
| 1.59834019545981    | 100   | 140 | 0     | Open | ; |
| 28038               | 24688 |     | 24689 |      |   |

|                     |       |     |       |      |   |
|---------------------|-------|-----|-------|------|---|
| 1.60078996126058    | 100   | 150 | 0     | Open | ; |
| 28039               | 20308 |     | 23215 |      |   |
| 1.6028435854185 110 |       | 150 | 0     | Open | ; |
| 28040               | 24440 |     | 24705 |      |   |
| 1.60939822321609    | 200   | 150 | 0     | Open | ; |
| 28041               | 19607 |     | 19608 |      |   |
| 1.61712969551443    | 160   | 150 | 0     | Open | ; |
| 28042               | 23213 |     | 23214 |      |   |
| 1.62298503337534    | 110   | 150 | 0     | Open | ; |
| 28043               | 22452 |     | 22453 |      |   |
| 1.63197860809749    | 160   | 150 | 0     | Open | ; |
| 28044               | 20402 |     | 20403 |      |   |
| 1.64554998796029    | 200   | 150 | 0     | Open | ; |
| 28045               | 24723 |     | 24751 |      |   |
| 1.64962738241608    | 140   | 150 | 0     | Open | ; |
| 28046               | 24717 |     | 24718 |      |   |
| 1.65240443482975    | 150   | 140 | 0     | Open | ; |
| 28047               | 22185 |     | 22187 |      |   |
| 1.66794651389261    | 150   | 140 | 0     | Open | ; |
| 28048               | 24832 |     | 24881 |      |   |
| 1.67806382774729    | 110   | 150 | 0     | Open | ; |
| 28049               | 24831 |     | 24873 |      |   |
| 1.68884795346854    | 110   | 150 | 0     | Open | ; |
| 28050               | 19884 |     | 20878 |      |   |
| 1.68929489760279    | 200   | 150 | 0     | Open | ; |
| 28051               | 18798 |     | 18799 |      |   |
| 1.68933499574951    | 100   | 140 | 0     | Open | ; |
| 28052               | 24737 |     | 24744 |      |   |
| 1.70658970189059    | 110   | 150 | 0     | Open | ; |
| 28053               | 20607 |     | 20608 |      |   |
| 1.71247110865863    | 125   | 150 | 0     | Open | ; |
| 28054               | 18799 |     | 22778 |      |   |
| 1.71983275943875    | 300   | 140 | 0     | Open | ; |
| 28055               | 23716 |     | 22062 |      |   |
| 1.72816775230553    | 400   | 130 | 0     | Open | ; |
| 28056               | 19649 |     | 19650 |      |   |
| 1.73266167818873    | 160   | 150 | 0     | Open | ; |
| 28057               | 24657 |     | 21473 |      |   |
| 1.7469435538131 160 |       | 150 | 0     | Open | ; |
| 28058               | 20183 |     | 20184 |      |   |
| 1.75921031403778    | 110   | 150 | 0     | Open | ; |
| 28059               | 24728 |     | 24734 |      |   |
| 1.77154256272607    | 110   | 150 | 0     | Open | ; |
| 28060               | 24724 |     | 24729 |      |   |
| 1.79584200290801    | 140   | 150 | 0     | Open | ; |
| 28061               | 19580 |     | 20694 |      |   |
| 1.79792568472111    | 160   | 150 | 0     | Open | ; |
| 28062               | 23168 |     | 24709 |      |   |
| 1.79960030278112    | 160   | 150 | 0     | Open | ; |
| 28063               | 20569 |     | 20570 |      |   |

|                  |       |     |       |      |   |
|------------------|-------|-----|-------|------|---|
| 1.82334469055731 | 160   | 150 | 0     | Open | ; |
| 28064            | 22620 |     | 24149 |      |   |
| 1.86606473862808 | 160   | 150 | 0     | Open | ; |
| 28065            | 23504 |     | 24276 |      |   |
| 1.89100957422719 | 250   | 150 | 0     | Open | ; |
| 28066            | 21432 |     | 24380 |      |   |
| 1.90311250865567 | 200   | 140 | 0     | Open | ; |
| 28067            | 24823 |     | 24825 |      |   |
| 1.91312702361879 | 200   | 150 | 0     | Open | ; |
| 28068            | 24310 |     | 24311 |      |   |
| 1.94798466088662 | 100   | 140 | 0     | Open | ; |
| 28069            | 24440 |     | 24438 |      |   |
| 1.95649397686514 | 200   | 150 | 0     | Open | ; |
| 28070            | 24693 |     | 23178 |      |   |
| 1.95847176446833 | 160   | 150 | 0     | Open | ; |
| 28071            | 18834 |     | 18835 |      |   |
| 1.96831895045487 | 110   | 150 | 0     | Open | ; |
| 28072            | 20833 |     | 22263 |      |   |
| 1.98673619725165 | 150   | 140 | 0     | Open | ; |
| 28073            | 24704 |     | 23188 |      |   |
| 1.99279215681547 | 110   | 150 | 0     | Open | ; |
| 28074            | 19403 |     | 19819 |      |   |
| 1.99904895788251 | 160   | 150 | 0     | Open | ; |
| 28075            | 21579 |     | 22477 |      |   |
| 1.99939210735247 | 110   | 150 | 0     | Open | ; |
| 28076            | 19776 |     | 19777 |      |   |
| 1.99969496932922 | 110   | 150 | 0     | Open | ; |
| 28077            | 19815 |     | 19816 |      |   |
| 1.99972745399031 | 110   | 150 | 0     | Open | ; |
| 28078            | 23565 |     | 23566 |      |   |
| 1.99982331654633 | 160   | 150 | 0     | Open | ; |
| 28079            | 21749 |     | 18505 |      |   |
| 1.99982764226423 | 110   | 150 | 0     | Open | ; |
| 28080            | 24033 |     | 24034 |      |   |
| 1.99989582232973 | 250   | 100 | 0     | Open | ; |
| 28081            | 19341 |     | 24078 |      |   |
| 1.99994281179846 | 125   | 140 | 0     | Open | ; |
| 28082            | 22598 |     | 22599 |      |   |
| 1.99994286220595 | 160   | 150 | 0     | Open | ; |
| 28083            | 19537 |     | 19538 |      |   |
| 1.99994384178353 | 125   | 140 | 0     | Open | ; |
| 28084            | 19820 |     | 19985 |      |   |
| 1.99994479214081 | 110   | 150 | 0     | Open | ; |
| 28085            | 20192 |     | 24293 |      |   |
| 1.99994484406235 | 100   | 140 | 0     | Open | ; |
| 28086            | 21544 |     | 23368 |      |   |
| 1.999946879566   | 160   | 150 | 0     | Open | ; |
| 28087            | 19905 |     | 19906 |      |   |
| 1.99994701140892 | 100   | 140 | 0     | Open | ; |
| 28088            | 19436 |     | 19437 |      |   |



|                     |       |     |       |      |   |
|---------------------|-------|-----|-------|------|---|
| 1.99994722466222    | 140   | 150 | 0     | Open | ; |
| 28089               | 18562 |     | 19120 |      |   |
| 1.99994728913304    | 200   | 150 | 0     | Open | ; |
| 28090               | 20619 |     | 22721 |      |   |
| 1.99994737968605    | 110   | 150 | 0     | Open | ; |
| 28091               | 20266 |     | 20791 |      |   |
| 1.99994762031528    | 250   | 140 | 0     | Open | ; |
| 28092               | 20611 |     | 20612 |      |   |
| 1.99994778433084    | 125   | 140 | 0     | Open | ; |
| 28093               | 20510 |     | 18718 |      |   |
| 1.9999478519398 110 |       | 150 | 0     | Open | ; |
| 28094               | 23366 |     | 23370 |      |   |
| 1.9999468785704 160 |       | 150 | 0     | Open | ; |
| 28095               | 23204 |     | 24272 |      |   |
| 1.9999482120478 125 |       | 140 | 0     | Open | ; |
| 28096               | 19705 |     | 19707 |      |   |
| 1.99994828062505    | 125   | 150 | 0     | Open | ; |
| 28097               | 23332 |     | 23710 |      |   |
| 1.99994834184355    | 160   | 150 | 0     | Open | ; |
| 28098               | 22601 |     | 22602 |      |   |
| 1.99994851254314    | 160   | 150 | 0     | Open | ; |
| 28099               | 20511 |     | 20512 |      |   |
| 1.99994860175581    | 125   | 140 | 0     | Open | ; |
| 28100               | 22585 |     | 22586 |      |   |
| 1.99994884128828    | 160   | 150 | 0     | Open | ; |
| 28101               | 21638 |     | 21639 |      |   |
| 1.9999494417987 160 |       | 150 | 0     | Open | ; |
| 28102               | 22401 |     | 22668 |      |   |
| 1.99994972136815    | 125   | 140 | 0     | Open | ; |
| 28103               | 19716 |     | 21965 |      |   |
| 1.99994997159714    | 200   | 150 | 0     | Open | ; |
| 28104               | 19031 |     | 22793 |      |   |
| 1.99994998257254    | 200   | 150 | 0     | Open | ; |
| 28105               | 19673 |     | 19675 |      |   |
| 1.99994998279728    | 200   | 150 | 0     | Open | ; |
| 28106               | 18922 |     | 19916 |      |   |
| 1.99994999151964    | 100   | 140 | 0     | Open | ; |
| 28107               | 21724 |     | 21769 |      |   |
| 1.99995011191251    | 125   | 140 | 0     | Open | ; |
| 28108               | 20125 |     | 21746 |      |   |
| 1.9999502835621 150 |       | 140 | 0     | Open | ; |
| 28109               | 20028 |     | 20030 |      |   |
| 1.99995041111458    | 100   | 140 | 0     | Open | ; |
| 28110               | 21875 |     | 21799 |      |   |
| 1.99995048363347    | 160   | 150 | 0     | Open | ; |
| 28111               | 18805 |     | 18807 |      |   |
| 1.9999504991981 125 |       | 150 | 0     | Open | ; |
| 28112               | 23560 |     | 23561 |      |   |
| 1.99995064222032    | 150   | 140 | 0     | Open | ; |
| 28113               | 21594 |     | 20245 |      |   |

|                     |       |     |       |      |   |
|---------------------|-------|-----|-------|------|---|
| 1.99995064243603    | 250   | 150 | 0     | Open | ; |
| 28114               | 19523 |     | 19640 |      |   |
| 1.99995089930716    | 160   | 150 | 0     | Open | ; |
| 28115               | 21164 |     | 24076 |      |   |
| 1.99995089927177    | 150   | 140 | 0     | Open | ; |
| 28116               | 19474 |     | 19473 |      |   |
| 1.9999509199065 100 |       | 140 | 0     | Open | ; |
| 28117               | 19364 |     | 24387 |      |   |
| 1.99995096182354    | 160   | 150 | 0     | Open | ; |
| 28118               | 21633 |     | 21634 |      |   |
| 1.99995096191169    | 110   | 150 | 0     | Open | ; |
| 28119               | 23219 |     | 23217 |      |   |
| 1.99994997160158    | 200   | 150 | 0     | Open | ; |
| 28120               | 18964 |     | 18965 |      |   |
| 1.99995119156556    | 200   | 100 | 0     | Open | ; |
| 28121               | 19282 |     | 19368 |      |   |
| 1.99995152912427    | 150   | 140 | 0     | Open | ; |
| 28122               | 21094 |     | 19361 |      |   |
| 1.9999515302029 150 |       | 140 | 0     | Open | ; |
| 28123               | 22079 |     | 20527 |      |   |
| 1.99995161191526    | 110   | 150 | 0     | Open | ; |
| 28124               | 22724 |     | 24049 |      |   |
| 1.99995165011024    | 125   | 150 | 0     | Open | ; |
| 28125               | 21251 |     | 23034 |      |   |
| 1.99995172840351    | 160   | 150 | 0     | Open | ; |
| 28126               | 19646 |     | 19166 |      |   |
| 1.99995181174546    | 100   | 140 | 0     | Open | ; |
| 28127               | 19286 |     | 18864 |      |   |
| 1.99995186079113    | 110   | 150 | 0     | Open | ; |
| 28128               | 19894 |     | 19895 |      |   |
| 1.99995193964374    | 200   | 140 | 0     | Open | ; |
| 28129               | 20592 |     | 20593 |      |   |
| 1.99995194077776    | 125   | 150 | 0     | Open | ; |
| 28130               | 22159 |     | 21220 |      |   |
| 1.99995197055552    | 110   | 150 | 0     | Open | ; |
| 28131               | 20516 |     | 23745 |      |   |
| 1.99995200014603    | 250   | 140 | 0     | Open | ; |
| 28132               | 20101 |     | 23653 |      |   |
| 1.9999520612308 200 |       | 150 | 0     | Open | ; |
| 28133               | 19310 |     | 21779 |      |   |
| 1.99995217877418    | 200   | 150 | 0     | Open | ; |
| 28134               | 24029 |     | 22942 |      |   |
| 1.99995224367114    | 160   | 150 | 0     | Open | ; |
| 28135               | 19573 |     | 19574 |      |   |
| 1.9999524516183 100 |       | 140 | 0     | Open | ; |
| 28136               | 24307 |     | 23758 |      |   |
| 1.99995256129381    | 160   | 150 | 0     | Open | ; |
| 28137               | 20994 |     | 24172 |      |   |
| 1.99995260251949    | 100   | 140 | 0     | Open | ; |
| 28138               | 19309 |     | 23194 |      |   |

|                  |       |     |       |      |   |
|------------------|-------|-----|-------|------|---|
| 1.99995287155651 | 100   | 140 | 0     | Open | ; |
| 28139            | 20459 |     | 20460 |      |   |
| 1.99995296881347 | 100   | 140 | 0     | Open | ; |
| 28140            | 22410 |     | 19478 |      |   |
| 1.99995299940251 | 110   | 150 | 0     | Open | ; |
| 28141            | 18558 |     | 22331 |      |   |
| 1.99995300400586 | 200   | 150 | 0     | Open | ; |
| 28142            | 19888 |     | 19889 |      |   |
| 1.99995206235239 | 200   | 150 | 0     | Open | ; |
| 28143            | 19209 |     | 19210 |      |   |
| 1.99995314453076 | 110   | 150 | 0     | Open | ; |
| 28144            | 19742 |     | 23229 |      |   |
| 1.99995319182478 | 160   | 150 | 0     | Open | ; |
| 28145            | 24439 |     | 24706 |      |   |
| 1.99995324462023 | 160   | 150 | 0     | Open | ; |
| 28146            | 23012 |     | 24121 |      |   |
| 1.99995347968048 | 160   | 150 | 0     | Open | ; |
| 28147            | 21131 |     | 22458 |      |   |
| 1.99995352257917 | 100   | 140 | 0     | Open | ; |
| 28148            | 21552 |     | 19955 |      |   |
| 1.9999535820912  | 110   | 150 | 0     | Open | ; |
| 28149            | 21297 |     | 21443 |      |   |
| 1.99995366169355 | 160   | 150 | 0     | Open | ; |
| 28150            | 22011 |     | 22012 |      |   |
| 1.99995368884687 | 125   | 150 | 0     | Open | ; |
| 28151            | 21261 |     | 21259 |      |   |
| 1.99995375233652 | 250   | 140 | 0     | Open | ; |
| 28152            | 19511 |     | 23562 |      |   |
| 1.99995379988913 | 100   | 140 | 0     | Open | ; |
| 28153            | 18637 |     | 23349 |      |   |
| 1.99995386146468 | 100   | 140 | 0     | Open | ; |
| 28154            | 19106 |     | 19102 |      |   |
| 1.99995400205417 | 110   | 150 | 0     | Open | ; |
| 28155            | 19455 |     | 21721 |      |   |
| 1.99995404914586 | 110   | 150 | 0     | Open | ; |
| 28156            | 20360 |     | 20361 |      |   |
| 1.99995404968157 | 100   | 140 | 0     | Open | ; |
| 28157            | 19012 |     | 19013 |      |   |
| 1.99995407176304 | 110   | 150 | 0     | Open | ; |
| 28158            | 19288 |     | 19346 |      |   |
| 1.99995408373442 | 110   | 150 | 0     | Open | ; |
| 28159            | 19886 |     | 19887 |      |   |
| 1.99995408485828 | 200   | 150 | 0     | Open | ; |
| 28160            | 19749 |     | 22274 |      |   |
| 1.99995414437425 | 100   | 140 | 0     | Open | ; |
| 28161            | 23111 |     | 24224 |      |   |
| 1.9999531442428  | 125   | 150 | 0     | Open | ; |
| 28162            | 23837 |     | 21372 |      |   |
| 1.99995420398769 | 125   | 150 | 0     | Open | ; |
| 28163            | 20350 |     | 20351 |      |   |

|                     |       |     |       |      |   |
|---------------------|-------|-----|-------|------|---|
| 1.99995427889121    | 140   | 150 | 0     | Open | ; |
| 28164               | 20692 |     | 20693 |      |   |
| 1.99995436427613    | 250   | 150 | 0     | Open | ; |
| 28165               | 21102 |     | 24240 |      |   |
| 1.99995455140689    | 400   | 130 | 0     | Open | ; |
| 28166               | 24347 |     | 18797 |      |   |
| 1.99995464011515    | 125   | 150 | 0     | Open | ; |
| 28167               | 20268 |     | 19933 |      |   |
| 1.99995506237479    | 250   | 150 | 0     | Open | ; |
| 28168               | 21680 |     | 19541 |      |   |
| 1.99995414451108    | 140   | 150 | 0     | Open | ; |
| 28169               | 22246 |     | 22393 |      |   |
| 1.99995520255167    | 100   | 140 | 0     | Open | ; |
| 28170               | 18573 |     | 18574 |      |   |
| 1.99995527168817    | 110   | 150 | 0     | Open | ; |
| 28171               | 18744 |     | 21169 |      |   |
| 1.99995533306514    | 160   | 150 | 0     | Open | ; |
| 28172               | 19787 |     | 18822 |      |   |
| 1.99995536194537    | 100   | 140 | 0     | Open | ; |
| 28173               | 24079 |     | 24080 |      |   |
| 1.999955372265 110  |       | 150 | 0     | Open | ; |
| 28174               | 22548 |     | 22549 |      |   |
| 1.99995544929069    | 160   | 150 | 0     | Open | ; |
| 28175               | 24373 |     | 23866 |      |   |
| 1.99995552401347    | 140   | 150 | 0     | Open | ; |
| 28176               | 21784 |     | 23325 |      |   |
| 1.99995564221514    | 100   | 140 | 0     | Open | ; |
| 28177               | 21487 |     | 21428 |      |   |
| 1.99995564466773    | 150   | 140 | 0     | Open | ; |
| 28178               | 20363 |     | 19149 |      |   |
| 1.9999558844114 100 |       | 140 | 0     | Open | ; |
| 28179               | 18684 |     | 21710 |      |   |
| 1.9999559846295 100 |       | 140 | 0     | Open | ; |
| 28180               | 20134 |     | 20927 |      |   |
| 1.99995616937565    | 150   | 140 | 0     | Open | ; |
| 28181               | 23966 |     | 23812 |      |   |
| 1.99995626272007    | 200   | 150 | 0     | Open | ; |
| 28182               | 21067 |     | 22285 |      |   |
| 1.99995628941955    | 100   | 140 | 0     | Open | ; |
| 28183               | 21142 |     | 21154 |      |   |
| 1.99995634191287    | 160   | 150 | 0     | Open | ; |
| 28184               | 18638 |     | 24115 |      |   |
| 1.9999563446836 100 |       | 140 | 0     | Open | ; |
| 28185               | 23791 |     | 23129 |      |   |
| 1.99995643158736    | 100   | 140 | 0     | Open | ; |
| 28186               | 23926 |     | 19744 |      |   |
| 1.99995644986375    | 150   | 140 | 0     | Open | ; |
| 28187               | 22840 |     | 22842 |      |   |
| 1.99995647256254    | 150   | 140 | 0     | Open | ; |
| 28188               | 19039 |     | 20444 |      |   |

|                  |       |     |       |      |   |
|------------------|-------|-----|-------|------|---|
| 1.99995653248891 | 200   | 140 | 0     | Open | ; |
| 28189            | 20560 |     | 24337 |      |   |
| 1.99995655907169 | 160   | 150 | 0     | Open | ; |
| 28190            | 21244 |     | 21345 |      |   |
| 1.99995699111575 | 160   | 150 | 0     | Open | ; |
| 28191            | 21982 |     | 24359 |      |   |
| 1.99995700469187 | 160   | 150 | 0     | Open | ; |
| 28192            | 21396 |     | 21033 |      |   |
| 1.99995712433496 | 100   | 140 | 0     | Open | ; |
| 28193            | 19706 |     | 21444 |      |   |
| 1.99995712452758 | 125   | 150 | 0     | Open | ; |
| 28194            | 20208 |     | 22659 |      |   |
| 1.99995716197114 | 110   | 150 | 0     | Open | ; |
| 28195            | 24140 |     | 21065 |      |   |
| 1.99995724871293 | 150   | 140 | 0     | Open | ; |
| 28196            | 19896 |     | 24304 |      |   |
| 1.99995732320491 | 140   | 150 | 0     | Open | ; |
| 28197            | 24157 |     | 24158 |      |   |
| 1.99995742434743 | 200   | 140 | 0     | Open | ; |
| 28198            | 23237 |     | 21453 |      |   |
| 1.99995762544894 | 100   | 140 | 0     | Open | ; |
| 28199            | 22693 |     | 24391 |      |   |
| 1.99995766206924 | 200   | 150 | 0     | Open | ; |
| 28200            | 22171 |     | 21381 |      |   |
| 1.99995772379861 | 450   | 130 | 0     | Open | ; |
| 28201            | 19647 |     | 19648 |      |   |
| 1.99995772480334 | 125   | 140 | 0     | Open | ; |
| 28202            | 21291 |     | 19733 |      |   |
| 1.99995784432256 | 100   | 140 | 0     | Open | ; |
| 28203            | 19040 |     | 19041 |      |   |
| 1.99995802183158 | 100   | 140 | 0     | Open | ; |
| 28204            | 18984 |     | 20817 |      |   |
| 1.99995807183512 | 110   | 150 | 0     | Open | ; |
| 28205            | 18643 |     | 23429 |      |   |
| 1.99995809010016 | 250   | 140 | 0     | Open | ; |
| 28206            | 23565 |     | 18879 |      |   |
| 1.99995813005466 | 160   | 150 | 0     | Open | ; |
| 28207            | 18728 |     | 22010 |      |   |
| 1.99995815188598 | 125   | 150 | 0     | Open | ; |
| 28208            | 18699 |     | 20276 |      |   |
| 1.99995817907382 | 100   | 130 | 0     | Open | ; |
| 28209            | 19127 |     | 21870 |      |   |
| 1.99995821198983 | 125   | 140 | 0     | Open | ; |
| 28210            | 21858 |     | 23876 |      |   |
| 1.99995823160497 | 150   | 100 | 0     | Open | ; |
| 28211            | 21691 |     | 21043 |      |   |
| 1.99995830136398 | 110   | 150 | 0     | Open | ; |
| 28212            | 21141 |     | 21798 |      |   |
| 1.99995830251316 | 160   | 150 | 0     | Open | ; |
| 28213            | 22577 |     | 22667 |      |   |

|                     |       |     |       |      |   |
|---------------------|-------|-----|-------|------|---|
| 7.01611680671602    | 160   | 150 | 0     | Open | ; |
| 28214               | 23112 |     | 23719 |      |   |
| 1.99995851161989    | 125   | 150 | 0     | Open | ; |
| 28215               | 19058 |     | 19059 |      |   |
| 1.99995854238269    | 160   | 150 | 0     | Open | ; |
| 28216               | 23273 |     | 19470 |      |   |
| 1.99995856267719    | 160   | 150 | 0     | Open | ; |
| 28217               | 19698 |     | 19842 |      |   |
| 1.99995857179511    | 140   | 150 | 0     | Open | ; |
| 28218               | 20072 |     | 20071 |      |   |
| 1.99995861039865    | 110   | 150 | 0     | Open | ; |
| 28219               | 20228 |     | 20200 |      |   |
| 1.99995861251441    | 110   | 150 | 0     | Open | ; |
| 28220               | 21788 |     | 20230 |      |   |
| 1.99995861286248    | 110   | 150 | 0     | Open | ; |
| 28221               | 19695 |     | 19793 |      |   |
| 1.99995865182545    | 100   | 140 | 0     | Open | ; |
| 28222               | 20095 |     | 24392 |      |   |
| 1.99995766207305    | 200   | 150 | 0     | Open | ; |
| 28223               | 22195 |     | 22196 |      |   |
| 1.99995772480334    | 160   | 150 | 0     | Open | ; |
| 28224               | 22054 |     | 18881 |      |   |
| 1.99995772493386    | 140   | 150 | 0     | Open | ; |
| 28225               | 18744 |     | 18745 |      |   |
| 1.99995872861079    | 160   | 150 | 0     | Open | ; |
| 28226               | 19609 |     | 19610 |      |   |
| 1.99995881171918    | 160   | 150 | 0     | Open | ; |
| 28227               | 23712 |     | 24317 |      |   |
| 1.99995881289628    | 100   | 140 | 0     | Open | ; |
| 28228               | 20518 |     | 20519 |      |   |
| 1.99995883224373    | 110   | 150 | 0     | Open | ; |
| 28229               | 18511 |     | 18512 |      |   |
| 1.9999590216524 450 |       | 100 | 0     | Open | ; |
| 28230               | 23423 |     | 23502 |      |   |
| 1.99995906168436    | 110   | 150 | 0     | Open | ; |
| 28231               | 21976 |     | 21569 |      |   |
| 1.99995906270651    | 150   | 140 | 0     | Open | ; |
| 28232               | 21852 |     | 20041 |      |   |
| 1.99995910144507    | 140   | 150 | 0     | Open | ; |
| 28233               | 24749 |     | 19708 |      |   |
| 1.99995919975828    | 160   | 150 | 0     | Open | ; |
| 28234               | 23851 |     | 23397 |      |   |
| 1.99995922410387    | 110   | 150 | 0     | Open | ; |
| 28235               | 18914 |     | 20514 |      |   |
| 1.99995936426881    | 250   | 140 | 0     | Open | ; |
| 28236               | 23027 |     | 24133 |      |   |
| 1.99995936563875    | 200   | 150 | 0     | Open | ; |
| 28237               | 20900 |     | 24152 |      |   |
| 1.99995943957969    | 300   | 140 | 0     | Open | ; |
| 28238               | 20736 |     | 19320 |      |   |

|                     |       |     |       |      |   |
|---------------------|-------|-----|-------|------|---|
| 1.99995944014373    | 100   | 100 | 0     | Open | ; |
| 28239               | 21076 |     | 21072 |      |   |
| 1.99995946385645    | 160   | 150 | 0     | Open | ; |
| 28240               | 21725 |     | 21768 |      |   |
| 1.99995946513841    | 125   | 140 | 0     | Open | ; |
| 28241               | 21471 |     | 23885 |      |   |
| 1.99995947176625    | 110   | 150 | 0     | Open | ; |
| 28242               | 23580 |     | 24333 |      |   |
| 1.99995949155198    | 160   | 150 | 0     | Open | ; |
| 28243               | 18749 |     | 20722 |      |   |
| 1.99995952884041    | 250   | 100 | 0     | Open | ; |
| 28244               | 24211 |     | 24212 |      |   |
| 1.99995961223453    | 300   | 140 | 0     | Open | ; |
| 28245               | 22589 |     | 22590 |      |   |
| 1.99995965209943    | 100   | 140 | 0     | Open | ; |
| 28246               | 18999 |     | 19000 |      |   |
| 1.99995972463644    | 125   | 140 | 0     | Open | ; |
| 28247               | 21192 |     | 21196 |      |   |
| 1.9999597615241 100 |       | 140 | 0     | Open | ; |
| 28248               | 19874 |     | 23974 |      |   |
| 1.99995976239589    | 110   | 150 | 0     | Open | ; |
| 28249               | 19613 |     | 19615 |      |   |
| 3.41734576859562    | 125   | 150 | 0     | Open | ; |
| 28250               | 22050 |     | 22048 |      |   |
| 1.99995995114288    | 100   | 140 | 0     | Open | ; |
| 28251               | 19718 |     | 24151 |      |   |
| 1.99995995123011    | 250   | 140 | 0     | Open | ; |
| 28252               | 24373 |     | 24374 |      |   |
| 1.99995995241456    | 140   | 150 | 0     | Open | ; |
| 28253               | 21003 |     | 24007 |      |   |
| 1.99996001883312    | 200   | 150 | 0     | Open | ; |
| 28254               | 20585 |     | 20586 |      |   |
| 1.99996001972841    | 100   | 140 | 0     | Open | ; |
| 28255               | 23268 |     | 24066 |      |   |
| 1.99996009883541    | 160   | 150 | 0     | Open | ; |
| 28256               | 19329 |     | 21744 |      |   |
| 1.99996009931753    | 110   | 150 | 0     | Open | ; |
| 28257               | 21329 |     | 23571 |      |   |
| 1.99996016392463    | 125   | 140 | 0     | Open | ; |
| 28258               | 22899 |     | 21933 |      |   |
| 1.99996021137253    | 125   | 140 | 0     | Open | ; |
| 28259               | 19512 |     | 23280 |      |   |
| 1.99996042240253    | 100   | 140 | 0     | Open | ; |
| 28260               | 22369 |     | 20165 |      |   |
| 1.99996042240375    | 110   | 150 | 0     | Open | ; |
| 28261               | 22675 |     | 23645 |      |   |
| 1.9999605427743 110 |       | 150 | 0     | Open | ; |
| 28262               | 22378 |     | 22469 |      |   |
| 1.99996054546337    | 200   | 150 | 0     | Open | ; |
| 28263               | 20723 |     | 20724 |      |   |

|                     |       |     |       |      |   |
|---------------------|-------|-----|-------|------|---|
| 1.99996061233306    | 110   | 150 | 0     | Open | ; |
| 28264               | 21963 |     | 21964 |      |   |
| 1.99996062487008    | 150   | 140 | 0     | Open | ; |
| 28265               | 21454 |     | 19276 |      |   |
| 1.99996062593647    | 160   | 150 | 0     | Open | ; |
| 28266               | 21473 |     | 19459 |      |   |
| 1.99996070529775    | 160   | 150 | 0     | Open | ; |
| 28267               | 20807 |     | 20808 |      |   |
| 1.9999607292465 160 |       | 150 | 0     | Open | ; |
| 28268               | 20242 |     | 20243 |      |   |
| 1.99996072995116    | 125   | 150 | 0     | Open | ; |
| 28269               | 22546 |     | 22547 |      |   |
| 1.99996094193284    | 100   | 140 | 0     | Open | ; |
| 28270               | 21641 |     | 21643 |      |   |
| 1.99996098363926    | 150   | 140 | 0     | Open | ; |
| 28271               | 23847 |     | 23844 |      |   |
| 1.99996099947181    | 160   | 150 | 0     | Open | ; |
| 28272               | 22552 |     | 22553 |      |   |
| 1.99996001976365    | 125   | 140 | 0     | Open | ; |
| 28273               | 23420 |     | 21958 |      |   |
| 1.9999610395546 110 |       | 150 | 0     | Open | ; |
| 28274               | 23754 |     | 24340 |      |   |
| 1.99996108959495    | 150   | 140 | 0     | Open | ; |
| 28275               | 20404 |     | 21073 |      |   |
| 1.99996112204919    | 110   | 150 | 0     | Open | ; |
| 28276               | 19673 |     | 19674 |      |   |
| 1.99996124970975    | 200   | 150 | 0     | Open | ; |
| 28277               | 20672 |     | 23626 |      |   |
| 1.99996124973225    | 150   | 140 | 0     | Open | ; |
| 28278               | 18848 |     | 19917 |      |   |
| 1.99996129984422    | 100   | 140 | 0     | Open | ; |
| 28279               | 21463 |     | 21307 |      |   |
| 1.99996135967989    | 100   | 140 | 0     | Open | ; |
| 28280               | 21857 |     | 19129 |      |   |
| 1.99996141189056    | 100   | 100 | 0     | Open | ; |
| 28281               | 23903 |     | 23673 |      |   |
| 1.99996042243602    | 100   | 140 | 0     | Open | ; |
| 28282               | 24052 |     | 23261 |      |   |
| 1.99996149134349    | 150   | 140 | 0     | Open | ; |
| 28283               | 18484 |     | 18485 |      |   |
| 1.99996150179704    | 110   | 150 | 0     | Open | ; |
| 28284               | 18838 |     | 18839 |      |   |
| 1.99996150269725    | 125   | 150 | 0     | Open | ; |
| 28285               | 21491 |     | 18771 |      |   |
| 1.99996153928742    | 100   | 140 | 0     | Open | ; |
| 28286               | 21039 |     | 19409 |      |   |
| 1.99996158320229    | 100   | 140 | 0     | Open | ; |
| 28287               | 21987 |     | 23751 |      |   |
| 1.99996160521186    | 160   | 150 | 0     | Open | ; |
| 28288               | 23954 |     | 20867 |      |   |



|                     |       |     |       |      |   |
|---------------------|-------|-----|-------|------|---|
| 1.99996160912431    | 150   | 140 | 0     | Open | ; |
| 28289               | 21068 |     | 19983 |      |   |
| 1.99996160990204    | 100   | 140 | 0     | Open | ; |
| 28290               | 24263 |     | 18868 |      |   |
| 1.99996162427885    | 110   | 150 | 0     | Open | ; |
| 28291               | 19529 |     | 20948 |      |   |
| 1.99996162556628    | 110   | 150 | 0     | Open | ; |
| 28292               | 19096 |     | 19098 |      |   |
| 1.99996162533947    | 110   | 150 | 0     | Open | ; |
| 28293               | 22132 |     | 24367 |      |   |
| 1.99996163239647    | 450   | 100 | 0     | Open | ; |
| 28294               | 21857 |     | 23123 |      |   |
| 1.9999616325943 100 |       | 100 | 0     | Open | ; |
| 28295               | 22849 |     | 22850 |      |   |
| 1.9999617119853 150 |       | 140 | 0     | Open | ; |
| 28296               | 23425 |     | 19331 |      |   |
| 1.99996171290659    | 200   | 150 | 0     | Open | ; |
| 28297               | 19202 |     | 19203 |      |   |
| 1.999961752156 110  |       | 150 | 0     | Open | ; |
| 28298               | 19653 |     | 19654 |      |   |
| 1.99996176205296    | 100   | 140 | 0     | Open | ; |
| 28299               | 22275 |     | 22276 |      |   |
| 1.99996176217526    | 100   | 140 | 0     | Open | ; |
| 28300               | 21349 |     | 22827 |      |   |
| 1.99996177930303    | 450   | 130 | 0     | Open | ; |
| 28301               | 19039 |     | 18464 |      |   |
| 1.99996186462706    | 200   | 140 | 0     | Open | ; |
| 28302               | 23841 |     | 19818 |      |   |
| 1.99996187307864    | 300   | 140 | 0     | Open | ; |
| 28303               | 22605 |     | 22418 |      |   |
| 1.99996194547759    | 200   | 150 | 0     | Open | ; |
| 28304               | 23588 |     | 22293 |      |   |
| 1.99996205047702    | 100   | 140 | 0     | Open | ; |
| 28305               | 19524 |     | 20800 |      |   |
| 1.99996211248433    | 160   | 150 | 0     | Open | ; |
| 28306               | 21650 |     | 21651 |      |   |
| 1.99996211941025    | 160   | 150 | 0     | Open | ; |
| 28307               | 21894 |     | 20502 |      |   |
| 1.99996112205193    | 100   | 140 | 0     | Open | ; |
| 28308               | 22240 |     | 23918 |      |   |
| 1.99996228255047    | 200   | 150 | 0     | Open | ; |
| 28309               | 23086 |     | 23320 |      |   |
| 1.99996232503499    | 100   | 140 | 0     | Open | ; |
| 28310               | 18784 |     | 21750 |      |   |
| 1.9999623247398 110 |       | 150 | 0     | Open | ; |
| 28311               | 19663 |     | 19665 |      |   |
| 1.99996232524765    | 110   | 150 | 0     | Open | ; |
| 28312               | 24341 |     | 24350 |      |   |
| 1.99996241307985    | 200   | 150 | 0     | Open | ; |
| 28313               | 21413 |     | 23339 |      |   |

|                     |       |     |       |      |   |
|---------------------|-------|-----|-------|------|---|
| 1.99996246157017    | 150   | 140 | 0     | Open | ; |
| 28314               | 22068 |     | 20114 |      |   |
| 1.99996246189732    | 110   | 150 | 0     | Open | ; |
| 28315               | 20028 |     | 20029 |      |   |
| 1.99996246260254    | 100   | 140 | 0     | Open | ; |
| 28316               | 20380 |     | 20382 |      |   |
| 1.99996249889935    | 100   | 140 | 0     | Open | ; |
| 28317               | 23778 |     | 20998 |      |   |
| 1.99996249988092    | 110   | 150 | 0     | Open | ; |
| 28318               | 21020 |     | 21021 |      |   |
| 1.99996262220554    | 100   | 140 | 0     | Open | ; |
| 28319               | 23308 |     | 23245 |      |   |
| 1.99996273027814    | 200   | 150 | 0     | Open | ; |
| 28320               | 21148 |     | 19899 |      |   |
| 1.99996276470488    | 110   | 150 | 0     | Open | ; |
| 28321               | 19416 |     | 21371 |      |   |
| 1.99996282505141    | 160   | 150 | 0     | Open | ; |
| 28322               | 18559 |     | 18557 |      |   |
| 1.99996306270389    | 200   | 150 | 0     | Open | ; |
| 28323               | 21893 |     | 21940 |      |   |
| 1.99996112205193    | 100   | 140 | 0     | Open | ; |
| 28324               | 24084 |     | 23985 |      |   |
| 1.99996313200533    | 110   | 150 | 0     | Open | ; |
| 28325               | 23605 |     | 23666 |      |   |
| 1.99996327257816    | 160   | 150 | 0     | Open | ; |
| 28326               | 19400 |     | 23742 |      |   |
| 1.99996331180166    | 110   | 150 | 0     | Open | ; |
| 28327               | 19616 |     | 19617 |      |   |
| 1.99996342452679    | 125   | 150 | 0     | Open | ; |
| 28328               | 19274 |     | 19968 |      |   |
| 1.99996354257691    | 110   | 150 | 0     | Open | ; |
| 28329               | 21784 |     | 19833 |      |   |
| 1.99996357175154    | 100   | 140 | 0     | Open | ; |
| 28330               | 22764 |     | 24264 |      |   |
| 1.99996357192425    | 200   | 150 | 0     | Open | ; |
| 28331               | 24371 |     | 21287 |      |   |
| 1.99996367262811    | 110   | 150 | 0     | Open | ; |
| 28332               | 19890 |     | 19891 |      |   |
| 1.99996367908836    | 200   | 150 | 0     | Open | ; |
| 28333               | 18856 |     | 18857 |      |   |
| 1.99996368022142    | 140   | 150 | 0     | Open | ; |
| 28334               | 22844 |     | 20154 |      |   |
| 1.99996370166404    | 100   | 140 | 0     | Open | ; |
| 28335               | 23312 |     | 18565 |      |   |
| 1.9999637025755 110 |       | 150 | 0     | Open | ; |
| 28336               | 18994 |     | 18996 |      |   |
| 1.99996372176423    | 200   | 140 | 0     | Open | ; |
| 28337               | 23250 |     | 24589 |      |   |
| 1.99996377026813    | 160   | 150 | 0     | Open | ; |
| 28338               | 19236 |     | 21177 |      |   |

|                     |       |     |       |      |   |
|---------------------|-------|-----|-------|------|---|
| 1.99996402578667    | 110   | 150 | 0     | Open | ; |
| 28339               | 21989 |     | 24330 |      |   |
| 1.9999640891979 110 |       | 150 | 0     | Open | ; |
| 28340               | 19703 |     | 19704 |      |   |
| 1.9999640923433 160 |       | 150 | 0     | Open | ; |
| 28341               | 24265 |     | 22625 |      |   |
| 1.99996414159638    | 110   | 140 | 0     | Open | ; |
| 28342               | 18693 |     | 18743 |      |   |
| 1.99996435895932    | 125   | 150 | 0     | Open | ; |
| 28343               | 23435 |     | 23436 |      |   |
| 1.99996436979433    | 110   | 150 | 0     | Open | ; |
| 28344               | 22147 |     | 23396 |      |   |
| 1.99996438282898    | 125   | 150 | 0     | Open | ; |
| 28345               | 21378 |     | 21483 |      |   |
| 1.99996456341339    | 140   | 150 | 0     | Open | ; |
| 28346               | 21397 |     | 21394 |      |   |
| 1.99996456516942    | 100   | 140 | 0     | Open | ; |
| 28347               | 18765 |     | 20416 |      |   |
| 1.9999645795838 125 |       | 150 | 0     | Open | ; |
| 28348               | 19453 |     | 20431 |      |   |
| 1.99996465938094    | 125   | 140 | 0     | Open | ; |
| 28349               | 20945 |     | 20946 |      |   |
| 1.99996466048086    | 250   | 100 | 0     | Open | ; |
| 28350               | 21182 |     | 19251 |      |   |
| 1.99996471209819    | 110   | 150 | 0     | Open | ; |
| 28351               | 22443 |     | 22445 |      |   |
| 1.99996372176423    | 110   | 150 | 0     | Open | ; |
| 28352               | 23632 |     | 24202 |      |   |
| 1.9999648421233 110 |       | 150 | 0     | Open | ; |
| 28353               | 22610 |     | 24370 |      |   |
| 1.99996486509551    | 250   | 140 | 0     | Open | ; |
| 28354               | 20286 |     | 20944 |      |   |
| 1.99996504405358    | 125   | 150 | 0     | Open | ; |
| 28355               | 23500 |     | 19517 |      |   |
| 1.99996520491673    | 160   | 150 | 0     | Open | ; |
| 28356               | 21923 |     | 19979 |      |   |
| 1.99996525132029    | 100   | 140 | 0     | Open | ; |
| 28357               | 21123 |     | 23634 |      |   |
| 1.99996526135565    | 140   | 150 | 0     | Open | ; |
| 28358               | 20266 |     | 20267 |      |   |
| 1.99996526219758    | 250   | 140 | 0     | Open | ; |
| 28359               | 23202 |     | 24284 |      |   |
| 1.99996529948703    | 110   | 150 | 0     | Open | ; |
| 28360               | 24074 |     | 21146 |      |   |
| 1.99996540526152    | 125   | 140 | 0     | Open | ; |
| 28361               | 19263 |     | 22001 |      |   |
| 1.99996550156305    | 110   | 150 | 0     | Open | ; |
| 28362               | 21151 |     | 18711 |      |   |
| 1.99996550303819    | 160   | 150 | 0     | Open | ; |
| 28363               | 19946 |     | 19433 |      |   |

|                     |       |     |       |      |   |
|---------------------|-------|-----|-------|------|---|
| 1.99996569882703    | 140   | 150 | 0     | Open | ; |
| 28364               | 19524 |     | 22650 |      |   |
| 1.99996571076028    | 160   | 150 | 0     | Open | ; |
| 28365               | 23921 |     | 23922 |      |   |
| 1.9999657128626 100 |       | 140 | 0     | Open | ; |
| 28366               | 22281 |     | 22282 |      |   |
| 1.9999657943204 200 |       | 150 | 0     | Open | ; |
| 28367               | 23706 |     | 24323 |      |   |
| 1.99996578494093    | 125   | 150 | 0     | Open | ; |
| 28368               | 18923 |     | 19918 |      |   |
| 1.999964842692 100  |       | 140 | 0     | Open | ; |
| 28369               | 22766 |     | 22692 |      |   |
| 1.99996589247908    | 200   | 150 | 0     | Open | ; |
| 28370               | 23406 |     | 24112 |      |   |
| 1.99996602480741    | 160   | 150 | 0     | Open | ; |
| 28371               | 21052 |     | 20763 |      |   |
| 1.99996603194171    | 150   | 140 | 0     | Open | ; |
| 28372               | 18903 |     | 20958 |      |   |
| 1.99996604954064    | 110   | 150 | 0     | Open | ; |
| 28373               | 20180 |     | 22712 |      |   |
| 1.99996616106161    | 160   | 150 | 0     | Open | ; |
| 28374               | 18529 |     | 18530 |      |   |
| 1.99996630430119    | 250   | 150 | 0     | Open | ; |
| 28375               | 20421 |     | 20447 |      |   |
| 1.9999663048142 160 |       | 150 | 0     | Open | ; |
| 28376               | 23419 |     | 23501 |      |   |
| 1.99996639263577    | 110   | 150 | 0     | Open | ; |
| 28377               | 19902 |     | 19903 |      |   |
| 1.99996649141113    | 125   | 150 | 0     | Open | ; |
| 28378               | 21160 |     | 21401 |      |   |
| 1.99996649221705    | 125   | 150 | 0     | Open | ; |
| 28379               | 22160 |     | 22161 |      |   |
| 1.99996658291477    | 100   | 140 | 0     | Open | ; |
| 28380               | 22206 |     | 22207 |      |   |
| 1.99996664982869    | 200   | 150 | 0     | Open | ; |
| 28381               | 23500 |     | 19516 |      |   |
| 1.99996668453519    | 160   | 150 | 0     | Open | ; |
| 28382               | 21810 |     | 22748 |      |   |
| 1.99996673254893    | 250   | 100 | 0     | Open | ; |
| 28383               | 19486 |     | 24210 |      |   |
| 1.99996673244842    | 150   | 140 | 0     | Open | ; |
| 28384               | 24341 |     | 24342 |      |   |
| 1.99996688986413    | 200   | 150 | 0     | Open | ; |
| 28385               | 23816 |     | 23038 |      |   |
| 1.99996689278591    | 200   | 150 | 0     | Open | ; |
| 28386               | 18737 |     | 18738 |      |   |
| 1.99996692411509    | 125   | 150 | 0     | Open | ; |
| 28387               | 21641 |     | 21644 |      |   |
| 1.99996708235743    | 150   | 140 | 0     | Open | ; |
| 28388               | 23231 |     | 21344 |      |   |

|                     |       |     |       |      |   |
|---------------------|-------|-----|-------|------|---|
| 1.99996708346856    | 160   | 150 | 0     | Open | ; |
| 28389               | 22068 |     | 24077 |      |   |
| 1.99996708322229    | 110   | 150 | 0     | Open | ; |
| 28390               | 23335 |     | 23426 |      |   |
| 1.99996716568858    | 160   | 150 | 0     | Open | ; |
| 28391               | 24349 |     | 19923 |      |   |
| 1.99996724242489    | 200   | 150 | 0     | Open | ; |
| 28392               | 20508 |     | 20509 |      |   |
| 1.99996730263131    | 200   | 130 | 0     | Open | ; |
| 28393               | 18591 |     | 18796 |      |   |
| 1.9999674523314 160 |       | 150 | 0     | Open | ; |
| 28394               | 20178 |     | 20584 |      |   |
| 1.99996745955457    | 160   | 150 | 0     | Open | ; |
| 28395               | 19546 |     | 19547 |      |   |
| 1.99996649276969    | 125   | 150 | 0     | Open | ; |
| 28396               | 20441 |     | 20442 |      |   |
| 1.99996750162157    | 140   | 150 | 0     | Open | ; |
| 28397               | 22232 |     | 22353 |      |   |
| 1.99996750286907    | 140   | 150 | 0     | Open | ; |
| 28398               | 21166 |     | 20610 |      |   |
| 1.99996750439133    | 100   | 140 | 0     | Open | ; |
| 28399               | 19499 |     | 23905 |      |   |
| 1.99996756200424    | 200   | 150 | 0     | Open | ; |
| 28400               | 19553 |     | 19554 |      |   |
| 1.99996756208402    | 250   | 100 | 0     | Open | ; |
| 28401               | 18964 |     | 22336 |      |   |
| 1.999967562211 200  |       | 100 | 0     | Open | ; |
| 28402               | 18828 |     | 24159 |      |   |
| 1.99996756293604    | 160   | 150 | 0     | Open | ; |
| 28403               | 23656 |     | 23834 |      |   |
| 1.99996756313013    | 200   | 150 | 0     | Open | ; |
| 28404               | 20281 |     | 20282 |      |   |
| 1.99996757247018    | 450   | 100 | 0     | Open | ; |
| 28405               | 22673 |     | 22674 |      |   |
| 1.99996769995065    | 125   | 140 | 0     | Open | ; |
| 28406               | 23842 |     | 24176 |      |   |
| 1.99996778259944    | 150   | 140 | 0     | Open | ; |
| 28407               | 18624 |     | 18626 |      |   |
| 1.99996782432635    | 100   | 140 | 0     | Open | ; |
| 28408               | 19029 |     | 19030 |      |   |
| 1.99996785944525    | 200   | 150 | 0     | Open | ; |
| 28409               | 20045 |     | 20046 |      |   |
| 1.99996792215627    | 160   | 150 | 0     | Open | ; |
| 28410               | 21180 |     | 21181 |      |   |
| 1.99996792190887    | 110   | 150 | 0     | Open | ; |
| 28411               | 21690 |     | 21540 |      |   |
| 1.99996792346032    | 100   | 140 | 0     | Open | ; |
| 28412               | 21240 |     | 19458 |      |   |
| 1.99996796215108    | 160   | 150 | 0     | Open | ; |
| 28413               | 23649 |     | 24540 |      |   |

|                     |       |     |       |      |   |
|---------------------|-------|-----|-------|------|---|
| 1.99996799918338    | 200   | 150 | 0     | Open | ; |
| 28414               | 22593 |     | 22594 |      |   |
| 1.9999680643798 140 |       | 150 | 0     | Open | ; |
| 28415               | 20089 |     | 22565 |      |   |
| 1.99996811225757    | 150   | 140 | 0     | Open | ; |
| 28416               | 21594 |     | 20246 |      |   |
| 1.99996818456813    | 250   | 150 | 0     | Open | ; |
| 28417               | 19884 |     | 19885 |      |   |
| 1.99996820900707    | 200   | 150 | 0     | Open | ; |
| 28418               | 21724 |     | 20432 |      |   |
| 1.99996821000975    | 125   | 140 | 0     | Open | ; |
| 28419               | 19771 |     | 24250 |      |   |
| 1.99996821013245    | 250   | 140 | 0     | Open | ; |
| 28420               | 20057 |     | 22796 |      |   |
| 1.99996824506586    | 100   | 140 | 0     | Open | ; |
| 28421               | 23313 |     | 19977 |      |   |
| 1.99996826202215    | 140   | 150 | 0     | Open | ; |
| 28422               | 24795 |     | 24796 |      |   |
| 1.9999682627414 110 |       | 150 | 0     | Open | ; |
| 28423               | 23309 |     | 23089 |      |   |
| 1.9999682642373 125 |       | 150 | 0     | Open | ; |
| 28424               | 22305 |     | 24563 |      |   |
| 1.99996829189385    | 140   | 150 | 0     | Open | ; |
| 28425               | 22544 |     | 21494 |      |   |
| 1.99996829189877    | 125   | 140 | 0     | Open | ; |
| 28426               | 20590 |     | 24565 |      |   |
| 1.99996829302673    | 140   | 150 | 0     | Open | ; |
| 28427               | 21648 |     | 21649 |      |   |
| 1.99996832912167    | 125   | 140 | 0     | Open | ; |
| 28428               | 20525 |     | 20526 |      |   |
| 1.99996832921181    | 250   | 140 | 0     | Open | ; |
| 28429               | 22281 |     | 22508 |      |   |
| 1.99996835258488    | 200   | 150 | 0     | Open | ; |
| 28430               | 18698 |     | 24095 |      |   |
| 1.99996839972471    | 100   | 130 | 0     | Open | ; |
| 28431               | 20466 |     | 20467 |      |   |
| 1.99996750049607    | 140   | 150 | 0     | Open | ; |
| 28432               | 19072 |     | 19073 |      |   |
| 1.99996750286907    | 140   | 150 | 0     | Open | ; |
| 28433               | 22825 |     | 22245 |      |   |
| 1.99996750442477    | 100   | 140 | 0     | Open | ; |
| 28434               | 18513 |     | 18514 |      |   |
| 1.99996851157329    | 450   | 100 | 0     | Open | ; |
| 28435               | 24285 |     | 18653 |      |   |
| 1.99996854540848    | 100   | 140 | 0     | Open | ; |
| 28436               | 23699 |     | 23341 |      |   |
| 1.99996855201319    | 150   | 140 | 0     | Open | ; |
| 28437               | 23030 |     | 20988 |      |   |
| 1.99996756200424    | 200   | 150 | 0     | Open | ; |
| 28438               | 21430 |     | 22771 |      |   |

|                     |       |     |       |      |   |
|---------------------|-------|-----|-------|------|---|
| 1.9999686011934 125 |       | 150 | 0     | Open | ; |
| 28439               | 20949 |     | 21603 |      |   |
| 1.99996877217197    | 125   | 150 | 0     | Open | ; |
| 28440               | 19095 |     | 19103 |      |   |
| 1.99996877231565    | 110   | 150 | 0     | Open | ; |
| 28441               | 18889 |     | 19929 |      |   |
| 1.99996882431732    | 110   | 150 | 0     | Open | ; |
| 28442               | 22024 |     | 23578 |      |   |
| 1.99996903165141    | 125   | 150 | 0     | Open | ; |
| 28443               | 19786 |     | 24220 |      |   |
| 1.99996811191544    | 100   | 140 | 0     | Open | ; |
| 28444               | 22106 |     | 20235 |      |   |
| 1.99996918268725    | 110   | 150 | 0     | Open | ; |
| 28445               | 24533 |     | 24597 |      |   |
| 1.99996921939931    | 160   | 150 | 0     | Open | ; |
| 28446               | 18776 |     | 24014 |      |   |
| 1.9999692515533 160 |       | 150 | 0     | Open | ; |
| 28447               | 19802 |     | 24070 |      |   |
| 1.99996826202215    | 200   | 150 | 0     | Open | ; |
| 28448               | 19763 |     | 24351 |      |   |
| 1.99996928192907    | 200   | 150 | 0     | Open | ; |
| 28449               | 18851 |     | 18852 |      |   |
| 1.99996833024824    | 100   | 140 | 0     | Open | ; |
| 28450               | 18804 |     | 19461 |      |   |
| 1.99996938495198    | 125   | 150 | 0     | Open | ; |
| 28451               | 19550 |     | 19798 |      |   |
| 1.99996944486932    | 160   | 150 | 0     | Open | ; |
| 28452               | 20352 |     | 20353 |      |   |
| 1.99996750286907    | 140   | 150 | 0     | Open | ; |
| 28453               | 19297 |     | 21782 |      |   |
| 1.99996952254996    | 140   | 150 | 0     | Open | ; |
| 28454               | 23267 |     | 18806 |      |   |
| 1.99996954237814    | 125   | 150 | 0     | Open | ; |
| 28455               | 22145 |     | 23717 |      |   |
| 1.99996954540507    | 110   | 150 | 0     | Open | ; |
| 28456               | 23387 |     | 24094 |      |   |
| 1.99996976894089    | 150   | 140 | 0     | Open | ; |
| 28457               | 21528 |     | 19548 |      |   |
| 1.99996979906105    | 140   | 150 | 0     | Open | ; |
| 28458               | 19931 |     | 20886 |      |   |
| 1.99996992487747    | 110   | 150 | 0     | Open | ; |
| 28459               | 19892 |     | 19893 |      |   |
| 1.99996993031433    | 200   | 150 | 0     | Open | ; |
| 28460               | 22478 |     | 20167 |      |   |
| 1.99997008225514    | 125   | 150 | 0     | Open | ; |
| 28461               | 22550 |     | 22551 |      |   |
| 1.99997008413957    | 110   | 150 | 0     | Open | ; |
| 28462               | 19764 |     | 23140 |      |   |
| 1.99997013315973    | 200   | 150 | 0     | Open | ; |
| 28463               | 22157 |     | 24352 |      |   |

|                     |       |     |       |      |   |
|---------------------|-------|-----|-------|------|---|
| 1.99997024185183    | 200   | 150 | 0     | Open | ; |
| 28464               | 24375 |     | 24377 |      |   |
| 1.99997024287148    | 125   | 150 | 0     | Open | ; |
| 28465               | 18503 |     | 18504 |      |   |
| 1.99997030202572    | 110   | 150 | 0     | Open | ; |
| 28466               | 18609 |     | 19377 |      |   |
| 1.99997050494582    | 160   | 150 | 0     | Open | ; |
| 28467               | 19054 |     | 19055 |      |   |
| 1.9999705419647 140 |       | 150 | 0     | Open | ; |
| 28468               | 22963 |     | 22962 |      |   |
| 1.99997056208252    | 110   | 150 | 0     | Open | ; |
| 28469               | 18473 |     | 22581 |      |   |
| 1.99997068343386    | 125   | 150 | 0     | Open | ; |
| 28470               | 23028 |     | 24542 |      |   |
| 1.99996992918475    | 200   | 150 | 0     | Open | ; |
| 28471               | 22608 |     | 22255 |      |   |
| 1.99997094438207    | 110   | 150 | 0     | Open | ; |
| 28472               | 24222 |     | 23764 |      |   |
| 1.99997095213591    | 125   | 150 | 0     | Open | ; |
| 28473               | 22326 |     | 22772 |      |   |
| 1.99997107153398    | 125   | 150 | 0     | Open | ; |
| 28474               | 20908 |     | 21660 |      |   |
| 1.99997111255917    | 150   | 130 | 0     | Open | ; |
| 28475               | 19211 |     | 19212 |      |   |
| 1.99997116203569    | 110   | 150 | 0     | Open | ; |
| 28476               | 18792 |     | 18795 |      |   |
| 1.9999712848833 110 |       | 150 | 0     | Open | ; |
| 28477               | 18507 |     | 18508 |      |   |
| 1.99997030199035    | 110   | 150 | 0     | Open | ; |
| 28478               | 20127 |     | 20792 |      |   |
| 1.99997130503087    | 160   | 150 | 0     | Open | ; |
| 28479               | 20103 |     | 22272 |      |   |
| 1.99997131272814    | 100   | 140 | 0     | Open | ; |
| 28480               | 21831 |     | 19752 |      |   |
| 1.99997132379838    | 100   | 140 | 0     | Open | ; |
| 28481               | 23963 |     | 20858 |      |   |
| 1.99997135215766    | 100   | 140 | 0     | Open | ; |
| 28482               | 22669 |     | 22670 |      |   |
| 1.999971364797 100  |       | 140 | 0     | Open | ; |
| 28483               | 22544 |     | 22545 |      |   |
| 1.99997137007469    | 125   | 140 | 0     | Open | ; |
| 28484               | 18946 |     | 18941 |      |   |
| 1.99997141066265    | 100   | 140 | 0     | Open | ; |
| 28485               | 24102 |     | 23079 |      |   |
| 1.99997150517628    | 100   | 140 | 0     | Open | ; |
| 28486               | 19162 |     | 23855 |      |   |
| 1.99997156289173    | 110   | 150 | 0     | Open | ; |
| 28487               | 21241 |     | 24215 |      |   |
| 1.9999716200241 160 |       | 150 | 0     | Open | ; |
| 28488               | 18624 |     | 18625 |      |   |



|                     |       |     |       |      |   |
|---------------------|-------|-----|-------|------|---|
| 1.99997162005288    | 100   | 140 | 0     | Open | ; |
| 28489               | 23687 |     | 23611 |      |   |
| 1.99997165280919    | 110   | 150 | 0     | Open | ; |
| 28490               | 19215 |     | 19216 |      |   |
| 1.99997170303672    | 160   | 150 | 0     | Open | ; |
| 28491               | 21881 |     | 20398 |      |   |
| 1.99997171212974    | 110   | 150 | 0     | Open | ; |
| 28492               | 20119 |     | 24537 |      |   |
| 1.99996992918475    | 200   | 150 | 0     | Open | ; |
| 28493               | 18590 |     | 19366 |      |   |
| 1.99997200296838    | 160   | 150 | 0     | Open | ; |
| 28494               | 24326 |     | 19293 |      |   |
| 1.99997116203569    | 110   | 150 | 0     | Open | ; |
| 28495               | 19207 |     | 19208 |      |   |
| 1.99997220007697    | 110   | 150 | 0     | Open | ; |
| 28496               | 22719 |     | 24316 |      |   |
| 1.99997219971621    | 200   | 140 | 0     | Open | ; |
| 28497               | 20429 |     | 19321 |      |   |
| 1.99997224968292    | 140   | 150 | 0     | Open | ; |
| 28498               | 24307 |     | 23695 |      |   |
| 1.99997225001332    | 160   | 150 | 0     | Open | ; |
| 28499               | 22427 |     | 22961 |      |   |
| 1.99997225323942    | 110   | 150 | 0     | Open | ; |
| 28500               | 19527 |     | 19643 |      |   |
| 1.99997135153247    | 110   | 150 | 0     | Open | ; |
| 28501               | 20160 |     | 22802 |      |   |
| 1.99997136476172    | 125   | 140 | 0     | Open | ; |
| 28502               | 24052 |     | 23093 |      |   |
| 1.99997240244352    | 150   | 140 | 0     | Open | ; |
| 28503               | 21204 |     | 21517 |      |   |
| 1.9999724316762 160 |       | 150 | 0     | Open | ; |
| 28504               | 21292 |     | 22046 |      |   |
| 1.99997248340824    | 100   | 140 | 0     | Open | ; |
| 28505               | 21256 |     | 21770 |      |   |
| 1.99997249225017    | 110   | 150 | 0     | Open | ; |
| 28506               | 23342 |     | 23789 |      |   |
| 1.99997249948806    | 100   | 140 | 0     | Open | ; |
| 28507               | 20019 |     | 19412 |      |   |
| 1.99997156176306    | 110   | 150 | 0     | Open | ; |
| 28508               | 21083 |     | 21084 |      |   |
| 1.99997264237842    | 125   | 150 | 0     | Open | ; |
| 28509               | 20785 |     | 20786 |      |   |
| 1.99997269255966    | 125   | 150 | 0     | Open | ; |
| 28510               | 18954 |     | 20291 |      |   |
| 1.99997272884293    | 110   | 150 | 0     | Open | ; |
| 28511               | 19188 |     | 23454 |      |   |
| 1.99997286412699    | 200   | 150 | 0     | Open | ; |
| 28512               | 18836 |     | 18837 |      |   |
| 1.99997286525765    | 200   | 150 | 0     | Open | ; |
| 28513               | 18649 |     | 24321 |      |   |

|                  |       |     |       |      |   |
|------------------|-------|-----|-------|------|---|
| 1.9999729220989  | 250   | 100 | 0     | Open | ; |
| 28514            | 20010 |     | 22651 |      |   |
| 1.99997292209448 | 250   | 140 | 0     | Open | ; |
| 28515            | 20508 |     | 24282 |      |   |
| 1.99997297997989 | 200   | 140 | 0     | Open | ; |
| 28516            | 21475 |     | 21763 |      |   |
| 1.99997299931154 | 160   | 150 | 0     | Open | ; |
| 28517            | 18606 |     | 18604 |      |   |
| 1.99997299911991 | 160   | 150 | 0     | Open | ; |
| 28518            | 21989 |     | 23697 |      |   |
| 1.99997299983875 | 110   | 150 | 0     | Open | ; |
| 28519            | 20378 |     | 20379 |      |   |
| 1.99997312475216 | 200   | 150 | 0     | Open | ; |
| 28520            | 20249 |     | 20250 |      |   |
| 1.99997312471719 | 200   | 150 | 0     | Open | ; |
| 28521            | 20770 |     | 20787 |      |   |
| 1.99997316016962 | 110   | 150 | 0     | Open | ; |
| 28522            | 20358 |     | 20359 |      |   |
| 1.99997322006572 | 160   | 150 | 0     | Open | ; |
| 28523            | 20755 |     | 24547 |      |   |
| 1.99997335266553 | 200   | 150 | 0     | Open | ; |
| 28524            | 20959 |     | 21106 |      |   |
| 1.99997240329163 | 110   | 150 | 0     | Open | ; |
| 28525            | 20818 |     | 20111 |      |   |
| 1.99997346198014 | 100   | 140 | 0     | Open | ; |
| 28526            | 24310 |     | 24312 |      |   |
| 1.99997249225017 | 100   | 140 | 0     | Open | ; |
| 28527            | 18898 |     | 18900 |      |   |
| 1.9999736617223  | 160   | 150 | 0     | Open | ; |
| 28528            | 21501 |     | 19960 |      |   |
| 1.99997368186206 | 160   | 150 | 0     | Open | ; |
| 28529            | 20734 |     | 22622 |      |   |
| 1.99997374468231 | 200   | 150 | 0     | Open | ; |
| 28530            | 19385 |     | 20912 |      |   |
| 1.99997383929401 | 450   | 140 | 0     | Open | ; |
| 28531            | 24105 |     | 23802 |      |   |
| 1.99997391163453 | 110   | 150 | 0     | Open | ; |
| 28532            | 18847 |     | 18770 |      |   |
| 1.99997398227541 | 100   | 140 | 0     | Open | ; |
| 28533            | 21097 |     | 21332 |      |   |
| 1.99997401240025 | 160   | 150 | 0     | Open | ; |
| 28534            | 23856 |     | 19163 |      |   |
| 1.9999740499182  | 125   | 150 | 0     | Open | ; |
| 28535            | 22486 |     | 22710 |      |   |
| 1.99997405005868 | 110   | 150 | 0     | Open | ; |
| 28536            | 19020 |     | 19021 |      |   |
| 1.99997422550233 | 250   | 140 | 0     | Open | ; |
| 28537            | 20134 |     | 20926 |      |   |
| 1.99997431222125 | 150   | 140 | 0     | Open | ; |
| 28538            | 24327 |     | 23614 |      |   |

|                     |       |     |       |      |   |
|---------------------|-------|-----|-------|------|---|
| 1.99997434583896    | 200   | 150 | 0     | Open | ; |
| 28539               | 18582 |     | 22093 |      |   |
| 1.99997440273204    | 160   | 150 | 0     | Open | ; |
| 28540               | 19360 |     | 21407 |      |   |
| 1.99997442481522    | 150   | 140 | 0     | Open | ; |
| 28541               | 19970 |     | 24303 |      |   |
| 1.99997446170794    | 140   | 150 | 0     | Open | ; |
| 28542               | 18525 |     | 20809 |      |   |
| 1.99997446272227    | 160   | 150 | 0     | Open | ; |
| 28543               | 23469 |     | 23465 |      |   |
| 1.99997453201178    | 300   | 140 | 0     | Open | ; |
| 28544               | 19921 |     | 24229 |      |   |
| 1.99997453289547    | 200   | 140 | 0     | Open | ; |
| 28545               | 24110 |     | 24111 |      |   |
| 1.99997454507117    | 450   | 100 | 0     | Open | ; |
| 28546               | 24064 |     | 19386 |      |   |
| 1.99997456238284    | 500   | 130 | 0     | Open | ; |
| 28547               | 18875 |     | 23490 |      |   |
| 1.99997460503735    | 100   | 140 | 0     | Open | ; |
| 28548               | 23663 |     | 23677 |      |   |
| 1.99997366285751    | 110   | 150 | 0     | Open | ; |
| 28549               | 19299 |     | 23811 |      |   |
| 1.99997474229073    | 160   | 150 | 0     | Open | ; |
| 28550               | 22127 |     | 20689 |      |   |
| 1.99997476461172    | 150   | 140 | 0     | Open | ; |
| 28551               | 24331 |     | 24332 |      |   |
| 2.67311338957006    | 200   | 150 | 0     | Open | ; |
| 28553               | 21766 |     | 19285 |      |   |
| 1.99997506247876    | 125   | 140 | 0     | Open | ; |
| 28554               | 19128 |     | 24124 |      |   |
| 1.99997506488723    | 125   | 140 | 0     | Open | ; |
| 28555               | 20065 |     | 22212 |      |   |
| 1.99997507990172    | 125   | 140 | 0     | Open | ; |
| 28556               | 23448 |     | 24198 |      |   |
| 1.99997512214421    | 150   | 140 | 0     | Open | ; |
| 28557               | 19262 |     | 21185 |      |   |
| 1.99997514469739    | 110   | 150 | 0     | Open | ; |
| 28558               | 21486 |     | 24302 |      |   |
| 1.99997526207919    | 200   | 150 | 0     | Open | ; |
| 28559               | 21485 |     | 24163 |      |   |
| 1.99997532469912    | 200   | 150 | 0     | Open | ; |
| 28560               | 20908 |     | 20909 |      |   |
| 1.99997532938317    | 150   | 130 | 0     | Open | ; |
| 28561               | 23011 |     | 24122 |      |   |
| 1.99997538411539    | 160   | 150 | 0     | Open | ; |
| 28562               | 21239 |     | 18710 |      |   |
| 1.9999753859009 160 |       | 150 | 0     | Open | ; |
| 28563               | 19908 |     | 19909 |      |   |
| 1.99997545276045    | 150   | 140 | 0     | Open | ; |
| 28564               | 24531 |     | 23607 |      |   |

|                  |       |     |       |      |   |
|------------------|-------|-----|-------|------|---|
| 1.99997546020399 | 110   | 150 | 0     | Open | ; |
| 28565            | 21659 |     | 24063 |      |   |
| 1.99997556527842 | 250   | 140 | 0     | Open | ; |
| 28566            | 20839 |     | 20840 |      |   |
| 1.12637631032386 | 140   | 150 | 0     | Open | ; |
| 28567            | 22913 |     | 23806 |      |   |
| 1.99997573225239 | 125   | 140 | 0     | Open | ; |
| 28568            | 24221 |     | 24256 |      |   |
| 1.99997474223096 | 125   | 140 | 0     | Open | ; |
| 28569            | 24088 |     | 23298 |      |   |
| 1.99997575199506 | 160   | 150 | 0     | Open | ; |
| 28570            | 23345 |     | 21222 |      |   |
| 1.99997578173687 | 110   | 150 | 0     | Open | ; |
| 28571            | 21346 |     | 19998 |      |   |
| 1.99997579187152 | 125   | 150 | 0     | Open | ; |
| 28572            | 21112 |     | 24024 |      |   |
| 1.99997579280694 | 110   | 150 | 0     | Open | ; |
| 28573            | 19939 |     | 21071 |      |   |
| 1.99997602635722 | 110   | 150 | 0     | Open | ; |
| 28574            | 23263 |     | 24328 |      |   |
| 1.99997604445459 | 300   | 140 | 0     | Open | ; |
| 28575            | 20848 |     | 20846 |      |   |
| 1.99997608294014 | 100   | 140 | 0     | Open | ; |
| 28576            | 22450 |     | 22451 |      |   |
| 1.99997610021944 | 160   | 150 | 0     | Open | ; |
| 28577            | 21221 |     | 20260 |      |   |
| 1.99997512206515 | 100   | 140 | 0     | Open | ; |
| 28578            | 22539 |     | 22540 |      |   |
| 1.99997618474139 | 160   | 150 | 0     | Open | ; |
| 28579            | 19027 |     | 19028 |      |   |
| 1.99997626214209 | 100   | 140 | 0     | Open | ; |
| 28580            | 21134 |     | 19754 |      |   |
| 1.99997626390469 | 100   | 140 | 0     | Open | ; |
| 28581            | 21334 |     | 23521 |      |   |
| 1.99997633282649 | 125   | 150 | 0     | Open | ; |
| 28582            | 18884 |     | 18603 |      |   |
| 1.99997648995342 | 160   | 150 | 0     | Open | ; |
| 28583            | 19003 |     | 19004 |      |   |
| 1.99997650031025 | 160   | 150 | 0     | Open | ; |
| 28584            | 20050 |     | 20051 |      |   |
| 1.99997649994322 | 125   | 150 | 0     | Open | ; |
| 28585            | 18824 |     | 23338 |      |   |
| 1.99997650040475 | 100   | 140 | 0     | Open | ; |
| 28586            | 18719 |     | 18721 |      |   |
| 1.99997657298543 | 100   | 140 | 0     | Open | ; |
| 28587            | 18713 |     | 21800 |      |   |
| 1.99997661329611 | 110   | 150 | 0     | Open | ; |
| 28588            | 23345 |     | 21219 |      |   |
| 1.99997662232311 | 110   | 150 | 0     | Open | ; |
| 28589            | 19620 |     | 19621 |      |   |

|                  |       |     |       |      |   |
|------------------|-------|-----|-------|------|---|
| 1.9999767198895  | 200   | 150 | 0     | Open | ; |
| 28590            | 23246 |     | 20888 |      |   |
| 1.99997575217863 | 200   | 150 | 0     | Open | ; |
| 28591            | 21116 |     | 19317 |      |   |
| 1.99997681196085 | 110   | 150 | 0     | Open | ; |
| 28592            | 21396 |     | 21032 |      |   |
| 1.99997681247276 | 100   | 140 | 0     | Open | ; |
| 28593            | 21809 |     | 21801 |      |   |
| 1.99997689968064 | 160   | 150 | 0     | Open | ; |
| 28594            | 22675 |     | 22676 |      |   |
| 1.99997692412072 | 110   | 150 | 0     | Open | ; |
| 28595            | 20279 |     | 20280 |      |   |
| 1.99997700500468 | 125   | 150 | 0     | Open | ; |
| 28596            | 24214 |     | 21962 |      |   |
| 1.99997602533484 | 100   | 140 | 0     | Open | ; |
| 28597            | 19232 |     | 21303 |      |   |
| 1.99997604463357 | 110   | 150 | 0     | Open | ; |
| 28598            | 18896 |     | 18897 |      |   |
| 1.99997722607462 | 160   | 150 | 0     | Open | ; |
| 28599            | 19999 |     | 19449 |      |   |
| 1.99997742474547 | 110   | 150 | 0     | Open | ; |
| 28600            | 22008 |     | 22009 |      |   |
| 1.99997748467799 | 140   | 150 | 0     | Open | ; |
| 28601            | 19560 |     | 24069 |      |   |
| 1.99997758241404 | 150   | 140 | 0     | Open | ; |
| 28602            | 21652 |     | 19821 |      |   |
| 1.9999776249427  | 140   | 150 | 0     | Open | ; |
| 28603            | 19204 |     | 19205 |      |   |
| 1.99997765188932 | 110   | 150 | 0     | Open | ; |
| 28604            | 18590 |     | 24346 |      |   |
| 1.99997767163061 | 160   | 150 | 0     | Open | ; |
| 28605            | 19896 |     | 19897 |      |   |
| 1.99997767287945 | 140   | 150 | 0     | Open | ; |
| 28606            | 20900 |     | 24174 |      |   |
| 1.99997671984746 | 300   | 140 | 0     | Open | ; |
| 28607            | 20793 |     | 22335 |      |   |
| 1.99997780240892 | 125   | 150 | 0     | Open | ; |
| 28608            | 21378 |     | 19238 |      |   |
| 1.99997782303418 | 140   | 150 | 0     | Open | ; |
| 28609            | 18501 |     | 18502 |      |   |
| 1.99997788311428 | 110   | 150 | 0     | Open | ; |
| 28610            | 22401 |     | 21731 |      |   |
| 1.99997806307558 | 125   | 140 | 0     | Open | ; |
| 28611            | 21291 |     | 21441 |      |   |
| 1.99997808479037 | 100   | 140 | 0     | Open | ; |
| 28612            | 20341 |     | 22456 |      |   |
| 1.99997812519458 | 160   | 150 | 0     | Open | ; |
| 28613            | 18875 |     | 21645 |      |   |
| 1.99997821242186 | 100   | 140 | 0     | Open | ; |
| 28614            | 22513 |     | 22514 |      |   |

|                  |       |     |       |      |   |
|------------------|-------|-----|-------|------|---|
| 1.999978341945   | 160   | 150 | 0     | Open | ; |
| 28615            | 22634 |     | 22757 |      |   |
| 1.9999783430685  | 250   | 150 | 0     | Open | ; |
| 28616            | 18858 |     | 18859 |      |   |
| 1.99997848523806 | 150   | 140 | 0     | Open | ; |
| 28617            | 20184 |     | 20790 |      |   |
| 1.99997850012226 | 110   | 150 | 0     | Open | ; |
| 28618            | 19522 |     | 19823 |      |   |
| 1.99997852360501 | 200   | 150 | 0     | Open | ; |
| 28619            | 20603 |     | 20604 |      |   |
| 1.99997852542092 | 200   | 150 | 0     | Open | ; |
| 28620            | 22122 |     | 20688 |      |   |
| 1.99997858206441 | 150   | 140 | 0     | Open | ; |
| 28621            | 21609 |     | 22753 |      |   |
| 1.99997858258179 | 150   | 140 | 0     | Open | ; |
| 28622            | 21089 |     | 21090 |      |   |
| 1.99997863982678 | 200   | 150 | 0     | Open | ; |
| 28623            | 20634 |     | 24247 |      |   |
| 1.99997863999007 | 100   | 140 | 0     | Open | ; |
| 28624            | 20803 |     | 20804 |      |   |
| 1.9999787455463  | 250   | 100 | 0     | Open | ; |
| 28625            | 19003 |     | 20824 |      |   |
| 1.99997884962746 | 160   | 150 | 0     | Open | ; |
| 28626            | 20273 |     | 20274 |      |   |
| 1.99997884984242 | 250   | 140 | 0     | Open | ; |
| 28627            | 22063 |     | 23417 |      |   |
| 1.9999788649758  | 100   | 140 | 0     | Open | ; |
| 28628            | 21081 |     | 21082 |      |   |
| 1.99997887261621 | 125   | 150 | 0     | Open | ; |
| 28629            | 22592 |     | 19091 |      |   |
| 1.99997904424579 | 110   | 150 | 0     | Open | ; |
| 28630            | 22522 |     | 22523 |      |   |
| 1.99997904612081 | 250   | 140 | 0     | Open | ; |
| 28631            | 19441 |     | 23947 |      |   |
| 1.99997806307141 | 140   | 150 | 0     | Open | ; |
| 28632            | 18641 |     | 24325 |      |   |
| 1.99997914124535 | 250   | 140 | 0     | Open | ; |
| 28633            | 20637 |     | 24260 |      |   |
| 1.99997914237424 | 200   | 140 | 0     | Open | ; |
| 28634            | 18847 |     | 19915 |      |   |
| 1.99997924982762 | 100   | 140 | 0     | Open | ; |
| 28635            | 23190 |     | 24279 |      |   |
| 1.99997930291195 | 160   | 150 | 0     | Open | ; |
| 28636            | 21260 |     | 19381 |      |   |
| 1.99997932548919 | 150   | 140 | 0     | Open | ; |
| 28637            | 23262 |     | 22298 |      |   |
| 1.99997852473783 | 100   | 140 | 0     | Open | ; |
| 28638            | 23284 |     | 19181 |      |   |
| 1.99997957192375 | 125   | 140 | 0     | Open | ; |
| 28639            | 21406 |     | 22755 |      |   |

|                     |       |     |       |      |   |
|---------------------|-------|-----|-------|------|---|
| 1.99997863942378    | 400   | 130 | 0     | Open | ; |
| 28640               | 22664 |     | 22665 |      |   |
| 1.99997972980953    | 100   | 140 | 0     | Open | ; |
| 28641               | 21097 |     | 24113 |      |   |
| 1.99997974255263    | 160   | 150 | 0     | Open | ; |
| 28642               | 19791 |     | 21288 |      |   |
| 1.99997982498418    | 150   | 140 | 0     | Open | ; |
| 28643               | 20486 |     | 20487 |      |   |
| 1.99997989223859    | 400   | 130 | 0     | Open | ; |
| 28644               | 22689 |     | 22254 |      |   |
| 1.9999800331113 125 |       | 150 | 0     | Open | ; |
| 28645               | 18961 |     | 18963 |      |   |
| 1.99998004245753    | 250   | 100 | 0     | Open | ; |
| 28646               | 21830 |     | 21133 |      |   |
| 1.99997806307141    | 100   | 140 | 0     | Open | ; |
| 28647               | 23851 |     | 24025 |      |   |
| 1.99998012440079    | 110   | 150 | 0     | Open | ; |
| 28648               | 22873 |     | 19825 |      |   |
| 1.99998012503873    | 200   | 150 | 0     | Open | ; |
| 28649               | 18813 |     | 21477 |      |   |
| 1.99998012555058    | 110   | 150 | 0     | Open | ; |
| 28650               | 22166 |     | 22167 |      |   |
| 1.99998028461119    | 125   | 150 | 0     | Open | ; |
| 28651               | 21136 |     | 21461 |      |   |
| 1.99998028962561    | 110   | 150 | 0     | Open | ; |
| 28652               | 22187 |     | 22731 |      |   |
| 1.99998031987946    | 150   | 140 | 0     | Open | ; |
| 28653               | 19509 |     | 24225 |      |   |
| 1.99998042588087    | 150   | 140 | 0     | Open | ; |
| 28654               | 18761 |     | 19637 |      |   |
| 1.9999805247322 125 |       | 150 | 0     | Open | ; |
| 28655               | 23334 |     | 19796 |      |   |
| 1.99998056967247    | 125   | 140 | 0     | Open | ; |
| 28656               | 21758 |     | 21756 |      |   |
| 1.99998057062823    | 110   | 150 | 0     | Open | ; |
| 28657               | 21342 |     | 23375 |      |   |
| 1.99998067273428    | 110   | 150 | 0     | Open | ; |
| 28658               | 18701 |     | 18888 |      |   |
| 1.99998070291767    | 110   | 150 | 0     | Open | ; |
| 28659               | 22159 |     | 19259 |      |   |
| 1.99998072524361    | 110   | 150 | 0     | Open | ; |
| 28660               | 22195 |     | 22560 |      |   |
| 1.99998072518984    | 160   | 150 | 0     | Open | ; |
| 28661               | 21286 |     | 19734 |      |   |
| 1.9999798250192 100 |       | 150 | 0     | Open | ; |
| 28662               | 20270 |     | 19850 |      |   |
| 1.99998088473285    | 300   | 140 | 0     | Open | ; |
| 28663               | 20861 |     | 24318 |      |   |
| 1.99998089956775    | 100   | 140 | 0     | Open | ; |
| 28664               | 21994 |     | 21139 |      |   |

|                     |       |     |       |      |   |
|---------------------|-------|-----|-------|------|---|
| 1.99998089956689    | 125   | 150 | 0     | Open | ; |
| 28665               | 20609 |     | 19160 |      |   |
| 1.99998098313734    | 110   | 150 | 0     | Open | ; |
| 28666               | 21523 |     | 21516 |      |   |
| 1.99998099947845    | 160   | 150 | 0     | Open | ; |
| 28667               | 23720 |     | 23718 |      |   |
| 1.99998012441464    | 110   | 150 | 0     | Open | ; |
| 28668               | 21490 |     | 24143 |      |   |
| 1.99998116994733    | 250   | 140 | 0     | Open | ; |
| 28669               | 21854 |     | 22798 |      |   |
| 1.99998124932281    | 125   | 140 | 0     | Open | ; |
| 28670               | 22579 |     | 22580 |      |   |
| 1.99998125017727    | 125   | 150 | 0     | Open | ; |
| 28671               | 24114 |     | 22300 |      |   |
| 1.99998136193458    | 200   | 140 | 0     | Open | ; |
| 28672               | 21696 |     | 19549 |      |   |
| 1.99998138504886    | 140   | 150 | 0     | Open | ; |
| 28673               | 20643 |     | 20645 |      |   |
| 1.99998156237422    | 100   | 140 | 0     | Open | ; |
| 28674               | 22135 |     | 23195 |      |   |
| 1.9999805696294 110 |       | 150 | 0     | Open | ; |
| 28675               | 18633 |     | 21080 |      |   |
| 1.99998165014238    | 160   | 150 | 0     | Open | ; |
| 28676               | 19690 |     | 22521 |      |   |
| 1.99998173255223    | 300   | 140 | 0     | Open | ; |
| 28677               | 20674 |     | 20765 |      |   |
| 1.99998179933689    | 125   | 150 | 0     | Open | ; |
| 28678               | 18499 |     | 18500 |      |   |
| 1.99998181281126    | 110   | 150 | 0     | Open | ; |
| 28679               | 20452 |     | 20684 |      |   |
| 1.99998187240078    | 160   | 150 | 0     | Open | ; |
| 28680               | 18613 |     | 19974 |      |   |
| 1.99998206237597    | 140   | 150 | 0     | Open | ; |
| 28681               | 19791 |     | 24306 |      |   |
| 1.99998206276823    | 150   | 140 | 0     | Open | ; |
| 28682               | 19670 |     | 19672 |      |   |
| 1.9999820624889 200 |       | 150 | 0     | Open | ; |
| 28683               | 22634 |     | 22758 |      |   |
| 1.39563203495264    | 250   | 150 | 0     | Open | ; |
| 28684               | 20107 |     | 24280 |      |   |
| 1.99998209967811    | 125   | 150 | 0     | Open | ; |
| 28685               | 24087 |     | 24130 |      |   |
| 1.99998224237305    | 110   | 150 | 0     | Open | ; |
| 28686               | 20362 |     | 19151 |      |   |
| 1.99998226026046    | 100   | 140 | 0     | Open | ; |
| 28687               | 18668 |     | 22815 |      |   |
| 1.99998232545955    | 110   | 150 | 0     | Open | ; |
| 28688               | 19848 |     | 19846 |      |   |
| 1.99998233018442    | 110   | 150 | 0     | Open | ; |
| 28689               | 22168 |     | 21885 |      |   |



|                     |       |     |       |      |   |
|---------------------|-------|-----|-------|------|---|
| 1.99998235292403    | 125   | 150 | 0     | Open | ; |
| 28690               | 19087 |     | 23854 |      |   |
| 1.99998249039701    | 125   | 150 | 0     | Open | ; |
| 28691               | 24274 |     | 23200 |      |   |
| 1.99998251209511    | 300   | 140 | 0     | Open | ; |
| 28692               | 21547 |     | 21513 |      |   |
| 1.99998254238701    | 160   | 150 | 0     | Open | ; |
| 28693               | 22582 |     | 22583 |      |   |
| 1.99998256132874    | 100   | 140 | 0     | Open | ; |
| 28694               | 23309 |     | 23917 |      |   |
| 1.99998256253371    | 125   | 150 | 0     | Open | ; |
| 28695               | 19981 |     | 23743 |      |   |
| 1.9999826532513 110 |       | 150 | 0     | Open | ; |
| 28696               | 18598 |     | 21006 |      |   |
| 1.99998266230976    | 150   | 140 | 0     | Open | ; |
| 28697               | 22002 |     | 22003 |      |   |
| 1.99998271349111    | 150   | 140 | 0     | Open | ; |
| 28698               | 18969 |     | 22791 |      |   |
| 1.99998276469948    | 100   | 140 | 0     | Open | ; |
| 28699               | 20001 |     | 20002 |      |   |
| 1.99998281188416    | 150   | 140 | 0     | Open | ; |
| 28700               | 21467 |     | 19864 |      |   |
| 1.99998292458141    | 200   | 150 | 0     | Open | ; |
| 28701               | 21466 |     | 20986 |      |   |
| 1.99998292560125    | 200   | 150 | 0     | Open | ; |
| 28702               | 18827 |     | 23300 |      |   |
| 1.99998298324103    | 110   | 150 | 0     | Open | ; |
| 28703               | 19325 |     | 20060 |      |   |
| 1.99998302416516    | 300   | 140 | 0     | Open | ; |
| 28704               | 23520 |     | 18869 |      |   |
| 1.99998206237597    | 110   | 150 | 0     | Open | ; |
| 28705               | 19225 |     | 19488 |      |   |
| 1.99998306521667    | 110   | 150 | 0     | Open | ; |
| 28706               | 20587 |     | 21973 |      |   |
| 1.99998307225192    | 125   | 140 | 0     | Open | ; |
| 28707               | 18915 |     | 24170 |      |   |
| 1.9999821000098 250 |       | 140 | 0     | Open | ; |
| 28708               | 20292 |     | 24185 |      |   |
| 1.99998329188453    | 150   | 140 | 0     | Open | ; |
| 28709               | 24222 |     | 24223 |      |   |
| 1.99998343982018    | 125   | 150 | 0     | Open | ; |
| 28710               | 18551 |     | 22794 |      |   |
| 1.99998352199992    | 396.6 | 140 | 0     | Open | ; |
| 28711               | 20117 |     | 24544 |      |   |
| 1.99998356276771    | 200   | 150 | 0     | Open | ; |
| 28712               | 20236 |     | 20237 |      |   |
| 1.99998356287746    | 110   | 150 | 0     | Open | ; |
| 28713               | 19020 |     | 22752 |      |   |
| 1.99998361255796    | 250   | 140 | 0     | Open | ; |
| 28714               | 19048 |     | 19049 |      |   |

|                     |       |     |       |  |      |   |
|---------------------|-------|-----|-------|--|------|---|
| 1.9999828124008 100 |       | 140 | 0     |  | Open | ; |
| 28715               | 21319 |     | 20732 |  |      |   |
| 1.999983912197 150  |       | 140 | 0     |  | Open | ; |
| 28716               | 22913 |     | 22916 |  |      |   |
| 1.9999829245857 125 |       | 140 | 0     |  | Open | ; |
| 28717               | 19408 |     | 23511 |  |      |   |
| 1.99998399215487    | 100   | 140 | 0     |  | Open | ; |
| 28718               | 18637 |     | 24091 |  |      |   |
| 1.99998404261296    | 100   | 140 | 0     |  | Open | ; |
| 28719               | 20162 |     | 22543 |  |      |   |
| 1.99998416350672    | 300   | 140 | 0     |  | Open | ; |
| 28720               | 18619 |     | 18620 |  |      |   |
| 1.99998417000503    | 100   | 140 | 0     |  | Open | ; |
| 28721               | 21662 |     | 24289 |  |      |   |
| 1.99998428989812    | 250   | 140 | 0     |  | Open | ; |
| 28722               | 20135 |     | 24320 |  |      |   |
| 1.99998431282275    | 100   | 140 | 0     |  | Open | ; |
| 28723               | 18524 |     | 24226 |  |      |   |
| 1.99998433074234    | 200   | 150 | 0     |  | Open | ; |
| 28724               | 21654 |     | 21655 |  |      |   |
| 1.99998440189047    | 100   | 140 | 0     |  | Open | ; |
| 28725               | 18884 |     | 21421 |  |      |   |
| 1.99998444207599    | 160   | 150 | 0     |  | Open | ; |
| 28726               | 18642 |     | 19814 |  |      |   |
| 1.99998444444933    | 250   | 140 | 0     |  | Open | ; |
| 28727               | 20942 |     | 22416 |  |      |   |
| 1.99998448428191    | 200   | 150 | 0     |  | Open | ; |
| 28728               | 21174 |     | 21175 |  |      |   |
| 1.99998450066584    | 110   | 150 | 0     |  | Open | ; |
| 28729               | 20007 |     | 21424 |  |      |   |
| 1.99998452977486    | 160   | 150 | 0     |  | Open | ; |
| 28730               | 21961 |     | 24385 |  |      |   |
| 1.99998454232434    | 110   | 150 | 0     |  | Open | ; |
| 28731               | 21992 |     | 18815 |  |      |   |
| 1.99998356292377    | 125   | 150 | 0     |  | Open | ; |
| 28732               | 22774 |     | 22775 |  |      |   |
| 1.99998476233613    | 100   | 140 | 0     |  | Open | ; |
| 28733               | 18529 |     | 18531 |  |      |   |
| 1.99998480348971    | 250   | 150 | 0     |  | Open | ; |
| 28734               | 21532 |     | 19641 |  |      |   |
| 1.99998480247109    | 250   | 140 | 0     |  | Open | ; |
| 28735               | 22476 |     | 22420 |  |      |   |
| 1.99998481167122    | 200   | 150 | 0     |  | Open | ; |
| 28736               | 22341 |     | 22342 |  |      |   |
| 1.99998489010892    | 150   | 140 | 0     |  | Open | ; |
| 28737               | 21172 |     | 21173 |  |      |   |
| 1.9999849040128 125 |       | 150 | 0     |  | Open | ; |
| 28738               | 21666 |     | 24217 |  |      |   |
| 1.99998493182847    | 250   | 140 | 0     |  | Open | ; |
| 28739               | 20264 |     | 20265 |  |      |   |

|                     |       |     |       |      |   |
|---------------------|-------|-----|-------|------|---|
| 1.99998493380141    | 250   | 140 | 0     | Open | ; |
| 28740               | 20376 |     | 20377 |      |   |
| 1.99998499255679    | 200   | 150 | 0     | Open | ; |
| 28741               | 24102 |     | 23042 |      |   |
| 1.99998502482792    | 100   | 140 | 0     | Open | ; |
| 28742               | 20040 |     | 21932 |      |   |
| 1.99998502499815    | 160   | 150 | 0     | Open | ; |
| 28743               | 20793 |     | 20794 |      |   |
| 1.99998502503469    | 125   | 150 | 0     | Open | ; |
| 28744               | 20492 |     | 20493 |      |   |
| 1.9999850591382 160 |       | 150 | 0     | Open | ; |
| 28745               | 22819 |     | 22820 |      |   |
| 1.99998505934026    | 160   | 150 | 0     | Open | ; |
| 28746               | 22821 |     | 22822 |      |   |
| 1.99998505914569    | 160   | 150 | 0     | Open | ; |
| 28747               | 18480 |     | 18481 |      |   |
| 1.999985089871 140  |       | 150 | 0     | Open | ; |
| 28748               | 20121 |     | 24213 |      |   |
| 1.99998513961293    | 200   | 150 | 0     | Open | ; |
| 28749               | 24329 |     | 22987 |      |   |
| 1.99998416948229    | 100   | 140 | 0     | Open | ; |
| 28750               | 20831 |     | 20832 |      |   |
| 1.99998521939077    | 100   | 140 | 0     | Open | ; |
| 28751               | 24060 |     | 18465 |      |   |
| 1.99998526462629    | 110   | 150 | 0     | Open | ; |
| 28752               | 22835 |     | 19260 |      |   |
| 1.99998532517789    | 110   | 150 | 0     | Open | ; |
| 28753               | 20478 |     | 20479 |      |   |
| 1.99998539227211    | 200   | 150 | 0     | Open | ; |
| 28754               | 24053 |     | 23983 |      |   |
| 1.99998541247804    | 110   | 150 | 0     | Open | ; |
| 28755               | 20109 |     | 24536 |      |   |
| 1.99998444444933    | 200   | 150 | 0     | Open | ; |
| 28756               | 18553 |     | 20887 |      |   |
| 1.99998550424185    | 110   | 150 | 0     | Open | ; |
| 28757               | 19282 |     | 21049 |      |   |
| 1.99998557244329    | 150   | 140 | 0     | Open | ; |
| 28758               | 19570 |     | 19572 |      |   |
| 1.9999855927467 125 |       | 130 | 0     | Open | ; |
| 28759               | 18532 |     | 18533 |      |   |
| 1.99998562566544    | 250   | 140 | 0     | Open | ; |
| 28760               | 23753 |     | 24141 |      |   |
| 1.99998564531762    | 100   | 140 | 0     | Open | ; |
| 28761               | 19121 |     | 19518 |      |   |
| 1.99998565272465    | 200   | 100 | 0     | Open | ; |
| 28762               | 19413 |     | 23740 |      |   |
| 1.9999856853344 110 |       | 150 | 0     | Open | ; |
| 28763               | 18486 |     | 18487 |      |   |
| 1.99998569224686    | 100   | 140 | 0     | Open | ; |
| 28764               | 21575 |     | 21044 |      |   |

|                     |       |     |       |      |   |
|---------------------|-------|-----|-------|------|---|
| 1.99998571194197    | 110   | 150 | 0     | Open | ; |
| 28765               | 21862 |     | 22584 |      |   |
| 1.9999857447755 100 |       | 140 | 0     | Open | ; |
| 28766               | 22118 |     | 22177 |      |   |
| 1.99998480247109    | 100   | 140 | 0     | Open | ; |
| 28767               | 19281 |     | 19275 |      |   |
| 1.99998586242954    | 150   | 140 | 0     | Open | ; |
| 28768               | 23112 |     | 23689 |      |   |
| 1.99998587267414    | 125   | 150 | 0     | Open | ; |
| 28769               | 21096 |     | 19566 |      |   |
| 1.99998590303568    | 160   | 150 | 0     | Open | ; |
| 28770               | 21410 |     | 24082 |      |   |
| 1.9999859251996 150 |       | 140 | 0     | Open | ; |
| 28771               | 24140 |     | 22421 |      |   |
| 1.99998600017508    | 150   | 140 | 0     | Open | ; |
| 28772               | 23361 |     | 24259 |      |   |
| 1.99998505970671    | 125   | 140 | 0     | Open | ; |
| 28773               | 19680 |     | 19681 |      |   |
| 1.9999860804954 160 |       | 150 | 0     | Open | ; |
| 28774               | 21994 |     | 18811 |      |   |
| 1.99998608233282    | 125   | 150 | 0     | Open | ; |
| 28775               | 19007 |     | 19009 |      |   |
| 1.99998609071238    | 125   | 150 | 0     | Open | ; |
| 28776               | 18660 |     | 24090 |      |   |
| 1.99998616252348    | 250   | 140 | 0     | Open | ; |
| 28777               | 18945 |     | 18943 |      |   |
| 1.99998626182685    | 100   | 140 | 0     | Open | ; |
| 28778               | 21239 |     | 21979 |      |   |
| 1.99998626143357    | 160   | 150 | 0     | Open | ; |
| 28779               | 21243 |     | 24216 |      |   |
| 1.99998626417409    | 160   | 150 | 0     | Open | ; |
| 28780               | 20240 |     | 20241 |      |   |
| 1.999986412323 200  |       | 150 | 0     | Open | ; |
| 28781               | 20919 |     | 20920 |      |   |
| 1.99998541238255    | 140   | 150 | 0     | Open | ; |
| 28782               | 24251 |     | 24252 |      |   |
| 1.99998648483754    | 250   | 140 | 0     | Open | ; |
| 28783               | 19435 |     | 19439 |      |   |
| 1.9999855927467 140 |       | 150 | 0     | Open | ; |
| 28784               | 20096 |     | 22350 |      |   |
| 1.99998660045479    | 200   | 150 | 0     | Open | ; |
| 28785               | 19663 |     | 19664 |      |   |
| 1.99998662287317    | 110   | 150 | 0     | Open | ; |
| 28786               | 22972 |     | 23555 |      |   |
| 1.99998562566544    | 100   | 140 | 0     | Open | ; |
| 28787               | 21667 |     | 18766 |      |   |
| 1.99998664973452    | 250   | 140 | 0     | Open | ; |
| 28788               | 19682 |     | 19683 |      |   |
| 1.99998671232394    | 160   | 150 | 0     | Open | ; |
| 28789               | 19767 |     | 21876 |      |   |

|                     |       |     |       |      |   |
|---------------------|-------|-----|-------|------|---|
| 1.99998676043738    | 140   | 150 | 0     | Open | ; |
| 28790               | 22535 |     | 22536 |      |   |
| 1.99998677241271    | 250   | 150 | 0     | Open | ; |
| 28791               | 19217 |     | 19218 |      |   |
| 1.99998607980094    | 110   | 150 | 0     | Open | ; |
| 28792               | 22228 |     | 22229 |      |   |
| 1.99998724883778    | 110   | 150 | 0     | Open | ; |
| 28793               | 18894 |     | 21945 |      |   |
| 1.99998725012482    | 250   | 150 | 0     | Open | ; |
| 28794               | 21623 |     | 20810 |      |   |
| 1.9999872499535 160 |       | 150 | 0     | Open | ; |
| 28795               | 20749 |     | 22447 |      |   |
| 1.99998725012482    | 250   | 150 | 0     | Open | ; |
| 28796               | 18986 |     | 18987 |      |   |
| 1.99998741306142    | 125   | 150 | 0     | Open | ; |
| 28797               | 19066 |     | 19067 |      |   |
| 1.99998748183443    | 140   | 150 | 0     | Open | ; |
| 28798               | 22485 |     | 20321 |      |   |
| 1.99998748231214    | 160   | 150 | 0     | Open | ; |
| 28799               | 19750 |     | 19751 |      |   |
| 1.9999874827114 100 |       | 140 | 0     | Open | ; |
| 28800               | 21713 |     | 21661 |      |   |
| 1.99998751330133    | 160   | 150 | 0     | Open | ; |
| 28801               | 22510 |     | 22511 |      |   |
| 1.99998756962624    | 140   | 150 | 0     | Open | ; |
| 28802               | 20520 |     | 20521 |      |   |
| 1.99998757032879    | 110   | 150 | 0     | Open | ; |
| 28803               | 19742 |     | 22235 |      |   |
| 1.99998758292344    | 160   | 150 | 0     | Open | ; |
| 28804               | 21537 |     | 19540 |      |   |
| 1.99998761981063    | 110   | 150 | 0     | Open | ; |
| 28805               | 22094 |     | 22096 |      |   |
| 1.9999877626726 160 |       | 150 | 0     | Open | ; |
| 28806               | 23111 |     | 22143 |      |   |
| 1.99998776281628    | 125   | 150 | 0     | Open | ; |
| 28807               | 21676 |     | 22940 |      |   |
| 1.99998782256647    | 110   | 150 | 0     | Open | ; |
| 28808               | 21075 |     | 23289 |      |   |
| 1.99998788052114    | 110   | 150 | 0     | Open | ; |
| 28809               | 22072 |     | 22073 |      |   |
| 1.99998791227205    | 500   | 150 | 0     | Open | ; |
| 28810               | 24087 |     | 22862 |      |   |
| 1.99998791318334    | 110   | 150 | 0     | Open | ; |
| 28811               | 20392 |     | 20393 |      |   |
| 1.9999880250668 200 |       | 150 | 0     | Open | ; |
| 28812               | 20483 |     | 18937 |      |   |
| 1.99998809206821    | 160   | 150 | 0     | Open | ; |
| 28813               | 21725 |     | 20565 |      |   |
| 1.99998810001809    | 125   | 140 | 0     | Open | ; |
| 28814               | 20052 |     | 20053 |      |   |

|                     |       |     |       |      |   |
|---------------------|-------|-----|-------|------|---|
| 1.99998818257138    | 140   | 150 | 0     | Open | ; |
| 28815               | 22735 |     | 22091 |      |   |
| 1.9999872499535 160 |       | 150 | 0     | Open | ; |
| 28816               | 19593 |     | 19594 |      |   |
| 1.99998725012482    | 160   | 150 | 0     | Open | ; |
| 28817               | 22223 |     | 22359 |      |   |
| 1.99998724994691    | 250   | 150 | 0     | Open | ; |
| 28818               | 22221 |     | 22222 |      |   |
| 1.99998725123395    | 110   | 150 | 0     | Open | ; |
| 28819               | 21974 |     | 20588 |      |   |
| 1.99998834017696    | 110   | 150 | 0     | Open | ; |
| 28820               | 18860 |     | 23496 |      |   |
| 1.99998836277831    | 125   | 140 | 0     | Open | ; |
| 28821               | 22856 |     | 20138 |      |   |
| 1.99998842495429    | 100   | 140 | 0     | Open | ; |
| 28822               | 18741 |     | 18742 |      |   |
| 1.99998851242965    | 100   | 140 | 0     | Open | ; |
| 28823               | 21955 |     | 24137 |      |   |
| 1.99998858029711    | 140   | 150 | 0     | Open | ; |
| 28824               | 21430 |     | 18657 |      |   |
| 1.99998858254721    | 125   | 150 | 0     | Open | ; |
| 28825               | 18535 |     | 18536 |      |   |
| 1.99998858539405    | 110   | 150 | 0     | Open | ; |
| 28826               | 20238 |     | 23736 |      |   |
| 1.99998762071399    | 125   | 140 | 0     | Open | ; |
| 28827               | 22905 |     | 24249 |      |   |
| 1.99998862541466    | 100   | 140 | 0     | Open | ; |
| 28828               | 18475 |     | 22648 |      |   |
| 1.99998866252598    | 100   | 140 | 0     | Open | ; |
| 28829               | 21310 |     | 19961 |      |   |
| 1.99998869003424    | 160   | 150 | 0     | Open | ; |
| 28830               | 21178 |     | 21179 |      |   |
| 1.9999887128644 110 |       | 150 | 0     | Open | ; |
| 28831               | 23348 |     | 21915 |      |   |
| 1.99998873038339    | 110   | 150 | 0     | Open | ; |
| 28832               | 19140 |     | 22803 |      |   |
| 1.99998876516303    | 125   | 150 | 0     | Open | ; |
| 28833               | 20677 |     | 20676 |      |   |
| 1.99998889992776    | 125   | 150 | 0     | Open | ; |
| 28834               | 18871 |     | 24241 |      |   |
| 1.99998902220387    | 450   | 130 | 0     | Open | ; |
| 28835               | 22706 |     | 24051 |      |   |
| 1.9999880250668 200 |       | 150 | 0     | Open | ; |
| 28836               | 21682 |     | 20017 |      |   |
| 1.99998908959287    | 250   | 140 | 0     | Open | ; |
| 28837               | 21749 |     | 23550 |      |   |
| 1.99998810001809    | 110   | 150 | 0     | Open | ; |
| 28838               | 19802 |     | 22722 |      |   |
| 1.99998913230475    | 200   | 150 | 0     | Open | ; |
| 28839               | 22517 |     | 22677 |      |   |

|                     |       |     |       |      |   |
|---------------------|-------|-----|-------|------|---|
| 1.99998922241922    | 100   | 140 | 0     | Open | ; |
| 28840               | 22268 |     | 22269 |      |   |
| 1.99998724947471    | 140   | 150 | 0     | Open | ; |
| 28841               | 20711 |     | 20712 |      |   |
| 1.9999872490091 160 |       | 150 | 0     | Open | ; |
| 28842               | 19656 |     | 19657 |      |   |
| 1.99998725106921    | 140   | 150 | 0     | Open | ; |
| 28843               | 19658 |     | 19659 |      |   |
| 1.99998725012482    | 140   | 150 | 0     | Open | ; |
| 28844               | 23315 |     | 19986 |      |   |
| 1.99998926293696    | 125   | 150 | 0     | Open | ; |
| 28845               | 19761 |     | 20239 |      |   |
| 1.99998929981304    | 200   | 150 | 0     | Open | ; |
| 28846               | 19031 |     | 19032 |      |   |
| 1.9999893249903 200 |       | 150 | 0     | Open | ; |
| 28847               | 21863 |     | 18472 |      |   |
| 1.99998941228404    | 100   | 140 | 0     | Open | ; |
| 28848               | 23699 |     | 20190 |      |   |
| 1.99998851302432    | 150   | 140 | 0     | Open | ; |
| 28849               | 21149 |     | 19766 |      |   |
| 1.99998959226292    | 140   | 150 | 0     | Open | ; |
| 28850               | 19562 |     | 19460 |      |   |
| 1.99998964214513    | 160   | 150 | 0     | Open | ; |
| 28851               | 20893 |     | 18522 |      |   |
| 1.99998989017352    | 200   | 140 | 0     | Open | ; |
| 28852               | 20636 |     | 23879 |      |   |
| 1.99998998302354    | 150   | 140 | 0     | Open | ; |
| 28853               | 20942 |     | 20943 |      |   |
| 1.99999008552741    | 200   | 150 | 0     | Open | ; |
| 28854               | 18676 |     | 19248 |      |   |
| 1.99999009934024    | 125   | 150 | 0     | Open | ; |
| 28855               | 19667 |     | 19668 |      |   |
| 1.99999010019201    | 160   | 150 | 0     | Open | ; |
| 28856               | 19587 |     | 19588 |      |   |
| 1.99998724947471    | 110   | 150 | 0     | Open | ; |
| 28857               | 22226 |     | 22227 |      |   |
| 1.99998725012482    | 250   | 150 | 0     | Open | ; |
| 28858               | 22202 |     | 22203 |      |   |
| 1.99998725017037    | 200   | 150 | 0     | Open | ; |
| 28859               | 20394 |     | 20395 |      |   |
| 1.9999872504161 200 |       | 150 | 0     | Open | ; |
| 28860               | 23926 |     | 23901 |      |   |
| 1.99999031223115    | 150   | 140 | 0     | Open | ; |
| 28861               | 19498 |     | 22442 |      |   |
| 1.99999048505221    | 100   | 100 | 0     | Open | ; |
| 28862               | 20597 |     | 19996 |      |   |
| 1.99999049993183    | 160   | 150 | 0     | Open | ; |
| 28863               | 22575 |     | 22170 |      |   |
| 1.99999050015988    | 250   | 100 | 0     | Open | ; |
| 28864               | 21456 |     | 24275 |      |   |

|                     |       |     |       |      |   |
|---------------------|-------|-----|-------|------|---|
| 1.99999050037291    | 160   | 150 | 0     | Open | ; |
| 28865               | 23333 |     | 23336 |      |   |
| 1.9999906100792 125 |       | 140 | 0     | Open | ; |
| 28866               | 18966 |     | 18968 |      |   |
| 1.99999068534805    | 150   | 140 | 0     | Open | ; |
| 28867               | 18688 |     | 22853 |      |   |
| 1.99999074260687    | 150   | 140 | 0     | Open | ; |
| 28868               | 21961 |     | 24348 |      |   |
| 1.99999075995881    | 110   | 150 | 0     | Open | ; |
| 28869               | 18629 |     | 18630 |      |   |
| 1.99999081232574    | 100   | 140 | 0     | Open | ; |
| 28870               | 19221 |     | 19222 |      |   |
| 1.99999082213615    | 110   | 150 | 0     | Open | ; |
| 28871               | 22325 |     | 23276 |      |   |
| 1.99999086448585    | 160   | 150 | 0     | Open | ; |
| 28872               | 24817 |     | 19075 |      |   |
| 1.99999092451695    | 125   | 150 | 0     | Open | ; |
| 28873               | 22483 |     | 22761 |      |   |
| 1.99999092558202    | 400   | 130 | 0     | Open | ; |
| 28874               | 23984 |     | 24123 |      |   |
| 1.99999094518283    | 100   | 140 | 0     | Open | ; |
| 28875               | 18788 |     | 22750 |      |   |
| 1.99999096510473    | 200   | 150 | 0     | Open | ; |
| 28876               | 23616 |     | 23679 |      |   |
| 1.99999008552741    | 200   | 150 | 0     | Open | ; |
| 28877               | 18730 |     | 19876 |      |   |
| 1.99999009925676    | 200   | 150 | 0     | Open | ; |
| 28878               | 23029 |     | 24073 |      |   |
| 1.99999124214307    | 125   | 140 | 0     | Open | ; |
| 28879               | 22071 |     | 22990 |      |   |
| 1.9999872499535 200 |       | 150 | 0     | Open | ; |
| 28880               | 19601 |     | 19602 |      |   |
| 1.99998725012482    | 140   | 150 | 0     | Open | ; |
| 28881               | 22215 |     | 22216 |      |   |
| 1.9999872499535 250 |       | 150 | 0     | Open | ; |
| 28882               | 18894 |     | 18895 |      |   |
| 1.9999872504161 250 |       | 150 | 0     | Open | ; |
| 28883               | 24083 |     | 23206 |      |   |
| 1.99999126544757    | 160   | 150 | 0     | Open | ; |
| 28884               | 22133 |     | 24197 |      |   |
| 1.99999132585936    | 450   | 100 | 0     | Open | ; |
| 28885               | 22404 |     | 20206 |      |   |
| 1.999991362433 100  |       | 140 | 0     | Open | ; |
| 28886               | 19280 |     | 19278 |      |   |
| 1.99999148465741    | 150   | 140 | 0     | Open | ; |
| 28887               | 21807 |     | 21803 |      |   |
| 1.99999159183206    | 160   | 150 | 0     | Open | ; |
| 28888               | 18495 |     | 18496 |      |   |
| 1.99999169254935    | 160   | 150 | 0     | Open | ; |
| 28889               | 21030 |     | 21398 |      |   |



|                     |       |     |       |      |   |
|---------------------|-------|-----|-------|------|---|
| 1.9999917421475 125 |       | 140 | 0     | Open | ; |
| 28890               | 21532 |     | 18463 |      |   |
| 1.99999176492588    | 250   | 140 | 0     | Open | ; |
| 28891               | 23887 |     | 24086 |      |   |
| 1.99999178049389    | 200   | 140 | 0     | Open | ; |
| 28892               | 24092 |     | 24093 |      |   |
| 1.99999189249925    | 250   | 100 | 0     | Open | ; |
| 28893               | 19428 |     | 21100 |      |   |
| 1.99999190305537    | 140   | 150 | 0     | Open | ; |
| 28894               | 22525 |     | 22678 |      |   |
| 1.99999192304078    | 100   | 140 | 0     | Open | ; |
| 28895               | 22575 |     | 22576 |      |   |
| 1.99999195297761    | 250   | 100 | 0     | Open | ; |
| 28896               | 21116 |     | 21755 |      |   |
| 1.99999201210083    | 110   | 150 | 0     | Open | ; |
| 28897               | 21614 |     | 21615 |      |   |
| 1.99999202036294    | 150   | 140 | 0     | Open | ; |
| 28898               | 22765 |     | 22762 |      |   |
| 1.99999204994849    | 200   | 150 | 0     | Open | ; |
| 28899               | 20133 |     | 24257 |      |   |
| 1.99999204990619    | 150   | 140 | 0     | Open | ; |
| 28900               | 21740 |     | 24013 |      |   |
| 1.99999214127574    | 160   | 150 | 0     | Open | ; |
| 28901               | 19106 |     | 19105 |      |   |
| 1.99999214248721    | 110   | 150 | 0     | Open | ; |
| 28902               | 23335 |     | 19502 |      |   |
| 1.99999216430039    | 160   | 150 | 0     | Open | ; |
| 28903               | 19628 |     | 19629 |      |   |
| 1.99998724947471    | 200   | 150 | 0     | Open | ; |
| 28904               | 19623 |     | 19624 |      |   |
| 1.99998725012482    | 200   | 150 | 0     | Open | ; |
| 28905               | 19583 |     | 19584 |      |   |
| 1.9999872504161 200 |       | 150 | 0     | Open | ; |
| 28906               | 18800 |     | 19975 |      |   |
| 1.99999227181356    | 140   | 150 | 0     | Open | ; |
| 28907               | 19999 |     | 20580 |      |   |
| 1.99999229354865    | 110   | 150 | 0     | Open | ; |
| 28908               | 20233 |     | 24085 |      |   |
| 1.99999231289531    | 200   | 140 | 0     | Open | ; |
| 28909               | 20035 |     | 20036 |      |   |
| 1.999991362433 100  |       | 140 | 0     | Open | ; |
| 28910               | 19555 |     | 19557 |      |   |
| 1.99999236275268    | 150   | 140 | 0     | Open | ; |
| 28911               | 18935 |     | 20443 |      |   |
| 1.99999243199261    | 110   | 150 | 0     | Open | ; |
| 28912               | 18728 |     | 18729 |      |   |
| 1.99999250023218    | 125   | 150 | 0     | Open | ; |
| 28913               | 21285 |     | 24253 |      |   |
| 1.99999269012347    | 500   | 140 | 0     | Open | ; |
| 28914               | 19581 |     | 19582 |      |   |

|                     |       |     |       |      |   |
|---------------------|-------|-----|-------|------|---|
| 1.99999270310656    | 125   | 150 | 0     | Open | ; |
| 28915               | 22437 |     | 22438 |      |   |
| 1.99999270309836    | 125   | 150 | 0     | Open | ; |
| 28916               | 20451 |     | 19447 |      |   |
| 1.99999276459209    | 160   | 150 | 0     | Open | ; |
| 28917               | 19340 |     | 22566 |      |   |
| 1.99999282532572    | 125   | 140 | 0     | Open | ; |
| 28918               | 20238 |     | 18651 |      |   |
| 1.99999285169708    | 125   | 140 | 0     | Open | ; |
| 28919               | 23137 |     | 24193 |      |   |
| 1.99999312504205    | 100   | 140 | 0     | Open | ; |
| 28920               | 18573 |     | 20713 |      |   |
| 1.99999315957456    | 110   | 150 | 0     | Open | ; |
| 28921               | 23930 |     | 20110 |      |   |
| 1.99999316049986    | 100   | 140 | 0     | Open | ; |
| 28922               | 21426 |     | 23372 |      |   |
| 1.9999932231604 160 |       | 150 | 0     | Open | ; |
| 28923               | 19595 |     | 19596 |      |   |
| 1.99998724883778    | 160   | 150 | 0     | Open | ; |
| 28924               | 22376 |     | 22440 |      |   |
| 1.99999325003769    | 200   | 150 | 0     | Open | ; |
| 28925               | 20320 |     | 22330 |      |   |
| 1.9999872499535 140 |       | 150 | 0     | Open | ; |
| 28926               | 23033 |     | 24261 |      |   |
| 1.99999328186583    | 200   | 150 | 0     | Open | ; |
| 28927               | 19940 |     | 23403 |      |   |
| 1.99999328343654    | 160   | 150 | 0     | Open | ; |
| 28928               | 18691 |     | 19976 |      |   |
| 1.9999932828838 140 |       | 150 | 0     | Open | ; |
| 28929               | 24125 |     | 24191 |      |   |
| 1.99999330258117    | 140   | 150 | 0     | Open | ; |
| 28930               | 23299 |     | 23301 |      |   |
| 1.99999335146846    | 160   | 150 | 0     | Open | ; |
| 28931               | 21813 |     | 20059 |      |   |
| 1.999992362358 300  |       | 140 | 0     | Open | ; |
| 28932               | 20305 |     | 24008 |      |   |
| 1.99999342304425    | 100   | 140 | 0     | Open | ; |
| 28933               | 21847 |     | 22600 |      |   |
| 1.99999346247371    | 160   | 150 | 0     | Open | ; |
| 28934               | 18692 |     | 21422 |      |   |
| 1.99999348500877    | 125   | 150 | 0     | Open | ; |
| 28935               | 19421 |     | 21225 |      |   |
| 1.99999349233478    | 140   | 150 | 0     | Open | ; |
| 28936               | 20118 |     | 19197 |      |   |
| 1.99999357271986    | 200   | 150 | 0     | Open | ; |
| 28937               | 22326 |     | 21200 |      |   |
| 1.99999376219655    | 125   | 150 | 0     | Open | ; |
| 28938               | 22126 |     | 22129 |      |   |
| 1.9999937623717 150 |       | 140 | 0     | Open | ; |
| 28939               | 21063 |     | 19394 |      |   |

|                  |       |     |       |      |   |
|------------------|-------|-----|-------|------|---|
| 1.99999276459209 | 110   | 150 | 0     | Open | ; |
| 28940            | 19881 |     | 19882 |      |   |
| 1.99999382396601 | 125   | 100 | 0     | Open | ; |
| 28941            | 19486 |     | 23831 |      |   |
| 1.99999393287569 | 150   | 140 | 0     | Open | ; |
| 28942            | 22501 |     | 22502 |      |   |
| 1.99999396195149 | 100   | 140 | 0     | Open | ; |
| 28943            | 18840 |     | 18841 |      |   |
| 1.99999398469511 | 110   | 150 | 0     | Open | ; |
| 28944            | 23001 |     | 19721 |      |   |
| 1.99999406255773 | 100   | 140 | 0     | Open | ; |
| 28945            | 21502 |     | 21420 |      |   |
| 1.99999414529305 | 125   | 150 | 0     | Open | ; |
| 28946            | 21341 |     | 23377 |      |   |
| 1.99999416225425 | 110   | 150 | 0     | Open | ; |
| 28947            | 22387 |     | 22734 |      |   |
| 1.99998724947471 | 200   | 150 | 0     | Open | ; |
| 28948            | 24161 |     | 18809 |      |   |
| 1.99999424996634 | 160   | 150 | 0     | Open | ; |
| 28949            | 22219 |     | 22220 |      |   |
| 1.99998724994691 | 110   | 150 | 0     | Open | ; |
| 28950            | 18690 |     | 21567 |      |   |
| 1.99999328184643 | 140   | 150 | 0     | Open | ; |
| 28951            | 18890 |     | 19732 |      |   |
| 1.99999328300376 | 100   | 140 | 0     | Open | ; |
| 28952            | 18730 |     | 18731 |      |   |
| 1.99999433271234 | 200   | 150 | 0     | Open | ; |
| 28953            | 18639 |     | 19642 |      |   |
| 1.99999437018087 | 100   | 140 | 0     | Open | ; |
| 28954            | 21758 |     | 19797 |      |   |
| 1.99999439981404 | 110   | 150 | 0     | Open | ; |
| 28955            | 19711 |     | 20716 |      |   |
| 1.99999349233478 | 300   | 140 | 0     | Open | ; |
| 28956            | 22671 |     | 22672 |      |   |
| 1.9999945641555  | 200   | 150 | 0     | Open | ; |
| 28957            | 19189 |     | 19335 |      |   |
| 1.99999458029154 | 200   | 150 | 0     | Open | ; |
| 28958            | 21319 |     | 20731 |      |   |
| 1.99999459264938 | 150   | 140 | 0     | Open | ; |
| 28959            | 19555 |     | 19556 |      |   |
| 1.999994610471   | 150   | 140 | 0     | Open | ; |
| 28960            | 20576 |     | 20149 |      |   |
| 1.99999461180715 | 160   | 150 | 0     | Open | ; |
| 28961            | 19022 |     | 22756 |      |   |
| 1.99999461284871 | 125   | 150 | 0     | Open | ; |
| 28962            | 23881 |     | 23882 |      |   |
| 1.99999461269629 | 160   | 150 | 0     | Open | ; |
| 28963            | 19935 |     | 20278 |      |   |
| 1.99999472482599 | 110   | 150 | 0     | Open | ; |
| 28964            | 22846 |     | 22847 |      |   |

|                     |       |     |       |      |   |
|---------------------|-------|-----|-------|------|---|
| 1.99999482020835    | 140   | 150 | 0     | Open | ; |
| 28965               | 21860 |     | 24334 |      |   |
| 1.99999382495053    | 160   | 150 | 0     | Open | ; |
| 28966               | 22799 |     | 21468 |      |   |
| 1.99999492450659    | 100   | 140 | 0     | Open | ; |
| 28967               | 21097 |     | 21469 |      |   |
| 1.99999492476059    | 160   | 150 | 0     | Open | ; |
| 28968               | 22635 |     | 22760 |      |   |
| 1.99999502213092    | 250   | 150 | 0     | Open | ; |
| 28969               | 20033 |     | 20399 |      |   |
| 1.99999502192719    | 150   | 140 | 0     | Open | ; |
| 28970               | 19544 |     | 21336 |      |   |
| 1.99999520022479    | 160   | 150 | 0     | Open | ; |
| 28971               | 19585 |     | 19586 |      |   |
| 1.99998724947471    | 110   | 150 | 0     | Open | ; |
| 28972               | 19630 |     | 19631 |      |   |
| 1.99998725106921    | 200   | 150 | 0     | Open | ; |
| 28973               | 21038 |     | 22042 |      |   |
| 1.99999531220288    | 200   | 150 | 0     | Open | ; |
| 28974               | 22955 |     | 23722 |      |   |
| 1.99999543200128    | 110   | 150 | 0     | Open | ; |
| 28975               | 19900 |     | 21536 |      |   |
| 1.99999543204916    | 140   | 150 | 0     | Open | ; |
| 28976               | 18972 |     | 18974 |      |   |
| 1.99999543216833    | 150   | 140 | 0     | Open | ; |
| 28977               | 21192 |     | 21198 |      |   |
| 1.99999543331189    | 100   | 140 | 0     | Open | ; |
| 28978               | 19997 |     | 20254 |      |   |
| 1.99999549184695    | 300   | 140 | 0     | Open | ; |
| 28979               | 19187 |     | 22978 |      |   |
| 1.99999349233478    | 200   | 150 | 0     | Open | ; |
| 28980               | 21566 |     | 20598 |      |   |
| 1.99999562462965    | 160   | 150 | 0     | Open | ; |
| 28981               | 22279 |     | 22280 |      |   |
| 1.99999568201327    | 200   | 150 | 0     | Open | ; |
| 28982               | 19558 |     | 19559 |      |   |
| 1.99999568281451    | 250   | 100 | 0     | Open | ; |
| 28983               | 21463 |     | 20016 |      |   |
| 1.9999958620886 100 |       | 140 | 0     | Open | ; |
| 28984               | 21051 |     | 22662 |      |   |
| 1.99999588311499    | 150   | 140 | 0     | Open | ; |
| 28985               | 21350 |     | 22092 |      |   |
| 1.99999594430789    | 125   | 150 | 0     | Open | ; |
| 28986               | 21479 |     | 24305 |      |   |
| 1.99999595274372    | 110   | 150 | 0     | Open | ; |
| 28987               | 22809 |     | 23440 |      |   |
| 1.99999596451935    | 150   | 140 | 0     | Open | ; |
| 28988               | 20211 |     | 24314 |      |   |
| 1.99999596571222    | 200   | 140 | 0     | Open | ; |
| 28989               | 19301 |     | 21776 |      |   |

|                     |       |     |       |      |   |
|---------------------|-------|-----|-------|------|---|
| 1.99999613110032    | 110   | 150 | 0     | Open | ; |
| 28990               | 22013 |     | 19873 |      |   |
| 1.99999613253027    | 125   | 150 | 0     | Open | ; |
| 28991               | 23310 |     | 24196 |      |   |
| 1.99999613222455    | 125   | 150 | 0     | Open | ; |
| 28992               | 23867 |     | 23049 |      |   |
| 1.99999614269706    | 110   | 150 | 0     | Open | ; |
| 28993               | 20319 |     | 20440 |      |   |
| 1.9999872499535 140 |       | 150 | 0     | Open | ; |
| 28994               | 18931 |     | 20937 |      |   |
| 1.99998724994691    | 200   | 150 | 0     | Open | ; |
| 28995               | 22628 |     | 24004 |      |   |
| 1.99999631207855    | 160   | 150 | 0     | Open | ; |
| 28996               | 21384 |     | 21025 |      |   |
| 1.9999963124589 160 |       | 150 | 0     | Open | ; |
| 28997               | 24671 |     | 23796 |      |   |
| 1.99999631311582    | 160   | 150 | 0     | Open | ; |
| 28998               | 21413 |     | 24378 |      |   |
| 1.99999642574015    | 150   | 140 | 0     | Open | ; |
| 28999               | 21826 |     | 22321 |      |   |
| 1.9999965452555 200 |       | 150 | 0     | Open | ; |
| 29000               | 21703 |     | 22007 |      |   |
| 1.99999657272415    | 140   | 150 | 0     | Open | ; |
| 29001               | 19653 |     | 21493 |      |   |
| 1.99999661113669    | 100   | 140 | 0     | Open | ; |
| 29002               | 18663 |     | 18732 |      |   |
| 1.9999966932727 200 |       | 140 | 0     | Open | ; |
| 29003               | 20383 |     | 20384 |      |   |
| 1.99999673211622    | 200   | 140 | 0     | Open | ; |
| 29004               | 22845 |     | 22728 |      |   |
| 1.99999673980708    | 250   | 150 | 0     | Open | ; |
| 29005               | 19363 |     | 21145 |      |   |
| 1.99999682167519    | 150   | 140 | 0     | Open | ; |
| 29006               | 23452 |     | 24062 |      |   |
| 1.99999690511082    | 160   | 150 | 0     | Open | ; |
| 29007               | 22814 |     | 22370 |      |   |
| 1.99999698482688    | 160   | 150 | 0     | Open | ; |
| 29008               | 20490 |     | 20491 |      |   |
| 1.99999698527238    | 110   | 150 | 0     | Open | ; |
| 29009               | 18980 |     | 18981 |      |   |
| 1.99999706542295    | 110   | 150 | 0     | Open | ; |
| 29010               | 23638 |     | 20531 |      |   |
| 1.99999613222455    | 125   | 150 | 0     | Open | ; |
| 29011               | 22217 |     | 22218 |      |   |
| 1.99998725106921    | 250   | 150 | 0     | Open | ; |
| 29012               | 22238 |     | 19489 |      |   |
| 1.9999973253068 110 |       | 150 | 0     | Open | ; |
| 29013               | 20430 |     | 21563 |      |   |
| 1.9999973450407 125 |       | 140 | 0     | Open | ; |
| 29014               | 20727 |     | 20728 |      |   |

|                  |       |     |       |      |   |
|------------------|-------|-----|-------|------|---|
| 1.99999735285613 | 125   | 150 | 0     | Open | ; |
| 29015            | 20482 |     | 18939 |      |   |
| 1.99999736237623 | 110   | 150 | 0     | Open | ; |
| 29016            | 20788 |     | 20789 |      |   |
| 1.99999740283366 | 110   | 150 | 0     | Open | ; |
| 29017            | 18877 |     | 24139 |      |   |
| 1.99999740294294 | 140   | 150 | 0     | Open | ; |
| 29018            | 19363 |     | 21408 |      |   |
| 1.99999750605763 | 150   | 140 | 0     | Open | ; |
| 29019            | 20257 |     | 19258 |      |   |
| 1.99999661113669 | 125   | 150 | 0     | Open | ; |
| 29020            | 24182 |     | 24183 |      |   |
| 1.99999766190909 | 110   | 150 | 0     | Open | ; |
| 29021            | 22380 |     | 23288 |      |   |
| 1.99999766304258 | 160   | 150 | 0     | Open | ; |
| 29022            | 19990 |     | 20385 |      |   |
| 1.99999767256978 | 200   | 100 | 0     | Open | ; |
| 29023            | 20506 |     | 20507 |      |   |
| 1.99999767275649 | 350   | 130 | 0     | Open | ; |
| 29024            | 21556 |     | 19904 |      |   |
| 1.99999767325498 | 160   | 150 | 0     | Open | ; |
| 29025            | 19001 |     | 19002 |      |   |
| 1.99999771222063 | 110   | 150 | 0     | Open | ; |
| 29026            | 19024 |     | 19025 |      |   |
| 1.99999771329248 | 110   | 150 | 0     | Open | ; |
| 29027            | 21737 |     | 22251 |      |   |
| 1.99999774249782 | 110   | 150 | 0     | Open | ; |
| 29028            | 19227 |     | 19755 |      |   |
| 1.99999777208484 | 110   | 150 | 0     | Open | ; |
| 29029            | 21153 |     | 21155 |      |   |
| 1.99999777209513 | 160   | 150 | 0     | Open | ; |
| 29030            | 20264 |     | 20714 |      |   |
| 1.99999782396772 | 250   | 140 | 0     | Open | ; |
| 29031            | 20212 |     | 24315 |      |   |
| 1.99999784264152 | 200   | 140 | 0     | Open | ; |
| 29032            | 23668 |     | 23946 |      |   |
| 1.99999784363543 | 110   | 150 | 0     | Open | ; |
| 29033            | 20031 |     | 20032 |      |   |
| 1.99999795993525 | 100   | 140 | 0     | Open | ; |
| 29034            | 19407 |     | 22922 |      |   |
| 1.99999801275362 | 100   | 140 | 0     | Open | ; |
| 29035            | 22174 |     | 20496 |      |   |
| 1.99999804244262 | 200   | 130 | 0     | Open | ; |
| 29036            | 18984 |     | 18985 |      |   |
| 1.99999811260888 | 110   | 150 | 0     | Open | ; |
| 29037            | 23657 |     | 22949 |      |   |
| 1.99999613334878 | 110   | 150 | 0     | Open | ; |
| 29038            | 20089 |     | 22564 |      |   |
| 1.99999816169767 | 150   | 140 | 0     | Open | ; |
| 29039            | 20885 |     | 22033 |      |   |

|                     |       |     |       |      |   |
|---------------------|-------|-----|-------|------|---|
| 1.99999816145849    | 200   | 150 | 0     | Open | ; |
| 29040               | 19077 |     | 20595 |      |   |
| 1.99999816962668    | 125   | 150 | 0     | Open | ; |
| 29041               | 21016 |     | 22151 |      |   |
| 1.99999824499333    | 160   | 150 | 0     | Open | ; |
| 29042               | 22641 |     | 22642 |      |   |
| 1.9999872499535 160 |       | 150 | 0     | Open | ; |
| 29043               | 18882 |     | 21235 |      |   |
| 1.99999826032675    | 140   | 150 | 0     | Open | ; |
| 29044               | 23069 |     | 20140 |      |   |
| 1.99999829274043    | 150   | 140 | 0     | Open | ; |
| 29045               | 18777 |     | 21026 |      |   |
| 1.99999833014595    | 160   | 150 | 0     | Open | ; |
| 29046               | 20459 |     | 20685 |      |   |
| 1.99999833041056    | 100   | 140 | 0     | Open | ; |
| 29047               | 19018 |     | 19019 |      |   |
| 1.99999834504768    | 250   | 140 | 0     | Open | ; |
| 29048               | 20227 |     | 23007 |      |   |
| 1.99999834482347    | 125   | 140 | 0     | Open | ; |
| 29049               | 18664 |     | 19567 |      |   |
| 1.99999837257697    | 200   | 140 | 0     | Open | ; |
| 29050               | 18724 |     | 18725 |      |   |
| 1.99999840993148    | 110   | 150 | 0     | Open | ; |
| 29051               | 20522 |     | 20523 |      |   |
| 1.99999841230732    | 110   | 150 | 0     | Open | ; |
| 29052               | 19562 |     | 19563 |      |   |
| 1.99999842530226    | 160   | 150 | 0     | Open | ; |
| 29053               | 18882 |     | 21098 |      |   |
| 1.99999842481451    | 140   | 150 | 0     | Open | ; |
| 29054               | 18982 |     | 18983 |      |   |
| 1.99999846296416    | 110   | 150 | 0     | Open | ; |
| 29055               | 20594 |     | 18758 |      |   |
| 1.99999847275247    | 110   | 150 | 0     | Open | ; |
| 29056               | 22657 |     | 22658 |      |   |
| 1.99999850263896    | 110   | 150 | 0     | Open | ; |
| 29057               | 19254 |     | 19247 |      |   |
| 1.99999857020174    | 160   | 150 | 0     | Open | ; |
| 29058               | 21598 |     | 22489 |      |   |
| 1.99999857024151    | 160   | 150 | 0     | Open | ; |
| 29059               | 18739 |     | 18740 |      |   |
| 1.99999858499893    | 140   | 150 | 0     | Open | ; |
| 29060               | 22275 |     | 20845 |      |   |
| 1.99999866304657    | 100   | 140 | 0     | Open | ; |
| 29061               | 23738 |     | 23291 |      |   |
| 1.99999766304258    | 110   | 150 | 0     | Open | ; |
| 29062               | 18525 |     | 18526 |      |   |
| 1.9999987621502 160 |       | 150 | 0     | Open | ; |
| 29063               | 19046 |     | 19047 |      |   |
| 1.99999876347395    | 100   | 140 | 0     | Open | ; |
| 29064               | 21380 |     | 20261 |      |   |

|                     |       |     |       |      |   |
|---------------------|-------|-----|-------|------|---|
| 1.99999879967267    | 300   | 140 | 0     | Open | ; |
| 29065               | 20448 |     | 20449 |      |   |
| 1.99999784264152    | 160   | 150 | 0     | Open | ; |
| 29066               | 21735 |     | 19772 |      |   |
| 1.99999886483221    | 100   | 140 | 0     | Open | ; |
| 29067               | 22863 |     | 24131 |      |   |
| 1.99999904184504    | 200   | 140 | 0     | Open | ; |
| 29068               | 20821 |     | 20823 |      |   |
| 1.99999906392637    | 450   | 140 | 0     | Open | ; |
| 29069               | 23621 |     | 23775 |      |   |
| 1.99999613222455    | 110   | 150 | 0     | Open | ; |
| 29070               | 24461 |     | 19809 |      |   |
| 1.99999816962668    | 100   | 140 | 0     | Open | ; |
| 29071               | 22087 |     | 22208 |      |   |
| 1.9999872499535 160 |       | 150 | 0     | Open | ; |
| 29072               | 21829 |     | 19753 |      |   |
| 1.99999826033136    | 100   | 140 | 0     | Open | ; |
| 29073               | 18509 |     | 18510 |      |   |
| 1.99999926453509    | 160   | 150 | 0     | Open | ; |
| 29074               | 18919 |     | 20513 |      |   |
| 1.99999829241729    | 300   | 140 | 0     | Open | ; |
| 29075               | 20468 |     | 20469 |      |   |
| 1.99999931314692    | 160   | 150 | 0     | Open | ; |
| 29076               | 21167 |     | 21188 |      |   |
| 1.9999993419712 110 |       | 150 | 0     | Open | ; |
| 29077               | 19036 |     | 19037 |      |   |
| 1.9999993727209 110 |       | 150 | 0     | Open | ; |
| 29078               | 19300 |     | 24179 |      |   |
| 1.9999984123299 160 |       | 150 | 0     | Open | ; |
| 29079               | 20934 |     | 20935 |      |   |
| 1.99999945865924    | 125   | 150 | 0     | Open | ; |
| 29080               | 19973 |     | 22125 |      |   |
| 1.99999951327871    | 150   | 140 | 0     | Open | ; |
| 29081               | 21278 |     | 21437 |      |   |
| 1.99999951303915    | 125   | 140 | 0     | Open | ; |
| 29082               | 21130 |     | 19445 |      |   |
| 1.99999955220134    | 100   | 140 | 0     | Open | ; |
| 29083               | 21810 |     | 22749 |      |   |
| 1.99999955319228    | 250   | 100 | 0     | Open | ; |
| 29084               | 21695 |     | 21143 |      |   |
| 1.99999964917617    | 140   | 150 | 0     | Open | ; |
| 29085               | 22197 |     | 22198 |      |   |
| 1.99999964992716    | 140   | 150 | 0     | Open | ; |
| 29086               | 19537 |     | 19539 |      |   |
| 1.99999972477184    | 125   | 140 | 0     | Open | ; |
| 29087               | 24362 |     | 24363 |      |   |
| 1.99999973299981    | 110   | 150 | 0     | Open | ; |
| 29088               | 20847 |     | 22273 |      |   |
| 1.99999974481538    | 100   | 140 | 0     | Open | ; |
| 29089               | 21056 |     | 19131 |      |   |



|                     |       |     |       |      |   |
|---------------------|-------|-----|-------|------|---|
| 1.99999983293663    | 140   | 150 | 0     | Open | ; |
| 29090               | 18700 |     | 18519 |      |   |
| 1.9999996984743     | 110   | 150 | 0     | Open | ; |
| 29091               | 24074 |     | 23828 |      |   |
| 2.00000005193399    | 125   | 140 | 0     | Open | ; |
| 29092               | 20725 |     | 20726 |      |   |
| 2.00000006175479    | 110   | 150 | 0     | Open | ; |
| 29093               | 18581 |     | 19542 |      |   |
| 2.00000009000884    | 160   | 150 | 0     | Open | ; |
| 29094               | 22818 |     | 20163 |      |   |
| 2.00000011220925    | 140   | 150 | 0     | Open | ; |
| 29095               | 19050 |     | 19051 |      |   |
| 2.00000011236389    | 125   | 140 | 0     | Open | ; |
| 29096               | 20107 |     | 23106 |      |   |
| 1.99999613334878    | 125   | 150 | 0     | Open | ; |
| 29097               | 22036 |     | 24545 |      |   |
| 2.00000015937005    | 160   | 150 | 0     | Open | ; |
| 29098               | 19784 |     | 19870 |      |   |
| 2.00000015937042    | 110   | 150 | 0     | Open | ; |
| 29099               | 18491 |     | 18492 |      |   |
| 2.00000020234317    | 160   | 150 | 0     | Open | ; |
| 29100               | 19597 |     | 19598 |      |   |
| 1.9999872499535 160 |       | 150 | 0     | Open | ; |
| 29101               | 19745 |     | 22457 |      |   |
| 1.99999825920555    | 100   | 140 | 0     | Open | ; |
| 29102               | 20252 |     | 20253 |      |   |
| 2.00000034078272    | 100   | 140 | 0     | Open | ; |
| 29103               | 24201 |     | 24281 |      |   |
| 2.00000042300604    | 125   | 150 | 0     | Open | ; |
| 29104               | 20913 |     | 20758 |      |   |
| 2.0000004617875 500 |       | 130 | 0     | Open | ; |
| 29105               | 21435 |     | 23648 |      |   |
| 1.99999951307444    | 125   | 140 | 0     | Open | ; |
| 29106               | 23921 |     | 24162 |      |   |
| 2.00000052504735    | 100   | 140 | 0     | Open | ; |
| 29107               | 19645 |     | 19170 |      |   |
| 2.00000052509159    | 100   | 140 | 0     | Open | ; |
| 29108               | 21720 |     | 20275 |      |   |
| 2.00000052997364    | 125   | 140 | 0     | Open | ; |
| 29109               | 20021 |     | 20910 |      |   |
| 2.00000056186964    | 250   | 140 | 0     | Open | ; |
| 29110               | 23477 |     | 24100 |      |   |
| 2.00000062449899    | 160   | 150 | 0     | Open | ; |
| 29111               | 23494 |     | 23852 |      |   |
| 2.00000062454691    | 125   | 150 | 0     | Open | ; |
| 29112               | 18865 |     | 24278 |      |   |
| 2.00000064050568    | 100   | 140 | 0     | Open | ; |
| 29113               | 18641 |     | 23725 |      |   |
| 2.00000064244466    | 250   | 140 | 0     | Open | ; |
| 29114               | 22059 |     | 20896 |      |   |

|                     |       |     |       |      |   |
|---------------------|-------|-----|-------|------|---|
| 1.99999965009265    | 100   | 140 | 0     | Open | ; |
| 29115               | 23282 |     | 19963 |      |   |
| 2.00000072335526    | 125   | 150 | 0     | Open | ; |
| 29116               | 21652 |     | 21653 |      |   |
| 2.00000076425806    | 140   | 150 | 0     | Open | ; |
| 29117               | 23387 |     | 23388 |      |   |
| 2.00000077189179    | 150   | 140 | 0     | Open | ; |
| 29118               | 21656 |     | 21657 |      |   |
| 2.00000082540234    | 110   | 150 | 0     | Open | ; |
| 29119               | 21028 |     | 19387 |      |   |
| 2.00000084482089    | 100   | 140 | 0     | Open | ; |
| 29120               | 19343 |     | 23599 |      |   |
| 2.0000008449287 100 |       | 140 | 0     | Open | ; |
| 29121               | 20242 |     | 20244 |      |   |
| 2.00000085124138    | 125   | 150 | 0     | Open | ; |
| 29122               | 20898 |     | 23786 |      |   |
| 2.00000088370527    | 250   | 140 | 0     | Open | ; |
| 29123               | 20380 |     | 20381 |      |   |
| 2.0000008859561 100 |       | 140 | 0     | Open | ; |
| 29124               | 20921 |     | 20663 |      |   |
| 2.00000090315479    | 140   | 150 | 0     | Open | ; |
| 29125               | 22056 |     | 22352 |      |   |
| 2.00000098310654    | 200   | 150 | 0     | Open | ; |
| 29126               | 20516 |     | 20517 |      |   |
| 2.00000100514595    | 250   | 140 | 0     | Open | ; |
| 29127               | 23014 |     | 19100 |      |   |
| 2.000001042531 110  |       | 150 | 0     | Open | ; |
| 29128               | 18934 |     | 20357 |      |   |
| 2.00000104452438    | 110   | 150 | 0     | Open | ; |
| 29129               | 19314 |     | 24166 |      |   |
| 2.00000105999723    | 200   | 150 | 0     | Open | ; |
| 29130               | 22193 |     | 22194 |      |   |
| 2.60057062021853    | 200   | 140 | 0     | Open | ; |
| 29131               | 23256 |     | 24058 |      |   |
| 2.00000009000884    | 100   | 140 | 0     | Open | ; |
| 29132               | 22967 |     | 22947 |      |   |
| 1.99999613222953    | 110   | 150 | 0     | Open | ; |
| 29133               | 22587 |     | 22588 |      |   |
| 2.00000016050589    | 110   | 150 | 0     | Open | ; |
| 29134               | 19634 |     | 19635 |      |   |
| 1.99998725020524    | 200   | 150 | 0     | Open | ; |
| 29135               | 19436 |     | 21217 |      |   |
| 2.00000131221755    | 140   | 150 | 0     | Open | ; |
| 29136               | 23134 |     | 22020 |      |   |
| 2.00000156220274    | 150   | 140 | 0     | Open | ; |
| 29137               | 22510 |     | 22512 |      |   |
| 2.00000159232849    | 140   | 150 | 0     | Open | ; |
| 29138               | 20848 |     | 21132 |      |   |
| 2.0000015931534 100 |       | 140 | 0     | Open | ; |
| 29139               | 18659 |     | 22446 |      |   |

|                     |       |     |       |      |   |
|---------------------|-------|-----|-------|------|---|
| 2.00000063937018    | 250   | 140 | 0     | Open | ; |
| 29140               | 24356 |     | 24357 |      |   |
| 2.00000166479317    | 160   | 150 | 0     | Open | ; |
| 29141               | 23435 |     | 22720 |      |   |
| 2.00000176363925    | 110   | 150 | 0     | Open | ; |
| 29142               | 21335 |     | 19545 |      |   |
| 2.00000178025865    | 125   | 150 | 0     | Open | ; |
| 29143               | 21577 |     | 20911 |      |   |
| 2.00000182247241    | 250   | 140 | 0     | Open | ; |
| 29144               | 21112 |     | 23609 |      |   |
| 2.00000192433162    | 110   | 150 | 0     | Open | ; |
| 29145               | 23558 |     | 23526 |      |   |
| 2.00000098311165    | 100   | 140 | 0     | Open | ; |
| 29146               | 19712 |     | 20717 |      |   |
| 2.00000198295629    | 300   | 140 | 0     | Open | ; |
| 29147               | 21631 |     | 21632 |      |   |
| 2.00000009000918    | 125   | 150 | 0     | Open | ; |
| 29148               | 23982 |     | 23103 |      |   |
| 1.99999613222455    | 125   | 150 | 0     | Open | ; |
| 29149               | 24221 |     | 20145 |      |   |
| 2.00000219232108    | 125   | 140 | 0     | Open | ; |
| 29150               | 23669 |     | 24295 |      |   |
| 2.0000022123801 100 |       | 140 | 0     | Open | ; |
| 29151               | 18614 |     | 19636 |      |   |
| 2.00000224251854    | 125   | 150 | 0     | Open | ; |
| 29152               | 24242 |     | 22991 |      |   |
| 1.99998724994691    | 200   | 150 | 0     | Open | ; |
| 29153               | 21804 |     | 23230 |      |   |
| 2.00000228510146    | 125   | 150 | 0     | Open | ; |
| 29154               | 20177 |     | 20918 |      |   |
| 2.00000235308201    | 160   | 150 | 0     | Open | ; |
| 29155               | 18682 |     | 18843 |      |   |
| 2.00000237256456    | 100   | 140 | 0     | Open | ; |
| 29156               | 22097 |     | 22095 |      |   |
| 2.00000242470871    | 125   | 150 | 0     | Open | ; |
| 29157               | 24125 |     | 19112 |      |   |
| 2.0000024627057 140 |       | 150 | 0     | Open | ; |
| 29158               | 21588 |     | 21585 |      |   |
| 2.00000251218774    | 110   | 150 | 0     | Open | ; |
| 29159               | 24263 |     | 23238 |      |   |
| 2.00000272250636    | 110   | 150 | 0     | Open | ; |
| 29160               | 21148 |     | 21211 |      |   |
| 2.00000273020803    | 110   | 150 | 0     | Open | ; |
| 29161               | 23051 |     | 20106 |      |   |
| 2.00000276062805    | 110   | 150 | 0     | Open | ; |
| 29162               | 22773 |     | 19992 |      |   |
| 2.00000279257219    | 125   | 140 | 0     | Open | ; |
| 29163               | 19007 |     | 19008 |      |   |
| 2.00000281149275    | 125   | 150 | 0     | Open | ; |
| 29164               | 24349 |     | 21283 |      |   |

|                     |       |     |       |  |      |   |
|---------------------|-------|-----|-------|--|------|---|
| 2.00000281281142    | 200   | 150 | 0     |  | Open | ; |
| 29165               | 21581 |     | 21583 |  |      |   |
| 2.000001823005 160  |       | 150 | 0     |  | Open | ; |
| 29166               | 20258 |     | 20259 |  |      |   |
| 2.00000306250433    | 125   | 150 | 0     |  | Open | ; |
| 29167               | 19421 |     | 19425 |  |      |   |
| 2.00000306310998    | 140   | 150 | 0     |  | Open | ; |
| 29168               | 18966 |     | 18967 |  |      |   |
| 2.00000009000884    | 150   | 140 | 0     |  | Open | ; |
| 29169               | 22652 |     | 21558 |  |      |   |
| 1.99999613335376    | 250   | 140 | 0     |  | Open | ; |
| 29170               | 24354 |     | 22110 |  |      |   |
| 2.00000322482835    | 160   | 150 | 0     |  | Open | ; |
| 29171               | 18892 |     | 18893 |  |      |   |
| 1.9999872499535 140 |       | 150 | 0     |  | Open | ; |
| 29172               | 20795 |     | 20796 |  |      |   |
| 2.00000326530799    | 110   | 150 | 0     |  | Open | ; |
| 29173               | 23048 |     | 23804 |  |      |   |
| 2.00000330032888    | 100   | 140 | 0     |  | Open | ; |
| 29174               | 24180 |     | 22924 |  |      |   |
| 2.00000330269825    | 150   | 140 | 0     |  | Open | ; |
| 29175               | 19512 |     | 22666 |  |      |   |
| 2.00000332489434    | 100   | 140 | 0     |  | Open | ; |
| 29176               | 23998 |     | 24050 |  |      |   |
| 2.00000333300923    | 125   | 150 | 0     |  | Open | ; |
| 29177               | 22838 |     | 22839 |  |      |   |
| 2.00000334252564    | 150   | 140 | 0     |  | Open | ; |
| 29178               | 23662 |     | 21568 |  |      |   |
| 2.00000235308201    | 140   | 150 | 0     |  | Open | ; |
| 29179               | 24335 |     | 24336 |  |      |   |
| 2.95813383077072    | 315   | 150 | 0     |  | Open | ; |
| 29180               | 23354 |     | 24368 |  |      |   |
| 2.00000338568537    | 100   | 140 | 0     |  | Open | ; |
| 29181               | 21739 |     | 24011 |  |      |   |
| 2.00000246313931    | 160   | 150 | 0     |  | Open | ; |
| 29182               | 21456 |     | 24153 |  |      |   |
| 2.00000362352356    | 160   | 150 | 0     |  | Open | ; |
| 29183               | 19022 |     | 19023 |  |      |   |
| 2.00000362553737    | 125   | 150 | 0     |  | Open | ; |
| 29184               | 18746 |     | 18747 |  |      |   |
| 2.00000362595765    | 160   | 150 | 0     |  | Open | ; |
| 29185               | 23589 |     | 23285 |  |      |   |
| 2.00000374539821    | 250   | 100 | 0     |  | Open | ; |
| 29186               | 24600 |     | 24601 |  |      |   |
| 2.00000380247285    | 250   | 140 | 0     |  | Open | ; |
| 29187               | 24243 |     | 20670 |  |      |   |
| 2.00000281281142    | 100   | 140 | 0     |  | Open | ; |
| 29188               | 19935 |     | 19806 |  |      |   |
| 2.00000385048371    | 110   | 150 | 0     |  | Open | ; |
| 29189               | 20510 |     | 20232 |  |      |   |

|                     |       |     |       |  |      |   |
|---------------------|-------|-----|-------|--|------|---|
| 2.00000388001468    | 110   | 150 | 0     |  | Open | ; |
| 29190               | 22452 |     | 22500 |  |      |   |
| 2.0000039409086 160 |       | 150 | 0     |  | Open | ; |
| 29191               | 23078 |     | 23801 |  |      |   |
| 2.00000394109386    | 110   | 150 | 0     |  | Open | ; |
| 29192               | 18808 |     | 24361 |  |      |   |
| 2.00000404194157    | 125   | 150 | 0     |  | Open | ; |
| 29193               | 19066 |     | 21698 |  |      |   |
| 2.00000407215521    | 140   | 150 | 0     |  | Open | ; |
| 29194               | 21581 |     | 21582 |  |      |   |
| 2.0000000893702 160 |       | 150 | 0     |  | Open | ; |
| 29195               | 20108 |     | 22016 |  |      |   |
| 1.99999613222455    | 125   | 150 | 0     |  | Open | ; |
| 29196               | 21792 |     | 23062 |  |      |   |
| 2.00000424435087    | 110   | 150 | 0     |  | Open | ; |
| 29197               | 22919 |     | 24271 |  |      |   |
| 2.00000424629181    | 200   | 140 | 0     |  | Open | ; |
| 29198               | 20742 |     | 23924 |  |      |   |
| 2.00000426029852    | 500   | 130 | 0     |  | Open | ; |
| 29199               | 20118 |     | 22035 |  |      |   |
| 2.00000425994239    | 200   | 150 | 0     |  | Open | ; |
| 29200               | 23671 |     | 24155 |  |      |   |
| 2.00000428882246    | 150   | 140 | 0     |  | Open | ; |
| 29201               | 21720 |     | 20405 |  |      |   |
| 2.00000433016402    | 125   | 140 | 0     |  | Open | ; |
| 29202               | 19033 |     | 19035 |  |      |   |
| 2.00000433246297    | 125   | 140 | 0     |  | Open | ; |
| 29203               | 24059 |     | 23353 |  |      |   |
| 2.00000441049954    | 125   | 150 | 0     |  | Open | ; |
| 29204               | 22572 |     | 22574 |  |      |   |
| 2.00000452466238    | 110   | 150 | 0     |  | Open | ; |
| 29205               | 19560 |     | 19561 |  |      |   |
| 2.00000462426782    | 150   | 140 | 0     |  | Open | ; |
| 29206               | 21251 |     | 22319 |  |      |   |
| 2.00000464506108    | 160   | 150 | 0     |  | Open | ; |
| 29207               | 24161 |     | 23750 |  |      |   |
| 2.00000468237189    | 160   | 150 | 0     |  | Open | ; |
| 29208               | 21256 |     | 19344 |  |      |   |
| 2.000004784789 110  |       | 150 | 0     |  | Open | ; |
| 29209               | 20374 |     | 20375 |  |      |   |
| 2.0000048626354 140 |       | 150 | 0     |  | Open | ; |
| 29210               | 23739 |     | 23741 |  |      |   |
| 2.00000494534525    | 110   | 150 | 0     |  | Open | ; |
| 29211               | 21128 |     | 24021 |  |      |   |
| 2.00000501114861    | 100   | 140 | 0     |  | Open | ; |
| 29212               | 22005 |     | 22006 |  |      |   |
| 2.00000009000884    | 100   | 140 | 0     |  | Open | ; |
| 29213               | 24538 |     | 23606 |  |      |   |
| 2.00000516944243    | 110   | 150 | 0     |  | Open | ; |
| 29214               | 18748 |     | 20528 |  |      |   |

|                     |       |     |       |      |   |
|---------------------|-------|-----|-------|------|---|
| 2.00000516972152    | 250   | 100 | 0     | Open | ; |
| 29215               | 24096 |     | 24098 |      |   |
| 2.00000425998582    | 250   | 150 | 0     | Open | ; |
| 29216               | 19509 |     | 21009 |      |   |
| 2.00000528995815    | 150   | 140 | 0     | Open | ; |
| 29217               | 18848 |     | 18772 |      |   |
| 2.00000532148617    | 100   | 140 | 0     | Open | ; |
| 29218               | 19341 |     | 23911 |      |   |
| 2.00000532267045    | 125   | 140 | 0     | Open | ; |
| 29219               | 19374 |     | 23337 |      |   |
| 2.00000540274949    | 100   | 140 | 0     | Open | ; |
| 29220               | 19678 |     | 19679 |      |   |
| 2.00000540979192    | 100   | 140 | 0     | Open | ; |
| 29221               | 22410 |     | 22473 |      |   |
| 2.00000441000225    | 110   | 150 | 0     | Open | ; |
| 29222               | 19005 |     | 19006 |      |   |
| 2.00000550450237    | 160   | 150 | 0     | Open | ; |
| 29223               | 18650 |     | 20006 |      |   |
| 2.00000550517056    | 250   | 100 | 0     | Open | ; |
| 29224               | 23836 |     | 23457 |      |   |
| 2.00000566246328    | 110   | 150 | 0     | Open | ; |
| 29225               | 22541 |     | 22381 |      |   |
| 2.00000566329628    | 125   | 150 | 0     | Open | ; |
| 29226               | 23444 |     | 23888 |      |   |
| 2.00000575936249    | 100   | 140 | 0     | Open | ; |
| 29227               | 19108 |     | 19109 |      |   |
| 2.0000057850537 140 |       | 150 | 0     | Open | ; |
| 29228               | 19634 |     | 24178 |      |   |
| 2.00000582213863    | 200   | 150 | 0     | Open | ; |
| 29229               | 20932 |     | 20933 |      |   |
| 2.00000582262398    | 250   | 150 | 0     | Open | ; |
| 29230               | 19611 |     | 19612 |      |   |
| 2.00000584249335    | 125   | 150 | 0     | Open | ; |
| 29231               | 18675 |     | 18470 |      |   |
| 2.00000600250162    | 100   | 140 | 0     | Open | ; |
| 29232               | 19874 |     | 19875 |      |   |
| 2.00000601033485    | 110   | 150 | 0     | Open | ; |
| 29233               | 18614 |     | 18615 |      |   |
| 2.00000612031306    | 125   | 150 | 0     | Open | ; |
| 29234               | 20652 |     | 20956 |      |   |
| 2.00000613002388    | 125   | 150 | 0     | Open | ; |
| 29235               | 23365 |     | 23369 |      |   |
| 2.0000061308116 110 |       | 150 | 0     | Open | ; |
| 29236               | 19452 |     | 21815 |      |   |
| 2.00000516950783    | 125   | 140 | 0     | Open | ; |
| 29237               | 19480 |     | 23889 |      |   |
| 2.00000624936015    | 110   | 150 | 0     | Open | ; |
| 29238               | 18573 |     | 22848 |      |   |
| 2.00000646481184    | 110   | 150 | 0     | Open | ; |
| 29239               | 23407 |     | 24101 |      |   |

|                     |       |     |       |      |   |
|---------------------|-------|-----|-------|------|---|
| 2.00000660476115    | 160   | 150 | 0     | Open | ; |
| 29240               | 22140 |     | 22138 |      |   |
| 2.00000660482024    | 160   | 150 | 0     | Open | ; |
| 29241               | 20147 |     | 20181 |      |   |
| 2.00000662511533    | 160   | 150 | 0     | Open | ; |
| 29242               | 24365 |     | 21425 |      |   |
| 2.00000663265263    | 110   | 150 | 0     | Open | ; |
| 29243               | 20013 |     | 24231 |      |   |
| 2.00000668464222    | 450   | 100 | 0     | Open | ; |
| 29244               | 20386 |     | 20387 |      |   |
| 2.0000066899158 125 |       | 150 | 0     | Open | ; |
| 29245               | 18978 |     | 18979 |      |   |
| 2.00000672240496    | 200   | 150 | 0     | Open | ; |
| 29246               | 20037 |     | 20038 |      |   |
| 2.00000674199698    | 100   | 140 | 0     | Open | ; |
| 29247               | 23872 |     | 23874 |      |   |
| 2.00000682063199    | 125   | 100 | 0     | Open | ; |
| 29248               | 19620 |     | 19622 |      |   |
| 2.00000684231769    | 200   | 150 | 0     | Open | ; |
| 29249               | 19877 |     | 19878 |      |   |
| 2.00000684333097    | 160   | 150 | 0     | Open | ; |
| 29250               | 18583 |     | 22098 |      |   |
| 2.00000685250082    | 160   | 150 | 0     | Open | ; |
| 29251               | 21027 |     | 21362 |      |   |
| 2.00000690021776    | 125   | 140 | 0     | Open | ; |
| 29252               | 19111 |     | 21635 |      |   |
| 2.00000692230623    | 125   | 150 | 0     | Open | ; |
| 29253               | 24208 |     | 23472 |      |   |
| 2.00000693323424    | 250   | 140 | 0     | Open | ; |
| 29254               | 19655 |     | 18468 |      |   |
| 2.00000600250162    | 100   | 140 | 0     | Open | ; |
| 29255               | 21496 |     | 18803 |      |   |
| 2.00000706024993    | 110   | 150 | 0     | Open | ; |
| 29256               | 21205 |     | 21207 |      |   |
| 2.00000705992432    | 160   | 150 | 0     | Open | ; |
| 29257               | 21988 |     | 23131 |      |   |
| 2.00000613004243    | 110   | 150 | 0     | Open | ; |
| 29258               | 21571 |     | 19736 |      |   |
| 2.00000723299409    | 125   | 150 | 0     | Open | ; |
| 29259               | 19853 |     | 19812 |      |   |
| 2.00000731174537    | 100   | 140 | 0     | Open | ; |
| 29260               | 20524 |     | 20084 |      |   |
| 2.00000732518685    | 110   | 150 | 0     | Open | ; |
| 29261               | 19158 |     | 20417 |      |   |
| 2.00000739241647    | 125   | 150 | 0     | Open | ; |
| 29262               | 20078 |     | 24148 |      |   |
| 2.00000741220717    | 160   | 150 | 0     | Open | ; |
| 29263               | 19990 |     | 19501 |      |   |
| 2.00000747171563    | 200   | 100 | 0     | Open | ; |
| 29264               | 20047 |     | 20048 |      |   |

|                     |       |     |       |      |   |
|---------------------|-------|-----|-------|------|---|
| 2.00000750250063    | 140   | 150 | 0     | Open | ; |
| 29265               | 20868 |     | 23964 |      |   |
| 2.00000756299134    | 100   | 140 | 0     | Open | ; |
| 29266               | 19280 |     | 20890 |      |   |
| 2.00000758221076    | 150   | 140 | 0     | Open | ; |
| 29267               | 21011 |     | 23491 |      |   |
| 2.00000761155358    | 100   | 140 | 0     | Open | ; |
| 29268               | 24055 |     | 24056 |      |   |
| 2.0000076827247 200 |       | 140 | 0     | Open | ; |
| 29269               | 20560 |     | 24338 |      |   |
| 2.00000772545381    | 160   | 150 | 0     | Open | ; |
| 29270               | 21747 |     | 20820 |      |   |
| 2.00000798229635    | 100   | 140 | 0     | Open | ; |
| 29271               | 18674 |     | 19147 |      |   |
| 2.00000600246335    | 100   | 140 | 0     | Open | ; |
| 29272               | 20390 |     | 20391 |      |   |
| 2.00000613005845    | 200   | 150 | 0     | Open | ; |
| 29273               | 19435 |     | 23870 |      |   |
| 2.00000819293391    | 140   | 150 | 0     | Open | ; |
| 29274               | 21379 |     | 21376 |      |   |
| 2.0000084213458 140 |       | 150 | 0     | Open | ; |
| 29275               | 20186 |     | 23054 |      |   |
| 2.00000848147984    | 110   | 150 | 0     | Open | ; |
| 29276               | 22333 |     | 22334 |      |   |
| 2.00000856236482    | 110   | 150 | 0     | Open | ; |
| 29277               | 20949 |     | 21606 |      |   |
| 2.00000857978623    | 125   | 150 | 0     | Open | ; |
| 29278               | 22653 |     | 22654 |      |   |
| 2.00000864934744    | 100   | 140 | 0     | Open | ; |
| 29279               | 23615 |     | 23683 |      |   |
| 2.00000865068245    | 200   | 150 | 0     | Open | ; |
| 29280               | 19690 |     | 19691 |      |   |
| 2.00000872269317    | 300   | 140 | 0     | Open | ; |
| 29281               | 24331 |     | 21918 |      |   |
| 2.00000881221657    | 200   | 150 | 0     | Open | ; |
| 29282               | 19790 |     | 18886 |      |   |
| 2.00000881237079    | 150   | 140 | 0     | Open | ; |
| 29283               | 22179 |     | 22180 |      |   |
| 2.00000896265453    | 150   | 140 | 0     | Open | ; |
| 29284               | 24071 |     | 21431 |      |   |
| 2.00000919245763    | 200   | 140 | 0     | Open | ; |
| 29285               | 21406 |     | 23920 |      |   |
| 2.00000848147624    | 400   | 130 | 0     | Open | ; |
| 29286               | 24287 |     | 19179 |      |   |
| 2.0000095408071 100 |       | 140 | 0     | Open | ; |
| 29287               | 18480 |     | 21042 |      |   |
| 2.00000956244883    | 140   | 150 | 0     | Open | ; |
| 29288               | 24265 |     | 20168 |      |   |
| 2.00000956245723    | 110   | 140 | 0     | Open | ; |
| 29289               | 20719 |     | 22332 |      |   |



|                     |       |     |       |      |   |
|---------------------|-------|-----|-------|------|---|
| 2.00000968351184    | 300   | 140 | 0     | Open | ; |
| 29290               | 24083 |     | 24120 |      |   |
| 2.00000968444601    | 160   | 150 | 0     | Open | ; |
| 29291               | 24222 |     | 23620 |      |   |
| 2.00000971216231    | 125   | 150 | 0     | Open | ; |
| 29292               | 21646 |     | 24270 |      |   |
| 2.00000993154332    | 200   | 140 | 0     | Open | ; |
| 29293               | 21162 |     | 21246 |      |   |
| 2.00000994005944    | 125   | 150 | 0     | Open | ; |
| 29294               | 20885 |     | 24546 |      |   |
| 2.00000996050213    | 200   | 150 | 0     | Open | ; |
| 29295               | 20950 |     | 20951 |      |   |
| 2.0000101250965 110 |       | 150 | 0     | Open | ; |
| 29296               | 22183 |     | 22184 |      |   |
| 2.00001017060234    | 300   | 140 | 0     | Open | ; |
| 29297               | 19670 |     | 19671 |      |   |
| 2.00001022487621    | 200   | 150 | 0     | Open | ; |
| 29298               | 23445 |     | 19141 |      |   |
| 2.00001024048043    | 100   | 140 | 0     | Open | ; |
| 29299               | 19078 |     | 20596 |      |   |
| 2.00001024043694    | 125   | 150 | 0     | Open | ; |
| 29300               | 21879 |     | 20039 |      |   |
| 2.0000102498747 160 |       | 150 | 0     | Open | ; |
| 29301               | 23749 |     | 20342 |      |   |
| 2.00001028434442    | 450   | 100 | 0     | Open | ; |
| 29302               | 19503 |     | 21232 |      |   |
| 2.00001036350045    | 110   | 150 | 0     | Open | ; |
| 29303               | 21820 |     | 24072 |      |   |
| 2.00001046460773    | 150   | 140 | 0     | Open | ; |
| 29304               | 18579 |     | 21458 |      |   |
| 2.00001046470646    | 125   | 150 | 0     | Open | ; |
| 29305               | 19660 |     | 19661 |      |   |
| 2.00001050002943    | 110   | 150 | 0     | Open | ; |
| 29306               | 22210 |     | 22211 |      |   |
| 2.00001052420912    | 110   | 150 | 0     | Open | ; |
| 29307               | 19800 |     | 24012 |      |   |
| 2.00000956244883    | 110   | 150 | 0     | Open | ; |
| 29308               | 21471 |     | 23594 |      |   |
| 2.00001066495551    | 110   | 150 | 0     | Open | ; |
| 29309               | 21775 |     | 22834 |      |   |
| 2.00000971206054    | 300   | 140 | 0     | Open | ; |
| 29310               | 23056 |     | 22116 |      |   |
| 2.00001072192814    | 100   | 140 | 0     | Open | ; |
| 29311               | 23207 |     | 19153 |      |   |
| 2.00001072207461    | 100   | 140 | 0     | Open | ; |
| 29312               | 23076 |     | 23075 |      |   |
| 2.000010722843 100  |       | 140 | 0     | Open | ; |
| 29313               | 20135 |     | 20153 |      |   |
| 2.00001077225492    | 100   | 140 | 0     | Open | ; |
| 29314               | 23111 |     | 23688 |      |   |

|                     |       |     |       |      |   |
|---------------------|-------|-----|-------|------|---|
| 2.00001088936057    | 125   | 150 | 0     | Open | ; |
| 29315               | 23893 |     | 19142 |      |   |
| 2.00001089047597    | 110   | 150 | 0     | Open | ; |
| 29316               | 23018 |     | 20209 |      |   |
| 2.00000996024731    | 100   | 140 | 0     | Open | ; |
| 29317               | 20408 |     | 20411 |      |   |
| 2.00001102493447    | 140   | 150 | 0     | Open | ; |
| 29318               | 18849 |     | 22111 |      |   |
| 2.00001102507197    | 110   | 150 | 0     | Open | ; |
| 29319               | 21792 |     | 23060 |      |   |
| 2.00001102643781    | 110   | 150 | 0     | Open | ; |
| 29320               | 21352 |     | 23838 |      |   |
| 2.00001110180953    | 160   | 150 | 0     | Open | ; |
| 29321               | 20954 |     | 20955 |      |   |
| 2.00001012497625    | 110   | 150 | 0     | Open | ; |
| 29322               | 24356 |     | 20766 |      |   |
| 2.00001118622662    | 160   | 150 | 0     | Open | ; |
| 29323               | 18616 |     | 18617 |      |   |
| 2.00001122031413    | 150   | 140 | 0     | Open | ; |
| 29324               | 20672 |     | 23322 |      |   |
| 2.00001124057449    | 150   | 140 | 0     | Open | ; |
| 29325               | 24060 |     | 23729 |      |   |
| 2.00001024046924    | 110   | 150 | 0     | Open | ; |
| 29326               | 20556 |     | 21610 |      |   |
| 2.0000102498747 110 |       | 150 | 0     | Open | ; |
| 29327               | 21917 |     | 21228 |      |   |
| 2.00001131220119    | 140   | 150 | 0     | Open | ; |
| 29328               | 21599 |     | 21596 |      |   |
| 2.00001131268738    | 160   | 150 | 0     | Open | ; |
| 29329               | 22854 |     | 22855 |      |   |
| 2.00001136970781    | 100   | 140 | 0     | Open | ; |
| 29330               | 19711 |     | 20715 |      |   |
| 2.00001140966398    | 300   | 140 | 0     | Open | ; |
| 29331               | 20056 |     | 19756 |      |   |
| 2.00001148207252    | 110   | 150 | 0     | Open | ; |
| 29332               | 20356 |     | 21952 |      |   |
| 2.000011560471 110  |       | 150 | 0     | Open | ; |
| 29333               | 18627 |     | 18628 |      |   |
| 2.00001160565409    | 100   | 140 | 0     | Open | ; |
| 29334               | 24088 |     | 24089 |      |   |
| 2.00001163171748    | 160   | 150 | 0     | Open | ; |
| 29335               | 19039 |     | 19709 |      |   |
| 2.00001163227785    | 200   | 140 | 0     | Open | ; |
| 29336               | 19759 |     | 24548 |      |   |
| 2.00001163283959    | 200   | 150 | 0     | Open | ; |
| 29337               | 22604 |     | 24230 |      |   |
| 2.0000117000807 160 |       | 150 | 0     | Open | ; |
| 29338               | 21593 |     | 22162 |      |   |
| 1.99123345345462    | 250   | 150 | 0     | Open | ; |
| 29339               | 23077 |     | 20651 |      |   |

|                     |       |     |       |      |   |
|---------------------|-------|-----|-------|------|---|
| 2.00001072207461    | 100   | 140 | 0     | Open | ; |
| 29340               | 21286 |     | 21289 |      |   |
| 2.00001190509585    | 100   | 150 | 0     | Open | ; |
| 29341               | 21140 |     | 19735 |      |   |
| 2.00001190509585    | 100   | 140 | 0     | Open | ; |
| 29342               | 18784 |     | 19265 |      |   |
| 2.00001205203543    | 110   | 150 | 0     | Open | ; |
| 29343               | 19901 |     | 21245 |      |   |
| 2.0000120625449 160 |       | 150 | 0     | Open | ; |
| 29344               | 23766 |     | 20105 |      |   |
| 2.00001225046573    | 160   | 150 | 0     | Open | ; |
| 29345               | 21329 |     | 23010 |      |   |
| 2.00001229258776    | 125   | 140 | 0     | Open | ; |
| 29346               | 24180 |     | 19324 |      |   |
| 2.00001229376886    | 150   | 140 | 0     | Open | ; |
| 29347               | 18959 |     | 19026 |      |   |
| 2.00001232401895    | 110   | 150 | 0     | Open | ; |
| 29348               | 21641 |     | 21642 |      |   |
| 2.00001233051321    | 150   | 140 | 0     | Open | ; |
| 29349               | 22844 |     | 22700 |      |   |
| 2.00001233254045    | 100   | 140 | 0     | Open | ; |
| 29350               | 21913 |     | 21802 |      |   |
| 2.00001236250436    | 110   | 150 | 0     | Open | ; |
| 29351               | 21028 |     | 18575 |      |   |
| 2.00001137051772    | 100   | 140 | 0     | Open | ; |
| 29352               | 20452 |     | 20453 |      |   |
| 2.00001250369071    | 160   | 150 | 0     | Open | ; |
| 29353               | 24602 |     | 20990 |      |   |
| 2.00001252499866    | 160   | 150 | 0     | Open | ; |
| 29354               | 20365 |     | 20366 |      |   |
| 2.00001253251397    | 150   | 140 | 0     | Open | ; |
| 29355               | 21412 |     | 24372 |      |   |
| 2.00001265257617    | 100   | 140 | 0     | Open | ; |
| 29356               | 24129 |     | 20221 |      |   |
| 2.00001270427202    | 150   | 140 | 0     | Open | ; |
| 29357               | 23478 |     | 24099 |      |   |
| 2.00001286240857    | 160   | 150 | 0     | Open | ; |
| 29358               | 23461 |     | 24169 |      |   |
| 2.00001286334392    | 100   | 140 | 0     | Open | ; |
| 29359               | 19912 |     | 19914 |      |   |
| 2.00001292467477    | 150   | 140 | 0     | Open | ; |
| 29360               | 24355 |     | 20764 |      |   |
| 2.00001298523481    | 125   | 150 | 0     | Open | ; |
| 29361               | 22185 |     | 22186 |      |   |
| 2.00001311973432    | 150   | 140 | 0     | Open | ; |
| 29362               | 23642 |     | 23529 |      |   |
| 2.00001316505158    | 100   | 140 | 0     | Open | ; |
| 29363               | 24381 |     | 24383 |      |   |
| 2.00001316515864    | 400   | 130 | 0     | Open | ; |
| 29364               | 20185 |     | 20172 |      |   |

|                     |       |     |       |      |   |
|---------------------|-------|-----|-------|------|---|
| 2.00001328962287    | 110   | 150 | 0     | Open | ; |
| 29365               | 21752 |     | 19788 |      |   |
| 2.00001331244418    | 110   | 150 | 0     | Open | ; |
| 29366               | 22907 |     | 24104 |      |   |
| 2.00001336570124    | 125   | 150 | 0     | Open | ; |
| 29367               | 19717 |     | 19714 |      |   |
| 2.00001343327933    | 200   | 150 | 0     | Open | ; |
| 29368               | 24144 |     | 24145 |      |   |
| 2.00001348453725    | 250   | 140 | 0     | Open | ; |
| 29369               | 23078 |     | 21919 |      |   |
| 2.00001358477251    | 110   | 150 | 0     | Open | ; |
| 29370               | 20488 |     | 20489 |      |   |
| 2.0000135933588 350 |       | 140 | 0     | Open | ; |
| 29371               | 20367 |     | 20368 |      |   |
| 2.00001362516443    | 200   | 140 | 0     | Open | ; |
| 29372               | 21812 |     | 22747 |      |   |
| 2.0000137651306 110 |       | 150 | 0     | Open | ; |
| 29373               | 18913 |     | 20515 |      |   |
| 2.00001286228375    | 250   | 140 | 0     | Open | ; |
| 29374               | 20633 |     | 24165 |      |   |
| 2.00001387169832    | 125   | 150 | 0     | Open | ; |
| 29375               | 21807 |     | 21806 |      |   |
| 2.00001398247912    | 160   | 150 | 0     | Open | ; |
| 29376               | 19139 |     | 20966 |      |   |
| 2.00001398198098    | 125   | 150 | 0     | Open | ; |
| 29377               | 21858 |     | 23873 |      |   |
| 2.00001398244494    | 150   | 100 | 0     | Open | ; |
| 29378               | 20136 |     | 20156 |      |   |
| 2.00001404953857    | 100   | 140 | 0     | Open | ; |
| 29379               | 24344 |     | 19726 |      |   |
| 2.00001418419148    | 110   | 150 | 0     | Open | ; |
| 29380               | 19393 |     | 19395 |      |   |
| 2.00001418441797    | 110   | 150 | 0     | Open | ; |
| 29381               | 21969 |     | 21968 |      |   |
| 2.00001418507112    | 125   | 140 | 0     | Open | ; |
| 29382               | 23386 |     | 23492 |      |   |
| 2.00001425066438    | 150   | 140 | 0     | Open | ; |
| 29383               | 18474 |     | 24245 |      |   |
| 2.00001433265886    | 125   | 150 | 0     | Open | ; |
| 29384               | 19944 |     | 20974 |      |   |
| 2.00001434017083    | 110   | 150 | 0     | Open | ; |
| 29385               | 20891 |     | 21184 |      |   |
| 2.00001433984002    | 110   | 150 | 0     | Open | ; |
| 29386               | 21309 |     | 23631 |      |   |
| 2.00001434017083    | 110   | 150 | 0     | Open | ; |
| 29387               | 23506 |     | 23915 |      |   |
| 1.78743245406039    | 125   | 140 | 0     | Open | ; |
| 29388               | 22450 |     | 21850 |      |   |
| 2.00001451205467    | 160   | 150 | 0     | Open | ; |
| 29389               | 21092 |     | 21093 |      |   |

|                     |       |     |       |      |   |
|---------------------|-------|-----|-------|------|---|
| 2.00001451257968    | 140   | 150 | 0     | Open | ; |
| 29390               | 24026 |     | 23531 |      |   |
| 2.00001461219485    | 200   | 150 | 0     | Open | ; |
| 29391               | 21490 |     | 24142 |      |   |
| 2.00001461229624    | 250   | 140 | 0     | Open | ; |
| 29392               | 19994 |     | 24118 |      |   |
| 2.00001463220192    | 200   | 140 | 0     | Open | ; |
| 29393               | 23759 |     | 19962 |      |   |
| 2.00001463307025    | 125   | 150 | 0     | Open | ; |
| 29394               | 21087 |     | 21088 |      |   |
| 2.00001463217204    | 200   | 150 | 0     | Open | ; |
| 29395               | 18790 |     | 22109 |      |   |
| 2.00001472475836    | 110   | 150 | 0     | Open | ; |
| 29396               | 19510 |     | 21024 |      |   |
| 2.00001478210758    | 125   | 150 | 0     | Open | ; |
| 29397               | 19048 |     | 22857 |      |   |
| 2.00001482208373    | 100   | 140 | 0     | Open | ; |
| 29398               | 24053 |     | 24054 |      |   |
| 2.00001488491229    | 110   | 150 | 0     | Open | ; |
| 29399               | 23817 |     | 23821 |      |   |
| 2.000014919577 160  |       | 150 | 0     | Open | ; |
| 29400               | 23641 |     | 23793 |      |   |
| 2.00001492062193    | 100   | 140 | 0     | Open | ; |
| 29401               | 19121 |     | 20915 |      |   |
| 2.00001509023964    | 200   | 100 | 0     | Open | ; |
| 29402               | 21571 |     | 18891 |      |   |
| 2.00001511270431    | 125   | 150 | 0     | Open | ; |
| 29403               | 20847 |     | 22507 |      |   |
| 2.000015112783 100  |       | 140 | 0     | Open | ; |
| 29404               | 23953 |     | 24286 |      |   |
| 2.00001518217568    | 150   | 140 | 0     | Open | ; |
| 29405               | 23114 |     | 24283 |      |   |
| 2.00001521044705    | 110   | 150 | 0     | Open | ; |
| 29406               | 21412 |     | 21828 |      |   |
| 2.0000152099543 100 |       | 140 | 0     | Open | ; |
| 29407               | 20173 |     | 23862 |      |   |
| 17.7525805742824    | 200   | 140 | 0     | Open | ; |
| 29408               | 23660 |     | 21432 |      |   |
| 17.7488150383095    | 100   | 140 | 0     | Open | ; |
| 29409               | 20831 |     | 21654 |      |   |
| 17.7788960335257    | 100   | 140 | 0     | Open | ; |
| 29411               | 20577 |     | 20620 |      |   |
| 17.8189787056776    | 160   | 150 | 0     | Open | ; |
| 29412               | 21445 |     | 21987 |      |   |
| 17.8222348633914    | 160   | 150 | 0     | Open | ; |
| 29413               | 20419 |     | 23110 |      |   |
| 17.8584206587536    | 160   | 150 | 0     | Open | ; |
| 29414               | 18618 |     | 18619 |      |   |
| 17.898876684629 100 |       | 140 | 0     | Open | ; |
| 29415               | 23679 |     | 23680 |      |   |

|                  |       |     |       |      |   |
|------------------|-------|-----|-------|------|---|
| 17.9988498522085 | 140   | 150 | 0     | Open | ; |
| 29416            | 24231 |     | 23977 |      |   |
| 17.9988667604691 | 110   | 150 | 0     | Open | ; |
| 29417            | 23614 |     | 23612 |      |   |
| 17.9989224571134 | 75    | 150 | 0     | Open | ; |
| 29418            | 19016 |     | 21936 |      |   |
| 17.9989292092075 | 125   | 150 | 0     | Open | ; |
| 29419            | 21160 |     | 21161 |      |   |
| 17.9989602423768 | 125   | 150 | 0     | Open | ; |
| 29420            | 22593 |     | 22818 |      |   |
| 17.9989749761585 | 140   | 150 | 0     | Open | ; |
| 29421            | 18957 |     | 21595 |      |   |
| 17.9989786888394 | 200   | 150 | 0     | Open | ; |
| 29422            | 19767 |     | 21693 |      |   |
| 17.998996236511  | 140   | 150 | 0     | Open | ; |
| 29423            | 23612 |     | 23613 |      |   |
| 17.9990017960945 | 75    | 150 | 0     | Open | ; |
| 29424            | 21790 |     | 23061 |      |   |
| 17.9990336477938 | 75    | 140 | 0     | Open | ; |
| 29425            | 21671 |     | 21672 |      |   |
| 18.0006857669601 | 110   | 150 | 0     | Open | ; |
| 29426            | 21991 |     | 21992 |      |   |
| 18.0031544734734 | 125   | 150 | 0     | Open | ; |
| 29427            | 21269 |     | 20322 |      |   |
| 18.0071326462936 | 75    | 150 | 0     | Open | ; |
| 29428            | 18640 |     | 20995 |      |   |
| 18.0091528468617 | 100   | 140 | 0     | Open | ; |
| 29429            | 23480 |     | 23479 |      |   |
| 18.0565763163839 | 250   | 100 | 0     | Open | ; |
| 29430            | 23036 |     | 18994 |      |   |
| 18.1616680659501 | 200   | 140 | 0     | Open | ; |
| 29431            | 23513 |     | 24673 |      |   |
| 18.1823719329394 | 125   | 150 | 0     | Open | ; |
| 29432            | 19288 |     | 19289 |      |   |
| 18.2093921482415 | 110   | 150 | 0     | Open | ; |
| 29433            | 22405 |     | 20072 |      |   |
| 18.2121502481867 | 110   | 150 | 0     | Open | ; |
| 29434            | 19323 |     | 19324 |      |   |
| 18.2525316872246 | 140   | 150 | 0     | Open | ; |
| 29435            | 19746 |     | 19743 |      |   |
| 18.253117260755  | 100   | 140 | 0     | Open | ; |
| 29436            | 18579 |     | 18580 |      |   |
| 18.290417324468  | 125   | 150 | 0     | Open | ; |
| 29437            | 23482 |     | 23941 |      |   |
| 18.3236492797854 | 100   | 140 | 0     | Open | ; |
| 29438            | 23166 |     | 23167 |      |   |
| 18.3274498228156 | 110   | 150 | 0     | Open | ; |
| 29439            | 21642 |     | 22864 |      |   |
| 18.3497050145545 | 100   | 140 | 0     | Open | ; |
| 29440            | 21256 |     | 21257 |      |   |

|                     |       |     |       |      |   |
|---------------------|-------|-----|-------|------|---|
| 18.3515219465255    | 110   | 150 | 0     | Open | ; |
| 29441               | 24726 |     | 24727 |      |   |
| 18.4238361379162    | 110   | 150 | 0     | Open | ; |
| 29442               | 20901 |     | 20902 |      |   |
| 18.4578232475804    | 100   | 100 | 0     | Open | ; |
| 29444               | 21862 |     | 21863 |      |   |
| 18.4990146551539    | 100   | 140 | 0     | Open | ; |
| 29445               | 20539 |     | 20741 |      |   |
| 18.5313477211738    | 110   | 150 | 0     | Open | ; |
| 29446               | 24520 |     | 24517 |      |   |
| 18.5390349531185    | 110   | 150 | 0     | Open | ; |
| 29447               | 24859 |     | 24860 |      |   |
| 18.6347788023603    | 110   | 150 | 0     | Open | ; |
| 29448               | 23771 |     | 22773 |      |   |
| 18.6479002607473    | 125   | 140 | 0     | Open | ; |
| 29449               | 23833 |     | 23262 |      |   |
| 18.6814113214079    | 100   | 140 | 0     | Open | ; |
| 29450               | 20899 |     | 24910 |      |   |
| 22.3599159435001    | 150   | 140 | 0     | Open | ; |
| 29452               | 20979 |     | 20435 |      |   |
| 18.7903880528631    | 75    | 140 | 0     | Open | ; |
| 29453               | 21958 |     | 21959 |      |   |
| 18.7970961316252    | 75    | 150 | 0     | Open | ; |
| 29454               | 19164 |     | 19165 |      |   |
| 27.5523452545609    | 125   | 140 | 0     | Open | ; |
| 29455               | 19507 |     | 23510 |      |   |
| 18.838174592663 100 |       | 140 | 0     | Open | ; |
| 29456               | 20569 |     | 19579 |      |   |
| 18.8393863513242    | 160   | 150 | 0     | Open | ; |
| 29457               | 20727 |     | 22011 |      |   |
| 18.9033892225141    | 125   | 150 | 0     | Open | ; |
| 29458               | 23323 |     | 23273 |      |   |
| 18.9644159510883    | 160   | 150 | 0     | Open | ; |
| 29459               | 21875 |     | 19415 |      |   |
| 18.9988820800729    | 160   | 150 | 0     | Open | ; |
| 29460               | 22582 |     | 21862 |      |   |
| 18.998882767514 100 |       | 140 | 0     | Open | ; |
| 29461               | 20141 |     | 20142 |      |   |
| 18.9990118041262    | 110   | 150 | 0     | Open | ; |
| 29462               | 19761 |     | 19762 |      |   |
| 18.9991094244228    | 200   | 150 | 0     | Open | ; |
| 29463               | 23779 |     | 23394 |      |   |
| 18.9997743798866    | 100   | 140 | 0     | Open | ; |
| 29464               | 22501 |     | 19746 |      |   |
| 19.0025806022556    | 100   | 140 | 0     | Open | ; |
| 29465               | 22546 |     | 20217 |      |   |
| 19.0297728642096    | 100   | 140 | 0     | Open | ; |
| 29466               | 21794 |     | 21795 |      |   |
| 19.1333318963482    | 75    | 140 | 0     | Open | ; |
| 29467               | 22324 |     | 22325 |      |   |

|                     |       |     |       |      |   |
|---------------------|-------|-----|-------|------|---|
| 19.153186662314 160 |       | 150 | 0     | Open | ; |
| 29468               | 23481 |     | 19209 |      |   |
| 19.1698951079737    | 110   | 150 | 0     | Open | ; |
| 29469               | 22968 |     | 23657 |      |   |
| 19.1940056053334    | 110   | 150 | 0     | Open | ; |
| 29470               | 21130 |     | 21829 |      |   |
| 19.2026829958539    | 100   | 140 | 0     | Open | ; |
| 29471               | 19769 |     | 23333 |      |   |
| 19.22544591442 125  |       | 140 | 0     | Open | ; |
| 29472               | 19892 |     | 23026 |      |   |
| 19.9988963625767    | 200   | 150 | 0     | Open | ; |
| 29473               | 20655 |     | 20658 |      |   |
| 19.2834562165891    | 110   | 150 | 0     | Open | ; |
| 29474               | 21277 |     | 21278 |      |   |
| 19.2914189538176    | 125   | 140 | 0     | Open | ; |
| 29475               | 23528 |     | 24237 |      |   |
| 22.9382537296999    | 100   | 140 | 0     | Open | ; |
| 29476               | 18756 |     | 18864 |      |   |
| 19.3018544523997    | 100   | 140 | 0     | Open | ; |
| 29477               | 22191 |     | 22483 |      |   |
| 19.3194337422643    | 400   | 130 | 0     | Open | ; |
| 29478               | 20388 |     | 22688 |      |   |
| 19.3806554883924    | 125   | 150 | 0     | Open | ; |
| 29479               | 25014 |     | 22283 |      |   |
| 19.3840496783665    | 100   | 140 | 0     | Open | ; |
| 29480               | 23138 |     | 23139 |      |   |
| 19.4039747907647    | 75    | 150 | 0     | Open | ; |
| 29481               | 20738 |     | 22530 |      |   |
| 25.685296861261 110 |       | 150 | 0     | Open | ; |
| 29483               | 21190 |     | 21281 |      |   |
| 19.5127619209503    | 110   | 150 | 0     | Open | ; |
| 29484               | 23389 |     | 23390 |      |   |
| 19.5247429404848    | 200   | 140 | 0     | Open | ; |
| 29485               | 20196 |     | 20197 |      |   |
| 19.5285926926354    | 75    | 100 | 0     | Open | ; |
| 29486               | 23393 |     | 23548 |      |   |
| 21.4333930312639    | 100   | 140 | 0     | Open | ; |
| 29487               | 21519 |     | 21239 |      |   |
| 19.5988959750586    | 160   | 150 | 0     | Open | ; |
| 29488               | 19737 |     | 19857 |      |   |
| 19.6278554267392    | 160   | 150 | 0     | Open | ; |
| 29489               | 24994 |     | 20516 |      |   |
| 19.6421382048852    | 250   | 140 | 0     | Open | ; |
| 29490               | 21048 |     | 21667 |      |   |
| 19.6827247363393    | 250   | 100 | 0     | Open | ; |
| 29491               | 21592 |     | 20760 |      |   |
| 19.7379292692545    | 110   | 150 | 0     | Open | ; |
| 29492               | 21716 |     | 23333 |      |   |
| 19.7450246999878    | 125   | 140 | 0     | Open | ; |
| 29493               | 24125 |     | 20073 |      |   |



|                  |       |     |       |      |   |
|------------------|-------|-----|-------|------|---|
| 19.8379483387136 | 140   | 150 | 0     | Open | ; |
| 29494            | 22944 |     | 18530 |      |   |
| 19.8115720388806 | 200   | 140 | 0     | Open | ; |
| 29495            | 22975 |     | 19750 |      |   |
| 19.8242968756182 | 100   | 140 | 0     | Open | ; |
| 29496            | 23058 |     | 20771 |      |   |
| 19.8417395056031 | 110   | 150 | 0     | Open | ; |
| 29497            | 21445 |     | 21446 |      |   |
| 19.9744759412036 | 160   | 150 | 0     | Open | ; |
| 29498            | 22782 |     | 20931 |      |   |
| 19.9784192504792 | 75    | 150 | 0     | Open | ; |
| 29499            | 19743 |     | 19744 |      |   |
| 19.9971850861437 | 100   | 140 | 0     | Open | ; |
| 29500            | 21890 |     | 24060 |      |   |
| 19.9988756081864 | 110   | 150 | 0     | Open | ; |
| 29501            | 19546 |     | 23095 |      |   |
| 19.9981184114118 | 125   | 150 | 0     | Open | ; |
| 29502            | 18784 |     | 18785 |      |   |
| 19.9987797984949 | 110   | 150 | 0     | Open | ; |
| 29503            | 19655 |     | 23020 |      |   |
| 19.9991994464889 | 100   | 140 | 0     | Open | ; |
| 29504            | 21559 |     | 21531 |      |   |
| 19.9988315709005 | 250   | 140 | 0     | Open | ; |
| 29505            | 21866 |     | 21051 |      |   |
| 19.998835484734  | 150   | 140 | 0     | Open | ; |
| 29506            | 21735 |     | 21736 |      |   |
| 19.9988358619358 | 100   | 140 | 0     | Open | ; |
| 29507            | 18644 |     | 21531 |      |   |
| 19.9993251500358 | 250   | 140 | 0     | Open | ; |
| 29508            | 21241 |     | 21242 |      |   |
| 19.9988482610441 | 160   | 150 | 0     | Open | ; |
| 29509            | 18945 |     | 18946 |      |   |
| 19.998867352917  | 100   | 140 | 0     | Open | ; |
| 29510            | 19184 |     | 19872 |      |   |
| 19.9988791915296 | 75    | 140 | 0     | Open | ; |
| 29511            | 21977 |     | 21976 |      |   |
| 19.9988895881193 | 150   | 140 | 0     | Open | ; |
| 29512            | 18475 |     | 18476 |      |   |
| 19.9989086359897 | 100   | 140 | 0     | Open | ; |
| 29513            | 22587 |     | 23861 |      |   |
| 19.9989368403832 | 110   | 150 | 0     | Open | ; |
| 29514            | 21573 |     | 21539 |      |   |
| 19.9993310100805 | 100   | 140 | 0     | Open | ; |
| 29515            | 22077 |     | 22076 |      |   |
| 20.0002276654356 | 250   | 100 | 0     | Open | ; |
| 29516            | 19919 |     | 20893 |      |   |
| 20.0002905133541 | 200   | 140 | 0     | Open | ; |
| 29517            | 22589 |     | 23136 |      |   |
| 20.0075803520436 | 100   | 140 | 0     | Open | ; |
| 29518            | 23957 |     | 23981 |      |   |

|                     |       |     |       |      |   |
|---------------------|-------|-----|-------|------|---|
| 20.0265014802792    | 100   | 140 | 0     | Open | ; |
| 29519               | 19994 |     | 21557 |      |   |
| 20.045925172112 200 |       | 140 | 0     | Open | ; |
| 29520               | 21375 |     | 18882 |      |   |
| 20.0814672149211    | 140   | 150 | 0     | Open | ; |
| 29521               | 19837 |     | 18536 |      |   |
| 20.110593478831 75  |       | 150 | 0     | Open | ; |
| 29522               | 21592 |     | 22433 |      |   |
| 20.1555060017107    | 110   | 150 | 0     | Open | ; |
| 29523               | 21783 |     | 23458 |      |   |
| 20.2396797210563    | 75    | 150 | 0     | Open | ; |
| 29524               | 24730 |     | 24731 |      |   |
| 20.2426753621236    | 110   | 150 | 0     | Open | ; |
| 29525               | 21825 |     | 21826 |      |   |
| 20.2693433305599    | 200   | 150 | 0     | Open | ; |
| 29526               | 21223 |     | 21224 |      |   |
| 20.2912147761197    | 100   | 140 | 0     | Open | ; |
| 29527               | 23008 |     | 24309 |      |   |
| 20.3274454260452    | 150   | 140 | 0     | Open | ; |
| 29528               | 23950 |     | 23257 |      |   |
| 21.2304116737914    | 140   | 150 | 0     | Open | ; |
| 29529               | 20095 |     | 20096 |      |   |
| 20.3715309609395    | 200   | 150 | 0     | Open | ; |
| 29530               | 19056 |     | 21234 |      |   |
| 20.3829551405339    | 150   | 140 | 0     | Open | ; |
| 29531               | 21598 |     | 18584 |      |   |
| 20.4072660246163    | 160   | 150 | 0     | Open | ; |
| 29532               | 20553 |     | 20554 |      |   |
| 20.4193362764725    | 110   | 150 | 0     | Open | ; |
| 29533               | 21738 |     | 25069 |      |   |
| 22.0344591135931    | 110   | 150 | 0     | Open | ; |
| 29534               | 23355 |     | 23433 |      |   |
| 20.4524278398218    | 100   | 140 | 0     | Open | ; |
| 29535               | 24533 |     | 24534 |      |   |
| 20.4954455882157    | 160   | 150 | 0     | Open | ; |
| 29536               | 23073 |     | 20151 |      |   |
| 20.4982870725066    | 75    | 140 | 0     | Open | ; |
| 29537               | 21717 |     | 21658 |      |   |
| 20.5986616030561    | 250   | 140 | 0     | Open | ; |
| 29538               | 20542 |     | 23158 |      |   |
| 20.6183442625041    | 110   | 150 | 0     | Open | ; |
| 29539               | 21913 |     | 21914 |      |   |
| 20.6470118785848    | 110   | 150 | 0     | Open | ; |
| 29540               | 24430 |     | 24431 |      |   |
| 20.649384892876 75  |       | 150 | 0     | Open | ; |
| 29541               | 20402 |     | 20626 |      |   |
| 20.6655681178359    | 200   | 150 | 0     | Open | ; |
| 29542               | 20855 |     | 19555 |      |   |
| 20.6879880434314    | 150   | 140 | 0     | Open | ; |
| 29543               | 19295 |     | 22969 |      |   |

|                     |       |     |       |      |   |
|---------------------|-------|-----|-------|------|---|
| 22.6295165602003    | 100   | 140 | 0     | Open | ; |
| 29544               | 18585 |     | 21982 |      |   |
| 20.7447826099435    | 160   | 150 | 0     | Open | ; |
| 29545               | 21489 |     | 21819 |      |   |
| 20.7670058726532    | 250   | 140 | 0     | Open | ; |
| 29546               | 23739 |     | 19226 |      |   |
| 20.8090396517904    | 110   | 150 | 0     | Open | ; |
| 29547               | 24161 |     | 21141 |      |   |
| 20.8278033434981    | 160   | 150 | 0     | Open | ; |
| 29548               | 22268 |     | 22224 |      |   |
| 20.8619509397266    | 140   | 150 | 0     | Open | ; |
| 29549               | 22204 |     | 22447 |      |   |
| 20.8619875974915    | 200   | 150 | 0     | Open | ; |
| 29550               | 19312 |     | 19907 |      |   |
| 26.7714699412991    | 160   | 150 | 0     | Open | ; |
| 29551               | 24926 |     | 24927 |      |   |
| 20.8670538513338    | 110   | 150 | 0     | Open | ; |
| 29552               | 23546 |     | 23668 |      |   |
| 20.9250824345297    | 110   | 150 | 0     | Open | ; |
| 29553               | 24511 |     | 24507 |      |   |
| 20.939517329526 110 |       | 150 | 0     | Open | ; |
| 29554               | 22125 |     | 20068 |      |   |
| 20.9543169872902    | 100   | 140 | 0     | Open | ; |
| 29555               | 18831 |     | 21990 |      |   |
| 20.9614385077966    | 75    | 150 | 0     | Open | ; |
| 29556               | 22314 |     | 22315 |      |   |
| 20.9664708548079    | 110   | 150 | 0     | Open | ; |
| 29557               | 19422 |     | 19428 |      |   |
| 20.9746289005443    | 140   | 150 | 0     | Open | ; |
| 29558               | 21987 |     | 21875 |      |   |
| 20.998728962878 160 |       | 150 | 0     | Open | ; |
| 29559               | 23661 |     | 23662 |      |   |
| 20.998805859281 140 |       | 150 | 0     | Open | ; |
| 29560               | 20113 |     | 23936 |      |   |
| 20.998843574157 75  |       | 150 | 0     | Open | ; |
| 29561               | 22415 |     | 22605 |      |   |
| 20.999072657764 200 |       | 150 | 0     | Open | ; |
| 29562               | 19937 |     | 22163 |      |   |
| 21.0106399819998    | 150   | 140 | 0     | Open | ; |
| 29563               | 22698 |     | 22699 |      |   |
| 21.022079551941 110 |       | 150 | 0     | Open | ; |
| 29564               | 21290 |     | 21292 |      |   |
| 21.0405307960257    | 100   | 140 | 0     | Open | ; |
| 29565               | 19469 |     | 19182 |      |   |
| 21.0427147959226    | 100   | 140 | 0     | Open | ; |
| 29566               | 21880 |     | 21881 |      |   |
| 21.0622865960099    | 110   | 150 | 0     | Open | ; |
| 29567               | 24066 |     | 24952 |      |   |
| 21.0648708457985    | 125   | 150 | 0     | Open | ; |
| 29568               | 24113 |     | 21333 |      |   |

|                     |       |     |       |      |   |
|---------------------|-------|-----|-------|------|---|
| 21.0981609511325    | 125   | 150 | 0     | Open | ; |
| 29569               | 24861 |     | 24833 |      |   |
| 21.1366314981518    | 140   | 150 | 0     | Open | ; |
| 29571               | 21230 |     | 21231 |      |   |
| 21.155045515518 400 |       | 130 | 0     | Open | ; |
| 29572               | 18646 |     | 19012 |      |   |
| 21.1572285881338    | 110   | 150 | 0     | Open | ; |
| 29573               | 23939 |     | 23940 |      |   |
| 21.1710007948983    | 100   | 140 | 0     | Open | ; |
| 29574               | 22688 |     | 23998 |      |   |
| 21.1781667208056    | 125   | 150 | 0     | Open | ; |
| 29575               | 23449 |     | 23452 |      |   |
| 21.2115810788023    | 160   | 150 | 0     | Open | ; |
| 29576               | 21395 |     | 21031 |      |   |
| 21.2930485734274    | 100   | 140 | 0     | Open | ; |
| 29577               | 24354 |     | 20673 |      |   |
| 21.3041726925827    | 160   | 150 | 0     | Open | ; |
| 29578               | 21441 |     | 21442 |      |   |
| 21.3073672622501    | 75    | 140 | 0     | Open | ; |
| 29579               | 24560 |     | 24559 |      |   |
| 21.3112637877955    | 140   | 150 | 0     | Open | ; |
| 29580               | 20268 |     | 18529 |      |   |
| 21.3801255750775    | 250   | 150 | 0     | Open | ; |
| 29581               | 19036 |     | 21733 |      |   |
| 21.4164541795008    | 110   | 150 | 0     | Open | ; |
| 29582               | 24534 |     | 23817 |      |   |
| 21.4527420644729    | 160   | 150 | 0     | Open | ; |
| 29583               | 21400 |     | 23840 |      |   |
| 21.4995973195901    | 200   | 150 | 0     | Open | ; |
| 29584               | 23324 |     | 21080 |      |   |
| 21.505110493806 110 |       | 150 | 0     | Open | ; |
| 29585               | 21955 |     | 21956 |      |   |
| 21.5070203212768    | 140   | 150 | 0     | Open | ; |
| 29586               | 21005 |     | 25147 |      |   |
| 21.5253911459774    | 75    | 150 | 0     | Open | ; |
| 29587               | 20206 |     | 20204 |      |   |
| 21.5715877475518    | 75    | 140 | 0     | Open | ; |
| 29588               | 24464 |     | 24467 |      |   |
| 21.6156538450301    | 110   | 150 | 0     | Open | ; |
| 29589               | 25020 |     | 24474 |      |   |
| 21.6614776093672    | 110   | 150 | 0     | Open | ; |
| 29590               | 23354 |     | 23355 |      |   |
| 21.6739021405764    | 100   | 140 | 0     | Open | ; |
| 29591               | 19934 |     | 23399 |      |   |
| 21.6814599598252    | 110   | 150 | 0     | Open | ; |
| 29592               | 20654 |     | 20655 |      |   |
| 21.6822508241355    | 110   | 150 | 0     | Open | ; |
| 29593               | 24420 |     | 24421 |      |   |
| 21.7510746233148    | 200   | 150 | 0     | Open | ; |
| 29594               | 23986 |     | 21032 |      |   |

|                     |       |     |       |      |   |
|---------------------|-------|-----|-------|------|---|
| 21.7612409254415    | 75    | 140 | 0     | Open | ; |
| 29595               | 22976 |     | 22977 |      |   |
| 21.7653433771159    | 125   | 150 | 0     | Open | ; |
| 29596               | 20992 |     | 20226 |      |   |
| 23.7949136134705    | 125   | 140 | 0     | Open | ; |
| 29597               | 19540 |     | 23508 |      |   |
| 21.933118607586 75  |       | 150 | 0     | Open | ; |
| 29598               | 20441 |     | 20837 |      |   |
| 21.9650684081476    | 140   | 150 | 0     | Open | ; |
| 29599               | 18563 |     | 24954 |      |   |
| 21.9895237661965    | 200   | 150 | 0     | Open | ; |
| 29600               | 20362 |     | 23963 |      |   |
| 21.9987160975242    | 100   | 140 | 0     | Open | ; |
| 29601               | 22155 |     | 22156 |      |   |
| 21.998525562545 75  |       | 150 | 0     | Open | ; |
| 29602               | 22151 |     | 22152 |      |   |
| 21.9985691463442    | 110   | 150 | 0     | Open | ; |
| 29603               | 23056 |     | 23057 |      |   |
| 21.9987212742871    | 100   | 140 | 0     | Open | ; |
| 29604               | 21737 |     | 21738 |      |   |
| 21.9987502751715    | 110   | 150 | 0     | Open | ; |
| 29605               | 20529 |     | 20530 |      |   |
| 21.9987840197269    | 110   | 150 | 0     | Open | ; |
| 29606               | 22157 |     | 22158 |      |   |
| 21.998784973612 200 |       | 150 | 0     | Open | ; |
| 29607               | 21462 |     | 21463 |      |   |
| 21.998786114368 100 |       | 140 | 0     | Open | ; |
| 29608               | 21305 |     | 21306 |      |   |
| 21.9988826489865    | 75    | 140 | 0     | Open | ; |
| 29609               | 19446 |     | 21832 |      |   |
| 21.9993706502463    | 75    | 140 | 0     | Open | ; |
| 29610               | 20163 |     | 20164 |      |   |
| 22.0027501568494    | 75    | 150 | 0     | Open | ; |
| 29611               | 23098 |     | 23099 |      |   |
| 22.0101052432413    | 200   | 140 | 0     | Open | ; |
| 29612               | 20620 |     | 18992 |      |   |
| 22.1124276490915    | 160   | 150 | 0     | Open | ; |
| 29613               | 22344 |     | 23664 |      |   |
| 22.139762710985 110 |       | 150 | 0     | Open | ; |
| 29614               | 18885 |     | 21446 |      |   |
| 22.140321599163 160 |       | 150 | 0     | Open | ; |
| 29615               | 20640 |     | 20641 |      |   |
| 22.141283359591 160 |       | 150 | 0     | Open | ; |
| 29616               | 20756 |     | 21878 |      |   |
| 25.6179074059268    | 160   | 150 | 0     | Open | ; |
| 29617               | 24736 |     | 24727 |      |   |
| 22.1925727891474    | 140   | 150 | 0     | Open | ; |
| 29618               | 22473 |     | 22474 |      |   |
| 22.2052435930766    | 100   | 140 | 0     | Open | ; |
| 29619               | 21247 |     | 21248 |      |   |

|                     |       |     |       |      |   |
|---------------------|-------|-----|-------|------|---|
| 22.2243172619986    | 110   | 150 | 0     | Open | ; |
| 29620               | 22816 |     | 23213 |      |   |
| 22.2467976420575    | 110   | 150 | 0     | Open | ; |
| 29621               | 23488 |     | 24602 |      |   |
| 22.2986399041283    | 160   | 150 | 0     | Open | ; |
| 29622               | 20252 |     | 21337 |      |   |
| 29.368216809052 100 |       | 140 | 0     | Open | ; |
| 29623               | 24581 |     | 24582 |      |   |
| 23.2268872598948    | 140   | 150 | 0     | Open | ; |
| 29624               | 24738 |     | 24746 |      |   |
| 22.3868466282451    | 110   | 150 | 0     | Open | ; |
| 29625               | 24663 |     | 24664 |      |   |
| 22.4783330001113    | 200   | 150 | 0     | Open | ; |
| 29626               | 23995 |     | 23258 |      |   |
| 23.3800749654645    | 140   | 150 | 0     | Open | ; |
| 29627               | 23738 |     | 23739 |      |   |
| 22.4925733197712    | 110   | 150 | 0     | Open | ; |
| 29628               | 20217 |     | 23441 |      |   |
| 22.4987929911214    | 100   | 140 | 0     | Open | ; |
| 29629               | 21624 |     | 20711 |      |   |
| 22.5473080399205    | 160   | 150 | 0     | Open | ; |
| 29630               | 24781 |     | 24784 |      |   |
| 22.5797690980713    | 160   | 150 | 0     | Open | ; |
| 29631               | 24675 |     | 24673 |      |   |
| 22.6453895995969    | 110   | 150 | 0     | Open | ; |
| 29632               | 20553 |     | 20608 |      |   |
| 22.6519186444977    | 110   | 150 | 0     | Open | ; |
| 29633               | 24502 |     | 23155 |      |   |
| 22.7104395868516    | 110   | 150 | 0     | Open | ; |
| 29634               | 24639 |     | 24640 |      |   |
| 22.7278769686821    | 160   | 150 | 0     | Open | ; |
| 29635               | 23334 |     | 19769 |      |   |
| 22.7506131314958    | 125   | 140 | 0     | Open | ; |
| 29636               | 19228 |     | 19225 |      |   |
| 22.7624854568815    | 110   | 150 | 0     | Open | ; |
| 29637               | 24719 |     | 24717 |      |   |
| 22.773286899598 110 |       | 150 | 0     | Open | ; |
| 29638               | 23990 |     | 25067 |      |   |
| 22.9986835381949    | 110   | 150 | 0     | Open | ; |
| 29639               | 24818 |     | 21525 |      |   |
| 22.8372164824434    | 110   | 150 | 0     | Open | ; |
| 29640               | 24764 |     | 24788 |      |   |
| 22.8461672265754    | 75    | 150 | 0     | Open | ; |
| 29641               | 20247 |     | 21618 |      |   |
| 22.8538269504623    | 160   | 150 | 0     | Open | ; |
| 29642               | 21648 |     | 24057 |      |   |
| 22.8605059572033    | 125   | 140 | 0     | Open | ; |
| 29643               | 24281 |     | 23421 |      |   |
| 22.8617039293411    | 110   | 150 | 0     | Open | ; |
| 29644               | 22257 |     | 22260 |      |   |

|                     |       |     |       |      |   |
|---------------------|-------|-----|-------|------|---|
| 22.8622230618439    | 110   | 150 | 0     | Open | ; |
| 29645               | 23243 |     | 23244 |      |   |
| 22.8691642351779    | 110   | 150 | 0     | Open | ; |
| 29646               | 18928 |     | 18929 |      |   |
| 23.8121619946395    | 140   | 150 | 0     | Open | ; |
| 29647               | 19875 |     | 23976 |      |   |
| 22.9331986567144    | 75    | 150 | 0     | Open | ; |
| 29648               | 20068 |     | 20069 |      |   |
| 22.973540153639 150 |       | 140 | 0     | Open | ; |
| 29649               | 22233 |     | 19072 |      |   |
| 22.9775482354164    | 140   | 150 | 0     | Open | ; |
| 29650               | 22510 |     | 25153 |      |   |
| 23.2077280135405    | 140   | 150 | 0     | Open | ; |
| 29651               | 20690 |     | 19009 |      |   |
| 22.9851255520775    | 110   | 150 | 0     | Open | ; |
| 29652               | 19115 |     | 20063 |      |   |
| 22.9855713280071    | 75    | 140 | 0     | Open | ; |
| 29653               | 20801 |     | 20803 |      |   |
| 22.9928628196421    | 250   | 100 | 0     | Open | ; |
| 29654               | 23146 |     | 21392 |      |   |
| 22.9973631339502    | 75    | 140 | 0     | Open | ; |
| 29655               | 21687 |     | 21688 |      |   |
| 22.9985681724311    | 75    | 140 | 0     | Open | ; |
| 29656               | 21668 |     | 20515 |      |   |
| 22.9985929105199    | 75    | 150 | 0     | Open | ; |
| 29657               | 21140 |     | 18890 |      |   |
| 22.9986151338098    | 100   | 140 | 0     | Open | ; |
| 29658               | 19405 |     | 19406 |      |   |
| 22.9986556398906    | 100   | 140 | 0     | Open | ; |
| 29659               | 23095 |     | 19902 |      |   |
| 22.9986826558279    | 125   | 150 | 0     | Open | ; |
| 29660               | 21522 |     | 21523 |      |   |
| 22.99871710185 160  |       | 150 | 0     | Open | ; |
| 29661               | 20313 |     | 20311 |      |   |
| 22.9987194439707    | 110   | 150 | 0     | Open | ; |
| 29662               | 19564 |     | 24986 |      |   |
| 22.9987396713998    | 160   | 150 | 0     | Open | ; |
| 29663               | 18499 |     | 23552 |      |   |
| 22.9988432959781    | 110   | 150 | 0     | Open | ; |
| 29664               | 23204 |     | 18999 |      |   |
| 22.9996273688196    | 125   | 140 | 0     | Open | ; |
| 29665               | 19156 |     | 24243 |      |   |
| 23.0007786990879    | 100   | 140 | 0     | Open | ; |
| 29666               | 19183 |     | 19184 |      |   |
| 23.0170414861731    | 75    | 140 | 0     | Open | ; |
| 29667               | 24129 |     | 20219 |      |   |
| 24.9987072700633    | 150   | 140 | 0     | Open | ; |
| 29668               | 22277 |     | 22279 |      |   |
| 23.0568066564772    | 200   | 150 | 0     | Open | ; |
| 29669               | 23872 |     | 23873 |      |   |

|                     |       |     |       |      |   |
|---------------------|-------|-----|-------|------|---|
| 23.1403061566703    | 125   | 100 | 0     | Open | ; |
| 29670               | 22997 |     | 20218 |      |   |
| 23.1692617106521    | 75    | 140 | 0     | Open | ; |
| 29671               | 23331 |     | 23332 |      |   |
| 23.180934035499 160 |       | 150 | 0     | Open | ; |
| 29672               | 21742 |     | 23777 |      |   |
| 23.2124264024761    | 110   | 150 | 0     | Open | ; |
| 29673               | 22464 |     | 22465 |      |   |
| 23.2497490164229    | 110   | 150 | 0     | Open | ; |
| 29674               | 19826 |     | 21783 |      |   |
| 23.2589060959803    | 75    | 150 | 0     | Open | ; |
| 29675               | 22070 |     | 20314 |      |   |
| 23.298671560091 160 |       | 150 | 0     | Open | ; |
| 29676               | 23142 |     | 22157 |      |   |
| 23.3771780207709    | 200   | 150 | 0     | Open | ; |
| 29677               | 21649 |     | 25071 |      |   |
| 23.4948459580176    | 100   | 140 | 0     | Open | ; |
| 29678               | 20519 |     | 21053 |      |   |
| 24.2457619072067    | 75    | 150 | 0     | Open | ; |
| 29679               | 22032 |     | 19905 |      |   |
| 23.5331676509428    | 100   | 140 | 0     | Open | ; |
| 29680               | 22256 |     | 21266 |      |   |
| 23.5366142102721    | 110   | 150 | 0     | Open | ; |
| 29681               | 21863 |     | 23354 |      |   |
| 23.6056204590531    | 100   | 140 | 0     | Open | ; |
| 29682               | 22708 |     | 22709 |      |   |
| 23.6578671585794    | 110   | 150 | 0     | Open | ; |
| 29683               | 21689 |     | 22945 |      |   |
| 23.7066379089936    | 100   | 140 | 0     | Open | ; |
| 29684               | 20085 |     | 20528 |      |   |
| 32.134818074551 200 |       | 140 | 0     | Open | ; |
| 29685               | 21604 |     | 20534 |      |   |
| 23.7708552698964    | 110   | 150 | 0     | Open | ; |
| 29686               | 18586 |     | 18587 |      |   |
| 23.7737154750435    | 160   | 150 | 0     | Open | ; |
| 29687               | 24582 |     | 23259 |      |   |
| 23.777406187982 140 |       | 150 | 0     | Open | ; |
| 29688               | 21921 |     | 23131 |      |   |
| 23.8455800037908    | 75    | 150 | 0     | Open | ; |
| 29689               | 18631 |     | 21301 |      |   |
| 23.8593996036171    | 250   | 140 | 0     | Open | ; |
| 29690               | 21272 |     | 21273 |      |   |
| 23.9144478263495    | 75    | 140 | 0     | Open | ; |
| 29691               | 24351 |     | 24989 |      |   |
| 31.76896384352 110  |       | 150 | 0     | Open | ; |
| 29692               | 23593 |     | 20255 |      |   |
| 33.9678364172142    | 250   | 140 | 0     | Open | ; |
| 29693               | 19462 |     | 18679 |      |   |
| 29.0455208695678    | 160   | 150 | 0     | Open | ; |
| 29694               | 21469 |     | 21470 |      |   |



|                     |       |     |       |      |   |
|---------------------|-------|-----|-------|------|---|
| 23.9985110402565    | 125   | 150 | 0     | Open | ; |
| 29695               | 19541 |     | 23509 |      |   |
| 23.9985972872625    | 75    | 150 | 0     | Open | ; |
| 29696               | 21956 |     | 20354 |      |   |
| 23.9986214288176    | 140   | 150 | 0     | Open | ; |
| 29697               | 22818 |     | 23446 |      |   |
| 23.9986351329027    | 140   | 150 | 0     | Open | ; |
| 29698               | 24640 |     | 21707 |      |   |
| 23.9986474173194    | 160   | 150 | 0     | Open | ; |
| 29699               | 20868 |     | 20869 |      |   |
| 23.9987979995582    | 100   | 140 | 0     | Open | ; |
| 29700               | 20061 |     | 19114 |      |   |
| 23.9989762514385    | 75    | 140 | 0     | Open | ; |
| 29701               | 23425 |     | 19521 |      |   |
| 24.0053170239774    | 200   | 150 | 0     | Open | ; |
| 29702               | 22988 |     | 22989 |      |   |
| 24.0477008784517    | 110   | 150 | 0     | Open | ; |
| 29703               | 23784 |     | 23785 |      |   |
| 24.1092637168825    | 125   | 140 | 0     | Open | ; |
| 29704               | 24482 |     | 24483 |      |   |
| 24.114827988491 110 |       | 150 | 0     | Open | ; |
| 29705               | 20848 |     | 22975 |      |   |
| 24.2021967234161    | 100   | 140 | 0     | Open | ; |
| 29706               | 18777 |     | 18775 |      |   |
| 24.2103953634459    | 160   | 150 | 0     | Open | ; |
| 29707               | 18584 |     | 18585 |      |   |
| 24.2185691683605    | 160   | 150 | 0     | Open | ; |
| 29708               | 20616 |     | 20849 |      |   |
| 24.2249599310621    | 110   | 150 | 0     | Open | ; |
| 29709               | 20647 |     | 20648 |      |   |
| 24.2653970850109    | 75    | 140 | 0     | Open | ; |
| 29710               | 19843 |     | 19844 |      |   |
| 24.2736733965834    | 125   | 140 | 0     | Open | ; |
| 29711               | 21358 |     | 21359 |      |   |
| 24.3125414893601    | 100   | 140 | 0     | Open | ; |
| 29712               | 20201 |     | 24045 |      |   |
| 25.1370395784167    | 100   | 140 | 0     | Open | ; |
| 29713               | 21283 |     | 21189 |      |   |
| 24.4637164236947    | 110   | 150 | 0     | Open | ; |
| 29714               | 23051 |     | 23052 |      |   |
| 24.4987127510098    | 110   | 150 | 0     | Open | ; |
| 29715               | 24725 |     | 24720 |      |   |
| 24.5979965499447    | 110   | 150 | 0     | Open | ; |
| 29716               | 22251 |     | 22252 |      |   |
| 24.6045101522882    | 75    | 150 | 0     | Open | ; |
| 29717               | 20959 |     | 22726 |      |   |
| 24.6280025287354    | 110   | 150 | 0     | Open | ; |
| 29718               | 24588 |     | 19782 |      |   |
| 24.6282399394477    | 110   | 150 | 0     | Open | ; |
| 29719               | 20751 |     | 20752 |      |   |

|                     |       |     |       |      |   |
|---------------------|-------|-----|-------|------|---|
| 24.6517080187114    | 110   | 150 | 0     | Open | ; |
| 29720               | 24662 |     | 23159 |      |   |
| 24.6769550714454    | 110   | 150 | 0     | Open | ; |
| 29721               | 19104 |     | 19105 |      |   |
| 24.6896456647921    | 75    | 150 | 0     | Open | ; |
| 29722               | 19178 |     | 19179 |      |   |
| 24.806958828678 75  |       | 140 | 0     | Open | ; |
| 29723               | 20470 |     | 20659 |      |   |
| 24.837903946413 160 |       | 150 | 0     | Open | ; |
| 29724               | 23256 |     | 23577 |      |   |
| 24.8580094798531    | 100   | 140 | 0     | Open | ; |
| 29725               | 25069 |     | 22252 |      |   |
| 212.948782606946    | 75    | 150 | 0     | Open | ; |
| 29726               | 21464 |     | 18484 |      |   |
| 24.9557744821388    | 110   | 150 | 0     | Open | ; |
| 29727               | 22611 |     | 21490 |      |   |
| 24.9901247160881    | 250   | 140 | 0     | Open | ; |
| 29728               | 25019 |     | 22296 |      |   |
| 24.9910585117848    | 100   | 140 | 0     | Open | ; |
| 29729               | 19185 |     | 19186 |      |   |
| 24.9979188130763    | 110   | 150 | 0     | Open | ; |
| 29730               | 19335 |     | 19336 |      |   |
| 24.9984259185603    | 75    | 150 | 0     | Open | ; |
| 29731               | 19264 |     | 20941 |      |   |
| 24.9985457962478    | 75    | 150 | 0     | Open | ; |
| 29732               | 21548 |     | 21549 |      |   |
| 24.9985907605577    | 110   | 150 | 0     | Open | ; |
| 29733               | 20155 |     | 22996 |      |   |
| 24.9986043964399    | 75    | 140 | 0     | Open | ; |
| 29734               | 22934 |     | 21018 |      |   |
| 24.9986126115788    | 110   | 150 | 0     | Open | ; |
| 29735               | 20341 |     | 20559 |      |   |
| 24.9986280534386    | 160   | 150 | 0     | Open | ; |
| 29736               | 21018 |     | 22932 |      |   |
| 24.9987944290793    | 110   | 150 | 0     | Open | ; |
| 29737               | 24505 |     | 24506 |      |   |
| 24.9999040717735    | 110   | 150 | 0     | Open | ; |
| 29738               | 24459 |     | 24460 |      |   |
| 25.0000497461921    | 110   | 150 | 0     | Open | ; |
| 29739               | 20894 |     | 21221 |      |   |
| 25.0043694286098    | 100   | 140 | 0     | Open | ; |
| 29740               | 24596 |     | 24555 |      |   |
| 25.3468801403104    | 200   | 150 | 0     | Open | ; |
| 29741               | 24609 |     | 25059 |      |   |
| 25.0264521721793    | 160   | 150 | 0     | Open | ; |
| 29742               | 23223 |     | 21165 |      |   |
| 25.1261303766 100   |       | 140 | 0     | Open | ; |
| 29743               | 18661 |     | 22443 |      |   |
| 25.1418147969031    | 110   | 150 | 0     | Open | ; |
| 29744               | 21884 |     | 19011 |      |   |

|                     |       |     |       |      |   |
|---------------------|-------|-----|-------|------|---|
| 25.175849966165 110 |       | 150 | 0     | Open | ; |
| 29745               | 21367 |     | 21368 |      |   |
| 25.192150623717 100 |       | 140 | 0     | Open | ; |
| 29746               | 21504 |     | 18712 |      |   |
| 25.2226693480841    | 110   | 150 | 0     | Open | ; |
| 29747               | 20397 |     | 18567 |      |   |
| 25.2484521594006    | 110   | 150 | 0     | Open | ; |
| 29748               | 22221 |     | 22225 |      |   |
| 25.2484521591898    | 110   | 150 | 0     | Open | ; |
| 29749               | 22270 |     | 20767 |      |   |
| 25.2484521591898    | 110   | 150 | 0     | Open | ; |
| 29750               | 20843 |     | 20844 |      |   |
| 25.2610541836705    | 100   | 140 | 0     | Open | ; |
| 29751               | 18691 |     | 18612 |      |   |
| 25.3254553986914    | 140   | 150 | 0     | Open | ; |
| 29752               | 20997 |     | 21834 |      |   |
| 25.3814869381173    | 75    | 140 | 0     | Open | ; |
| 29753               | 23323 |     | 18783 |      |   |
| 25.387611625403 160 |       | 150 | 0     | Open | ; |
| 29754               | 23162 |     | 23163 |      |   |
| 25.4139712962171    | 100   | 140 | 0     | Open | ; |
| 29755               | 24047 |     | 22560 |      |   |
| 25.419654757464 110 |       | 150 | 0     | Open | ; |
| 29756               | 23869 |     | 19435 |      |   |
| 25.5099784170255    | 140   | 150 | 0     | Open | ; |
| 29757               | 24935 |     | 24936 |      |   |
| 25.5373922808272    | 110   | 150 | 0     | Open | ; |
| 29758               | 24413 |     | 22725 |      |   |
| 25.5604018239763    | 125   | 150 | 0     | Open | ; |
| 29759               | 21208 |     | 21210 |      |   |
| 25.5969554062127    | 75    | 140 | 0     | Open | ; |
| 29760               | 21610 |     | 21611 |      |   |
| 25.7028355226997    | 75    | 150 | 0     | Open | ; |
| 29761               | 20061 |     | 20062 |      |   |
| 25.8152498745279    | 75    | 140 | 0     | Open | ; |
| 29762               | 24402 |     | 24403 |      |   |
| 25.8899737988781    | 110   | 150 | 0     | Open | ; |
| 29763               | 24671 |     | 24672 |      |   |
| 25.9623239922277    | 160   | 150 | 0     | Open | ; |
| 29764               | 19678 |     | 20028 |      |   |
| 25.9943821856267    | 100   | 140 | 0     | Open | ; |
| 29765               | 20135 |     | 20136 |      |   |
| 25.9985133615858    | 100   | 140 | 0     | Open | ; |
| 29766               | 21213 |     | 21214 |      |   |
| 25.9985167501544    | 125   | 150 | 0     | Open | ; |
| 29767               | 23219 |     | 23220 |      |   |
| 25.9985709347631    | 200   | 150 | 0     | Open | ; |
| 29768               | 21836 |     | 21835 |      |   |
| 25.9987697126528    | 75    | 140 | 0     | Open | ; |
| 29769               | 24512 |     | 24513 |      |   |

|                     |       |     |       |      |   |
|---------------------|-------|-----|-------|------|---|
| 25.9998829930515    | 75    | 150 | 0     | Open | ; |
| 29770               | 23048 |     | 22582 |      |   |
| 26.0061432620235    | 100   | 140 | 0     | Open | ; |
| 29771               | 20019 |     | 23738 |      |   |
| 26.022977484679 110 |       | 150 | 0     | Open | ; |
| 29772               | 21191 |     | 21192 |      |   |
| 26.0501106467827    | 100   | 140 | 0     | Open | ; |
| 29773               | 18679 |     | 21474 |      |   |
| 26.1105696163822    | 160   | 150 | 0     | Open | ; |
| 29774               | 23090 |     | 23091 |      |   |
| 26.1194624381616    | 100   | 140 | 0     | Open | ; |
| 29775               | 22017 |     | 19302 |      |   |
| 26.1903064526246    | 110   | 150 | 0     | Open | ; |
| 29776               | 19739 |     | 19740 |      |   |
| 26.1950032165217    | 110   | 150 | 0     | Open | ; |
| 29777               | 20234 |     | 23887 |      |   |
| 26.2216653792028    | 125   | 140 | 0     | Open | ; |
| 29778               | 21608 |     | 21609 |      |   |
| 26.2217672422973    | 150   | 140 | 0     | Open | ; |
| 29779               | 18662 |     | 22080 |      |   |
| 26.2343795853087    | 110   | 150 | 0     | Open | ; |
| 29780               | 24177 |     | 22206 |      |   |
| 35.8183177166811    | 200   | 150 | 0     | Open | ; |
| 29781               | 23282 |     | 19467 |      |   |
| 26.2817392274535    | 125   | 150 | 0     | Open | ; |
| 29782               | 20901 |     | 24944 |      |   |
| 26.2860859598128    | 100   | 100 | 0     | Open | ; |
| 29783               | 24870 |     | 24871 |      |   |
| 26.2887151218612    | 200   | 150 | 0     | Open | ; |
| 29784               | 24809 |     | 24921 |      |   |
| 26.3119997481385    | 110   | 150 | 0     | Open | ; |
| 29785               | 20942 |     | 22475 |      |   |
| 26.3898497455562    | 200   | 150 | 0     | Open | ; |
| 29786               | 23539 |     | 23540 |      |   |
| 26.3354429030344    | 100   | 140 | 0     | Open | ; |
| 29787               | 18842 |     | 19810 |      |   |
| 26.3666270769539    | 75    | 150 | 0     | Open | ; |
| 29788               | 22431 |     | 22432 |      |   |
| 26.3683634125206    | 75    | 150 | 0     | Open | ; |
| 29789               | 22067 |     | 25025 |      |   |
| 26.4225845421596    | 110   | 150 | 0     | Open | ; |
| 29790               | 19292 |     | 19293 |      |   |
| 26.434547790663 75  |       | 140 | 0     | Open | ; |
| 29792               | 21515 |     | 24516 |      |   |
| 26.4523898607514    | 110   | 150 | 0     | Open | ; |
| 29793               | 21077 |     | 21069 |      |   |
| 26.4887496833155    | 160   | 150 | 0     | Open | ; |
| 29794               | 19089 |     | 19087 |      |   |
| 26.5420677246876    | 125   | 150 | 0     | Open | ; |
| 29795               | 23498 |     | 21323 |      |   |

|                  |       |     |       |      |   |
|------------------|-------|-----|-------|------|---|
| 26.5670898445877 | 110   | 150 | 0     | Open | ; |
| 29796            | 24700 |     | 23166 |      |   |
| 26.5793112207783 | 110   | 150 | 0     | Open | ; |
| 29797            | 24456 |     | 24454 |      |   |
| 26.621138959698  | 110   | 150 | 0     | Open | ; |
| 29798            | 23159 |     | 23160 |      |   |
| 26.6357321290019 | 110   | 150 | 0     | Open | ; |
| 29799            | 19587 |     | 19590 |      |   |
| 26.6446791505971 | 110   | 150 | 0     | Open | ; |
| 29800            | 21993 |     | 21994 |      |   |
| 26.652345216954  | 125   | 150 | 0     | Open | ; |
| 29801            | 23343 |     | 23344 |      |   |
| 26.6530766322784 | 110   | 150 | 0     | Open | ; |
| 29802            | 23629 |     | 19033 |      |   |
| 26.6607218173812 | 125   | 140 | 0     | Open | ; |
| 29803            | 24820 |     | 24821 |      |   |
| 26.6649886798575 | 160   | 150 | 0     | Open | ; |
| 29804            | 21054 |     | 20609 |      |   |
| 26.7212484763962 | 110   | 150 | 0     | Open | ; |
| 29805            | 18811 |     | 18812 |      |   |
| 26.7550808563683 | 110   | 150 | 0     | Open | ; |
| 29806            | 21329 |     | 21327 |      |   |
| 26.8064431658508 | 125   | 140 | 0     | Open | ; |
| 29807            | 24896 |     | 24897 |      |   |
| 26.8164625726262 | 100   | 140 | 0     | Open | ; |
| 29808            | 21511 |     | 21507 |      |   |
| 26.826280305961  | 110   | 150 | 0     | Open | ; |
| 29809            | 24462 |     | 24465 |      |   |
| 26.867296042704  | 110   | 150 | 0     | Open | ; |
| 29810            | 19083 |     | 19084 |      |   |
| 26.8589597872036 | 75    | 150 | 0     | Open | ; |
| 29811            | 19839 |     | 21208 |      |   |
| 26.8993323281065 | 75    | 140 | 0     | Open | ; |
| 29812            | 22858 |     | 22859 |      |   |
| 26.9266715847501 | 75    | 140 | 0     | Open | ; |
| 29813            | 21509 |     | 21545 |      |   |
| 26.9530149073415 | 110   | 150 | 0     | Open | ; |
| 29814            | 24987 |     | 24079 |      |   |
| 26.9586560436859 | 110   | 150 | 0     | Open | ; |
| 29815            | 22807 |     | 21466 |      |   |
| 26.9980252760508 | 200   | 150 | 0     | Open | ; |
| 29816            | 19300 |     | 19298 |      |   |
| 26.9985194667704 | 160   | 150 | 0     | Open | ; |
| 29817            | 20983 |     | 18737 |      |   |
| 26.998571616048  | 125   | 150 | 0     | Open | ; |
| 29818            | 18518 |     | 19923 |      |   |
| 27.0143287179571 | 110   | 150 | 0     | Open | ; |
| 29819            | 20240 |     | 20539 |      |   |
| 27.0352754460354 | 200   | 150 | 0     | Open | ; |
| 29820            | 23982 |     | 23310 |      |   |

|                  |       |     |       |      |   |
|------------------|-------|-----|-------|------|---|
| 27.0556634600536 | 125   | 150 | 0     | Open | ; |
| 29821            | 19765 |     | 19766 |      |   |
| 27.0778620874735 | 125   | 150 | 0     | Open | ; |
| 29822            | 21551 |     | 21552 |      |   |
| 27.0835089970343 | 110   | 150 | 0     | Open | ; |
| 29823            | 22311 |     | 22308 |      |   |
| 27.1015594443786 | 110   | 150 | 0     | Open | ; |
| 29824            | 22146 |     | 22147 |      |   |
| 27.1131691758285 | 125   | 150 | 0     | Open | ; |
| 29825            | 20077 |     | 22620 |      |   |
| 27.1229877681109 | 160   | 150 | 0     | Open | ; |
| 29826            | 22078 |     | 22079 |      |   |
| 27.1299739930299 | 110   | 150 | 0     | Open | ; |
| 29827            | 19718 |     | 24134 |      |   |
| 27.1526212221586 | 250   | 140 | 0     | Open | ; |
| 29828            | 21660 |     | 21661 |      |   |
| 32.7855655642559 | 75    | 150 | 0     | Open | ; |
| 29829            | 18850 |     | 23703 |      |   |
| 27.2195712669476 | 110   | 150 | 0     | Open | ; |
| 29830            | 20391 |     | 20388 |      |   |
| 27.2345288463747 | 125   | 150 | 0     | Open | ; |
| 29831            | 19922 |     | 19857 |      |   |
| 27.2463260735207 | 160   | 150 | 0     | Open | ; |
| 29832            | 19227 |     | 19228 |      |   |
| 27.2474405930536 | 110   | 150 | 0     | Open | ; |
| 29833            | 20658 |     | 20956 |      |   |
| 27.2612870142845 | 110   | 150 | 0     | Open | ; |
| 29834            | 20242 |     | 19581 |      |   |
| 27.2912002152218 | 125   | 150 | 0     | Open | ; |
| 29835            | 23832 |     | 23833 |      |   |
| 27.3168981433391 | 100   | 140 | 0     | Open | ; |
| 29836            | 20628 |     | 20629 |      |   |
| 27.3183688984914 | 110   | 150 | 0     | Open | ; |
| 29837            | 24396 |     | 24395 |      |   |
| 27.3268734986707 | 75    | 150 | 0     | Open | ; |
| 29838            | 22511 |     | 19211 |      |   |
| 27.3388930738547 | 110   | 150 | 0     | Open | ; |
| 29839            | 20558 |     | 21611 |      |   |
| 27.3515515049731 | 75    | 150 | 0     | Open | ; |
| 29840            | 20091 |     | 24964 |      |   |
| 27.4283884272435 | 200   | 150 | 0     | Open | ; |
| 29841            | 19140 |     | 22804 |      |   |
| 27.4345916872262 | 125   | 150 | 0     | Open | ; |
| 29842            | 18763 |     | 21774 |      |   |
| 27.4634371104016 | 250   | 100 | 0     | Open | ; |
| 29843            | 23657 |     | 19301 |      |   |
| 27.4805509713842 | 110   | 150 | 0     | Open | ; |
| 29844            | 22859 |     | 24316 |      |   |
| 27.4901674141533 | 75    | 140 | 0     | Open | ; |
| 29845            | 19600 |     | 19601 |      |   |

|                  |       |     |       |      |   |
|------------------|-------|-----|-------|------|---|
| 27.4982857827279 | 140   | 150 | 0     | Open | ; |
| 29846            | 20320 |     | 20464 |      |   |
| 27.4983043539659 | 140   | 150 | 0     | Open | ; |
| 29847            | 19155 |     | 19156 |      |   |
| 27.4999246336411 | 100   | 140 | 0     | Open | ; |
| 29848            | 19534 |     | 23064 |      |   |
| 27.5033029845605 | 110   | 150 | 0     | Open | ; |
| 29849            | 22091 |     | 19591 |      |   |
| 27.5100314378701 | 110   | 150 | 0     | Open | ; |
| 29850            | 18908 |     | 19466 |      |   |
| 27.5196621536473 | 110   | 150 | 0     | Open | ; |
| 29851            | 20783 |     | 20784 |      |   |
| 27.5661008249324 | 110   | 150 | 0     | Open | ; |
| 29852            | 22311 |     | 22309 |      |   |
| 27.5719220182245 | 110   | 150 | 0     | Open | ; |
| 29853            | 22312 |     | 22313 |      |   |
| 27.5761282082523 | 110   | 150 | 0     | Open | ; |
| 29854            | 22717 |     | 20963 |      |   |
| 27.6112305211175 | 110   | 150 | 0     | Open | ; |
| 29855            | 25020 |     | 18596 |      |   |
| 30.0416355209118 | 140   | 150 | 0     | Open | ; |
| 29856            | 24423 |     | 24415 |      |   |
| 27.6356286045036 | 75    | 150 | 0     | Open | ; |
| 29857            | 19245 |     | 19498 |      |   |
| 27.6502881945507 | 100   | 100 | 0     | Open | ; |
| 29858            | 23617 |     | 23682 |      |   |
| 27.6515235960076 | 75    | 150 | 0     | Open | ; |
| 29859            | 20075 |     | 22617 |      |   |
| 27.7412834990982 | 110   | 150 | 0     | Open | ; |
| 29860            | 21503 |     | 21395 |      |   |
| 27.7868640101187 | 100   | 140 | 0     | Open | ; |
| 29861            | 24966 |     | 23319 |      |   |
| 29.7776847461811 | 100   | 150 | 0     | Open | ; |
| 29862            | 23481 |     | 21180 |      |   |
| 27.8289790321548 | 110   | 150 | 0     | Open | ; |
| 29863            | 21550 |     | 18907 |      |   |
| 31.9981212033641 | 160   | 150 | 0     | Open | ; |
| 29864            | 24496 |     | 24493 |      |   |
| 33.0330778151498 | 110   | 150 | 0     | Open | ; |
| 29865            | 18999 |     | 23009 |      |   |
| 27.8708132168619 | 125   | 140 | 0     | Open | ; |
| 29866            | 22260 |     | 22219 |      |   |
| 27.8827123737089 | 110   | 150 | 0     | Open | ; |
| 29868            | 24731 |     | 24732 |      |   |
| 27.9230687289808 | 110   | 150 | 0     | Open | ; |
| 29869            | 24623 |     | 24610 |      |   |
| 27.9495355599102 | 110   | 150 | 0     | Open | ; |
| 29870            | 20678 |     | 22257 |      |   |
| 27.9633203072798 | 110   | 150 | 0     | Open | ; |
| 29871            | 23136 |     | 23137 |      |   |

|                     |       |     |       |      |   |
|---------------------|-------|-----|-------|------|---|
| 27.9904448875909    | 100   | 140 | 0     | Open | ; |
| 29872               | 24184 |     | 24958 |      |   |
| 27.9955794459768    | 75    | 140 | 0     | Open | ; |
| 29873               | 18564 |     | 18566 |      |   |
| 27.9981255022499    | 75    | 150 | 0     | Open | ; |
| 29874               | 20495 |     | 23068 |      |   |
| 27.9981848565083    | 75    | 150 | 0     | Open | ; |
| 29875               | 19333 |     | 19334 |      |   |
| 27.9982002353993    | 75    | 150 | 0     | Open | ; |
| 29876               | 18841 |     | 23347 |      |   |
| 27.9982528595983    | 75    | 150 | 0     | Open | ; |
| 29877               | 23118 |     | 23119 |      |   |
| 27.9982533176211    | 125   | 100 | 0     | Open | ; |
| 29878               | 19995 |     | 19996 |      |   |
| 27.9982726897893    | 125   | 150 | 0     | Open | ; |
| 29879               | 22518 |     | 23938 |      |   |
| 27.9982730929152    | 75    | 140 | 0     | Open | ; |
| 29880               | 19492 |     | 19493 |      |   |
| 27.9983099660099    | 100   | 140 | 0     | Open | ; |
| 29881               | 19375 |     | 19376 |      |   |
| 27.9983380500232    | 75    | 140 | 0     | Open | ; |
| 29882               | 19170 |     | 19171 |      |   |
| 27.9983462424653    | 75    | 140 | 0     | Open | ; |
| 29883               | 22965 |     | 23973 |      |   |
| 27.998359328541 75  |       | 150 | 0     | Open | ; |
| 29884               | 19166 |     | 19167 |      |   |
| 27.9983631825979    | 75    | 140 | 0     | Open | ; |
| 29885               | 21162 |     | 20983 |      |   |
| 27.9984037850375    | 125   | 150 | 0     | Open | ; |
| 29886               | 19589 |     | 22641 |      |   |
| 27.9984087107417    | 160   | 150 | 0     | Open | ; |
| 29887               | 23552 |     | 18497 |      |   |
| 27.9984320683048    | 110   | 150 | 0     | Open | ; |
| 29888               | 22408 |     | 22409 |      |   |
| 27.9984394076854    | 75    | 150 | 0     | Open | ; |
| 29889               | 23772 |     | 23779 |      |   |
| 27.9985184164649    | 100   | 140 | 0     | Open | ; |
| 29891               | 19168 |     | 19169 |      |   |
| 28.0013396570719    | 75    | 140 | 0     | Open | ; |
| 29892               | 22788 |     | 23016 |      |   |
| 28.002206970209 75  |       | 150 | 0     | Open | ; |
| 29893               | 20228 |     | 20289 |      |   |
| 28.043118988224 110 |       | 150 | 0     | Open | ; |
| 29894               | 18571 |     | 18572 |      |   |
| 28.0909411797331    | 110   | 150 | 0     | Open | ; |
| 29895               | 22902 |     | 22903 |      |   |
| 28.1367914816417    | 75    | 140 | 0     | Open | ; |
| 29897               | 21835 |     | 20647 |      |   |
| 28.184885162444 75  |       | 140 | 0     | Open | ; |
| 29898               | 19705 |     | 19706 |      |   |



|                     |       |     |       |      |   |
|---------------------|-------|-----|-------|------|---|
| 28.1903168416832    | 125   | 150 | 0     | Open | ; |
| 29899               | 22706 |     | 22476 |      |   |
| 28.2353823767151    | 200   | 150 | 0     | Open | ; |
| 29900               | 23189 |     | 23172 |      |   |
| 28.2449412294942    | 110   | 150 | 0     | Open | ; |
| 29901               | 24621 |     | 24622 |      |   |
| 28.2515164677532    | 160   | 150 | 0     | Open | ; |
| 29902               | 21629 |     | 21826 |      |   |
| 28.2537375205913    | 200   | 150 | 0     | Open | ; |
| 29903               | 18704 |     | 21357 |      |   |
| 28.2623021015269    | 110   | 150 | 0     | Open | ; |
| 29904               | 22245 |     | 18867 |      |   |
| 28.263557404159 75  |       | 140 | 0     | Open | ; |
| 29905               | 22253 |     | 23351 |      |   |
| 28.2918188175006    | 110   | 150 | 0     | Open | ; |
| 29906               | 19613 |     | 19616 |      |   |
| 28.35274950507 125  |       | 150 | 0     | Open | ; |
| 29907               | 23484 |     | 23485 |      |   |
| 28.3679155514047    | 100   | 140 | 0     | Open | ; |
| 29908               | 19345 |     | 21404 |      |   |
| 28.420228047812 100 |       | 140 | 0     | Open | ; |
| 29909               | 23881 |     | 23066 |      |   |
| 28.4960183853446    | 160   | 150 | 0     | Open | ; |
| 29910               | 20127 |     | 23201 |      |   |
| 28.4960432937183    | 160   | 150 | 0     | Open | ; |
| 29911               | 19611 |     | 19139 |      |   |
| 28.4981512787116    | 125   | 150 | 0     | Open | ; |
| 29912               | 21996 |     | 21997 |      |   |
| 28.5161536711942    | 75    | 150 | 0     | Open | ; |
| 29913               | 19712 |     | 20187 |      |   |
| 28.5659789041293    | 300   | 140 | 0     | Open | ; |
| 29914               | 21087 |     | 21300 |      |   |
| 28.6044011200013    | 200   | 150 | 0     | Open | ; |
| 29915               | 19060 |     | 21122 |      |   |
| 28.6157069125201    | 140   | 150 | 0     | Open | ; |
| 29916               | 24785 |     | 24761 |      |   |
| 28.6185696672935    | 160   | 150 | 0     | Open | ; |
| 29917               | 21615 |     | 21616 |      |   |
| 28.6766788320739    | 110   | 150 | 0     | Open | ; |
| 29918               | 19027 |     | 19813 |      |   |
| 34.968584058445 100 |       | 140 | 0     | Open | ; |
| 29919               | 21360 |     | 22686 |      |   |
| 28.6863038817753    | 75    | 140 | 0     | Open | ; |
| 29920               | 19143 |     | 20630 |      |   |
| 28.7326355840277    | 110   | 150 | 0     | Open | ; |
| 29921               | 19305 |     | 19306 |      |   |
| 28.7634943958917    | 125   | 150 | 0     | Open | ; |
| 29922               | 24606 |     | 24607 |      |   |
| 28.7997563010971    | 200   | 150 | 0     | Open | ; |
| 29923               | 24624 |     | 24579 |      |   |

|                  |       |     |       |      |   |
|------------------|-------|-----|-------|------|---|
| 28.8078324618218 | 110   | 150 | 0     | Open | ; |
| 29924            | 22683 |     | 22682 |      |   |
| 36.8699082912498 | 110   | 150 | 0     | Open | ; |
| 29925            | 24761 |     | 24762 |      |   |
| 28.8168235375093 | 110   | 150 | 0     | Open | ; |
| 29926            | 21542 |     | 23498 |      |   |
| 28.8492530360793 | 110   | 150 | 0     | Open | ; |
| 29927            | 22382 |     | 18568 |      |   |
| 28.8764504344936 | 110   | 150 | 0     | Open | ; |
| 29928            | 23749 |     | 24110 |      |   |
| 34.3524375154343 | 450   | 100 | 0     | Open | ; |
| 29929            | 23856 |     | 24039 |      |   |
| 28.9108657469282 | 125   | 150 | 0     | Open | ; |
| 29930            | 21839 |     | 24497 |      |   |
| 29.8153270831393 | 110   | 150 | 0     | Open | ; |
| 29931            | 19700 |     | 19701 |      |   |
| 28.9270852463197 | 100   | 140 | 0     | Open | ; |
| 29932            | 24763 |     | 24774 |      |   |
| 28.9447281529803 | 160   | 150 | 0     | Open | ; |
| 29933            | 23180 |     | 23181 |      |   |
| 28.9726156029004 | 110   | 150 | 0     | Open | ; |
| 29934            | 21356 |     | 21354 |      |   |
| 150.960117747077 | 110   | 150 | 0     | Open | ; |
| 29935            | 21356 |     | 21354 |      |   |
| 28.9847722014275 | 110   | 150 | 0     | Open | ; |
| 29936            | 18785 |     | 18724 |      |   |
| 28.9935417703326 | 110   | 150 | 0     | Open | ; |
| 29937            | 19148 |     | 19149 |      |   |
| 28.9945552794762 | 75    | 140 | 0     | Open | ; |
| 29938            | 23652 |     | 19655 |      |   |
| 28.9985402783637 | 100   | 140 | 0     | Open | ; |
| 29939            | 21249 |     | 21455 |      |   |
| 28.9970924559386 | 110   | 150 | 0     | Open | ; |
| 29940            | 19548 |     | 23797 |      |   |
| 28.9982752987683 | 110   | 150 | 0     | Open | ; |
| 29941            | 22406 |     | 20557 |      |   |
| 28.9983276151894 | 110   | 150 | 0     | Open | ; |
| 29942            | 20725 |     | 22957 |      |   |
| 28.9983359588552 | 110   | 150 | 0     | Open | ; |
| 29943            | 20066 |     | 20067 |      |   |
| 28.9983427278396 | 75    | 140 | 0     | Open | ; |
| 29944            | 21834 |     | 19982 |      |   |
| 28.9983677880757 | 75    | 140 | 0     | Open | ; |
| 29945            | 19150 |     | 19151 |      |   |
| 28.9983713239505 | 75    | 140 | 0     | Open | ; |
| 29946            | 19312 |     | 19313 |      |   |
| 28.9986735021567 | 160   | 150 | 0     | Open | ; |
| 29947            | 20964 |     | 23436 |      |   |
| 29.0068179312151 | 75    | 150 | 0     | Open | ; |
| 29948            | 24903 |     | 20282 |      |   |

|                  |       |     |       |      |   |
|------------------|-------|-----|-------|------|---|
| 29.0520616854947 | 110   | 150 | 0     | Open | ; |
| 29949            | 24612 |     | 24631 |      |   |
| 29.0684762285773 | 110   | 150 | 0     | Open | ; |
| 29950            | 19352 |     | 19353 |      |   |
| 29.1353513189488 | 110   | 150 | 0     | Open | ; |
| 29951            | 21136 |     | 18826 |      |   |
| 29.1540064794869 | 110   | 150 | 0     | Open | ; |
| 29952            | 20870 |     | 20787 |      |   |
| 29.8915484434102 | 75    | 150 | 0     | Open | ; |
| 29953            | 19226 |     | 19981 |      |   |
| 29.2516275300132 | 110   | 150 | 0     | Open | ; |
| 29954            | 20654 |     | 20656 |      |   |
| 29.2611731553957 | 110   | 150 | 0     | Open | ; |
| 29955            | 21852 |     | 21864 |      |   |
| 29.298238312519  | 140   | 150 | 0     | Open | ; |
| 29956            | 22328 |     | 22327 |      |   |
| 29.2983386001982 | 110   | 150 | 0     | Open | ; |
| 29957            | 22142 |     | 22143 |      |   |
| 29.3020117778549 | 110   | 150 | 0     | Open | ; |
| 29958            | 23675 |     | 22808 |      |   |
| 29.3350879412152 | 200   | 150 | 0     | Open | ; |
| 29959            | 23039 |     | 23040 |      |   |
| 29.3774484356809 | 300   | 140 | 0     | Open | ; |
| 29960            | 24612 |     | 24613 |      |   |
| 29.4331079250939 | 110   | 150 | 0     | Open | ; |
| 29961            | 20684 |     | 23473 |      |   |
| 29.4383245070805 | 110   | 150 | 0     | Open | ; |
| 29962            | 19449 |     | 19450 |      |   |
| 29.4591323896917 | 75    | 150 | 0     | Open | ; |
| 29963            | 23910 |     | 23997 |      |   |
| 29.4598257244446 | 75    | 140 | 0     | Open | ; |
| 29964            | 24394 |     | 24395 |      |   |
| 29.4833000170503 | 160   | 150 | 0     | Open | ; |
| 29965            | 21112 |     | 21113 |      |   |
| 29.4906999132098 | 110   | 150 | 0     | Open | ; |
| 29966            | 23737 |     | 20813 |      |   |
| 29.4983101726667 | 110   | 150 | 0     | Open | ; |
| 29967            | 21355 |     | 21353 |      |   |
| 29.5182243273367 | 110   | 150 | 0     | Open | ; |
| 29968            | 24299 |     | 24233 |      |   |
| 29.540073288295  | 150   | 140 | 0     | Open | ; |
| 29969            | 23482 |     | 23939 |      |   |
| 29.5416962144091 | 100   | 140 | 0     | Open | ; |
| 29970            | 20188 |     | 23641 |      |   |
| 29.6018116108326 | 100   | 140 | 0     | Open | ; |
| 29971            | 21129 |     | 23091 |      |   |
| 38.4239235997348 | 100   | 140 | 0     | Open | ; |
| 29972            | 22972 |     | 23557 |      |   |
| 29.6721655451217 | 100   | 140 | 0     | Open | ; |
| 29973            | 22883 |     | 22884 |      |   |

|                     |       |     |       |  |      |   |
|---------------------|-------|-----|-------|--|------|---|
| 29.6745806941368    | 75    | 150 | 0     |  | Open | ; |
| 29974               | 19500 |     | 22121 |  |      |   |
| 29.693931619318 100 |       | 140 | 0     |  | Open | ; |
| 29975               | 21856 |     | 21857 |  |      |   |
| 29.6983032206944    | 100   | 100 | 0     |  | Open | ; |
| 29976               | 23998 |     | 20386 |  |      |   |
| 29.7282465339522    | 125   | 150 | 0     |  | Open | ; |
| 29977               | 22294 |     | 22295 |  |      |   |
| 29.7386476634476    | 110   | 150 | 0     |  | Open | ; |
| 29978               | 20739 |     | 20740 |  |      |   |
| 29.7495595240509    | 110   | 150 | 0     |  | Open | ; |
| 29979               | 21457 |     | 24227 |  |      |   |
| 29.7607714344139    | 110   | 150 | 0     |  | Open | ; |
| 29980               | 19496 |     | 19497 |  |      |   |
| 29.7679324875712    | 75    | 150 | 0     |  | Open | ; |
| 29981               | 24676 |     | 24679 |  |      |   |
| 29.7752321635818    | 110   | 150 | 0     |  | Open | ; |
| 29983               | 24890 |     | 24450 |  |      |   |
| 39.5134623183226    | 110   | 150 | 0     |  | Open | ; |
| 29984               | 23954 |     | 23447 |  |      |   |
| 29.8168593603656    | 150   | 140 | 0     |  | Open | ; |
| 29985               | 18577 |     | 18578 |  |      |   |
| 29.8257530136952    | 110   | 150 | 0     |  | Open | ; |
| 29986               | 22465 |     | 22500 |  |      |   |
| 29.8291553619818    | 110   | 150 | 0     |  | Open | ; |
| 29987               | 21936 |     | 22168 |  |      |   |
| 29.8839314688469    | 125   | 150 | 0     |  | Open | ; |
| 29988               | 24765 |     | 24753 |  |      |   |
| 29.9350242613395    | 110   | 150 | 0     |  | Open | ; |
| 29989               | 19899 |     | 24267 |  |      |   |
| 43.7172169270576    | 75    | 150 | 0     |  | Open | ; |
| 29990               | 21537 |     | 19067 |  |      |   |
| 29.984844182794 110 |       | 150 | 0     |  | Open | ; |
| 29991               | 22951 |     | 23691 |  |      |   |
| 29.9940587822004    | 200   | 150 | 0     |  | Open | ; |
| 29992               | 21477 |     | 21478 |  |      |   |
| 29.9965134681205    | 75    | 150 | 0     |  | Open | ; |
| 29993               | 23533 |     | 23534 |  |      |   |
| 29.9968817498215    | 75    | 140 | 0     |  | Open | ; |
| 29994               | 21383 |     | 21382 |  |      |   |
| 29.9982776841196    | 100   | 140 | 0     |  | Open | ; |
| 29995               | 22297 |     | 22379 |  |      |   |
| 29.9977060202191    | 100   | 140 | 0     |  | Open | ; |
| 29996               | 22701 |     | 22702 |  |      |   |
| 29.9982401618007    | 110   | 150 | 0     |  | Open | ; |
| 29997               | 23233 |     | 23234 |  |      |   |
| 29.9982591129044    | 75    | 150 | 0     |  | Open | ; |
| 29998               | 20099 |     | 20100 |  |      |   |
| 29.998269973409 200 |       | 150 | 0     |  | Open | ; |
| 29999               | 20567 |     | 20266 |  |      |   |

|                     |       |     |       |      |   |
|---------------------|-------|-----|-------|------|---|
| 29.9982754836952    | 250   | 140 | 0     | Open | ; |
| 30000               | 20097 |     | 20098 |      |   |
| 29.9983088843701    | 200   | 150 | 0     | Open | ; |
| 30001               | 21832 |     | 21833 |      |   |
| 29.998314033158 75  |       | 140 | 0     | Open | ; |
| 30002               | 20639 |     | 20448 |      |   |
| 29.9983266582032    | 160   | 150 | 0     | Open | ; |
| 30003               | 19229 |     | 19231 |      |   |
| 29.9983356025457    | 75    | 150 | 0     | Open | ; |
| 30004               | 18511 |     | 18513 |      |   |
| 29.9983382936892    | 450   | 100 | 0     | Open | ; |
| 30005               | 19888 |     | 20093 |      |   |
| 29.9983396745292    | 200   | 150 | 0     | Open | ; |
| 30006               | 24962 |     | 25145 |      |   |
| 29.9983493576067    | 75    | 140 | 0     | Open | ; |
| 30007               | 20091 |     | 20092 |      |   |
| 29.9983592366636    | 200   | 150 | 0     | Open | ; |
| 30008               | 20360 |     | 23650 |      |   |
| 29.998368970004 100 |       | 140 | 0     | Open | ; |
| 30009               | 19357 |     | 19358 |      |   |
| 29.9983724040226    | 100   | 140 | 0     | Open | ; |
| 30010               | 19503 |     | 19719 |      |   |
| 29.9985713566449    | 110   | 150 | 0     | Open | ; |
| 30011               | 22669 |     | 23582 |      |   |
| 29.9992803394416    | 100   | 140 | 0     | Open | ; |
| 30012               | 22377 |     | 22378 |      |   |
| 29.9997790161754    | 200   | 150 | 0     | Open | ; |
| 30013               | 19747 |     | 19748 |      |   |
| 29.9998799486216    | 75    | 140 | 0     | Open | ; |
| 30014               | 24659 |     | 24771 |      |   |
| 29.9999902314545    | 75    | 150 | 0     | Open | ; |
| 30015               | 20951 |     | 23211 |      |   |
| 30.0000504362356    | 75    | 150 | 0     | Open | ; |
| 30016               | 23306 |     | 20737 |      |   |
| 30.0009391113611    | 100   | 100 | 0     | Open | ; |
| 30017               | 21317 |     | 21392 |      |   |
| 30.0018048085731    | 75    | 140 | 0     | Open | ; |
| 30018               | 22787 |     | 23017 |      |   |
| 30.0411574463999    | 110   | 150 | 0     | Open | ; |
| 30019               | 24500 |     | 24632 |      |   |
| 30.047347132137 160 |       | 150 | 0     | Open | ; |
| 30020               | 23892 |     | 20499 |      |   |
| 30.125215119791 75  |       | 140 | 0     | Open | ; |
| 30021               | 19729 |     | 21085 |      |   |
| 30.1898723524252    | 110   | 150 | 0     | Open | ; |
| 30022               | 23952 |     | 19178 |      |   |
| 30.1902176374423    | 75    | 140 | 0     | Open | ; |
| 30023               | 24550 |     | 22877 |      |   |
| 30.2486706260157    | 200   | 150 | 0     | Open | ; |
| 30024               | 22243 |     | 22244 |      |   |

|                     |       |     |       |      |   |
|---------------------|-------|-----|-------|------|---|
| 28.7637817422767    | 110   | 150 | 0     | Open | ; |
| 30025               | 24790 |     | 24755 |      |   |
| 30.3053128891632    | 110   | 150 | 0     | Open | ; |
| 30026               | 23283 |     | 23284 |      |   |
| 30.3918065607577    | 125   | 140 | 0     | Open | ; |
| 30027               | 20961 |     | 21646 |      |   |
| 30.3931884465151    | 200   | 140 | 0     | Open | ; |
| 30028               | 24906 |     | 24905 |      |   |
| 30.3934508685962    | 160   | 150 | 0     | Open | ; |
| 30029               | 23969 |     | 21037 |      |   |
| 30.401179507887 110 |       | 150 | 0     | Open | ; |
| 30030               | 20335 |     | 21900 |      |   |
| 30.4179669600073    | 200   | 150 | 0     | Open | ; |
| 30031               | 24466 |     | 24464 |      |   |
| 30.4383449150551    | 110   | 150 | 0     | Open | ; |
| 30032               | 23314 |     | 23315 |      |   |
| 30.4610231383841    | 125   | 150 | 0     | Open | ; |
| 30033               | 24205 |     | 24203 |      |   |
| 30.4666756060858    | 100   | 136 | 0     | Open | ; |
| 30034               | 19510 |     | 21778 |      |   |
| 30.4920788160045    | 125   | 150 | 0     | Open | ; |
| 30035               | 21878 |     | 21879 |      |   |
| 30.4982080581649    | 160   | 150 | 0     | Open | ; |
| 30036               | 24578 |     | 24626 |      |   |
| 30.500795003077 110 |       | 150 | 0     | Open | ; |
| 30037               | 21384 |     | 21385 |      |   |
| 30.5502090888407    | 160   | 150 | 0     | Open | ; |
| 30038               | 19201 |     | 21059 |      |   |
| 30.5676274673821    | 75    | 150 | 0     | Open | ; |
| 30039               | 21697 |     | 21353 |      |   |
| 30.5765190277587    | 110   | 150 | 0     | Open | ; |
| 30040               | 22067 |     | 22068 |      |   |
| 30.64286655534 110  |       | 150 | 0     | Open | ; |
| 30041               | 21008 |     | 21009 |      |   |
| 30.759825211662 125 |       | 140 | 0     | Open | ; |
| 30042               | 21953 |     | 21954 |      |   |
| 30.7795081035265    | 90    | 150 | 0     | Open | ; |
| 30043               | 24358 |     | 24970 |      |   |
| 31.8732954806912    | 75    | 150 | 0     | Open | ; |
| 30044               | 19233 |     | 19234 |      |   |
| 30.9232220975788    | 110   | 150 | 0     | Open | ; |
| 30045               | 20043 |     | 23895 |      |   |
| 30.9713186855792    | 75    | 150 | 0     | Open | ; |
| 30046               | 18959 |     | 19615 |      |   |
| 29.5552045908456    | 110   | 150 | 0     | Open | ; |
| 30047               | 19970 |     | 23298 |      |   |
| 30.9819233798221    | 140   | 150 | 0     | Open | ; |
| 30048               | 21182 |     | 21575 |      |   |
| 30.9935175508671    | 110   | 150 | 0     | Open | ; |
| 30049               | 20857 |     | 20182 |      |   |

|                     |       |     |       |      |   |
|---------------------|-------|-----|-------|------|---|
| 30.998021969502 110 |       | 150 | 0     | Open | ; |
| 30050               | 21925 |     | 21171 |      |   |
| 30.9980849979259    | 110   | 150 | 0     | Open | ; |
| 30051               | 18892 |     | 18895 |      |   |
| 30.9980948037209    | 140   | 150 | 0     | Open | ; |
| 30052               | 23192 |     | 23193 |      |   |
| 30.9981820002993    | 75    | 140 | 0     | Open | ; |
| 30053               | 20536 |     | 20537 |      |   |
| 30.998211635562 110 |       | 150 | 0     | Open | ; |
| 30054               | 19213 |     | 19215 |      |   |
| 30.9982225496139    | 160   | 150 | 0     | Open | ; |
| 30055               | 23284 |     | 20611 |      |   |
| 30.9982744423086    | 125   | 140 | 0     | Open | ; |
| 30056               | 22513 |     | 19680 |      |   |
| 30.9983050023681    | 160   | 150 | 0     | Open | ; |
| 30057               | 23035 |     | 21691 |      |   |
| 30.9983214285298    | 110   | 150 | 0     | Open | ; |
| 30058               | 24818 |     | 24820 |      |   |
| 30.9987156164256    | 160   | 150 | 0     | Open | ; |
| 30059               | 22423 |     | 22424 |      |   |
| 31.0000570169136    | 100   | 140 | 0     | Open | ; |
| 30060               | 19521 |     | 19522 |      |   |
| 31.000073113538 200 |       | 150 | 0     | Open | ; |
| 30061               | 21250 |     | 21251 |      |   |
| 31.0675734625372    | 160   | 150 | 0     | Open | ; |
| 30062               | 23606 |     | 23607 |      |   |
| 31.0841439041436    | 75    | 150 | 0     | Open | ; |
| 30063               | 22421 |     | 22422 |      |   |
| 31.0921720762823    | 100   | 140 | 0     | Open | ; |
| 30064               | 24434 |     | 24710 |      |   |
| 31.1765789409255    | 110   | 150 | 0     | Open | ; |
| 30065               | 24712 |     | 24713 |      |   |
| 31.186673605111 75  |       | 150 | 0     | Open | ; |
| 30066               | 21123 |     | 19054 |      |   |
| 31.1897559711299    | 140   | 150 | 0     | Open | ; |
| 30067               | 22085 |     | 22086 |      |   |
| 31.2015912176593    | 110   | 150 | 0     | Open | ; |
| 30068               | 21168 |     | 23382 |      |   |
| 31.2177570300865    | 110   | 150 | 0     | Open | ; |
| 30069               | 24639 |     | 24655 |      |   |
| 31.2665872027466    | 160   | 150 | 0     | Open | ; |
| 30070               | 24618 |     | 24577 |      |   |
| 31.2790945414331    | 110   | 150 | 0     | Open | ; |
| 30071               | 20317 |     | 21929 |      |   |
| 31.3074412785649    | 110   | 150 | 0     | Open | ; |
| 30072               | 19359 |     | 19360 |      |   |
| 31.308217994821 150 |       | 140 | 0     | Open | ; |
| 30073               | 20303 |     | 20304 |      |   |
| 31.3167994040639    | 100   | 140 | 0     | Open | ; |
| 30074               | 21252 |     | 21253 |      |   |

|                     |       |     |       |      |   |
|---------------------|-------|-----|-------|------|---|
| 31.3390830067202    | 140   | 150 | 0     | Open | ; |
| 30075               | 20569 |     | 20338 |      |   |
| 31.4143750936013    | 160   | 150 | 0     | Open | ; |
| 30076               | 21025 |     | 24016 |      |   |
| 31.4451132343393    | 110   | 150 | 0     | Open | ; |
| 30077               | 21026 |     | 24015 |      |   |
| 31.457490860581 110 |       | 150 | 0     | Open | ; |
| 30078               | 22914 |     | 23082 |      |   |
| 31.468479024284 125 |       | 140 | 0     | Open | ; |
| 30079               | 19698 |     | 18800 |      |   |
| 31.4963355746905    | 140   | 150 | 0     | Open | ; |
| 30080               | 21873 |     | 21874 |      |   |
| 31.504802682378 75  |       | 150 | 0     | Open | ; |
| 30081               | 23241 |     | 23536 |      |   |
| 31.5076012186143    | 110   | 150 | 0     | Open | ; |
| 30082               | 21459 |     | 18790 |      |   |
| 47.025985491582 110 |       | 150 | 0     | Open | ; |
| 30083               | 24020 |     | 23919 |      |   |
| 31.5157224629662    | 100   | 140 | 0     | Open | ; |
| 30084               | 19971 |     | 18733 |      |   |
| 31.5347989790549    | 140   | 150 | 0     | Open | ; |
| 30085               | 21809 |     | 21808 |      |   |
| 33.5005947518187    | 160   | 150 | 0     | Open | ; |
| 30086               | 22562 |     | 24523 |      |   |
| 31.5949003093366    | 110   | 150 | 0     | Open | ; |
| 30087               | 24794 |     | 24795 |      |   |
| 31.6000524063504    | 110   | 150 | 0     | Open | ; |
| 30088               | 24721 |     | 24722 |      |   |
| 31.6099915580566    | 110   | 150 | 0     | Open | ; |
| 30089               | 18792 |     | 18797 |      |   |
| 31.6415058317952    | 110   | 150 | 0     | Open | ; |
| 30090               | 24789 |     | 24765 |      |   |
| 31.6877215659402    | 110   | 150 | 0     | Open | ; |
| 30091               | 24792 |     | 24512 |      |   |
| 31.7059041491782    | 110   | 150 | 0     | Open | ; |
| 30092               | 22786 |     | 22888 |      |   |
| 31.7848597156878    | 110   | 150 | 0     | Open | ; |
| 30093               | 19266 |     | 21752 |      |   |
| 31.8221207694215    | 110   | 150 | 0     | Open | ; |
| 30094               | 18478 |     | 18479 |      |   |
| 31.8347294605733    | 300   | 140 | 0     | Open | ; |
| 30095               | 21058 |     | 21879 |      |   |
| 31.838206754811 160 |       | 150 | 0     | Open | ; |
| 30096               | 24843 |     | 24840 |      |   |
| 31.8481498469631    | 110   | 150 | 0     | Open | ; |
| 30097               | 20350 |     | 20839 |      |   |
| 31.8535111052284    | 140   | 150 | 0     | Open | ; |
| 30098               | 22101 |     | 22008 |      |   |
| 31.8647417690162    | 140   | 150 | 0     | Open | ; |
| 30099               | 21337 |     | 21338 |      |   |



|                  |       |     |       |      |   |
|------------------|-------|-----|-------|------|---|
| 31.8647960594176 | 110   | 150 | 0     | Open | ; |
| 30100            | 20285 |     | 20286 |      |   |
| 31.8660302361608 | 125   | 150 | 0     | Open | ; |
| 30101            | 24707 |     | 22532 |      |   |
| 31.909066126292  | 110   | 150 | 0     | Open | ; |
| 30102            | 23884 |     | 23953 |      |   |
| 31.9155764965705 | 150   | 140 | 0     | Open | ; |
| 30103            | 23283 |     | 19720 |      |   |
| 31.9231345490678 | 125   | 140 | 0     | Open | ; |
| 30104            | 18712 |     | 18713 |      |   |
| 31.9706940351519 | 110   | 150 | 0     | Open | ; |
| 30106            | 18704 |     | 18705 |      |   |
| 31.9895023265344 | 110   | 150 | 0     | Open | ; |
| 30107            | 22054 |     | 21679 |      |   |
| 31.9953481116495 | 140   | 150 | 0     | Open | ; |
| 30108            | 21134 |     | 21128 |      |   |
| 31.9969085757591 | 100   | 140 | 0     | Open | ; |
| 30109            | 21309 |     | 21562 |      |   |
| 31.9978883060749 | 110   | 150 | 0     | Open | ; |
| 30110            | 22087 |     | 22088 |      |   |
| 31.9980512880682 | 160   | 150 | 0     | Open | ; |
| 30111            | 18613 |     | 21696 |      |   |
| 31.9981438917789 | 140   | 150 | 0     | Open | ; |
| 30112            | 22819 |     | 22821 |      |   |
| 31.9981572779149 | 160   | 150 | 0     | Open | ; |
| 30113            | 22019 |     | 23576 |      |   |
| 31.9981772545256 | 100   | 140 | 0     | Open | ; |
| 30114            | 18671 |     | 20492 |      |   |
| 31.9982054623443 | 160   | 150 | 0     | Open | ; |
| 30115            | 23146 |     | 23147 |      |   |
| 31.9983161217257 | 75    | 140 | 0     | Open | ; |
| 30116            | 20067 |     | 19982 |      |   |
| 31.9991712789057 | 75    | 140 | 0     | Open | ; |
| 30117            | 23793 |     | 23794 |      |   |
| 31.9999199985341 | 75    | 140 | 0     | Open | ; |
| 30118            | 24769 |     | 24770 |      |   |
| 31.9999560640945 | 75    | 150 | 0     | Open | ; |
| 30119            | 21505 |     | 21506 |      |   |
| 32.0000140678019 | 110   | 150 | 0     | Open | ; |
| 30120            | 24514 |     | 24515 |      |   |
| 32.0000438516893 | 75    | 150 | 0     | Open | ; |
| 30121            | 21701 |     | 21702 |      |   |
| 32.0039023644206 | 110   | 150 | 0     | Open | ; |
| 30122            | 20399 |     | 22408 |      |   |
| 32.0046302104186 | 75    | 150 | 0     | Open | ; |
| 30123            | 23212 |     | 22595 |      |   |
| 32.008505686699  | 140   | 150 | 0     | Open | ; |
| 30124            | 18835 |     | 20756 |      |   |
| 32.0156729915335 | 160   | 150 | 0     | Open | ; |
| 30125            | 23135 |     | 22838 |      |   |

|                     |       |     |       |      |   |
|---------------------|-------|-----|-------|------|---|
| 32.0443074110994    | 150   | 140 | 0     | Open | ; |
| 30126               | 23843 |     | 23844 |      |   |
| 32.0506331810181    | 110   | 150 | 0     | Open | ; |
| 30127               | 20960 |     | 19622 |      |   |
| 32.0818997542374    | 110   | 150 | 0     | Open | ; |
| 30128               | 22479 |     | 19233 |      |   |
| 32.0942172645534    | 110   | 150 | 0     | Open | ; |
| 30129               | 24750 |     | 24737 |      |   |
| 32.1151079519356    | 110   | 150 | 0     | Open | ; |
| 30130               | 24400 |     | 24402 |      |   |
| 32.1313849774352    | 110   | 150 | 0     | Open | ; |
| 30131               | 20921 |     | 22375 |      |   |
| 32.1531915942903    | 140   | 150 | 0     | Open | ; |
| 30132               | 21653 |     | 19726 |      |   |
| 32.1614210110396    | 75    | 150 | 0     | Open | ; |
| 30133               | 22107 |     | 22639 |      |   |
| 32.182895005388 110 |       | 150 | 0     | Open | ; |
| 30134               | 24014 |     | 21390 |      |   |
| 32.1928337118587    | 110   | 150 | 0     | Open | ; |
| 30135               | 21296 |     | 21297 |      |   |
| 32.1948294079192    | 160   | 150 | 0     | Open | ; |
| 30136               | 19296 |     | 19297 |      |   |
| 32.2148149416107    | 140   | 150 | 0     | Open | ; |
| 30137               | 24617 |     | 24608 |      |   |
| 32.2437249289713    | 160   | 150 | 0     | Open | ; |
| 30138               | 21436 |     | 18997 |      |   |
| 32.2529503142458    | 125   | 140 | 0     | Open | ; |
| 30139               | 24720 |     | 24733 |      |   |
| 32.2782699742215    | 110   | 150 | 0     | Open | ; |
| 30140               | 24780 |     | 24790 |      |   |
| 32.3343548026723    | 110   | 150 | 0     | Open | ; |
| 30141               | 19135 |     | 19136 |      |   |
| 32.336051950995 75  |       | 140 | 0     | Open | ; |
| 30142               | 21502 |     | 18810 |      |   |
| 32.3476686316753    | 125   | 150 | 0     | Open | ; |
| 30143               | 18676 |     | 23635 |      |   |
| 39.9292122482759    | 125   | 150 | 0     | Open | ; |
| 30144               | 24427 |     | 24428 |      |   |
| 32.3969479909563    | 75    | 150 | 0     | Open | ; |
| 30145               | 23837 |     | 23838 |      |   |
| 32.4548566250997    | 125   | 150 | 0     | Open | ; |
| 30146               | 22329 |     | 18696 |      |   |
| 32.4675062041758    | 200   | 150 | 0     | Open | ; |
| 30147               | 19363 |     | 19279 |      |   |
| 32.4783859807419    | 150   | 140 | 0     | Open | ; |
| 30148               | 21343 |     | 21212 |      |   |
| 32.6265476880921    | 125   | 150 | 0     | Open | ; |
| 30149               | 19429 |     | 19430 |      |   |
| 32.652644790501 140 |       | 150 | 0     | Open | ; |
| 30151               | 19727 |     | 19728 |      |   |

|                     |       |     |       |      |   |
|---------------------|-------|-----|-------|------|---|
| 32.670610172674 75  |       | 150 | 0     | Open | ; |
| 30152               | 20074 |     | 20075 |      |   |
| 32.7002744889782    | 110   | 150 | 0     | Open | ; |
| 30153               | 24307 |     | 23601 |      |   |
| 34.6023308872999    | 160   | 150 | 0     | Open | ; |
| 30154               | 21346 |     | 21804 |      |   |
| 32.7456515217071    | 125   | 150 | 0     | Open | ; |
| 30155               | 24018 |     | 19938 |      |   |
| 32.7712837625727    | 110   | 150 | 0     | Open | ; |
| 30156               | 19801 |     | 19939 |      |   |
| 32.7794978136531    | 110   | 150 | 0     | Open | ; |
| 30157               | 20096 |     | 22693 |      |   |
| 32.8181549292021    | 200   | 150 | 0     | Open | ; |
| 30158               | 18985 |     | 19837 |      |   |
| 32.8858631415983    | 75    | 150 | 0     | Open | ; |
| 30159               | 22906 |     | 22342 |      |   |
| 32.8981771438621    | 75    | 140 | 0     | Open | ; |
| 30160               | 18813 |     | 18814 |      |   |
| 32.9107681995111    | 110   | 150 | 0     | Open | ; |
| 30161               | 23638 |     | 23982 |      |   |
| 32.9400403674146    | 125   | 150 | 0     | Open | ; |
| 30162               | 22942 |     | 22943 |      |   |
| 32.9543501477393    | 110   | 150 | 0     | Open | ; |
| 30163               | 19062 |     | 21703 |      |   |
| 32.960285402102 140 |       | 150 | 0     | Open | ; |
| 30164               | 19667 |     | 20358 |      |   |
| 32.9657690056047    | 160   | 150 | 0     | Open | ; |
| 30165               | 23224 |     | 23225 |      |   |
| 32.9716654894852    | 100   | 140 | 0     | Open | ; |
| 30166               | 20129 |     | 20130 |      |   |
| 32.9972542007451    | 160   | 150 | 0     | Open | ; |
| 30167               | 24043 |     | 22591 |      |   |
| 32.9976689758275    | 125   | 150 | 0     | Open | ; |
| 30168               | 22951 |     | 22952 |      |   |
| 32.9979701186088    | 200   | 150 | 0     | Open | ; |
| 30169               | 23045 |     | 23046 |      |   |
| 32.9979731156572    | 75    | 140 | 0     | Open | ; |
| 30170               | 21965 |     | 21966 |      |   |
| 32.9980364949874    | 75    | 150 | 0     | Open | ; |
| 30171               | 18670 |     | 20147 |      |   |
| 32.9980541019916    | 160   | 150 | 0     | Open | ; |
| 30172               | 19714 |     | 19715 |      |   |
| 32.998067835558 75  |       | 150 | 0     | Open | ; |
| 30173               | 22715 |     | 20287 |      |   |
| 32.9980741823995    | 110   | 150 | 0     | Open | ; |
| 30174               | 22417 |     | 22437 |      |   |
| 32.9980781261407    | 125   | 150 | 0     | Open | ; |
| 30175               | 19656 |     | 19658 |      |   |
| 32.9980820530057    | 140   | 150 | 0     | Open | ; |
| 30176               | 20767 |     | 20678 |      |   |

|                  |       |     |       |      |   |
|------------------|-------|-----|-------|------|---|
| 32.9980820534274 | 110   | 150 | 0     | Open | ; |
| 30177            | 19585 |     | 19587 |      |   |
| 32.9980820540111 | 110   | 150 | 0     | Open | ; |
| 30178            | 20319 |     | 20320 |      |   |
| 32.9980820541231 | 140   | 150 | 0     | Open | ; |
| 30179            | 22339 |     | 20811 |      |   |
| 32.9980820530057 | 110   | 150 | 0     | Open | ; |
| 30180            | 18567 |     | 18568 |      |   |
| 32.9980820532166 | 110   | 150 | 0     | Open | ; |
| 30181            | 22219 |     | 22221 |      |   |
| 32.9980820532166 | 110   | 150 | 0     | Open | ; |
| 30182            | 22223 |     | 22226 |      |   |
| 32.9981006237221 | 250   | 150 | 0     | Open | ; |
| 30183            | 19597 |     | 19595 |      |   |
| 32.9981006251288 | 160   | 150 | 0     | Open | ; |
| 30184            | 22641 |     | 19593 |      |   |
| 32.9981006246635 | 160   | 150 | 0     | Open | ; |
| 30185            | 18894 |     | 22215 |      |   |
| 32.998100623757  | 250   | 150 | 0     | Open | ; |
| 30186            | 22087 |     | 22735 |      |   |
| 32.9981006251814 | 160   | 150 | 0     | Open | ; |
| 30187            | 20813 |     | 22339 |      |   |
| 32.9981006248744 | 110   | 150 | 0     | Open | ; |
| 30188            | 19373 |     | 24968 |      |   |
| 32.9981463762026 | 100   | 140 | 0     | Open | ; |
| 30189            | 22437 |     | 19581 |      |   |
| 32.998125674363  | 125   | 150 | 0     | Open | ; |
| 30190            | 19189 |     | 19190 |      |   |
| 32.9981377554167 | 200   | 150 | 0     | Open | ; |
| 30191            | 21460 |     | 21461 |      |   |
| 32.9981419076101 | 75    | 150 | 0     | Open | ; |
| 30192            | 23486 |     | 23487 |      |   |
| 32.9981502565275 | 75    | 140 | 0     | Open | ; |
| 30193            | 20998 |     | 20999 |      |   |
| 32.9981532292156 | 75    | 150 | 0     | Open | ; |
| 30194            | 19591 |     | 19618 |      |   |
| 32.9981803130412 | 110   | 150 | 0     | Open | ; |
| 30195            | 19593 |     | 19595 |      |   |
| 32.9981803136064 | 160   | 150 | 0     | Open | ; |
| 30196            | 23632 |     | 21341 |      |   |
| 32.9981877327884 | 110   | 150 | 0     | Open | ; |
| 30197            | 19601 |     | 18892 |      |   |
| 32.9981988840915 | 140   | 150 | 0     | Open | ; |
| 30198            | 19658 |     | 20319 |      |   |
| 32.9981988849981 | 140   | 150 | 0     | Open | ; |
| 30199            | 20811 |     | 18560 |      |   |
| 32.9981988849981 | 110   | 150 | 0     | Open | ; |
| 30200            | 22570 |     | 22571 |      |   |
| 32.9986042458423 | 75    | 150 | 0     | Open | ; |
| 30201            | 20107 |     | 20108 |      |   |

|                     |       |     |       |      |   |
|---------------------|-------|-----|-------|------|---|
| 32.9988151758428    | 125   | 150 | 0     | Open | ; |
| 30202               | 23310 |     | 20108 |      |   |
| 32.9991122099962    | 125   | 150 | 0     | Open | ; |
| 30203               | 22024 |     | 23638 |      |   |
| 32.9991284747427    | 125   | 150 | 0     | Open | ; |
| 30204               | 21158 |     | 21807 |      |   |
| 32.9993725080505    | 160   | 150 | 0     | Open | ; |
| 30205               | 19301 |     | 19302 |      |   |
| 32.999646798309 110 |       | 150 | 0     | Open | ; |
| 30206               | 24506 |     | 24772 |      |   |
| 32.9999349850444    | 75    | 150 | 0     | Open | ; |
| 30207               | 23732 |     | 23730 |      |   |
| 33.0206104936886    | 110   | 150 | 0     | Open | ; |
| 30208               | 19954 |     | 18876 |      |   |
| 33.0200086807558    | 100   | 140 | 0     | Open | ; |
| 30209               | 24778 |     | 24779 |      |   |
| 33.0200736286153    | 110   | 150 | 0     | Open | ; |
| 30210               | 24167 |     | 22041 |      |   |
| 33.0222104227129    | 125   | 140 | 0     | Open | ; |
| 30211               | 18572 |     | 20774 |      |   |
| 33.0479478154896    | 110   | 150 | 0     | Open | ; |
| 30212               | 20934 |     | 24043 |      |   |
| 33.0513737664385    | 125   | 150 | 0     | Open | ; |
| 30213               | 23913 |     | 20396 |      |   |
| 34.9980878746104    | 140   | 150 | 0     | Open | ; |
| 30214               | 22228 |     | 20680 |      |   |
| 34.9981675653713    | 110   | 150 | 0     | Open | ; |
| 30215               | 20286 |     | 19611 |      |   |
| 33.0655593952865    | 125   | 150 | 0     | Open | ; |
| 30216               | 18963 |     | 24960 |      |   |
| 33.0695514556432    | 200   | 140 | 0     | Open | ; |
| 30217               | 24774 |     | 24775 |      |   |
| 33.0752975644146    | 110   | 150 | 0     | Open | ; |
| 30218               | 20079 |     | 20080 |      |   |
| 33.080936962124 110 |       | 150 | 0     | Open | ; |
| 30219               | 20294 |     | 20295 |      |   |
| 33.0817937021507    | 110   | 150 | 0     | Open | ; |
| 30220               | 22555 |     | 20298 |      |   |
| 33.0827773853912    | 110   | 150 | 0     | Open | ; |
| 30221               | 20080 |     | 22683 |      |   |
| 33.0827773854265    | 110   | 150 | 0     | Open | ; |
| 30222               | 20630 |     | 20628 |      |   |
| 33.0828767224375    | 110   | 150 | 0     | Open | ; |
| 30223               | 20629 |     | 19684 |      |   |
| 33.0828767234845    | 110   | 150 | 0     | Open | ; |
| 30224               | 20298 |     | 20299 |      |   |
| 33.0828767226033    | 110   | 150 | 0     | Open | ; |
| 30225               | 20299 |     | 22559 |      |   |
| 33.082876723354 110 |       | 150 | 0     | Open | ; |
| 30226               | 20683 |     | 20679 |      |   |

|                  |       |     |       |      |   |
|------------------|-------|-----|-------|------|---|
| 33.0828767226033 | 110   | 150 | 0     | Open | ; |
| 30227            | 20079 |     | 23115 |      |   |
| 33.0849549467617 | 110   | 150 | 0     | Open | ; |
| 30228            | 22310 |     | 22312 |      |   |
| 33.0864674822895 | 110   | 150 | 0     | Open | ; |
| 30229            | 23507 |     | 22583 |      |   |
| 33.0907461767806 | 75    | 140 | 0     | Open | ; |
| 30230            | 18678 |     | 19252 |      |   |
| 33.1045784538181 | 160   | 150 | 0     | Open | ; |
| 30231            | 18507 |     | 18505 |      |   |
| 33.1236369486469 | 110   | 150 | 0     | Open | ; |
| 30232            | 23730 |     | 23731 |      |   |
| 33.1325542436013 | 110   | 150 | 0     | Open | ; |
| 30233            | 24784 |     | 24789 |      |   |
| 33.1360983220422 | 160   | 150 | 0     | Open | ; |
| 30234            | 20287 |     | 20748 |      |   |
| 33.1633375828112 | 110   | 150 | 0     | Open | ; |
| 30235            | 22074 |     | 20295 |      |   |
| 33.1794792549936 | 110   | 150 | 0     | Open | ; |
| 30236            | 19393 |     | 21075 |      |   |
| 33.2042698047131 | 110   | 150 | 0     | Open | ; |
| 30237            | 20963 |     | 20968 |      |   |
| 33.2252882298454 | 110   | 150 | 0     | Open | ; |
| 30238            | 20288 |     | 22714 |      |   |
| 33.2335079928353 | 110   | 150 | 0     | Open | ; |
| 30239            | 21992 |     | 21993 |      |   |
| 33.2488441794926 | 125   | 150 | 0     | Open | ; |
| 30240            | 22618 |     | 22715 |      |   |
| 33.2630536095727 | 110   | 150 | 0     | Open | ; |
| 30241            | 20753 |     | 20754 |      |   |
| 33.2829897433849 | 160   | 150 | 0     | Open | ; |
| 30242            | 24409 |     | 24411 |      |   |
| 33.2847297780947 | 160   | 150 | 0     | Open | ; |
| 30243            | 22284 |     | 21067 |      |   |
| 35.2597782913053 | 100   | 140 | 0     | Open | ; |
| 30244            | 21440 |     | 19707 |      |   |
| 33.4113946743533 | 110   | 150 | 0     | Open | ; |
| 30245            | 18955 |     | 20615 |      |   |
| 33.4309546256074 | 110   | 150 | 0     | Open | ; |
| 30246            | 21600 |     | 18926 |      |   |
| 33.4387163874016 | 110   | 150 | 0     | Open | ; |
| 30247            | 24334 |     | 22305 |      |   |
| 39.0054788449733 | 140   | 150 | 0     | Open | ; |
| 30248            | 18956 |     | 20288 |      |   |
| 33.4834853719298 | 110   | 150 | 0     | Open | ; |
| 30249            | 21331 |     | 21362 |      |   |
| 33.499272733618  | 75    | 140 | 0     | Open | ; |
| 30250            | 18493 |     | 19510 |      |   |
| 33.5072510706168 | 125   | 150 | 0     | Open | ; |
| 30251            | 24481 |     | 24485 |      |   |

|                  |       |     |       |      |   |
|------------------|-------|-----|-------|------|---|
| 33.5439130081951 | 110   | 150 | 0     | Open | ; |
| 30252            | 23621 |     | 22967 |      |   |
| 33.5510252371221 | 110   | 150 | 0     | Open | ; |
| 30253            | 18594 |     | 18595 |      |   |
| 33.6388200818983 | 75    | 150 | 0     | Open | ; |
| 30254            | 24444 |     | 24711 |      |   |
| 33.6410313242724 | 110   | 150 | 0     | Open | ; |
| 30255            | 19697 |     | 19441 |      |   |
| 33.6432690786014 | 140   | 150 | 0     | Open | ; |
| 30256            | 19058 |     | 19254 |      |   |
| 33.6445030988414 | 160   | 150 | 0     | Open | ; |
| 30257            | 24015 |     | 24016 |      |   |
| 33.655592493183  | 110   | 150 | 0     | Open | ; |
| 30258            | 23575 |     | 22552 |      |   |
| 33.6768832223864 | 125   | 140 | 0     | Open | ; |
| 30259            | 22480 |     | 19993 |      |   |
| 33.6863774821014 | 75    | 150 | 0     | Open | ; |
| 30260            | 21543 |     | 20330 |      |   |
| 33.6989524142966 | 110   | 150 | 0     | Open | ; |
| 30261            | 19877 |     | 24539 |      |   |
| 33.7191707403965 | 160   | 150 | 0     | Open | ; |
| 30262            | 22777 |     | 20463 |      |   |
| 33.7279910541832 | 110   | 150 | 0     | Open | ; |
| 30263            | 23966 |     | 21034 |      |   |
| 33.7701176562959 | 200   | 150 | 0     | Open | ; |
| 30264            | 24219 |     | 19843 |      |   |
| 33.7736555660534 | 125   | 140 | 0     | Open | ; |
| 30265            | 22302 |     | 20045 |      |   |
| 33.7865113535725 | 160   | 150 | 0     | Open | ; |
| 30266            | 19162 |     | 19163 |      |   |
| 33.8015918221332 | 110   | 150 | 0     | Open | ; |
| 30267            | 24761 |     | 24760 |      |   |
| 33.8234288737686 | 160   | 150 | 0     | Open | ; |
| 30268            | 24491 |     | 24496 |      |   |
| 33.85502828485   | 110   | 150 | 0     | Open | ; |
| 30269            | 19480 |     | 23893 |      |   |
| 33.8899915015077 | 110   | 150 | 0     | Open | ; |
| 30270            | 18583 |     | 18584 |      |   |
| 33.8966212726307 | 160   | 150 | 0     | Open | ; |
| 30271            | 22714 |     | 22716 |      |   |
| 33.9065635538914 | 110   | 150 | 0     | Open | ; |
| 30272            | 22166 |     | 22541 |      |   |
| 36.1187208671514 | 125   | 150 | 0     | Open | ; |
| 30273            | 20707 |     | 22783 |      |   |
| 33.92802262269   | 200   | 150 | 0     | Open | ; |
| 30274            | 21274 |     | 21276 |      |   |
| 33.9818785627852 | 75    | 140 | 0     | Open | ; |
| 30275            | 21822 |     | 20066 |      |   |
| 33.9897574221981 | 75    | 140 | 0     | Open | ; |
| 30276            | 20363 |     | 20860 |      |   |

|                  |       |     |       |      |   |
|------------------|-------|-----|-------|------|---|
| 33.9981816019837 | 100   | 140 | 0     | Open | ; |
| 30277            | 21310 |     | 21091 |      |   |
| 33.9971829670964 | 160   | 150 | 0     | Open | ; |
| 30278            | 23497 |     | 24277 |      |   |
| 33.9972030646165 | 125   | 150 | 0     | Open | ; |
| 30279            | 24216 |     | 24215 |      |   |
| 33.9979276071048 | 110   | 150 | 0     | Open | ; |
| 30280            | 20777 |     | 20778 |      |   |
| 33.9978474856304 | 75    | 150 | 0     | Open | ; |
| 30281            | 23947 |     | 23948 |      |   |
| 33.9979270968004 | 75    | 150 | 0     | Open | ; |
| 30282            | 20465 |     | 20776 |      |   |
| 33.9979470079755 | 75    | 150 | 0     | Open | ; |
| 30283            | 18506 |     | 21434 |      |   |
| 33.9979609135879 | 75    | 150 | 0     | Open | ; |
| 30284            | 23217 |     | 23218 |      |   |
| 33.9979927009733 | 75    | 150 | 0     | Open | ; |
| 30285            | 19874 |     | 23977 |      |   |
| 33.9980271563629 | 110   | 150 | 0     | Open | ; |
| 30286            | 23477 |     | 23478 |      |   |
| 33.9980528070443 | 160   | 150 | 0     | Open | ; |
| 30287            | 19249 |     | 19217 |      |   |
| 33.9980529217551 | 110   | 150 | 0     | Open | ; |
| 30288            | 19297 |     | 20735 |      |   |
| 33.9980742347238 | 140   | 150 | 0     | Open | ; |
| 30289            | 18560 |     | 18561 |      |   |
| 33.9980756788541 | 110   | 150 | 0     | Open | ; |
| 30290            | 22215 |     | 22217 |      |   |
| 33.9980756786432 | 250   | 150 | 0     | Open | ; |
| 30291            | 21797 |     | 18495 |      |   |
| 33.9981127820234 | 160   | 150 | 0     | Open | ; |
| 30292            | 19329 |     | 19330 |      |   |
| 33.9981429004511 | 110   | 150 | 0     | Open | ; |
| 30293            | 19464 |     | 19465 |      |   |
| 33.9982423130405 | 75    | 140 | 0     | Open | ; |
| 30294            | 20735 |     | 20429 |      |   |
| 33.9983068225901 | 140   | 150 | 0     | Open | ; |
| 30295            | 19211 |     | 19219 |      |   |
| 33.9983890947781 | 110   | 150 | 0     | Open | ; |
| 30296            | 23090 |     | 21131 |      |   |
| 33.9984940539162 | 100   | 140 | 0     | Open | ; |
| 30297            | 23870 |     | 23871 |      |   |
| 33.9985792917769 | 75    | 150 | 0     | Open | ; |
| 30298            | 19219 |     | 21182 |      |   |
| 33.9991136668123 | 110   | 150 | 0     | Open | ; |
| 30299            | 18927 |     | 18928 |      |   |
| 34.0074102662088 | 140   | 150 | 0     | Open | ; |
| 30300            | 19673 |     | 19670 |      |   |
| 34.0286133336271 | 200   | 150 | 0     | Open | ; |
| 30301            | 23655 |     | 23656 |      |   |



|                     |       |     |       |      |   |
|---------------------|-------|-----|-------|------|---|
| 34.0360366389641    | 200   | 150 | 0     | Open | ; |
| 30302               | 23914 |     | 19656 |      |   |
| 35.998081500449 140 |       | 150 | 0     | Open | ; |
| 30303               | 21756 |     | 21757 |      |   |
| 34.0659552089568    | 75    | 140 | 0     | Open | ; |
| 30304               | 19354 |     | 21497 |      |   |
| 34.068932774046 110 |       | 150 | 0     | Open | ; |
| 30305               | 22261 |     | 22555 |      |   |
| 34.0854174197642    | 110   | 150 | 0     | Open | ; |
| 30306               | 20979 |     | 24984 |      |   |
| 34.1285591151411    | 75    | 140 | 0     | Open | ; |
| 30307               | 21138 |     | 23380 |      |   |
| 34.1074323855175    | 75    | 150 | 0     | Open | ; |
| 30308               | 18889 |     | 19517 |      |   |
| 34.1085612771203    | 110   | 150 | 0     | Open | ; |
| 30309               | 20325 |     | 20328 |      |   |
| 34.1116663804566    | 125   | 150 | 0     | Open | ; |
| 30310               | 23737 |     | 20318 |      |   |
| 34.1347750809725    | 110   | 150 | 0     | Open | ; |
| 30311               | 18561 |     | 21888 |      |   |
| 34.1348733412282    | 110   | 150 | 0     | Open | ; |
| 30312               | 24441 |     | 24442 |      |   |
| 34.1378787046566    | 75    | 150 | 0     | Open | ; |
| 30313               | 23759 |     | 19964 |      |   |
| 35.998041310759 125 |       | 150 | 0     | Open | ; |
| 30314               | 21413 |     | 20191 |      |   |
| 34.1630365830835    | 150   | 140 | 0     | Open | ; |
| 30315               | 22974 |     | 21134 |      |   |
| 34.1639478203319    | 100   | 140 | 0     | Open | ; |
| 30316               | 24112 |     | 24101 |      |   |
| 145.257941349563    | 75    | 150 | 0     | Open | ; |
| 30317               | 21792 |     | 23312 |      |   |
| 34.199669271552 110 |       | 150 | 0     | Open | ; |
| 30318               | 23720 |     | 22144 |      |   |
| 34.2008478381324    | 110   | 150 | 0     | Open | ; |
| 30319               | 23406 |     | 23407 |      |   |
| 34.2035523998075    | 160   | 150 | 0     | Open | ; |
| 30320               | 19029 |     | 22376 |      |   |
| 34.2806268037082    | 200   | 150 | 0     | Open | ; |
| 30321               | 23445 |     | 23444 |      |   |
| 34.2972827217941    | 100   | 140 | 0     | Open | ; |
| 30322               | 20737 |     | 20736 |      |   |
| 34.3205082131816    | 100   | 100 | 0     | Open | ; |
| 30324               | 24100 |     | 24099 |      |   |
| 144.216057897994    | 75    | 150 | 0     | Open | ; |
| 30325               | 23759 |     | 23282 |      |   |
| 34.3588759568033    | 125   | 150 | 0     | Open | ; |
| 30326               | 19490 |     | 19491 |      |   |
| 34.3660256194359    | 75    | 150 | 0     | Open | ; |
| 30327               | 24798 |     | 24799 |      |   |

|                     |       |     |       |      |   |
|---------------------|-------|-----|-------|------|---|
| 34.3699539949529    | 110   | 150 | 0     | Open | ; |
| 30328               | 24793 |     | 24794 |      |   |
| 34.3700405375725    | 110   | 150 | 0     | Open | ; |
| 30329               | 24802 |     | 24803 |      |   |
| 34.3700405380525    | 110   | 150 | 0     | Open | ; |
| 30330               | 24796 |     | 24797 |      |   |
| 34.3700405375903    | 110   | 150 | 0     | Open | ; |
| 30331               | 19050 |     | 23437 |      |   |
| 34.3980374101777    | 125   | 140 | 0     | Open | ; |
| 30332               | 24800 |     | 24812 |      |   |
| 34.404304907536 110 |       | 150 | 0     | Open | ; |
| 30333               | 24498 |     | 24499 |      |   |
| 34.5184191560299    | 350   | 140 | 0     | Open | ; |
| 30334               | 19504 |     | 19505 |      |   |
| 34.5024775743845    | 100   | 140 | 0     | Open | ; |
| 30335               | 20869 |     | 18945 |      |   |
| 34.5189626185796    | 100   | 140 | 0     | Open | ; |
| 30336               | 18637 |     | 18638 |      |   |
| 34.5507255571169    | 100   | 140 | 0     | Open | ; |
| 30337               | 22707 |     | 22708 |      |   |
| 34.5770147476943    | 110   | 150 | 0     | Open | ; |
| 30338               | 21589 |     | 21590 |      |   |
| 34.5964511797206    | 75    | 140 | 0     | Open | ; |
| 30339               | 18491 |     | 21797 |      |   |
| 34.5980455305819    | 160   | 150 | 0     | Open | ; |
| 30340               | 22817 |     | 23116 |      |   |
| 34.6300739796573    | 75    | 150 | 0     | Open | ; |
| 30341               | 19031 |     | 18562 |      |   |
| 34.6428400827818    | 200   | 150 | 0     | Open | ; |
| 30342               | 23563 |     | 23224 |      |   |
| 34.6994072781155    | 100   | 140 | 0     | Open | ; |
| 30343               | 20984 |     | 20985 |      |   |
| 34.7437719138043    | 350   | 140 | 0     | Open | ; |
| 30344               | 21881 |     | 20157 |      |   |
| 34.7161384560333    | 110   | 150 | 0     | Open | ; |
| 30345               | 19946 |     | 22318 |      |   |
| 34.7282818978093    | 140   | 150 | 0     | Open | ; |
| 30346               | 22953 |     | 23488 |      |   |
| 34.7308957776054    | 125   | 140 | 0     | Open | ; |
| 30347               | 20622 |     | 20623 |      |   |
| 34.7387101131345    | 110   | 150 | 0     | Open | ; |
| 30348               | 24594 |     | 25685 |      |   |
| 36.581599528748 100 |       | 140 | 0     | Open | ; |
| 30349               | 25061 |     | 25143 |      |   |
| 36.498893740816 160 |       | 150 | 0     | Open | ; |
| 30350               | 24677 |     | 24675 |      |   |
| 34.8085945676889    | 110   | 150 | 0     | Open | ; |
| 30351               | 22845 |     | 21593 |      |   |
| 34.9073375651607    | 250   | 150 | 0     | Open | ; |
| 30352               | 22458 |     | 24021 |      |   |

|                  |       |     |       |      |   |
|------------------|-------|-----|-------|------|---|
| 34.8594062843926 | 75    | 140 | 0     | Open | ; |
| 30353            | 20406 |     | 23253 |      |   |
| 34.8659557400875 | 110   | 150 | 0     | Open | ; |
| 30354            | 22640 |     | 20960 |      |   |
| 42.0792932276027 | 110   | 150 | 0     | Open | ; |
| 30356            | 21619 |     | 22397 |      |   |
| 34.9140090882612 | 110   | 150 | 0     | Open | ; |
| 30357            | 18606 |     | 18607 |      |   |
| 34.9333800413797 | 160   | 150 | 0     | Open | ; |
| 30358            | 22764 |     | 22765 |      |   |
| 34.9405197837385 | 200   | 150 | 0     | Open | ; |
| 30359            | 24742 |     | 24745 |      |   |
| 34.9460959981258 | 110   | 150 | 0     | Open | ; |
| 30360            | 23572 |     | 23574 |      |   |
| 34.9955194140354 | 100   | 140 | 0     | Open | ; |
| 30361            | 19378 |     | 21498 |      |   |
| 34.9956015170097 | 110   | 150 | 0     | Open | ; |
| 30362            | 18707 |     | 18820 |      |   |
| 34.9972058196862 | 75    | 150 | 0     | Open | ; |
| 30363            | 23250 |     | 22513 |      |   |
| 34.9979586933567 | 160   | 150 | 0     | Open | ; |
| 30364            | 22894 |     | 22895 |      |   |
| 34.9979833460972 | 75    | 140 | 0     | Open | ; |
| 30365            | 19217 |     | 23035 |      |   |
| 34.997985113129  | 110   | 150 | 0     | Open | ; |
| 30366            | 23446 |     | 20494 |      |   |
| 34.9979955618708 | 110   | 150 | 0     | Open | ; |
| 30367            | 21172 |     | 18493 |      |   |
| 34.9979964416413 | 125   | 150 | 0     | Open | ; |
| 30368            | 18821 |     | 18706 |      |   |
| 34.9980048234535 | 75    | 150 | 0     | Open | ; |
| 30369            | 18946 |     | 21735 |      |   |
| 34.998022187596  | 100   | 140 | 0     | Open | ; |
| 30370            | 18608 |     | 18609 |      |   |
| 34.9980441837791 | 160   | 150 | 0     | Open | ; |
| 30371            | 20015 |     | 23538 |      |   |
| 34.9980467348603 | 75    | 140 | 0     | Open | ; |
| 30372            | 23314 |     | 18838 |      |   |
| 34.9981073649022 | 125   | 150 | 0     | Open | ; |
| 30373            | 18508 |     | 21269 |      |   |
| 34.9982123462135 | 75    | 150 | 0     | Open | ; |
| 30374            | 20978 |     | 18707 |      |   |
| 34.9989804340721 | 75    | 150 | 0     | Open | ; |
| 30375            | 23580 |     | 23150 |      |   |
| 34.999644464263  | 160   | 150 | 0     | Open | ; |
| 30376            | 24514 |     | 24769 |      |   |
| 34.9999407164485 | 110   | 150 | 0     | Open | ; |
| 30377            | 23529 |     | 23530 |      |   |
| 35.0010714817294 | 75    | 140 | 0     | Open | ; |
| 30378            | 20879 |     | 23780 |      |   |

|                     |       |     |       |      |   |
|---------------------|-------|-----|-------|------|---|
| 35.0025973930614    | 75    | 140 | 0     | Open | ; |
| 30379               | 22206 |     | 19583 |      |   |
| 35.0097778186814    | 200   | 150 | 0     | Open | ; |
| 30380               | 19144 |     | 19145 |      |   |
| 35.0097963893125    | 110   | 150 | 0     | Open | ; |
| 30381               | 22478 |     | 21081 |      |   |
| 35.0686654887988    | 125   | 150 | 0     | Open | ; |
| 30382               | 18911 |     | 18912 |      |   |
| 35.0808376008754    | 75    | 150 | 0     | Open | ; |
| 30383               | 19583 |     | 22703 |      |   |
| 35.0834626176782    | 200   | 150 | 0     | Open | ; |
| 30384               | 20657 |     | 20656 |      |   |
| 145.839324166791    | 110   | 150 | 0     | Open | ; |
| 30385               | 20656 |     | 20657 |      |   |
| 35.1135113779269    | 110   | 150 | 0     | Open | ; |
| 30386               | 22090 |     | 19634 |      |   |
| 35.134768704896 200 |       | 150 | 0     | Open | ; |
| 30387               | 24582 |     | 24559 |      |   |
| 35.1349685157725    | 140   | 150 | 0     | Open | ; |
| 30388               | 20492 |     | 24030 |      |   |
| 35.1469349666513    | 160   | 150 | 0     | Open | ; |
| 30389               | 21633 |     | 19236 |      |   |
| 35.1642859788319    | 110   | 150 | 0     | Open | ; |
| 30390               | 21679 |     | 21680 |      |   |
| 35.1747014864216    | 140   | 150 | 0     | Open | ; |
| 30391               | 24674 |     | 24676 |      |   |
| 35.1763545245758    | 110   | 150 | 0     | Open | ; |
| 30392               | 19356 |     | 21981 |      |   |
| 35.1804795312197    | 110   | 150 | 0     | Open | ; |
| 30393               | 23378 |     | 20891 |      |   |
| 35.1990363263727    | 110   | 150 | 0     | Open | ; |
| 30394               | 24924 |     | 24925 |      |   |
| 35.198490890504 110 |       | 150 | 0     | Open | ; |
| 30395               | 22945 |     | 21687 |      |   |
| 70.1084785190555    | 100   | 140 | 0     | Open | ; |
| 30396               | 20312 |     | 22690 |      |   |
| 35.2537428657176    | 110   | 150 | 0     | Open | ; |
| 30397               | 18705 |     | 21481 |      |   |
| 35.3176839782996    | 110   | 150 | 0     | Open | ; |
| 30398               | 22011 |     | 21013 |      |   |
| 35.2928963884452    | 125   | 150 | 0     | Open | ; |
| 30399               | 22284 |     | 21822 |      |   |
| 35.306467511347 75  |       | 140 | 0     | Open | ; |
| 30400               | 24411 |     | 24405 |      |   |
| 35.3230401708675    | 160   | 150 | 0     | Open | ; |
| 30401               | 21740 |     | 19940 |      |   |
| 35.342819624968 160 |       | 150 | 0     | Open | ; |
| 30402               | 21911 |     | 24558 |      |   |
| 35.3465876865964    | 110   | 150 | 0     | Open | ; |
| 30403               | 22285 |     | 20066 |      |   |

|                     |       |     |       |      |   |
|---------------------|-------|-----|-------|------|---|
| 35.3867247559668    | 75    | 140 | 0     | Open | ; |
| 30404               | 24088 |     | 23991 |      |   |
| 43.9490971226102    | 160   | 150 | 0     | Open | ; |
| 30405               | 20634 |     | 20035 |      |   |
| 35.3978337340296    | 100   | 140 | 0     | Open | ; |
| 30406               | 18883 |     | 19421 |      |   |
| 35.4070073287739    | 140   | 150 | 0     | Open | ; |
| 30407               | 24469 |     | 24471 |      |   |
| 35.4110174409135    | 140   | 150 | 0     | Open | ; |
| 30408               | 21657 |     | 21755 |      |   |
| 35.4238703435322    | 75    | 140 | 0     | Open | ; |
| 30409               | 19841 |     | 23278 |      |   |
| 35.4335163165937    | 110   | 150 | 0     | Open | ; |
| 30410               | 19311 |     | 19314 |      |   |
| 35.4557300178646    | 200   | 140 | 0     | Open | ; |
| 30411               | 19014 |     | 19016 |      |   |
| 35.8945742169606    | 125   | 150 | 0     | Open | ; |
| 30412               | 21365 |     | 21366 |      |   |
| 35.4733096650905    | 110   | 150 | 0     | Open | ; |
| 30413               | 18728 |     | 23494 |      |   |
| 35.4804230942788    | 125   | 150 | 0     | Open | ; |
| 30414               | 23848 |     | 21112 |      |   |
| 35.4929113723147    | 110   | 150 | 0     | Open | ; |
| 30415               | 19087 |     | 19088 |      |   |
| 35.4964535696247    | 125   | 150 | 0     | Open | ; |
| 30416               | 21437 |     | 21438 |      |   |
| 35.4964897392389    | 100   | 140 | 0     | Open | ; |
| 30417               | 23203 |     | 20524 |      |   |
| 35.5167600809259    | 110   | 150 | 0     | Open | ; |
| 30418               | 23332 |     | 23335 |      |   |
| 35.5263290569795    | 160   | 150 | 0     | Open | ; |
| 30419               | 19269 |     | 19270 |      |   |
| 35.5492431261502    | 110   | 150 | 0     | Open | ; |
| 30420               | 19702 |     | 19703 |      |   |
| 35.5824711289715    | 160   | 150 | 0     | Open | ; |
| 30421               | 23851 |     | 23852 |      |   |
| 35.6187759266486    | 110   | 150 | 0     | Open | ; |
| 30422               | 19848 |     | 23395 |      |   |
| 35.6190952128312    | 110   | 150 | 0     | Open | ; |
| 30423               | 22608 |     | 21633 |      |   |
| 35.658419041298 110 |       | 150 | 0     | Open | ; |
| 30424               | 24579 |     | 24623 |      |   |
| 35.7009404001359    | 110   | 150 | 0     | Open | ; |
| 30425               | 21085 |     | 23770 |      |   |
| 35.7063011094293    | 110   | 150 | 0     | Open | ; |
| 30426               | 21243 |     | 21244 |      |   |
| 35.7135312162179    | 160   | 150 | 0     | Open | ; |
| 30427               | 24610 |     | 24624 |      |   |
| 35.7160647561273    | 110   | 150 | 0     | Open | ; |
| 30428               | 21099 |     | 19239 |      |   |

|                     |       |     |       |      |   |
|---------------------|-------|-----|-------|------|---|
| 40.5990037964641    | 110   | 150 | 0     | Open | ; |
| 30429               | 22911 |     | 22912 |      |   |
| 35.7597740395332    | 100   | 140 | 0     | Open | ; |
| 30430               | 21327 |     | 21328 |      |   |
| 35.7719607151323    | 125   | 140 | 0     | Open | ; |
| 30431               | 23109 |     | 22836 |      |   |
| 35.7772077482381    | 100   | 140 | 0     | Open | ; |
| 30432               | 24779 |     | 24763 |      |   |
| 35.7777067512878    | 160   | 150 | 0     | Open | ; |
| 30433               | 19289 |     | 21254 |      |   |
| 35.7948552256313    | 110   | 150 | 0     | Open | ; |
| 30434               | 19054 |     | 19060 |      |   |
| 35.818406834016 140 |       | 150 | 0     | Open | ; |
| 30435               | 18955 |     | 18953 |      |   |
| 35.831071021721 110 |       | 150 | 0     | Open | ; |
| 30436               | 19852 |     | 19853 |      |   |
| 35.8494888396583    | 100   | 140 | 0     | Open | ; |
| 30437               | 21442 |     | 19696 |      |   |
| 35.8564939743295    | 75    | 140 | 0     | Open | ; |
| 30438               | 19399 |     | 19400 |      |   |
| 35.8740722811091    | 110   | 150 | 0     | Open | ; |
| 30439               | 20633 |     | 22689 |      |   |
| 35.8973875103763    | 125   | 150 | 0     | Open | ; |
| 30440               | 25679 |     | 24594 |      |   |
| 39.4166274872475    | 110   | 150 | 0     | Open | ; |
| 30441               | 24743 |     | 24744 |      |   |
| 35.9227410758093    | 90    | 150 | 0     | Open | ; |
| 30442               | 18719 |     | 18667 |      |   |
| 40.482525451042 100 |       | 140 | 0     | Open | ; |
| 30443               | 24846 |     | 24842 |      |   |
| 35.93509692961 110  |       | 150 | 0     | Open | ; |
| 30444               | 19436 |     | 19946 |      |   |
| 35.9950408535232    | 140   | 150 | 0     | Open | ; |
| 30445               | 19896 |     | 21379 |      |   |
| 35.9959970284286    | 140   | 150 | 0     | Open | ; |
| 30446               | 20743 |     | 20744 |      |   |
| 35.9977994271085    | 75    | 150 | 0     | Open | ; |
| 30447               | 18471 |     | 18472 |      |   |
| 35.9966465548757    | 75    | 140 | 0     | Open | ; |
| 30448               | 19197 |     | 19198 |      |   |
| 35.997591495624 110 |       | 150 | 0     | Open | ; |
| 30449               | 19113 |     | 19114 |      |   |
| 35.9977879363491    | 75    | 140 | 0     | Open | ; |
| 30450               | 23077 |     | 24366 |      |   |
| 35.9977967901543    | 100   | 140 | 0     | Open | ; |
| 30451               | 18692 |     | 18693 |      |   |
| 35.9980443130244    | 125   | 150 | 0     | Open | ; |
| 30452               | 20179 |     | 20180 |      |   |
| 35.9978799002015    | 160   | 150 | 0     | Open | ; |
| 30453               | 21345 |     | 21346 |      |   |

|                     |       |     |       |      |   |
|---------------------|-------|-----|-------|------|---|
| 35.9978859520039    | 125   | 150 | 0     | Open | ; |
| 30454               | 21807 |     | 21809 |      |   |
| 35.9978903788079    | 160   | 150 | 0     | Open | ; |
| 30455               | 23867 |     | 21737 |      |   |
| 35.9978941959461    | 110   | 150 | 0     | Open | ; |
| 30456               | 20052 |     | 22054 |      |   |
| 35.9978949364423    | 140   | 150 | 0     | Open | ; |
| 30457               | 20408 |     | 20409 |      |   |
| 35.9978958063095    | 140   | 150 | 0     | Open | ; |
| 30458               | 21114 |     | 21115 |      |   |
| 35.9979013923547    | 110   | 150 | 0     | Open | ; |
| 30459               | 21344 |     | 21343 |      |   |
| 35.9979045184859    | 125   | 150 | 0     | Open | ; |
| 30460               | 21004 |     | 23516 |      |   |
| 35.997909594517 75  |       | 150 | 0     | Open | ; |
| 30461               | 20128 |     | 22823 |      |   |
| 35.9979103939247    | 160   | 150 | 0     | Open | ; |
| 30463               | 20588 |     | 23769 |      |   |
| 35.997931922173 75  |       | 150 | 0     | Open | ; |
| 30464               | 22029 |     | 22030 |      |   |
| 35.9979389187739    | 125   | 150 | 0     | Open | ; |
| 30465               | 19435 |     | 19436 |      |   |
| 35.9979475132965    | 140   | 150 | 0     | Open | ; |
| 30466               | 18713 |     | 21913 |      |   |
| 35.9979635656026    | 110   | 150 | 0     | Open | ; |
| 30467               | 18521 |     | 23418 |      |   |
| 35.9979761738341    | 75    | 140 | 0     | Open | ; |
| 30468               | 19093 |     | 19868 |      |   |
| 35.9979836204651    | 75    | 150 | 0     | Open | ; |
| 30469               | 18690 |     | 18691 |      |   |
| 35.9979844382648    | 140   | 150 | 0     | Open | ; |
| 30470               | 21115 |     | 21227 |      |   |
| 35.997998425584 110 |       | 150 | 0     | Open | ; |
| 30471               | 20576 |     | 22812 |      |   |
| 35.998006108553 160 |       | 150 | 0     | Open | ; |
| 30472               | 23765 |     | 20076 |      |   |
| 35.998007917353 160 |       | 150 | 0     | Open | ; |
| 30473               | 23391 |     | 23392 |      |   |
| 35.9980115387641    | 75    | 140 | 0     | Open | ; |
| 30474               | 20127 |     | 20128 |      |   |
| 35.9980822153342    | 160   | 150 | 0     | Open | ; |
| 30475               | 23049 |     | 23050 |      |   |
| 35.9980915200381    | 75    | 150 | 0     | Open | ; |
| 30476               | 18733 |     | 19896 |      |   |
| 35.9981014238297    | 140   | 150 | 0     | Open | ; |
| 30477               | 22812 |     | 22814 |      |   |
| 35.9984310342434    | 160   | 150 | 0     | Open | ; |
| 30478               | 21620 |     | 20413 |      |   |
| 35.9997908747174    | 100   | 140 | 0     | Open | ; |
| 30479               | 23199 |     | 21938 |      |   |

|                     |       |     |       |      |   |
|---------------------|-------|-----|-------|------|---|
| 36.0004820646883    | 125   | 150 | 0     | Open | ; |
| 30480               | 22508 |     | 23537 |      |   |
| 36.0009587228418    | 110   | 150 | 0     | Open | ; |
| 30481               | 21547 |     | 21844 |      |   |
| 36.0051826436249    | 160   | 150 | 0     | Open | ; |
| 30482               | 18801 |     | 23313 |      |   |
| 36.0136219452727    | 140   | 150 | 0     | Open | ; |
| 30483               | 20072 |     | 20024 |      |   |
| 36.0302922363641    | 110   | 150 | 0     | Open | ; |
| 30484               | 22266 |     | 22107 |      |   |
| 36.0373430196577    | 110   | 150 | 0     | Open | ; |
| 30485               | 22689 |     | 22478 |      |   |
| 36.0515539368813    | 125   | 150 | 0     | Open | ; |
| 30486               | 22659 |     | 23628 |      |   |
| 36.0555241424011    | 75    | 140 | 0     | Open | ; |
| 30487               | 19785 |     | 22587 |      |   |
| 36.0772347478081    | 110   | 150 | 0     | Open | ; |
| 30488               | 21894 |     | 20843 |      |   |
| 49.813855522996 100 |       | 140 | 0     | Open | ; |
| 30490               | 19188 |     | 19499 |      |   |
| 36.1031105938048    | 200   | 150 | 0     | Open | ; |
| 30491               | 19389 |     | 19390 |      |   |
| 36.1163716823431    | 75    | 150 | 0     | Open | ; |
| 30492               | 21086 |     | 23822 |      |   |
| 36.1163716834779    | 75    | 150 | 0     | Open | ; |
| 30493               | 23148 |     | 19807 |      |   |
| 36.1373649929466    | 100   | 140 | 0     | Open | ; |
| 30494               | 24506 |     | 24507 |      |   |
| 36.1798164054605    | 110   | 150 | 0     | Open | ; |
| 30495               | 21922 |     | 21671 |      |   |
| 36.1818287243884    | 110   | 150 | 0     | Open | ; |
| 30496               | 19215 |     | 23250 |      |   |
| 36.1833364582955    | 160   | 150 | 0     | Open | ; |
| 30497               | 22605 |     | 22476 |      |   |
| 36.1870805371798    | 200   | 150 | 0     | Open | ; |
| 30498               | 20186 |     | 19162 |      |   |
| 36.194000093733 110 |       | 150 | 0     | Open | ; |
| 30499               | 23065 |     | 20626 |      |   |
| 36.1991213024309    | 200   | 150 | 0     | Open | ; |
| 30500               | 24016 |     | 21024 |      |   |
| 36.2733020189146    | 110   | 150 | 0     | Open | ; |
| 30501               | 21694 |     | 21695 |      |   |
| 36.2979458359772    | 140   | 150 | 0     | Open | ; |
| 30502               | 20107 |     | 25004 |      |   |
| 38.246839648677 125 |       | 150 | 0     | Open | ; |
| 30503               | 19428 |     | 19697 |      |   |
| 36.3505007904854    | 140   | 150 | 0     | Open | ; |
| 30504               | 18708 |     | 18709 |      |   |
| 36.3565644418256    | 75    | 150 | 0     | Open | ; |
| 30505               | 18808 |     | 18809 |      |   |



|                     |       |     |       |      |   |
|---------------------|-------|-----|-------|------|---|
| 36.3978086964623    | 125   | 150 | 0     | Open | ; |
| 30506               | 24026 |     | 19187 |      |   |
| 36.4085360484823    | 200   | 150 | 0     | Open | ; |
| 30507               | 19993 |     | 21972 |      |   |
| 36.4099929064211    | 75    | 150 | 0     | Open | ; |
| 30508               | 18804 |     | 19565 |      |   |
| 36.4146149767907    | 125   | 150 | 0     | Open | ; |
| 30509               | 21390 |     | 24015 |      |   |
| 36.4151691233076    | 110   | 150 | 0     | Open | ; |
| 30510               | 20708 |     | 22891 |      |   |
| 36.4168741028893    | 75    | 150 | 0     | Open | ; |
| 30511               | 18564 |     | 18565 |      |   |
| 36.4215357846512    | 75    | 150 | 0     | Open | ; |
| 30512               | 19938 |     | 18900 |      |   |
| 36.4390991466222    | 110   | 150 | 0     | Open | ; |
| 30513               | 21322 |     | 22589 |      |   |
| 36.447313323432 100 |       | 140 | 0     | Open | ; |
| 30514               | 24029 |     | 22814 |      |   |
| 36.4484955164487    | 160   | 150 | 0     | Open | ; |
| 30515               | 21278 |     | 23506 |      |   |
| 36.4511725254382    | 125   | 140 | 0     | Open | ; |
| 30516               | 22113 |     | 22114 |      |   |
| 36.4724588535841    | 125   | 150 | 0     | Open | ; |
| 30517               | 23267 |     | 19566 |      |   |
| 36.495661840185 125 |       | 150 | 0     | Open | ; |
| 30518               | 19563 |     | 23267 |      |   |
| 36.4957361342933    | 125   | 150 | 0     | Open | ; |
| 30519               | 22911 |     | 23102 |      |   |
| 36.5161896493838    | 100   | 140 | 0     | Open | ; |
| 30520               | 23462 |     | 24590 |      |   |
| 36.5277031691699    | 110   | 150 | 0     | Open | ; |
| 30521               | 20420 |     | 22405 |      |   |
| 36.5797432804323    | 110   | 150 | 0     | Open | ; |
| 30522               | 21141 |     | 21142 |      |   |
| 36.6128676094705    | 160   | 150 | 0     | Open | ; |
| 30523               | 19354 |     | 20023 |      |   |
| 36.6158304836048    | 110   | 150 | 0     | Open | ; |
| 30524               | 23880 |     | 22819 |      |   |
| 47.9703139010807    | 160   | 150 | 0     | Open | ; |
| 30525               | 20407 |     | 22266 |      |   |
| 36.6336116279872    | 110   | 150 | 0     | Open | ; |
| 30526               | 22354 |     | 20426 |      |   |
| 36.6662803034293    | 110   | 150 | 0     | Open | ; |
| 30527               | 20677 |     | 20766 |      |   |
| 36.6736404057931    | 125   | 150 | 0     | Open | ; |
| 30528               | 24694 |     | 24693 |      |   |
| 36.6889647798486    | 160   | 150 | 0     | Open | ; |
| 30529               | 22023 |     | 22024 |      |   |
| 36.6900645220553    | 125   | 150 | 0     | Open | ; |
| 30530               | 19506 |     | 19507 |      |   |

|                    |       |     |       |      |   |
|--------------------|-------|-----|-------|------|---|
| 36.6979141089291   | 100   | 140 | 0     | Open | ; |
| 30531              | 22345 |     | 22770 |      |   |
| 36.7347199615299   | 110   | 150 | 0     | Open | ; |
| 30532              | 23153 |     | 23154 |      |   |
| 36.7565340704747   | 110   | 150 | 0     | Open | ; |
| 30533              | 18836 |     | 23030 |      |   |
| 36.7663221749501   | 200   | 150 | 0     | Open | ; |
| 30534              | 24411 |     | 24422 |      |   |
| 36.7688361559579   | 75    | 150 | 0     | Open | ; |
| 30535              | 20007 |     | 18884 |      |   |
| 36.7734588510559   | 160   | 150 | 0     | Open | ; |
| 30536              | 24891 |     | 24892 |      |   |
| 36.8268047856163   | 75    | 150 | 0     | Open | ; |
| 30537              | 20233 |     | 20234 |      |   |
| 36.8474350326994   | 125   | 140 | 0     | Open | ; |
| 30538              | 23586 |     | 23587 |      |   |
| 36.869708517038 75 |       | 140 | 0     | Open | ; |
| 30539              | 20749 |     | 20750 |      |   |
| 36.9573292814207   | 250   | 150 | 0     | Open | ; |
| 30540              | 18882 |     | 18883 |      |   |
| 36.8924752725712   | 140   | 150 | 0     | Open | ; |
| 30541              | 18790 |     | 18791 |      |   |
| 36.9086745743497   | 110   | 150 | 0     | Open | ; |
| 30542              | 20603 |     | 20478 |      |   |
| 36.9409547559995   | 200   | 150 | 0     | Open | ; |
| 30543              | 20097 |     | 20101 |      |   |
| 37.3556486437588   | 200   | 150 | 0     | Open | ; |
| 30544              | 24409 |     | 24410 |      |   |
| 36.9650628168446   | 110   | 150 | 0     | Open | ; |
| 30545              | 20807 |     | 23434 |      |   |
| 36.96999557152 160 |       | 150 | 0     | Open | ; |
| 30546              | 19928 |     | 19454 |      |   |
| 36.9700518559412   | 110   | 150 | 0     | Open | ; |
| 30547              | 21942 |     | 18694 |      |   |
| 36.9759164771349   | 160   | 150 | 0     | Open | ; |
| 30548              | 19573 |     | 21644 |      |   |
| 36.9772806958375   | 100   | 140 | 0     | Open | ; |
| 30549              | 23207 |     | 23076 |      |   |
| 36.9980935679234   | 100   | 140 | 0     | Open | ; |
| 30550              | 18810 |     | 18808 |      |   |
| 36.9975039557356   | 125   | 150 | 0     | Open | ; |
| 30551              | 22035 |     | 22036 |      |   |
| 36.9972747644269   | 160   | 150 | 0     | Open | ; |
| 30552              | 20048 |     | 20631 |      |   |
| 36.9976956663355   | 125   | 150 | 0     | Open | ; |
| 30553              | 21335 |     | 21336 |      |   |
| 36.9977714195076   | 125   | 150 | 0     | Open | ; |
| 30554              | 23798 |     | 19546 |      |   |
| 36.9977869370239   | 125   | 150 | 0     | Open | ; |
| 30555              | 22954 |     | 22153 |      |   |

|                  |       |     |       |      |   |
|------------------|-------|-----|-------|------|---|
| 36.9978079920136 | 160   | 150 | 0     | Open | ; |
| 30556            | 20490 |     | 22712 |      |   |
| 36.9978398405206 | 110   | 150 | 0     | Open | ; |
| 30557            | 18805 |     | 21332 |      |   |
| 36.9978593413857 | 125   | 150 | 0     | Open | ; |
| 30558            | 18569 |     | 22228 |      |   |
| 36.9978600323189 | 110   | 150 | 0     | Open | ; |
| 30559            | 18495 |     | 21726 |      |   |
| 36.9978823389857 | 160   | 150 | 0     | Open | ; |
| 30560            | 20037 |     | 22404 |      |   |
| 36.9979017165949 | 100   | 140 | 0     | Open | ; |
| 30561            | 18674 |     | 18675 |      |   |
| 36.9979022148848 | 100   | 140 | 0     | Open | ; |
| 30562            | 20494 |     | 22787 |      |   |
| 36.9979031009063 | 110   | 150 | 0     | Open | ; |
| 30563            | 20091 |     | 20875 |      |   |
| 36.9979450511684 | 200   | 150 | 0     | Open | ; |
| 30564            | 18693 |     | 21502 |      |   |
| 36.9979984865409 | 125   | 150 | 0     | Open | ; |
| 30565            | 21495 |     | 21496 |      |   |
| 36.9980787093353 | 110   | 150 | 0     | Open | ; |
| 30566            | 23077 |     | 23056 |      |   |
| 36.9983121852246 | 100   | 140 | 0     | Open | ; |
| 30567            | 19758 |     | 22280 |      |   |
| 36.9995026165272 | 75    | 150 | 0     | Open | ; |
| 30568            | 21969 |     | 22773 |      |   |
| 36.9997251009972 | 125   | 140 | 0     | Open | ; |
| 30569            | 21753 |     | 21754 |      |   |
| 37.00805003887   | 75    | 140 | 0     | Open | ; |
| 30570            | 20185 |     | 22608 |      |   |
| 37.0266785031969 | 110   | 150 | 0     | Open | ; |
| 30571            | 21762 |     | 20340 |      |   |
| 37.0291022179008 | 110   | 150 | 0     | Open | ; |
| 30572            | 23364 |     | 23371 |      |   |
| 38.9978522213734 | 110   | 150 | 0     | Open | ; |
| 30573            | 22720 |     | 22721 |      |   |
| 37.0445842051214 | 75    | 150 | 0     | Open | ; |
| 30574            | 23299 |     | 20007 |      |   |
| 37.0507765936448 | 160   | 150 | 0     | Open | ; |
| 30575            | 20099 |     | 19888 |      |   |
| 37.0632037828877 | 200   | 150 | 0     | Open | ; |
| 30576            | 24923 |     | 24924 |      |   |
| 37.0665433867449 | 110   | 150 | 0     | Open | ; |
| 30577            | 22031 |     | 22032 |      |   |
| 37.0909697331066 | 100   | 140 | 0     | Open | ; |
| 30578            | 20679 |     | 18570 |      |   |
| 37.0928523297935 | 110   | 150 | 0     | Open | ; |
| 30579            | 22196 |     | 23115 |      |   |
| 37.0979874930893 | 110   | 150 | 0     | Open | ; |
| 30580            | 21747 |     | 21748 |      |   |

|                     |       |     |       |      |   |
|---------------------|-------|-----|-------|------|---|
| 37.1728074011027    | 100   | 140 | 0     | Open | ; |
| 30581               | 20943 |     | 22619 |      |   |
| 37.1843291256516    | 110   | 150 | 0     | Open | ; |
| 30582               | 23164 |     | 24429 |      |   |
| 37.1889008779101    | 110   | 150 | 0     | Open | ; |
| 30583               | 22430 |     | 20572 |      |   |
| 37.205646651197 75  |       | 150 | 0     | Open | ; |
| 30584               | 20077 |     | 20078 |      |   |
| 37.2371311714704    | 160   | 150 | 0     | Open | ; |
| 30585               | 20836 |     | 20577 |      |   |
| 37.2524216875317    | 160   | 150 | 0     | Open | ; |
| 30586               | 22661 |     | 23357 |      |   |
| 37.2977212091424    | 150   | 140 | 0     | Open | ; |
| 30587               | 24758 |     | 24768 |      |   |
| 37.307745166425 110 |       | 150 | 0     | Open | ; |
| 30588               | 23902 |     | 24195 |      |   |
| 37.3178542952999    | 100   | 140 | 0     | Open | ; |
| 30589               | 21281 |     | 21282 |      |   |
| 37.3257869109576    | 110   | 150 | 0     | Open | ; |
| 30590               | 19302 |     | 23311 |      |   |
| 37.3343001027181    | 110   | 150 | 0     | Open | ; |
| 30591               | 23956 |     | 24292 |      |   |
| 37.3451433646429    | 100   | 140 | 0     | Open | ; |
| 30592               | 20386 |     | 20480 |      |   |
| 37.3620284066329    | 125   | 150 | 0     | Open | ; |
| 30593               | 19838 |     | 19010 |      |   |
| 37.3662842292895    | 160   | 150 | 0     | Open | ; |
| 30594               | 18571 |     | 22465 |      |   |
| 37.6102635046551    | 110   | 150 | 0     | Open | ; |
| 30595               | 21696 |     | 19922 |      |   |
| 37.4458420931713    | 140   | 150 | 0     | Open | ; |
| 30596               | 24450 |     | 24451 |      |   |
| 37.4811227540847    | 110   | 150 | 0     | Open | ; |
| 30597               | 20338 |     | 19649 |      |   |
| 37.4843002402866    | 160   | 150 | 0     | Open | ; |
| 30598               | 24452 |     | 24453 |      |   |
| 37.4863947976443    | 75    | 150 | 0     | Open | ; |
| 30599               | 18930 |     | 18931 |      |   |
| 37.4964347710548    | 200   | 150 | 0     | Open | ; |
| 30600               | 19502 |     | 19503 |      |   |
| 37.5114724006862    | 110   | 150 | 0     | Open | ; |
| 30601               | 23599 |     | 23600 |      |   |
| 37.5198219125785    | 75    | 140 | 0     | Open | ; |
| 30602               | 23817 |     | 19877 |      |   |
| 37.562725244827 160 |       | 150 | 0     | Open | ; |
| 30603               | 18525 |     | 22628 |      |   |
| 37.5721205349778    | 160   | 150 | 0     | Open | ; |
| 30604               | 19753 |     | 19754 |      |   |
| 37.5958494574255    | 75    | 140 | 0     | Open | ; |
| 30605               | 21038 |     | 23308 |      |   |

|                  |       |     |       |      |   |
|------------------|-------|-----|-------|------|---|
| 37.5992888211441 | 200   | 150 | 0     | Open | ; |
| 30606            | 22655 |     | 22657 |      |   |
| 37.5994773558008 | 110   | 150 | 0     | Open | ; |
| 30607            | 24479 |     | 24466 |      |   |
| 37.6146169679337 | 140   | 150 | 0     | Open | ; |
| 30608            | 24821 |     | 23299 |      |   |
| 45.7206873196937 | 160   | 150 | 0     | Open | ; |
| 30609            | 18936 |     | 20356 |      |   |
| 46.0027244962921 | 110   | 150 | 0     | Open | ; |
| 30610            | 20332 |     | 20707 |      |   |
| 37.7249740851212 | 200   | 150 | 0     | Open | ; |
| 30611            | 20202 |     | 20842 |      |   |
| 37.7327775397088 | 150   | 140 | 0     | Open | ; |
| 30612            | 20674 |     | 20677 |      |   |
| 37.7353567673319 | 125   | 150 | 0     | Open | ; |
| 30613            | 23088 |     | 23089 |      |   |
| 37.7358865053171 | 110   | 150 | 0     | Open | ; |
| 30614            | 22059 |     | 22060 |      |   |
| 37.7656360409143 | 100   | 140 | 0     | Open | ; |
| 30615            | 21525 |     | 18692 |      |   |
| 45.0704840847307 | 125   | 150 | 0     | Open | ; |
| 30616            | 18594 |     | 21985 |      |   |
| 37.7951820704569 | 110   | 150 | 0     | Open | ; |
| 30617            | 22784 |     | 22738 |      |   |
| 37.7978303457478 | 110   | 150 | 0     | Open | ; |
| 30618            | 22878 |     | 20334 |      |   |
| 37.7977475833627 | 110   | 150 | 0     | Open | ; |
| 30619            | 22879 |     | 20307 |      |   |
| 37.7977423106748 | 110   | 150 | 0     | Open | ; |
| 30621            | 22744 |     | 22784 |      |   |
| 37.7977705285282 | 110   | 150 | 0     | Open | ; |
| 30622            | 20307 |     | 22878 |      |   |
| 37.8018965097    | 110   | 150 | 0     | Open | ; |
| 30623            | 20334 |     | 21617 |      |   |
| 37.7978664653067 | 110   | 150 | 0     | Open | ; |
| 30624            | 22738 |     | 22739 |      |   |
| 37.7980273778127 | 110   | 150 | 0     | Open | ; |
| 30626            | 24668 |     | 24669 |      |   |
| 37.8249569563714 | 110   | 150 | 0     | Open | ; |
| 30627            | 19835 |     | 19836 |      |   |
| 37.8360401663695 | 75    | 140 | 0     | Open | ; |
| 30629            | 23526 |     | 23527 |      |   |
| 37.846886487904  | 75    | 140 | 0     | Open | ; |
| 30630            | 23215 |     | 22880 |      |   |
| 37.8583797177996 | 110   | 150 | 0     | Open | ; |
| 30631            | 24417 |     | 24418 |      |   |
| 37.8478340077314 | 110   | 150 | 0     | Open | ; |
| 30632            | 19616 |     | 22504 |      |   |
| 37.862858937213  | 125   | 150 | 0     | Open | ; |
| 30633            | 22898 |     | 19673 |      |   |

|                  |       |     |       |      |   |
|------------------|-------|-----|-------|------|---|
| 37.8788601587547 | 200   | 150 | 0     | Open | ; |
| 30634            | 21951 |     | 21952 |      |   |
| 37.9021208897417 | 90    | 150 | 0     | Open | ; |
| 30635            | 24742 |     | 24738 |      |   |
| 37.9029865597419 | 110   | 150 | 0     | Open | ; |
| 30636            | 23810 |     | 18754 |      |   |
| 37.9124145738743 | 100   | 140 | 0     | Open | ; |
| 30637            | 21319 |     | 21320 |      |   |
| 37.919714092473  | 150   | 140 | 0     | Open | ; |
| 30638            | 24863 |     | 21083 |      |   |
| 37.9197230792147 | 125   | 150 | 0     | Open | ; |
| 30639            | 23628 |     | 21789 |      |   |
| 37.9319857675464 | 75    | 140 | 0     | Open | ; |
| 30640            | 24406 |     | 24412 |      |   |
| 37.9415578470046 | 160   | 150 | 0     | Open | ; |
| 30641            | 21579 |     | 21580 |      |   |
| 37.9478547954695 | 110   | 150 | 0     | Open | ; |
| 30642            | 22740 |     | 22741 |      |   |
| 37.9478547968191 | 110   | 150 | 0     | Open | ; |
| 30643            | 20755 |     | 20642 |      |   |
| 37.9541474534085 | 200   | 150 | 0     | Open | ; |
| 30644            | 21227 |     | 19418 |      |   |
| 37.9753153928343 | 110   | 150 | 0     | Open | ; |
| 30645            | 18791 |     | 18792 |      |   |
| 37.9763505966991 | 110   | 150 | 0     | Open | ; |
| 30646            | 24447 |     | 24448 |      |   |
| 37.9766872379633 | 110   | 150 | 0     | Open | ; |
| 30647            | 19085 |     | 19086 |      |   |
| 37.9803199609082 | 75    | 150 | 0     | Open | ; |
| 30648            | 19577 |     | 23649 |      |   |
| 37.9830130520969 | 200   | 150 | 0     | Open | ; |
| 30649            | 19644 |     | 21853 |      |   |
| 37.9858218436182 | 75    | 150 | 0     | Open | ; |
| 30650            | 20119 |     | 20120 |      |   |
| 37.9859482229403 | 200   | 150 | 0     | Open | ; |
| 30651            | 19416 |     | 19849 |      |   |
| 37.9925191287779 | 160   | 150 | 0     | Open | ; |
| 30652            | 22425 |     | 19576 |      |   |
| 37.9969804750008 | 75    | 140 | 0     | Open | ; |
| 30653            | 23602 |     | 23603 |      |   |
| 37.9976268802746 | 75    | 150 | 0     | Open | ; |
| 30654            | 20876 |     | 20877 |      |   |
| 37.9976284277171 | 75    | 150 | 0     | Open | ; |
| 30655            | 23124 |     | 23125 |      |   |
| 37.9976880312495 | 75    | 140 | 0     | Open | ; |
| 30656            | 18620 |     | 18623 |      |   |
| 37.9977023407123 | 75    | 140 | 0     | Open | ; |
| 30657            | 19632 |     | 22449 |      |   |
| 37.9977182602849 | 140   | 150 | 0     | Open | ; |
| 30658            | 22205 |     | 22388 |      |   |

|                     |       |     |       |      |   |
|---------------------|-------|-----|-------|------|---|
| 37.997718256652 110 |       | 150 | 0     | Open | ; |
| 30659               | 21019 |     | 23604 |      |   |
| 37.9977268024853    | 75    | 150 | 0     | Open | ; |
| 30660               | 22920 |     | 22921 |      |   |
| 37.9977279485064    | 75    | 140 | 0     | Open | ; |
| 30661               | 22936 |     | 22937 |      |   |
| 37.9977346324732    | 75    | 150 | 0     | Open | ; |
| 30662               | 24169 |     | 25708 |      |   |
| 37.9977424437554    | 75    | 150 | 0     | Open | ; |
| 30663               | 19643 |     | 23249 |      |   |
| 37.9977438054047    | 75    | 150 | 0     | Open | ; |
| 30664               | 20260 |     | 24975 |      |   |
| 37.9977671497759    | 75    | 140 | 0     | Open | ; |
| 30665               | 19115 |     | 19116 |      |   |
| 37.9978047910161    | 75    | 140 | 0     | Open | ; |
| 30666               | 23649 |     | 20054 |      |   |
| 37.9978285520338    | 200   | 150 | 0     | Open | ; |
| 30667               | 20642 |     | 19577 |      |   |
| 37.9978394959357    | 200   | 150 | 0     | Open | ; |
| 30668               | 18676 |     | 18677 |      |   |
| 37.9978508149048    | 125   | 150 | 0     | Open | ; |
| 30669               | 23248 |     | 19172 |      |   |
| 37.9978740611822    | 110   | 150 | 0     | Open | ; |
| 30670               | 20130 |     | 18670 |      |   |
| 37.9979111872073    | 160   | 150 | 0     | Open | ; |
| 30671               | 22681 |     | 23108 |      |   |
| 37.9982323629475    | 75    | 140 | 0     | Open | ; |
| 30672               | 22938 |     | 22939 |      |   |
| 37.998965474713 75  |       | 150 | 0     | Open | ; |
| 30673               | 23537 |     | 20889 |      |   |
| 38.0043741729697    | 110   | 150 | 0     | Open | ; |
| 30674               | 21659 |     | 19718 |      |   |
| 38.0057018044634    | 250   | 140 | 0     | Open | ; |
| 30675               | 20885 |     | 20117 |      |   |
| 38.0071086154413    | 200   | 150 | 0     | Open | ; |
| 30676               | 22657 |     | 21791 |      |   |
| 38.0066131690389    | 110   | 150 | 0     | Open | ; |
| 30677               | 18720 |     | 18721 |      |   |
| 38.0150416189441    | 75    | 140 | 0     | Open | ; |
| 30678               | 20158 |     | 21314 |      |   |
| 38.0282193753741    | 110   | 150 | 0     | Open | ; |
| 30679               | 20121 |     | 20119 |      |   |
| 38.0278453570117    | 200   | 150 | 0     | Open | ; |
| 30680               | 24395 |     | 24415 |      |   |
| 38.0331910489393    | 160   | 150 | 0     | Open | ; |
| 30681               | 24626 |     | 24618 |      |   |
| 38.0337357261398    | 110   | 150 | 0     | Open | ; |
| 30682               | 24004 |     | 24005 |      |   |
| 38.0402310399314    | 75    | 150 | 0     | Open | ; |
| 30683               | 20641 |     | 24533 |      |   |

|                     |       |     |       |      |   |
|---------------------|-------|-----|-------|------|---|
| 38.0417790175809    | 160   | 150 | 0     | Open | ; |
| 30684               | 23687 |     | 23688 |      |   |
| 38.0497315278818    | 110   | 150 | 0     | Open | ; |
| 30685               | 19630 |     | 22981 |      |   |
| 38.0541416461374    | 200   | 150 | 0     | Open | ; |
| 30686               | 22200 |     | 22623 |      |   |
| 38.101462348646 140 |       | 150 | 0     | Open | ; |
| 30687               | 24577 |     | 24578 |      |   |
| 38.1087009126871    | 110   | 150 | 0     | Open | ; |
| 30688               | 23190 |     | 23406 |      |   |
| 41.5410104309474    | 160   | 150 | 0     | Open | ; |
| 30689               | 21683 |     | 18591 |      |   |
| 38.151042644772 160 |       | 150 | 0     | Open | ; |
| 30690               | 20889 |     | 22043 |      |   |
| 38.1536977576809    | 110   | 150 | 0     | Open | ; |
| 30691               | 22368 |     | 22548 |      |   |
| 39.1721411845265    | 160   | 150 | 0     | Open | ; |
| 30692               | 22043 |     | 23243 |      |   |
| 38.1913170504873    | 110   | 150 | 0     | Open | ; |
| 30693               | 20559 |     | 20560 |      |   |
| 38.2244526301987    | 160   | 150 | 0     | Open | ; |
| 30694               | 20314 |     | 20315 |      |   |
| 38.2476628893814    | 160   | 150 | 0     | Open | ; |
| 30695               | 20815 |     | 20816 |      |   |
| 38.2476628902879    | 110   | 150 | 0     | Open | ; |
| 30696               | 24447 |     | 24442 |      |   |
| 39.8196296093363    | 110   | 150 | 0     | Open | ; |
| 30697               | 24360 |     | 24355 |      |   |
| 38.2642842515787    | 125   | 150 | 0     | Open | ; |
| 30698               | 23279 |     | 19512 |      |   |
| 38.2841365835326    | 100   | 140 | 0     | Open | ; |
| 30699               | 22598 |     | 21847 |      |   |
| 38.2902477502092    | 160   | 150 | 0     | Open | ; |
| 30700               | 25031 |     | 25049 |      |   |
| 54.0400842401191    | 200   | 140 | 0     | Open | ; |
| 30701               | 21091 |     | 18491 |      |   |
| 38.2977588951161    | 160   | 150 | 0     | Open | ; |
| 30702               | 21325 |     | 21326 |      |   |
| 38.3007007374134    | 100   | 140 | 0     | Open | ; |
| 30703               | 23647 |     | 22512 |      |   |
| 45.7147477834426    | 110   | 150 | 0     | Open | ; |
| 30704               | 20645 |     | 20646 |      |   |
| 38.3256331934028    | 75    | 140 | 0     | Open | ; |
| 30705               | 21930 |     | 21931 |      |   |
| 38.3325152562437    | 75    | 150 | 0     | Open | ; |
| 30706               | 22682 |     | 19585 |      |   |
| 38.3553923669827    | 110   | 150 | 0     | Open | ; |
| 30707               | 18857 |     | 19239 |      |   |
| 38.3883998639086    | 110   | 150 | 0     | Open | ; |
| 30708               | 20484 |     | 21058 |      |   |



|                     |       |     |       |      |   |
|---------------------|-------|-----|-------|------|---|
| 38.4078309286398    | 160   | 150 | 0     | Open | ; |
| 30709               | 20574 |     | 20967 |      |   |
| 38.4279753145329    | 75    | 150 | 0     | Open | ; |
| 30710               | 21847 |     | 21848 |      |   |
| 38.4452649596228    | 160   | 150 | 0     | Open | ; |
| 30711               | 22809 |     | 20033 |      |   |
| 38.4477289125546    | 150   | 140 | 0     | Open | ; |
| 30712               | 24775 |     | 24776 |      |   |
| 38.4608711720562    | 110   | 150 | 0     | Open | ; |
| 30713               | 22313 |     | 22756 |      |   |
| 38.6122241048196    | 110   | 150 | 0     | Open | ; |
| 30714               | 21334 |     | 21335 |      |   |
| 38.4930509472217    | 125   | 150 | 0     | Open | ; |
| 30715               | 21550 |     | 21310 |      |   |
| 38.4975591654923    | 160   | 150 | 0     | Open | ; |
| 30716               | 20682 |     | 20683 |      |   |
| 38.4978650488089    | 110   | 150 | 0     | Open | ; |
| 30717               | 20064 |     | 22995 |      |   |
| 38.4980764164382    | 125   | 140 | 0     | Open | ; |
| 30718               | 24355 |     | 20675 |      |   |
| 40.4598854113685    | 125   | 150 | 0     | Open | ; |
| 30719               | 23293 |     | 25141 |      |   |
| 42.1514249635299    | 100   | 140 | 0     | Open | ; |
| 30720               | 22913 |     | 22914 |      |   |
| 38.5272138463169    | 125   | 140 | 0     | Open | ; |
| 30722               | 23165 |     | 24885 |      |   |
| 38.5738455886121    | 110   | 150 | 0     | Open | ; |
| 30723               | 18978 |     | 23246 |      |   |
| 38.5812964020567    | 200   | 150 | 0     | Open | ; |
| 30724               | 23246 |     | 21038 |      |   |
| 38.581445767727 200 |       | 150 | 0     | Open | ; |
| 30725               | 22679 |     | 23363 |      |   |
| 38.5879991478692    | 160   | 150 | 0     | Open | ; |
| 30726               | 18589 |     | 20674 |      |   |
| 38.5996862262835    | 125   | 150 | 0     | Open | ; |
| 30727               | 24800 |     | 24801 |      |   |
| 38.6000028128712    | 110   | 150 | 0     | Open | ; |
| 30728               | 22309 |     | 22310 |      |   |
| 38.6007868672186    | 110   | 150 | 0     | Open | ; |
| 30729               | 21303 |     | 21304 |      |   |
| 38.6234060874873    | 75    | 150 | 0     | Open | ; |
| 30730               | 19317 |     | 19318 |      |   |
| 38.6256760307194    | 75    | 140 | 0     | Open | ; |
| 30731               | 20056 |     | 22239 |      |   |
| 38.6295364406148    | 110   | 150 | 0     | Open | ; |
| 30732               | 19762 |     | 19764 |      |   |
| 38.6365423841593    | 200   | 150 | 0     | Open | ; |
| 30733               | 20078 |     | 22621 |      |   |
| 38.6390742955167    | 160   | 150 | 0     | Open | ; |
| 30734               | 18863 |     | 22253 |      |   |

|                  |       |     |       |      |   |
|------------------|-------|-----|-------|------|---|
| 38.6391258729299 | 110   | 150 | 0     | Open | ; |
| 30735            | 24501 |     | 24614 |      |   |
| 38.6532686400314 | 160   | 150 | 0     | Open | ; |
| 30736            | 22005 |     | 23094 |      |   |
| 38.6544876137019 | 100   | 140 | 0     | Open | ; |
| 30737            | 22905 |     | 22647 |      |   |
| 38.6555855797254 | 100   | 140 | 0     | Open | ; |
| 30738            | 19299 |     | 19401 |      |   |
| 38.6623003704656 | 160   | 150 | 0     | Open | ; |
| 30739            | 22056 |     | 20878 |      |   |
| 38.6654939273236 | 200   | 150 | 0     | Open | ; |
| 30740            | 22801 |     | 22668 |      |   |
| 38.6768795704627 | 75    | 140 | 0     | Open | ; |
| 30741            | 21713 |     | 21714 |      |   |
| 38.7010363105032 | 160   | 150 | 0     | Open | ; |
| 30742            | 20283 |     | 22887 |      |   |
| 38.7018199716133 | 110   | 150 | 0     | Open | ; |
| 30743            | 19700 |     | 20031 |      |   |
| 38.7227656382121 | 100   | 140 | 0     | Open | ; |
| 30744            | 23231 |     | 21243 |      |   |
| 51.7685485136399 | 160   | 150 | 0     | Open | ; |
| 30745            | 19853 |     | 23294 |      |   |
| 38.7297346715435 | 100   | 140 | 0     | Open | ; |
| 30746            | 20120 |     | 23027 |      |   |
| 38.7467909733364 | 200   | 150 | 0     | Open | ; |
| 30747            | 24583 |     | 24585 |      |   |
| 38.7451622619182 | 110   | 150 | 0     | Open | ; |
| 30748            | 22777 |     | 20748 |      |   |
| 39.1896906936909 | 110   | 150 | 0     | Open | ; |
| 30749            | 22837 |     | 22590 |      |   |
| 38.7792480986715 | 75    | 140 | 0     | Open | ; |
| 30751            | 21089 |     | 23260 |      |   |
| 38.8164756912171 | 200   | 150 | 0     | Open | ; |
| 30752            | 20557 |     | 20558 |      |   |
| 40.1495061298845 | 110   | 150 | 0     | Open | ; |
| 30753            | 23186 |     | 23184 |      |   |
| 38.8232544283089 | 110   | 150 | 0     | Open | ; |
| 30754            | 22925 |     | 23564 |      |   |
| 38.8305719903477 | 75    | 140 | 0     | Open | ; |
| 30755            | 22321 |     | 22322 |      |   |
| 38.8458992513701 | 75    | 150 | 0     | Open | ; |
| 30756            | 24968 |     | 21411 |      |   |
| 38.8642932544432 | 100   | 140 | 0     | Open | ; |
| 30757            | 23170 |     | 23188 |      |   |
| 38.8846402451378 | 110   | 150 | 0     | Open | ; |
| 30758            | 22111 |     | 22112 |      |   |
| 38.9062540005429 | 75    | 150 | 0     | Open | ; |
| 30759            | 24228 |     | 24972 |      |   |
| 42.5068029134494 | 90    | 150 | 0     | Open | ; |
| 30760            | 18958 |     | 18959 |      |   |

|                  |       |     |       |      |   |
|------------------|-------|-----|-------|------|---|
| 38.9135576181123 | 110   | 150 | 0     | Open | ; |
| 30761            | 23451 |     | 24035 |      |   |
| 38.94608661298   | 110   | 150 | 0     | Open | ; |
| 30762            | 22638 |     | 22963 |      |   |
| 38.9938058882517 | 110   | 150 | 0     | Open | ; |
| 30763            | 19327 |     | 19328 |      |   |
| 38.9951631672216 | 75    | 150 | 0     | Open | ; |
| 30764            | 21467 |     | 22877 |      |   |
| 38.9951842198068 | 200   | 150 | 0     | Open | ; |
| 30765            | 24435 |     | 24432 |      |   |
| 38.9972925085365 | 110   | 150 | 0     | Open | ; |
| 30766            | 23339 |     | 23340 |      |   |
| 38.9975567653745 | 75    | 140 | 0     | Open | ; |
| 30767            | 19645 |     | 22653 |      |   |
| 38.9977917854071 | 100   | 140 | 0     | Open | ; |
| 30768            | 23268 |     | 19562 |      |   |
| 38.997666966881  | 160   | 150 | 0     | Open | ; |
| 30769            | 22074 |     | 22075 |      |   |
| 38.9976801674258 | 110   | 150 | 0     | Open | ; |
| 30770            | 21333 |     | 21334 |      |   |
| 38.9977170215507 | 125   | 150 | 0     | Open | ; |
| 30771            | 21466 |     | 21467 |      |   |
| 38.9977256258181 | 200   | 150 | 0     | Open | ; |
| 30772            | 19708 |     | 21440 |      |   |
| 38.9977314066523 | 110   | 150 | 0     | Open | ; |
| 30773            | 19597 |     | 19599 |      |   |
| 38.9977490222755 | 160   | 150 | 0     | Open | ; |
| 30774            | 21745 |     | 19329 |      |   |
| 38.9977774324846 | 110   | 150 | 0     | Open | ; |
| 30775            | 18706 |     | 18707 |      |   |
| 38.9979655181903 | 75    | 140 | 0     | Open | ; |
| 30776            | 18820 |     | 18821 |      |   |
| 38.9979950499956 | 75    | 140 | 0     | Open | ; |
| 30777            | 22383 |     | 22384 |      |   |
| 38.9991158790623 | 100   | 140 | 0     | Open | ; |
| 30778            | 24440 |     | 23182 |      |   |
| 39.0033556922206 | 200   | 150 | 0     | Open | ; |
| 30779            | 18804 |     | 18805 |      |   |
| 39.0449691803059 | 125   | 150 | 0     | Open | ; |
| 30780            | 21511 |     | 21509 |      |   |
| 39.0459850149471 | 110   | 150 | 0     | Open | ; |
| 30781            | 23027 |     | 23028 |      |   |
| 39.0905759988432 | 200   | 150 | 0     | Open | ; |
| 30782            | 21507 |     | 21545 |      |   |
| 39.1119616449724 | 110   | 150 | 0     | Open | ; |
| 30783            | 18896 |     | 19403 |      |   |
| 39.1281954237975 | 160   | 150 | 0     | Open | ; |
| 30784            | 22386 |     | 19804 |      |   |
| 39.1497147675345 | 110   | 150 | 0     | Open | ; |
| 30785            | 22886 |     | 22816 |      |   |

|                  |       |     |       |      |   |
|------------------|-------|-----|-------|------|---|
| 39.1870391787401 | 110   | 150 | 0     | Open | ; |
| 30786            | 21118 |     | 21447 |      |   |
| 39.1916770379684 | 100   | 140 | 0     | Open | ; |
| 30787            | 21369 |     | 21370 |      |   |
| 39.269255691423  | 100   | 150 | 0     | Open | ; |
| 30788            | 22592 |     | 22210 |      |   |
| 39.2840503113943 | 110   | 150 | 0     | Open | ; |
| 30789            | 22177 |     | 23247 |      |   |
| 39.3190636951952 | 75    | 140 | 0     | Open | ; |
| 30790            | 21333 |     | 21350 |      |   |
| 39.3334753969519 | 125   | 150 | 0     | Open | ; |
| 30791            | 21972 |     | 20589 |      |   |
| 39.3687867942075 | 75    | 150 | 0     | Open | ; |
| 30792            | 20236 |     | 23403 |      |   |
| 39.3774297385003 | 110   | 150 | 0     | Open | ; |
| 30793            | 22992 |     | 22993 |      |   |
| 43.4807764394368 | 75    | 140 | 0     | Open | ; |
| 30794            | 18700 |     | 18701 |      |   |
| 39.4657901462372 | 110   | 150 | 0     | Open | ; |
| 30795            | 20504 |     | 21060 |      |   |
| 39.4736298412515 | 75    | 140 | 0     | Open | ; |
| 30796            | 20144 |     | 20145 |      |   |
| 39.4765465373764 | 110   | 150 | 0     | Open | ; |
| 30797            | 18970 |     | 20159 |      |   |
| 39.5075012888834 | 75    | 140 | 0     | Open | ; |
| 30798            | 23059 |     | 18849 |      |   |
| 39.5111462225166 | 110   | 150 | 0     | Open | ; |
| 30799            | 24165 |     | 19234 |      |   |
| 40.0947871066937 | 110   | 150 | 0     | Open | ; |
| 30800            | 18827 |     | 24365 |      |   |
| 50.320929165234  | 110   | 150 | 0     | Open | ; |
| 30801            | 18626 |     | 23073 |      |   |
| 39.5256795803286 | 75    | 140 | 0     | Open | ; |
| 30802            | 24706 |     | 24436 |      |   |
| 39.5499611258584 | 110   | 150 | 0     | Open | ; |
| 30803            | 19391 |     | 19392 |      |   |
| 39.5590503470962 | 110   | 150 | 0     | Open | ; |
| 30804            | 22741 |     | 22742 |      |   |
| 39.5872984836604 | 110   | 150 | 0     | Open | ; |
| 30805            | 19382 |     | 19475 |      |   |
| 39.6009697394431 | 75    | 140 | 0     | Open | ; |
| 30806            | 19792 |     | 21962 |      |   |
| 39.6040330672576 | 75    | 140 | 0     | Open | ; |
| 30807            | 21435 |     | 23009 |      |   |
| 39.6148046949523 | 125   | 140 | 0     | Open | ; |
| 30808            | 20552 |     | 20551 |      |   |
| 39.6478181870574 | 110   | 150 | 0     | Open | ; |
| 30809            | 21957 |     | 20552 |      |   |
| 39.6479416428141 | 110   | 150 | 0     | Open | ; |
| 30810            | 24835 |     | 24569 |      |   |

|                     |       |     |       |      |   |
|---------------------|-------|-----|-------|------|---|
| 39.6694158712622    | 75    | 150 | 0     | Open | ; |
| 30811               | 24636 |     | 24604 |      |   |
| 39.6729412562155    | 100   | 140 | 0     | Open | ; |
| 30812               | 22266 |     | 22267 |      |   |
| 39.6886461336989    | 110   | 150 | 0     | Open | ; |
| 30813               | 19274 |     | 19204 |      |   |
| 39.692932564716 110 |       | 150 | 0     | Open | ; |
| 30814               | 19074 |     | 18764 |      |   |
| 39.703530329528 125 |       | 150 | 0     | Open | ; |
| 30815               | 23023 |     | 22106 |      |   |
| 39.7107638351658    | 110   | 150 | 0     | Open | ; |
| 30816               | 22335 |     | 22358 |      |   |
| 39.7182246210955    | 110   | 150 | 0     | Open | ; |
| 30817               | 22357 |     | 20793 |      |   |
| 39.7503851132491    | 125   | 150 | 0     | Open | ; |
| 30818               | 20412 |     | 23646 |      |   |
| 39.772438903173 110 |       | 150 | 0     | Open | ; |
| 30819               | 24827 |     | 24828 |      |   |
| 39.7735625175716    | 110   | 150 | 0     | Open | ; |
| 30820               | 18555 |     | 20236 |      |   |
| 39.7770659921039    | 110   | 150 | 0     | Open | ; |
| 30821               | 21830 |     | 21831 |      |   |
| 39.7855086695949    | 100   | 140 | 0     | Open | ; |
| 30822               | 23591 |     | 23589 |      |   |
| 39.7947469903381    | 250   | 100 | 0     | Open | ; |
| 30823               | 18588 |     | 18589 |      |   |
| 39.7981534186218    | 125   | 150 | 0     | Open | ; |
| 30824               | 23535 |     | 21297 |      |   |
| 39.8012553478995    | 160   | 150 | 0     | Open | ; |
| 30825               | 21926 |     | 21927 |      |   |
| 39.8094795159493    | 110   | 150 | 0     | Open | ; |
| 30826               | 21379 |     | 21378 |      |   |
| 39.8117052436512    | 140   | 150 | 0     | Open | ; |
| 30827               | 18668 |     | 20490 |      |   |
| 39.81776130859 110  |       | 150 | 0     | Open | ; |
| 30828               | 24451 |     | 24882 |      |   |
| 39.8185122543328    | 110   | 150 | 0     | Open | ; |
| 30829               | 21500 |     | 21501 |      |   |
| 39.8365508920569    | 160   | 150 | 0     | Open | ; |
| 30830               | 23555 |     | 23556 |      |   |
| 39.8401759808953    | 75    | 140 | 0     | Open | ; |
| 30831               | 19139 |     | 19140 |      |   |
| 40.7407678690593    | 125   | 150 | 0     | Open | ; |
| 30832               | 20186 |     | 20185 |      |   |
| 39.8602214568961    | 110   | 150 | 0     | Open | ; |
| 30833               | 19303 |     | 19304 |      |   |
| 39.8633044636392    | 75    | 150 | 0     | Open | ; |
| 30834               | 20531 |     | 20532 |      |   |
| 41.8304994285394    | 90    | 150 | 0     | Open | ; |
| 30835               | 19255 |     | 19256 |      |   |

|                  |       |     |       |      |   |
|------------------|-------|-----|-------|------|---|
| 41.8511366187468 | 75    | 140 | 0     | Open | ; |
| 30836            | 21739 |     | 21740 |      |   |
| 41.8579145192638 | 160   | 150 | 0     | Open | ; |
| 30837            | 20210 |     | 20124 |      |   |
| 41.8672424574777 | 75    | 140 | 0     | Open | ; |
| 30838            | 22763 |     | 23778 |      |   |
| 41.8753879696231 | 110   | 150 | 0     | Open | ; |
| 30839            | 21106 |     | 21107 |      |   |
| 41.8840053747494 | 100   | 140 | 0     | Open | ; |
| 30840            | 24468 |     | 24469 |      |   |
| 41.9112541298564 | 140   | 150 | 0     | Open | ; |
| 30841            | 23857 |     | 23302 |      |   |
| 41.9176159370928 | 110   | 150 | 0     | Open | ; |
| 30842            | 23285 |     | 23286 |      |   |
| 41.9345250279997 | 75    | 140 | 0     | Open | ; |
| 30843            | 22532 |     | 23187 |      |   |
| 41.9345779402722 | 110   | 150 | 0     | Open | ; |
| 30844            | 24530 |     | 24531 |      |   |
| 41.9404542738999 | 110   | 150 | 0     | Open | ; |
| 30845            | 19042 |     | 23000 |      |   |
| 41.9441590822331 | 100   | 140 | 0     | Open | ; |
| 30846            | 22823 |     | 23880 |      |   |
| 41.9697422479721 | 160   | 150 | 0     | Open | ; |
| 30847            | 19193 |     | 19194 |      |   |
| 41.985075774904  | 75    | 140 | 0     | Open | ; |
| 30848            | 19272 |     | 19269 |      |   |
| 41.9925678468106 | 110   | 150 | 0     | Open | ; |
| 30849            | 19254 |     | 18678 |      |   |
| 41.9945185918516 | 160   | 150 | 0     | Open | ; |
| 30850            | 24567 |     | 20665 |      |   |
| 41.9965700418783 | 110   | 150 | 0     | Open | ; |
| 30851            | 20631 |     | 20050 |      |   |
| 41.997165453254  | 125   | 150 | 0     | Open | ; |
| 30852            | 19343 |     | 22972 |      |   |
| 41.9972498180816 | 100   | 140 | 0     | Open | ; |
| 30853            | 21520 |     | 21521 |      |   |
| 41.9974905088136 | 75    | 150 | 0     | Open | ; |
| 30854            | 21448 |     | 21449 |      |   |
| 41.9975511465428 | 100   | 140 | 0     | Open | ; |
| 30855            | 21487 |     | 21488 |      |   |
| 41.9975586579572 | 150   | 140 | 0     | Open | ; |
| 30856            | 23366 |     | 21544 |      |   |
| 41.9975698678996 | 160   | 150 | 0     | Open | ; |
| 30857            | 19716 |     | 19717 |      |   |
| 41.9975721765833 | 200   | 150 | 0     | Open | ; |
| 30858            | 21912 |     | 21527 |      |   |
| 41.9975829356181 | 110   | 150 | 0     | Open | ; |
| 30859            | 22036 |     | 23761 |      |   |
| 41.9975877666192 | 160   | 150 | 0     | Open | ; |
| 30860            | 22579 |     | 18473 |      |   |

|                  |       |     |       |      |   |
|------------------|-------|-----|-------|------|---|
| 41.9976176567378 | 125   | 150 | 0     | Open | ; |
| 30861            | 19902 |     | 21160 |      |   |
| 41.997618323486  | 125   | 150 | 0     | Open | ; |
| 30862            | 23273 |     | 22380 |      |   |
| 41.9976561767063 | 160   | 150 | 0     | Open | ; |
| 30863            | 20754 |     | 20924 |      |   |
| 41.9976561774739 | 160   | 150 | 0     | Open | ; |
| 30864            | 22305 |     | 20590 |      |   |
| 41.9976568450309 | 140   | 150 | 0     | Open | ; |
| 30865            | 20879 |     | 23391 |      |   |
| 41.9976869102862 | 75    | 140 | 0     | Open | ; |
| 30866            | 22541 |     | 18986 |      |   |
| 41.9977020829559 | 125   | 150 | 0     | Open | ; |
| 30867            | 23019 |     | 19645 |      |   |
| 41.9977826506414 | 100   | 140 | 0     | Open | ; |
| 30868            | 21622 |     | 21620 |      |   |
| 41.9978596486341 | 100   | 140 | 0     | Open | ; |
| 30869            | 22408 |     | 18564 |      |   |
| 41.9979275638851 | 75    | 150 | 0     | Open | ; |
| 30870            | 19342 |     | 19343 |      |   |
| 41.9980207423944 | 100   | 140 | 0     | Open | ; |
| 30871            | 18701 |     | 18889 |      |   |
| 42.0117807023024 | 110   | 150 | 0     | Open | ; |
| 30872            | 23847 |     | 23605 |      |   |
| 42.0154909115099 | 160   | 150 | 0     | Open | ; |
| 30873            | 24839 |     | 24840 |      |   |
| 42.0164292619382 | 75    | 150 | 0     | Open | ; |
| 30874            | 21767 |     | 19932 |      |   |
| 43.9945503918586 | 125   | 140 | 0     | Open | ; |
| 30875            | 21492 |     | 23685 |      |   |
| 42.0270607214037 | 100   | 140 | 0     | Open | ; |
| 30876            | 21831 |     | 23032 |      |   |
| 42.0279257186572 | 100   | 140 | 0     | Open | ; |
| 30877            | 20580 |     | 24266 |      |   |
| 51.1362181310116 | 75    | 150 | 0     | Open | ; |
| 30878            | 22696 |     | 22697 |      |   |
| 42.0432965048153 | 100   | 140 | 0     | Open | ; |
| 30879            | 22153 |     | 22154 |      |   |
| 42.0731506434055 | 160   | 150 | 0     | Open | ; |
| 30880            | 21432 |     | 21262 |      |   |
| 42.1295348381304 | 100   | 140 | 0     | Open | ; |
| 30881            | 23326 |     | 22671 |      |   |
| 42.1419716241948 | 200   | 150 | 0     | Open | ; |
| 30883            | 23102 |     | 21322 |      |   |
| 42.1493954240206 | 100   | 140 | 0     | Open | ; |
| 30884            | 24478 |     | 24559 |      |   |
| 42.1656479802277 | 140   | 150 | 0     | Open | ; |
| 30885            | 21286 |     | 21287 |      |   |
| 42.1663298306565 | 100   | 150 | 0     | Open | ; |
| 30886            | 24569 |     | 24570 |      |   |

|                     |       |     |       |      |   |
|---------------------|-------|-----|-------|------|---|
| 42.1749275300173    | 140   | 150 | 0     | Open | ; |
| 30887               | 23237 |     | 22983 |      |   |
| 50.1128191983644    | 100   | 140 | 0     | Open | ; |
| 30888               | 21900 |     | 18600 |      |   |
| 42.2065156543411    | 200   | 150 | 0     | Open | ; |
| 30889               | 22707 |     | 22356 |      |   |
| 42.2307110587522    | 110   | 150 | 0     | Open | ; |
| 30890               | 23005 |     | 21920 |      |   |
| 52.5467586290597    | 75    | 150 | 0     | Open | ; |
| 30891               | 22028 |     | 18541 |      |   |
| 42.2415414979349    | 110   | 150 | 0     | Open | ; |
| 30892               | 20701 |     | 20331 |      |   |
| 42.2426138295319    | 200   | 150 | 0     | Open | ; |
| 30893               | 23775 |     | 23776 |      |   |
| 42.2458967375596    | 90    | 150 | 0     | Open | ; |
| 30894               | 24873 |     | 24874 |      |   |
| 42.2497149130019    | 75    | 150 | 0     | Open | ; |
| 30895               | 23002 |     | 19046 |      |   |
| 42.2506745881371    | 100   | 140 | 0     | Open | ; |
| 30896               | 24415 |     | 24406 |      |   |
| 42.2865156508495    | 160   | 150 | 0     | Open | ; |
| 30897               | 18887 |     | 18888 |      |   |
| 42.3023928546093    | 75    | 150 | 0     | Open | ; |
| 30898               | 24825 |     | 24890 |      |   |
| 42.326774015776 110 |       | 150 | 0     | Open | ; |
| 30899               | 19759 |     | 20109 |      |   |
| 42.3235452951839    | 200   | 150 | 0     | Open | ; |
| 30900               | 19196 |     | 22299 |      |   |
| 44.0374432267057    | 125   | 140 | 0     | Open | ; |
| 30901               | 21505 |     | 21511 |      |   |
| 42.3520253417554    | 110   | 150 | 0     | Open | ; |
| 30902               | 21848 |     | 22896 |      |   |
| 42.3680383835031    | 160   | 150 | 0     | Open | ; |
| 30903               | 18590 |     | 18591 |      |   |
| 42.3682968689256    | 160   | 150 | 0     | Open | ; |
| 30904               | 22369 |     | 20788 |      |   |
| 42.3746206663354    | 110   | 150 | 0     | Open | ; |
| 30905               | 23031 |     | 20643 |      |   |
| 42.3787251994822    | 100   | 140 | 0     | Open | ; |
| 30906               | 22202 |     | 22623 |      |   |
| 44.4805353552276    | 200   | 150 | 0     | Open | ; |
| 30907               | 22179 |     | 23545 |      |   |
| 42.3947588687365    | 150   | 140 | 0     | Open | ; |
| 30908               | 22805 |     | 20831 |      |   |
| 42.4076446573137    | 100   | 140 | 0     | Open | ; |
| 30909               | 18774 |     | 19357 |      |   |
| 42.407938461165 100 |       | 140 | 0     | Open | ; |
| 30910               | 23352 |     | 24325 |      |   |
| 42.4218013761382    | 150   | 140 | 0     | Open | ; |
| 30911               | 23702 |     | 24201 |      |   |



|                     |       |     |       |      |   |
|---------------------|-------|-----|-------|------|---|
| 50.1414651346218    | 125   | 150 | 0     | Open | ; |
| 30912               | 24938 |     | 24078 |      |   |
| 42.7744883790818    | 75    | 140 | 0     | Open | ; |
| 30913               | 22646 |     | 22542 |      |   |
| 42.5425531389629    | 110   | 150 | 0     | Open | ; |
| 30914               | 24324 |     | 23584 |      |   |
| 42.5470977046281    | 100   | 140 | 0     | Open | ; |
| 30915               | 20556 |     | 20557 |      |   |
| 42.5571591469604    | 110   | 150 | 0     | Open | ; |
| 30916               | 20406 |     | 20407 |      |   |
| 42.557660526505 110 |       | 150 | 0     | Open | ; |
| 30917               | 24796 |     | 24807 |      |   |
| 42.5653450598218    | 110   | 150 | 0     | Open | ; |
| 30918               | 24798 |     | 24806 |      |   |
| 42.5654316014701    | 110   | 150 | 0     | Open | ; |
| 30919               | 24800 |     | 24805 |      |   |
| 42.5654316019501    | 110   | 150 | 0     | Open | ; |
| 30920               | 24802 |     | 24804 |      |   |
| 42.5654316014879    | 110   | 150 | 0     | Open | ; |
| 30921               | 19263 |     | 19232 |      |   |
| 49.353244438541 110 |       | 150 | 0     | Open | ; |
| 30922               | 21322 |     | 23109 |      |   |
| 42.6051564933905    | 100   | 140 | 0     | Open | ; |
| 30923               | 19796 |     | 19797 |      |   |
| 42.6203385086069    | 75    | 140 | 0     | Open | ; |
| 30924               | 24702 |     | 24700 |      |   |
| 42.6258063361359    | 110   | 150 | 0     | Open | ; |
| 30925               | 19048 |     | 19044 |      |   |
| 42.6259086076182    | 100   | 140 | 0     | Open | ; |
| 30926               | 21625 |     | 21942 |      |   |
| 42.6402872730796    | 160   | 150 | 0     | Open | ; |
| 30927               | 23708 |     | 23709 |      |   |
| 42.6425811212652    | 75    | 150 | 0     | Open | ; |
| 30928               | 18845 |     | 18846 |      |   |
| 42.6448685095983    | 75    | 140 | 0     | Open | ; |
| 30929               | 25028 |     | 22477 |      |   |
| 43.2808608949997    | 110   | 150 | 0     | Open | ; |
| 30930               | 18558 |     | 18559 |      |   |
| 42.7148505740452    | 200   | 150 | 0     | Open | ; |
| 30931               | 24658 |     | 24657 |      |   |
| 42.7401118603913    | 110   | 150 | 0     | Open | ; |
| 30932               | 22226 |     | 22217 |      |   |
| 42.7475823681424    | 250   | 150 | 0     | Open | ; |
| 30933               | 22881 |     | 22230 |      |   |
| 42.74900049038 140  |       | 150 | 0     | Open | ; |
| 30934               | 23919 |     | 22974 |      |   |
| 42.7480000008575    | 100   | 140 | 0     | Open | ; |
| 30935               | 21042 |     | 21752 |      |   |
| 42.7973886412623    | 110   | 150 | 0     | Open | ; |
| 30936               | 20570 |     | 20571 |      |   |

|                  |       |     |       |      |   |
|------------------|-------|-----|-------|------|---|
| 42.8183035031209 | 110   | 150 | 0     | Open | ; |
| 30937            | 23295 |     | 19800 |      |   |
| 42.8421778749441 | 110   | 150 | 0     | Open | ; |
| 30938            | 22362 |     | 21560 |      |   |
| 42.8540671821702 | 125   | 140 | 0     | Open | ; |
| 30939            | 22261 |     | 19684 |      |   |
| 42.8573716476863 | 110   | 150 | 0     | Open | ; |
| 30940            | 24030 |     | 25043 |      |   |
| 52.1064261687214 | 160   | 150 | 0     | Open | ; |
| 30941            | 22867 |     | 23023 |      |   |
| 42.9558682919663 | 110   | 150 | 0     | Open | ; |
| 30942            | 19959 |     | 19960 |      |   |
| 42.9933327328072 | 75    | 150 | 0     | Open | ; |
| 30943            | 18504 |     | 24956 |      |   |
| 58.9106354451489 | 75    | 150 | 0     | Open | ; |
| 30944            | 23112 |     | 22146 |      |   |
| 42.9949658645543 | 125   | 150 | 0     | Open | ; |
| 30945            | 21893 |     | 21894 |      |   |
| 42.9958676634282 | 100   | 140 | 0     | Open | ; |
| 30946            | 18500 |     | 21388 |      |   |
| 42.9972043173544 | 75    | 150 | 0     | Open | ; |
| 30947            | 20578 |     | 22869 |      |   |
| 42.9973840569472 | 110   | 150 | 0     | Open | ; |
| 30948            | 18993 |     | 20300 |      |   |
| 42.9973840569472 | 110   | 150 | 0     | Open | ; |
| 30949            | 22747 |     | 23100 |      |   |
| 42.9973915901671 | 75    | 140 | 0     | Open | ; |
| 30950            | 19019 |     | 22362 |      |   |
| 42.9973920757468 | 125   | 140 | 0     | Open | ; |
| 30951            | 20990 |     | 19786 |      |   |
| 42.9974125350993 | 100   | 140 | 0     | Open | ; |
| 30952            | 21575 |     | 19214 |      |   |
| 42.9974435888644 | 110   | 150 | 0     | Open | ; |
| 30953            | 18991 |     | 20621 |      |   |
| 42.9974818141491 | 110   | 150 | 0     | Open | ; |
| 30954            | 19242 |     | 19243 |      |   |
| 42.9975090333091 | 75    | 140 | 0     | Open | ; |
| 30955            | 25036 |     | 20316 |      |   |
| 43.0957870989889 | 160   | 150 | 0     | Open | ; |
| 30956            | 22388 |     | 19144 |      |   |
| 42.997527000487  | 110   | 150 | 0     | Open | ; |
| 30957            | 23150 |     | 21566 |      |   |
| 42.9975371257823 | 160   | 150 | 0     | Open | ; |
| 30958            | 19830 |     | 19831 |      |   |
| 42.9975586811939 | 200   | 150 | 0     | Open | ; |
| 30959            | 20601 |     | 20470 |      |   |
| 42.9975828238984 | 160   | 150 | 0     | Open | ; |
| 30960            | 19630 |     | 19623 |      |   |
| 42.9976252617577 | 200   | 150 | 0     | Open | ; |
| 30961            | 21967 |     | 22479 |      |   |

|                  |       |     |       |      |   |
|------------------|-------|-----|-------|------|---|
| 42.9976482686144 | 110   | 150 | 0     | Open | ; |
| 30962            | 19403 |     | 19300 |      |   |
| 42.9979599822041 | 160   | 150 | 0     | Open | ; |
| 30963            | 22955 |     | 20725 |      |   |
| 42.9980156350277 | 110   | 150 | 0     | Open | ; |
| 30964            | 24162 |     | 24173 |      |   |
| 42.9991907334482 | 75    | 140 | 0     | Open | ; |
| 30965            | 24340 |     | 19195 |      |   |
| 42.9998085616007 | 125   | 140 | 0     | Open | ; |
| 30966            | 24510 |     | 24511 |      |   |
| 42.9999317293129 | 75    | 150 | 0     | Open | ; |
| 30967            | 18502 |     | 21271 |      |   |
| 43.0024339500941 | 75    | 150 | 0     | Open | ; |
| 30968            | 23093 |     | 20847 |      |   |
| 43.0047926946774 | 100   | 140 | 0     | Open | ; |
| 30969            | 21896 |     | 19068 |      |   |
| 43.0052991893571 | 110   | 150 | 0     | Open | ; |
| 30970            | 20627 |     | 20699 |      |   |
| 43.0110434063923 | 200   | 150 | 0     | Open | ; |
| 30971            | 21457 |     | 21114 |      |   |
| 43.0147322652157 | 110   | 150 | 0     | Open | ; |
| 30972            | 20827 |     | 20826 |      |   |
| 43.0159980743782 | 100   | 140 | 0     | Open | ; |
| 30973            | 20195 |     | 20193 |      |   |
| 43.0258195117506 | 100   | 140 | 0     | Open | ; |
| 30974            | 23167 |     | 24456 |      |   |
| 43.0321507307705 | 110   | 150 | 0     | Open | ; |
| 30976            | 24592 |     | 24593 |      |   |
| 43.0679193518348 | 100   | 140 | 0     | Open | ; |
| 30977            | 22553 |     | 21275 |      |   |
| 43.0831158712266 | 75    | 140 | 0     | Open | ; |
| 30978            | 20644 |     | 23305 |      |   |
| 43.0995197330748 | 100   | 140 | 0     | Open | ; |
| 30979            | 22197 |     | 22200 |      |   |
| 43.1090686751128 | 140   | 150 | 0     | Open | ; |
| 30980            | 24085 |     | 24054 |      |   |
| 43.118870902916  | 100   | 140 | 0     | Open | ; |
| 30981            | 24877 |     | 24878 |      |   |
| 43.1535828581426 | 110   | 150 | 0     | Open | ; |
| 30982            | 22947 |     | 22948 |      |   |
| 43.1549821356574 | 90    | 150 | 0     | Open | ; |
| 30983            | 19106 |     | 19096 |      |   |
| 43.1751942343476 | 110   | 150 | 0     | Open | ; |
| 30984            | 19068 |     | 21899 |      |   |
| 43.1753119593419 | 110   | 150 | 0     | Open | ; |
| 30985            | 23262 |     | 21830 |      |   |
| 43.1803365147756 | 100   | 140 | 0     | Open | ; |
| 30986            | 21212 |     | 18579 |      |   |
| 43.1956410281299 | 125   | 150 | 0     | Open | ; |
| 30987            | 19757 |     | 19758 |      |   |

|                     |       |     |       |      |   |
|---------------------|-------|-----|-------|------|---|
| 43.214779618317 75  |       | 150 | 0     | Open | ; |
| 30988               | 22378 |     | 18558 |      |   |
| 43.215596369919 200 |       | 150 | 0     | Open | ; |
| 30989               | 19190 |     | 23219 |      |   |
| 51.9969991622852    | 200   | 150 | 0     | Open | ; |
| 30990               | 21051 |     | 21052 |      |   |
| 43.2321255096942    | 150   | 140 | 0     | Open | ; |
| 30991               | 21350 |     | 22097 |      |   |
| 43.2368576513699    | 125   | 150 | 0     | Open | ; |
| 30992               | 23309 |     | 23041 |      |   |
| 43.2405629290394    | 125   | 150 | 0     | Open | ; |
| 30993               | 20103 |     | 22275 |      |   |
| 43.243385130949 100 |       | 140 | 0     | Open | ; |
| 30994               | 20157 |     | 23117 |      |   |
| 43.2436374167245    | 110   | 150 | 0     | Open | ; |
| 30995               | 19108 |     | 20919 |      |   |
| 43.2690049095724    | 140   | 150 | 0     | Open | ; |
| 30996               | 20336 |     | 20337 |      |   |
| 43.2812863383539    | 110   | 150 | 0     | Open | ; |
| 30997               | 22107 |     | 22108 |      |   |
| 43.3104902151778    | 110   | 150 | 0     | Open | ; |
| 30998               | 20406 |     | 23646 |      |   |
| 43.323739536737 110 |       | 150 | 0     | Open | ; |
| 30999               | 22694 |     | 20123 |      |   |
| 43.3536111747037    | 75    | 140 | 0     | Open | ; |
| 31000               | 18702 |     | 18703 |      |   |
| 43.3611785853249    | 75    | 150 | 0     | Open | ; |
| 31001               | 20705 |     | 20706 |      |   |
| 43.3772544736629    | 200   | 150 | 0     | Open | ; |
| 31002               | 20555 |     | 20553 |      |   |
| 43.3922108310882    | 110   | 150 | 0     | Open | ; |
| 31003               | 20439 |     | 20587 |      |   |
| 43.4106532155218    | 125   | 140 | 0     | Open | ; |
| 31004               | 22533 |     | 24827 |      |   |
| 43.416559886581 110 |       | 150 | 0     | Open | ; |
| 31005               | 23674 |     | 22763 |      |   |
| 43.4314981358409    | 110   | 150 | 0     | Open | ; |
| 31006               | 19749 |     | 21622 |      |   |
| 43.4322927102067    | 100   | 140 | 0     | Open | ; |
| 31007               | 24860 |     | 24937 |      |   |
| 43.4421963931831    | 160   | 150 | 0     | Open | ; |
| 31008               | 22855 |     | 23493 |      |   |
| 43.4687606629803    | 75    | 140 | 0     | Open | ; |
| 31009               | 23483 |     | 22917 |      |   |
| 43.4758803612104    | 100   | 140 | 0     | Open | ; |
| 31010               | 21002 |     | 21003 |      |   |
| 43.4997728738208    | 200   | 150 | 0     | Open | ; |
| 31011               | 21232 |     | 21233 |      |   |
| 43.5042165374861    | 100   | 140 | 0     | Open | ; |
| 31012               | 18875 |     | 18876 |      |   |

|                     |       |     |       |      |   |
|---------------------|-------|-----|-------|------|---|
| 43.5273742095257    | 100   | 140 | 0     | Open | ; |
| 31013               | 24832 |     | 24830 |      |   |
| 43.5263851428385    | 110   | 150 | 0     | Open | ; |
| 31014               | 22949 |     | 22950 |      |   |
| 43.5499864003385    | 90    | 150 | 0     | Open | ; |
| 31015               | 22670 |     | 21730 |      |   |
| 43.5662264829768    | 75    | 140 | 0     | Open | ; |
| 31016               | 21776 |     | 21777 |      |   |
| 43.5681731434099    | 90    | 150 | 0     | Open | ; |
| 31017               | 24697 |     | 24698 |      |   |
| 43.5688644553518    | 75    | 150 | 0     | Open | ; |
| 31018               | 24551 |     | 24553 |      |   |
| 43.6106361821689    | 200   | 150 | 0     | Open | ; |
| 31019               | 19417 |     | 24023 |      |   |
| 47.811015947857 160 |       | 150 | 0     | Open | ; |
| 31020               | 19104 |     | 23595 |      |   |
| 43.6364884530419    | 75    | 150 | 0     | Open | ; |
| 31021               | 20571 |     | 20044 |      |   |
| 43.6609018834751    | 110   | 150 | 0     | Open | ; |
| 31022               | 19750 |     | 23031 |      |   |
| 43.6880703465031    | 100   | 140 | 0     | Open | ; |
| 31023               | 22973 |     | 18897 |      |   |
| 43.7202764621576    | 110   | 150 | 0     | Open | ; |
| 31024               | 19107 |     | 19108 |      |   |
| 43.7214572057105    | 140   | 150 | 0     | Open | ; |
| 31025               | 22160 |     | 22188 |      |   |
| 43.7251800560873    | 100   | 140 | 0     | Open | ; |
| 31026               | 21673 |     | 21678 |      |   |
| 43.7383354313082    | 110   | 150 | 0     | Open | ; |
| 31027               | 20938 |     | 20751 |      |   |
| 43.8596751300191    | 110   | 150 | 0     | Open | ; |
| 31028               | 24988 |     | 19689 |      |   |
| 44.4605979374369    | 75    | 140 | 0     | Open | ; |
| 31029               | 22347 |     | 22348 |      |   |
| 43.7885747903469    | 110   | 150 | 0     | Open | ; |
| 31030               | 21276 |     | 21272 |      |   |
| 54.0773235964864    | 75    | 140 | 0     | Open | ; |
| 31031               | 18873 |     | 18874 |      |   |
| 43.8100544152433    | 125   | 140 | 0     | Open | ; |
| 31032               | 24242 |     | 22089 |      |   |
| 51.6140999213041    | 200   | 150 | 0     | Open | ; |
| 31033               | 20919 |     | 20921 |      |   |
| 43.8570150560493    | 140   | 150 | 0     | Open | ; |
| 31034               | 20706 |     | 22329 |      |   |
| 43.8859512814027    | 200   | 150 | 0     | Open | ; |
| 31035               | 24487 |     | 24490 |      |   |
| 51.6724397620169    | 110   | 150 | 0     | Open | ; |
| 31036               | 23407 |     | 23477 |      |   |
| 43.9120903877334    | 160   | 150 | 0     | Open | ; |
| 31037               | 24432 |     | 24434 |      |   |

|                     |       |     |       |      |   |
|---------------------|-------|-----|-------|------|---|
| 43.926842214069 110 |       | 150 | 0     | Open | ; |
| 31038               | 21417 |     | 19859 |      |   |
| 43.9282529472254    | 100   | 140 | 0     | Open | ; |
| 31039               | 19138 |     | 23879 |      |   |
| 43.9478340153895    | 75    | 140 | 0     | Open | ; |
| 31040               | 23964 |     | 23965 |      |   |
| 43.9828564164836    | 75    | 140 | 0     | Open | ; |
| 31041               | 20885 |     | 20121 |      |   |
| 43.9936250374368    | 200   | 150 | 0     | Open | ; |
| 31042               | 22899 |     | 21869 |      |   |
| 46.3721944942254    | 125   | 140 | 0     | Open | ; |
| 31043               | 23567 |     | 24748 |      |   |
| 43.9940292674607    | 160   | 150 | 0     | Open | ; |
| 31044               | 23024 |     | 23025 |      |   |
| 43.9941252143614    | 100   | 100 | 0     | Open | ; |
| 31045               | 21614 |     | 20636 |      |   |
| 43.9961076317305    | 150   | 140 | 0     | Open | ; |
| 31046               | 21452 |     | 21448 |      |   |
| 43.9973655653824    | 100   | 140 | 0     | Open | ; |
| 31047               | 20738 |     | 20540 |      |   |
| 43.997422227304 110 |       | 150 | 0     | Open | ; |
| 31048               | 21671 |     | 19822 |      |   |
| 43.9975044627804    | 110   | 150 | 0     | Open | ; |
| 31049               | 21170 |     | 21726 |      |   |
| 43.9975748009087    | 160   | 150 | 0     | Open | ; |
| 31050               | 20063 |     | 22700 |      |   |
| 43.9978250123482    | 75    | 140 | 0     | Open | ; |
| 31051               | 22145 |     | 23663 |      |   |
| 43.9979897813823    | 110   | 150 | 0     | Open | ; |
| 31052               | 21397 |     | 21398 |      |   |
| 43.9980909957478    | 100   | 140 | 0     | Open | ; |
| 31053               | 23695 |     | 23051 |      |   |
| 43.9985103217652    | 110   | 150 | 0     | Open | ; |
| 31054               | 19717 |     | 22415 |      |   |
| 43.9991314620017    | 200   | 150 | 0     | Open | ; |
| 31055               | 22815 |     | 24031 |      |   |
| 43.9993901076347    | 75    | 150 | 0     | Open | ; |
| 31056               | 24842 |     | 24844 |      |   |
| 44.0000023650267    | 75    | 150 | 0     | Open | ; |
| 31057               | 23028 |     | 19892 |      |   |
| 44.0117060109104    | 200   | 150 | 0     | Open | ; |
| 31058               | 20723 |     | 20770 |      |   |
| 45.0836611107275    | 110   | 150 | 0     | Open | ; |
| 31059               | 23620 |     | 23621 |      |   |
| 44.0280315953308    | 110   | 150 | 0     | Open | ; |
| 31060               | 20305 |     | 22875 |      |   |
| 44.035795131702 100 |       | 140 | 0     | Open | ; |
| 31061               | 24518 |     | 24521 |      |   |
| 44.0332224642121    | 110   | 150 | 0     | Open | ; |
| 31062               | 22846 |     | 20350 |      |   |

|                  |       |     |       |      |   |
|------------------|-------|-----|-------|------|---|
| 44.2571747300292 | 140   | 150 | 0     | Open | ; |
| 31063            | 21630 |     | 21895 |      |   |
| 44.0782241190615 | 75    | 150 | 0     | Open | ; |
| 31064            | 22981 |     | 19628 |      |   |
| 45.9921143611492 | 200   | 150 | 0     | Open | ; |
| 31065            | 20809 |     | 22264 |      |   |
| 44.1194215854028 | 75    | 150 | 0     | Open | ; |
| 31066            | 19475 |     | 19476 |      |   |
| 44.1246362419517 | 75    | 140 | 0     | Open | ; |
| 31067            | 20730 |     | 23398 |      |   |
| 44.1275952157522 | 75    | 150 | 0     | Open | ; |
| 31068            | 20847 |     | 20848 |      |   |
| 44.1483172948506 | 100   | 140 | 0     | Open | ; |
| 31069            | 20417 |     | 20562 |      |   |
| 44.1625043477741 | 110   | 150 | 0     | Open | ; |
| 31070            | 24762 |     | 24763 |      |   |
| 44.1652697487751 | 110   | 150 | 0     | Open | ; |
| 31071            | 18668 |     | 18669 |      |   |
| 44.2088073996342 | 110   | 150 | 0     | Open | ; |
| 31072            | 19774 |     | 21739 |      |   |
| 44.2100743835184 | 160   | 150 | 0     | Open | ; |
| 31073            | 21111 |     | 20546 |      |   |
| 44.2806827761489 | 160   | 150 | 0     | Open | ; |
| 31074            | 19070 |     | 20423 |      |   |
| 44.3028560229536 | 110   | 150 | 0     | Open | ; |
| 31075            | 19650 |     | 20042 |      |   |
| 44.3053337331656 | 110   | 150 | 0     | Open | ; |
| 31076            | 20699 |     | 20701 |      |   |
| 44.3138194559969 | 200   | 150 | 0     | Open | ; |
| 31077            | 20755 |     | 20734 |      |   |
| 44.3156213078864 | 200   | 150 | 0     | Open | ; |
| 31078            | 21004 |     | 21005 |      |   |
| 44.3280028695144 | 75    | 150 | 0     | Open | ; |
| 31079            | 23635 |     | 23837 |      |   |
| 44.3303184773116 | 125   | 150 | 0     | Open | ; |
| 31080            | 21321 |     | 21322 |      |   |
| 44.3351794221327 | 100   | 140 | 0     | Open | ; |
| 31081            | 24635 |     | 24661 |      |   |
| 44.3377032914405 | 100   | 140 | 0     | Open | ; |
| 31082            | 20153 |     | 20062 |      |   |
| 44.3457460653576 | 75    | 140 | 0     | Open | ; |
| 31083            | 22384 |     | 25013 |      |   |
| 57.4733443171442 | 100   | 140 | 0     | Open | ; |
| 31084            | 21741 |     | 23295 |      |   |
| 44.3784584523245 | 110   | 150 | 0     | Open | ; |
| 31085            | 24985 |     | 23881 |      |   |
| 44.9439249706835 | 160   | 150 | 0     | Open | ; |
| 31086            | 22275 |     | 19749 |      |   |
| 44.3812287517964 | 100   | 140 | 0     | Open | ; |
| 31087            | 21983 |     | 18586 |      |   |

|                  |       |     |       |      |   |
|------------------|-------|-----|-------|------|---|
| 44.41304898345   | 160   | 150 | 0     | Open | ; |
| 31088            | 19117 |     | 22795 |      |   |
| 44.4153076981708 | 125   | 150 | 0     | Open | ; |
| 31089            | 21290 |     | 21291 |      |   |
| 44.4199001003958 | 100   | 140 | 0     | Open | ; |
| 31090            | 22655 |     | 20207 |      |   |
| 47.296128500392  | 110   | 150 | 0     | Open | ; |
| 31091            | 22127 |     | 19972 |      |   |
| 44.4528798644707 | 150   | 140 | 0     | Open | ; |
| 31092            | 20044 |     | 22806 |      |   |
| 44.5135946598943 | 110   | 150 | 0     | Open | ; |
| 31093            | 19493 |     | 21416 |      |   |
| 44.4992822233718 | 100   | 140 | 0     | Open | ; |
| 31094            | 24766 |     | 24767 |      |   |
| 44.6056097580919 | 110   | 150 | 0     | Open | ; |
| 31095            | 21949 |     | 21950 |      |   |
| 44.6273046261421 | 100   | 140 | 0     | Open | ; |
| 31096            | 22679 |     | 22577 |      |   |
| 51.7283390618755 | 160   | 150 | 0     | Open | ; |
| 31097            | 20337 |     | 22646 |      |   |
| 44.6392781296968 | 110   | 150 | 0     | Open | ; |
| 31098            | 19536 |     | 19537 |      |   |
| 44.6491787924749 | 125   | 140 | 0     | Open | ; |
| 31099            | 18906 |     | 19952 |      |   |
| 44.66736274782   | 100   | 140 | 0     | Open | ; |
| 31100            | 20185 |     | 20183 |      |   |
| 44.6947567416083 | 110   | 150 | 0     | Open | ; |
| 31101            | 23426 |     | 23427 |      |   |
| 44.727894965072  | 75    | 150 | 0     | Open | ; |
| 31102            | 18689 |     | 21164 |      |   |
| 44.788554796425  | 150   | 140 | 0     | Open | ; |
| 31103            | 22404 |     | 22842 |      |   |
| 44.7973871044272 | 100   | 140 | 0     | Open | ; |
| 31104            | 24062 |     | 24955 |      |   |
| 45.6006322128392 | 110   | 150 | 0     | Open | ; |
| 31105            | 20412 |     | 20533 |      |   |
| 44.843483479568  | 110   | 150 | 0     | Open | ; |
| 31106            | 25049 |     | 25050 |      |   |
| 44.8735412991669 | 200   | 140 | 0     | Open | ; |
| 31107            | 23989 |     | 23990 |      |   |
| 44.8841319362825 | 110   | 150 | 0     | Open | ; |
| 31108            | 23951 |     | 20374 |      |   |
| 46.9416983164832 | 140   | 150 | 0     | Open | ; |
| 31109            | 24767 |     | 24757 |      |   |
| 44.9031297356433 | 160   | 150 | 0     | Open | ; |
| 31110            | 23939 |     | 25144 |      |   |
| 44.91041457854   | 100   | 140 | 0     | Open | ; |
| 31111            | 21275 |     | 21273 |      |   |
| 44.9120027737784 | 75    | 140 | 0     | Open | ; |
| 31112            | 21365 |     | 21697 |      |   |



|                  |       |     |       |      |   |
|------------------|-------|-----|-------|------|---|
| 44.9307941925115 | 110   | 150 | 0     | Open | ; |
| 31113            | 18519 |     | 18520 |      |   |
| 44.9334268495447 | 75    | 150 | 0     | Open | ; |
| 31114            | 20374 |     | 20370 |      |   |
| 44.9555214595519 | 140   | 150 | 0     | Open | ; |
| 31115            | 21327 |     | 21027 |      |   |
| 44.9709179474462 | 125   | 140 | 0     | Open | ; |
| 31116            | 20229 |     | 20198 |      |   |
| 44.9722387487111 | 75    | 150 | 0     | Open | ; |
| 31117            | 21695 |     | 18690 |      |   |
| 44.9931187773082 | 140   | 150 | 0     | Open | ; |
| 31118            | 23662 |     | 20052 |      |   |
| 44.9948052897025 | 140   | 150 | 0     | Open | ; |
| 31119            | 19772 |     | 19773 |      |   |
| 44.9960696956331 | 75    | 140 | 0     | Open | ; |
| 31120            | 23587 |     | 23736 |      |   |
| 44.9969444722313 | 75    | 140 | 0     | Open | ; |
| 31121            | 20635 |     | 23805 |      |   |
| 44.9969723001453 | 75    | 140 | 0     | Open | ; |
| 31122            | 20102 |     | 20103 |      |   |
| 44.9971131174725 | 100   | 140 | 0     | Open | ; |
| 31123            | 18943 |     | 18944 |      |   |
| 44.9973581118793 | 75    | 140 | 0     | Open | ; |
| 31124            | 18981 |     | 23547 |      |   |
| 44.9973785720112 | 75    | 150 | 0     | Open | ; |
| 31125            | 23062 |     | 23063 |      |   |
| 44.9973794630236 | 75    | 150 | 0     | Open | ; |
| 31126            | 18890 |     | 18891 |      |   |
| 44.9973818649407 | 100   | 140 | 0     | Open | ; |
| 31127            | 20772 |     | 22893 |      |   |
| 44.9974701774475 | 75    | 140 | 0     | Open | ; |
| 31128            | 19786 |     | 19787 |      |   |
| 44.997482265596  | 100   | 140 | 0     | Open | ; |
| 31129            | 18501 |     | 21465 |      |   |
| 44.9975848265729 | 110   | 150 | 0     | Open | ; |
| 31130            | 19525 |     | 19526 |      |   |
| 45.0185125476786 | 75    | 140 | 0     | Open | ; |
| 31131            | 23710 |     | 23711 |      |   |
| 45.0262969247027 | 75    | 150 | 0     | Open | ; |
| 31132            | 19855 |     | 19856 |      |   |
| 45.0443173983604 | 160   | 150 | 0     | Open | ; |
| 31133            | 20611 |     | 23912 |      |   |
| 46.9974449071022 | 125   | 140 | 0     | Open | ; |
| 31134            | 18737 |     | 19705 |      |   |
| 54.9931160163125 | 125   | 150 | 0     | Open | ; |
| 31135            | 21851 |     | 21852 |      |   |
| 45.0854837180435 | 140   | 150 | 0     | Open | ; |
| 31136            | 23012 |     | 23011 |      |   |
| 45.086615184312  | 160   | 150 | 0     | Open | ; |
| 31137            | 24811 |     | 20932 |      |   |

|                     |       |     |       |      |   |
|---------------------|-------|-----|-------|------|---|
| 45.0982246992379    | 250   | 150 | 0     | Open | ; |
| 31138               | 24869 |     | 24891 |      |   |
| 47.699390394298 110 |       | 150 | 0     | Open | ; |
| 31139               | 21256 |     | 21258 |      |   |
| 45.1329913340081    | 110   | 150 | 0     | Open | ; |
| 31140               | 19618 |     | 22640 |      |   |
| 45.180814050128 110 |       | 150 | 0     | Open | ; |
| 31141               | 20751 |     | 20622 |      |   |
| 45.2096373912938    | 110   | 150 | 0     | Open | ; |
| 31142               | 23641 |     | 23642 |      |   |
| 45.2357806049351    | 100   | 140 | 0     | Open | ; |
| 31143               | 19953 |     | 18905 |      |   |
| 45.2620257986202    | 100   | 140 | 0     | Open | ; |
| 31144               | 19080 |     | 24257 |      |   |
| 45.2812330409964    | 75    | 140 | 0     | Open | ; |
| 31145               | 24888 |     | 24884 |      |   |
| 45.2846475894272    | 110   | 150 | 0     | Open | ; |
| 31146               | 19080 |     | 19525 |      |   |
| 59.0178175433189    | 75    | 140 | 0     | Open | ; |
| 31147               | 22677 |     | 23863 |      |   |
| 45.32720398652 75   |       | 140 | 0     | Open | ; |
| 31148               | 19832 |     | 19833 |      |   |
| 45.331969693192 75  |       | 140 | 0     | Open | ; |
| 31149               | 24461 |     | 20599 |      |   |
| 45.3511969151372    | 100   | 140 | 0     | Open | ; |
| 31150               | 21066 |     | 22974 |      |   |
| 45.3541537162341    | 100   | 140 | 0     | Open | ; |
| 31151               | 19379 |     | 19380 |      |   |
| 45.3549683368329    | 100   | 140 | 0     | Open | ; |
| 31152               | 22686 |     | 22801 |      |   |
| 45.3829770987764    | 75    | 140 | 0     | Open | ; |
| 31153               | 20160 |     | 21855 |      |   |
| 45.398397100423 125 |       | 140 | 0     | Open | ; |
| 31154               | 20275 |     | 21722 |      |   |
| 45.4099820092656    | 100   | 130 | 0     | Open | ; |
| 31155               | 20378 |     | 20376 |      |   |
| 45.4186568465108    | 200   | 150 | 0     | Open | ; |
| 31156               | 20177 |     | 20178 |      |   |
| 45.4224605021159    | 160   | 150 | 0     | Open | ; |
| 31157               | 22746 |     | 22854 |      |   |
| 45.4459964645473    | 100   | 140 | 0     | Open | ; |
| 31158               | 19482 |     | 18971 |      |   |
| 45.4482203010561    | 75    | 140 | 0     | Open | ; |
| 31159               | 22516 |     | 21729 |      |   |
| 45.4485591554668    | 75    | 140 | 0     | Open | ; |
| 31160               | 20927 |     | 22926 |      |   |
| 45.4584253869948    | 75    | 140 | 0     | Open | ; |
| 31161               | 20423 |     | 22785 |      |   |
| 45.4669288134835    | 110   | 150 | 0     | Open | ; |
| 31162               | 21039 |     | 21028 |      |   |

|                  |       |     |       |      |   |
|------------------|-------|-----|-------|------|---|
| 45.4980113894154 | 100   | 140 | 0     | Open | ; |
| 31163            | 22131 |     | 21325 |      |   |
| 45.5314931504638 | 100   | 140 | 0     | Open | ; |
| 31164            | 19805 |     | 22489 |      |   |
| 47.1395913513119 | 110   | 150 | 0     | Open | ; |
| 31165            | 21506 |     | 24398 |      |   |
| 45.5385197515029 | 110   | 150 | 0     | Open | ; |
| 31166            | 21730 |     | 21732 |      |   |
| 45.5576660505315 | 75    | 140 | 0     | Open | ; |
| 31167            | 23199 |     | 21631 |      |   |
| 45.5973993687456 | 125   | 150 | 0     | Open | ; |
| 31168            | 24758 |     | 24759 |      |   |
| 45.6130247193152 | 110   | 150 | 0     | Open | ; |
| 31169            | 19181 |     | 19182 |      |   |
| 45.6573074719386 | 100   | 140 | 0     | Open | ; |
| 31170            | 22047 |     | 22048 |      |   |
| 45.6692392045363 | 75    | 140 | 0     | Open | ; |
| 31171            | 20426 |     | 21896 |      |   |
| 45.6817341193661 | 110   | 150 | 0     | Open | ; |
| 31172            | 23270 |     | 19463 |      |   |
| 45.6862908734821 | 110   | 150 | 0     | Open | ; |
| 31173            | 20376 |     | 20372 |      |   |
| 45.6864188804698 | 200   | 150 | 0     | Open | ; |
| 31174            | 22304 |     | 19678 |      |   |
| 45.6946030111853 | 100   | 140 | 0     | Open | ; |
| 31175            | 18976 |     | 19483 |      |   |
| 45.7392119177628 | 75    | 140 | 0     | Open | ; |
| 31176            | 20045 |     | 21599 |      |   |
| 45.7526780501391 | 160   | 150 | 0     | Open | ; |
| 31177            | 21791 |     | 21792 |      |   |
| 45.8064009832863 | 110   | 150 | 0     | Open | ; |
| 31178            | 23677 |     | 23678 |      |   |
| 45.8231808896742 | 75    | 150 | 0     | Open | ; |
| 31179            | 23365 |     | 23367 |      |   |
| 45.8631081993011 | 110   | 150 | 0     | Open | ; |
| 31180            | 19448 |     | 23241 |      |   |
| 45.9036113300217 | 110   | 150 | 0     | Open | ; |
| 31181            | 22461 |     | 23760 |      |   |
| 45.9162145626159 | 100   | 140 | 0     | Open | ; |
| 31182            | 19125 |     | 20152 |      |   |
| 45.9249355225792 | 75    | 140 | 0     | Open | ; |
| 31183            | 21070 |     | 20250 |      |   |
| 45.9473784929357 | 160   | 150 | 0     | Open | ; |
| 31184            | 19051 |     | 21363 |      |   |
| 45.9459125584648 | 75    | 140 | 0     | Open | ; |
| 31185            | 19670 |     | 19029 |      |   |
| 45.9496909267279 | 200   | 150 | 0     | Open | ; |
| 31186            | 24459 |     | 23180 |      |   |
| 45.978978687847  | 110   | 150 | 0     | Open | ; |
| 31187            | 20042 |     | 20573 |      |   |

|                    |       |     |       |      |   |
|--------------------|-------|-----|-------|------|---|
| 45.9794092704552   | 110   | 150 | 0     | Open | ; |
| 31188              | 21977 |     | 19790 |      |   |
| 45.9890241411449   | 150   | 140 | 0     | Open | ; |
| 31189              | 20209 |     | 20210 |      |   |
| 45.9945609225333   | 75    | 140 | 0     | Open | ; |
| 31190              | 21453 |     | 18489 |      |   |
| 45.9965247773003   | 75    | 140 | 0     | Open | ; |
| 31191              | 20882 |     | 22243 |      |   |
| 45.9967379059936   | 110   | 150 | 0     | Open | ; |
| 31192              | 20993 |     | 20994 |      |   |
| 45.9969275511693   | 100   | 140 | 0     | Open | ; |
| 31193              | 20905 |     | 20906 |      |   |
| 45.9972110599459   | 110   | 150 | 0     | Open | ; |
| 31194              | 23337 |     | 23338 |      |   |
| 45.9972417765 75   |       | 140 | 0     | Open | ; |
| 31195              | 19401 |     | 19402 |      |   |
| 45.9972622560129   | 160   | 150 | 0     | Open | ; |
| 31196              | 19903 |     | 23643 |      |   |
| 45.997276272535 75 |       | 150 | 0     | Open | ; |
| 31197              | 21401 |     | 21402 |      |   |
| 45.9972762730566   | 75    | 150 | 0     | Open | ; |
| 31198              | 20055 |     | 23581 |      |   |
| 45.9972824229035   | 75    | 150 | 0     | Open | ; |
| 31199              | 22001 |     | 20022 |      |   |
| 45.9972830128483   | 75    | 150 | 0     | Open | ; |
| 31200              | 21746 |     | 21745 |      |   |
| 45.9972909367659   | 110   | 150 | 0     | Open | ; |
| 31201              | 19955 |     | 19956 |      |   |
| 45.9973080939515   | 75    | 150 | 0     | Open | ; |
| 31202              | 21185 |     | 21186 |      |   |
| 45.9973193508244   | 75    | 150 | 0     | Open | ; |
| 31203              | 19887 |     | 22055 |      |   |
| 45.9973401339973   | 75    | 150 | 0     | Open | ; |
| 31204              | 21707 |     | 24641 |      |   |
| 45.9973566600622   | 160   | 150 | 0     | Open | ; |
| 31205              | 19547 |     | 23097 |      |   |
| 45.9973636295345   | 75    | 150 | 0     | Open | ; |
| 31206              | 18473 |     | 18474 |      |   |
| 45.9973673942092   | 125   | 150 | 0     | Open | ; |
| 31207              | 19416 |     | 19417 |      |   |
| 45.9973758344409   | 160   | 150 | 0     | Open | ; |
| 31208              | 23442 |     | 22996 |      |   |
| 45.9973769024012   | 75    | 140 | 0     | Open | ; |
| 31209              | 24641 |     | 24647 |      |   |
| 45.9974306069203   | 160   | 150 | 0     | Open | ; |
| 31210              | 20450 |     | 20451 |      |   |
| 45.9975627604539   | 160   | 150 | 0     | Open | ; |
| 31211              | 20448 |     | 20450 |      |   |
| 45.9977958541531   | 160   | 150 | 0     | Open | ; |
| 31212              | 22402 |     | 22403 |      |   |

|                  |       |     |       |  |      |   |
|------------------|-------|-----|-------|--|------|---|
| 45.9978321086306 | 125   | 140 | 0     |  | Open | ; |
| 31213            | 19191 |     | 19811 |  |      |   |
| 45.998094243021  | 75    | 140 | 0     |  | Open | ; |
| 31214            | 23692 |     | 23693 |  |      |   |
| 45.9986625859779 | 75    | 150 | 0     |  | Open | ; |
| 31215            | 24636 |     | 24637 |  |      |   |
| 46.0001454467682 | 75    | 150 | 0     |  | Open | ; |
| 31216            | 19433 |     | 19434 |  |      |   |
| 46.0012901650124 | 75    | 150 | 0     |  | Open | ; |
| 31217            | 21805 |     | 21806 |  |      |   |
| 46.0035065215875 | 75    | 150 | 0     |  | Open | ; |
| 31218            | 23382 |     | 23383 |  |      |   |
| 46.0097965250108 | 110   | 150 | 0     |  | Open | ; |
| 31219            | 22007 |     | 20086 |  |      |   |
| 46.014522400407  | 75    | 150 | 0     |  | Open | ; |
| 31220            | 24570 |     | 24571 |  |      |   |
| 46.0286222323877 | 75    | 150 | 0     |  | Open | ; |
| 31221            | 24692 |     | 23168 |  |      |   |
| 46.0652009376936 | 160   | 150 | 0     |  | Open | ; |
| 31222            | 23101 |     | 21417 |  |      |   |
| 46.0727447115418 | 100   | 140 | 0     |  | Open | ; |
| 31223            | 23689 |     | 23690 |  |      |   |
| 46.1220743991785 | 75    | 150 | 0     |  | Open | ; |
| 31224            | 22210 |     | 22885 |  |      |   |
| 46.1263747972027 | 110   | 150 | 0     |  | Open | ; |
| 31225            | 19463 |     | 19448 |  |      |   |
| 46.1377193233862 | 110   | 150 | 0     |  | Open | ; |
| 31226            | 21882 |     | 20081 |  |      |   |
| 46.1388201133016 | 110   | 150 | 0     |  | Open | ; |
| 31227            | 20661 |     | 20662 |  |      |   |
| 46.1767788543828 | 150   | 140 | 0     |  | Open | ; |
| 31228            | 24475 |     | 24476 |  |      |   |
| 46.1700738112772 | 110   | 150 | 0     |  | Open | ; |
| 31229            | 20884 |     | 20881 |  |      |   |
| 46.2202941432264 | 110   | 150 | 0     |  | Open | ; |
| 31230            | 21849 |     | 21850 |  |      |   |
| 46.2680249052969 | 110   | 150 | 0     |  | Open | ; |
| 31231            | 24780 |     | 24781 |  |      |   |
| 46.2706415171856 | 160   | 150 | 0     |  | Open | ; |
| 31232            | 22973 |     | 19938 |  |      |   |
| 46.2901647213163 | 110   | 150 | 0     |  | Open | ; |
| 31233            | 23616 |     | 19763 |  |      |   |
| 46.4973750541178 | 200   | 150 | 0     |  | Open | ; |
| 31234            | 23666 |     | 23667 |  |      |   |
| 46.3205321908164 | 75    | 150 | 0     |  | Open | ; |
| 31235            | 21585 |     | 21586 |  |      |   |
| 46.3352502345635 | 75    | 150 | 0     |  | Open | ; |
| 31236            | 21587 |     | 21588 |  |      |   |
| 46.3886702063363 | 110   | 150 | 0     |  | Open | ; |
| 31237            | 20394 |     | 19620 |  |      |   |

|                     |       |     |       |      |   |
|---------------------|-------|-----|-------|------|---|
| 46.3897419465608    | 200   | 150 | 0     | Open | ; |
| 31238               | 20703 |     | 22890 |      |   |
| 46.4041351445118    | 75    | 150 | 0     | Open | ; |
| 31239               | 21889 |     | 24132 |      |   |
| 46.411082135724 110 |       | 150 | 0     | Open | ; |
| 31240               | 19888 |     | 24327 |      |   |
| 46.4591651405146    | 200   | 150 | 0     | Open | ; |
| 31241               | 20864 |     | 20785 |      |   |
| 46.4847933688932    | 125   | 150 | 0     | Open | ; |
| 31242               | 21007 |     | 23385 |      |   |
| 46.4973226955385    | 100   | 140 | 0     | Open | ; |
| 31243               | 20746 |     | 20882 |      |   |
| 46.4973954069925    | 110   | 150 | 0     | Open | ; |
| 31244               | 20451 |     | 20452 |      |   |
| 46.4974954267741    | 160   | 150 | 0     | Open | ; |
| 31245               | 20520 |     | 20522 |      |   |
| 46.4975393607036    | 110   | 150 | 0     | Open | ; |
| 31246               | 20554 |     | 25039 |      |   |
| 60.2523775874297    | 110   | 150 | 0     | Open | ; |
| 31247               | 23011 |     | 21650 |      |   |
| 46.5075226587305    | 160   | 150 | 0     | Open | ; |
| 31248               | 21214 |     | 24345 |      |   |
| 64.2003476254306    | 125   | 150 | 0     | Open | ; |
| 31249               | 20758 |     | 21284 |      |   |
| 46.6397635056052    | 450   | 140 | 0     | Open | ; |
| 31250               | 21360 |     | 21361 |      |   |
| 46.5498664519397    | 75    | 140 | 0     | Open | ; |
| 31251               | 18997 |     | 22402 |      |   |
| 46.6059427451377    | 125   | 140 | 0     | Open | ; |
| 31252               | 22694 |     | 24312 |      |   |
| 46.6412353096069    | 75    | 140 | 0     | Open | ; |
| 31253               | 23523 |     | 22564 |      |   |
| 46.644217692754 100 |       | 140 | 0     | Open | ; |
| 31254               | 20747 |     | 20884 |      |   |
| 46.6771123327901    | 110   | 150 | 0     | Open | ; |
| 31255               | 21920 |     | 23079 |      |   |
| 46.7124725017519    | 75    | 150 | 0     | Open | ; |
| 31256               | 23702 |     | 24059 |      |   |
| 53.4750359496266    | 125   | 150 | 0     | Open | ; |
| 31257               | 22471 |     | 22160 |      |   |
| 46.7559033881997    | 100   | 140 | 0     | Open | ; |
| 31258               | 22858 |     | 21060 |      |   |
| 54.7456215800631    | 75    | 140 | 0     | Open | ; |
| 31259               | 23423 |     | 23424 |      |   |
| 46.7725229035833    | 110   | 150 | 0     | Open | ; |
| 31260               | 24762 |     | 24764 |      |   |
| 46.7836392882588    | 110   | 150 | 0     | Open | ; |
| 31261               | 24504 |     | 24773 |      |   |
| 46.7881927924433    | 110   | 150 | 0     | Open | ; |
| 31262               | 19695 |     | 19693 |      |   |

|                  |       |     |       |      |   |
|------------------|-------|-----|-------|------|---|
| 46.7998769986494 | 100   | 140 | 0     | Open | ; |
| 31263            | 22885 |     | 22886 |      |   |
| 46.8196167765919 | 110   | 150 | 0     | Open | ; |
| 31264            | 23558 |     | 25072 |      |   |
| 51.9970733149286 | 100   | 140 | 0     | Open | ; |
| 31265            | 22961 |     | 22962 |      |   |
| 46.8507617856903 | 90    | 150 | 0     | Open | ; |
| 31266            | 21603 |     | 21604 |      |   |
| 46.8795102052973 | 110   | 150 | 0     | Open | ; |
| 31267            | 22769 |     | 19201 |      |   |
| 46.8931048578736 | 75    | 150 | 0     | Open | ; |
| 31268            | 22619 |     | 20074 |      |   |
| 46.9129626186116 | 110   | 150 | 0     | Open | ; |
| 31269            | 19015 |     | 21937 |      |   |
| 46.9970388254974 | 75    | 150 | 0     | Open | ; |
| 31270            | 19079 |     | 19080 |      |   |
| 46.9940771011175 | 75    | 140 | 0     | Open | ; |
| 31271            | 21622 |     | 20538 |      |   |
| 46.9968891167133 | 100   | 140 | 0     | Open | ; |
| 31272            | 19195 |     | 19196 |      |   |
| 46.9972254602119 | 125   | 140 | 0     | Open | ; |
| 31273            | 20522 |     | 20524 |      |   |
| 46.9972678803209 | 110   | 150 | 0     | Open | ; |
| 31274            | 21886 |     | 21887 |      |   |
| 46.9973049798243 | 110   | 150 | 0     | Open | ; |
| 31275            | 20870 |     | 20871 |      |   |
| 46.99730909208   | 75    | 150 | 0     | Open | ; |
| 31276            | 21496 |     | 21459 |      |   |
| 46.9973173567509 | 110   | 150 | 0     | Open | ; |
| 31277            | 21341 |     | 21342 |      |   |
| 46.9973604105462 | 110   | 150 | 0     | Open | ; |
| 31278            | 20634 |     | 20831 |      |   |
| 46.9975902793696 | 100   | 140 | 0     | Open | ; |
| 31279            | 18636 |     | 22579 |      |   |
| 46.9974342594672 | 125   | 150 | 0     | Open | ; |
| 31280            | 23373 |     | 23836 |      |   |
| 46.9975213203446 | 110   | 150 | 0     | Open | ; |
| 31281            | 21791 |     | 20189 |      |   |
| 46.9978251214112 | 75    | 150 | 0     | Open | ; |
| 31282            | 18477 |     | 22304 |      |   |
| 46.9996147898305 | 100   | 140 | 0     | Open | ; |
| 31283            | 20637 |     | 20638 |      |   |
| 47.0001223327517 | 200   | 140 | 0     | Open | ; |
| 31284            | 22697 |     | 23085 |      |   |
| 47.0011199285947 | 100   | 140 | 0     | Open | ; |
| 31285            | 19044 |     | 23001 |      |   |
| 47.0129676411059 | 100   | 140 | 0     | Open | ; |
| 31286            | 22791 |     | 20364 |      |   |
| 47.026692049888  | 75    | 140 | 0     | Open | ; |
| 31287            | 22487 |     | 22081 |      |   |

|                     |       |     |       |      |   |
|---------------------|-------|-----|-------|------|---|
| 47.0384706421898    | 110   | 150 | 0     | Open | ; |
| 31288               | 18479 |     | 19676 |      |   |
| 47.0576700570297    | 300   | 140 | 0     | Open | ; |
| 31289               | 23782 |     | 18786 |      |   |
| 47.0577416039728    | 75    | 140 | 0     | Open | ; |
| 31290               | 19873 |     | 22955 |      |   |
| 47.1077415004554    | 110   | 150 | 0     | Open | ; |
| 31291               | 21553 |     | 23411 |      |   |
| 47.111271329929 110 |       | 150 | 0     | Open | ; |
| 31292               | 23752 |     | 23474 |      |   |
| 47.1164759225331    | 160   | 150 | 0     | Open | ; |
| 31293               | 21814 |     | 21815 |      |   |
| 47.2066202357047    | 110   | 150 | 0     | Open | ; |
| 31295               | 19507 |     | 22856 |      |   |
| 47.2398033708522    | 100   | 140 | 0     | Open | ; |
| 31296               | 21820 |     | 21975 |      |   |
| 47.248807044159 150 |       | 140 | 0     | Open | ; |
| 31297               | 20500 |     | 20223 |      |   |
| 50.3534193034566    | 150   | 140 | 0     | Open | ; |
| 31298               | 20223 |     | 20224 |      |   |
| 47.2682853174078    | 150   | 140 | 0     | Open | ; |
| 31299               | 24845 |     | 24846 |      |   |
| 47.2858403390156    | 75    | 150 | 0     | Open | ; |
| 31300               | 19096 |     | 23014 |      |   |
| 47.3020830428931    | 110   | 150 | 0     | Open | ; |
| 31301               | 24830 |     | 24831 |      |   |
| 47.3063490666039    | 110   | 150 | 0     | Open | ; |
| 31302               | 20982 |     | 23226 |      |   |
| 47.3344650591618    | 75    | 140 | 0     | Open | ; |
| 31303               | 21273 |     | 22797 |      |   |
| 47.3973151261254    | 75    | 140 | 0     | Open | ; |
| 31304               | 22017 |     | 23105 |      |   |
| 67.0504844047908    | 110   | 150 | 0     | Open | ; |
| 31305               | 24837 |     | 24838 |      |   |
| 47.4210840857654    | 110   | 150 | 0     | Open | ; |
| 31306               | 19012 |     | 19001 |      |   |
| 47.4245144419509    | 110   | 150 | 0     | Open | ; |
| 31307               | 24232 |     | 24233 |      |   |
| 49.1423770955419    | 110   | 150 | 0     | Open | ; |
| 31308               | 20368 |     | 19040 |      |   |
| 42.6074465339263    | 100   | 140 | 0     | Open | ; |
| 31309               | 18673 |     | 23317 |      |   |
| 47.5005692393602    | 75    | 140 | 0     | Open | ; |
| 31310               | 21028 |     | 20102 |      |   |
| 47.4969532027447    | 100   | 140 | 0     | Open | ; |
| 31311               | 22470 |     | 22471 |      |   |
| 47.4972236855629    | 100   | 140 | 0     | Open | ; |
| 31312               | 24561 |     | 24562 |      |   |
| 39.8938341166132    | 110   | 150 | 0     | Open | ; |
| 31313               | 21056 |     | 21851 |      |   |



|                     |       |     |       |      |   |
|---------------------|-------|-----|-------|------|---|
| 39.8944695556342    | 140   | 150 | 0     | Open | ; |
| 31314               | 19879 |     | 22766 |      |   |
| 39.9096272191634    | 200   | 150 | 0     | Open | ; |
| 31315               | 19206 |     | 18482 |      |   |
| 39.9174862388013    | 110   | 150 | 0     | Open | ; |
| 31316               | 21763 |     | 21764 |      |   |
| 39.9239003737414    | 75    | 150 | 0     | Open | ; |
| 31317               | 24584 |     | 24583 |      |   |
| 39.9462363353673    | 110   | 150 | 0     | Open | ; |
| 31318               | 22420 |     | 20934 |      |   |
| 39.9640996827855    | 125   | 150 | 0     | Open | ; |
| 31319               | 21554 |     | 24967 |      |   |
| 41.0355028823977    | 110   | 150 | 0     | Open | ; |
| 31320               | 19519 |     | 20006 |      |   |
| 39.9702208679841    | 75    | 100 | 0     | Open | ; |
| 31321               | 20968 |     | 24595 |      |   |
| 39.977246513515 110 |       | 150 | 0     | Open | ; |
| 31322               | 22416 |     | 22417 |      |   |
| 39.9976384940135    | 125   | 150 | 0     | Open | ; |
| 31323               | 23320 |     | 23321 |      |   |
| 39.9902598756614    | 75    | 140 | 0     | Open | ; |
| 31324               | 19804 |     | 19805 |      |   |
| 39.9926570532743    | 110   | 150 | 0     | Open | ; |
| 31325               | 20891 |     | 21309 |      |   |
| 39.9973058229003    | 110   | 150 | 0     | Open | ; |
| 31326               | 24831 |     | 24868 |      |   |
| 39.993120729473 110 |       | 150 | 0     | Open | ; |
| 31327               | 21530 |     | 21170 |      |   |
| 39.9967093691562    | 160   | 150 | 0     | Open | ; |
| 31328               | 20591 |     | 24567 |      |   |
| 39.9969848605825    | 110   | 150 | 0     | Open | ; |
| 31329               | 21785 |     | 24006 |      |   |
| 39.9969868863481    | 110   | 150 | 0     | Open | ; |
| 31330               | 20782 |     | 20475 |      |   |
| 39.9975381178786    | 110   | 150 | 0     | Open | ; |
| 31331               | 22624 |     | 20471 |      |   |
| 39.9975381180668    | 110   | 150 | 0     | Open | ; |
| 31332               | 23269 |     | 21495 |      |   |
| 39.9975529804206    | 110   | 150 | 0     | Open | ; |
| 31333               | 22606 |     | 18989 |      |   |
| 39.9975585136556    | 110   | 150 | 0     | Open | ; |
| 31334               | 22316 |     | 20477 |      |   |
| 39.9975585136556    | 110   | 150 | 0     | Open | ; |
| 31335               | 21512 |     | 21513 |      |   |
| 39.9975706147635    | 75    | 150 | 0     | Open | ; |
| 31336               | 23471 |     | 19456 |      |   |
| 39.9975904939913    | 110   | 150 | 0     | Open | ; |
| 31337               | 23639 |     | 20493 |      |   |
| 39.9975928687749    | 75    | 150 | 0     | Open | ; |
| 31338               | 19889 |     | 20094 |      |   |

|                     |       |     |       |      |   |
|---------------------|-------|-----|-------|------|---|
| 39.9976240246045    | 75    | 150 | 0     | Open | ; |
| 31339               | 22434 |     | 22436 |      |   |
| 39.9976290776815    | 110   | 150 | 0     | Open | ; |
| 31340               | 20667 |     | 20668 |      |   |
| 39.9976443857652    | 110   | 150 | 0     | Open | ; |
| 31341               | 24242 |     | 22071 |      |   |
| 39.9976443866495    | 200   | 150 | 0     | Open | ; |
| 31342               | 21926 |     | 20712 |      |   |
| 39.997644387405 110 |       | 150 | 0     | Open | ; |
| 31343               | 22900 |     | 20605 |      |   |
| 39.9976538549989    | 75    | 150 | 0     | Open | ; |
| 31344               | 22607 |     | 20473 |      |   |
| 39.9976564123306    | 110   | 150 | 0     | Open | ; |
| 31345               | 20781 |     | 20602 |      |   |
| 39.9976564123306    | 110   | 150 | 0     | Open | ; |
| 31346               | 18931 |     | 19623 |      |   |
| 39.9976629563655    | 200   | 150 | 0     | Open | ; |
| 31347               | 19132 |     | 19133 |      |   |
| 39.9976661106838    | 75    | 140 | 0     | Open | ; |
| 31348               | 18990 |     | 18988 |      |   |
| 39.9976803809067    | 160   | 150 | 0     | Open | ; |
| 31349               | 22901 |     | 22822 |      |   |
| 39.9976906187463    | 75    | 150 | 0     | Open | ; |
| 31350               | 23067 |     | 22820 |      |   |
| 39.9976906196542    | 75    | 150 | 0     | Open | ; |
| 31351               | 21210 |     | 22460 |      |   |
| 39.9976908194941    | 75    | 140 | 0     | Open | ; |
| 31352               | 18647 |     | 23726 |      |   |
| 39.9976914963376    | 75    | 140 | 0     | Open | ; |
| 31353               | 18992 |     | 18990 |      |   |
| 39.9977014402877    | 160   | 150 | 0     | Open | ; |
| 31354               | 20125 |     | 21963 |      |   |
| 39.9977182890674    | 150   | 140 | 0     | Open | ; |
| 31355               | 21669 |     | 20009 |      |   |
| 39.9977246108348    | 75    | 150 | 0     | Open | ; |
| 31356               | 20311 |     | 20312 |      |   |
| 39.9977290765966    | 110   | 150 | 0     | Open | ; |
| 31357               | 22436 |     | 22466 |      |   |
| 39.9977296805102    | 110   | 150 | 0     | Open | ; |
| 31358               | 20472 |     | 20474 |      |   |
| 39.9977339149813    | 160   | 150 | 0     | Open | ; |
| 31359               | 21094 |     | 19359 |      |   |
| 39.9977421550386    | 150   | 140 | 0     | Open | ; |
| 31360               | 19282 |     | 21094 |      |   |
| 39.997742155433 150 |       | 140 | 0     | Open | ; |
| 31361               | 19145 |     | 22704 |      |   |
| 39.9977426464114    | 110   | 150 | 0     | Open | ; |
| 31362               | 19281 |     | 19282 |      |   |
| 39.9977421550719    | 150   | 140 | 0     | Open | ; |
| 31363               | 20762 |     | 20668 |      |   |

|                  |       |     |       |      |   |
|------------------|-------|-----|-------|------|---|
| 39.9977426468271 | 110   | 150 | 0     | Open | ; |
| 31364            | 22645 |     | 22454 |      |   |
| 39.9977442484118 | 160   | 150 | 0     | Open | ; |
| 31365            | 19605 |     | 19603 |      |   |
| 39.9977442493344 | 160   | 150 | 0     | Open | ; |
| 31366            | 22202 |     | 22387 |      |   |
| 39.9977426464114 | 200   | 150 | 0     | Open | ; |
| 31367            | 19603 |     | 22645 |      |   |
| 39.9977448594912 | 160   | 150 | 0     | Open | ; |
| 31368            | 20316 |     | 22069 |      |   |
| 39.9977426468271 | 160   | 150 | 0     | Open | ; |
| 31369            | 21174 |     | 18501 |      |   |
| 39.9977533812403 | 110   | 150 | 0     | Open | ; |
| 31370            | 20476 |     | 20472 |      |   |
| 39.9977543095165 | 160   | 150 | 0     | Open | ; |
| 31371            | 18988 |     | 20601 |      |   |
| 39.9977543104197 | 160   | 150 | 0     | Open | ; |
| 31372            | 21342 |     | 21167 |      |   |
| 39.9977543588646 | 110   | 150 | 0     | Open | ; |
| 31373            | 20816 |     | 19626 |      |   |
| 39.9977612166861 | 110   | 150 | 0     | Open | ; |
| 31374            | 20667 |     | 20566 |      |   |
| 39.9977612175926 | 110   | 150 | 0     | Open | ; |
| 31375            | 21149 |     | 18739 |      |   |
| 39.9977780300723 | 140   | 150 | 0     | Open | ; |
| 31376            | 18647 |     | 18648 |      |   |
| 39.99777838074   | 75    | 140 | 0     | Open | ; |
| 31377            | 21940 |     | 21941 |      |   |
| 39.9978414632221 | 75    | 140 | 0     | Open | ; |
| 31378            | 20788 |     | 22333 |      |   |
| 39.9978424785821 | 110   | 150 | 0     | Open | ; |
| 31379            | 20502 |     | 23443 |      |   |
| 39.9978491759988 | 75    | 140 | 0     | Open | ; |
| 31380            | 19408 |     | 21039 |      |   |
| 39.9978703453351 | 100   | 140 | 0     | Open | ; |
| 31381            | 19456 |     | 19457 |      |   |
| 39.997964909672  | 110   | 150 | 0     | Open | ; |
| 31382            | 18724 |     | 19232 |      |   |
| 39.9980747308871 | 110   | 150 | 0     | Open | ; |
| 31383            | 19437 |     | 19438 |      |   |
| 39.9980966773105 | 75    | 150 | 0     | Open | ; |
| 31384            | 21454 |     | 21530 |      |   |
| 39.9986601237894 | 160   | 150 | 0     | Open | ; |
| 31385            | 18683 |     | 23292 |      |   |
| 39.9983475290173 | 100   | 140 | 0     | Open | ; |
| 31386            | 20125 |     | 21487 |      |   |
| 39.9988178734152 | 150   | 140 | 0     | Open | ; |
| 31387            | 19908 |     | 22999 |      |   |
| 39.9985879769817 | 150   | 140 | 0     | Open | ; |
| 31388            | 21191 |     | 21195 |      |   |

|                  |       |     |       |      |   |
|------------------|-------|-----|-------|------|---|
| 39.9986539073331 | 100   | 140 | 0     | Open | ; |
| 31389            | 19457 |     | 19944 |      |   |
| 40.0054675734282 | 110   | 150 | 0     | Open | ; |
| 31390            | 21178 |     | 19202 |      |   |
| 39.9992554517514 | 110   | 150 | 0     | Open | ; |
| 31391            | 18776 |     | 21454 |      |   |
| 40.0000614837965 | 160   | 150 | 0     | Open | ; |
| 31392            | 19607 |     | 19605 |      |   |
| 40.0887401637445 | 160   | 150 | 0     | Open | ; |
| 31393            | 19279 |     | 19280 |      |   |
| 40.0093493064895 | 150   | 140 | 0     | Open | ; |
| 31394            | 21963 |     | 19281 |      |   |
| 40.0160942116316 | 150   | 140 | 0     | Open | ; |
| 31395            | 20551 |     | 20308 |      |   |
| 40.0466408474857 | 110   | 150 | 0     | Open | ; |
| 31396            | 23162 |     | 24656 |      |   |
| 40.0408603288355 | 75    | 150 | 0     | Open | ; |
| 31397            | 22690 |     | 22451 |      |   |
| 40.0458396745603 | 110   | 150 | 0     | Open | ; |
| 31398            | 19626 |     | 22428 |      |   |
| 41.9976687864115 | 110   | 150 | 0     | Open | ; |
| 31399            | 24628 |     | 24623 |      |   |
| 40.0519261153068 | 110   | 150 | 0     | Open | ; |
| 31400            | 24616 |     | 24578 |      |   |
| 40.0565752560934 | 110   | 150 | 0     | Open | ; |
| 31401            | 21664 |     | 21665 |      |   |
| 40.0751883305509 | 200   | 140 | 0     | Open | ; |
| 31402            | 20732 |     | 20192 |      |   |
| 40.0829289265174 | 100   | 140 | 0     | Open | ; |
| 31403            | 23158 |     | 23156 |      |   |
| 40.0999457260044 | 110   | 150 | 0     | Open | ; |
| 31404            | 19090 |     | 19131 |      |   |
| 40.1002823680456 | 75    | 150 | 0     | Open | ; |
| 31405            | 24490 |     | 24491 |      |   |
| 40.1070652001303 | 110   | 150 | 0     | Open | ; |
| 31406            | 19352 |     | 19354 |      |   |
| 40.1225639538787 | 110   | 150 | 0     | Open | ; |
| 31407            | 19088 |     | 20633 |      |   |
| 40.1454537437208 | 125   | 150 | 0     | Open | ; |
| 31408            | 24465 |     | 24482 |      |   |
| 40.1750717369156 | 110   | 150 | 0     | Open | ; |
| 31409            | 21416 |     | 21417 |      |   |
| 40.1776845689929 | 100   | 140 | 0     | Open | ; |
| 31410            | 20032 |     | 21790 |      |   |
| 40.1801531490627 | 75    | 140 | 0     | Open | ; |
| 31411            | 22660 |     | 23627 |      |   |
| 40.2011210859741 | 100   | 140 | 0     | Open | ; |
| 31412            | 21789 |     | 20929 |      |   |
| 40.2036375988359 | 75    | 150 | 0     | Open | ; |
| 31413            | 21151 |     | 24657 |      |   |

|                  |       |     |       |      |   |
|------------------|-------|-----|-------|------|---|
| 40.250647829886  | 160   | 150 | 0     | Open | ; |
| 31415            | 20460 |     | 23514 |      |   |
| 40.2883102142643 | 75    | 140 | 0     | Open | ; |
| 31416            | 18736 |     | 21211 |      |   |
| 40.2908679981779 | 75    | 150 | 0     | Open | ; |
| 31417            | 20036 |     | 20635 |      |   |
| 40.2991815702793 | 75    | 140 | 0     | Open | ; |
| 31418            | 19929 |     | 19930 |      |   |
| 40.3088878965895 | 75    | 150 | 0     | Open | ; |
| 31419            | 21969 |     | 21970 |      |   |
| 40.3197169059997 | 125   | 140 | 0     | Open | ; |
| 31420            | 21929 |     | 21927 |      |   |
| 40.3227051789376 | 110   | 150 | 0     | Open | ; |
| 31421            | 21325 |     | 19845 |      |   |
| 40.3374551785583 | 100   | 140 | 0     | Open | ; |
| 31422            | 24779 |     | 24789 |      |   |
| 40.3456306382344 | 160   | 150 | 0     | Open | ; |
| 31423            | 18824 |     | 19913 |      |   |
| 40.3599849555099 | 100   | 140 | 0     | Open | ; |
| 31424            | 18924 |     | 18925 |      |   |
| 40.3662760217296 | 110   | 150 | 0     | Open | ; |
| 31425            | 20211 |     | 20212 |      |   |
| 40.3699098185312 | 200   | 140 | 0     | Open | ; |
| 31426            | 22232 |     | 22846 |      |   |
| 40.176759527512  | 140   | 150 | 0     | Open | ; |
| 31427            | 21177 |     | 23622 |      |   |
| 40.3984390548319 | 100   | 140 | 0     | Open | ; |
| 31428            | 24922 |     | 24923 |      |   |
| 40.4149503592564 | 110   | 150 | 0     | Open | ; |
| 31429            | 19952 |     | 19951 |      |   |
| 40.4191194219578 | 100   | 140 | 0     | Open | ; |
| 31430            | 23227 |     | 23228 |      |   |
| 40.4239749413841 | 100   | 140 | 0     | Open | ; |
| 31431            | 23653 |     | 23654 |      |   |
| 40.4361274115668 | 75    | 150 | 0     | Open | ; |
| 31432            | 23518 |     | 21000 |      |   |
| 40.4971547917297 | 200   | 150 | 0     | Open | ; |
| 31433            | 21456 |     | 18746 |      |   |
| 40.4974132457206 | 160   | 150 | 0     | Open | ; |
| 31434            | 21473 |     | 21204 |      |   |
| 40.4977574893169 | 160   | 150 | 0     | Open | ; |
| 31435            | 19202 |     | 19274 |      |   |
| 40.5036208513805 | 110   | 150 | 0     | Open | ; |
| 31436            | 24664 |     | 24667 |      |   |
| 40.5171236462074 | 110   | 150 | 0     | Open | ; |
| 31437            | 24880 |     | 24881 |      |   |
| 40.531453754553  | 75    | 150 | 0     | Open | ; |
| 31438            | 20389 |     | 24050 |      |   |
| 169.668601335417 | 110   | 150 | 0     | Open | ; |
| 31439            | 24028 |     | 18830 |      |   |

|                     |       |     |       |  |      |   |
|---------------------|-------|-----|-------|--|------|---|
| 50.1173685409179    | 110   | 150 | 0     |  | Open | ; |
| 31440               | 23605 |     | 22636 |  |      |   |
| 40.569681366878 160 |       | 150 | 0     |  | Open | ; |
| 31441               | 19307 |     | 18741 |  |      |   |
| 40.5761861419101    | 100   | 140 | 0     |  | Open | ; |
| 31442               | 19204 |     | 19206 |  |      |   |
| 41.7536432395166    | 110   | 150 | 0     |  | Open | ; |
| 31443               | 22105 |     | 22106 |  |      |   |
| 40.5868090115882    | 110   | 150 | 0     |  | Open | ; |
| 31444               | 23597 |     | 23598 |  |      |   |
| 40.5890950250873    | 75    | 140 | 0     |  | Open | ; |
| 31445               | 19511 |     | 21784 |  |      |   |
| 40.5905878676016    | 100   | 140 | 0     |  | Open | ; |
| 31446               | 19514 |     | 21738 |  |      |   |
| 40.5948156884774    | 110   | 150 | 0     |  | Open | ; |
| 31447               | 24798 |     | 24800 |  |      |   |
| 40.5999710756974    | 110   | 150 | 0     |  | Open | ; |
| 31448               | 24796 |     | 24798 |  |      |   |
| 40.6000075127495    | 110   | 150 | 0     |  | Open | ; |
| 31449               | 19950 |     | 19951 |  |      |   |
| 40.6049834234442    | 100   | 140 | 0     |  | Open | ; |
| 31450               | 19377 |     | 19378 |  |      |   |
| 40.608895172069 110 |       | 150 | 0     |  | Open | ; |
| 31451               | 18953 |     | 18954 |  |      |   |
| 40.6336799449864    | 110   | 150 | 0     |  | Open | ; |
| 31452               | 18592 |     | 18593 |  |      |   |
| 40.6425218996869    | 110   | 150 | 0     |  | Open | ; |
| 31453               | 20952 |     | 22390 |  |      |   |
| 40.6502100670673    | 110   | 150 | 0     |  | Open | ; |
| 31454               | 24691 |     | 24692 |  |      |   |
| 40.6667689750653    | 160   | 150 | 0     |  | Open | ; |
| 31455               | 24885 |     | 24888 |  |      |   |
| 40.6680289078518    | 110   | 150 | 0     |  | Open | ; |
| 31456               | 20051 |     | 20743 |  |      |   |
| 42.4976980708553    | 110   | 150 | 0     |  | Open | ; |
| 31457               | 25008 |     | 25154 |  |      |   |
| 42.5466555495446    | 140   | 150 | 0     |  | Open | ; |
| 31458               | 24318 |     | 19123 |  |      |   |
| 40.6720363125857    | 75    | 140 | 0     |  | Open | ; |
| 31459               | 23209 |     | 22536 |  |      |   |
| 40.7010405302023    | 110   | 150 | 0     |  | Open | ; |
| 31460               | 19890 |     | 20892 |  |      |   |
| 40.7205917928171    | 200   | 150 | 0     |  | Open | ; |
| 31461               | 22614 |     | 19573 |  |      |   |
| 40.7361776538369    | 100   | 140 | 0     |  | Open | ; |
| 31462               | 20273 |     | 19771 |  |      |   |
| 42.7954084390408    | 250   | 140 | 0     |  | Open | ; |
| 31463               | 20352 |     | 24479 |  |      |   |
| 40.7738425021222    | 140   | 150 | 0     |  | Open | ; |
| 31464               | 24615 |     | 24629 |  |      |   |

|                     |       |     |       |      |   |
|---------------------|-------|-----|-------|------|---|
| 40.7911249526119    | 160   | 150 | 0     | Open | ; |
| 31465               | 20466 |     | 20441 |      |   |
| 40.8075442504707    | 140   | 150 | 0     | Open | ; |
| 31466               | 19381 |     | 19382 |      |   |
| 40.8269552556483    | 75    | 140 | 0     | Open | ; |
| 31467               | 19072 |     | 22232 |      |   |
| 40.8428043241681    | 140   | 150 | 0     | Open | ; |
| 31468               | 18926 |     | 18924 |      |   |
| 40.842858396704 110 |       | 150 | 0     | Open | ; |
| 31469               | 20512 |     | 23450 |      |   |
| 40.8606911901158    | 110   | 150 | 0     | Open | ; |
| 31470               | 21887 |     | 22734 |      |   |
| 40.8725674341448    | 110   | 150 | 0     | Open | ; |
| 31471               | 20652 |     | 20480 |      |   |
| 40.879983023515 125 |       | 150 | 0     | Open | ; |
| 31472               | 23479 |     | 20262 |      |   |
| 40.8921765558303    | 250   | 100 | 0     | Open | ; |
| 31473               | 24262 |     | 20820 |      |   |
| 96.8927311760523    | 75    | 140 | 0     | Open | ; |
| 31474               | 21314 |     | 21315 |      |   |
| 40.9246614674862    | 110   | 150 | 0     | Open | ; |
| 31475               | 20603 |     | 24420 |      |   |
| 40.9275774510817    | 200   | 150 | 0     | Open | ; |
| 31476               | 19790 |     | 19791 |      |   |
| 40.9286620984503    | 150   | 140 | 0     | Open | ; |
| 31477               | 20306 |     | 22461 |      |   |
| 40.9361363789536    | 100   | 140 | 0     | Open | ; |
| 31478               | 18725 |     | 19229 |      |   |
| 40.9380119757172    | 75    | 150 | 0     | Open | ; |
| 31479               | 20109 |     | 22407 |      |   |
| 40.9423141639427    | 200   | 150 | 0     | Open | ; |
| 31480               | 22441 |     | 18556 |      |   |
| 40.9564785258645    | 110   | 150 | 0     | Open | ; |
| 31481               | 20658 |     | 20654 |      |   |
| 157.858104174314    | 110   | 150 | 0     | Open | ; |
| 31482               | 23111 |     | 23112 |      |   |
| 40.9708171157967    | 125   | 150 | 0     | Open | ; |
| 31483               | 19066 |     | 19064 |      |   |
| 40.9881723897032    | 140   | 150 | 0     | Open | ; |
| 31484               | 19092 |     | 19093 |      |   |
| 40.9958953163788    | 75    | 150 | 0     | Open | ; |
| 31485               | 23042 |     | 23043 |      |   |
| 40.9964138025366    | 75    | 150 | 0     | Open | ; |
| 31486               | 19788 |     | 19789 |      |   |
| 40.9974656636686    | 75    | 150 | 0     | Open | ; |
| 31487               | 22840 |     | 20842 |      |   |
| 40.9974803844306    | 150   | 140 | 0     | Open | ; |
| 31488               | 19633 |     | 20566 |      |   |
| 40.9975026102031    | 110   | 150 | 0     | Open | ; |
| 31489               | 23372 |     | 21499 |      |   |

|                  |       |     |       |      |   |
|------------------|-------|-----|-------|------|---|
| 40.9975372060768 | 110   | 150 | 0     | Open | ; |
| 31490            | 20762 |     | 19635 |      |   |
| 40.9975397510029 | 110   | 150 | 0     | Open | ; |
| 31491            | 19474 |     | 19241 |      |   |
| 40.9975523736744 | 100   | 140 | 0     | Open | ; |
| 31492            | 23043 |     | 23961 |      |   |
| 40.9975962287532 | 75    | 150 | 0     | Open | ; |
| 31493            | 21857 |     | 23024 |      |   |
| 40.9976767051951 | 100   | 100 | 0     | Open | ; |
| 31494            | 22870 |     | 20482 |      |   |
| 40.9976931748227 | 110   | 150 | 0     | Open | ; |
| 31495            | 19834 |     | 18741 |      |   |
| 40.9977296582843 | 100   | 140 | 0     | Open | ; |
| 31496            | 21239 |     | 21240 |      |   |
| 40.9977458359431 | 160   | 150 | 0     | Open | ; |
| 31497            | 21552 |     | 21178 |      |   |
| 40.997838522331  | 110   | 150 | 0     | Open | ; |
| 31498            | 22459 |     | 22425 |      |   |
| 40.9977813604914 | 75    | 140 | 0     | Open | ; |
| 31499            | 22922 |     | 22923 |      |   |
| 40.9983617028407 | 75    | 140 | 0     | Open | ; |
| 31500            | 21527 |     | 21911 |      |   |
| 41.0018672162527 | 110   | 150 | 0     | Open | ; |
| 31502            | 19648 |     | 21274 |      |   |
| 41.0146757315724 | 75    | 140 | 0     | Open | ; |
| 31503            | 24613 |     | 24595 |      |   |
| 41.0673281507731 | 160   | 150 | 0     | Open | ; |
| 31504            | 20294 |     | 20469 |      |   |
| 41.0740696942495 | 110   | 150 | 0     | Open | ; |
| 31505            | 24586 |     | 24584 |      |   |
| 41.0935576031947 | 110   | 150 | 0     | Open | ; |
| 31506            | 18581 |     | 18582 |      |   |
| 41.0948903050059 | 160   | 150 | 0     | Open | ; |
| 31507            | 20305 |     | 20306 |      |   |
| 41.1175646448549 | 100   | 140 | 0     | Open | ; |
| 31508            | 22716 |     | 22717 |      |   |
| 41.1217828328911 | 110   | 150 | 0     | Open | ; |
| 31509            | 19901 |     | 24747 |      |   |
| 41.1439372162271 | 160   | 150 | 0     | Open | ; |
| 31510            | 22617 |     | 22618 |      |   |
| 41.2002844798482 | 110   | 150 | 0     | Open | ; |
| 31511            | 20160 |     | 19164 |      |   |
| 41.2093121189231 | 125   | 140 | 0     | Open | ; |
| 31512            | 24747 |     | 24750 |      |   |
| 50.2261022242669 | 160   | 150 | 0     | Open | ; |
| 31513            | 22295 |     | 24586 |      |   |
| 41.2949789401652 | 110   | 150 | 0     | Open | ; |
| 31514            | 21639 |     | 22137 |      |   |
| 41.2975483660438 | 75    | 150 | 0     | Open | ; |
| 31515            | 24517 |     | 24525 |      |   |



|                  |       |     |       |      |   |
|------------------|-------|-----|-------|------|---|
| 41.3283436385412 | 110   | 150 | 0     | Open | ; |
| 31516            | 24837 |     | 24840 |      |   |
| 41.3323991530894 | 140   | 150 | 0     | Open | ; |
| 31517            | 23929 |     | 23930 |      |   |
| 41.3448730225428 | 100   | 140 | 0     | Open | ; |
| 31518            | 20624 |     | 20625 |      |   |
| 41.3593989704134 | 75    | 150 | 0     | Open | ; |
| 31519            | 20709 |     | 20705 |      |   |
| 41.4115672301662 | 200   | 150 | 0     | Open | ; |
| 31520            | 18554 |     | 18555 |      |   |
| 41.4394513357665 | 110   | 150 | 0     | Open | ; |
| 31521            | 23209 |     | 20950 |      |   |
| 41.4603311062592 | 110   | 150 | 0     | Open | ; |
| 31522            | 23448 |     | 24199 |      |   |
| 41.4631426887061 | 150   | 140 | 0     | Open | ; |
| 31523            | 21698 |     | 19061 |      |   |
| 41.4648636587022 | 75    | 150 | 0     | Open | ; |
| 31524            | 24022 |     | 19884 |      |   |
| 41.8283357629232 | 200   | 150 | 0     | Open | ; |
| 31525            | 23032 |     | 20644 |      |   |
| 41.4965968681768 | 100   | 140 | 0     | Open | ; |
| 31526            | 21691 |     | 21692 |      |   |
| 41.497466816553  | 110   | 150 | 0     | Open | ; |
| 31527            | 21153 |     | 21158 |      |   |
| 41.4975830537573 | 160   | 150 | 0     | Open | ; |
| 31528            | 19271 |     | 19272 |      |   |
| 41.4976684691427 | 110   | 150 | 0     | Open | ; |
| 31529            | 24570 |     | 24468 |      |   |
| 41.5158933663178 | 140   | 150 | 0     | Open | ; |
| 31530            | 24462 |     | 24463 |      |   |
| 41.5385707643869 | 110   | 150 | 0     | Open | ; |
| 31531            | 21142 |     | 21156 |      |   |
| 43.4976721741115 | 160   | 150 | 0     | Open | ; |
| 31532            | 21650 |     | 20177 |      |   |
| 41.5247745384027 | 160   | 150 | 0     | Open | ; |
| 31533            | 23578 |     | 23579 |      |   |
| 41.5378842288118 | 90    | 150 | 0     | Open | ; |
| 31534            | 18497 |     | 22053 |      |   |
| 41.5388027016424 | 110   | 150 | 0     | Open | ; |
| 31535            | 21083 |     | 20049 |      |   |
| 41.5613738665818 | 125   | 150 | 0     | Open | ; |
| 31536            | 18740 |     | 18879 |      |   |
| 41.5691473816543 | 110   | 150 | 0     | Open | ; |
| 31537            | 22323 |     | 22324 |      |   |
| 41.5885389615392 | 160   | 150 | 0     | Open | ; |
| 31538            | 23878 |     | 19125 |      |   |
| 41.5930201788229 | 75    | 140 | 0     | Open | ; |
| 31539            | 21234 |     | 21820 |      |   |
| 41.623498283473  | 150   | 140 | 0     | Open | ; |
| 31540            | 24616 |     | 24617 |      |   |

|                     |       |     |       |      |   |
|---------------------|-------|-----|-------|------|---|
| 41.6473250225765    | 160   | 150 | 0     | Open | ; |
| 31541               | 20134 |     | 22214 |      |   |
| 41.6694605845381    | 150   | 140 | 0     | Open | ; |
| 31542               | 24739 |     | 24740 |      |   |
| 41.6700280056091    | 110   | 150 | 0     | Open | ; |
| 31543               | 20594 |     | 23762 |      |   |
| 43.5976905711994    | 110   | 150 | 0     | Open | ; |
| 31544               | 21626 |     | 19070 |      |   |
| 41.7144453761038    | 110   | 150 | 0     | Open | ; |
| 31545               | 19857 |     | 19858 |      |   |
| 41.7344621274642    | 110   | 150 | 0     | Open | ; |
| 31546               | 19515 |     | 19931 |      |   |
| 41.7789918945424    | 110   | 150 | 0     | Open | ; |
| 31547               | 23103 |     | 23104 |      |   |
| 41.7842404846646    | 90    | 150 | 0     | Open | ; |
| 31548               | 24693 |     | 23176 |      |   |
| 41.790849387731 160 |       | 150 | 0     | Open | ; |
| 31549               | 22237 |     | 23208 |      |   |
| 41.7975358375805    | 100   | 140 | 0     | Open | ; |
| 31550               | 19687 |     | 22744 |      |   |
| 41.8133353489864    | 110   | 150 | 0     | Open | ; |
| 31551               | 23172 |     | 23170 |      |   |
| 41.808190213779 110 |       | 150 | 0     | Open | ; |
| 31552               | 19755 |     | 19756 |      |   |
| 96.6347469366523    | 75    | 150 | 0     | Open | ; |
| 31553               | 25018 |     | 19328 |      |   |
| 98.9944549670302    | 110   | 150 | 0     | Open | ; |
| 31554               | 21103 |     | 21230 |      |   |
| 96.9722299896245    | 400   | 130 | 0     | Open | ; |
| 31555               | 23234 |     | 22796 |      |   |
| 96.9944382343716    | 75    | 150 | 0     | Open | ; |
| 31556               | 19945 |     | 24961 |      |   |
| 138.979936229997    | 75    | 150 | 0     | Open | ; |
| 31557               | 22828 |     | 22826 |      |   |
| 97.0677461377717    | 75    | 140 | 0     | Open | ; |
| 31558               | 21721 |     | 21722 |      |   |
| 97.1248788164255    | 100   | 140 | 0     | Open | ; |
| 31559               | 18761 |     | 19014 |      |   |
| 103.142024897473    | 125   | 150 | 0     | Open | ; |
| 31560               | 22092 |     | 22093 |      |   |
| 97.2721705942561    | 110   | 150 | 0     | Open | ; |
| 31561               | 19828 |     | 19829 |      |   |
| 97.3252464925321    | 110   | 150 | 0     | Open | ; |
| 31563               | 20246 |     | 22504 |      |   |
| 123.569589102949    | 125   | 150 | 0     | Open | ; |
| 31564               | 23012 |     | 24083 |      |   |
| 97.4413475648677    | 160   | 150 | 0     | Open | ; |
| 31565               | 23328 |     | 23928 |      |   |
| 97.5457546537059    | 75    | 140 | 0     | Open | ; |
| 31566               | 21485 |     | 21486 |      |   |

|                  |       |     |       |      |   |
|------------------|-------|-----|-------|------|---|
| 97.6345283461681 | 200   | 150 | 0     | Open | ; |
| 31567            | 20187 |     | 19690 |      |   |
| 97.6741084841152 | 300   | 140 | 0     | Open | ; |
| 31568            | 19599 |     | 22195 |      |   |
| 97.7592907483876 | 160   | 150 | 0     | Open | ; |
| 31569            | 25153 |     | 25133 |      |   |
| 197.921843337099 | 110   | 150 | 0     | Open | ; |
| 31570            | 22994 |     | 21865 |      |   |
| 98.5246888271882 | 150   | 140 | 0     | Open | ; |
| 31571            | 22969 |     | 22970 |      |   |
| 97.9370246894465 | 75    | 150 | 0     | Open | ; |
| 31572            | 21620 |     | 20643 |      |   |
| 97.9683077045225 | 100   | 140 | 0     | Open | ; |
| 31573            | 23828 |     | 21562 |      |   |
| 97.9957671642395 | 110   | 150 | 0     | Open | ; |
| 31574            | 20221 |     | 20222 |      |   |
| 97.9960212133075 | 75    | 140 | 0     | Open | ; |
| 31575            | 24322 |     | 20543 |      |   |
| 98.0072797549475 | 110   | 150 | 0     | Open | ; |
| 31576            | 22649 |     | 20550 |      |   |
| 98.0467301759824 | 160   | 150 | 0     | Open | ; |
| 31577            | 23336 |     | 20385 |      |   |
| 98.0739448918883 | 100   | 140 | 0     | Open | ; |
| 31578            | 19682 |     | 23449 |      |   |
| 98.1735942165174 | 160   | 150 | 0     | Open | ; |
| 31579            | 22461 |     | 22286 |      |   |
| 98.1738646707655 | 100   | 140 | 0     | Open | ; |
| 31580            | 24784 |     | 24766 |      |   |
| 139.657030183531 | 110   | 150 | 0     | Open | ; |
| 31581            | 23110 |     | 19004 |      |   |
| 98.3188532250366 | 110   | 150 | 0     | Open | ; |
| 31582            | 18742 |     | 19338 |      |   |
| 130.071970185468 | 75    | 140 | 0     | Open | ; |
| 31583            | 21920 |     | 21921 |      |   |
| 98.4775352722651 | 75    | 150 | 0     | Open | ; |
| 31584            | 19813 |     | 19814 |      |   |
| 98.550800624756  | 100   | 140 | 0     | Open | ; |
| 31585            | 23115 |     | 19598 |      |   |
| 98.5559587074003 | 110   | 150 | 0     | Open | ; |
| 31586            | 22327 |     | 24323 |      |   |
| 98.7131497879279 | 110   | 150 | 0     | Open | ; |
| 31587            | 20359 |     | 22306 |      |   |
| 98.7943884954566 | 110   | 150 | 0     | Open | ; |
| 31588            | 23182 |     | 23183 |      |   |
| 98.8731606012627 | 200   | 150 | 0     | Open | ; |
| 31589            | 22307 |     | 19668 |      |   |
| 98.9942065285584 | 110   | 150 | 0     | Open | ; |
| 31590            | 19460 |     | 19461 |      |   |
| 98.9946138351016 | 110   | 150 | 0     | Open | ; |
| 31591            | 25148 |     | 20721 |      |   |

|                  |       |     |       |      |   |
|------------------|-------|-----|-------|------|---|
| 99.0463390819836 | 75    | 140 | 0     | Open | ; |
| 31592            | 21011 |     | 22178 |      |   |
| 99.0444824236137 | 100   | 140 | 0     | Open | ; |
| 31593            | 18642 |     | 21489 |      |   |
| 99.1037407543671 | 250   | 140 | 0     | Open | ; |
| 31594            | 19736 |     | 21290 |      |   |
| 99.1070066588913 | 100   | 140 | 0     | Open | ; |
| 31595            | 23031 |     | 23032 |      |   |
| 99.1122741462594 | 100   | 140 | 0     | Open | ; |
| 31596            | 24037 |     | 24038 |      |   |
| 99.1150115214899 | 110   | 150 | 0     | Open | ; |
| 31597            | 19355 |     | 19356 |      |   |
| 99.3042694917235 | 110   | 150 | 0     | Open | ; |
| 31598            | 18722 |     | 18723 |      |   |
| 99.4710609549023 | 160   | 150 | 0     | Open | ; |
| 31599            | 21964 |     | 21339 |      |   |
| 99.5134231181496 | 110   | 150 | 0     | Open | ; |
| 31600            | 23259 |     | 23258 |      |   |
| 99.5764420380561 | 140   | 150 | 0     | Open | ; |
| 31601            | 25045 |     | 19855 |      |   |
| 104.897183217872 | 160   | 150 | 0     | Open | ; |
| 31602            | 19561 |     | 20947 |      |   |
| 99.8399637598095 | 100   | 140 | 0     | Open | ; |
| 31603            | 21748 |     | 21046 |      |   |
| 99.8626071484016 | 100   | 140 | 0     | Open | ; |
| 31604            | 23390 |     | 19994 |      |   |
| 99.9231363677541 | 200   | 140 | 0     | Open | ; |
| 31605            | 24225 |     | 23284 |      |   |
| 99.9941955883481 | 125   | 140 | 0     | Open | ; |
| 31606            | 22134 |     | 22135 |      |   |
| 99.9942733757044 | 110   | 150 | 0     | Open | ; |
| 31607            | 23670 |     | 23671 |      |   |
| 99.9977864831587 | 150   | 140 | 0     | Open | ; |
| 31608            | 19749 |     | 19750 |      |   |
| 99.9994387586467 | 100   | 140 | 0     | Open | ; |
| 31609            | 22876 |     | 21020 |      |   |
| 100.001490305127 | 100   | 140 | 0     | Open | ; |
| 31610            | 24313 |     | 22117 |      |   |
| 100.042225865906 | 100   | 140 | 0     | Open | ; |
| 31611            | 22728 |     | 22729 |      |   |
| 100.284471613686 | 200   | 150 | 0     | Open | ; |
| 31612            | 18905 |     | 18906 |      |   |
| 100.298902210805 | 100   | 140 | 0     | Open | ; |
| 31613            | 19810 |     | 23265 |      |   |
| 100.306715436538 | 75    | 150 | 0     | Open | ; |
| 31614            | 20047 |     | 20354 |      |   |
| 100.306852910524 | 140   | 150 | 0     | Open | ; |
| 31615            | 22798 |     | 22799 |      |   |
| 100.38175140093  | 100   | 140 | 0     | Open | ; |
| 31616            | 18806 |     | 18807 |      |   |

|                     |       |     |       |      |   |
|---------------------|-------|-----|-------|------|---|
| 100.49443824946 110 |       | 150 | 0     | Open | ; |
| 31617               | 24857 |     | 24935 |      |   |
| 136.821302953647    | 110   | 150 | 0     | Open | ; |
| 31618               | 19418 |     | 19427 |      |   |
| 117.993305057904    | 110   | 150 | 0     | Open | ; |
| 31619               | 22009 |     | 22102 |      |   |
| 100.594110325195    | 75    | 150 | 0     | Open | ; |
| 31620               | 19680 |     | 19682 |      |   |
| 100.601362695907    | 160   | 150 | 0     | Open | ; |
| 31621               | 19843 |     | 23795 |      |   |
| 102.65109584365 125 |       | 140 | 0     | Open | ; |
| 31622               | 24245 |     | 24368 |      |   |
| 100.674750592669    | 75    | 140 | 0     | Open | ; |
| 31623               | 22343 |     | 24247 |      |   |
| 100.694159734418    | 75    | 140 | 0     | Open | ; |
| 31624               | 23818 |     | 19881 |      |   |
| 100.711689011072    | 125   | 100 | 0     | Open | ; |
| 31625               | 21867 |     | 21868 |      |   |
| 100.818263228494    | 100   | 140 | 0     | Open | ; |
| 31626               | 21800 |     | 21801 |      |   |
| 100.93909957205 75  |       | 150 | 0     | Open | ; |
| 31627               | 23668 |     | 24006 |      |   |
| 100.935708985907    | 110   | 150 | 0     | Open | ; |
| 31628               | 19596 |     | 20079 |      |   |
| 100.950004430475    | 110   | 150 | 0     | Open | ; |
| 31629               | 22829 |     | 20939 |      |   |
| 100.990640832358    | 160   | 150 | 0     | Open | ; |
| 31630               | 21802 |     | 21803 |      |   |
| 100.993836340425    | 75    | 150 | 0     | Open | ; |
| 31631               | 19330 |     | 21925 |      |   |
| 101.004286335449    | 110   | 150 | 0     | Open | ; |
| 31632               | 21916 |     | 19208 |      |   |
| 101.043148634482    | 75    | 150 | 0     | Open | ; |
| 31633               | 22180 |     | 24293 |      |   |
| 101.056094669404    | 75    | 140 | 0     | Open | ; |
| 31634               | 24053 |     | 19349 |      |   |
| 138.17190835426 110 |       | 150 | 0     | Open | ; |
| 31635               | 19990 |     | 19991 |      |   |
| 101.108758255316    | 200   | 100 | 0     | Open | ; |
| 31636               | 20423 |     | 21896 |      |   |
| 101.139280850268    | 110   | 150 | 0     | Open | ; |
| 31637               | 23300 |     | 23301 |      |   |
| 101.14181450977 75  |       | 150 | 0     | Open | ; |
| 31638               | 24295 |     | 24135 |      |   |
| 101.254872058246    | 75    | 140 | 0     | Open | ; |
| 31639               | 22425 |     | 19574 |      |   |
| 101.279102433152    | 75    | 140 | 0     | Open | ; |
| 31640               | 19575 |     | 21643 |      |   |
| 101.294198411487    | 100   | 140 | 0     | Open | ; |
| 31641               | 22765 |     | 22767 |      |   |

|                     |       |     |       |      |   |
|---------------------|-------|-----|-------|------|---|
| 101.309721763171    | 200   | 150 | 0     | Open | ; |
| 31642               | 20663 |     | 20664 |      |   |
| 101.694140511971    | 110   | 150 | 0     | Open | ; |
| 31643               | 23099 |     | 22576 |      |   |
| 101.701760911875    | 200   | 140 | 0     | Open | ; |
| 31644               | 22104 |     | 18783 |      |   |
| 101.740095059488    | 160   | 150 | 0     | Open | ; |
| 31645               | 21622 |     | 23031 |      |   |
| 101.787171229779    | 100   | 140 | 0     | Open | ; |
| 31646               | 22249 |     | 22250 |      |   |
| 101.794925504151    | 200   | 150 | 0     | Open | ; |
| 31647               | 24485 |     | 24486 |      |   |
| 101.822419081594    | 110   | 150 | 0     | Open | ; |
| 31648               | 21114 |     | 21374 |      |   |
| 101.929867246391    | 110   | 150 | 0     | Open | ; |
| 31649               | 21980 |     | 19765 |      |   |
| 123.173414924549    | 125   | 150 | 0     | Open | ; |
| 31650               | 24481 |     | 24484 |      |   |
| 102.000051755161    | 110   | 150 | 0     | Open | ; |
| 31651               | 23753 |     | 22946 |      |   |
| 105.923806209072    | 100   | 140 | 0     | Open | ; |
| 31652               | 25672 |     | 24451 |      |   |
| 105.855314517427    | 110   | 150 | 0     | Open | ; |
| 31653               | 24981 |     | 24982 |      |   |
| 115.274126365729    | 90    | 150 | 0     | Open | ; |
| 31654               | 22610 |     | 22611 |      |   |
| 102.168421241916    | 250   | 140 | 0     | Open | ; |
| 31655               | 22016 |     | 22017 |      |   |
| 102.253945639869    | 110   | 150 | 0     | Open | ; |
| 31656               | 20945 |     | 21301 |      |   |
| 102.27881440472 250 |       | 100 | 0     | Open | ; |
| 31657               | 24906 |     | 22256 |      |   |
| 102.299145979338    | 110   | 150 | 0     | Open | ; |
| 31658               | 21124 |     | 21125 |      |   |
| 102.423891167412    | 200   | 140 | 0     | Open | ; |
| 31659               | 21729 |     | 21730 |      |   |
| 102.543137313464    | 75    | 140 | 0     | Open | ; |
| 31660               | 24457 |     | 24714 |      |   |
| 102.570985757316    | 110   | 150 | 0     | Open | ; |
| 31661               | 24456 |     | 24699 |      |   |
| 102.682012859539    | 110   | 150 | 0     | Open | ; |
| 31662               | 24491 |     | 24492 |      |   |
| 103.030607280886    | 110   | 150 | 0     | Open | ; |
| 31663               | 20482 |     | 22872 |      |   |
| 102.733927927759    | 110   | 150 | 0     | Open | ; |
| 31664               | 22615 |     | 22616 |      |   |
| 102.736191766797    | 110   | 150 | 0     | Open | ; |
| 31665               | 23790 |     | 23386 |      |   |
| 102.993957900427    | 150   | 140 | 0     | Open | ; |
| 31666               | 19564 |     | 23268 |      |   |

|                  |       |     |       |      |   |
|------------------|-------|-----|-------|------|---|
| 102.994526430362 | 160   | 150 | 0     | Open | ; |
| 31667            | 19110 |     | 24122 |      |   |
| 103.455681526147 | 110   | 150 | 0     | Open | ; |
| 31668            | 23766 |     | 21016 |      |   |
| 103.112577075291 | 160   | 150 | 0     | Open | ; |
| 31669            | 23174 |     | 23175 |      |   |
| 103.262949790773 | 110   | 150 | 0     | Open | ; |
| 31670            | 19594 |     | 20080 |      |   |
| 103.288781909631 | 110   | 150 | 0     | Open | ; |
| 31671            | 21533 |     | 18534 |      |   |
| 103.294247244664 | 100   | 140 | 0     | Open | ; |
| 31672            | 20873 |     | 21399 |      |   |
| 133.507940829802 | 200   | 150 | 0     | Open | ; |
| 31673            | 22753 |     | 22379 |      |   |
| 103.323824205328 | 100   | 140 | 0     | Open | ; |
| 31674            | 23178 |     | 23179 |      |   |
| 103.386656599918 | 110   | 150 | 0     | Open | ; |
| 31675            | 23802 |     | 23803 |      |   |
| 103.419442797097 | 75    | 140 | 0     | Open | ; |
| 31676            | 21933 |     | 19094 |      |   |
| 103.496631168899 | 110   | 150 | 0     | Open | ; |
| 31677            | 22193 |     | 22732 |      |   |
| 103.873055338835 | 125   | 140 | 0     | Open | ; |
| 31678            | 21020 |     | 23305 |      |   |
| 103.801690647059 | 100   | 140 | 0     | Open | ; |
| 31679            | 24329 |     | 25014 |      |   |
| 103.808848563441 | 100   | 140 | 0     | Open | ; |
| 31680            | 20924 |     | 20883 |      |   |
| 105.994032925952 | 160   | 150 | 0     | Open | ; |
| 31681            | 24499 |     | 24898 |      |   |
| 111.747458106104 | 315   | 150 | 0     | Open | ; |
| 31682            | 18961 |     | 20801 |      |   |
| 103.994191565027 | 250   | 100 | 0     | Open | ; |
| 31683            | 23945 |     | 24649 |      |   |
| 103.998190177049 | 160   | 150 | 0     | Open | ; |
| 31684            | 24003 |     | 23944 |      |   |
| 103.999529815878 | 250   | 150 | 0     | Open | ; |
| 31685            | 21557 |     | 21558 |      |   |
| 104.012241535769 | 200   | 140 | 0     | Open | ; |
| 31686            | 18538 |     | 22626 |      |   |
| 104.037068816058 | 100   | 140 | 0     | Open | ; |
| 31687            | 23495 |     | 23496 |      |   |
| 104.396982969974 | 75    | 140 | 0     | Open | ; |
| 31688            | 18813 |     | 21366 |      |   |
| 104.447745602749 | 110   | 150 | 0     | Open | ; |
| 31689            | 20401 |     | 21056 |      |   |
| 104.474162788723 | 140   | 150 | 0     | Open | ; |
| 31690            | 23172 |     | 23173 |      |   |
| 104.731470880685 | 110   | 150 | 0     | Open | ; |
| 31691            | 20511 |     | 22673 |      |   |

|                     |       |     |       |      |   |
|---------------------|-------|-----|-------|------|---|
| 122.714548695166    | 125   | 140 | 0     | Open | ; |
| 31692               | 21457 |     | 21482 |      |   |
| 104.994020472218    | 110   | 150 | 0     | Open | ; |
| 31693               | 23170 |     | 23171 |      |   |
| 104.937248161447    | 110   | 150 | 0     | Open | ; |
| 31694               | 19652 |     | 20279 |      |   |
| 104.988636278304    | 125   | 150 | 0     | Open | ; |
| 31695               | 18653 |     | 18654 |      |   |
| 104.993775025066    | 75    | 140 | 0     | Open | ; |
| 31696               | 21115 |     | 21373 |      |   |
| 105.029561181872    | 110   | 150 | 0     | Open | ; |
| 31697               | 21227 |     | 19420 |      |   |
| 105.02956491371 110 |       | 150 | 0     | Open | ; |
| 31698               | 20643 |     | 20644 |      |   |
| 105.098319914303    | 100   | 140 | 0     | Open | ; |
| 31699               | 20764 |     | 20765 |      |   |
| 105.127708220881    | 110   | 150 | 0     | Open | ; |
| 31700               | 23176 |     | 23177 |      |   |
| 105.255913314957    | 110   | 150 | 0     | Open | ; |
| 31701               | 21914 |     | 21158 |      |   |
| 116.310842102404    | 160   | 150 | 0     | Open | ; |
| 31702               | 23644 |     | 19663 |      |   |
| 105.60902634255 110 |       | 150 | 0     | Open | ; |
| 31703               | 22642 |     | 22683 |      |   |
| 105.655233356156    | 110   | 150 | 0     | Open | ; |
| 31704               | 21458 |     | 21459 |      |   |
| 105.79034337041 110 |       | 150 | 0     | Open | ; |
| 31705               | 24288 |     | 24198 |      |   |
| 116.21667238672 110 |       | 150 | 0     | Open | ; |
| 31706               | 19553 |     | 22472 |      |   |
| 105.849134968066    | 250   | 100 | 0     | Open | ; |
| 31707               | 18747 |     | 20940 |      |   |
| 105.894835425077    | 110   | 150 | 0     | Open | ; |
| 31708               | 23362 |     | 23361 |      |   |
| 105.949912508701    | 125   | 140 | 0     | Open | ; |
| 31709               | 21096 |     | 21097 |      |   |
| 105.949270476846    | 160   | 150 | 0     | Open | ; |
| 31710               | 20020 |     | 21682 |      |   |
| 105.993985466523    | 250   | 140 | 0     | Open | ; |
| 31711               | 23545 |     | 21319 |      |   |
| 105.994024932385    | 150   | 140 | 0     | Open | ; |
| 31712               | 19396 |     | 19997 |      |   |
| 105.994030902697    | 300   | 140 | 0     | Open | ; |
| 31713               | 19730 |     | 24638 |      |   |
| 141.446670068652    | 110   | 150 | 0     | Open | ; |
| 31714               | 22904 |     | 22903 |      |   |
| 106.151154363506    | 75    | 140 | 0     | Open | ; |
| 31715               | 19045 |     | 19047 |      |   |
| 106.295781295338    | 75    | 140 | 0     | Open | ; |
| 31716               | 22755 |     | 19665 |      |   |



|                  |       |     |       |      |   |
|------------------|-------|-----|-------|------|---|
| 106.366059043992 | 100   | 100 | 0     | Open | ; |
| 31717            | 19397 |     | 19398 |      |   |
| 106.413099704342 | 110   | 150 | 0     | Open | ; |
| 31718            | 20741 |     | 23705 |      |   |
| 139.526816787844 | 110   | 150 | 0     | Open | ; |
| 31719            | 22168 |     | 23497 |      |   |
| 136.184976082852 | 125   | 150 | 0     | Open | ; |
| 31720            | 22213 |     | 24329 |      |   |
| 106.536984894294 | 100   | 140 | 0     | Open | ; |
| 31721            | 19049 |     | 20907 |      |   |
| 106.567001508082 | 75    | 140 | 0     | Open | ; |
| 31722            | 20851 |     | 20849 |      |   |
| 106.75366960953  | 110   | 150 | 0     | Open | ; |
| 31723            | 20334 |     | 20552 |      |   |
| 106.802916389473 | 110   | 150 | 0     | Open | ; |
| 31724            | 24008 |     | 22459 |      |   |
| 106.825074081183 | 75    | 140 | 0     | Open | ; |
| 31725            | 24009 |     | 22425 |      |   |
| 106.844169316533 | 75    | 140 | 0     | Open | ; |
| 31726            | 20675 |     | 20676 |      |   |
| 106.936093788732 | 110   | 150 | 0     | Open | ; |
| 31727            | 19271 |     | 21912 |      |   |
| 106.936709450731 | 110   | 150 | 0     | Open | ; |
| 31728            | 18596 |     | 18597 |      |   |
| 106.950744720484 | 140   | 150 | 0     | Open | ; |
| 31729            | 18539 |     | 20759 |      |   |
| 107.241920748062 | 100   | 140 | 0     | Open | ; |
| 31730            | 21947 |     | 20958 |      |   |
| 107.345808690011 | 75    | 150 | 0     | Open | ; |
| 31731            | 24024 |     | 24025 |      |   |
| 107.412551188558 | 75    | 150 | 0     | Open | ; |
| 31732            | 20886 |     | 20887 |      |   |
| 107.421242334623 | 75    | 150 | 0     | Open | ; |
| 31733            | 21065 |     | 21066 |      |   |
| 107.481228228664 | 100   | 140 | 0     | Open | ; |
| 31734            | 22868 |     | 18902 |      |   |
| 107.481778798571 | 75    | 150 | 0     | Open | ; |
| 31735            | 22122 |     | 22123 |      |   |
| 107.511821534563 | 150   | 140 | 0     | Open | ; |
| 31736            | 20604 |     | 22724 |      |   |
| 113.675489515148 | 125   | 150 | 0     | Open | ; |
| 31737            | 23971 |     | 23539 |      |   |
| 107.693632444846 | 100   | 140 | 0     | Open | ; |
| 31738            | 22944 |     | 24003 |      |   |
| 112.892584631385 | 250   | 150 | 0     | Open | ; |
| 31739            | 21779 |     | 21780 |      |   |
| 107.816015856502 | 110   | 150 | 0     | Open | ; |
| 31740            | 20880 |     | 21810 |      |   |
| 107.916905420193 | 250   | 100 | 0     | Open | ; |
| 31741            | 20058 |     | 24719 |      |   |

|                  |       |     |       |      |   |
|------------------|-------|-----|-------|------|---|
| 107.993785825257 | 75    | 150 | 0     | Open | ; |
| 31742            | 23968 |     | 24902 |      |   |
| 158.626453465178 | 110   | 150 | 0     | Open | ; |
| 31743            | 21223 |     | 23402 |      |   |
| 108.252222678891 | 100   | 140 | 0     | Open | ; |
| 31744            | 19721 |     | 19722 |      |   |
| 108.142304811513 | 75    | 140 | 0     | Open | ; |
| 31745            | 23431 |     | 21856 |      |   |
| 108.373261986862 | 100   | 100 | 0     | Open | ; |
| 31746            | 19556 |     | 19662 |      |   |
| 108.222944957866 | 75    | 140 | 0     | Open | ; |
| 31747            | 19123 |     | 19124 |      |   |
| 108.2926056508   | 75    | 140 | 0     | Open | ; |
| 31748            | 23070 |     | 23920 |      |   |
| 108.412040497628 | 150   | 140 | 0     | Open | ; |
| 31749            | 20844 |     | 18851 |      |   |
| 136.475677176419 | 100   | 140 | 0     | Open | ; |
| 31750            | 23229 |     | 21699 |      |   |
| 108.525354738477 | 110   | 150 | 0     | Open | ; |
| 31751            | 21126 |     | 18532 |      |   |
| 108.868018710861 | 250   | 140 | 0     | Open | ; |
| 31752            | 20297 |     | 20436 |      |   |
| 109.081656330742 | 200   | 140 | 0     | Open | ; |
| 31753            | 23694 |     | 22012 |      |   |
| 109.118302941464 | 75    | 150 | 0     | Open | ; |
| 31754            | 22963 |     | 18859 |      |   |
| 109.288958107198 | 110   | 150 | 0     | Open | ; |
| 31755            | 24356 |     | 24354 |      |   |
| 115.22371874971  | 160   | 150 | 0     | Open | ; |
| 31756            | 22680 |     | 22029 |      |   |
| 120.73824155984  | 125   | 150 | 0     | Open | ; |
| 31757            | 21856 |     | 23360 |      |   |
| 109.392039794949 | 100   | 140 | 0     | Open | ; |
| 31758            | 19904 |     | 21149 |      |   |
| 109.430676730807 | 140   | 150 | 0     | Open | ; |
| 31760            | 19487 |     | 20365 |      |   |
| 109.503403019334 | 150   | 140 | 0     | Open | ; |
| 31761            | 22427 |     | 24176 |      |   |
| 109.694100190988 | 110   | 150 | 0     | Open | ; |
| 31762            | 24700 |     | 24701 |      |   |
| 109.836580851376 | 110   | 150 | 0     | Open | ; |
| 31763            | 20922 |     | 20923 |      |   |
| 109.953315373684 | 250   | 100 | 0     | Open | ; |
| 31764            | 24436 |     | 24437 |      |   |
| 109.959499147056 | 110   | 150 | 0     | Open | ; |
| 31765            | 19674 |     | 22633 |      |   |
| 109.97346587391  | 110   | 150 | 0     | Open | ; |
| 31766            | 22366 |     | 23202 |      |   |
| 109.984941676414 | 110   | 150 | 0     | Open | ; |
| 31767            | 22299 |     | 22300 |      |   |

|                     |       |     |       |      |   |
|---------------------|-------|-----|-------|------|---|
| 110.00284412435 75  |       | 140 | 0     | Open | ; |
| 31768               | 24853 |     | 22296 |      |   |
| 110.050494449372    | 75    | 100 | 0     | Open | ; |
| 31769               | 20290 |     | 20291 |      |   |
| 110.075029454568    | 75    | 150 | 0     | Open | ; |
| 31770               | 20168 |     | 20169 |      |   |
| 110.089375260157    | 100   | 140 | 0     | Open | ; |
| 31771               | 23263 |     | 24298 |      |   |
| 110.25713561929 300 |       | 140 | 0     | Open | ; |
| 31772               | 24702 |     | 24703 |      |   |
| 110.319204277088    | 110   | 150 | 0     | Open | ; |
| 31773               | 23395 |     | 22958 |      |   |
| 110.38355405671 110 |       | 150 | 0     | Open | ; |
| 31774               | 23700 |     | 24297 |      |   |
| 113.684050781323    | 100   | 140 | 0     | Open | ; |
| 31775               | 20664 |     | 20918 |      |   |
| 110.84831990589 110 |       | 150 | 0     | Open | ; |
| 31776               | 18640 |     | 18768 |      |   |
| 110.601214156851    | 100   | 140 | 0     | Open | ; |
| 31777               | 24735 |     | 24767 |      |   |
| 110.747271649091    | 160   | 150 | 0     | Open | ; |
| 31778               | 20398 |     | 20025 |      |   |
| 110.747512872643    | 75    | 150 | 0     | Open | ; |
| 31779               | 21718 |     | 18552 |      |   |
| 110.848559798046    | 110   | 150 | 0     | Open | ; |
| 31780               | 24490 |     | 24492 |      |   |
| 159.456084987646    | 110   | 150 | 0     | Open | ; |
| 31781               | 24748 |     | 23566 |      |   |
| 111.104915459891    | 160   | 150 | 0     | Open | ; |
| 31782               | 20433 |     | 20273 |      |   |
| 111.19540134344 250 |       | 140 | 0     | Open | ; |
| 31783               | 24212 |     | 23228 |      |   |
| 111.454050498939    | 100   | 140 | 0     | Open | ; |
| 31784               | 21865 |     | 21866 |      |   |
| 111.593575675984    | 150   | 140 | 0     | Open | ; |
| 31785               | 19709 |     | 19710 |      |   |
| 111.641405335458    | 100   | 140 | 0     | Open | ; |
| 31786               | 24057 |     | 23433 |      |   |
| 111.686261697508    | 200   | 150 | 0     | Open | ; |
| 31787               | 22861 |     | 21948 |      |   |
| 107.834849681547    | 450   | 100 | 0     | Open | ; |
| 31788               | 22675 |     | 18517 |      |   |
| 111.99130569002 110 |       | 150 | 0     | Open | ; |
| 31789               | 19041 |     | 19043 |      |   |
| 111.77265204761 75  |       | 140 | 0     | Open | ; |
| 31790               | 22296 |     | 24856 |      |   |
| 111.787488880171    | 75    | 100 | 0     | Open | ; |
| 31791               | 22435 |     | 22453 |      |   |
| 111.823808123124    | 110   | 150 | 0     | Open | ; |
| 31792               | 22965 |     | 21036 |      |   |

|                     |       |     |       |      |   |
|---------------------|-------|-----|-------|------|---|
| 47.4972238185166    | 75    | 150 | 0     | Open | ; |
| 31793               | 20003 |     | 20001 |      |   |
| 47.498225151709 150 |       | 140 | 0     | Open | ; |
| 31794               | 20356 |     | 20355 |      |   |
| 47.5429214675369    | 110   | 150 | 0     | Open | ; |
| 31795               | 20824 |     | 21880 |      |   |
| 47.5521129949252    | 110   | 150 | 0     | Open | ; |
| 31796               | 21705 |     | 21706 |      |   |
| 47.5524324069736    | 75    | 140 | 0     | Open | ; |
| 31797               | 21272 |     | 23413 |      |   |
| 47.565502534379 75  |       | 140 | 0     | Open | ; |
| 31798               | 22021 |     | 22022 |      |   |
| 47.590762478155 125 |       | 150 | 0     | Open | ; |
| 31799               | 20775 |     | 22386 |      |   |
| 47.5962246962732    | 110   | 150 | 0     | Open | ; |
| 31800               | 23806 |     | 19905 |      |   |
| 47.602148079422 100 |       | 140 | 0     | Open | ; |
| 31801               | 19308 |     | 19309 |      |   |
| 47.6040139307512    | 100   | 140 | 0     | Open | ; |
| 31802               | 25035 |     | 20583 |      |   |
| 47.6570286483977    | 75    | 150 | 0     | Open | ; |
| 31803               | 19939 |     | 20404 |      |   |
| 47.6603719259291    | 110   | 150 | 0     | Open | ; |
| 31804               | 20410 |     | 20411 |      |   |
| 47.663172604092 110 |       | 150 | 0     | Open | ; |
| 31805               | 24898 |     | 24899 |      |   |
| 47.6674462891314    | 110   | 150 | 0     | Open | ; |
| 31806               | 23348 |     | 21676 |      |   |
| 51.5489149393054    | 110   | 150 | 0     | Open | ; |
| 31807               | 23157 |     | 23154 |      |   |
| 47.7427799197579    | 110   | 150 | 0     | Open | ; |
| 31808               | 23005 |     | 23006 |      |   |
| 47.7586724313061    | 75    | 150 | 0     | Open | ; |
| 31809               | 19372 |     | 18847 |      |   |
| 47.7972789353339    | 100   | 140 | 0     | Open | ; |
| 31810               | 20828 |     | 19135 |      |   |
| 47.8175897067392    | 75    | 140 | 0     | Open | ; |
| 31811               | 19046 |     | 19722 |      |   |
| 49.859985727098 100 |       | 140 | 0     | Open | ; |
| 31812               | 21544 |     | 18609 |      |   |
| 47.8417779845534    | 160   | 150 | 0     | Open | ; |
| 31813               | 19373 |     | 18922 |      |   |
| 47.8589901633874    | 100   | 140 | 0     | Open | ; |
| 31814               | 22917 |     | 19040 |      |   |
| 47.8798109911488    | 100   | 140 | 0     | Open | ; |
| 31815               | 24757 |     | 24780 |      |   |
| 67.8654522858157    | 160   | 150 | 0     | Open | ; |
| 31816               | 18896 |     | 18898 |      |   |
| 48.1959124981358    | 160   | 150 | 0     | Open | ; |
| 31817               | 20345 |     | 20343 |      |   |

|                     |       |     |       |      |   |
|---------------------|-------|-----|-------|------|---|
| 47.9075079938648    | 110   | 150 | 0     | Open | ; |
| 31818               | 20123 |     | 22695 |      |   |
| 47.9210556436659    | 75    | 140 | 0     | Open | ; |
| 31819               | 20040 |     | 20400 |      |   |
| 47.9313418145219    | 160   | 150 | 0     | Open | ; |
| 31820               | 23890 |     | 24185 |      |   |
| 47.9635937538666    | 100   | 140 | 0     | Open | ; |
| 31821               | 19646 |     | 20438 |      |   |
| 47.9972889246479    | 100   | 140 | 0     | Open | ; |
| 31822               | 18847 |     | 18848 |      |   |
| 47.984375414222 100 |       | 140 | 0     | Open | ; |
| 31823               | 22148 |     | 22149 |      |   |
| 47.9852393811198    | 75    | 140 | 0     | Open | ; |
| 31824               | 19387 |     | 19388 |      |   |
| 47.9904860327738    | 75    | 140 | 0     | Open | ; |
| 31825               | 19409 |     | 19410 |      |   |
| 47.9920482163442    | 75    | 140 | 0     | Open | ; |
| 31826               | 23511 |     | 23512 |      |   |
| 47.9920924789405    | 75    | 140 | 0     | Open | ; |
| 31827               | 19431 |     | 19432 |      |   |
| 47.9947864691859    | 75    | 150 | 0     | Open | ; |
| 31828               | 20700 |     | 22463 |      |   |
| 47.9948556741606    | 75    | 150 | 0     | Open | ; |
| 31829               | 24073 |     | 21924 |      |   |
| 47.9988146656219    | 100   | 140 | 0     | Open | ; |
| 31830               | 18744 |     | 21426 |      |   |
| 47.9953817031691    | 160   | 150 | 0     | Open | ; |
| 31831               | 18575 |     | 18576 |      |   |
| 47.9956625800232    | 75    | 140 | 0     | Open | ; |
| 31832               | 24317 |     | 18673 |      |   |
| 47.9971554071918    | 75    | 140 | 0     | Open | ; |
| 31833               | 21769 |     | 21770 |      |   |
| 47.9960171726397    | 100   | 140 | 0     | Open | ; |
| 31834               | 18923 |     | 19339 |      |   |
| 47.9973068895916    | 100   | 140 | 0     | Open | ; |
| 31835               | 23280 |     | 23281 |      |   |
| 47.9966279724611    | 75    | 140 | 0     | Open | ; |
| 31836               | 19063 |     | 19065 |      |   |
| 47.9969215291148    | 75    | 150 | 0     | Open | ; |
| 31837               | 21450 |     | 21451 |      |   |
| 47.9970656087466    | 75    | 140 | 0     | Open | ; |
| 31838               | 19262 |     | 19263 |      |   |
| 47.9972055192514    | 110   | 150 | 0     | Open | ; |
| 31839               | 19129 |     | 19130 |      |   |
| 47.9972108090178    | 75    | 140 | 0     | Open | ; |
| 31840               | 18922 |     | 18923 |      |   |
| 47.9972295681396    | 100   | 140 | 0     | Open | ; |
| 31841               | 21266 |     | 21267 |      |   |
| 47.9972397366707    | 110   | 150 | 0     | Open | ; |
| 31842               | 21006 |     | 21007 |      |   |

|                     |       |     |       |      |   |
|---------------------|-------|-----|-------|------|---|
| 47.9972439133828    | 100   | 140 | 0     | Open | ; |
| 31843               | 22411 |     | 22412 |      |   |
| 47.9972501249477    | 75    | 150 | 0     | Open | ; |
| 31844               | 18764 |     | 18765 |      |   |
| 47.9972801633872    | 125   | 150 | 0     | Open | ; |
| 31845               | 21491 |     | 21492 |      |   |
| 47.9973103799628    | 100   | 140 | 0     | Open | ; |
| 31846               | 23386 |     | 23387 |      |   |
| 47.9973175878805    | 150   | 140 | 0     | Open | ; |
| 31847               | 18746 |     | 18744 |      |   |
| 47.9973446688629    | 160   | 150 | 0     | Open | ; |
| 31848               | 22955 |     | 23768 |      |   |
| 47.9973606245398    | 110   | 150 | 0     | Open | ; |
| 31849               | 23572 |     | 22515 |      |   |
| 47.9973616846096    | 100   | 140 | 0     | Open | ; |
| 31850               | 20962 |     | 20581 |      |   |
| 47.9990525995034    | 140   | 150 | 0     | Open | ; |
| 31851               | 19526 |     | 22998 |      |   |
| 47.999871039846 75  |       | 140 | 0     | Open | ; |
| 31852               | 20953 |     | 22265 |      |   |
| 47.999958576034 75  |       | 150 | 0     | Open | ; |
| 31853               | 20955 |     | 22389 |      |   |
| 48.0000558130786    | 75    | 150 | 0     | Open | ; |
| 31854               | 22274 |     | 23304 |      |   |
| 48.0054544137414    | 75    | 140 | 0     | Open | ; |
| 31855               | 18581 |     | 23696 |      |   |
| 48.0094108145194    | 160   | 150 | 0     | Open | ; |
| 31856               | 22276 |     | 23303 |      |   |
| 48.0102034483237    | 75    | 140 | 0     | Open | ; |
| 31857               | 20407 |     | 20773 |      |   |
| 48.0523693594282    | 110   | 150 | 0     | Open | ; |
| 31858               | 19528 |     | 23114 |      |   |
| 48.0653762599074    | 110   | 150 | 0     | Open | ; |
| 31859               | 22117 |     | 22118 |      |   |
| 48.091512097337 100 |       | 140 | 0     | Open | ; |
| 31860               | 22394 |     | 19891 |      |   |
| 48.1096735298316    | 110   | 150 | 0     | Open | ; |
| 31861               | 20859 |     | 22654 |      |   |
| 48.1206935476837    | 75    | 140 | 0     | Open | ; |
| 31862               | 20028 |     | 20827 |      |   |
| 48.1341562329173    | 100   | 140 | 0     | Open | ; |
| 31863               | 20506 |     | 22909 |      |   |
| 48.154815751762 350 |       | 130 | 0     | Open | ; |
| 31864               | 23188 |     | 24459 |      |   |
| 48.5801886920257    | 110   | 150 | 0     | Open | ; |
| 31865               | 21982 |     | 21983 |      |   |
| 48.1704221243654    | 160   | 150 | 0     | Open | ; |
| 31866               | 24884 |     | 24877 |      |   |
| 48.223656969804 110 |       | 150 | 0     | Open | ; |
| 31867               | 19511 |     | 19512 |      |   |

|                  |       |     |       |      |   |
|------------------|-------|-----|-------|------|---|
| 48.2242600407164 | 100   | 140 | 0     | Open | ; |
| 31868            | 18823 |     | 22569 |      |   |
| 48.2351548723174 | 75    | 140 | 0     | Open | ; |
| 31869            | 18934 |     | 18935 |      |   |
| 48.2376087624974 | 110   | 150 | 0     | Open | ; |
| 31870            | 24664 |     | 24665 |      |   |
| 48.2668234547687 | 200   | 150 | 0     | Open | ; |
| 31871            | 22395 |     | 22396 |      |   |
| 48.3415402966185 | 110   | 150 | 0     | Open | ; |
| 31872            | 22349 |     | 22350 |      |   |
| 48.3694527383563 | 110   | 150 | 0     | Open | ; |
| 31873            | 22351 |     | 22352 |      |   |
| 48.3818509243404 | 110   | 150 | 0     | Open | ; |
| 31874            | 20863 |     | 23792 |      |   |
| 48.3950195793946 | 75    | 140 | 0     | Open | ; |
| 31875            | 18754 |     | 18755 |      |   |
| 48.4171060729665 | 100   | 140 | 0     | Open | ; |
| 31876            | 21854 |     | 21855 |      |   |
| 48.4201316748886 | 125   | 140 | 0     | Open | ; |
| 31877            | 21035 |     | 22346 |      |   |
| 48.4213579933523 | 110   | 150 | 0     | Open | ; |
| 31878            | 21382 |     | 18773 |      |   |
| 48.4475861887693 | 100   | 140 | 0     | Open | ; |
| 31879            | 19028 |     | 24962 |      |   |
| 48.4728072377009 | 75    | 140 | 0     | Open | ; |
| 31880            | 19132 |     | 20038 |      |   |
| 48.4943506671648 | 75    | 140 | 0     | Open | ; |
| 31881            | 20122 |     | 20366 |      |   |
| 48.5139533709228 | 100   | 140 | 0     | Open | ; |
| 31882            | 21838 |     | 19443 |      |   |
| 48.5143803073094 | 100   | 140 | 0     | Open | ; |
| 31883            | 22672 |     | 19042 |      |   |
| 43.3580902584762 | 100   | 140 | 0     | Open | ; |
| 31884            | 22399 |     | 19885 |      |   |
| 48.5549072373558 | 110   | 150 | 0     | Open | ; |
| 31885            | 19175 |     | 19176 |      |   |
| 48.6677641381908 | 75    | 140 | 0     | Open | ; |
| 31886            | 19223 |     | 21674 |      |   |
| 50.7619340740189 | 110   | 150 | 0     | Open | ; |
| 31887            | 20795 |     | 22358 |      |   |
| 48.7453220637229 | 110   | 150 | 0     | Open | ; |
| 31888            | 25017 |     | 22718 |      |   |
| 49.8370557311704 | 200   | 140 | 0     | Open | ; |
| 31889            | 23271 |     | 23272 |      |   |
| 48.8043916784828 | 110   | 150 | 0     | Open | ; |
| 31890            | 23615 |     | 23616 |      |   |
| 48.8326347661612 | 200   | 150 | 0     | Open | ; |
| 31891            | 24619 |     | 24612 |      |   |
| 48.8487638282145 | 110   | 150 | 0     | Open | ; |
| 31892            | 20613 |     | 23665 |      |   |

|                  |       |     |       |      |   |
|------------------|-------|-----|-------|------|---|
| 48.8596560202748 | 110   | 150 | 0     | Open | ; |
| 31893            | 21569 |     | 21570 |      |   |
| 48.8927651552811 | 75    | 140 | 0     | Open | ; |
| 31894            | 23645 |     | 23005 |      |   |
| 48.9039993806562 | 75    | 150 | 0     | Open | ; |
| 31895            | 24048 |     | 20410 |      |   |
| 48.9042261170336 | 110   | 150 | 0     | Open | ; |
| 31897            | 18901 |     | 18903 |      |   |
| 48.9672318753696 | 110   | 150 | 0     | Open | ; |
| 31898            | 20925 |     | 19227 |      |   |
| 48.9836393303506 | 110   | 150 | 0     | Open | ; |
| 31899            | 23571 |     | 23572 |      |   |
| 48.9904427874799 | 100   | 140 | 0     | Open | ; |
| 31900            | 21684 |     | 21491 |      |   |
| 48.9972416548428 | 100   | 140 | 0     | Open | ; |
| 31901            | 19931 |     | 22039 |      |   |
| 48.9957948933343 | 110   | 150 | 0     | Open | ; |
| 31902            | 18498 |     | 21389 |      |   |
| 48.9971267407005 | 75    | 150 | 0     | Open | ; |
| 31903            | 24155 |     | 19859 |      |   |
| 48.9971398026359 | 100   | 140 | 0     | Open | ; |
| 31904            | 21063 |     | 21064 |      |   |
| 48.9971528161167 | 110   | 150 | 0     | Open | ; |
| 31905            | 19370 |     | 21684 |      |   |
| 48.9971987918712 | 100   | 140 | 0     | Open | ; |
| 31906            | 19249 |     | 21576 |      |   |
| 48.9972820650463 | 110   | 150 | 0     | Open | ; |
| 31907            | 21561 |     | 23784 |      |   |
| 48.9973178938766 | 125   | 140 | 0     | Open | ; |
| 31908            | 23394 |     | 23391 |      |   |
| 48.9975224462029 | 75    | 140 | 0     | Open | ; |
| 31909            | 19221 |     | 21673 |      |   |
| 48.9975302349002 | 110   | 150 | 0     | Open | ; |
| 31910            | 19126 |     | 19138 |      |   |
| 48.9977238438617 | 75    | 140 | 0     | Open | ; |
| 31911            | 23664 |     | 20613 |      |   |
| 49.0134019438328 | 110   | 150 | 0     | Open | ; |
| 31912            | 18553 |     | 18901 |      |   |
| 49.0272547292885 | 110   | 150 | 0     | Open | ; |
| 31913            | 24553 |     | 24554 |      |   |
| 49.0594632441927 | 75    | 150 | 0     | Open | ; |
| 31914            | 24720 |     | 24721 |      |   |
| 49.0641752858893 | 110   | 150 | 0     | Open | ; |
| 31915            | 20154 |     | 20155 |      |   |
| 49.0964150487074 | 75    | 140 | 0     | Open | ; |
| 31916            | 18848 |     | 21539 |      |   |
| 49.1585574106853 | 100   | 140 | 0     | Open | ; |
| 31917            | 23669 |     | 22983 |      |   |
| 49.3013608617401 | 100   | 140 | 0     | Open | ; |
| 31918            | 21254 |     | 21773 |      |   |



|                     |       |     |       |      |   |
|---------------------|-------|-----|-------|------|---|
| 49.3236688875945    | 110   | 150 | 0     | Open | ; |
| 31919               | 23909 |     | 23823 |      |   |
| 49.3692562999059    | 100   | 136 | 0     | Open | ; |
| 31920               | 23415 |     | 23416 |      |   |
| 49.3789880862772    | 75    | 150 | 0     | Open | ; |
| 31921               | 20124 |     | 19906 |      |   |
| 49.3987048205009    | 75    | 140 | 0     | Open | ; |
| 31922               | 24474 |     | 25674 |      |   |
| 66.3827187679711    | 110   | 150 | 0     | Open | ; |
| 31923               | 22924 |     | 22925 |      |   |
| 49.4371624614469    | 75    | 140 | 0     | Open | ; |
| 31924               | 22912 |     | 23987 |      |   |
| 49.4407853706359    | 100   | 140 | 0     | Open | ; |
| 31925               | 18483 |     | 19966 |      |   |
| 49.4594342926971    | 75    | 150 | 0     | Open | ; |
| 31926               | 23059 |     | 24238 |      |   |
| 49.4730698419433    | 100   | 136 | 0     | Open | ; |
| 31927               | 24551 |     | 24552 |      |   |
| 49.493638572111 75  |       | 150 | 0     | Open | ; |
| 31928               | 19349 |     | 19347 |      |   |
| 49.514801886106 110 |       | 150 | 0     | Open | ; |
| 31929               | 23520 |     | 23546 |      |   |
| 49.5711733262713    | 110   | 150 | 0     | Open | ; |
| 31930               | 19154 |     | 20672 |      |   |
| 49.5998360332457    | 150   | 140 | 0     | Open | ; |
| 31931               | 24475 |     | 24477 |      |   |
| 49.6257298628075    | 110   | 150 | 0     | Open | ; |
| 31932               | 19537 |     | 22020 |      |   |
| 49.6328847981703    | 125   | 140 | 0     | Open | ; |
| 31933               | 18850 |     | 24254 |      |   |
| 49.6355770960342    | 100   | 136 | 0     | Open | ; |
| 31934               | 19738 |     | 19212 |      |   |
| 49.6705879040909    | 75    | 150 | 0     | Open | ; |
| 31935               | 23327 |     | 23328 |      |   |
| 49.6727038033514    | 75    | 140 | 0     | Open | ; |
| 31936               | 20306 |     | 20415 |      |   |
| 49.7024086715365    | 100   | 140 | 0     | Open | ; |
| 31937               | 23155 |     | 23154 |      |   |
| 49.7336294276046    | 110   | 150 | 0     | Open | ; |
| 31938               | 23561 |     | 19952 |      |   |
| 49.78782253072 100  |       | 140 | 0     | Open | ; |
| 31939               | 22648 |     | 22997 |      |   |
| 49.8081169181092    | 75    | 140 | 0     | Open | ; |
| 31940               | 18552 |     | 23274 |      |   |
| 49.8286202369813    | 110   | 150 | 0     | Open | ; |
| 31941               | 20665 |     | 24561 |      |   |
| 49.84459798292 110  |       | 150 | 0     | Open | ; |
| 31942               | 19292 |     | 20067 |      |   |
| 49.8565229738832    | 75    | 140 | 0     | Open | ; |
| 31943               | 21468 |     | 21330 |      |   |

|                     |       |     |       |      |   |
|---------------------|-------|-----|-------|------|---|
| 49.8674928197502    | 75    | 140 | 0     | Open | ; |
| 31944               | 19309 |     | 19506 |      |   |
| 49.9056073018282    | 100   | 140 | 0     | Open | ; |
| 31945               | 19349 |     | 19350 |      |   |
| 49.9152502952899    | 110   | 150 | 0     | Open | ; |
| 31946               | 21722 |     | 21723 |      |   |
| 49.9212840954379    | 100   | 130 | 0     | Open | ; |
| 31947               | 21748 |     | 19775 |      |   |
| 49.9972289742232    | 100   | 140 | 0     | Open | ; |
| 31948               | 20151 |     | 19126 |      |   |
| 65.9963296236318    | 75    | 140 | 0     | Open | ; |
| 31949               | 21849 |     | 20312 |      |   |
| 49.9682114200074    | 110   | 150 | 0     | Open | ; |
| 31950               | 18786 |     | 24117 |      |   |
| 49.9859597794054    | 75    | 140 | 0     | Open | ; |
| 31951               | 18467 |     | 18468 |      |   |
| 49.9913605569418    | 75    | 140 | 0     | Open | ; |
| 31952               | 18469 |     | 18470 |      |   |
| 49.9913628460362    | 75    | 140 | 0     | Open | ; |
| 31953               | 19146 |     | 19147 |      |   |
| 49.9913628460391    | 75    | 140 | 0     | Open | ; |
| 31954               | 18760 |     | 18761 |      |   |
| 49.9980212640006    | 125   | 150 | 0     | Open | ; |
| 31955               | 21870 |     | 21871 |      |   |
| 49.997141930207 110 |       | 150 | 0     | Open | ; |
| 31956               | 19118 |     | 22650 |      |   |
| 49.9965379893676    | 125   | 150 | 0     | Open | ; |
| 31957               | 21064 |     | 19413 |      |   |
| 49.9969012385702    | 110   | 150 | 0     | Open | ; |
| 31958               | 19862 |     | 19863 |      |   |
| 49.9969867833567    | 75    | 150 | 0     | Open | ; |
| 31959               | 21582 |     | 18840 |      |   |
| 49.9970037631378    | 110   | 150 | 0     | Open | ; |
| 31960               | 23074 |     | 23075 |      |   |
| 49.9970377216497    | 75    | 140 | 0     | Open | ; |
| 31961               | 20650 |     | 20651 |      |   |
| 49.997037722418 75  |       | 140 | 0     | Open | ; |
| 31962               | 22115 |     | 22116 |      |   |
| 49.997037722418 75  |       | 140 | 0     | Open | ; |
| 31963               | 19152 |     | 19153 |      |   |
| 49.9970377224532    | 75    | 140 | 0     | Open | ; |
| 31964               | 20510 |     | 22026 |      |   |
| 49.9971979295542    | 110   | 150 | 0     | Open | ; |
| 31965               | 23699 |     | 20003 |      |   |
| 49.9971481110393    | 150   | 140 | 0     | Open | ; |
| 31966               | 22927 |     | 21912 |      |   |
| 49.9971738666485    | 110   | 150 | 0     | Open | ; |
| 31967               | 20995 |     | 20996 |      |   |
| 49.9971782395064    | 75    | 140 | 0     | Open | ; |
| 31968               | 21839 |     | 21216 |      |   |

|                  |       |     |       |      |   |
|------------------|-------|-----|-------|------|---|
| 49.9972105395344 | 110   | 150 | 0     | Open | ; |
| 31969            | 23937 |     | 23863 |      |   |
| 49.9972401669494 | 75    | 140 | 0     | Open | ; |
| 31970            | 18815 |     | 18816 |      |   |
| 49.9972490969852 | 75    | 150 | 0     | Open | ; |
| 31971            | 21620 |     | 21621 |      |   |
| 49.9974533169295 | 100   | 140 | 0     | Open | ; |
| 31972            | 21719 |     | 21720 |      |   |
| 49.9976732001391 | 125   | 140 | 0     | Open | ; |
| 31973            | 21104 |     | 21105 |      |   |
| 49.9978617981839 | 75    | 140 | 0     | Open | ; |
| 31974            | 23992 |     | 20361 |      |   |
| 49.9982224700438 | 75    | 140 | 0     | Open | ; |
| 31975            | 23489 |     | 23533 |      |   |
| 49.9985004791719 | 100   | 140 | 0     | Open | ; |
| 31976            | 22039 |     | 21946 |      |   |
| 49.9985475682871 | 110   | 150 | 0     | Open | ; |
| 31977            | 21785 |     | 18984 |      |   |
| 49.9993728306211 | 110   | 150 | 0     | Open | ; |
| 31978            | 20954 |     | 20952 |      |   |
| 49.9999686960559 | 110   | 150 | 0     | Open | ; |
| 31979            | 21196 |     | 21197 |      |   |
| 50.0004252971578 | 75    | 140 | 0     | Open | ; |
| 31980            | 18817 |     | 18818 |      |   |
| 50.0017303409071 | 75    | 150 | 0     | Open | ; |
| 31981            | 24465 |     | 24549 |      |   |
| 50.0054120384168 | 75    | 150 | 0     | Open | ; |
| 31982            | 23343 |     | 23345 |      |   |
| 50.0083643003696 | 110   | 150 | 0     | Open | ; |
| 31983            | 21395 |     | 21396 |      |   |
| 50.0117503097654 | 100   | 140 | 0     | Open | ; |
| 31984            | 24748 |     | 24749 |      |   |
| 50.0601426164037 | 160   | 150 | 0     | Open | ; |
| 31985            | 23328 |     | 21645 |      |   |
| 50.0885166803877 | 75    | 140 | 0     | Open | ; |
| 31986            | 20207 |     | 23949 |      |   |
| 50.0957455035896 | 110   | 150 | 0     | Open | ; |
| 31987            | 22896 |     | 22628 |      |   |
| 50.1842952109775 | 160   | 150 | 0     | Open | ; |
| 31988            | 19912 |     | 22179 |      |   |
| 50.1991171674989 | 150   | 140 | 0     | Open | ; |
| 31989            | 21922 |     | 21553 |      |   |
| 50.2205479828298 | 110   | 150 | 0     | Open | ; |
| 31990            | 19953 |     | 23831 |      |   |
| 50.29213677112   | 100   | 140 | 0     | Open | ; |
| 31991            | 23460 |     | 23461 |      |   |
| 50.3068184738935 | 100   | 140 | 0     | Open | ; |
| 31992            | 21505 |     | 21591 |      |   |
| 50.3171441570641 | 110   | 150 | 0     | Open | ; |
| 31993            | 23669 |     | 24067 |      |   |

|                  |       |     |       |      |   |
|------------------|-------|-----|-------|------|---|
| 50.3316647277455 | 100   | 140 | 0     | Open | ; |
| 31994            | 24901 |     | 25706 |      |   |
| 50.3509048904463 | 75    | 100 | 0     | Open | ; |
| 31995            | 22486 |     | 22487 |      |   |
| 50.3558544640785 | 110   | 150 | 0     | Open | ; |
| 31996            | 19347 |     | 19348 |      |   |
| 50.3717870615835 | 110   | 150 | 0     | Open | ; |
| 31997            | 23705 |     | 23706 |      |   |
| 50.3807238680339 | 125   | 150 | 0     | Open | ; |
| 31998            | 22391 |     | 23209 |      |   |
| 50.4000243926588 | 110   | 150 | 0     | Open | ; |
| 31999            | 24175 |     | 24239 |      |   |
| 50.4939297875844 | 100   | 136 | 0     | Open | ; |
| 32000            | 23129 |     | 23130 |      |   |
| 50.5203793811148 | 75    | 150 | 0     | Open | ; |
| 32001            | 19992 |     | 19993 |      |   |
| 50.5808116575547 | 75    | 150 | 0     | Open | ; |
| 32002            | 20056 |     | 22238 |      |   |
| 50.5791041967164 | 110   | 150 | 0     | Open | ; |
| 32003            | 19739 |     | 21542 |      |   |
| 50.580416909141  | 110   | 150 | 0     | Open | ; |
| 32004            | 22984 |     | 21397 |      |   |
| 50.586859080997  | 100   | 140 | 0     | Open | ; |
| 32005            | 19764 |     | 23142 |      |   |
| 50.6186510259465 | 200   | 150 | 0     | Open | ; |
| 32006            | 21427 |     | 21428 |      |   |
| 50.6252644189031 | 110   | 150 | 0     | Open | ; |
| 32007            | 21891 |     | 21892 |      |   |
| 50.673784061459  | 125   | 140 | 0     | Open | ; |
| 32008            | 21943 |     | 21944 |      |   |
| 50.6844614290454 | 75    | 150 | 0     | Open | ; |
| 32009            | 19218 |     | 19220 |      |   |
| 50.6989250755538 | 75    | 150 | 0     | Open | ; |
| 32011            | 22638 |     | 21543 |      |   |
| 50.7484414239794 | 110   | 150 | 0     | Open | ; |
| 32012            | 18909 |     | 18910 |      |   |
| 50.7801949475678 | 75    | 150 | 0     | Open | ; |
| 32013            | 21021 |     | 22459 |      |   |
| 50.8089800345621 | 75    | 140 | 0     | Open | ; |
| 32014            | 19534 |     | 20609 |      |   |
| 53.2053963375829 | 110   | 150 | 0     | Open | ; |
| 32015            | 19077 |     | 19078 |      |   |
| 50.8553278527137 | 125   | 150 | 0     | Open | ; |
| 32016            | 21892 |     | 19127 |      |   |
| 50.9123272330275 | 125   | 140 | 0     | Open | ; |
| 32017            | 21591 |     | 21592 |      |   |
| 50.9457308272429 | 110   | 150 | 0     | Open | ; |
| 32018            | 20309 |     | 20310 |      |   |
| 50.9565106274618 | 75    | 140 | 0     | Open | ; |
| 32019            | 24115 |     | 24172 |      |   |

|                  |       |     |       |      |   |
|------------------|-------|-----|-------|------|---|
| 165.989993574326 | 75    | 140 | 0     | Open | ; |
| 32020            | 22238 |     | 23287 |      |   |
| 50.9725551018934 | 110   | 150 | 0     | Open | ; |
| 32021            | 23987 |     | 20731 |      |   |
| 50.9835606774095 | 100   | 140 | 0     | Open | ; |
| 32022            | 21613 |     | 22809 |      |   |
| 50.9894790317444 | 150   | 140 | 0     | Open | ; |
| 32023            | 18986 |     | 23497 |      |   |
| 50.9970806495584 | 125   | 150 | 0     | Open | ; |
| 32024            | 23318 |     | 23319 |      |   |
| 50.9969239723886 | 75    | 140 | 0     | Open | ; |
| 32025            | 20726 |     | 23721 |      |   |
| 50.9969754791105 | 75    | 150 | 0     | Open | ; |
| 32026            | 18477 |     | 23441 |      |   |
| 50.9970599048053 | 100   | 140 | 0     | Open | ; |
| 32027            | 21528 |     | 23096 |      |   |
| 50.9971285713842 | 140   | 150 | 0     | Open | ; |
| 32028            | 21528 |     | 21529 |      |   |
| 50.9971285710796 | 140   | 150 | 0     | Open | ; |
| 32029            | 20207 |     | 20208 |      |   |
| 50.9971601212284 | 110   | 150 | 0     | Open | ; |
| 32030            | 23029 |     | 24074 |      |   |
| 44.4999757119655 | 125   | 140 | 0     | Open | ; |
| 32031            | 22272 |     | 23044 |      |   |
| 50.9972525737067 | 75    | 140 | 0     | Open | ; |
| 32032            | 21570 |     | 19794 |      |   |
| 51.0000275495961 | 75    | 140 | 0     | Open | ; |
| 32033            | 24837 |     | 24569 |      |   |
| 51.0580373972053 | 140   | 150 | 0     | Open | ; |
| 32034            | 20151 |     | 20152 |      |   |
| 51.0733522804265 | 75    | 140 | 0     | Open | ; |
| 32035            | 21010 |     | 21011 |      |   |
| 51.1062963630866 | 100   | 140 | 0     | Open | ; |
| 32036            | 24250 |     | 20432 |      |   |
| 51.1228294776751 | 100   | 140 | 0     | Open | ; |
| 32037            | 18858 |     | 23842 |      |   |
| 51.1336225439669 | 150   | 140 | 0     | Open | ; |
| 32038            | 18778 |     | 18779 |      |   |
| 51.1604618035414 | 110   | 150 | 0     | Open | ; |
| 32039            | 20031 |     | 20034 |      |   |
| 51.1778312037689 | 100   | 140 | 0     | Open | ; |
| 32040            | 19914 |     | 20194 |      |   |
| 51.2294330128511 | 100   | 140 | 0     | Open | ; |
| 32041            | 24935 |     | 24859 |      |   |
| 52.9413441276018 | 110   | 150 | 0     | Open | ; |
| 32042            | 20193 |     | 23329 |      |   |
| 51.2555576855075 | 100   | 140 | 0     | Open | ; |
| 32043            | 21050 |     | 21868 |      |   |
| 51.3053138115938 | 100   | 140 | 0     | Open | ; |
| 32044            | 24753 |     | 24754 |      |   |

|                  |       |     |       |      |   |
|------------------|-------|-----|-------|------|---|
| 51.3179853809311 | 110   | 150 | 0     | Open | ; |
| 32045            | 18699 |     | 19770 |      |   |
| 51.3971229454206 | 100   | 140 | 0     | Open | ; |
| 32046            | 19273 |     | 19271 |      |   |
| 51.3973921867502 | 110   | 150 | 0     | Open | ; |
| 32047            | 23164 |     | 23165 |      |   |
| 51.444594635317  | 110   | 150 | 0     | Open | ; |
| 32048            | 22546 |     | 18624 |      |   |
| 51.4450078806219 | 100   | 140 | 0     | Open | ; |
| 32049            | 23486 |     | 20685 |      |   |
| 51.476558513245  | 75    | 140 | 0     | Open | ; |
| 32050            | 22663 |     | 21794 |      |   |
| 66.9376890217147 | 75    | 140 | 0     | Open | ; |
| 32051            | 24653 |     | 21591 |      |   |
| 51.5756514383374 | 110   | 150 | 0     | Open | ; |
| 32052            | 24647 |     | 24648 |      |   |
| 51.6132246493962 | 160   | 150 | 0     | Open | ; |
| 32053            | 20278 |     | 23523 |      |   |
| 51.6319641818064 | 100   | 140 | 0     | Open | ; |
| 32054            | 21588 |     | 20412 |      |   |
| 51.6563822379711 | 110   | 150 | 0     | Open | ; |
| 32055            | 22497 |     | 22313 |      |   |
| 51.678518255389  | 110   | 150 | 0     | Open | ; |
| 32056            | 23330 |     | 20194 |      |   |
| 51.6971747010783 | 100   | 140 | 0     | Open | ; |
| 32057            | 20227 |     | 22899 |      |   |
| 51.6990171583882 | 125   | 140 | 0     | Open | ; |
| 32058            | 22871 |     | 20483 |      |   |
| 51.7400988541072 | 160   | 150 | 0     | Open | ; |
| 32059            | 21189 |     | 21514 |      |   |
| 51.7466785760273 | 110   | 150 | 0     | Open | ; |
| 32060            | 21414 |     | 23482 |      |   |
| 51.8185099916648 | 100   | 140 | 0     | Open | ; |
| 32061            | 21479 |     | 21480 |      |   |
| 52.6399273264843 | 110   | 150 | 0     | Open | ; |
| 32062            | 23342 |     | 21382 |      |   |
| 51.8756749002462 | 100   | 140 | 0     | Open | ; |
| 32063            | 19090 |     | 19091 |      |   |
| 51.9029060190386 | 75    | 150 | 0     | Open | ; |
| 32064            | 19225 |     | 19226 |      |   |
| 51.9102314908329 | 110   | 150 | 0     | Open | ; |
| 32065            | 21492 |     | 21573 |      |   |
| 51.9636023053349 | 100   | 140 | 0     | Open | ; |
| 32066            | 24319 |     | 21055 |      |   |
| 51.9970187311191 | 100   | 140 | 0     | Open | ; |
| 32067            | 22978 |     | 22979 |      |   |
| 51.9722250417951 | 75    | 150 | 0     | Open | ; |
| 32068            | 20543 |     | 20343 |      |   |
| 51.9925850726877 | 110   | 150 | 0     | Open | ; |
| 32069            | 24218 |     | 21293 |      |   |

|                     |       |     |       |      |   |
|---------------------|-------|-----|-------|------|---|
| 51.9960161621176    | 75    | 140 | 0     | Open | ; |
| 32070               | 23834 |     | 23835 |      |   |
| 51.9969408227073    | 75    | 150 | 0     | Open | ; |
| 32071               | 20988 |     | 20989 |      |   |
| 51.9969408238332    | 75    | 150 | 0     | Open | ; |
| 32072               | 23905 |     | 23906 |      |   |
| 51.9969408227027    | 75    | 150 | 0     | Open | ; |
| 32073               | 21088 |     | 23055 |      |   |
| 51.9969462716195    | 75    | 150 | 0     | Open | ; |
| 32074               | 21298 |     | 21299 |      |   |
| 51.9969625593656    | 75    | 150 | 0     | Open | ; |
| 32075               | 19464 |     | 20879 |      |   |
| 51.9970686526388    | 75    | 140 | 0     | Open | ; |
| 32076               | 19910 |     | 19908 |      |   |
| 51.9985699456232    | 150   | 140 | 0     | Open | ; |
| 32077               | 23672 |     | 23859 |      |   |
| 51.9986964383288    | 75    | 140 | 0     | Open | ; |
| 32078               | 23231 |     | 23232 |      |   |
| 52.0080200272776    | 160   | 150 | 0     | Open | ; |
| 32079               | 19794 |     | 19792 |      |   |
| 52.0145458744198    | 75    | 140 | 0     | Open | ; |
| 32080               | 24755 |     | 24756 |      |   |
| 52.1442066808655    | 110   | 150 | 0     | Open | ; |
| 32081               | 20155 |     | 20218 |      |   |
| 52.2115991071554    | 75    | 140 | 0     | Open | ; |
| 32082               | 22988 |     | 24182 |      |   |
| 52.2142925554356    | 110   | 150 | 0     | Open | ; |
| 32083               | 21480 |     | 23251 |      |   |
| 53.4792864885085    | 110   | 150 | 0     | Open | ; |
| 32084               | 19720 |     | 19536 |      |   |
| 52.3342383526572    | 125   | 140 | 0     | Open | ; |
| 32085               | 19880 |     | 23907 |      |   |
| 52.3566665647485    | 75    | 150 | 0     | Open | ; |
| 32086               | 23812 |     | 23813 |      |   |
| 52.3640110701633    | 75    | 150 | 0     | Open | ; |
| 32087               | 22996 |     | 22997 |      |   |
| 52.3693755270974    | 75    | 140 | 0     | Open | ; |
| 32088               | 19288 |     | 20170 |      |   |
| 52.3752990572874    | 110   | 150 | 0     | Open | ; |
| 32089               | 19607 |     | 23991 |      |   |
| 52.373774479237 160 |       | 150 | 0     | Open | ; |
| 32090               | 21059 |     | 20229 |      |   |
| 52.4750307213704    | 75    | 150 | 0     | Open | ; |
| 32091               | 23329 |     | 21010 |      |   |
| 52.6637484836545    | 100   | 140 | 0     | Open | ; |
| 32092               | 19024 |     | 21788 |      |   |
| 52.6708786202352    | 110   | 150 | 0     | Open | ; |
| 32093               | 19679 |     | 19132 |      |   |
| 52.6754827034146    | 75    | 140 | 0     | Open | ; |
| 32094               | 20725 |     | 22956 |      |   |

|                  |       |     |       |      |   |
|------------------|-------|-----|-------|------|---|
| 52.7144899487088 | 110   | 150 | 0     | Open | ; |
| 32095            | 18627 |     | 18629 |      |   |
| 52.7943527652044 | 100   | 140 | 0     | Open | ; |
| 32096            | 19023 |     | 22414 |      |   |
| 52.810323314025  | 110   | 150 | 0     | Open | ; |
| 32097            | 21255 |     | 21768 |      |   |
| 52.9009301640873 | 110   | 150 | 0     | Open | ; |
| 32098            | 19508 |     | 19910 |      |   |
| 52.9195026087493 | 150   | 140 | 0     | Open | ; |
| 32099            | 23560 |     | 19949 |      |   |
| 54.9833457016564 | 150   | 140 | 0     | Open | ; |
| 32100            | 20070 |     | 22769 |      |   |
| 52.928810728725  | 75    | 150 | 0     | Open | ; |
| 32101            | 18629 |     | 19695 |      |   |
| 52.9866248262874 | 100   | 140 | 0     | Open | ; |
| 32102            | 23374 |     | 23375 |      |   |
| 52.996834036278  | 75    | 150 | 0     | Open | ; |
| 32103            | 21179 |     | 21555 |      |   |
| 52.9968753488578 | 75    | 150 | 0     | Open | ; |
| 32104            | 21221 |     | 21222 |      |   |
| 52.9968917499497 | 100   | 140 | 0     | Open | ; |
| 32105            | 21175 |     | 21270 |      |   |
| 52.9969064840726 | 75    | 150 | 0     | Open | ; |
| 32106            | 21540 |     | 21541 |      |   |
| 52.9969170261187 | 75    | 140 | 0     | Open | ; |
| 32107            | 25054 |     | 23916 |      |   |
| 53.000426504816  | 75    | 140 | 0     | Open | ; |
| 32108            | 18486 |     | 21923 |      |   |
| 52.9982607117528 | 100   | 140 | 0     | Open | ; |
| 32109            | 19706 |     | 23513 |      |   |
| 52.9983876890256 | 125   | 150 | 0     | Open | ; |
| 32110            | 19126 |     | 20027 |      |   |
| 53.0066726919225 | 75    | 140 | 0     | Open | ; |
| 32111            | 19534 |     | 19535 |      |   |
| 57.0773959961341 | 110   | 150 | 0     | Open | ; |
| 32112            | 19128 |     | 19134 |      |   |
| 53.0152941553436 | 125   | 140 | 0     | Open | ; |
| 32113            | 18546 |     | 18548 |      |   |
| 53.0404600779002 | 110   | 150 | 0     | Open | ; |
| 32114            | 23047 |     | 23915 |      |   |
| 49.6045927910193 | 100   | 140 | 0     | Open | ; |
| 32115            | 24392 |     | 25062 |      |   |
| 53.127055132623  | 75    | 150 | 0     | Open | ; |
| 32116            | 18886 |     | 18627 |      |   |
| 53.0835417756889 | 100   | 140 | 0     | Open | ; |
| 32117            | 21905 |     | 21906 |      |   |
| 53.0913678514897 | 75    | 150 | 0     | Open | ; |
| 32118            | 20710 |     | 22892 |      |   |
| 53.0952617310365 | 75    | 150 | 0     | Open | ; |
| 32119            | 18782 |     | 18633 |      |   |



|                     |       |     |       |      |   |
|---------------------|-------|-----|-------|------|---|
| 53.9323209138636    | 160   | 150 | 0     | Open | ; |
| 32120               | 19134 |     | 20227 |      |   |
| 53.1248885459491    | 125   | 140 | 0     | Open | ; |
| 32121               | 21560 |     | 21561 |      |   |
| 53.1404520731824    | 125   | 140 | 0     | Open | ; |
| 32122               | 23208 |     | 22130 |      |   |
| 53.1971592254078    | 100   | 140 | 0     | Open | ; |
| 32123               | 24384 |     | 21702 |      |   |
| 53.2212958598351    | 110   | 150 | 0     | Open | ; |
| 32124               | 18556 |     | 19030 |      |   |
| 209.063120300552    | 110   | 150 | 0     | Open | ; |
| 32125               | 23814 |     | 23815 |      |   |
| 53.2483169185 75    |       | 150 | 0     | Open | ; |
| 32126               | 19481 |     | 19482 |      |   |
| 53.2703989294458    | 75    | 140 | 0     | Open | ; |
| 32127               | 24905 |     | 21061 |      |   |
| 53.3583535106957    | 110   | 150 | 0     | Open | ; |
| 32128               | 24333 |     | 20598 |      |   |
| 73.9973798761558    | 75    | 150 | 0     | Open | ; |
| 32129               | 21901 |     | 21902 |      |   |
| 53.4359273400933    | 75    | 150 | 0     | Open | ; |
| 32130               | 23864 |     | 23865 |      |   |
| 53.5470903539028    | 110   | 150 | 0     | Open | ; |
| 32131               | 21293 |     | 21295 |      |   |
| 53.5526668820541    | 75    | 140 | 0     | Open | ; |
| 32132               | 23236 |     | 21295 |      |   |
| 53.6219919285854    | 75    | 140 | 0     | Open | ; |
| 32133               | 19398 |     | 21063 |      |   |
| 62.9965228685359    | 110   | 150 | 0     | Open | ; |
| 32134               | 24482 |     | 24503 |      |   |
| 53.7526482711524    | 75    | 150 | 0     | Open | ; |
| 32135               | 22290 |     | 20443 |      |   |
| 53.759874330115 90  |       | 150 | 0     | Open | ; |
| 32136               | 22119 |     | 22120 |      |   |
| 53.7740564977895    | 75    | 140 | 0     | Open | ; |
| 32137               | 22018 |     | 22019 |      |   |
| 53.8193200702439    | 100   | 140 | 0     | Open | ; |
| 32138               | 23994 |     | 19175 |      |   |
| 53.864374124218 75  |       | 140 | 0     | Open | ; |
| 32139               | 18624 |     | 18617 |      |   |
| 53.867706288952 100 |       | 140 | 0     | Open | ; |
| 32140               | 21708 |     | 24646 |      |   |
| 53.8686785468697    | 160   | 150 | 0     | Open | ; |
| 32141               | 21794 |     | 21796 |      |   |
| 53.870660736564 75  |       | 140 | 0     | Open | ; |
| 32142               | 20791 |     | 18538 |      |   |
| 53.885067762723 100 |       | 140 | 0     | Open | ; |
| 32143               | 23755 |     | 18916 |      |   |
| 53.8966797878331    | 150   | 140 | 0     | Open | ; |
| 32144               | 21971 |     | 21972 |      |   |

|                  |       |     |       |      |   |
|------------------|-------|-----|-------|------|---|
| 53.9012320792828 | 75    | 150 | 0     | Open | ; |
| 32145            | 23400 |     | 23401 |      |   |
| 53.9347379247747 | 75    | 140 | 0     | Open | ; |
| 32146            | 20372 |     | 19802 |      |   |
| 53.9394570617507 | 200   | 150 | 0     | Open | ; |
| 32147            | 23594 |     | 21893 |      |   |
| 53.9507855700534 | 100   | 140 | 0     | Open | ; |
| 32148            | 20508 |     | 20854 |      |   |
| 53.9829591452561 | 200   | 140 | 0     | Open | ; |
| 32149            | 25023 |     | 19882 |      |   |
| 53.9840814824903 | 75    | 140 | 0     | Open | ; |
| 32150            | 22496 |     | 22312 |      |   |
| 53.9842947094861 | 110   | 150 | 0     | Open | ; |
| 32151            | 19250 |     | 19251 |      |   |
| 53.9968181812427 | 75    | 150 | 0     | Open | ; |
| 32152            | 19290 |     | 19291 |      |   |
| 53.9968769871916 | 125   | 150 | 0     | Open | ; |
| 32153            | 21269 |     | 20323 |      |   |
| 53.9969146154467 | 75    | 150 | 0     | Open | ; |
| 32154            | 18941 |     | 18942 |      |   |
| 53.9969458447726 | 75    | 140 | 0     | Open | ; |
| 32155            | 21195 |     | 21429 |      |   |
| 53.9971680121828 | 100   | 140 | 0     | Open | ; |
| 32157            | 23195 |     | 23196 |      |   |
| 54.0109932647961 | 75    | 150 | 0     | Open | ; |
| 32158            | 23946 |     | 22059 |      |   |
| 54.0157664842723 | 100   | 140 | 0     | Open | ; |
| 32159            | 21816 |     | 21817 |      |   |
| 54.6390608562265 | 100   | 140 | 0     | Open | ; |
| 32160            | 19172 |     | 19174 |      |   |
| 54.0730674406396 | 110   | 150 | 0     | Open | ; |
| 32161            | 20615 |     | 20616 |      |   |
| 54.1126670034223 | 110   | 150 | 0     | Open | ; |
| 32162            | 21200 |     | 21201 |      |   |
| 54.1190531662298 | 110   | 150 | 0     | Open | ; |
| 32163            | 24668 |     | 24663 |      |   |
| 59.2051390355233 | 200   | 150 | 0     | Open | ; |
| 32164            | 19881 |     | 22170 |      |   |
| 54.1844142638546 | 125   | 100 | 0     | Open | ; |
| 32165            | 24369 |     | 22774 |      |   |
| 54.4567309791618 | 100   | 140 | 0     | Open | ; |
| 32166            | 22918 |     | 20211 |      |   |
| 57.5378665235176 | 200   | 140 | 0     | Open | ; |
| 32167            | 23800 |     | 24330 |      |   |
| 54.307705346481  | 75    | 140 | 0     | Open | ; |
| 32168            | 19980 |     | 19981 |      |   |
| 54.3401029244981 | 110   | 150 | 0     | Open | ; |
| 32169            | 21471 |     | 21472 |      |   |
| 54.3504203424829 | 110   | 150 | 0     | Open | ; |
| 32170            | 21357 |     | 21355 |      |   |

|                  |       |     |       |      |   |
|------------------|-------|-----|-------|------|---|
| 54.3983129946291 | 110   | 150 | 0     | Open | ; |
| 32171            | 20702 |     | 22462 |      |   |
| 54.4318848108478 | 75    | 150 | 0     | Open | ; |
| 32172            | 24642 |     | 24969 |      |   |
| 65.3549212357657 | 110   | 150 | 0     | Open | ; |
| 32173            | 20424 |     | 20425 |      |   |
| 54.4906721881242 | 75    | 150 | 0     | Open | ; |
| 32174            | 21154 |     | 21155 |      |   |
| 54.4969190488258 | 75    | 150 | 0     | Open | ; |
| 32175            | 18905 |     | 23101 |      |   |
| 63.5595700057167 | 100   | 140 | 0     | Open | ; |
| 32176            | 21190 |     | 19273 |      |   |
| 54.5969670789823 | 110   | 150 | 0     | Open | ; |
| 32177            | 18876 |     | 19538 |      |   |
| 54.6913625571632 | 100   | 140 | 0     | Open | ; |
| 32178            | 20970 |     | 22861 |      |   |
| 181.252622692086 | 300   | 100 | 0     | Open | ; |
| 32179            | 20141 |     | 21267 |      |   |
| 54.7434493567038 | 110   | 150 | 0     | Open | ; |
| 32180            | 22010 |     | 21014 |      |   |
| 76.7245629016359 | 110   | 150 | 0     | Open | ; |
| 32181            | 21903 |     | 21904 |      |   |
| 54.7480875006699 | 75    | 150 | 0     | Open | ; |
| 32182            | 23127 |     | 20757 |      |   |
| 57.0746795061618 | 125   | 150 | 0     | Open | ; |
| 32183            | 18598 |     | 18599 |      |   |
| 54.7579363578832 | 150   | 140 | 0     | Open | ; |
| 32184            | 23232 |     | 24952 |      |   |
| 63.0882336395239 | 160   | 150 | 0     | Open | ; |
| 32185            | 23361 |     | 22578 |      |   |
| 54.9677427208467 | 125   | 140 | 0     | Open | ; |
| 32186            | 22871 |     | 18527 |      |   |
| 54.9646461967503 | 160   | 150 | 0     | Open | ; |
| 32187            | 21198 |     | 21199 |      |   |
| 54.9948312516433 | 75    | 140 | 0     | Open | ; |
| 32188            | 23064 |     | 20520 |      |   |
| 54.9949039431493 | 110   | 150 | 0     | Open | ; |
| 32189            | 23475 |     | 23476 |      |   |
| 54.9967013420038 | 75    | 150 | 0     | Open | ; |
| 32190            | 19053 |     | 24285 |      |   |
| 54.9967092614963 | 100   | 140 | 0     | Open | ; |
| 32191            | 20986 |     | 20987 |      |   |
| 54.9968091788064 | 75    | 150 | 0     | Open | ; |
| 32192            | 19205 |     | 19967 |      |   |
| 54.9968105763475 | 75    | 150 | 0     | Open | ; |
| 32193            | 19864 |     | 19865 |      |   |
| 54.9968212732168 | 75    | 150 | 0     | Open | ; |
| 32194            | 19203 |     | 19947 |      |   |
| 54.9968339057273 | 75    | 150 | 0     | Open | ; |
| 32195            | 22945 |     | 22946 |      |   |

|                     |       |     |       |      |   |
|---------------------|-------|-----|-------|------|---|
| 54.9976647323023    | 100   | 140 | 0     | Open | ; |
| 32196               | 21156 |     | 21157 |      |   |
| 55.0009730913265    | 75    | 150 | 0     | Open | ; |
| 32197               | 21795 |     | 18625 |      |   |
| 55.0119733409108    | 75    | 140 | 0     | Open | ; |
| 32198               | 22461 |     | 19342 |      |   |
| 55.0359839727037    | 100   | 140 | 0     | Open | ; |
| 32200               | 23533 |     | 23826 |      |   |
| 55.0445910002845    | 100   | 140 | 0     | Open | ; |
| 32201               | 20568 |     | 20247 |      |   |
| 55.0455902613768    | 160   | 150 | 0     | Open | ; |
| 32202               | 23274 |     | 22750 |      |   |
| 55.1499819189329    | 110   | 150 | 0     | Open | ; |
| 32203               | 19579 |     | 19580 |      |   |
| 55.154079510131 160 |       | 150 | 0     | Open | ; |
| 32204               | 19859 |     | 18906 |      |   |
| 55.1745773475856    | 100   | 140 | 0     | Open | ; |
| 32205               | 24166 |     | 19834 |      |   |
| 50.3484353062041    | 100   | 140 | 0     | Open | ; |
| 32206               | 19081 |     | 19082 |      |   |
| 55.261589472248 100 |       | 140 | 0     | Open | ; |
| 32207               | 23514 |     | 19475 |      |   |
| 76.090295224213 75  |       | 140 | 0     | Open | ; |
| 32208               | 24886 |     | 24885 |      |   |
| 55.3164787217083    | 110   | 150 | 0     | Open | ; |
| 32209               | 23984 |     | 23985 |      |   |
| 55.317305374144 100 |       | 140 | 0     | Open | ; |
| 32210               | 21798 |     | 21799 |      |   |
| 55.3220747503915    | 75    | 150 | 0     | Open | ; |
| 32211               | 21860 |     | 21861 |      |   |
| 55.3263638879738    | 160   | 150 | 0     | Open | ; |
| 32212               | 22850 |     | 21705 |      |   |
| 55.3777831273054    | 75    | 140 | 0     | Open | ; |
| 32213               | 22082 |     | 20686 |      |   |
| 55.391853571405 226 |       | 150 | 0     | Open | ; |
| 32214               | 18503 |     | 21749 |      |   |
| 55.4256826917721    | 110   | 150 | 0     | Open | ; |
| 32215               | 21760 |     | 21761 |      |   |
| 55.4587060343311    | 110   | 150 | 0     | Open | ; |
| 32216               | 18704 |     | 21353 |      |   |
| 55.4972066047079    | 110   | 150 | 0     | Open | ; |
| 32217               | 24829 |     | 24830 |      |   |
| 55.4982470433585    | 110   | 150 | 0     | Open | ; |
| 32218               | 19076 |     | 20183 |      |   |
| 55.530585124322 110 |       | 150 | 0     | Open | ; |
| 32219               | 19532 |     | 19533 |      |   |
| 55.5467545858585    | 110   | 150 | 0     | Open | ; |
| 32220               | 19846 |     | 18729 |      |   |
| 55.559775037846 75  |       | 150 | 0     | Open | ; |
| 32221               | 18582 |     | 22094 |      |   |

|                  |       |     |       |      |   |
|------------------|-------|-----|-------|------|---|
| 55.5695572606185 | 160   | 150 | 0     | Open | ; |
| 32222            | 19286 |     | 19287 |      |   |
| 55.6638317206388 | 110   | 150 | 0     | Open | ; |
| 32223            | 21363 |     | 21330 |      |   |
| 55.7013775692835 | 75    | 140 | 0     | Open | ; |
| 32224            | 21353 |     | 21354 |      |   |
| 55.7045373133068 | 110   | 150 | 0     | Open | ; |
| 32225            | 18801 |     | 19697 |      |   |
| 55.7264797227105 | 140   | 150 | 0     | Open | ; |
| 32226            | 20561 |     | 22356 |      |   |
| 55.7508226712257 | 110   | 150 | 0     | Open | ; |
| 32227            | 21205 |     | 18609 |      |   |
| 55.7562897141135 | 160   | 150 | 0     | Open | ; |
| 32228            | 20873 |     | 20874 |      |   |
| 55.7693707271281 | 200   | 150 | 0     | Open | ; |
| 32229            | 24130 |     | 23984 |      |   |
| 55.7717544202318 | 100   | 140 | 0     | Open | ; |
| 32230            | 23908 |     | 23909 |      |   |
| 55.8705691417242 | 75    | 140 | 0     | Open | ; |
| 32231            | 23849 |     | 23850 |      |   |
| 55.93902299548   | 75    | 150 | 0     | Open | ; |
| 32232            | 19554 |     | 23640 |      |   |
| 55.9547156735688 | 150   | 100 | 0     | Open | ; |
| 32233            | 20280 |     | 22771 |      |   |
| 55.9909282531722 | 110   | 150 | 0     | Open | ; |
| 32234            | 20647 |     | 19982 |      |   |
| 55.9941141944038 | 75    | 140 | 0     | Open | ; |
| 32235            | 23750 |     | 23751 |      |   |
| 55.9966980325742 | 125   | 150 | 0     | Open | ; |
| 32236            | 23728 |     | 23729 |      |   |
| 55.9965068999909 | 75    | 140 | 0     | Open | ; |
| 32237            | 22789 |     | 23839 |      |   |
| 55.9966453476846 | 75    | 140 | 0     | Open | ; |
| 32238            | 19748 |     | 19446 |      |   |
| 55.9967560804467 | 75    | 140 | 0     | Open | ; |
| 32239            | 19703 |     | 19901 |      |   |
| 55.9967872697958 | 160   | 150 | 0     | Open | ; |
| 32240            | 20013 |     | 22964 |      |   |
| 55.996798373817  | 450   | 100 | 0     | Open | ; |
| 32241            | 18824 |     | 18773 |      |   |
| 55.9968311619848 | 100   | 140 | 0     | Open | ; |
| 32242            | 18490 |     | 24378 |      |   |
| 55.9968694061139 | 75    | 140 | 0     | Open | ; |
| 32243            | 21180 |     | 23420 |      |   |
| 55.9987277577232 | 110   | 150 | 0     | Open | ; |
| 32244            | 19787 |     | 23910 |      |   |
| 56.0365566226159 | 100   | 140 | 0     | Open | ; |
| 32245            | 24468 |     | 24573 |      |   |
| 56.1083755356815 | 110   | 150 | 0     | Open | ; |
| 32246            | 22797 |     | 21331 |      |   |

|                     |       |     |       |      |   |
|---------------------|-------|-----|-------|------|---|
| 56.1145653163425    | 75    | 140 | 0     | Open | ; |
| 32247               | 22704 |     | 22199 |      |   |
| 56.138068540502 110 |       | 150 | 0     | Open | ; |
| 32248               | 21351 |     | 21352 |      |   |
| 56.1958946119958    | 160   | 150 | 0     | Open | ; |
| 32249               | 21716 |     | 21040 |      |   |
| 56.22496302216 125  |       | 140 | 0     | Open | ; |
| 32250               | 22236 |     | 25017 |      |   |
| 56.2316013327951    | 100   | 140 | 0     | Open | ; |
| 32251               | 20063 |     | 20061 |      |   |
| 56.2299305390723    | 75    | 140 | 0     | Open | ; |
| 32252               | 18789 |     | 20249 |      |   |
| 56.2569564766799    | 200   | 150 | 0     | Open | ; |
| 32253               | 20775 |     | 22075 |      |   |
| 56.2771519484352    | 110   | 150 | 0     | Open | ; |
| 32254               | 23001 |     | 23084 |      |   |
| 56.3501021410416    | 100   | 140 | 0     | Open | ; |
| 32255               | 22495 |     | 22310 |      |   |
| 56.3765658314621    | 110   | 150 | 0     | Open | ; |
| 32256               | 24376 |     | 24374 |      |   |
| 60.7525311274612    | 110   | 150 | 0     | Open | ; |
| 32257               | 24018 |     | 22973 |      |   |
| 78.6954808886344    | 110   | 150 | 0     | Open | ; |
| 32258               | 24632 |     | 24619 |      |   |
| 56.5448197866728    | 160   | 150 | 0     | Open | ; |
| 32259               | 23896 |     | 23486 |      |   |
| 56.5630587770718    | 75    | 140 | 0     | Open | ; |
| 32260               | 20015 |     | 20016 |      |   |
| 56.5967236925973    | 75    | 140 | 0     | Open | ; |
| 32261               | 19483 |     | 23003 |      |   |
| 56.6304893543369    | 75    | 140 | 0     | Open | ; |
| 32262               | 20216 |     | 20217 |      |   |
| 56.6378288604067    | 100   | 140 | 0     | Open | ; |
| 32263               | 22204 |     | 22387 |      |   |
| 56.6488988083329    | 200   | 150 | 0     | Open | ; |
| 32264               | 23130 |     | 24234 |      |   |
| 60.5785469327804    | 75    | 150 | 0     | Open | ; |
| 32265               | 24320 |     | 20218 |      |   |
| 77.0402993834696    | 75    | 140 | 0     | Open | ; |
| 32266               | 22540 |     | 24175 |      |   |
| 56.6968317247275    | 125   | 150 | 0     | Open | ; |
| 32267               | 21607 |     | 21605 |      |   |
| 314.859593484081    | 110   | 150 | 0     | Open | ; |
| 32268               | 19127 |     | 19128 |      |   |
| 56.704180375407 125 |       | 140 | 0     | Open | ; |
| 32269               | 18549 |     | 18547 |      |   |
| 56.7718296244514    | 110   | 150 | 0     | Open | ; |
| 32270               | 20560 |     | 22604 |      |   |
| 56.7992266951109    | 160   | 150 | 0     | Open | ; |
| 32271               | 19344 |     | 19345 |      |   |

|                     |       |     |       |      |   |
|---------------------|-------|-----|-------|------|---|
| 56.8070743978742    | 100   | 140 | 0     | Open | ; |
| 32272               | 23922 |     | 24372 |      |   |
| 78.9878115971802    | 75    | 140 | 0     | Open | ; |
| 32273               | 23421 |     | 23423 |      |   |
| 56.8968251973843    | 110   | 150 | 0     | Open | ; |
| 32274               | 20357 |     | 22289 |      |   |
| 56.8992871554206    | 90    | 150 | 0     | Open | ; |
| 32275               | 20184 |     | 20144 |      |   |
| 56.9319522072898    | 110   | 150 | 0     | Open | ; |
| 32276               | 22141 |     | 21638 |      |   |
| 56.9967909578048    | 160   | 150 | 0     | Open | ; |
| 32277               | 19000 |     | 20865 |      |   |
| 56.9913053474947    | 100   | 140 | 0     | Open | ; |
| 32278               | 21043 |     | 21044 |      |   |
| 56.9948988580916    | 75    | 150 | 0     | Open | ; |
| 32279               | 20266 |     | 18660 |      |   |
| 56.995690739568 250 |       | 140 | 0     | Open | ; |
| 32280               | 23033 |     | 22873 |      |   |
| 56.9960865733961    | 200   | 150 | 0     | Open | ; |
| 32281               | 20112 |     | 20113 |      |   |
| 56.9965362109934    | 75    | 150 | 0     | Open | ; |
| 32282               | 18947 |     | 18948 |      |   |
| 56.9966063187413    | 75    | 140 | 0     | Open | ; |
| 32283               | 20405 |     | 20565 |      |   |
| 56.9966116155654    | 100   | 130 | 0     | Open | ; |
| 32284               | 23722 |     | 23723 |      |   |
| 56.9966410490835    | 75    | 150 | 0     | Open | ; |
| 32285               | 19357 |     | 19374 |      |   |
| 56.9967773098869    | 100   | 140 | 0     | Open | ; |
| 32286               | 23612 |     | 23617 |      |   |
| 56.9967789203663    | 75    | 150 | 0     | Open | ; |
| 32287               | 23193 |     | 20863 |      |   |
| 56.9968004796316    | 75    | 140 | 0     | Open | ; |
| 32288               | 21515 |     | 21190 |      |   |
| 56.9968027096469    | 110   | 150 | 0     | Open | ; |
| 32289               | 21055 |     | 19370 |      |   |
| 56.9971239264567    | 100   | 140 | 0     | Open | ; |
| 32290               | 21355 |     | 21356 |      |   |
| 56.9979819908392    | 110   | 150 | 0     | Open | ; |
| 32291               | 19535 |     | 22028 |      |   |
| 56.9986563374969    | 110   | 150 | 0     | Open | ; |
| 32292               | 22391 |     | 22392 |      |   |
| 57.0000682522433    | 110   | 150 | 0     | Open | ; |
| 32293               | 19114 |     | 19115 |      |   |
| 57.0478640889267    | 75    | 140 | 0     | Open | ; |
| 32294               | 24721 |     | 24728 |      |   |
| 57.0778500416795    | 110   | 150 | 0     | Open | ; |
| 32295               | 19003 |     | 19838 |      |   |
| 57.2246332642128    | 160   | 150 | 0     | Open | ; |
| 32296               | 20157 |     | 20158 |      |   |

|                    |       |     |       |      |   |
|--------------------|-------|-----|-------|------|---|
| 57.2249207397101   | 110   | 150 | 0     | Open | ; |
| 32297              | 20203 |     | 20202 |      |   |
| 57.2617524666747   | 150   | 140 | 0     | Open | ; |
| 32298              | 24883 |     | 24884 |      |   |
| 57.3154061794371   | 110   | 150 | 0     | Open | ; |
| 32299              | 24209 |     | 25040 |      |   |
| 57.6238807816723   | 110   | 150 | 0     | Open | ; |
| 32300              | 23330 |     | 23329 |      |   |
| 57.3254043841685   | 100   | 140 | 0     | Open | ; |
| 32301              | 20982 |     | 25136 |      |   |
| 78.2741799001361   | 75    | 140 | 0     | Open | ; |
| 32302              | 22040 |     | 22041 |      |   |
| 57.4060626266559   | 125   | 140 | 0     | Open | ; |
| 32303              | 23113 |     | 24131 |      |   |
| 57.4155542049812   | 110   | 150 | 0     | Open | ; |
| 32304              | 19264 |     | 19265 |      |   |
| 57.4306960396136   | 75    | 150 | 0     | Open | ; |
| 32305              | 20193 |     | 20194 |      |   |
| 57.4912991481678   | 100   | 140 | 0     | Open | ; |
| 32306              | 19075 |     | 19076 |      |   |
| 57.5145407916708   | 110   | 150 | 0     | Open | ; |
| 32307              | 23326 |     | 19338 |      |   |
| 52.431031871467 75 |       | 140 | 0     | Open | ; |
| 32308              | 24260 |     | 22992 |      |   |
| 57.597321663537 75 |       | 140 | 0     | Open | ; |
| 32309              | 19256 |     | 22857 |      |   |
| 57.6165296127152   | 75    | 140 | 0     | Open | ; |
| 32310              | 20785 |     | 19077 |      |   |
| 57.6341721181001   | 125   | 150 | 0     | Open | ; |
| 32311              | 19207 |     | 23078 |      |   |
| 57.8384952470479   | 110   | 150 | 0     | Open | ; |
| 32312              | 23519 |     | 23520 |      |   |
| 57.8677996316529   | 110   | 150 | 0     | Open | ; |
| 32313              | 22061 |     | 22062 |      |   |
| 57.8801499206496   | 250   | 100 | 0     | Open | ; |
| 32314              | 18552 |     | 18553 |      |   |
| 57.9851047081377   | 110   | 150 | 0     | Open | ; |
| 32315              | 20817 |     | 23868 |      |   |
| 57.9966979340087   | 75    | 150 | 0     | Open | ; |
| 32316              | 18938 |     | 18940 |      |   |
| 74.9582625624778   | 110   | 150 | 0     | Open | ; |
| 32317              | 22980 |     | 22393 |      |   |
| 57.9868775365652   | 75    | 150 | 0     | Open | ; |
| 32318              | 21834 |     | 21835 |      |   |
| 57.994371557369 75 |       | 140 | 0     | Open | ; |
| 32319              | 18465 |     | 18466 |      |   |
| 57.9956085583504   | 75    | 140 | 0     | Open | ; |
| 32320              | 19895 |     | 23358 |      |   |
| 57.9965619098569   | 75    | 140 | 0     | Open | ; |
| 32321              | 18539 |     | 22625 |      |   |



|                  |       |     |       |      |   |
|------------------|-------|-----|-------|------|---|
| 57.9965875733952 | 100   | 140 | 0     | Open | ; |
| 32322            | 20219 |     | 20220 |      |   |
| 57.9966134196245 | 75    | 140 | 0     | Open | ; |
| 32323            | 18758 |     | 18759 |      |   |
| 57.9966753159503 | 75    | 150 | 0     | Open | ; |
| 32324            | 20213 |     | 20214 |      |   |
| 57.9966937398671 | 75    | 140 | 0     | Open | ; |
| 32325            | 18657 |     | 18658 |      |   |
| 57.9967321365505 | 110   | 150 | 0     | Open | ; |
| 32326            | 22410 |     | 20143 |      |   |
| 57.9968159404482 | 110   | 150 | 0     | Open | ; |
| 32327            | 18538 |     | 18539 |      |   |
| 57.9997189726988 | 100   | 140 | 0     | Open | ; |
| 32328            | 19175 |     | 19180 |      |   |
| 57.9987975008268 | 75    | 140 | 0     | Open | ; |
| 32329            | 19919 |     | 19920 |      |   |
| 58.0007635870083 | 200   | 140 | 0     | Open | ; |
| 32330            | 23626 |     | 23625 |      |   |
| 58.0011897583875 | 125   | 140 | 0     | Open | ; |
| 32331            | 21654 |     | 18475 |      |   |
| 58.0039791546107 | 100   | 140 | 0     | Open | ; |
| 32332            | 22958 |     | 22959 |      |   |
| 58.0052034310145 | 110   | 150 | 0     | Open | ; |
| 32333            | 24968 |     | 23576 |      |   |
| 58.0107397420643 | 100   | 140 | 0     | Open | ; |
| 32334            | 23952 |     | 19180 |      |   |
| 58.01216773209   | 75    | 140 | 0     | Open | ; |
| 32335            | 23952 |     | 19180 |      |   |
| 158.285241725105 | 75    | 140 | 0     | Open | ; |
| 32336            | 22601 |     | 20040 |      |   |
| 58.0973797145136 | 160   | 150 | 0     | Open | ; |
| 32337            | 21628 |     | 20564 |      |   |
| 58.1071606106823 | 75    | 150 | 0     | Open | ; |
| 32338            | 23678 |     | 20614 |      |   |
| 58.1135992795522 | 75    | 150 | 0     | Open | ; |
| 32339            | 23114 |     | 21889 |      |   |
| 58.1462058843348 | 110   | 150 | 0     | Open | ; |
| 32340            | 19466 |     | 23278 |      |   |
| 62.4966869548395 | 125   | 150 | 0     | Open | ; |
| 32341            | 24274 |     | 18799 |      |   |
| 58.4880639027532 | 100   | 140 | 0     | Open | ; |
| 32342            | 22126 |     | 22127 |      |   |
| 58.2888258826805 | 150   | 140 | 0     | Open | ; |
| 32343            | 24724 |     | 24726 |      |   |
| 58.2905999943931 | 140   | 150 | 0     | Open | ; |
| 32344            | 24696 |     | 24447 |      |   |
| 58.3223029384328 | 110   | 150 | 0     | Open | ; |
| 32345            | 23773 |     | 23774 |      |   |
| 58.3734422526843 | 110   | 150 | 0     | Open | ; |
| 32346            | 23701 |     | 24957 |      |   |

|                     |       |     |       |  |      |   |
|---------------------|-------|-----|-------|--|------|---|
| 58.3559095921942    | 75    | 140 | 0     |  | Open | ; |
| 32347               | 19356 |     | 19352 |  |      |   |
| 58.39941495431 110  |       | 150 | 0     |  | Open | ; |
| 32348               | 23373 |     | 21427 |  |      |   |
| 58.4148203760242    | 110   | 150 | 0     |  | Open | ; |
| 32349               | 19199 |     | 23728 |  |      |   |
| 58.4237221790005    | 75    | 140 | 0     |  | Open | ; |
| 32350               | 21973 |     | 21974 |  |      |   |
| 58.4554736512081    | 110   | 150 | 0     |  | Open | ; |
| 32351               | 20281 |     | 22132 |  |      |   |
| 58.4973393598639    | 450   | 100 | 0     |  | Open | ; |
| 32352               | 21001 |     | 23425 |  |      |   |
| 58.5090571441612    | 200   | 150 | 0     |  | Open | ; |
| 32353               | 24507 |     | 24791 |  |      |   |
| 58.5457384627511    | 110   | 150 | 0     |  | Open | ; |
| 32354               | 19951 |     | 19953 |  |      |   |
| 58.5472478506944    | 100   | 140 | 0     |  | Open | ; |
| 32355               | 22785 |     | 20336 |  |      |   |
| 58.5941736035721    | 110   | 150 | 0     |  | Open | ; |
| 32356               | 24315 |     | 23247 |  |      |   |
| 65.7411944467956    | 75    | 140 | 0     |  | Open | ; |
| 32357               | 23305 |     | 22614 |  |      |   |
| 58.6402653659323    | 100   | 140 | 0     |  | Open | ; |
| 32358               | 24926 |     | 24928 |  |      |   |
| 58.923734549394 110 |       | 150 | 0     |  | Open | ; |
| 32359               | 18949 |     | 18951 |  |      |   |
| 58.9800365035002    | 110   | 150 | 0     |  | Open | ; |
| 32360               | 22050 |     | 23239 |  |      |   |
| 58.980260131643 100 |       | 140 | 0     |  | Open | ; |
| 32361               | 23762 |     | 23763 |  |      |   |
| 58.9964990830877    | 75    | 150 | 0     |  | Open | ; |
| 32362               | 19522 |     | 23033 |  |      |   |
| 58.9972225527201    | 200   | 150 | 0     |  | Open | ; |
| 32363               | 19373 |     | 22019 |  |      |   |
| 59.0514341371614    | 100   | 140 | 0     |  | Open | ; |
| 32364               | 23753 |     | 22778 |  |      |   |
| 59.2787932682972    | 100   | 140 | 0     |  | Open | ; |
| 32365               | 24903 |     | 24904 |  |      |   |
| 98.9812194559333    | 110   | 150 | 0     |  | Open | ; |
| 32366               | 23757 |     | 21262 |  |      |   |
| 59.3026583526978    | 100   | 140 | 0     |  | Open | ; |
| 32367               | 20436 |     | 22779 |  |      |   |
| 60.1615104440938    | 300   | 140 | 0     |  | Open | ; |
| 32368               | 23127 |     | 23128 |  |      |   |
| 59.5165700787256    | 125   | 150 | 0     |  | Open | ; |
| 32369               | 21750 |     | 21751 |  |      |   |
| 59.516870283906 75  |       | 150 | 0     |  | Open | ; |
| 32370               | 21636 |     | 22368 |  |      |   |
| 59.5935754420194    | 160   | 150 | 0     |  | Open | ; |
| 32371               | 21772 |     | 19932 |  |      |   |

|                     |       |     |       |      |   |
|---------------------|-------|-----|-------|------|---|
| 59.5964185407514    | 100   | 140 | 0     | Open | ; |
| 32372               | 23663 |     | 23664 |      |   |
| 59.6099160019157    | 110   | 150 | 0     | Open | ; |
| 32373               | 24203 |     | 23909 |      |   |
| 59.6318671183045    | 100   | 136 | 0     | Open | ; |
| 32374               | 19237 |     | 19111 |      |   |
| 59.639765134443 125 |       | 150 | 0     | Open | ; |
| 32375               | 23845 |     | 23846 |      |   |
| 59.7523905006353    | 75    | 150 | 0     | Open | ; |
| 32376               | 21674 |     | 21675 |      |   |
| 59.7923239434346    | 75    | 150 | 0     | Open | ; |
| 32377               | 22644 |     | 22309 |      |   |
| 59.7948934467033    | 110   | 150 | 0     | Open | ; |
| 32378               | 18548 |     | 20170 |      |   |
| 59.8399981634546    | 110   | 150 | 0     | Open | ; |
| 32380               | 23432 |     | 23356 |      |   |
| 59.0706593675184    | 200   | 150 | 0     | Open | ; |
| 32381               | 18684 |     | 18685 |      |   |
| 59.9653749207119    | 100   | 140 | 0     | Open | ; |
| 32382               | 18484 |     | 21311 |      |   |
| 59.9976887776569    | 110   | 150 | 0     | Open | ; |
| 32383               | 24182 |     | 24273 |      |   |
| 62.1258581063775    | 110   | 150 | 0     | Open | ; |
| 32384               | 22547 |     | 20152 |      |   |
| 59.995598039322 75  |       | 140 | 0     | Open | ; |
| 32385               | 23071 |     | 23072 |      |   |
| 59.9965922629039    | 75    | 150 | 0     | Open | ; |
| 32386               | 21526 |     | 21527 |      |   |
| 59.9980627559163    | 110   | 150 | 0     | Open | ; |
| 32387               | 21430 |     | 21265 |      |   |
| 60.0008372287408    | 125   | 150 | 0     | Open | ; |
| 32388               | 21263 |     | 19451 |      |   |
| 60.001064413311 100 |       | 140 | 0     | Open | ; |
| 32389               | 22287 |     | 22288 |      |   |
| 60.1177996104283    | 110   | 150 | 0     | Open | ; |
| 32390               | 24992 |     | 20258 |      |   |
| 60.1312586729066    | 125   | 150 | 0     | Open | ; |
| 32391               | 21260 |     | 24380 |      |   |
| 60.1449385162453    | 150   | 140 | 0     | Open | ; |
| 32392               | 20800 |     | 20549 |      |   |
| 60.1662920073661    | 110   | 150 | 0     | Open | ; |
| 32393               | 20159 |     | 18973 |      |   |
| 82.434409044875 75  |       | 140 | 0     | Open | ; |
| 32394               | 22810 |     | 21887 |      |   |
| 74.4445484421841    | 110   | 150 | 0     | Open | ; |
| 32395               | 19207 |     | 23348 |      |   |
| 60.5475013385534    | 110   | 150 | 0     | Open | ; |
| 32396               | 23551 |     | 23707 |      |   |
| 60.4564811948709    | 75    | 150 | 0     | Open | ; |
| 32397               | 18983 |     | 25149 |      |   |

|                    |       |     |       |      |   |
|--------------------|-------|-----|-------|------|---|
| 80.3136023536842   | 75    | 150 | 0     | Open | ; |
| 32398              | 18750 |     | 18752 |      |   |
| 60.5970239376344   | 100   | 140 | 0     | Open | ; |
| 32399              | 20481 |     | 20653 |      |   |
| 60.6120760660141   | 110   | 150 | 0     | Open | ; |
| 32400              | 20254 |     | 18762 |      |   |
| 60.6388591598562   | 250   | 100 | 0     | Open | ; |
| 32401              | 25678 |     | 19784 |      |   |
| 79.1563950100203   | 110   | 150 | 0     | Open | ; |
| 32402              | 22334 |     | 22609 |      |   |
| 60.8630706845641   | 75    | 150 | 0     | Open | ; |
| 32403              | 18600 |     | 18601 |      |   |
| 62.3838097399235   | 200   | 150 | 0     | Open | ; |
| 32404              | 24773 |     | 19378 |      |   |
| 60.9784874059914   | 110   | 150 | 0     | Open | ; |
| 32405              | 20789 |     | 23980 |      |   |
| 60.9925839436322   | 75    | 150 | 0     | Open | ; |
| 32406              | 19267 |     | 19268 |      |   |
| 60.9964212748701   | 75    | 150 | 0     | Open | ; |
| 32407              | 23713 |     | 23192 |      |   |
| 60.9964706059937   | 75    | 140 | 0     | Open | ; |
| 32408              | 20165 |     | 20166 |      |   |
| 60.996522739218 75 |       | 150 | 0     | Open | ; |
| 32409              | 23120 |     | 24056 |      |   |
| 60.9971464751591   | 100   | 140 | 0     | Open | ; |
| 32410              | 21743 |     | 21744 |      |   |
| 60.9997757199402   | 75    | 150 | 0     | Open | ; |
| 32411              | 23184 |     | 24443 |      |   |
| 61.0066249999722   | 110   | 150 | 0     | Open | ; |
| 32412              | 21015 |     | 23767 |      |   |
| 61.023875100592 75 |       | 150 | 0     | Open | ; |
| 32413              | 18939 |     | 18940 |      |   |
| 61.108958364159 75 |       | 150 | 0     | Open | ; |
| 32414              | 23525 |     | 22067 |      |   |
| 61.2252032987512   | 110   | 150 | 0     | Open | ; |
| 32415              | 21208 |     | 21209 |      |   |
| 61.2304916079536   | 75    | 140 | 0     | Open | ; |
| 32416              | 23419 |     | 19739 |      |   |
| 61.2418728892017   | 110   | 150 | 0     | Open | ; |
| 32417              | 21553 |     | 21554 |      |   |
| 61.3367127629701   | 110   | 150 | 0     | Open | ; |
| 32418              | 24070 |     | 23778 |      |   |
| 61.3828002280064   | 110   | 150 | 0     | Open | ; |
| 32419              | 19855 |     | 23240 |      |   |
| 61.40493890289 110 |       | 150 | 0     | Open | ; |
| 32420              | 21443 |     | 21444 |      |   |
| 61.4962954894317   | 110   | 150 | 0     | Open | ; |
| 32421              | 21897 |     | 21898 |      |   |
| 61.6061599677611   | 110   | 150 | 0     | Open | ; |
| 32422              | 23927 |     | 24017 |      |   |

|                  |       |     |       |      |   |
|------------------|-------|-----|-------|------|---|
| 61.6172888388066 | 75    | 150 | 0     | Open | ; |
| 32423            | 18784 |     | 18481 |      |   |
| 62.5446556395959 | 110   | 150 | 0     | Open | ; |
| 32424            | 21330 |     | 23010 |      |   |
| 61.6917717318128 | 75    | 140 | 0     | Open | ; |
| 32425            | 23978 |     | 23970 |      |   |
| 61.7154297567565 | 75    | 140 | 0     | Open | ; |
| 32426            | 24887 |     | 24888 |      |   |
| 61.7121235633653 | 110   | 150 | 0     | Open | ; |
| 32427            | 18686 |     | 18682 |      |   |
| 61.7330755957477 | 100   | 140 | 0     | Open | ; |
| 32428            | 19780 |     | 19781 |      |   |
| 86.9767938408944 | 75    | 140 | 0     | Open | ; |
| 32429            | 24879 |     | 24877 |      |   |
| 61.7940224759183 | 110   | 150 | 0     | Open | ; |
| 32430            | 24659 |     | 24504 |      |   |
| 61.8004006266472 | 110   | 150 | 0     | Open | ; |
| 32431            | 23533 |     | 19653 |      |   |
| 61.8206636442347 | 100   | 140 | 0     | Open | ; |
| 32432            | 18596 |     | 22008 |      |   |
| 86.7871619640582 | 140   | 150 | 0     | Open | ; |
| 32433            | 24792 |     | 24514 |      |   |
| 85.6738209125361 | 110   | 150 | 0     | Open | ; |
| 32434            | 21574 |     | 19725 |      |   |
| 61.9966467629791 | 100   | 140 | 0     | Open | ; |
| 32435            | 18756 |     | 18757 |      |   |
| 61.9822155210335 | 100   | 140 | 0     | Open | ; |
| 32436            | 21845 |     | 21846 |      |   |
| 61.9834864862809 | 110   | 150 | 0     | Open | ; |
| 32437            | 23548 |     | 23549 |      |   |
| 61.9964172614204 | 75    | 140 | 0     | Open | ; |
| 32438            | 20430 |     | 21766 |      |   |
| 61.9982544929129 | 125   | 140 | 0     | Open | ; |
| 32439            | 22005 |     | 21367 |      |   |
| 62.2028963329497 | 100   | 140 | 0     | Open | ; |
| 32440            | 20431 |     | 19928 |      |   |
| 62.2068595743626 | 110   | 150 | 0     | Open | ; |
| 32441            | 21690 |     | 22545 |      |   |
| 62.3170159559654 | 100   | 140 | 0     | Open | ; |
| 32442            | 24648 |     | 22152 |      |   |
| 62.382154834083  | 160   | 150 | 0     | Open | ; |
| 32443            | 20926 |     | 20062 |      |   |
| 76.2973052285733 | 75    | 140 | 0     | Open | ; |
| 32444            | 18898 |     | 23190 |      |   |
| 62.4443338665522 | 160   | 150 | 0     | Open | ; |
| 32445            | 21082 |     | 19235 |      |   |
| 62.5595830071274 | 110   | 150 | 0     | Open | ; |
| 32446            | 19370 |     | 19371 |      |   |
| 62.7085789409735 | 100   | 140 | 0     | Open | ; |
| 32447            | 21884 |     | 21314 |      |   |

|                     |       |     |       |      |   |
|---------------------|-------|-----|-------|------|---|
| 62.714810073659 110 |       | 150 | 0     | Open | ; |
| 32448               | 24434 |     | 24449 |      |   |
| 62.728663421145 110 |       | 150 | 0     | Open | ; |
| 32449               | 24741 |     | 24742 |      |   |
| 62.7869562937184    | 110   | 150 | 0     | Open | ; |
| 32450               | 18527 |     | 22539 |      |   |
| 62.7946981331183    | 160   | 150 | 0     | Open | ; |
| 32451               | 21715 |     | 21716 |      |   |
| 62.8152256758885    | 125   | 140 | 0     | Open | ; |
| 32452               | 24607 |     | 24668 |      |   |
| 62.8646305045506    | 200   | 150 | 0     | Open | ; |
| 32453               | 18550 |     | 18551 |      |   |
| 62.9716227123551    | 300   | 140 | 0     | Open | ; |
| 32454               | 21636 |     | 21638 |      |   |
| 62.9964086536781    | 160   | 150 | 0     | Open | ; |
| 32455               | 23513 |     | 23796 |      |   |
| 62.9962773859936    | 125   | 150 | 0     | Open | ; |
| 32456               | 22258 |     | 22259 |      |   |
| 62.9963983241408    | 110   | 150 | 0     | Open | ; |
| 32457               | 19968 |     | 19969 |      |   |
| 62.996405582878 75  |       | 150 | 0     | Open | ; |
| 32458               | 18485 |     | 19965 |      |   |
| 62.9964081341541    | 75    | 150 | 0     | Open | ; |
| 32459               | 22075 |     | 20529 |      |   |
| 62.9965051921297    | 110   | 150 | 0     | Open | ; |
| 32460               | 20893 |     | 22827 |      |   |
| 63.1250298981017    | 200   | 140 | 0     | Open | ; |
| 32461               | 22550 |     | 24109 |      |   |
| 63.1446931198323    | 110   | 150 | 0     | Open | ; |
| 32462               | 19768 |     | 19769 |      |   |
| 63.1537542460496    | 125   | 140 | 0     | Open | ; |
| 32463               | 20855 |     | 23352 |      |   |
| 63.2298878640789    | 150   | 140 | 0     | Open | ; |
| 32464               | 20748 |     | 18956 |      |   |
| 63.2667231508881    | 110   | 150 | 0     | Open | ; |
| 32465               | 22630 |     | 22631 |      |   |
| 63.3571510345296    | 110   | 150 | 0     | Open | ; |
| 32466               | 23467 |     | 23468 |      |   |
| 63.5074292767311    | 75    | 140 | 0     | Open | ; |
| 32467               | 19942 |     | 20216 |      |   |
| 63.5489057543541    | 100   | 140 | 0     | Open | ; |
| 32468               | 24007 |     | 21005 |      |   |
| 63.5835179082967    | 75    | 150 | 0     | Open | ; |
| 32469               | 22455 |     | 22434 |      |   |
| 63.7355634272474    | 110   | 150 | 0     | Open | ; |
| 32470               | 19604 |     | 22466 |      |   |
| 63.7507625447326    | 110   | 150 | 0     | Open | ; |
| 32471               | 19606 |     | 20311 |      |   |
| 63.7533631018348    | 110   | 150 | 0     | Open | ; |
| 32472               | 24752 |     | 24723 |      |   |

|                     |       |     |       |      |   |
|---------------------|-------|-----|-------|------|---|
| 63.7637383194536    | 140   | 150 | 0     | Open | ; |
| 32473               | 23888 |     | 23889 |      |   |
| 63.7647852408918    | 75    | 140 | 0     | Open | ; |
| 32474               | 21475 |     | 19741 |      |   |
| 63.9365516441229    | 160   | 150 | 0     | Open | ; |
| 32475               | 18615 |     | 25033 |      |   |
| 71.2220921635812    | 75    | 150 | 0     | Open | ; |
| 32476               | 22836 |     | 23137 |      |   |
| 90.128231003858 100 |       | 140 | 0     | Open | ; |
| 32477               | 20912 |     | 23746 |      |   |
| 70.7471259786505    | 250   | 140 | 0     | Open | ; |
| 32478               | 20204 |     | 20205 |      |   |
| 63.9137835586864    | 75    | 140 | 0     | Open | ; |
| 32479               | 23517 |     | 21004 |      |   |
| 63.9532426644738    | 75    | 150 | 0     | Open | ; |
| 32480               | 19883 |     | 19194 |      |   |
| 63.973785953901 75  |       | 140 | 0     | Open | ; |
| 32481               | 21169 |     | 21499 |      |   |
| 221.88189640312 110 |       | 150 | 0     | Open | ; |
| 32482               | 20083 |     | 20084 |      |   |
| 63.9917210757713    | 75    | 150 | 0     | Open | ; |
| 32483               | 23988 |     | 20521 |      |   |
| 63.9927954056061    | 75    | 150 | 0     | Open | ; |
| 32484               | 22985 |     | 20523 |      |   |
| 63.9958964802974    | 75    | 150 | 0     | Open | ; |
| 32485               | 21564 |     | 21565 |      |   |
| 63.9962001230649    | 75    | 140 | 0     | Open | ; |
| 32486               | 20181 |     | 20182 |      |   |
| 63.9962151938398    | 110   | 150 | 0     | Open | ; |
| 32487               | 23408 |     | 19262 |      |   |
| 63.9962446308502    | 110   | 150 | 0     | Open | ; |
| 32488               | 23376 |     | 23377 |      |   |
| 63.9962717025304    | 75    | 150 | 0     | Open | ; |
| 32489               | 23296 |     | 23297 |      |   |
| 63.9962720729251    | 110   | 150 | 0     | Open | ; |
| 32490               | 18837 |     | 23307 |      |   |
| 63.9962822624382    | 110   | 150 | 0     | Open | ; |
| 32491               | 19264 |     | 22051 |      |   |
| 63.9963017402048    | 75    | 150 | 0     | Open | ; |
| 32492               | 23836 |     | 23632 |      |   |
| 63.9964375394212    | 110   | 150 | 0     | Open | ; |
| 32493               | 22131 |     | 23584 |      |   |
| 63.9965691294743    | 100   | 140 | 0     | Open | ; |
| 32494               | 22987 |     | 19526 |      |   |
| 63.9966979619896    | 75    | 140 | 0     | Open | ; |
| 32495               | 24658 |     | 24659 |      |   |
| 63.9999919270082    | 110   | 150 | 0     | Open | ; |
| 32496               | 22095 |     | 22096 |      |   |
| 64.0149829362059    | 110   | 150 | 0     | Open | ; |
| 32497               | 24751 |     | 24730 |      |   |

|                    |       |     |       |      |   |
|--------------------|-------|-----|-------|------|---|
| 64.1360166462255   | 110   | 150 | 0     | Open | ; |
| 32498              | 24778 |     | 24775 |      |   |
| 64.1682740717684   | 110   | 150 | 0     | Open | ; |
| 32499              | 21975 |     | 21976 |      |   |
| 64.1928003186073   | 150   | 140 | 0     | Open | ; |
| 32500              | 18754 |     | 18750 |      |   |
| 64.4336182753149   | 100   | 140 | 0     | Open | ; |
| 32501              | 19141 |     | 19142 |      |   |
| 64.2315531679407   | 75    | 140 | 0     | Open | ; |
| 32502              | 21164 |     | 19933 |      |   |
| 64.2698974387372   | 150   | 140 | 0     | Open | ; |
| 32503              | 22797 |     | 21363 |      |   |
| 64.2678425913648   | 75    | 140 | 0     | Open | ; |
| 32504              | 18975 |     | 19485 |      |   |
| 64.2725965537305   | 100   | 140 | 0     | Open | ; |
| 32505              | 22799 |     | 23572 |      |   |
| 64.3088508962219   | 100   | 140 | 0     | Open | ; |
| 32506              | 19894 |     | 18663 |      |   |
| 64.3772201102753   | 200   | 140 | 0     | Open | ; |
| 32507              | 20445 |     | 22085 |      |   |
| 64.4528011474173   | 110   | 150 | 0     | Open | ; |
| 32508              | 21000 |     | 21001 |      |   |
| 64.4980076656585   | 200   | 150 | 0     | Open | ; |
| 32509              | 23660 |     | 19474 |      |   |
| 64.5533076362597   | 100   | 140 | 0     | Open | ; |
| 32510              | 21354 |     | 21697 |      |   |
| 89.4550379874664   | 110   | 150 | 0     | Open | ; |
| 32511              | 19380 |     | 22058 |      |   |
| 64.6020505318823   | 100   | 140 | 0     | Open | ; |
| 32512              | 23155 |     | 24621 |      |   |
| 64.6632710958075   | 110   | 150 | 0     | Open | ; |
| 32513              | 19034 |     | 19464 |      |   |
| 91.5274773426937   | 75    | 140 | 0     | Open | ; |
| 32514              | 23898 |     | 19747 |      |   |
| 86.7772225033985   | 75    | 140 | 0     | Open | ; |
| 32515              | 20680 |     | 20681 |      |   |
| 64.8961262440889   | 75    | 150 | 0     | Open | ; |
| 32516              | 22502 |     | 19748 |      |   |
| 64.980282461176 75 |       | 140 | 0     | Open | ; |
| 32517              | 19445 |     | 19446 |      |   |
| 64.9884350026116   | 75    | 140 | 0     | Open | ; |
| 32518              | 21837 |     | 21832 |      |   |
| 64.9910496226317   | 75    | 140 | 0     | Open | ; |
| 32519              | 22457 |     | 19747 |      |   |
| 64.9961755839226   | 75    | 140 | 0     | Open | ; |
| 32520              | 23799 |     | 21911 |      |   |
| 64.9962943828753   | 110   | 150 | 0     | Open | ; |
| 32521              | 23970 |     | 20015 |      |   |
| 64.9963349689397   | 75    | 140 | 0     | Open | ; |
| 32522              | 23893 |     | 23894 |      |   |



|                  |       |     |       |      |   |
|------------------|-------|-----|-------|------|---|
| 64.9974215549978 | 110   | 150 | 0     | Open | ; |
| 32523            | 18480 |     | 21917 |      |   |
| 65.0151519633748 | 140   | 150 | 0     | Open | ; |
| 32524            | 19483 |     | 19484 |      |   |
| 65.0689964116333 | 75    | 140 | 0     | Open | ; |
| 32525            | 21330 |     | 21331 |      |   |
| 65.0703121892588 | 75    | 140 | 0     | Open | ; |
| 32526            | 22645 |     | 22436 |      |   |
| 65.1476884039143 | 110   | 150 | 0     | Open | ; |
| 32527            | 19825 |     | 19826 |      |   |
| 65.2508460723557 | 75    | 150 | 0     | Open | ; |
| 32528            | 22958 |     | 22960 |      |   |
| 65.320200896535  | 110   | 150 | 0     | Open | ; |
| 32529            | 22995 |     | 20133 |      |   |
| 65.3526871069373 | 150   | 140 | 0     | Open | ; |
| 32530            | 22552 |     | 19647 |      |   |
| 65.5133346449424 | 125   | 140 | 0     | Open | ; |
| 32531            | 21293 |     | 21294 |      |   |
| 65.5385745711447 | 75    | 140 | 0     | Open | ; |
| 32532            | 19160 |     | 19161 |      |   |
| 65.9962779486664 | 75    | 150 | 0     | Open | ; |
| 32533            | 21274 |     | 21275 |      |   |
| 65.6664593215551 | 75    | 140 | 0     | Open | ; |
| 32534            | 18621 |     | 20026 |      |   |
| 65.7255127272146 | 150   | 140 | 0     | Open | ; |
| 32535            | 24418 |     | 25159 |      |   |
| 67.3473631869948 | 110   | 150 | 0     | Open | ; |
| 32536            | 21347 |     | 23417 |      |   |
| 65.9962579007664 | 75    | 140 | 0     | Open | ; |
| 32537            | 23657 |     | 23658 |      |   |
| 65.9451336933084 | 110   | 150 | 0     | Open | ; |
| 32538            | 22494 |     | 22311 |      |   |
| 65.9810588639091 | 110   | 150 | 0     | Open | ; |
| 32539            | 21685 |     | 21686 |      |   |
| 65.9877872027446 | 75    | 150 | 0     | Open | ; |
| 32540            | 18913 |     | 18914 |      |   |
| 65.9955422824276 | 250   | 140 | 0     | Open | ; |
| 32541            | 18670 |     | 18671 |      |   |
| 65.9962218186778 | 160   | 150 | 0     | Open | ; |
| 32542            | 18682 |     | 18683 |      |   |
| 65.9963171070762 | 100   | 140 | 0     | Open | ; |
| 32543            | 19213 |     | 21250 |      |   |
| 65.9963353123748 | 160   | 150 | 0     | Open | ; |
| 32544            | 19820 |     | 19185 |      |   |
| 65.9981013710197 | 110   | 150 | 0     | Open | ; |
| 32545            | 22895 |     | 20030 |      |   |
| 66.008625914737  | 75    | 140 | 0     | Open | ; |
| 32546            | 21577 |     | 21578 |      |   |
| 66.0533726237804 | 250   | 140 | 0     | Open | ; |
| 32547            | 24674 |     | 24675 |      |   |

|                     |       |     |       |      |   |
|---------------------|-------|-----|-------|------|---|
| 66.1059641315974    | 110   | 150 | 0     | Open | ; |
| 32548               | 24398 |     | 24400 |      |   |
| 66.1268397705766    | 110   | 150 | 0     | Open | ; |
| 32549               | 18869 |     | 18870 |      |   |
| 66.2195519605801    | 75    | 140 | 0     | Open | ; |
| 32550               | 22967 |     | 23979 |      |   |
| 66.3402650253631    | 110   | 150 | 0     | Open | ; |
| 32551               | 24388 |     | 18756 |      |   |
| 66.5730737786033    | 100   | 140 | 0     | Open | ; |
| 32552               | 23451 |     | 25070 |      |   |
| 93.2704382469099    | 110   | 150 | 0     | Open | ; |
| 32553               | 22121 |     | 22751 |      |   |
| 66.7020249038822    | 100   | 140 | 0     | Open | ; |
| 32554               | 24535 |     | 19578 |      |   |
| 66.7097065858833    | 110   | 150 | 0     | Open | ; |
| 32555               | 24676 |     | 24677 |      |   |
| 66.7266498644154    | 110   | 150 | 0     | Open | ; |
| 32556               | 19241 |     | 25707 |      |   |
| 66.7818879196085    | 250   | 140 | 0     | Open | ; |
| 32557               | 24469 |     | 24470 |      |   |
| 66.8368104124301    | 110   | 150 | 0     | Open | ; |
| 32558               | 22598 |     | 22871 |      |   |
| 92.5819692595801    | 160   | 150 | 0     | Open | ; |
| 32559               | 21110 |     | 22140 |      |   |
| 66.9642038436066    | 160   | 150 | 0     | Open | ; |
| 32560               | 21055 |     | 23256 |      |   |
| 66.9963284753375    | 100   | 140 | 0     | Open | ; |
| 32561               | 23756 |     | 23757 |      |   |
| 66.996206207235 100 |       | 140 | 0     | Open | ; |
| 32562               | 20994 |     | 24145 |      |   |
| 66.9960642861807    | 100   | 140 | 0     | Open | ; |
| 32563               | 21789 |     | 21790 |      |   |
| 66.9963174906276    | 75    | 140 | 0     | Open | ; |
| 32564               | 21709 |     | 21710 |      |   |
| 66.9969089591445    | 75    | 140 | 0     | Open | ; |
| 32565               | 23754 |     | 23755 |      |   |
| 66.9971972692871    | 150   | 140 | 0     | Open | ; |
| 32566               | 22492 |     | 20784 |      |   |
| 67.0469003010003    | 110   | 150 | 0     | Open | ; |
| 32567               | 21059 |     | 19025 |      |   |
| 67.0735591949028    | 75    | 150 | 0     | Open | ; |
| 32568               | 24978 |     | 23471 |      |   |
| 68.4385837992484    | 110   | 150 | 0     | Open | ; |
| 32569               | 20198 |     | 20200 |      |   |
| 67.1173877606788    | 75    | 150 | 0     | Open | ; |
| 32570               | 22229 |     | 22554 |      |   |
| 67.2624794304236    | 75    | 150 | 0     | Open | ; |
| 32571               | 22769 |     | 19002 |      |   |
| 67.3927688459553    | 75    | 150 | 0     | Open | ; |
| 32572               | 20819 |     | 20113 |      |   |

|                  |       |     |       |      |   |
|------------------|-------|-----|-------|------|---|
| 94.5837405694725 | 75    | 150 | 0     | Open | ; |
| 32573            | 22925 |     | 22442 |      |   |
| 67.4894877934715 | 75    | 140 | 0     | Open | ; |
| 32574            | 20491 |     | 22367 |      |   |
| 67.4960814682991 | 75    | 150 | 0     | Open | ; |
| 32575            | 19100 |     | 19101 |      |   |
| 67.4967385905206 | 75    | 150 | 0     | Open | ; |
| 32576            | 23621 |     | 23897 |      |   |
| 67.5597321124902 | 110   | 150 | 0     | Open | ; |
| 32577            | 19201 |     | 19013 |      |   |
| 67.6223122269924 | 75    | 150 | 0     | Open | ; |
| 32578            | 24405 |     | 24417 |      |   |
| 67.6436784564336 | 160   | 150 | 0     | Open | ; |
| 32579            | 20229 |     | 20230 |      |   |
| 67.653306205622  | 75    | 150 | 0     | Open | ; |
| 32580            | 23165 |     | 24662 |      |   |
| 67.7025089900302 | 110   | 150 | 0     | Open | ; |
| 32581            | 20070 |     | 20071 |      |   |
| 67.7444304071574 | 75    | 150 | 0     | Open | ; |
| 32582            | 20796 |     | 22710 |      |   |
| 67.8316030948886 | 75    | 150 | 0     | Open | ; |
| 32583            | 20287 |     | 20288 |      |   |
| 67.8894505840063 | 110   | 150 | 0     | Open | ; |
| 32584            | 22995 |     | 19525 |      |   |
| 87.9059186662614 | 75    | 140 | 0     | Open | ; |
| 32585            | 20868 |     | 22733 |      |   |
| 67.9823870881497 | 100   | 140 | 0     | Open | ; |
| 32586            | 18771 |     | 18772 |      |   |
| 67.9916711692228 | 75    | 140 | 0     | Open | ; |
| 32587            | 20017 |     | 20018 |      |   |
| 67.9920402458636 | 100   | 140 | 0     | Open | ; |
| 32588            | 18769 |     | 18770 |      |   |
| 67.995929114937  | 75    | 140 | 0     | Open | ; |
| 32589            | 20973 |     | 20974 |      |   |
| 67.9960092669853 | 75    | 150 | 0     | Open | ; |
| 32590            | 21183 |     | 21184 |      |   |
| 67.9960092673146 | 75    | 150 | 0     | Open | ; |
| 32591            | 23829 |     | 23830 |      |   |
| 67.9960092677531 | 75    | 150 | 0     | Open | ; |
| 32592            | 20975 |     | 20976 |      |   |
| 67.9960092669976 | 75    | 150 | 0     | Open | ; |
| 32593            | 20971 |     | 20972 |      |   |
| 67.9960092673031 | 75    | 150 | 0     | Open | ; |
| 32594            | 23630 |     | 23631 |      |   |
| 67.9960092671618 | 75    | 150 | 0     | Open | ; |
| 32595            | 23932 |     | 23933 |      |   |
| 67.9960461380728 | 75    | 150 | 0     | Open | ; |
| 32596            | 18680 |     | 18681 |      |   |
| 67.9960892348137 | 75    | 150 | 0     | Open | ; |
| 32597            | 23931 |     | 22665 |      |   |

|                  |       |     |       |      |   |
|------------------|-------|-----|-------|------|---|
| 67.9961168986927 | 75    | 150 | 0     | Open | ; |
| 32598            | 21666 |     | 18913 |      |   |
| 67.9961872762535 | 250   | 140 | 0     | Open | ; |
| 32599            | 23672 |     | 23673 |      |   |
| 68.0106917131212 | 75    | 140 | 0     | Open | ; |
| 32600            | 23714 |     | 23715 |      |   |
| 68.0157722405336 | 75    | 150 | 0     | Open | ; |
| 32601            | 21960 |     | 19497 |      |   |
| 68.0269533206202 | 75    | 150 | 0     | Open | ; |
| 32602            | 23454 |     | 23455 |      |   |
| 68.0418938538342 | 110   | 150 | 0     | Open | ; |
| 32603            | 21711 |     | 21712 |      |   |
| 68.1036157991701 | 75    | 140 | 0     | Open | ; |
| 32604            | 23315 |     | 23934 |      |   |
| 71.9923929680173 | 125   | 150 | 0     | Open | ; |
| 32605            | 23748 |     | 24498 |      |   |
| 68.1927125936381 | 100   | 140 | 0     | Open | ; |
| 32606            | 23105 |     | 23106 |      |   |
| 68.2028993527174 | 110   | 150 | 0     | Open | ; |
| 32607            | 21724 |     | 21725 |      |   |
| 68.2156117721038 | 125   | 140 | 0     | Open | ; |
| 32608            | 21259 |     | 21260 |      |   |
| 68.2368100322647 | 150   | 140 | 0     | Open | ; |
| 32609            | 23191 |     | 22338 |      |   |
| 123.407328076689 | 75    | 150 | 0     | Open | ; |
| 32610            | 22563 |     | 19688 |      |   |
| 68.6535251870919 | 75    | 140 | 0     | Open | ; |
| 32611            | 21266 |     | 20141 |      |   |
| 165.390562771754 | 110   | 150 | 0     | Open | ; |
| 32612            | 23192 |     | 20503 |      |   |
| 68.996003397566  | 75    | 140 | 0     | Open | ; |
| 32613            | 21795 |     | 20215 |      |   |
| 68.7361007093096 | 75    | 140 | 0     | Open | ; |
| 32614            | 18953 |     | 20851 |      |   |
| 68.7641142365002 | 110   | 150 | 0     | Open | ; |
| 32615            | 20806 |     | 22882 |      |   |
| 68.8070100520942 | 125   | 150 | 0     | Open | ; |
| 32616            | 21498 |     | 21499 |      |   |
| 68.8947726915811 | 110   | 150 | 0     | Open | ; |
| 32617            | 21202 |     | 21203 |      |   |
| 68.9173108728673 | 125   | 150 | 0     | Open | ; |
| 32618            | 24104 |     | 23864 |      |   |
| 78.2072802262529 | 110   | 150 | 0     | Open | ; |
| 32619            | 22493 |     | 20783 |      |   |
| 68.9782210857408 | 110   | 150 | 0     | Open | ; |
| 32620            | 20343 |     | 20344 |      |   |
| 68.9868901297367 | 110   | 150 | 0     | Open | ; |
| 32621            | 18647 |     | 24321 |      |   |
| 68.9960785985562 | 75    | 140 | 0     | Open | ; |
| 32622            | 25140 |     | 25141 |      |   |

|                  |       |     |       |      |   |
|------------------|-------|-----|-------|------|---|
| 68.9999217066199 | 110   | 150 | 0     | Open | ; |
| 32623            | 20991 |     | 22953 |      |   |
| 68.9959847986599 | 125   | 140 | 0     | Open | ; |
| 32624            | 21449 |     | 23237 |      |   |
| 68.9960759976048 | 100   | 140 | 0     | Open | ; |
| 32625            | 18572 |     | 25055 |      |   |
| 68.9972740513225 | 110   | 150 | 0     | Open | ; |
| 32626            | 18513 |     | 21948 |      |   |
| 69.0115197484358 | 450   | 100 | 0     | Open | ; |
| 32627            | 20563 |     | 20690 |      |   |
| 69.0362359628922 | 110   | 150 | 0     | Open | ; |
| 32628            | 24448 |     | 24705 |      |   |
| 69.1279111676362 | 110   | 150 | 0     | Open | ; |
| 32629            | 20392 |     | 20390 |      |   |
| 69.2309468593935 | 200   | 150 | 0     | Open | ; |
| 32630            | 22539 |     | 20805 |      |   |
| 69.8185267516839 | 160   | 150 | 0     | Open | ; |
| 32631            | 21121 |     | 24601 |      |   |
| 69.4967595096849 | 100   | 140 | 0     | Open | ; |
| 32632            | 19740 |     | 22637 |      |   |
| 69.479823948328  | 110   | 150 | 0     | Open | ; |
| 32633            | 24501 |     | 24651 |      |   |
| 69.5123549381838 | 110   | 150 | 0     | Open | ; |
| 32634            | 24755 |     | 24757 |      |   |
| 69.5224022273727 | 110   | 150 | 0     | Open | ; |
| 32635            | 22337 |     | 23191 |      |   |
| 69.5454508512424 | 125   | 150 | 0     | Open | ; |
| 32636            | 22603 |     | 22315 |      |   |
| 69.5731807471791 | 110   | 150 | 0     | Open | ; |
| 32637            | 20691 |     | 20070 |      |   |
| 69.615356795759  | 75    | 150 | 0     | Open | ; |
| 32638            | 20979 |     | 19839 |      |   |
| 69.6887416370227 | 75    | 140 | 0     | Open | ; |
| 32639            | 21584 |     | 21578 |      |   |
| 69.6923478592258 | 250   | 140 | 0     | Open | ; |
| 32640            | 20438 |     | 24386 |      |   |
| 98.0270304208617 | 100   | 140 | 0     | Open | ; |
| 32641            | 23043 |     | 23996 |      |   |
| 69.9016645887087 | 75    | 150 | 0     | Open | ; |
| 32642            | 22301 |     | 20774 |      |   |
| 69.9246328770889 | 110   | 150 | 0     | Open | ; |
| 32643            | 22368 |     | 22485 |      |   |
| 80.9661920631982 | 160   | 150 | 0     | Open | ; |
| 32644            | 23531 |     | 23532 |      |   |
| 69.9959209750013 | 110   | 150 | 0     | Open | ; |
| 32645            | 21376 |     | 21377 |      |   |
| 69.995946987789  | 110   | 150 | 0     | Open | ; |
| 32646            | 24244 |     | 22895 |      |   |
| 69.9960162989223 | 75    | 140 | 0     | Open | ; |
| 32647            | 20008 |     | 21668 |      |   |

|                     |       |     |       |      |   |
|---------------------|-------|-----|-------|------|---|
| 69.9960193262199    | 75    | 150 | 0     | Open | ; |
| 32648               | 20865 |     | 22517 |      |   |
| 69.9960346397452    | 100   | 140 | 0     | Open | ; |
| 32649               | 22063 |     | 22064 |      |   |
| 69.9961819664079    | 100   | 140 | 0     | Open | ; |
| 32650               | 21317 |     | 21318 |      |   |
| 70.0064437293484    | 75    | 140 | 0     | Open | ; |
| 32651               | 22658 |     | 21789 |      |   |
| 70.0174022227778    | 75    | 150 | 0     | Open | ; |
| 32652               | 19936 |     | 19937 |      |   |
| 70.018170123745 150 |       | 140 | 0     | Open | ; |
| 32653               | 19098 |     | 19099 |      |   |
| 70.0639772474975    | 75    | 150 | 0     | Open | ; |
| 32654               | 24051 |     | 20393 |      |   |
| 146.675307055296    | 110   | 150 | 0     | Open | ; |
| 32655               | 24432 |     | 24433 |      |   |
| 70.1950810937861    | 110   | 150 | 0     | Open | ; |
| 32656               | 24929 |     | 24930 |      |   |
| 70.208733747494 110 |       | 150 | 0     | Open | ; |
| 32657               | 21570 |     | 18628 |      |   |
| 70.2344600245404    | 75    | 140 | 0     | Open | ; |
| 32658               | 22535 |     | 23212 |      |   |
| 70.3440630929719    | 226   | 150 | 0     | Open | ; |
| 32659               | 24235 |     | 24301 |      |   |
| 70.3866297580698    | 110   | 150 | 0     | Open | ; |
| 32660               | 24949 |     | 24950 |      |   |
| 79.8729809265415    | 75    | 150 | 0     | Open | ; |
| 32661               | 23956 |     | 23084 |      |   |
| 70.4385683416505    | 100   | 140 | 0     | Open | ; |
| 32662               | 23935 |     | 19820 |      |   |
| 92.9924496980021    | 110   | 150 | 0     | Open | ; |
| 32663               | 23060 |     | 23061 |      |   |
| 70.4964994203453    | 75    | 150 | 0     | Open | ; |
| 32664               | 22656 |     | 23628 |      |   |
| 70.5748620400922    | 75    | 150 | 0     | Open | ; |
| 32665               | 24665 |     | 24595 |      |   |
| 79.2653284936024    | 200   | 150 | 0     | Open | ; |
| 32666               | 24648 |     | 23820 |      |   |
| 70.5960307906835    | 110   | 150 | 0     | Open | ; |
| 32667               | 21704 |     | 24164 |      |   |
| 78.38384614624 140  |       | 150 | 0     | Open | ; |
| 32668               | 23302 |     | 23967 |      |   |
| 70.6453956507432    | 110   | 150 | 0     | Open | ; |
| 32669               | 22806 |     | 20696 |      |   |
| 70.7504977539685    | 110   | 150 | 0     | Open | ; |
| 32670               | 24645 |     | 25683 |      |   |
| 71.3824432590492    | 50    | 140 | 0     | Open | ; |
| 32671               | 24191 |     | 20607 |      |   |
| 70.9519590123049    | 125   | 150 | 0     | Open | ; |
| 32672               | 21014 |     | 22014 |      |   |

|                  |       |     |       |      |   |
|------------------|-------|-----|-------|------|---|
| 70.9953372619772 | 110   | 150 | 0     | Open | ; |
| 32673            | 20014 |     | 20281 |      |   |
| 70.9959837011362 | 450   | 100 | 0     | Open | ; |
| 32674            | 19137 |     | 19138 |      |   |
| 70.9960769635167 | 75    | 140 | 0     | Open | ; |
| 32675            | 21187 |     | 21188 |      |   |
| 70.9961680236813 | 75    | 150 | 0     | Open | ; |
| 32676            | 22341 |     | 20636 |      |   |
| 70.9973737847059 | 150   | 140 | 0     | Open | ; |
| 32677            | 20653 |     | 20957 |      |   |
| 99.1320041125227 | 110   | 150 | 0     | Open | ; |
| 32678            | 23160 |     | 24395 |      |   |
| 74.1423324634172 | 110   | 150 | 0     | Open | ; |
| 32679            | 24869 |     | 24872 |      |   |
| 71.2322111129876 | 110   | 150 | 0     | Open | ; |
| 32680            | 23396 |     | 23397 |      |   |
| 71.2522557536111 | 75    | 150 | 0     | Open | ; |
| 32681            | 24632 |     | 24633 |      |   |
| 71.2549369971701 | 110   | 150 | 0     | Open | ; |
| 32682            | 19224 |     | 21915 |      |   |
| 71.3479511270908 | 75    | 150 | 0     | Open | ; |
| 32683            | 21181 |     | 23502 |      |   |
| 71.4408937718885 | 75    | 150 | 0     | Open | ; |
| 32684            | 21762 |     | 21760 |      |   |
| 71.5051140759079 | 110   | 150 | 0     | Open | ; |
| 32685            | 24737 |     | 24738 |      |   |
| 71.5542555847884 | 110   | 150 | 0     | Open | ; |
| 32686            | 24517 |     | 24518 |      |   |
| 71.5543086403422 | 110   | 150 | 0     | Open | ; |
| 32687            | 24364 |     | 24363 |      |   |
| 95.0867687048479 | 75    | 150 | 0     | Open | ; |
| 32688            | 25002 |     | 25006 |      |   |
| 101.889017880644 | 110   | 150 | 0     | Open | ; |
| 32689            | 23542 |     | 19340 |      |   |
| 71.6364686232877 | 125   | 140 | 0     | Open | ; |
| 32690            | 22358 |     | 22487 |      |   |
| 71.6384506145398 | 110   | 150 | 0     | Open | ; |
| 32691            | 23183 |     | 20402 |      |   |
| 71.7811437493182 | 200   | 150 | 0     | Open | ; |
| 32692            | 20861 |     | 23576 |      |   |
| 71.8213615788156 | 100   | 140 | 0     | Open | ; |
| 32693            | 23983 |     | 22363 |      |   |
| 71.8196132963041 | 75    | 150 | 0     | Open | ; |
| 32694            | 21451 |     | 19979 |      |   |
| 101.260565843444 | 75    | 140 | 0     | Open | ; |
| 32695            | 23712 |     | 23577 |      |   |
| 71.8900364939241 | 100   | 140 | 0     | Open | ; |
| 32696            | 19920 |     | 19921 |      |   |
| 71.9198440816861 | 200   | 140 | 0     | Open | ; |
| 32697            | 18639 |     | 18640 |      |   |

|                     |       |     |       |      |   |
|---------------------|-------|-----|-------|------|---|
| 71.9448693660954    | 100   | 140 | 0     | Open | ; |
| 32698               | 24527 |     | 24528 |      |   |
| 71.9928908839773    | 75    | 150 | 0     | Open | ; |
| 32699               | 22599 |     | 23735 |      |   |
| 71.9957959405902    | 110   | 150 | 0     | Open | ; |
| 32700               | 19651 |     | 23618 |      |   |
| 71.9959259876563    | 160   | 150 | 0     | Open | ; |
| 32701               | 19125 |     | 19126 |      |   |
| 71.9959958263665    | 75    | 140 | 0     | Open | ; |
| 32702               | 23456 |     | 23457 |      |   |
| 71.9972482677072    | 75    | 150 | 0     | Open | ; |
| 32703               | 22230 |     | 22231 |      |   |
| 72.0615729951649    | 75    | 150 | 0     | Open | ; |
| 32704               | 19486 |     | 18966 |      |   |
| 72.081092188945 150 |       | 140 | 0     | Open | ; |
| 32705               | 24398 |     | 24399 |      |   |
| 72.3712614280276    | 110   | 150 | 0     | Open | ; |
| 32706               | 24226 |     | 18594 |      |   |
| 72.3352087892154    | 75    | 150 | 0     | Open | ; |
| 32707               | 23867 |     | 24103 |      |   |
| 73.2888206350212    | 110   | 150 | 0     | Open | ; |
| 32708               | 22220 |     | 22361 |      |   |
| 72.3539407783767    | 75    | 150 | 0     | Open | ; |
| 32709               | 22165 |     | 22167 |      |   |
| 72.380956674262 110 |       | 150 | 0     | Open | ; |
| 32710               | 19948 |     | 19949 |      |   |
| 72.4353813847578    | 100   | 140 | 0     | Open | ; |
| 32711               | 19640 |     | 22099 |      |   |
| 73.644129299048 110 |       | 150 | 0     | Open | ; |
| 32712               | 19612 |     | 19614 |      |   |
| 72.5379621418633    | 75    | 150 | 0     | Open | ; |
| 32713               | 22714 |     | 22715 |      |   |
| 72.5431860592596    | 110   | 150 | 0     | Open | ; |
| 32714               | 22718 |     | 22719 |      |   |
| 72.5531418600949    | 200   | 140 | 0     | Open | ; |
| 32715               | 20944 |     | 19026 |      |   |
| 72.5764426528008    | 75    | 150 | 0     | Open | ; |
| 32716               | 23857 |     | 23858 |      |   |
| 72.5984007154508    | 110   | 150 | 0     | Open | ; |
| 32717               | 23420 |     | 23421 |      |   |
| 72.6278386003893    | 110   | 150 | 0     | Open | ; |
| 32718               | 21268 |     | 21202 |      |   |
| 72.636550300444 125 |       | 150 | 0     | Open | ; |
| 32719               | 20966 |     | 19617 |      |   |
| 72.6552934616422    | 75    | 150 | 0     | Open | ; |
| 32720               | 22776 |     | 22777 |      |   |
| 72.6607224769596    | 110   | 150 | 0     | Open | ; |
| 32721               | 20935 |     | 22727 |      |   |
| 72.7143636559972    | 75    | 150 | 0     | Open | ; |
| 32722               | 24044 |     | 22438 |      |   |



|                     |       |     |       |      |   |
|---------------------|-------|-----|-------|------|---|
| 72.8501439714354    | 75    | 150 | 0     | Open | ; |
| 32723               | 19119 |     | 19120 |      |   |
| 72.8845448688075    | 110   | 150 | 0     | Open | ; |
| 32724               | 24615 |     | 24630 |      |   |
| 72.9000288937241    | 110   | 150 | 0     | Open | ; |
| 32725               | 18480 |     | 22169 |      |   |
| 72.9912985672646    | 140   | 150 | 0     | Open | ; |
| 32726               | 23017 |     | 19686 |      |   |
| 73.4544194980553    | 160   | 150 | 0     | Open | ; |
| 32727               | 20745 |     | 19582 |      |   |
| 72.9886450687659    | 75    | 150 | 0     | Open | ; |
| 32728               | 22800 |     | 22686 |      |   |
| 72.9956988422127    | 75    | 140 | 0     | Open | ; |
| 32729               | 22907 |     | 22908 |      |   |
| 67.846590909783 125 |       | 150 | 0     | Open | ; |
| 32730               | 19094 |     | 19095 |      |   |
| 72.9958435324022    | 110   | 150 | 0     | Open | ; |
| 32731               | 20244 |     | 20284 |      |   |
| 73.0043273149121    | 75    | 150 | 0     | Open | ; |
| 32732               | 24690 |     | 23156 |      |   |
| 73.0092248773887    | 110   | 150 | 0     | Open | ; |
| 32733               | 20387 |     | 20653 |      |   |
| 100.967335114333    | 110   | 150 | 0     | Open | ; |
| 32734               | 20805 |     | 24985 |      |   |
| 75.9408507789941    | 160   | 150 | 0     | Open | ; |
| 32735               | 18982 |     | 18980 |      |   |
| 73.216131008663 110 |       | 150 | 0     | Open | ; |
| 32736               | 22801 |     | 22802 |      |   |
| 73.3663857114113    | 75    | 140 | 0     | Open | ; |
| 32737               | 23325 |     | 19256 |      |   |
| 73.4217462356133    | 75    | 140 | 0     | Open | ; |
| 32738               | 20039 |     | 22337 |      |   |
| 73.4332984567152    | 125   | 150 | 0     | Open | ; |
| 32739               | 23022 |     | 22793 |      |   |
| 73.4709501527545    | 110   | 150 | 0     | Open | ; |
| 32740               | 22435 |     | 25029 |      |   |
| 74.6126778614919    | 110   | 150 | 0     | Open | ; |
| 32741               | 20977 |     | 19456 |      |   |
| 73.5605320428151    | 110   | 150 | 0     | Open | ; |
| 32742               | 18523 |     | 24342 |      |   |
| 73.6130994228371    | 200   | 150 | 0     | Open | ; |
| 32743               | 24040 |     | 19675 |      |   |
| 73.6669432592164    | 110   | 150 | 0     | Open | ; |
| 32744               | 24628 |     | 24616 |      |   |
| 73.7407113928357    | 160   | 150 | 0     | Open | ; |
| 32745               | 21888 |     | 22269 |      |   |
| 73.7456771718557    | 110   | 150 | 0     | Open | ; |
| 32746               | 23275 |     | 23525 |      |   |
| 78.9456809630915    | 110   | 150 | 0     | Open | ; |
| 32747               | 19255 |     | 23562 |      |   |

|                  |       |     |       |      |   |
|------------------|-------|-----|-------|------|---|
| 73.8660110276641 | 75    | 140 | 0     | Open | ; |
| 32748            | 24525 |     | 24521 |      |   |
| 73.8683291610936 | 110   | 150 | 0     | Open | ; |
| 32749            | 24353 |     | 24352 |      |   |
| 126.806237781378 | 75    | 150 | 0     | Open | ; |
| 32750            | 18569 |     | 18570 |      |   |
| 73.9157388357102 | 110   | 150 | 0     | Open | ; |
| 32751            | 23322 |     | 21050 |      |   |
| 73.9461428329364 | 100   | 140 | 0     | Open | ; |
| 32752            | 20349 |     | 22707 |      |   |
| 77.1716411946311 | 110   | 150 | 0     | Open | ; |
| 32753            | 19210 |     | 23422 |      |   |
| 73.9802097753394 | 75    | 150 | 0     | Open | ; |
| 32754            | 23073 |     | 18622 |      |   |
| 73.9957125379522 | 75    | 140 | 0     | Open | ; |
| 32755            | 21060 |     | 23891 |      |   |
| 73.9957320317721 | 75    | 140 | 0     | Open | ; |
| 32756            | 20180 |     | 20856 |      |   |
| 73.9958421191136 | 160   | 150 | 0     | Open | ; |
| 32757            | 19699 |     | 18709 |      |   |
| 73.9976677368806 | 75    | 140 | 0     | Open | ; |
| 32758            | 20841 |     | 20842 |      |   |
| 73.9994788322299 | 150   | 140 | 0     | Open | ; |
| 32759            | 22881 |     | 21619 |      |   |
| 74.0009356291167 | 110   | 150 | 0     | Open | ; |
| 32760            | 21252 |     | 22372 |      |   |
| 74.1645755873042 | 140   | 150 | 0     | Open | ; |
| 32761            | 19627 |     | 21928 |      |   |
| 74.1758252227103 | 75    | 150 | 0     | Open | ; |
| 32762            | 20131 |     | 20132 |      |   |
| 74.214304788455  | 75    | 150 | 0     | Open | ; |
| 32763            | 20210 |     | 22694 |      |   |
| 74.220256543432  | 75    | 140 | 0     | Open | ; |
| 32764            | 22428 |     | 22429 |      |   |
| 74.2603156211231 | 75    | 150 | 0     | Open | ; |
| 32765            | 24776 |     | 24778 |      |   |
| 103.919969704179 | 110   | 150 | 0     | Open | ; |
| 32766            | 18972 |     | 19487 |      |   |
| 74.5661265629642 | 150   | 140 | 0     | Open | ; |
| 32767            | 23040 |     | 23469 |      |   |
| 74.5713604200408 | 300   | 140 | 0     | Open | ; |
| 32768            | 23359 |     | 19568 |      |   |
| 74.6686839260152 | 125   | 130 | 0     | Open | ; |
| 32769            | 22118 |     | 20122 |      |   |
| 74.6803353226318 | 100   | 140 | 0     | Open | ; |
| 32770            | 24587 |     | 24588 |      |   |
| 74.7077373203789 | 110   | 150 | 0     | Open | ; |
| 32771            | 22222 |     | 22360 |      |   |
| 74.7203125328617 | 75    | 150 | 0     | Open | ; |
| 32772            | 21079 |     | 23704 |      |   |

|                  |       |     |       |      |   |
|------------------|-------|-----|-------|------|---|
| 74.8084569644636 | 125   | 150 | 0     | Open | ; |
| 32773            | 24027 |     | 24028 |      |   |
| 74.9052147317651 | 75    | 150 | 0     | Open | ; |
| 32774            | 20530 |     | 20775 |      |   |
| 74.9502963398361 | 110   | 150 | 0     | Open | ; |
| 32775            | 23247 |     | 22992 |      |   |
| 74.9560107955049 | 75    | 140 | 0     | Open | ; |
| 32776            | 22732 |     | 23958 |      |   |
| 74.9574588451668 | 125   | 140 | 0     | Open | ; |
| 32777            | 18685 |     | 20126 |      |   |
| 74.9958193343346 | 100   | 140 | 0     | Open | ; |
| 32778            | 22519 |     | 23648 |      |   |
| 74.9955517281863 | 75    | 140 | 0     | Open | ; |
| 32779            | 24186 |     | 25051 |      |   |
| 74.9956677233689 | 75    | 140 | 0     | Open | ; |
| 32780            | 21268 |     | 21176 |      |   |
| 74.9964280253894 | 125   | 150 | 0     | Open | ; |
| 32781            | 23439 |     | 23064 |      |   |
| 74.9978089821911 | 110   | 150 | 0     | Open | ; |
| 32782            | 20123 |     | 20124 |      |   |
| 75.0110639409868 | 75    | 140 | 0     | Open | ; |
| 32783            | 22002 |     | 19284 |      |   |
| 76.9957803127183 | 150   | 140 | 0     | Open | ; |
| 32784            | 20915 |     | 23640 |      |   |
| 75.0967913910044 | 150   | 100 | 0     | Open | ; |
| 32785            | 19523 |     | 19524 |      |   |
| 75.1324771319698 | 160   | 150 | 0     | Open | ; |
| 32786            | 19701 |     | 23627 |      |   |
| 75.143465582166  | 100   | 140 | 0     | Open | ; |
| 32787            | 24519 |     | 21839 |      |   |
| 75.1965773612315 | 110   | 150 | 0     | Open | ; |
| 32788            | 22401 |     | 19164 |      |   |
| 75.3000354320755 | 125   | 140 | 0     | Open | ; |
| 32789            | 24916 |     | 24917 |      |   |
| 75.3134325814406 | 100   | 140 | 0     | Open | ; |
| 32790            | 19176 |     | 19180 |      |   |
| 107.283321594488 | 75    | 140 | 0     | Open | ; |
| 32791            | 21583 |     | 25002 |      |   |
| 84.4393313857767 | 110   | 150 | 0     | Open | ; |
| 32792            | 21704 |     | 22100 |      |   |
| 75.5641821524908 | 140   | 150 | 0     | Open | ; |
| 32793            | 19925 |     | 24080 |      |   |
| 75.6475824284297 | 75    | 150 | 0     | Open | ; |
| 32794            | 24634 |     | 24635 |      |   |
| 75.753538060368  | 140   | 150 | 0     | Open | ; |
| 32795            | 18656 |     | 24941 |      |   |
| 104.994229026221 | 110   | 150 | 0     | Open | ; |
| 32796            | 24947 |     | 24305 |      |   |
| 75.8183644862156 | 75    | 140 | 0     | Open | ; |
| 32797            | 23026 |     | 24527 |      |   |

|                     |       |     |       |      |   |
|---------------------|-------|-----|-------|------|---|
| 76.965382852728 200 |       | 150 | 0     | Open | ; |
| 32798               | 24665 |     | 24666 |      |   |
| 75.9094132289861    | 110   | 150 | 0     | Open | ; |
| 32799               | 19425 |     | 19426 |      |   |
| 75.9433939373859    | 110   | 150 | 0     | Open | ; |
| 32800               | 20774 |     | 20775 |      |   |
| 75.971155729136 110 |       | 150 | 0     | Open | ; |
| 32801               | 22476 |     | 20942 |      |   |
| 76.0036999194045    | 200   | 150 | 0     | Open | ; |
| 32802               | 19423 |     | 19424 |      |   |
| 75.9955468694367    | 110   | 150 | 0     | Open | ; |
| 32803               | 19926 |     | 19927 |      |   |
| 75.9955468706779    | 110   | 150 | 0     | Open | ; |
| 32804               | 20026 |     | 20535 |      |   |
| 75.9957781917423    | 150   | 140 | 0     | Open | ; |
| 32805               | 23587 |     | 23787 |      |   |
| 75.9958462393627    | 75    | 140 | 0     | Open | ; |
| 32806               | 21235 |     | 21236 |      |   |
| 75.9992999494529    | 110   | 150 | 0     | Open | ; |
| 32807               | 18734 |     | 19989 |      |   |
| 76.0076426413473    | 110   | 150 | 0     | Open | ; |
| 32808               | 21483 |     | 21484 |      |   |
| 76.0115889829621    | 110   | 150 | 0     | Open | ; |
| 32809               | 24496 |     | 24558 |      |   |
| 76.0250340594146    | 110   | 150 | 0     | Open | ; |
| 32810               | 21307 |     | 21305 |      |   |
| 76.0484544329219    | 75    | 140 | 0     | Open | ; |
| 32811               | 19154 |     | 18616 |      |   |
| 76.0558129275382    | 150   | 140 | 0     | Open | ; |
| 32812               | 24764 |     | 24765 |      |   |
| 106.273069651762    | 110   | 150 | 0     | Open | ; |
| 32813               | 19628 |     | 22448 |      |   |
| 76.0811803295718    | 200   | 150 | 0     | Open | ; |
| 32814               | 18786 |     | 18787 |      |   |
| 76.0946585116555    | 75    | 140 | 0     | Open | ; |
| 32815               | 24931 |     | 24932 |      |   |
| 76.1305390964266    | 110   | 150 | 0     | Open | ; |
| 32816               | 22363 |     | 22364 |      |   |
| 76.1778592019365    | 75    | 150 | 0     | Open | ; |
| 32817               | 24114 |     | 24071 |      |   |
| 76.2513162708331    | 200   | 140 | 0     | Open | ; |
| 32818               | 24214 |     | 18726 |      |   |
| 90.6493501575183    | 100   | 140 | 0     | Open | ; |
| 32819               | 24977 |     | 21995 |      |   |
| 103.725850981187    | 100   | 140 | 0     | Open | ; |
| 32820               | 19794 |     | 18630 |      |   |
| 76.587039179055 75  |       | 140 | 0     | Open | ; |
| 32821               | 21347 |     | 19872 |      |   |
| 76.7012103838036    | 75    | 140 | 0     | Open | ; |
| 32822               | 24723 |     | 24724 |      |   |

|                     |       |     |       |      |   |
|---------------------|-------|-----|-------|------|---|
| 76.7718070194201    | 140   | 150 | 0     | Open | ; |
| 32823               | 24139 |     | 19995 |      |   |
| 106.993940482015    | 125   | 150 | 0     | Open | ; |
| 32824               | 24041 |     | 19672 |      |   |
| 76.783367619478 110 |       | 150 | 0     | Open | ; |
| 32825               | 25134 |     | 24448 |      |   |
| 104.143541817887    | 110   | 150 | 0     | Open | ; |
| 32826               | 19806 |     | 19807 |      |   |
| 88.1797032636996    | 100   | 140 | 0     | Open | ; |
| 32827               | 21688 |     | 19196 |      |   |
| 78.6506094948062    | 100   | 140 | 0     | Open | ; |
| 32828               | 24953 |     | 24964 |      |   |
| 90.3885470041722    | 200   | 150 | 0     | Open | ; |
| 32829               | 20525 |     | 20567 |      |   |
| 76.9835948479139    | 250   | 140 | 0     | Open | ; |
| 32830               | 23020 |     | 23021 |      |   |
| 76.995549709265 100 |       | 140 | 0     | Open | ; |
| 32831               | 25696 |     | 24857 |      |   |
| 79.9339311122085    | 160   | 150 | 0     | Open | ; |
| 32832               | 23132 |     | 19221 |      |   |
| 77.055296893768 110 |       | 150 | 0     | Open | ; |
| 32833               | 23053 |     | 23054 |      |   |
| 77.0967858850864    | 75    | 150 | 0     | Open | ; |
| 32834               | 22618 |     | 22716 |      |   |
| 77.2035703340115    | 110   | 150 | 0     | Open | ; |
| 32835               | 23105 |     | 25004 |      |   |
| 104.495458041189    | 110   | 150 | 0     | Open | ; |
| 32836               | 20171 |     | 20172 |      |   |
| 77.3060028133174    | 75    | 150 | 0     | Open | ; |
| 32837               | 22903 |     | 23121 |      |   |
| 77.365637209541 75  |       | 140 | 0     | Open | ; |
| 32838               | 23400 |     | 24263 |      |   |
| 85.800289010945 110 |       | 150 | 0     | Open | ; |
| 32839               | 21203 |     | 21430 |      |   |
| 77.5975145913966    | 125   | 150 | 0     | Open | ; |
| 32840               | 23863 |     | 18998 |      |   |
| 77.602427282703 75  |       | 140 | 0     | Open | ; |
| 32841               | 21433 |     | 19382 |      |   |
| 77.6551751349107    | 75    | 140 | 0     | Open | ; |
| 32842               | 25152 |     | 23857 |      |   |
| 77.7991627878609    | 110   | 150 | 0     | Open | ; |
| 32843               | 20669 |     | 19669 |      |   |
| 77.856761317968 110 |       | 150 | 0     | Open | ; |
| 32844               | 19782 |     | 19783 |      |   |
| 77.8658798572599    | 75    | 150 | 0     | Open | ; |
| 32845               | 22426 |     | 22885 |      |   |
| 77.8673989554989    | 110   | 150 | 0     | Open | ; |
| 32846               | 23589 |     | 18649 |      |   |
| 77.8744334700904    | 250   | 100 | 0     | Open | ; |
| 32847               | 18559 |     | 20835 |      |   |

|                     |       |     |       |      |   |
|---------------------|-------|-----|-------|------|---|
| 77.9543478434996    | 200   | 150 | 0     | Open | ; |
| 32848               | 23424 |     | 19209 |      |   |
| 196.192665964499    | 110   | 150 | 0     | Open | ; |
| 32849               | 21347 |     | 18521 |      |   |
| 77.9954748677596    | 75    | 140 | 0     | Open | ; |
| 32850               | 18509 |     | 22485 |      |   |
| 77.9955289011772    | 160   | 150 | 0     | Open | ; |
| 32851               | 19519 |     | 19520 |      |   |
| 77.9956210957635    | 75    | 140 | 0     | Open | ; |
| 32852               | 23587 |     | 22520 |      |   |
| 77.9954881624237    | 75    | 140 | 0     | Open | ; |
| 32853               | 20533 |     | 20779 |      |   |
| 77.9954947409474    | 110   | 150 | 0     | Open | ; |
| 32854               | 21571 |     | 21572 |      |   |
| 77.9955733175913    | 125   | 150 | 0     | Open | ; |
| 32855               | 22053 |     | 23554 |      |   |
| 77.9955938191206    | 110   | 150 | 0     | Open | ; |
| 32856               | 23552 |     | 23553 |      |   |
| 77.9956188113502    | 110   | 150 | 0     | Open | ; |
| 32857               | 18822 |     | 18823 |      |   |
| 78.0122337541933    | 75    | 150 | 0     | Open | ; |
| 32858               | 22848 |     | 24916 |      |   |
| 78.0129402780466    | 100   | 140 | 0     | Open | ; |
| 32859               | 20802 |     | 24998 |      |   |
| 78.0081040621948    | 75    | 150 | 0     | Open | ; |
| 32860               | 22439 |     | 22440 |      |   |
| 78.013757747928 110 |       | 150 | 0     | Open | ; |
| 32861               | 22254 |     | 22255 |      |   |
| 78.1100713849087    | 75    | 150 | 0     | Open | ; |
| 32862               | 22874 |     | 19830 |      |   |
| 78.1318851228733    | 200   | 150 | 0     | Open | ; |
| 32863               | 23854 |     | 23855 |      |   |
| 78.1419134668645    | 75    | 150 | 0     | Open | ; |
| 32864               | 23399 |     | 23524 |      |   |
| 78.1548390653551    | 100   | 140 | 0     | Open | ; |
| 32865               | 20724 |     | 22982 |      |   |
| 78.1727436431994    | 75    | 150 | 0     | Open | ; |
| 32866               | 20167 |     | 21634 |      |   |
| 78.2204102006342    | 75    | 150 | 0     | Open | ; |
| 32867               | 22998 |     | 20832 |      |   |
| 96.674938534516 75  |       | 140 | 0     | Open | ; |
| 32868               | 22089 |     | 22090 |      |   |
| 78.3785729656259    | 200   | 150 | 0     | Open | ; |
| 32869               | 24569 |     | 24836 |      |   |
| 78.3796825575689    | 110   | 150 | 0     | Open | ; |
| 32870               | 23143 |     | 23144 |      |   |
| 78.4901621662801    | 110   | 150 | 0     | Open | ; |
| 32871               | 23008 |     | 20365 |      |   |
| 78.5377244398705    | 150   | 140 | 0     | Open | ; |
| 32872               | 20355 |     | 22287 |      |   |

|                     |       |     |       |      |   |
|---------------------|-------|-----|-------|------|---|
| 78.5975980620158    | 110   | 150 | 0     | Open | ; |
| 32873               | 18937 |     | 18938 |      |   |
| 78.6189562593825    | 110   | 150 | 0     | Open | ; |
| 32874               | 24350 |     | 19056 |      |   |
| 78.6331435106176    | 150   | 140 | 0     | Open | ; |
| 32875               | 22359 |     | 20629 |      |   |
| 78.6744116024182    | 110   | 150 | 0     | Open | ; |
| 32876               | 24846 |     | 24847 |      |   |
| 78.712329073844 110 |       | 150 | 0     | Open | ; |
| 32877               | 25041 |     | 20870 |      |   |
| 104.462517416522    | 75    | 150 | 0     | Open | ; |
| 32878               | 19340 |     | 19341 |      |   |
| 78.7723090658789    | 125   | 140 | 0     | Open | ; |
| 32879               | 25012 |     | 23036 |      |   |
| 78.7968034191892    | 200   | 140 | 0     | Open | ; |
| 32880               | 23942 |     | 23943 |      |   |
| 78.901116395247 100 |       | 140 | 0     | Open | ; |
| 32881               | 24102 |     | 23081 |      |   |
| 80.9955939100627    | 100   | 140 | 0     | Open | ; |
| 32882               | 19760 |     | 20054 |      |   |
| 79.0145382510159    | 200   | 150 | 0     | Open | ; |
| 32883               | 22227 |     | 19685 |      |   |
| 79.0408572273432    | 75    | 150 | 0     | Open | ; |
| 32884               | 24265 |     | 21404 |      |   |
| 81.5548681626902    | 110   | 140 | 0     | Open | ; |
| 32885               | 24413 |     | 24414 |      |   |
| 79.0650104388174    | 110   | 150 | 0     | Open | ; |
| 32886               | 22998 |     | 24249 |      |   |
| 100.529799793159    | 75    | 140 | 0     | Open | ; |
| 32887               | 21734 |     | 21812 |      |   |
| 79.3515044200967    | 110   | 150 | 0     | Open | ; |
| 32888               | 21120 |     | 21121 |      |   |
| 79.3965061369864    | 100   | 140 | 0     | Open | ; |
| 32889               | 22468 |     | 22469 |      |   |
| 79.3994671184243    | 110   | 150 | 0     | Open | ; |
| 32890               | 20484 |     | 20807 |      |   |
| 79.5528505220983    | 160   | 150 | 0     | Open | ; |
| 32891               | 22015 |     | 20613 |      |   |
| 79.6397480100156    | 110   | 150 | 0     | Open | ; |
| 32892               | 23701 |     | 18852 |      |   |
| 79.7163010168269    | 75    | 140 | 0     | Open | ; |
| 32893               | 22774 |     | 24324 |      |   |
| 129.49221239348 100 |       | 140 | 0     | Open | ; |
| 32894               | 24213 |     | 24529 |      |   |
| 79.8074046184353    | 110   | 150 | 0     | Open | ; |
| 32895               | 20089 |     | 19936 |      |   |
| 79.8095181131753    | 150   | 140 | 0     | Open | ; |
| 32896               | 23264 |     | 18478 |      |   |
| 79.8136773918926    | 300   | 140 | 0     | Open | ; |
| 32897               | 24471 |     | 24473 |      |   |

|                     |       |     |       |      |   |
|---------------------|-------|-----|-------|------|---|
| 79.8269381014437    | 110   | 150 | 0     | Open | ; |
| 32898               | 24563 |     | 24564 |      |   |
| 79.8561960657626    | 110   | 150 | 0     | Open | ; |
| 32899               | 23678 |     | 20728 |      |   |
| 79.8971462699946    | 75    | 150 | 0     | Open | ; |
| 32900               | 20075 |     | 20963 |      |   |
| 79.8892234284829    | 110   | 150 | 0     | Open | ; |
| 32901               | 24841 |     | 24842 |      |   |
| 79.9760386853229    | 110   | 150 | 0     | Open | ; |
| 32902               | 20114 |     | 20115 |      |   |
| 79.9957347870145    | 75    | 150 | 0     | Open | ; |
| 32903               | 20292 |     | 23884 |      |   |
| 79.9954374789276    | 150   | 140 | 0     | Open | ; |
| 32904               | 22595 |     | 22593 |      |   |
| 79.9954743373519    | 140   | 150 | 0     | Open | ; |
| 32905               | 19826 |     | 19827 |      |   |
| 79.9954835055278    | 75    | 150 | 0     | Open | ; |
| 32906               | 18466 |     | 20772 |      |   |
| 79.9963190670474    | 75    | 140 | 0     | Open | ; |
| 32907               | 22596 |     | 22594 |      |   |
| 135.275434703121    | 110   | 150 | 0     | Open | ; |
| 32908               | 20238 |     | 22403 |      |   |
| 79.9987582338465    | 125   | 140 | 0     | Open | ; |
| 32909               | 21464 |     | 24377 |      |   |
| 88.9651662412907    | 110   | 150 | 0     | Open | ; |
| 32910               | 19987 |     | 19988 |      |   |
| 80.0170426437618    | 75    | 150 | 0     | Open | ; |
| 32911               | 24922 |     | 24933 |      |   |
| 80.0671053746876    | 110   | 150 | 0     | Open | ; |
| 32912               | 21713 |     | 23499 |      |   |
| 80.1201730768488    | 160   | 150 | 0     | Open | ; |
| 32913               | 20900 |     | 20822 |      |   |
| 80.1235815755861    | 300   | 140 | 0     | Open | ; |
| 32914               | 24609 |     | 24650 |      |   |
| 80.1511187709914    | 160   | 150 | 0     | Open | ; |
| 32915               | 22928 |     | 22929 |      |   |
| 80.1567547132509    | 110   | 150 | 0     | Open | ; |
| 32916               | 19758 |     | 21090 |      |   |
| 80.1694247094277    | 75    | 150 | 0     | Open | ; |
| 32917               | 20834 |     | 22470 |      |   |
| 80.195239510776 100 |       | 140 | 0     | Open | ; |
| 32918               | 22400 |     | 22331 |      |   |
| 80.1954681266189    | 110   | 150 | 0     | Open | ; |
| 32919               | 19915 |     | 19916 |      |   |
| 80.29531801347 75   |       | 140 | 0     | Open | ; |
| 32920               | 24049 |     | 25160 |      |   |
| 80.3969686152214    | 110   | 150 | 0     | Open | ; |
| 32921               | 20968 |     | 20074 |      |   |
| 80.3870984083755    | 110   | 150 | 0     | Open | ; |
| 32922               | 23274 |     | 22037 |      |   |



|                     |       |     |       |      |   |
|---------------------|-------|-----|-------|------|---|
| 80.3922894512956    | 110   | 150 | 0     | Open | ; |
| 32923               | 22074 |     | 22386 |      |   |
| 80.4179855286998    | 110   | 150 | 0     | Open | ; |
| 32924               | 20858 |     | 20859 |      |   |
| 80.4275972955661    | 75    | 140 | 0     | Open | ; |
| 32925               | 24565 |     | 24566 |      |   |
| 80.4507566429989    | 110   | 150 | 0     | Open | ; |
| 32926               | 24248 |     | 20635 |      |   |
| 80.4843958006721    | 75    | 140 | 0     | Open | ; |
| 32927               | 19757 |     | 22509 |      |   |
| 80.4923851250664    | 75    | 150 | 0     | Open | ; |
| 32928               | 23368 |     | 23369 |      |   |
| 80.4952091444079    | 75    | 150 | 0     | Open | ; |
| 32929               | 23370 |     | 23371 |      |   |
| 80.4952091454035    | 75    | 150 | 0     | Open | ; |
| 32930               | 21159 |     | 18745 |      |   |
| 80.5054874210154    | 75    | 150 | 0     | Open | ; |
| 32931               | 19917 |     | 19918 |      |   |
| 80.616110103798 75  |       | 140 | 0     | Open | ; |
| 32932               | 19941 |     | 18488 |      |   |
| 110.689241651397    | 100   | 140 | 0     | Open | ; |
| 32933               | 20486 |     | 22488 |      |   |
| 80.7124645447377    | 400   | 130 | 0     | Open | ; |
| 32934               | 24595 |     | 22619 |      |   |
| 81.0470014727801    | 110   | 150 | 0     | Open | ; |
| 32935               | 24365 |     | 18602 |      |   |
| 108.700156745645    | 110   | 150 | 0     | Open | ; |
| 32936               | 20073 |     | 19107 |      |   |
| 80.9078664029512    | 140   | 150 | 0     | Open | ; |
| 32937               | 24810 |     | 24920 |      |   |
| 80.9309846168837    | 110   | 150 | 0     | Open | ; |
| 32938               | 20105 |     | 20106 |      |   |
| 81.0302584854983    | 75    | 150 | 0     | Open | ; |
| 32939               | 21516 |     | 21517 |      |   |
| 80.9940458219059    | 110   | 150 | 0     | Open | ; |
| 32940               | 18710 |     | 18711 |      |   |
| 80.9958887186974    | 110   | 150 | 0     | Open | ; |
| 32941               | 19458 |     | 19459 |      |   |
| 81.0102332995857    | 110   | 150 | 0     | Open | ; |
| 32942               | 18716 |     | 23872 |      |   |
| 82.995503201901 125 |       | 100 | 0     | Open | ; |
| 32943               | 24469 |     | 24472 |      |   |
| 81.5824437391814    | 110   | 150 | 0     | Open | ; |
| 32944               | 22261 |     | 22262 |      |   |
| 81.290433209173 110 |       | 150 | 0     | Open | ; |
| 32945               | 21760 |     | 24156 |      |   |
| 81.4148774822409    | 110   | 150 | 0     | Open | ; |
| 32946               | 24468 |     | 24574 |      |   |
| 81.4469426674813    | 110   | 150 | 0     | Open | ; |
| 32947               | 18672 |     | 18673 |      |   |

|                  |       |     |       |      |   |
|------------------|-------|-----|-------|------|---|
| 81.4952795757322 | 75    | 140 | 0     | Open | ; |
| 32948            | 22708 |     | 22486 |      |   |
| 111.999830752466 | 110   | 150 | 0     | Open | ; |
| 32949            | 23363 |     | 22585 |      |   |
| 81.6541817151938 | 160   | 150 | 0     | Open | ; |
| 32950            | 22049 |     | 22050 |      |   |
| 81.6242881661172 | 100   | 140 | 0     | Open | ; |
| 32951            | 18843 |     | 18844 |      |   |
| 81.6687057498394 | 75    | 140 | 0     | Open | ; |
| 32952            | 19610 |     | 20544 |      |   |
| 81.6975949146422 | 110   | 150 | 0     | Open | ; |
| 32953            | 24570 |     | 24572 |      |   |
| 81.7698607806802 | 110   | 150 | 0     | Open | ; |
| 32954            | 22065 |     | 24110 |      |   |
| 81.8734294896    | 450   | 100 | 0     | Open | ; |
| 32955            | 22711 |     | 23856 |      |   |
| 81.9514817429393 | 125   | 150 | 0     | Open | ; |
| 32956            | 22612 |     | 22613 |      |   |
| 81.9569753371551 | 110   | 150 | 0     | Open | ; |
| 32957            | 20981 |     | 20982 |      |   |
| 81.9862128615211 | 75    | 140 | 0     | Open | ; |
| 32958            | 20135 |     | 22844 |      |   |
| 81.9953229696294 | 100   | 140 | 0     | Open | ; |
| 32959            | 23014 |     | 23015 |      |   |
| 81.9953339476192 | 110   | 150 | 0     | Open | ; |
| 32960            | 19839 |     | 19840 |      |   |
| 82.0002202585661 | 75    | 140 | 0     | Open | ; |
| 32961            | 19792 |     | 19793 |      |   |
| 82.0050955252699 | 75    | 140 | 0     | Open | ; |
| 32962            | 21840 |     | 21841 |      |   |
| 82.0246733082962 | 110   | 150 | 0     | Open | ; |
| 32963            | 18592 |     | 22748 |      |   |
| 82.0491207965811 | 110   | 150 | 0     | Open | ; |
| 32964            | 24567 |     | 24568 |      |   |
| 82.2089155698669 | 110   | 150 | 0     | Open | ; |
| 32965            | 21983 |     | 24356 |      |   |
| 110.33915901441  | 160   | 150 | 0     | Open | ; |
| 32966            | 20212 |     | 20637 |      |   |
| 82.3321607717243 | 200   | 140 | 0     | Open | ; |
| 32967            | 24712 |     | 24711 |      |   |
| 82.4131876850312 | 110   | 150 | 0     | Open | ; |
| 32968            | 24234 |     | 22980 |      |   |
| 83.3343161823861 | 75    | 150 | 0     | Open | ; |
| 32969            | 24559 |     | 25138 |      |   |
| 82.5261808529242 | 90    | 150 | 0     | Open | ; |
| 32970            | 23260 |     | 22279 |      |   |
| 82.4410823283477 | 200   | 150 | 0     | Open | ; |
| 32971            | 24077 |     | 22664 |      |   |
| 82.4952553994608 | 100   | 140 | 0     | Open | ; |
| 32972            | 19568 |     | 19570 |      |   |

|                     |       |     |       |      |   |
|---------------------|-------|-----|-------|------|---|
| 82.5957699522086    | 125   | 130 | 0     | Open | ; |
| 32973               | 24471 |     | 25673 |      |   |
| 102.660306538107    | 110   | 150 | 0     | Open | ; |
| 32974               | 23514 |     | 25146 |      |   |
| 82.7456633580119    | 75    | 140 | 0     | Open | ; |
| 32975               | 18802 |     | 18803 |      |   |
| 82.7055915933609    | 75    | 150 | 0     | Open | ; |
| 32976               | 21476 |     | 18588 |      |   |
| 82.7459989104023    | 125   | 150 | 0     | Open | ; |
| 32977               | 19629 |     | 20933 |      |   |
| 107.914116346332    | 110   | 150 | 0     | Open | ; |
| 32978               | 20462 |     | 21595 |      |   |
| 110.168481961043    | 200   | 150 | 0     | Open | ; |
| 32979               | 22915 |     | 23018 |      |   |
| 82.965522032191 100 |       | 140 | 0     | Open | ; |
| 32980               | 24643 |     | 24644 |      |   |
| 82.9754649242133    | 110   | 150 | 0     | Open | ; |
| 32981               | 20862 |     | 20863 |      |   |
| 82.9923870916465    | 75    | 140 | 0     | Open | ; |
| 32982               | 18686 |     | 18687 |      |   |
| 83.0102845781258    | 75    | 140 | 0     | Open | ; |
| 32983               | 20396 |     | 20537 |      |   |
| 84.9952568974458    | 140   | 150 | 0     | Open | ; |
| 32984               | 20339 |     | 18788 |      |   |
| 83.3352704420192    | 200   | 150 | 0     | Open | ; |
| 32985               | 21702 |     | 18705 |      |   |
| 83.3456073068139    | 110   | 150 | 0     | Open | ; |
| 32986               | 21701 |     | 18704 |      |   |
| 83.3457025216648    | 110   | 150 | 0     | Open | ; |
| 32987               | 19704 |     | 18738 |      |   |
| 83.3642890852757    | 110   | 150 | 0     | Open | ; |
| 32988               | 23260 |     | 23816 |      |   |
| 83.3702131614963    | 200   | 150 | 0     | Open | ; |
| 32989               | 19686 |     | 20568 |      |   |
| 83.4657781667129    | 160   | 150 | 0     | Open | ; |
| 32990               | 23506 |     | 18635 |      |   |
| 77.6161133244715    | 125   | 140 | 0     | Open | ; |
| 32991               | 24235 |     | 22065 |      |   |
| 84.1497987181678    | 100   | 140 | 0     | Open | ; |
| 32992               | 22717 |     | 22617 |      |   |
| 83.5830956560957    | 110   | 150 | 0     | Open | ; |
| 32993               | 25068 |     | 23234 |      |   |
| 117.997491131727    | 75    | 140 | 0     | Open | ; |
| 32994               | 24241 |     | 23791 |      |   |
| 84.056025456367 100 |       | 140 | 0     | Open | ; |
| 32995               | 19694 |     | 24214 |      |   |
| 88.7821404430179    | 100   | 140 | 0     | Open | ; |
| 32996               | 19477 |     | 19478 |      |   |
| 83.9103836800749    | 100   | 140 | 0     | Open | ; |
| 32997               | 18795 |     | 18796 |      |   |

|                  |       |     |       |      |   |
|------------------|-------|-----|-------|------|---|
| 83.9275089269753 | 75    | 150 | 0     | Open | ; |
| 32998            | 18663 |     | 18664 |      |   |
| 83.9588606477878 | 200   | 140 | 0     | Open | ; |
| 32999            | 20860 |     | 20861 |      |   |
| 83.9833272354535 | 100   | 140 | 0     | Open | ; |
| 33000            | 21245 |     | 21246 |      |   |
| 83.9950026786494 | 110   | 150 | 0     | Open | ; |
| 33001            | 19372 |     | 19373 |      |   |
| 83.9949072255809 | 100   | 140 | 0     | Open | ; |
| 33002            | 22330 |     | 20814 |      |   |
| 83.9949313501657 | 75    | 150 | 0     | Open | ; |
| 33003            | 19659 |     | 20812 |      |   |
| 83.9949499194807 | 75    | 150 | 0     | Open | ; |
| 33004            | 19657 |     | 19625 |      |   |
| 83.995029610321  | 75    | 150 | 0     | Open | ; |
| 33005            | 20440 |     | 22340 |      |   |
| 83.9950296104923 | 75    | 150 | 0     | Open | ; |
| 33006            | 18951 |     | 18952 |      |   |
| 83.995247022036  | 110   | 150 | 0     | Open | ; |
| 33007            | 18949 |     | 18950 |      |   |
| 83.9952672734969 | 110   | 150 | 0     | Open | ; |
| 33008            | 24287 |     | 24286 |      |   |
| 83.9967162016855 | 100   | 140 | 0     | Open | ; |
| 33009            | 24635 |     | 24643 |      |   |
| 93.8212052412055 | 140   | 150 | 0     | Open | ; |
| 33010            | 22568 |     | 25679 |      |   |
| 84.1193420910143 | 110   | 150 | 0     | Open | ; |
| 33011            | 20482 |     | 25056 |      |   |
| 109.328710845298 | 110   | 150 | 0     | Open | ; |
| 33012            | 18977 |     | 20159 |      |   |
| 112.04124361384  | 75    | 140 | 0     | Open | ; |
| 33013            | 24279 |     | 24116 |      |   |
| 110.970900342823 | 75    | 150 | 0     | Open | ; |
| 33014            | 18604 |     | 18605 |      |   |
| 91.9877969368009 | 75    | 150 | 0     | Open | ; |
| 33015            | 24000 |     | 21589 |      |   |
| 84.3949951007881 | 110   | 150 | 0     | Open | ; |
| 33016            | 24493 |     | 24492 |      |   |
| 105.553049154151 | 110   | 150 | 0     | Open | ; |
| 33017            | 22216 |     | 22556 |      |   |
| 84.5444988229087 | 75    | 150 | 0     | Open | ; |
| 33018            | 20248 |     | 20852 |      |   |
| 84.8441697022308 | 110   | 150 | 0     | Open | ; |
| 33019            | 24284 |     | 23886 |      |   |
| 90.2311273947251 | 100   | 140 | 0     | Open | ; |
| 33020            | 22841 |     | 22161 |      |   |
| 84.8539443203819 | 75    | 140 | 0     | Open | ; |
| 33021            | 18877 |     | 18878 |      |   |
| 84.9933823065197 | 140   | 150 | 0     | Open | ; |
| 33022            | 20012 |     | 21839 |      |   |

|                     |       |     |       |      |   |
|---------------------|-------|-----|-------|------|---|
| 84.9951836758019    | 110   | 150 | 0     | Open | ; |
| 33023               | 23568 |     | 20296 |      |   |
| 84.9952427162442    | 200   | 140 | 0     | Open | ; |
| 33024               | 21215 |     | 21216 |      |   |
| 84.9968391827756    | 110   | 150 | 0     | Open | ; |
| 33025               | 18828 |     | 18746 |      |   |
| 85.0058159375963    | 160   | 150 | 0     | Open | ; |
| 33026               | 21539 |     | 19339 |      |   |
| 85.0119653825725    | 100   | 140 | 0     | Open | ; |
| 33027               | 20607 |     | 23205 |      |   |
| 85.0131987281996    | 125   | 150 | 0     | Open | ; |
| 33028               | 21534 |     | 20722 |      |   |
| 85.0225316492763    | 150   | 100 | 0     | Open | ; |
| 33029               | 18793 |     | 18794 |      |   |
| 85.0811188938394    | 75    | 150 | 0     | Open | ; |
| 33030               | 20939 |     | 21581 |      |   |
| 85.0863702810634    | 160   | 150 | 0     | Open | ; |
| 33031               | 24391 |     | 24264 |      |   |
| 85.461952857927 110 |       | 150 | 0     | Open | ; |
| 33032               | 22803 |     | 22505 |      |   |
| 85.4378813392847    | 75    | 150 | 0     | Open | ; |
| 33033               | 24791 |     | 24792 |      |   |
| 85.4509153547451    | 110   | 150 | 0     | Open | ; |
| 33034               | 24001 |     | 24002 |      |   |
| 85.5921922614451    | 110   | 150 | 0     | Open | ; |
| 33035               | 19523 |     | 20797 |      |   |
| 85.6123390122105    | 160   | 150 | 0     | Open | ; |
| 33036               | 19194 |     | 21261 |      |   |
| 119.289567000039    | 75    | 140 | 0     | Open | ; |
| 33037               | 23732 |     | 23733 |      |   |
| 85.6787281220258    | 110   | 150 | 0     | Open | ; |
| 33038               | 22085 |     | 18550 |      |   |
| 85.7679218675542    | 110   | 150 | 0     | Open | ; |
| 33039               | 20241 |     | 20414 |      |   |
| 85.8107548113404    | 110   | 150 | 0     | Open | ; |
| 33040               | 20810 |     | 23737 |      |   |
| 85.9950540013539    | 110   | 150 | 0     | Open | ; |
| 33041               | 22203 |     | 22810 |      |   |
| 85.9950725715538    | 110   | 150 | 0     | Open | ; |
| 33042               | 20104 |     | 23261 |      |   |
| 85.995176214887 75  |       | 140 | 0     | Open | ; |
| 33043               | 23037 |     | 23038 |      |   |
| 86.0027483074803    | 75    | 150 | 0     | Open | ; |
| 33044               | 21637 |     | 18507 |      |   |
| 86.1135671742328    | 110   | 150 | 0     | Open | ; |
| 33045               | 24731 |     | 25688 |      |   |
| 117.34829597823 110 |       | 150 | 0     | Open | ; |
| 33046               | 19069 |     | 19071 |      |   |
| 86.1444116429472    | 75    | 150 | 0     | Open | ; |
| 33047               | 24980 |     | 23380 |      |   |

|                     |       |     |       |      |   |
|---------------------|-------|-----|-------|------|---|
| 87.3747339211643    | 75    | 150 | 0     | Open | ; |
| 33048               | 20665 |     | 20666 |      |   |
| 86.1951886373334    | 110   | 150 | 0     | Open | ; |
| 33049               | 24777 |     | 24758 |      |   |
| 109.667262191581    | 110   | 150 | 0     | Open | ; |
| 33050               | 18874 |     | 23784 |      |   |
| 86.2377660517291    | 125   | 140 | 0     | Open | ; |
| 33051               | 24084 |     | 19529 |      |   |
| 86.2519689331936    | 110   | 150 | 0     | Open | ; |
| 33052               | 21889 |     | 21890 |      |   |
| 86.2708038532868    | 110   | 150 | 0     | Open | ; |
| 33053               | 22109 |     | 22110 |      |   |
| 86.303624218963 75  |       | 150 | 0     | Open | ; |
| 33054               | 21095 |     | 18762 |      |   |
| 86.3844286276783    | 250   | 100 | 0     | Open | ; |
| 33055               | 24272 |     | 21276 |      |   |
| 121.64040563184 75  |       | 140 | 0     | Open | ; |
| 33056               | 25073 |     | 24199 |      |   |
| 86.5636621436903    | 110   | 150 | 0     | Open | ; |
| 33057               | 20718 |     | 24917 |      |   |
| 86.4904325602503    | 100   | 140 | 0     | Open | ; |
| 33058               | 24347 |     | 24346 |      |   |
| 86.725236638968 125 |       | 150 | 0     | Open | ; |
| 33059               | 20757 |     | 19638 |      |   |
| 86.8954974193271    | 125   | 150 | 0     | Open | ; |
| 33060               | 23208 |     | 24136 |      |   |
| 86.8226875491201    | 100   | 140 | 0     | Open | ; |
| 33061               | 20435 |     | 24326 |      |   |
| 95.5226739748595    | 110   | 150 | 0     | Open | ; |
| 33062               | 21945 |     | 22557 |      |   |
| 86.9109502682746    | 75    | 150 | 0     | Open | ; |
| 33063               | 23659 |     | 19379 |      |   |
| 86.9799688243471    | 250   | 140 | 0     | Open | ; |
| 33064               | 18748 |     | 18749 |      |   |
| 86.9586268592374    | 250   | 100 | 0     | Open | ; |
| 33065               | 19724 |     | 23959 |      |   |
| 86.9811288721751    | 110   | 150 | 0     | Open | ; |
| 33066               | 21386 |     | 21387 |      |   |
| 86.9950712700471    | 110   | 150 | 0     | Open | ; |
| 33067               | 18556 |     | 18557 |      |   |
| 87.0916224244724    | 110   | 150 | 0     | Open | ; |
| 33068               | 20550 |     | 19005 |      |   |
| 87.180983166009 160 |       | 150 | 0     | Open | ; |
| 33069               | 25050 |     | 24269 |      |   |
| 89.0744676469668    | 200   | 150 | 0     | Open | ; |
| 33070               | 21424 |     | 21425 |      |   |
| 87.3492790939136    | 75    | 150 | 0     | Open | ; |
| 33071               | 22666 |     | 19255 |      |   |
| 121.812091561851    | 75    | 140 | 0     | Open | ; |
| 33072               | 24183 |     | 24957 |      |   |

|                     |       |     |       |      |   |
|---------------------|-------|-----|-------|------|---|
| 89.5060451541902    | 100   | 140 | 0     | Open | ; |
| 33073               | 18712 |     | 19414 |      |   |
| 87.7763772041855    | 110   | 150 | 0     | Open | ; |
| 33074               | 21596 |     | 21597 |      |   |
| 87.894938590517 110 |       | 150 | 0     | Open | ; |
| 33075               | 20509 |     | 22411 |      |   |
| 87.9399923573464    | 75    | 150 | 0     | Open | ; |
| 33076               | 22719 |     | 23200 |      |   |
| 87.9423954580098    | 200   | 140 | 0     | Open | ; |
| 33077               | 21022 |     | 24965 |      |   |
| 87.9647912713424    | 75    | 150 | 0     | Open | ; |
| 33078               | 18590 |     | 19550 |      |   |
| 120.099727823322    | 160   | 150 | 0     | Open | ; |
| 33079               | 20866 |     | 20867 |      |   |
| 87.9931825916956    | 75    | 140 | 0     | Open | ; |
| 33080               | 19439 |     | 19440 |      |   |
| 87.9942745506698    | 110   | 150 | 0     | Open | ; |
| 33081               | 21217 |     | 21218 |      |   |
| 87.9946672573782    | 110   | 150 | 0     | Open | ; |
| 33082               | 21029 |     | 24019 |      |   |
| 87.9948328525012    | 75    | 150 | 0     | Open | ; |
| 33083               | 21842 |     | 21843 |      |   |
| 87.9948428843549    | 110   | 150 | 0     | Open | ; |
| 33084               | 19331 |     | 19332 |      |   |
| 87.9948882406918    | 75    | 150 | 0     | Open | ; |
| 33085               | 19823 |     | 19824 |      |   |
| 87.9949908408503    | 75    | 150 | 0     | Open | ; |
| 33086               | 23204 |     | 18636 |      |   |
| 87.9950032159149    | 125   | 140 | 0     | Open | ; |
| 33087               | 21100 |     | 21101 |      |   |
| 87.9979516439634    | 110   | 150 | 0     | Open | ; |
| 33088               | 21701 |     | 21357 |      |   |
| 111.596408206873    | 110   | 150 | 0     | Open | ; |
| 33089               | 22044 |     | 22045 |      |   |
| 88.0090611046543    | 75    | 150 | 0     | Open | ; |
| 33090               | 21823 |     | 21824 |      |   |
| 88.015878292938 75  |       | 150 | 0     | Open | ; |
| 33091               | 22484 |     | 20798 |      |   |
| 90.7208139831744    | 75    | 150 | 0     | Open | ; |
| 33092               | 22580 |     | 23804 |      |   |
| 88.1133704897307    | 75    | 140 | 0     | Open | ; |
| 33093               | 24086 |     | 23445 |      |   |
| 88.2373720931194    | 100   | 140 | 0     | Open | ; |
| 33094               | 24858 |     | 24860 |      |   |
| 88.4463418886235    | 160   | 150 | 0     | Open | ; |
| 33095               | 22175 |     | 22176 |      |   |
| 88.7101771909314    | 500   | 140 | 0     | Open | ; |
| 33096               | 19346 |     | 19345 |      |   |
| 88.7130923678226    | 100   | 140 | 0     | Open | ; |
| 33097               | 23034 |     | 19924 |      |   |

|                     |       |     |       |      |   |
|---------------------|-------|-----|-------|------|---|
| 88.8306565128216    | 140   | 150 | 0     | Open | ; |
| 33098               | 24590 |     | 24591 |      |   |
| 88.8679980049555    | 110   | 150 | 0     | Open | ; |
| 33099               | 22766 |     | 22767 |      |   |
| 88.9686538424871    | 200   | 150 | 0     | Open | ; |
| 33100               | 20004 |     | 23194 |      |   |
| 88.994723106926 75  |       | 150 | 0     | Open | ; |
| 33101               | 18718 |     | 18719 |      |   |
| 88.9949113969024    | 100   | 140 | 0     | Open | ; |
| 33102               | 20418 |     | 19639 |      |   |
| 90.9920780867993    | 110   | 150 | 0     | Open | ; |
| 33103               | 22858 |     | 22775 |      |   |
| 89.0867852556066    | 75    | 140 | 0     | Open | ; |
| 33104               | 18893 |     | 22558 |      |   |
| 89.2773220253422    | 75    | 150 | 0     | Open | ; |
| 33105               | 22315 |     | 25061 |      |   |
| 111.152525499939    | 110   | 150 | 0     | Open | ; |
| 33106               | 19337 |     | 19338 |      |   |
| 89.5461770432295    | 75    | 140 | 0     | Open | ; |
| 33107               | 24261 |     | 25003 |      |   |
| 105.205299176671    | 75    | 150 | 0     | Open | ; |
| 33108               | 18987 |     | 21885 |      |   |
| 89.6772601229354    | 75    | 150 | 0     | Open | ; |
| 33109               | 19447 |     | 19448 |      |   |
| 89.8760818242966    | 110   | 150 | 0     | Open | ; |
| 33110               | 23730 |     | 24906 |      |   |
| 89.8817910115285    | 160   | 150 | 0     | Open | ; |
| 33111               | 20449 |     | 23270 |      |   |
| 89.9274782546907    | 110   | 150 | 0     | Open | ; |
| 33112               | 23701 |     | 24126 |      |   |
| 138.49866837025 75  |       | 140 | 0     | Open | ; |
| 33113               | 23671 |     | 23559 |      |   |
| 89.9949201829141    | 150   | 140 | 0     | Open | ; |
| 33114               | 20540 |     | 20541 |      |   |
| 89.9949147021464    | 110   | 150 | 0     | Open | ; |
| 33115               | 19441 |     | 19442 |      |   |
| 89.994931409178 140 |       | 150 | 0     | Open | ; |
| 33116               | 21132 |     | 21133 |      |   |
| 90.0047673345653    | 75    | 140 | 0     | Open | ; |
| 33117               | 19109 |     | 19110 |      |   |
| 90.0343684717845    | 110   | 150 | 0     | Open | ; |
| 33118               | 22341 |     | 20825 |      |   |
| 90.1513320373216    | 150   | 140 | 0     | Open | ; |
| 33119               | 19713 |     | 19463 |      |   |
| 90.1602180197416    | 110   | 150 | 0     | Open | ; |
| 33121               | 22209 |     | 22211 |      |   |
| 90.3271668870466    | 75    | 150 | 0     | Open | ; |
| 33122               | 24875 |     | 24870 |      |   |
| 90.4350597634569    | 200   | 150 | 0     | Open | ; |
| 33123               | 21554 |     | 23132 |      |   |



|                  |       |     |       |      |   |
|------------------|-------|-----|-------|------|---|
| 90.9964139442153 | 110   | 150 | 0     | Open | ; |
| 33124            | 21741 |     | 21742 |      |   |
| 90.4864823804663 | 110   | 150 | 0     | Open | ; |
| 33125            | 20453 |     | 23241 |      |   |
| 90.5083325547494 | 110   | 150 | 0     | Open | ; |
| 33126            | 23749 |     | 22964 |      |   |
| 90.5189521768022 | 450   | 100 | 0     | Open | ; |
| 33127            | 20849 |     | 18938 |      |   |
| 90.6846540937076 | 110   | 150 | 0     | Open | ; |
| 33128            | 25010 |     | 22687 |      |   |
| 90.8933046957733 | 250   | 100 | 0     | Open | ; |
| 33129            | 22355 |     | 19804 |      |   |
| 90.9026164507795 | 110   | 150 | 0     | Open | ; |
| 33130            | 24006 |     | 18982 |      |   |
| 91.6954041967523 | 110   | 150 | 0     | Open | ; |
| 33131            | 23233 |     | 23236 |      |   |
| 90.9920455001009 | 75    | 140 | 0     | Open | ; |
| 33132            | 20190 |     | 19308 |      |   |
| 90.9941764636935 | 100   | 140 | 0     | Open | ; |
| 33133            | 24527 |     | 24953 |      |   |
| 90.9951897644627 | 200   | 150 | 0     | Open | ; |
| 33134            | 21439 |     | 21440 |      |   |
| 91.0092886127495 | 110   | 150 | 0     | Open | ; |
| 33135            | 21605 |     | 21606 |      |   |
| 91.0840766468925 | 110   | 150 | 0     | Open | ; |
| 33136            | 18659 |     | 18660 |      |   |
| 91.1676236450476 | 250   | 140 | 0     | Open | ; |
| 33137            | 18517 |     | 21282 |      |   |
| 91.1960835524448 | 110   | 150 | 0     | Open | ; |
| 33138            | 19097 |     | 23013 |      |   |
| 91.2805208414077 | 110   | 150 | 0     | Open | ; |
| 33139            | 19602 |     | 20333 |      |   |
| 91.6437734707117 | 75    | 150 | 0     | Open | ; |
| 33140            | 22515 |     | 23573 |      |   |
| 91.76266675116   | 100   | 140 | 0     | Open | ; |
| 33141            | 22895 |     | 19135 |      |   |
| 91.7625156952027 | 75    | 140 | 0     | Open | ; |
| 33142            | 24275 |     | 24159 |      |   |
| 120.994138343399 | 110   | 150 | 0     | Open | ; |
| 33143            | 25065 |     | 22573 |      |   |
| 91.9062750406467 | 75    | 140 | 0     | Open | ; |
| 33144            | 19751 |     | 19752 |      |   |
| 91.9924078834528 | 75    | 140 | 0     | Open | ; |
| 33145            | 21725 |     | 19452 |      |   |
| 92.0354727693453 | 125   | 140 | 0     | Open | ; |
| 33146            | 21189 |     | 21190 |      |   |
| 92.0133806104166 | 110   | 150 | 0     | Open | ; |
| 33147            | 22243 |     | 20881 |      |   |
| 92.0360256402626 | 110   | 150 | 0     | Open | ; |
| 33148            | 23383 |     | 23471 |      |   |

|                  |       |     |       |      |   |
|------------------|-------|-----|-------|------|---|
| 122.894477384074 | 110   | 150 | 0     | Open | ; |
| 33149            | 19453 |     | 21766 |      |   |
| 92.3605575394164 | 125   | 140 | 0     | Open | ; |
| 33150            | 20882 |     | 20884 |      |   |
| 92.1392763954286 | 110   | 150 | 0     | Open | ; |
| 33151            | 21705 |     | 19692 |      |   |
| 92.1596251101776 | 75    | 140 | 0     | Open | ; |
| 33152            | 21514 |     | 21515 |      |   |
| 92.1537969392986 | 110   | 150 | 0     | Open | ; |
| 33153            | 21640 |     | 22136 |      |   |
| 92.1946411192028 | 110   | 150 | 0     | Open | ; |
| 33154            | 19586 |     | 19619 |      |   |
| 92.2445116316357 | 75    | 150 | 0     | Open | ; |
| 33155            | 19588 |     | 19592 |      |   |
| 92.2445302010213 | 75    | 150 | 0     | Open | ; |
| 33156            | 19488 |     | 19489 |      |   |
| 92.2945257650633 | 75    | 150 | 0     | Open | ; |
| 33157            | 24357 |     | 24359 |      |   |
| 93.6472764368609 | 75    | 150 | 0     | Open | ; |
| 33158            | 18929 |     | 20427 |      |   |
| 92.4502502742981 | 110   | 150 | 0     | Open | ; |
| 33159            | 20911 |     | 25150 |      |   |
| 101.240675925546 | 100   | 140 | 0     | Open | ; |
| 33160            | 22454 |     | 22452 |      |   |
| 96.8522290626793 | 160   | 150 | 0     | Open | ; |
| 33161            | 20746 |     | 20747 |      |   |
| 92.6832678761219 | 110   | 150 | 0     | Open | ; |
| 33162            | 22240 |     | 22241 |      |   |
| 92.6895174375308 | 200   | 140 | 0     | Open | ; |
| 33163            | 19314 |     | 23326 |      |   |
| 92.8102186804016 | 200   | 150 | 0     | Open | ; |
| 33164            | 24979 |     | 24202 |      |   |
| 92.8927444111972 | 75    | 150 | 0     | Open | ; |
| 33165            | 22697 |     | 24310 |      |   |
| 100.304224207863 | 100   | 140 | 0     | Open | ; |
| 33166            | 20002 |     | 19506 |      |   |
| 92.9946791910472 | 100   | 140 | 0     | Open | ; |
| 33167            | 23041 |     | 22907 |      |   |
| 92.9947841555462 | 125   | 150 | 0     | Open | ; |
| 33168            | 22366 |     | 20507 |      |   |
| 92.9991722717678 | 110   | 150 | 0     | Open | ; |
| 33169            | 18651 |     | 18652 |      |   |
| 93.0030288220433 | 75    | 140 | 0     | Open | ; |
| 33170            | 18547 |     | 18548 |      |   |
| 93.1842033826359 | 110   | 150 | 0     | Open | ; |
| 33171            | 18823 |     | 24605 |      |   |
| 93.3101617242802 | 75    | 150 | 0     | Open | ; |
| 33172            | 20586 |     | 24867 |      |   |
| 93.3203210668736 | 75    | 150 | 0     | Open | ; |
| 33173            | 19035 |     | 23781 |      |   |

|                     |       |     |       |      |   |
|---------------------|-------|-----|-------|------|---|
| 93.423322652312 75  |       | 140 | 0     | Open | ; |
| 33174               | 22273 |     | 22298 |      |   |
| 93.6700261443042    | 75    | 140 | 0     | Open | ; |
| 33175               | 18865 |     | 18866 |      |   |
| 93.6755769099953    | 100   | 140 | 0     | Open | ; |
| 33176               | 21422 |     | 21423 |      |   |
| 93.8173457653479    | 75    | 150 | 0     | Open | ; |
| 33177               | 23236 |     | 25137 |      |   |
| 93.996668943912 75  |       | 140 | 0     | Open | ; |
| 33178               | 22912 |     | 22984 |      |   |
| 93.9633394751057    | 100   | 140 | 0     | Open | ; |
| 33179               | 18743 |     | 18825 |      |   |
| 93.9922861623682    | 75    | 150 | 0     | Open | ; |
| 33180               | 23492 |     | 21007 |      |   |
| 93.9956381203521    | 100   | 140 | 0     | Open | ; |
| 33181               | 21420 |     | 21421 |      |   |
| 93.9976206148466    | 75    | 150 | 0     | Open | ; |
| 33182               | 21524 |     | 21525 |      |   |
| 94.0170674887153    | 125   | 150 | 0     | Open | ; |
| 33183               | 20158 |     | 23252 |      |   |
| 94.0657019014645    | 110   | 150 | 0     | Open | ; |
| 33184               | 22418 |     | 22419 |      |   |
| 94.1519562038494    | 110   | 150 | 0     | Open | ; |
| 33185               | 24399 |     | 24608 |      |   |
| 94.1557416500753    | 110   | 150 | 0     | Open | ; |
| 33186               | 23887 |     | 22172 |      |   |
| 94.2374898645805    | 125   | 140 | 0     | Open | ; |
| 33187               | 20239 |     | 22691 |      |   |
| 94.3275332862049    | 160   | 150 | 0     | Open | ; |
| 33188               | 19911 |     | 23789 |      |   |
| 94.2949268132424    | 75    | 140 | 0     | Open | ; |
| 33189               | 22581 |     | 22584 |      |   |
| 94.31350831976 75   |       | 140 | 0     | Open | ; |
| 33190               | 23430 |     | 20756 |      |   |
| 94.3239762764213    | 160   | 150 | 0     | Open | ; |
| 33191               | 22097 |     | 22098 |      |   |
| 94.3439789152522    | 125   | 150 | 0     | Open | ; |
| 33192               | 20741 |     | 20542 |      |   |
| 94.3854333170719    | 110   | 150 | 0     | Open | ; |
| 33193               | 21418 |     | 21419 |      |   |
| 94.4748059453808    | 75    | 150 | 0     | Open | ; |
| 33194               | 24087 |     | 24991 |      |   |
| 94.5681070806241    | 110   | 150 | 0     | Open | ; |
| 33195               | 18872 |     | 21349 |      |   |
| 94.5827398068253    | 450   | 130 | 0     | Open | ; |
| 33196               | 22839 |     | 23109 |      |   |
| 94.5890712149764    | 100   | 140 | 0     | Open | ; |
| 33197               | 23388 |     | 23385 |      |   |
| 94.617860638111 100 |       | 140 | 0     | Open | ; |
| 33198               | 22678 |     | 23543 |      |   |

|                  |       |     |       |      |   |
|------------------|-------|-----|-------|------|---|
| 94.9944943269603 | 75    | 140 | 0     | Open | ; |
| 33199            | 21617 |     | 21957 |      |   |
| 94.8350066975458 | 110   | 150 | 0     | Open | ; |
| 33200            | 22026 |     | 22027 |      |   |
| 94.9470710261403 | 110   | 150 | 0     | Open | ; |
| 33201            | 23761 |     | 23766 |      |   |
| 94.9942434137742 | 160   | 150 | 0     | Open | ; |
| 33202            | 21938 |     | 21939 |      |   |
| 94.9949538098641 | 125   | 150 | 0     | Open | ; |
| 33203            | 19418 |     | 19419 |      |   |
| 94.9945513171171 | 110   | 150 | 0     | Open | ; |
| 33204            | 19732 |     | 19733 |      |   |
| 95.0317363000363 | 75    | 140 | 0     | Open | ; |
| 33205            | 24734 |     | 25687 |      |   |
| 131.720652129394 | 100   | 140 | 0     | Open | ; |
| 33206            | 25053 |     | 22810 |      |   |
| 153.471665679626 | 110   | 150 | 0     | Open | ; |
| 33207            | 20046 |     | 22705 |      |   |
| 95.3944475983894 | 110   | 150 | 0     | Open | ; |
| 33208            | 20573 |     | 22806 |      |   |
| 140.583157615834 | 110   | 150 | 0     | Open | ; |
| 33209            | 22271 |     | 22507 |      |   |
| 95.5006855358878 | 75    | 140 | 0     | Open | ; |
| 33210            | 23490 |     | 23491 |      |   |
| 95.5462916281962 | 75    | 140 | 0     | Open | ; |
| 33211            | 21939 |     | 24059 |      |   |
| 121.472861459808 | 125   | 150 | 0     | Open | ; |
| 33212            | 23733 |     | 20556 |      |   |
| 95.8181843485386 | 110   | 150 | 0     | Open | ; |
| 33213            | 24602 |     | 24634 |      |   |
| 95.9941245417881 | 160   | 150 | 0     | Open | ; |
| 33214            | 20845 |     | 20846 |      |   |
| 95.9904423353581 | 75    | 140 | 0     | Open | ; |
| 33215            | 21382 |     | 19909 |      |   |
| 95.9945159810959 | 100   | 140 | 0     | Open | ; |
| 33216            | 20029 |     | 24045 |      |   |
| 95.9942958761698 | 75    | 140 | 0     | Open | ; |
| 33217            | 20896 |     | 20897 |      |   |
| 95.9943791908223 | 75    | 140 | 0     | Open | ; |
| 33218            | 24955 |     | 19683 |      |   |
| 123.718259031274 | 75    | 150 | 0     | Open | ; |
| 33219            | 19479 |     | 19480 |      |   |
| 96.0477245373459 | 110   | 150 | 0     | Open | ; |
| 33220            | 22247 |     | 22248 |      |   |
| 96.1690458637161 | 75    | 150 | 0     | Open | ; |
| 33221            | 22123 |     | 22184 |      |   |
| 96.1751833504424 | 150   | 140 | 0     | Open | ; |
| 33222            | 24940 |     | 18632 |      |   |
| 96.2437311124057 | 250   | 140 | 0     | Open | ; |
| 33223            | 22735 |     | 19589 |      |   |

|                     |       |     |       |      |   |
|---------------------|-------|-----|-------|------|---|
| 96.244541841929 160 |       | 150 | 0     | Open | ; |
| 33224               | 19734 |     | 19735 |      |   |
| 96.3315770281715    | 75    | 140 | 0     | Open | ; |
| 33225               | 20301 |     | 20302 |      |   |
| 96.3798846395898    | 110   | 150 | 0     | Open | ; |
| 33226               | 22640 |     | 22682 |      |   |
| 96.4862247438441    | 110   | 150 | 0     | Open | ; |
| 33227               | 22977 |     | 23637 |      |   |
| 96.582048493146 125 |       | 150 | 0     | Open | ; |
| 33228               | 21514 |     | 24590 |      |   |
| 111.860617047696    | 110   | 150 | 0     | Open | ; |
| 33229               | 22327 |     | 20345 |      |   |
| 111.862309117684    | 110   | 150 | 0     | Open | ; |
| 33230               | 20380 |     | 20384 |      |   |
| 111.883665308203    | 100   | 140 | 0     | Open | ; |
| 33231               | 23740 |     | 23741 |      |   |
| 111.948127153809    | 75    | 150 | 0     | Open | ; |
| 33232               | 24856 |     | 24075 |      |   |
| 111.960968949755    | 75    | 100 | 0     | Open | ; |
| 33233               | 19411 |     | 19412 |      |   |
| 111.993156094451    | 75    | 150 | 0     | Open | ; |
| 33234               | 24119 |     | 18574 |      |   |
| 111.998730387341    | 75    | 140 | 0     | Open | ; |
| 33235               | 18588 |     | 24360 |      |   |
| 142.55646688464 125 |       | 150 | 0     | Open | ; |
| 33236               | 19866 |     | 18965 |      |   |
| 112.037759249545    | 150   | 100 | 0     | Open | ; |
| 33237               | 24283 |     | 23728 |      |   |
| 112.331653144692    | 75    | 150 | 0     | Open | ; |
| 33238               | 24052 |     | 23832 |      |   |
| 114.994637608625    | 150   | 140 | 0     | Open | ; |
| 33239               | 20380 |     | 22379 |      |   |
| 112.478870068997    | 100   | 140 | 0     | Open | ; |
| 33240               | 23742 |     | 23743 |      |   |
| 112.547914904964    | 75    | 150 | 0     | Open | ; |
| 33241               | 18752 |     | 21563 |      |   |
| 112.621219322013    | 100   | 140 | 0     | Open | ; |
| 33242               | 19272 |     | 21527 |      |   |
| 112.628715466951    | 110   | 150 | 0     | Open | ; |
| 33243               | 24098 |     | 24001 |      |   |
| 142.991746439565    | 110   | 150 | 0     | Open | ; |
| 33244               | 20720 |     | 23107 |      |   |
| 112.993406352362    | 110   | 150 | 0     | Open | ; |
| 33245               | 19259 |     | 19260 |      |   |
| 112.99338463516 100 |       | 140 | 0     | Open | ; |
| 33246               | 22851 |     | 23942 |      |   |
| 112.993200573364    | 110   | 150 | 0     | Open | ; |
| 33247               | 20137 |     | 20138 |      |   |
| 112.993086836686    | 75    | 140 | 0     | Open | ; |
| 33248               | 19780 |     | 19869 |      |   |

|                     |       |     |       |      |   |
|---------------------|-------|-----|-------|------|---|
| 112.994615768499    | 75    | 140 | 0     | Open | ; |
| 33249               | 23921 |     | 21415 |      |   |
| 112.995158421979    | 100   | 140 | 0     | Open | ; |
| 33250               | 24445 |     | 24446 |      |   |
| 113.01846005995 110 |       | 150 | 0     | Open | ; |
| 33251               | 24153 |     | 20940 |      |   |
| 149.166756435282    | 125   | 150 | 0     | Open | ; |
| 33252               | 19394 |     | 19395 |      |   |
| 113.026674598048    | 75    | 150 | 0     | Open | ; |
| 33253               | 20585 |     | 19693 |      |   |
| 182.425820341997    | 100   | 140 | 0     | Open | ; |
| 33254               | 19493 |     | 20612 |      |   |
| 113.065472043652    | 100   | 140 | 0     | Open | ; |
| 33255               | 21733 |     | 21734 |      |   |
| 113.181194363387    | 110   | 150 | 0     | Open | ; |
| 33257               | 19121 |     | 19122 |      |   |
| 113.450918718835    | 200   | 100 | 0     | Open | ; |
| 33258               | 19539 |     | 19859 |      |   |
| 113.463417537784    | 100   | 140 | 0     | Open | ; |
| 33259               | 18750 |     | 19285 |      |   |
| 113.491913005122    | 100   | 140 | 0     | Open | ; |
| 33260               | 23168 |     | 23169 |      |   |
| 113.58572845289 160 |       | 150 | 0     | Open | ; |
| 33261               | 19039 |     | 24939 |      |   |
| 113.83576752248 200 |       | 140 | 0     | Open | ; |
| 33262               | 24203 |     | 24204 |      |   |
| 113.853688324021    | 100   | 136 | 0     | Open | ; |
| 33263               | 21559 |     | 18533 |      |   |
| 113.863523537165    | 200   | 100 | 0     | Open | ; |
| 33264               | 24854 |     | 24855 |      |   |
| 113.904488830364    | 110   | 150 | 0     | Open | ; |
| 33265               | 21681 |     | 21682 |      |   |
| 113.947608581502    | 250   | 140 | 0     | Open | ; |
| 33266               | 20719 |     | 23277 |      |   |
| 113.993510919276    | 300   | 140 | 0     | Open | ; |
| 33267               | 22588 |     | 23860 |      |   |
| 113.993466853014    | 75    | 150 | 0     | Open | ; |
| 33268               | 19870 |     | 19871 |      |   |
| 113.993566763171    | 75    | 150 | 0     | Open | ; |
| 33269               | 22381 |     | 19017 |      |   |
| 114.060682606838    | 75    | 150 | 0     | Open | ; |
| 33270               | 20525 |     | 20433 |      |   |
| 114.104472954723    | 250   | 140 | 0     | Open | ; |
| 33271               | 24953 |     | 23816 |      |   |
| 114.265120105132    | 200   | 150 | 0     | Open | ; |
| 33272               | 24500 |     | 24575 |      |   |
| 114.268006440423    | 160   | 150 | 0     | Open | ; |
| 33273               | 24971 |     | 18763 |      |   |
| 114.404938998394    | 250   | 140 | 0     | Open | ; |
| 33274               | 24911 |     | 24912 |      |   |

|                     |       |     |       |      |   |
|---------------------|-------|-----|-------|------|---|
| 114.465190995993    | 75    | 100 | 0     | Open | ; |
| 33275               | 24863 |     | 21253 |      |   |
| 118.821427260177    | 125   | 150 | 0     | Open | ; |
| 33276               | 23380 |     | 23381 |      |   |
| 114.901604238301    | 75    | 150 | 0     | Open | ; |
| 33277               | 22336 |     | 23503 |      |   |
| 114.945195020039    | 125   | 100 | 0     | Open | ; |
| 33278               | 23117 |     | 18646 |      |   |
| 114.927664646204    | 110   | 150 | 0     | Open | ; |
| 33279               | 23524 |     | 23523 |      |   |
| 114.993444769834    | 100   | 140 | 0     | Open | ; |
| 33280               | 20126 |     | 21121 |      |   |
| 114.993489851934    | 100   | 140 | 0     | Open | ; |
| 33281               | 22633 |     | 19671 |      |   |
| 147.004341412803    | 110   | 150 | 0     | Open | ; |
| 33282               | 21493 |     | 21494 |      |   |
| 115.111918427055    | 75    | 100 | 0     | Open | ; |
| 33283               | 23213 |     | 20954 |      |   |
| 169.241175848291    | 110   | 150 | 0     | Open | ; |
| 33284               | 22094 |     | 18583 |      |   |
| 115.164267475867    | 160   | 150 | 0     | Open | ; |
| 33285               | 20587 |     | 25152 |      |   |
| 116.992505442849    | 125   | 140 | 0     | Open | ; |
| 33286               | 24960 |     | 21664 |      |   |
| 115.480135085773    | 200   | 140 | 0     | Open | ; |
| 33287               | 24898 |     | 24900 |      |   |
| 134.098583428718    | 315   | 150 | 0     | Open | ; |
| 33288               | 21775 |     | 21380 |      |   |
| 115.60325116958 300 |       | 140 | 0     | Open | ; |
| 33289               | 21934 |     | 21935 |      |   |
| 115.618043568652    | 100   | 140 | 0     | Open | ; |
| 33290               | 23276 |     | 19872 |      |   |
| 117.274805394155    | 75    | 140 | 0     | Open | ; |
| 33291               | 24420 |     | 24413 |      |   |
| 125.505612130329    | 125   | 150 | 0     | Open | ; |
| 33292               | 24338 |     | 24278 |      |   |
| 137.101166499118    | 75    | 140 | 0     | Open | ; |
| 33293               | 24174 |     | 22061 |      |   |
| 115.88472769634 250 |       | 100 | 0     | Open | ; |
| 33294               | 22643 |     | 22072 |      |   |
| 115.993413567795    | 500   | 150 | 0     | Open | ; |
| 33295               | 24181 |     | 19641 |      |   |
| 115.996798634219    | 200   | 140 | 0     | Open | ; |
| 33296               | 20823 |     | 23716 |      |   |
| 116.993608465612    | 400   | 130 | 0     | Open | ; |
| 33297               | 19808 |     | 19809 |      |   |
| 116.057583370562    | 75    | 140 | 0     | Open | ; |
| 33298               | 19711 |     | 19712 |      |   |
| 116.126965765055    | 300   | 140 | 0     | Open | ; |
| 33299               | 24154 |     | 23373 |      |   |

|                     |       |     |       |      |   |
|---------------------|-------|-----|-------|------|---|
| 149.836428218819    | 110   | 150 | 0     | Open | ; |
| 33300               | 18562 |     | 18563 |      |   |
| 116.476410621429    | 200   | 150 | 0     | Open | ; |
| 33301               | 21139 |     | 18814 |      |   |
| 116.565847651173    | 110   | 150 | 0     | Open | ; |
| 33302               | 23193 |     | 24058 |      |   |
| 165.022410172179    | 75    | 140 | 0     | Open | ; |
| 33303               | 23257 |     | 18928 |      |   |
| 116.647990113791    | 140   | 150 | 0     | Open | ; |
| 33304               | 24285 |     | 22383 |      |   |
| 172.730565210479    | 100   | 140 | 0     | Open | ; |
| 33305               | 21302 |     | 18961 |      |   |
| 116.927743363133    | 250   | 100 | 0     | Open | ; |
| 33306               | 22525 |     | 23823 |      |   |
| 117.559014061827    | 100   | 140 | 0     | Open | ; |
| 33307               | 21413 |     | 19363 |      |   |
| 109.571610047549    | 150   | 140 | 0     | Open | ; |
| 33308               | 18631 |     | 18632 |      |   |
| 116.984516451528    | 250   | 140 | 0     | Open | ; |
| 33309               | 18920 |     | 21048 |      |   |
| 117.009421799567    | 250   | 100 | 0     | Open | ; |
| 33310               | 22208 |     | 20960 |      |   |
| 117.007720038023    | 110   | 150 | 0     | Open | ; |
| 33311               | 20235 |     | 20237 |      |   |
| 117.127514853017    | 75    | 150 | 0     | Open | ; |
| 33312               | 23811 |     | 19815 |      |   |
| 117.335199426715    | 110   | 150 | 0     | Open | ; |
| 33313               | 24642 |     | 23765 |      |   |
| 117.357355900255    | 110   | 150 | 0     | Open | ; |
| 33314               | 19691 |     | 20923 |      |   |
| 117.380788119122    | 110   | 150 | 0     | Open | ; |
| 33315               | 23130 |     | 18872 |      |   |
| 117.389259245353    | 75    | 140 | 0     | Open | ; |
| 33316               | 23882 |     | 22824 |      |   |
| 117.493429830549    | 110   | 150 | 0     | Open | ; |
| 33317               | 23235 |     | 21295 |      |   |
| 117.571013240508    | 75    | 140 | 0     | Open | ; |
| 33318               | 25019 |     | 20946 |      |   |
| 117.577110947215    | 100   | 140 | 0     | Open | ; |
| 33319               | 22138 |     | 22139 |      |   |
| 117.59249502704 110 |       | 150 | 0     | Open | ; |
| 33320               | 22081 |     | 22082 |      |   |
| 117.631385262941    | 226   | 150 | 0     | Open | ; |
| 33321               | 24824 |     | 24889 |      |   |
| 117.736280127896    | 200   | 150 | 0     | Open | ; |
| 33322               | 24123 |     | 22247 |      |   |
| 117.794944920957    | 75    | 150 | 0     | Open | ; |
| 33323               | 18632 |     | 19817 |      |   |
| 117.877000739226    | 250   | 140 | 0     | Open | ; |
| 33324               | 21393 |     | 21394 |      |   |



|                     |       |     |       |      |   |
|---------------------|-------|-----|-------|------|---|
| 117.99317354167 75  |       | 140 | 0     | Open | ; |
| 33325               | 21392 |     | 18487 |      |   |
| 117.987444136564    | 75    | 140 | 0     | Open | ; |
| 33326               | 20253 |     | 23883 |      |   |
| 117.993211898124    | 75    | 140 | 0     | Open | ; |
| 33327               | 24010 |     | 24011 |      |   |
| 118.035740513661    | 75    | 150 | 0     | Open | ; |
| 33328               | 22506 |     | 19631 |      |   |
| 118.12978612082 110 |       | 150 | 0     | Open | ; |
| 33329               | 22530 |     | 22528 |      |   |
| 118.129809415704    | 110   | 150 | 0     | Open | ; |
| 33330               | 20292 |     | 20293 |      |   |
| 118.184707529148    | 150   | 140 | 0     | Open | ; |
| 33331               | 20149 |     | 20150 |      |   |
| 118.374432896909    | 110   | 150 | 0     | Open | ; |
| 33332               | 22072 |     | 22537 |      |   |
| 135.549235637253    | 500   | 150 | 0     | Open | ; |
| 33333               | 24532 |     | 24530 |      |   |
| 118.550130579195    | 110   | 150 | 0     | Open | ; |
| 33334               | 22878 |     | 20551 |      |   |
| 118.77100666533 110 |       | 150 | 0     | Open | ; |
| 33335               | 21480 |     | 24983 |      |   |
| 118.850032849717    | 110   | 150 | 0     | Open | ; |
| 33336               | 21263 |     | 21118 |      |   |
| 118.935675400179    | 100   | 140 | 0     | Open | ; |
| 33337               | 24939 |     | 20264 |      |   |
| 121.741252735739    | 250   | 140 | 0     | Open | ; |
| 33338               | 23025 |     | 23122 |      |   |
| 118.992827357125    | 100   | 100 | 0     | Open | ; |
| 33339               | 18709 |     | 23440 |      |   |
| 119.005160782595    | 75    | 140 | 0     | Open | ; |
| 33340               | 24207 |     | 19032 |      |   |
| 145.927218718372    | 110   | 150 | 0     | Open | ; |
| 33341               | 22745 |     | 21617 |      |   |
| 119.197484131374    | 110   | 150 | 0     | Open | ; |
| 33342               | 21295 |     | 24170 |      |   |
| 119.24218032364 75  |       | 140 | 0     | Open | ; |
| 33343               | 22813 |     | 20792 |      |   |
| 119.293317844457    | 110   | 150 | 0     | Open | ; |
| 33344               | 19319 |     | 19320 |      |   |
| 119.377892320069    | 75    | 140 | 0     | Open | ; |
| 33345               | 23943 |     | 20277 |      |   |
| 157.127914916501    | 100   | 140 | 0     | Open | ; |
| 33346               | 21084 |     | 19234 |      |   |
| 124.926174592988    | 110   | 150 | 0     | Open | ; |
| 33347               | 19417 |     | 21351 |      |   |
| 120.637536170421    | 160   | 150 | 0     | Open | ; |
| 33348               | 21102 |     | 21103 |      |   |
| 119.610052794567    | 400   | 130 | 0     | Open | ; |
| 33349               | 19321 |     | 19322 |      |   |

|                     |       |     |       |      |   |
|---------------------|-------|-----|-------|------|---|
| 119.804108519416    | 75    | 140 | 0     | Open | ; |
| 33350               | 19269 |     | 21911 |      |   |
| 119.803566924581    | 110   | 150 | 0     | Open | ; |
| 33351               | 21781 |     | 21782 |      |   |
| 119.871041086438    | 75    | 140 | 0     | Open | ; |
| 33352               | 21717 |     | 24095 |      |   |
| 120.097054011123    | 75    | 140 | 0     | Open | ; |
| 33353               | 22253 |     | 23619 |      |   |
| 152.154322701672    | 110   | 150 | 0     | Open | ; |
| 33354               | 20937 |     | 20667 |      |   |
| 120.1298105117 110  |       | 150 | 0     | Open | ; |
| 33355               | 22991 |     | 20762 |      |   |
| 120.129810510749    | 110   | 150 | 0     | Open | ; |
| 33356               | 19624 |     | 20566 |      |   |
| 120.129829082278    | 110   | 150 | 0     | Open | ; |
| 33357               | 22990 |     | 20668 |      |   |
| 120.12982908245 110 |       | 150 | 0     | Open | ; |
| 33359               | 20908 |     | 24290 |      |   |
| 120.225307343938    | 150   | 130 | 0     | Open | ; |
| 33360               | 21812 |     | 24240 |      |   |
| 120.251605211819    | 110   | 150 | 0     | Open | ; |
| 33361               | 24092 |     | 25034 |      |   |
| 120.254186173946    | 250   | 140 | 0     | Open | ; |
| 33362               | 20547 |     | 20548 |      |   |
| 120.25759547381 100 |       | 140 | 0     | Open | ; |
| 33363               | 23233 |     | 24217 |      |   |
| 120.266233096784    | 75    | 150 | 0     | Open | ; |
| 33364               | 19037 |     | 20717 |      |   |
| 120.280369992742    | 100   | 140 | 0     | Open | ; |
| 33365               | 21405 |     | 19555 |      |   |
| 120.305291497028    | 150   | 140 | 0     | Open | ; |
| 33366               | 22370 |     | 22371 |      |   |
| 120.465718498829    | 110   | 150 | 0     | Open | ; |
| 33367               | 23023 |     | 18555 |      |   |
| 120.731882301373    | 110   | 150 | 0     | Open | ; |
| 33368               | 18916 |     | 24171 |      |   |
| 123.55955671401 150 |       | 140 | 0     | Open | ; |
| 33369               | 20948 |     | 19199 |      |   |
| 120.989824682457    | 75    | 150 | 0     | Open | ; |
| 33370               | 18524 |     | 24282 |      |   |
| 121.063811537915    | 200   | 150 | 0     | Open | ; |
| 33371               | 19805 |     | 20294 |      |   |
| 121.092730018073    | 110   | 150 | 0     | Open | ; |
| 33372               | 18766 |     | 18767 |      |   |
| 121.162860810233    | 100   | 140 | 0     | Open | ; |
| 33373               | 19468 |     | 19469 |      |   |
| 121.167288997786    | 100   | 140 | 0     | Open | ; |
| 33374               | 19543 |     | 19542 |      |   |
| 122.037897215477    | 110   | 150 | 0     | Open | ; |
| 33375               | 20928 |     | 21655 |      |   |

|                     |       |     |       |      |   |
|---------------------|-------|-----|-------|------|---|
| 121.252911438468    | 75    | 140 | 0     | Open | ; |
| 33376               | 18632 |     | 21531 |      |   |
| 121.299397439046    | 250   | 140 | 0     | Open | ; |
| 33377               | 24370 |     | 23724 |      |   |
| 121.342864534841    | 150   | 140 | 0     | Open | ; |
| 33378               | 22052 |     | 19943 |      |   |
| 121.543405272045    | 110   | 150 | 0     | Open | ; |
| 33379               | 22514 |     | 23161 |      |   |
| 121.593217051785    | 110   | 150 | 0     | Open | ; |
| 33380               | 18780 |     | 18781 |      |   |
| 121.660297940399    | 110   | 150 | 0     | Open | ; |
| 33381               | 20916 |     | 23862 |      |   |
| 121.669422680248    | 250   | 100 | 0     | Open | ; |
| 33382               | 22651 |     | 20514 |      |   |
| 121.733040838936    | 100   | 140 | 0     | Open | ; |
| 33383               | 21607 |     | 21604 |      |   |
| 121.767489047383    | 110   | 150 | 0     | Open | ; |
| 33384               | 23827 |     | 22175 |      |   |
| 123.051119215789    | 500   | 140 | 0     | Open | ; |
| 33385               | 21228 |     | 21229 |      |   |
| 121.99295455879 110 |       | 150 | 0     | Open | ; |
| 33386               | 22356 |     | 20794 |      |   |
| 121.868392766493    | 110   | 150 | 0     | Open | ; |
| 33387               | 18665 |     | 18666 |      |   |
| 121.90488770645 110 |       | 150 | 0     | Open | ; |
| 33388               | 19021 |     | 24190 |      |   |
| 121.987997629789    | 150   | 140 | 0     | Open | ; |
| 33389               | 22079 |     | 25027 |      |   |
| 121.999368397955    | 110   | 150 | 0     | Open | ; |
| 33390               | 20818 |     | 22551 |      |   |
| 122.028477316454    | 100   | 140 | 0     | Open | ; |
| 33391               | 24407 |     | 24408 |      |   |
| 122.097151700256    | 110   | 150 | 0     | Open | ; |
| 33392               | 18568 |     | 20678 |      |   |
| 122.129816332374    | 110   | 150 | 0     | Open | ; |
| 33393               | 18567 |     | 20767 |      |   |
| 122.129816331258    | 110   | 150 | 0     | Open | ; |
| 33394               | 21030 |     | 23029 |      |   |
| 122.193051900867    | 125   | 140 | 0     | Open | ; |
| 33396               | 22253 |     | 23254 |      |   |
| 122.463413863363    | 110   | 150 | 0     | Open | ; |
| 33398               | 24179 |     | 19815 |      |   |
| 151.703652209371    | 110   | 150 | 0     | Open | ; |
| 33399               | 24289 |     | 24945 |      |   |
| 135.955330257758    | 125   | 130 | 0     | Open | ; |
| 33400               | 19559 |     | 23428 |      |   |
| 122.674158981011    | 100   | 100 | 0     | Open | ; |
| 33401               | 21312 |     | 21313 |      |   |
| 122.825028090684    | 100   | 140 | 0     | Open | ; |
| 33402               | 24193 |     | 23672 |      |   |

|                     |       |     |       |      |   |
|---------------------|-------|-----|-------|------|---|
| 174.39717697581 75  |       | 140 | 0     | Open | ; |
| 33403               | 18510 |     | 22317 |      |   |
| 122.803912376182    | 140   | 150 | 0     | Open | ; |
| 33404               | 23934 |     | 23935 |      |   |
| 122.926744938135    | 110   | 150 | 0     | Open | ; |
| 33405               | 23808 |     | 18964 |      |   |
| 122.960842146946    | 200   | 100 | 0     | Open | ; |
| 33406               | 21490 |     | 18920 |      |   |
| 123.06764945821 250 |       | 140 | 0     | Open | ; |
| 33407               | 24012 |     | 24013 |      |   |
| 123.071219770507    | 75    | 150 | 0     | Open | ; |
| 33408               | 20402 |     | 24823 |      |   |
| 123.120857780215    | 200   | 150 | 0     | Open | ; |
| 33409               | 20804 |     | 22941 |      |   |
| 123.148451410427    | 100   | 140 | 0     | Open | ; |
| 33410               | 18641 |     | 18642 |      |   |
| 123.150564776829    | 250   | 140 | 0     | Open | ; |
| 33411               | 20140 |     | 21533 |      |   |
| 123.292941249581    | 100   | 100 | 0     | Open | ; |
| 33412               | 23146 |     | 21451 |      |   |
| 146.643266023675    | 75    | 140 | 0     | Open | ; |
| 33413               | 24036 |     | 22176 |      |   |
| 125.662526688394    | 315   | 150 | 0     | Open | ; |
| 33414               | 24715 |     | 24716 |      |   |
| 123.354344670336    | 110   | 150 | 0     | Open | ; |
| 33415               | 18752 |     | 18753 |      |   |
| 123.365388216763    | 100   | 140 | 0     | Open | ; |
| 33416               | 18918 |     | 18919 |      |   |
| 123.375413747449    | 300   | 140 | 0     | Open | ; |
| 33417               | 21665 |     | 24855 |      |   |
| 123.457890430994    | 200   | 140 | 0     | Open | ; |
| 33418               | 19122 |     | 21818 |      |   |
| 123.544870891499    | 250   | 100 | 0     | Open | ; |
| 33419               | 24258 |     | 22317 |      |   |
| 123.68191996334 140 |       | 150 | 0     | Open | ; |
| 33420               | 19664 |     | 19027 |      |   |
| 123.842743560345    | 100   | 140 | 0     | Open | ; |
| 33421               | 22165 |     | 19637 |      |   |
| 128.246668318855    | 110   | 150 | 0     | Open | ; |
| 33422               | 22561 |     | 21002 |      |   |
| 123.866105975645    | 200   | 150 | 0     | Open | ; |
| 33423               | 20326 |     | 20327 |      |   |
| 123.974247716874    | 110   | 150 | 0     | Open | ; |
| 33424               | 19527 |     | 23993 |      |   |
| 123.99292584239 110 |       | 150 | 0     | Open | ; |
| 33425               | 24985 |     | 23880 |      |   |
| 125.258660341525    | 160   | 150 | 0     | Open | ; |
| 33426               | 23841 |     | 20719 |      |   |
| 124.051445466144    | 300   | 140 | 0     | Open | ; |
| 33427               | 24907 |     | 18715 |      |   |

|                     |       |     |       |      |   |
|---------------------|-------|-----|-------|------|---|
| 128.950782117595    | 110   | 150 | 0     | Open | ; |
| 33428               | 21676 |     | 21677 |      |   |
| 124.15107895527 110 |       | 150 | 0     | Open | ; |
| 33429               | 21859 |     | 23025 |      |   |
| 124.169825445986    | 100   | 100 | 0     | Open | ; |
| 33430               | 21932 |     | 19090 |      |   |
| 124.24117028964 75  |       | 150 | 0     | Open | ; |
| 33431               | 22027 |     | 22752 |      |   |
| 124.306535287971    | 110   | 150 | 0     | Open | ; |
| 33432               | 22575 |     | 23480 |      |   |
| 124.3095332684 250  |       | 100 | 0     | Open | ; |
| 33433               | 19020 |     | 24940 |      |   |
| 124.349305303938    | 250   | 140 | 0     | Open | ; |
| 33434               | 24187 |     | 19558 |      |   |
| 124.417582413478    | 250   | 100 | 0     | Open | ; |
| 33435               | 22133 |     | 18511 |      |   |
| 124.893809508318    | 450   | 100 | 0     | Open | ; |
| 33436               | 18781 |     | 19963 |      |   |
| 124.52529604136 110 |       | 150 | 0     | Open | ; |
| 33437               | 25030 |     | 20688 |      |   |
| 126.033115186349    | 110   | 150 | 0     | Open | ; |
| 33439               | 22960 |     | 24107 |      |   |
| 124.694478976497    | 110   | 150 | 0     | Open | ; |
| 33440               | 22838 |     | 23134 |      |   |
| 125.011362515713    | 150   | 140 | 0     | Open | ; |
| 33441               | 21531 |     | 21532 |      |   |
| 124.992837622844    | 250   | 140 | 0     | Open | ; |
| 33442               | 21486 |     | 24976 |      |   |
| 126.992907030225    | 200   | 150 | 0     | Open | ; |
| 33443               | 18750 |     | 18751 |      |   |
| 125.360008846754    | 100   | 140 | 0     | Open | ; |
| 33444               | 23685 |     | 23686 |      |   |
| 125.468871362393    | 100   | 140 | 0     | Open | ; |
| 33445               | 23717 |     | 20729 |      |   |
| 125.473322375382    | 75    | 150 | 0     | Open | ; |
| 33446               | 19856 |     | 19867 |      |   |
| 125.475592816826    | 160   | 150 | 0     | Open | ; |
| 33447               | 19560 |     | 23069 |      |   |
| 125.484671487134    | 150   | 140 | 0     | Open | ; |
| 33448               | 19530 |     | 19531 |      |   |
| 125.641436116122    | 110   | 150 | 0     | Open | ; |
| 33449               | 23161 |     | 19681 |      |   |
| 152.551828548122    | 110   | 150 | 0     | Open | ; |
| 33450               | 21532 |     | 22522 |      |   |
| 125.992987619541    | 250   | 140 | 0     | Open | ; |
| 33451               | 22344 |     | 22345 |      |   |
| 125.728090866254    | 110   | 150 | 0     | Open | ; |
| 33452               | 23258 |     | 23257 |      |   |
| 125.748004113423    | 140   | 150 | 0     | Open | ; |
| 33453               | 20228 |     | 18955 |      |   |

|                     |       |     |       |      |   |
|---------------------|-------|-----|-------|------|---|
| 160.478133645149    | 110   | 150 | 0     | Open | ; |
| 33454               | 18573 |     | 22572 |      |   |
| 125.981176196003    | 110   | 150 | 0     | Open | ; |
| 33455               | 24222 |     | 22023 |      |   |
| 125.987538590118    | 125   | 150 | 0     | Open | ; |
| 33456               | 19811 |     | 19812 |      |   |
| 125.992953760699    | 75    | 140 | 0     | Open | ; |
| 33457               | 19191 |     | 19192 |      |   |
| 125.993530888721    | 75    | 140 | 0     | Open | ; |
| 33458               | 21699 |     | 21700 |      |   |
| 126.199227537754    | 110   | 150 | 0     | Open | ; |
| 33459               | 25052 |     | 20872 |      |   |
| 131.920520968679    | 75    | 140 | 0     | Open | ; |
| 33460               | 21780 |     | 24082 |      |   |
| 126.364465982399    | 110   | 150 | 0     | Open | ; |
| 33461               | 23306 |     | 21774 |      |   |
| 126.567525570333    | 250   | 100 | 0     | Open | ; |
| 33462               | 23718 |     | 23719 |      |   |
| 126.664757367253    | 75    | 150 | 0     | Open | ; |
| 33463               | 21098 |     | 21099 |      |   |
| 126.684543839218    | 110   | 150 | 0     | Open | ; |
| 33464               | 20000 |     | 25020 |      |   |
| 128.478497130955    | 140   | 150 | 0     | Open | ; |
| 33465               | 21813 |     | 19325 |      |   |
| 126.77757442837 300 |       | 140 | 0     | Open | ; |
| 33466               | 21988 |     | 21989 |      |   |
| 126.982769481083    | 110   | 150 | 0     | Open | ; |
| 33467               | 23596 |     | 21929 |      |   |
| 126.992790273219    | 110   | 150 | 0     | Open | ; |
| 33468               | 19355 |     | 18577 |      |   |
| 126.997306310435    | 110   | 150 | 0     | Open | ; |
| 33470               | 21225 |     | 21226 |      |   |
| 127.159862150009    | 110   | 150 | 0     | Open | ; |
| 33471               | 21414 |     | 21415 |      |   |
| 127.175086410621    | 100   | 140 | 0     | Open | ; |
| 33472               | 24893 |     | 25703 |      |   |
| 127.65258623453 100 |       | 140 | 0     | Open | ; |
| 33473               | 19117 |     | 19074 |      |   |
| 127.549998212801    | 125   | 150 | 0     | Open | ; |
| 33474               | 23379 |     | 22169 |      |   |
| 145.059145590065    | 140   | 150 | 0     | Open | ; |
| 33475               | 21071 |     | 21072 |      |   |
| 127.641681157573    | 75    | 150 | 0     | Open | ; |
| 33476               | 21728 |     | 21379 |      |   |
| 127.749511070017    | 140   | 150 | 0     | Open | ; |
| 33477               | 23610 |     | 23611 |      |   |
| 127.992671811114    | 75    | 150 | 0     | Open | ; |
| 33478               | 23608 |     | 23609 |      |   |
| 127.994156082289    | 75    | 150 | 0     | Open | ; |
| 33479               | 22749 |     | 23414 |      |   |

|                     |       |     |       |      |   |
|---------------------|-------|-----|-------|------|---|
| 128.081065230853    | 110   | 150 | 0     | Open | ; |
| 33480               | 22077 |     | 22303 |      |   |
| 128.16710314317 250 |       | 140 | 0     | Open | ; |
| 33481               | 22083 |     | 22731 |      |   |
| 128.32353565773 100 |       | 140 | 0     | Open | ; |
| 33482               | 23504 |     | 23505 |      |   |
| 128.304471728238    | 226   | 150 | 0     | Open | ; |
| 33483               | 22988 |     | 24987 |      |   |
| 182.181569029393    | 110   | 150 | 0     | Open | ; |
| 33484               | 24151 |     | 20339 |      |   |
| 128.380996841698    | 200   | 150 | 0     | Open | ; |
| 33485               | 18571 |     | 25060 |      |   |
| 142.89935098185 110 |       | 150 | 0     | Open | ; |
| 33486               | 23186 |     | 24450 |      |   |
| 128.410452514188    | 110   | 150 | 0     | Open | ; |
| 33487               | 24196 |     | 19301 |      |   |
| 128.571248206864    | 110   | 150 | 0     | Open | ; |
| 33488               | 24708 |     | 23167 |      |   |
| 128.607293515334    | 110   | 150 | 0     | Open | ; |
| 33489               | 24063 |     | 19719 |      |   |
| 128.788986279219    | 110   | 150 | 0     | Open | ; |
| 33490               | 22163 |     | 22849 |      |   |
| 129.363929231803    | 150   | 140 | 0     | Open | ; |
| 33491               | 24853 |     | 20579 |      |   |
| 128.904757594422    | 150   | 140 | 0     | Open | ; |
| 33492               | 20695 |     | 20698 |      |   |
| 129.269675882412    | 75    | 150 | 0     | Open | ; |
| 33493               | 22568 |     | 25001 |      |   |
| 129.589502606817    | 110   | 150 | 0     | Open | ; |
| 33494               | 20618 |     | 20619 |      |   |
| 129.660374946021    | 110   | 150 | 0     | Open | ; |
| 33495               | 23465 |     | 23466 |      |   |
| 129.993571122005    | 110   | 150 | 0     | Open | ; |
| 33496               | 22025 |     | 19647 |      |   |
| 129.992489320979    | 125   | 140 | 0     | Open | ; |
| 33497               | 19924 |     | 19925 |      |   |
| 130.079545325696    | 75    | 150 | 0     | Open | ; |
| 33498               | 21728 |     | 19897 |      |   |
| 171.479812464782    | 110   | 150 | 0     | Open | ; |
| 33499               | 24097 |     | 24993 |      |   |
| 132.345260295714    | 110   | 150 | 0     | Open | ; |
| 33500               | 24439 |     | 24695 |      |   |
| 130.132834540796    | 160   | 150 | 0     | Open | ; |
| 33501               | 21538 |     | 23685 |      |   |
| 130.696564171173    | 100   | 140 | 0     | Open | ; |
| 33502               | 18521 |     | 18522 |      |   |
| 130.992504791508    | 75    | 140 | 0     | Open | ; |
| 33503               | 18639 |     | 23583 |      |   |
| 131.096589384901    | 100   | 140 | 0     | Open | ; |
| 33504               | 18838 |     | 22021 |      |   |

|                     |       |     |       |      |   |
|---------------------|-------|-----|-------|------|---|
| 131.106134230656    | 125   | 150 | 0     | Open | ; |
| 33505               | 20011 |     | 24144 |      |   |
| 131.153380529682    | 250   | 140 | 0     | Open | ; |
| 33506               | 19238 |     | 19239 |      |   |
| 131.26117040834 110 |       | 150 | 0     | Open | ; |
| 33507               | 19222 |     | 21919 |      |   |
| 131.322632044778    | 75    | 150 | 0     | Open | ; |
| 33508               | 22825 |     | 25024 |      |   |
| 131.511366974754    | 100   | 140 | 0     | Open | ; |
| 33509               | 23593 |     | 24152 |      |   |
| 131.588938255881    | 250   | 100 | 0     | Open | ; |
| 33510               | 24255 |     | 21226 |      |   |
| 172.102170425436    | 110   | 150 | 0     | Open | ; |
| 33511               | 24106 |     | 22674 |      |   |
| 131.70646919666 100 |       | 140 | 0     | Open | ; |
| 33512               | 20426 |     | 20575 |      |   |
| 131.742674818933    | 110   | 150 | 0     | Open | ; |
| 33513               | 21765 |     | 18962 |      |   |
| 131.845074032655    | 200   | 140 | 0     | Open | ; |
| 33514               | 18641 |     | 24092 |      |   |
| 131.895723019658    | 250   | 140 | 0     | Open | ; |
| 33515               | 20307 |     | 20308 |      |   |
| 131.933523920609    | 110   | 150 | 0     | Open | ; |
| 33516               | 22785 |     | 20694 |      |   |
| 131.969711307899    | 110   | 150 | 0     | Open | ; |
| 33517               | 19283 |     | 19284 |      |   |
| 131.993875969244    | 125   | 140 | 0     | Open | ; |
| 33518               | 22030 |     | 22586 |      |   |
| 141.931137380857    | 125   | 150 | 0     | Open | ; |
| 33519               | 19118 |     | 18764 |      |   |
| 132.132686042949    | 125   | 150 | 0     | Open | ; |
| 33520               | 22354 |     | 20704 |      |   |
| 132.42995067995 110 |       | 150 | 0     | Open | ; |
| 33521               | 20231 |     | 20232 |      |   |
| 132.433035831939    | 100   | 140 | 0     | Open | ; |
| 33522               | 23400 |     | 24229 |      |   |
| 142.764819605342    | 75    | 140 | 0     | Open | ; |
| 33523               | 19978 |     | 21308 |      |   |
| 132.764409041726    | 110   | 150 | 0     | Open | ; |
| 33524               | 24335 |     | 22761 |      |   |
| 133.277256453768    | 315   | 150 | 0     | Open | ; |
| 33525               | 22477 |     | 22741 |      |   |
| 132.892849945318    | 110   | 150 | 0     | Open | ; |
| 33526               | 25034 |     | 22610 |      |   |
| 156.279238316275    | 250   | 140 | 0     | Open | ; |
| 33527               | 25678 |     | 25000 |      |   |
| 156.238629654323    | 110   | 150 | 0     | Open | ; |
| 33528               | 25133 |     | 24589 |      |   |
| 163.057765264621    | 110   | 150 | 0     | Open | ; |
| 33529               | 20917 |     | 19557 |      |   |



|                     |       |     |       |      |   |
|---------------------|-------|-----|-------|------|---|
| 133.494587710432    | 75    | 140 | 0     | Open | ; |
| 33530               | 21073 |     | 21074 |      |   |
| 133.823618810691    | 75    | 150 | 0     | Open | ; |
| 33531               | 24827 |     | 24826 |      |   |
| 165.103350709732    | 110   | 150 | 0     | Open | ; |
| 33532               | 24141 |     | 24990 |      |   |
| 133.99229950322 75  |       | 140 | 0     | Open | ; |
| 33533               | 24224 |     | 23720 |      |   |
| 169.549606833571    | 110   | 150 | 0     | Open | ; |
| 33534               | 19400 |     | 23287 |      |   |
| 171.007952159157    | 110   | 150 | 0     | Open | ; |
| 33535               | 22388 |     | 22201 |      |   |
| 134.244514683081    | 110   | 150 | 0     | Open | ; |
| 33536               | 21858 |     | 21859 |      |   |
| 134.615228947385    | 150   | 100 | 0     | Open | ; |
| 33537               | 19186 |     | 18839 |      |   |
| 134.692933155653    | 110   | 150 | 0     | Open | ; |
| 33538               | 22888 |     | 22879 |      |   |
| 134.892167623663    | 110   | 150 | 0     | Open | ; |
| 33539               | 22738 |     | 22878 |      |   |
| 134.89223534514 110 |       | 150 | 0     | Open | ; |
| 33540               | 22784 |     | 20334 |      |   |
| 134.892235344922    | 110   | 150 | 0     | Open | ; |
| 33541               | 22740 |     | 21580 |      |   |
| 134.892235344925    | 110   | 150 | 0     | Open | ; |
| 33542               | 22739 |     | 20307 |      |   |
| 134.892235345251    | 110   | 150 | 0     | Open | ; |
| 33543               | 18665 |     | 24913 |      |   |
| 134.92730059045 150 |       | 140 | 0     | Open | ; |
| 33544               | 21819 |     | 22652 |      |   |
| 134.967967080192    | 250   | 140 | 0     | Open | ; |
| 33545               | 22612 |     | 22627 |      |   |
| 135.024169703442    | 110   | 150 | 0     | Open | ; |
| 33546               | 24457 |     | 24704 |      |   |
| 168.646733065193    | 110   | 150 | 0     | Open | ; |
| 33547               | 23797 |     | 22051 |      |   |
| 136.72399454445 110 |       | 150 | 0     | Open | ; |
| 33548               | 24946 |     | 24114 |      |   |
| 139.872352928949    | 200   | 140 | 0     | Open | ; |
| 33549               | 19778 |     | 19779 |      |   |
| 135.992229639555    | 110   | 150 | 0     | Open | ; |
| 33550               | 19172 |     | 19173 |      |   |
| 136.00263503941 110 |       | 150 | 0     | Open | ; |
| 33551               | 24206 |     | 24718 |      |   |
| 136.022905264476    | 150   | 140 | 0     | Open | ; |
| 33552               | 19811 |     | 23293 |      |   |
| 173.989194658229    | 75    | 140 | 0     | Open | ; |
| 33553               | 21192 |     | 24348 |      |   |
| 193.988975322447    | 100   | 140 | 0     | Open | ; |
| 33554               | 19660 |     | 23644 |      |   |

|                  |       |     |       |      |   |
|------------------|-------|-----|-------|------|---|
| 136.543566878647 | 110   | 150 | 0     | Open | ; |
| 33555            | 24294 |     | 23102 |      |   |
| 136.629098504828 | 100   | 140 | 0     | Open | ; |
| 33556            | 21264 |     | 21265 |      |   |
| 136.734970098192 | 125   | 150 | 0     | Open | ; |
| 33557            | 22326 |     | 21203 |      |   |
| 136.745535925398 | 125   | 150 | 0     | Open | ; |
| 33558            | 24142 |     | 24146 |      |   |
| 136.985401091321 | 125   | 140 | 0     | Open | ; |
| 33559            | 23084 |     | 23279 |      |   |
| 152.993043604365 | 100   | 140 | 0     | Open | ; |
| 33560            | 22357 |     | 19157 |      |   |
| 149.991540835187 | 125   | 150 | 0     | Open | ; |
| 33561            | 19082 |     | 24715 |      |   |
| 139.595891866536 | 110   | 150 | 0     | Open | ; |
| 33562            | 24143 |     | 24168 |      |   |
| 137.887011868595 | 100   | 140 | 0     | Open | ; |
| 33563            | 20513 |     | 24252 |      |   |
| 137.908721535996 | 200   | 140 | 0     | Open | ; |
| 33564            | 22882 |     | 22986 |      |   |
| 137.902816414718 | 110   | 150 | 0     | Open | ; |
| 33565            | 19850 |     | 19851 |      |   |
| 138.324247148284 | 150   | 140 | 0     | Open | ; |
| 33566            | 21349 |     | 22066 |      |   |
| 141.324647783547 | 450   | 130 | 0     | Open | ; |
| 33567            | 24337 |     | 23970 |      |   |
| 138.361691023056 | 75    | 140 | 0     | Open | ; |
| 33568            | 25142 |     | 22976 |      |   |
| 138.382926456284 | 125   | 150 | 0     | Open | ; |
| 33569            | 25151 |     | 21819 |      |   |
| 138.540228940345 | 250   | 140 | 0     | Open | ; |
| 33571            | 21279 |     | 21280 |      |   |
| 139.064616922317 | 200   | 140 | 0     | Open | ; |
| 33572            | 24646 |     | 22621 |      |   |
| 138.99290161818  | 160   | 150 | 0     | Open | ; |
| 33573            | 22566 |     | 22567 |      |   |
| 139.201516609478 | 75    | 140 | 0     | Open | ; |
| 33574            | 19771 |     | 21717 |      |   |
| 139.565987393151 | 250   | 140 | 0     | Open | ; |
| 33575            | 23971 |     | 22456 |      |   |
| 139.607927766791 | 100   | 140 | 0     | Open | ; |
| 33576            | 20949 |     | 24895 |      |   |
| 186.002037310878 | 125   | 150 | 0     | Open | ; |
| 33577            | 21810 |     | 21811 |      |   |
| 139.706708809918 | 250   | 100 | 0     | Open | ; |
| 33578            | 20768 |     | 23504 |      |   |
| 139.745885254536 | 226   | 150 | 0     | Open | ; |
| 33579            | 23911 |     | 22565 |      |   |
| 139.960300127915 | 75    | 140 | 0     | Open | ; |
| 33580            | 19690 |     | 23825 |      |   |

|                    |       |     |       |      |   |
|--------------------|-------|-----|-------|------|---|
| 139.992128899293   | 300   | 140 | 0     | Open | ; |
| 33581              | 24904 |     | 22772 |      |   |
| 140.534068132682   | 110   | 150 | 0     | Open | ; |
| 33582              | 23565 |     | 19958 |      |   |
| 148.280786663105   | 160   | 150 | 0     | Open | ; |
| 33583              | 20175 |     | 20176 |      |   |
| 140.644135000755   | 100   | 140 | 0     | Open | ; |
| 33584              | 24081 |     | 24268 |      |   |
| 140.99177703825 75 |       | 150 | 0     | Open | ; |
| 33585              | 23521 |     | 23522 |      |   |
| 140.992148348504   | 110   | 150 | 0     | Open | ; |
| 33586              | 25032 |     | 20416 |      |   |
| 141.392407614874   | 110   | 150 | 0     | Open | ; |
| 33587              | 20790 |     | 20786 |      |   |
| 141.376138129854   | 100   | 140 | 0     | Open | ; |
| 33588              | 18860 |     | 24210 |      |   |
| 141.397157254177   | 125   | 140 | 0     | Open | ; |
| 33589              | 21347 |     | 21348 |      |   |
| 141.79211663832 75 |       | 140 | 0     | Open | ; |
| 33590              | 25029 |     | 22690 |      |   |
| 170.226697133276   | 110   | 150 | 0     | Open | ; |
| 33591              | 24813 |     | 20595 |      |   |
| 141.874002645539   | 100   | 140 | 0     | Open | ; |
| 33592              | 19514 |     | 23917 |      |   |
| 143.594566998432   | 110   | 150 | 0     | Open | ; |
| 33593              | 20082 |     | 19530 |      |   |
| 142.790758886064   | 110   | 150 | 0     | Open | ; |
| 33594              | 22687 |     | 22077 |      |   |
| 142.989360192688   | 250   | 100 | 0     | Open | ; |
| 33595              | 19111 |     | 19112 |      |   |
| 143.006827335175   | 125   | 150 | 0     | Open | ; |
| 33596              | 19666 |     | 24856 |      |   |
| 143.121871142067   | 75    | 140 | 0     | Open | ; |
| 33597              | 22879 |     | 22880 |      |   |
| 143.228760380421   | 110   | 150 | 0     | Open | ; |
| 33598              | 19860 |     | 19861 |      |   |
| 143.246673302209   | 75    | 150 | 0     | Open | ; |
| 33599              | 20404 |     | 20251 |      |   |
| 178.639148242809   | 110   | 150 | 0     | Open | ; |
| 33600              | 20272 |     | 24300 |      |   |
| 144.241331321305   | 100   | 140 | 0     | Open | ; |
| 33601              | 22953 |     | 18855 |      |   |
| 144.322237041503   | 125   | 140 | 0     | Open | ; |
| 33602              | 20057 |     | 22525 |      |   |
| 144.353674814946   | 100   | 140 | 0     | Open | ; |
| 33603              | 21536 |     | 21537 |      |   |
| 144.493450293307   | 110   | 150 | 0     | Open | ; |
| 33604              | 24336 |     | 20324 |      |   |
| 146.247384394469   | 125   | 150 | 0     | Open | ; |
| 33605              | 20923 |     | 23480 |      |   |

|                  |       |     |       |      |   |
|------------------|-------|-----|-------|------|---|
| 145.687823210905 | 250   | 100 | 0     | Open | ; |
| 33606            | 23819 |     | 22713 |      |   |
| 145.844182242349 | 110   | 150 | 0     | Open | ; |
| 33607            | 24137 |     | 18934 |      |   |
| 146.042671720118 | 110   | 150 | 0     | Open | ; |
| 33608            | 19216 |     | 23647 |      |   |
| 146.462427387332 | 110   | 150 | 0     | Open | ; |
| 33609            | 21244 |     | 19462 |      |   |
| 146.894670454863 | 160   | 150 | 0     | Open | ; |
| 33610            | 24817 |     | 19237 |      |   |
| 146.943908055781 | 125   | 150 | 0     | Open | ; |
| 33611            | 18543 |     | 18544 |      |   |
| 146.991841848466 | 75    | 150 | 0     | Open | ; |
| 33612            | 22086 |     | 23255 |      |   |
| 146.990271875698 | 110   | 150 | 0     | Open | ; |
| 33613            | 19572 |     | 22078 |      |   |
| 146.994118974813 | 110   | 150 | 0     | Open | ; |
| 33614            | 23953 |     | 23954 |      |   |
| 147.017139952487 | 150   | 140 | 0     | Open | ; |
| 33615            | 24641 |     | 25684 |      |   |
| 147.100661226697 | 110   | 150 | 0     | Open | ; |
| 33616            | 22637 |     | 22638 |      |   |
| 147.396036091451 | 110   | 150 | 0     | Open | ; |
| 33617            | 21825 |     | 25066 |      |   |
| 218.815520831275 | 200   | 150 | 0     | Open | ; |
| 33619            | 25031 |     | 19723 |      |   |
| 149.346836856323 | 160   | 150 | 0     | Open | ; |
| 33620            | 20511 |     | 24200 |      |   |
| 183.149923148341 | 125   | 140 | 0     | Open | ; |
| 33621            | 20964 |     | 20965 |      |   |
| 148.991454634055 | 75    | 150 | 0     | Open | ; |
| 33622            | 24969 |     | 24150 |      |   |
| 151.007065955995 | 110   | 150 | 0     | Open | ; |
| 33623            | 21707 |     | 21708 |      |   |
| 149.203975365265 | 110   | 150 | 0     | Open | ; |
| 33624            | 23583 |     | 21689 |      |   |
| 149.378462411467 | 100   | 140 | 0     | Open | ; |
| 33625            | 18832 |     | 24349 |      |   |
| 157.469316145004 | 200   | 150 | 0     | Open | ; |
| 33626            | 24046 |     | 22207 |      |   |
| 149.726224720539 | 110   | 150 | 0     | Open | ; |
| 33627            | 23290 |     | 23291 |      |   |
| 149.933857687217 | 75    | 150 | 0     | Open | ; |
| 33628            | 21230 |     | 24381 |      |   |
| 162.998930464784 | 400   | 130 | 0     | Open | ; |
| 33629            | 22896 |     | 23430 |      |   |
| 150.005530583697 | 160   | 150 | 0     | Open | ; |
| 33630            | 23596 |     | 24177 |      |   |
| 150.330100778164 | 110   | 150 | 0     | Open | ; |
| 33631            | 24194 |     | 25000 |      |   |

|                     |       |     |       |  |      |   |
|---------------------|-------|-----|-------|--|------|---|
| 150.620029654643    | 75    | 140 | 0     |  | Open | ; |
| 33632               | 21580 |     | 20283 |  |      |   |
| 150.79968352984 110 |       | 150 | 0     |  | Open | ; |
| 33633               | 19306 |     | 22597 |  |      |   |
| 150.873716418537    | 125   | 150 | 0     |  | Open | ; |
| 33634               | 23968 |     | 23969 |  |      |   |
| 150.947587294059    | 110   | 150 | 0     |  | Open | ; |
| 33635               | 19983 |     | 19984 |  |      |   |
| 150.991143010068    | 75    | 140 | 0     |  | Open | ; |
| 33636               | 23288 |     | 23289 |  |      |   |
| 151.540053371505    | 75    | 150 | 0     |  | Open | ; |
| 33637               | 19364 |     | 19365 |  |      |   |
| 151.767431619172    | 160   | 150 | 0     |  | Open | ; |
| 33638               | 21339 |     | 21340 |  |      |   |
| 151.782129178505    | 110   | 150 | 0     |  | Open | ; |
| 33639               | 22296 |     | 22297 |  |      |   |
| 151.950872692282    | 100   | 140 | 0     |  | Open | ; |
| 33640               | 24246 |     | 22754 |  |      |   |
| 151.968151892488    | 100   | 140 | 0     |  | Open | ; |
| 33641               | 22632 |     | 18545 |  |      |   |
| 151.991535522558    | 110   | 150 | 0     |  | Open | ; |
| 33642               | 20527 |     | 24853 |  |      |   |
| 152.175935716928    | 75    | 100 | 0     |  | Open | ; |
| 33643               | 22246 |     | 18537 |  |      |   |
| 152.22108364545 100 |       | 140 | 0     |  | Open | ; |
| 33644               | 19470 |     | 19471 |  |      |   |
| 152.287014008802    | 75    | 150 | 0     |  | Open | ; |
| 33645               | 24600 |     | 23945 |  |      |   |
| 162.898133565955    | 250   | 140 | 0     |  | Open | ; |
| 33646               | 18871 |     | 18872 |  |      |   |
| 152.711685473813    | 450   | 130 | 0     |  | Open | ; |
| 33647               | 24850 |     | 24851 |  |      |   |
| 153.141606004462    | 500   | 130 | 0     |  | Open | ; |
| 33648               | 24851 |     | 24852 |  |      |   |
| 153.973390560209    | 560   | 150 | 0     |  | Open | ; |
| 33649               | 19851 |     | 18688 |  |      |   |
| 153.217251571803    | 150   | 140 | 0     |  | Open | ; |
| 33650               | 23480 |     | 21095 |  |      |   |
| 153.449062567248    | 250   | 100 | 0     |  | Open | ; |
| 33651               | 18664 |     | 20085 |  |      |   |
| 153.64243971366 200 |       | 140 | 0     |  | Open | ; |
| 33652               | 19638 |     | 19159 |  |      |   |
| 158.974496791474    | 125   | 150 | 0     |  | Open | ; |
| 33653               | 19508 |     | 19509 |  |      |   |
| 168.821446084378    | 150   | 140 | 0     |  | Open | ; |
| 33654               | 24158 |     | 21762 |  |      |   |
| 154.144655271534    | 110   | 150 | 0     |  | Open | ; |
| 33655               | 21766 |     | 21767 |  |      |   |
| 154.113981510076    | 125   | 140 | 0     |  | Open | ; |
| 33656               | 20383 |     | 20274 |  |      |   |

|                     |       |     |       |      |   |
|---------------------|-------|-----|-------|------|---|
| 154.648823974585    | 200   | 140 | 0     | Open | ; |
| 33657               | 24147 |     | 20903 |      |   |
| 156.906708084337    | 75    | 140 | 0     | Open | ; |
| 33658               | 24584 |     | 20442 |      |   |
| 155.042494067287    | 110   | 150 | 0     | Open | ; |
| 33659               | 24586 |     | 20467 |      |   |
| 155.079456573016    | 110   | 150 | 0     | Open | ; |
| 33660               | 24583 |     | 20353 |      |   |
| 155.142572617442    | 110   | 150 | 0     | Open | ; |
| 33661               | 20808 |     | 23435 |      |   |
| 155.261833650241    | 110   | 150 | 0     | Open | ; |
| 33662               | 22083 |     | 22865 |      |   |
| 155.51200850283 100 |       | 140 | 0     | Open | ; |
| 33663               | 24804 |     | 24926 |      |   |
| 155.687839887277    | 110   | 150 | 0     | Open | ; |
| 33664               | 24805 |     | 24929 |      |   |
| 155.7309542583 110  |       | 150 | 0     | Open | ; |
| 33665               | 22234 |     | 22235 |      |   |
| 155.737472115553    | 110   | 150 | 0     | Open | ; |
| 33666               | 24806 |     | 24931 |      |   |
| 155.772318623212    | 110   | 150 | 0     | Open | ; |
| 33667               | 24807 |     | 24922 |      |   |
| 155.839002586983    | 110   | 150 | 0     | Open | ; |
| 33668               | 22585 |     | 18722 |      |   |
| 158.413217583796    | 160   | 150 | 0     | Open | ; |
| 33669               | 19642 |     | 24091 |      |   |
| 156.000059025384    | 75    | 140 | 0     | Open | ; |
| 33670               | 18496 |     | 21390 |      |   |
| 156.040840753906    | 110   | 150 | 0     | Open | ; |
| 33671               | 18523 |     | 18524 |      |   |
| 156.545928208628    | 200   | 150 | 0     | Open | ; |
| 33672               | 18926 |     | 19073 |      |   |
| 156.585302347914    | 110   | 150 | 0     | Open | ; |
| 33673               | 18925 |     | 22847 |      |   |
| 155.693336959504    | 110   | 150 | 0     | Open | ; |
| 33674               | 19985 |     | 19986 |      |   |
| 156.591025943392    | 75    | 150 | 0     | Open | ; |
| 33675               | 22295 |     | 20351 |      |   |
| 156.637652655764    | 110   | 150 | 0     | Open | ; |
| 33676               | 18924 |     | 22353 |      |   |
| 156.645820116609    | 110   | 150 | 0     | Open | ; |
| 33677               | 24853 |     | 21608 |      |   |
| 157.164635866852    | 150   | 140 | 0     | Open | ; |
| 33678               | 24478 |     | 24479 |      |   |
| 157.619195812802    | 140   | 150 | 0     | Open | ; |
| 33679               | 20373 |     | 20371 |      |   |
| 157.990715384122    | 110   | 150 | 0     | Open | ; |
| 33680               | 21529 |     | 23379 |      |   |
| 157.991216887302    | 140   | 150 | 0     | Open | ; |
| 33681               | 23447 |     | 23448 |      |   |

|                     |       |     |       |      |   |
|---------------------|-------|-----|-------|------|---|
| 158.244480340464    | 150   | 140 | 0     | Open | ; |
| 33682               | 20379 |     | 23951 |      |   |
| 158.361703965787    | 110   | 150 | 0     | Open | ; |
| 33683               | 22887 |     | 21579 |      |   |
| 158.400634818963    | 110   | 150 | 0     | Open | ; |
| 33684               | 21602 |     | 18927 |      |   |
| 158.585223584819    | 140   | 150 | 0     | Open | ; |
| 33685               | 20670 |     | 20671 |      |   |
| 158.989573662014    | 75    | 140 | 0     | Open | ; |
| 33686               | 20377 |     | 20375 |      |   |
| 158.990706727594    | 110   | 150 | 0     | Open | ; |
| 33687               | 22198 |     | 19621 |      |   |
| 159.41360442301 110 |       | 150 | 0     | Open | ; |
| 33689               | 19783 |     | 25021 |      |   |
| 159.932452239232    | 75    | 150 | 0     | Open | ; |
| 33690               | 22042 |     | 22043 |      |   |
| 159.990821751513    | 110   | 150 | 0     | Open | ; |
| 33691               | 18979 |     | 23537 |      |   |
| 159.990827039603    | 110   | 150 | 0     | Open | ; |
| 33692               | 20888 |     | 20889 |      |   |
| 159.991228039474    | 110   | 150 | 0     | Open | ; |
| 33693               | 23245 |     | 23243 |      |   |
| 159.991038034104    | 110   | 150 | 0     | Open | ; |
| 33694               | 22004 |     | 19945 |      |   |
| 159.991054400327    | 75    | 140 | 0     | Open | ; |
| 33695               | 23676 |     | 23674 |      |   |
| 160.050920240825    | 110   | 150 | 0     | Open | ; |
| 33696               | 22762 |     | 22763 |      |   |
| 160.10454819699 110 |       | 150 | 0     | Open | ; |
| 33697               | 22667 |     | 21277 |      |   |
| 152.393712426284    | 125   | 140 | 0     | Open | ; |
| 33698               | 24036 |     | 23636 |      |   |
| 160.270979468801    | 350   | 140 | 0     | Open | ; |
| 33699               | 24464 |     | 24463 |      |   |
| 160.942534249188    | 110   | 150 | 0     | Open | ; |
| 33700               | 25048 |     | 20488 |      |   |
| 189.444311385266    | 350   | 140 | 0     | Open | ; |
| 33701               | 18528 |     | 20139 |      |   |
| 160.971592601807    | 110   | 150 | 0     | Open | ; |
| 33702               | 20395 |     | 22704 |      |   |
| 160.990767691087    | 110   | 150 | 0     | Open | ; |
| 33703               | 19584 |     | 19145 |      |   |
| 160.990786261358    | 110   | 150 | 0     | Open | ; |
| 33704               | 18932 |     | 20742 |      |   |
| 162.012422915109    | 500   | 130 | 0     | Open | ; |
| 33705               | 20318 |     | 21888 |      |   |
| 162.490819725178    | 110   | 150 | 0     | Open | ; |
| 33706               | 21548 |     | 19841 |      |   |
| 162.542471834203    | 110   | 150 | 0     | Open | ; |
| 33707               | 21400 |     | 22281 |      |   |

|                  |       |     |       |      |   |
|------------------|-------|-----|-------|------|---|
| 162.590922501666 | 200   | 150 | 0     | Open | ; |
| 33708            | 23402 |     | 20458 |      |   |
| 162.648857088188 | 100   | 140 | 0     | Open | ; |
| 33709            | 20693 |     | 18835 |      |   |
| 165.690511347249 | 160   | 150 | 0     | Open | ; |
| 33710            | 23221 |     | 23222 |      |   |
| 162.990295387329 | 100   | 100 | 0     | Open | ; |
| 33711            | 21529 |     | 18912 |      |   |
| 199.0060980523   | 140   | 150 | 0     | Open | ; |
| 33712            | 19730 |     | 24642 |      |   |
| 316.846818368493 | 110   | 150 | 0     | Open | ; |
| 33713            | 24943 |     | 23432 |      |   |
| 164.607751069687 | 200   | 150 | 0     | Open | ; |
| 33714            | 20898 |     | 20899 |      |   |
| 164.236286643952 | 250   | 140 | 0     | Open | ; |
| 33715            | 24840 |     | 24862 |      |   |
| 164.667203584099 | 110   | 150 | 0     | Open | ; |
| 33716            | 19498 |     | 22851 |      |   |
| 165.114720921408 | 100   | 140 | 0     | Open | ; |
| 33717            | 23007 |     | 19104 |      |   |
| 165.799677149167 | 75    | 150 | 0     | Open | ; |
| 33718            | 23949 |     | 25156 |      |   |
| 278.888633134999 | 110   | 150 | 0     | Open | ; |
| 33720            | 24233 |     | 25038 |      |   |
| 175.536912793196 | 110   | 150 | 0     | Open | ; |
| 33721            | 19943 |     | 19944 |      |   |
| 165.940049010126 | 110   | 150 | 0     | Open | ; |
| 33722            | 23277 |     | 20900 |      |   |
| 165.997444721143 | 300   | 140 | 0     | Open | ; |
| 33723            | 19803 |     | 20478 |      |   |
| 167.156951258384 | 200   | 150 | 0     | Open | ; |
| 33724            | 24561 |     | 24837 |      |   |
| 166.242269891862 | 110   | 150 | 0     | Open | ; |
| 33725            | 21462 |     | 24230 |      |   |
| 166.354922209799 | 100   | 140 | 0     | Open | ; |
| 33726            | 19723 |     | 19724 |      |   |
| 166.520549688834 | 160   | 150 | 0     | Open | ; |
| 33727            | 24393 |     | 21305 |      |   |
| 166.704361658634 | 75    | 140 | 0     | Open | ; |
| 33728            | 23197 |     | 23198 |      |   |
| 166.990508331161 | 110   | 150 | 0     | Open | ; |
| 33729            | 21917 |     | 21918 |      |   |
| 167.491761588433 | 140   | 150 | 0     | Open | ; |
| 33730            | 24856 |     | 24854 |      |   |
| 167.510467262073 | 75    | 140 | 0     | Open | ; |
| 33731            | 23505 |     | 22535 |      |   |
| 167.664533943936 | 226   | 150 | 0     | Open | ; |
| 33732            | 22834 |     | 23343 |      |   |
| 167.984578403917 | 110   | 150 | 0     | Open | ; |
| 33733            | 22150 |     | 21268 |      |   |



|                     |       |     |       |      |   |
|---------------------|-------|-----|-------|------|---|
| 167.990465019452    | 125   | 150 | 0     | Open | ; |
| 33734               | 21308 |     | 21309 |      |   |
| 168.218301306644    | 110   | 150 | 0     | Open | ; |
| 33735               | 20088 |     | 19545 |      |   |
| 168.97298402383 110 |       | 150 | 0     | Open | ; |
| 33736               | 21978 |     | 18727 |      |   |
| 169.031827082014    | 75    | 150 | 0     | Open | ; |
| 33737               | 22006 |     | 24072 |      |   |
| 169.158521055074    | 75    | 140 | 0     | Open | ; |
| 33738               | 21367 |     | 19057 |      |   |
| 170.298821281032    | 100   | 140 | 0     | Open | ; |
| 33739               | 19898 |     | 24343 |      |   |
| 174.586470186818    | 110   | 150 | 0     | Open | ; |
| 33740               | 19998 |     | 19999 |      |   |
| 170.582307624273    | 110   | 150 | 0     | Open | ; |
| 33741               | 24467 |     | 24462 |      |   |
| 192.354008789963    | 110   | 150 | 0     | Open | ; |
| 33742               | 20382 |     | 20434 |      |   |
| 170.669286696067    | 75    | 140 | 0     | Open | ; |
| 33743               | 24105 |     | 24259 |      |   |
| 171.309174708072    | 110   | 150 | 0     | Open | ; |
| 33744               | 24864 |     | 22687 |      |   |
| 171.540942105186    | 250   | 100 | 0     | Open | ; |
| 33745               | 24598 |     | 24600 |      |   |
| 171.687655676288    | 250   | 140 | 0     | Open | ; |
| 33746               | 21534 |     | 21535 |      |   |
| 171.963196621642    | 150   | 100 | 0     | Open | ; |
| 33747               | 24766 |     | 24777 |      |   |
| 203.22226433473 110 |       | 150 | 0     | Open | ; |
| 33748               | 19326 |     | 20454 |      |   |
| 172.425817280604    | 300   | 140 | 0     | Open | ; |
| 33749               | 23202 |     | 20501 |      |   |
| 172.61902021361 110 |       | 150 | 0     | Open | ; |
| 33750               | 24607 |     | 24670 |      |   |
| 238.580919791762    | 110   | 150 | 0     | Open | ; |
| 33751               | 24996 |     | 21041 |      |   |
| 173.844208643245    | 100   | 140 | 0     | Open | ; |
| 33752               | 24304 |     | 24227 |      |   |
| 175.538165650203    | 110   | 150 | 0     | Open | ; |
| 33753               | 24220 |     | 24661 |      |   |
| 173.793390579154    | 75    | 150 | 0     | Open | ; |
| 33754               | 21371 |     | 21372 |      |   |
| 175.697551380825    | 110   | 150 | 0     | Open | ; |
| 33755               | 18661 |     | 18662 |      |   |
| 176.323146817116    | 110   | 150 | 0     | Open | ; |
| 33756               | 23633 |     | 23634 |      |   |
| 176.631058431602    | 110   | 150 | 0     | Open | ; |
| 33757               | 22181 |     | 25044 |      |   |
| 177.003906066447    | 300   | 140 | 0     | Open | ; |
| 33758               | 21150 |     | 19055 |      |   |

|                     |       |     |       |      |   |
|---------------------|-------|-----|-------|------|---|
| 177.700101794404    | 110   | 150 | 0     | Open | ; |
| 33759               | 21143 |     | 21144 |      |   |
| 177.965118786931    | 125   | 150 | 0     | Open | ; |
| 33760               | 23230 |     | 18735 |      |   |
| 178.791142457676    | 110   | 150 | 0     | Open | ; |
| 33761               | 20763 |     | 19155 |      |   |
| 178.98983581491 100 |       | 140 | 0     | Open | ; |
| 33762               | 19737 |     | 19724 |      |   |
| 178.989899648498    | 160   | 150 | 0     | Open | ; |
| 33763               | 21409 |     | 21247 |      |   |
| 179.764022438828    | 110   | 150 | 0     | Open | ; |
| 33764               | 20898 |     | 23783 |      |   |
| 180.035299041146    | 250   | 140 | 0     | Open | ; |
| 33765               | 23419 |     | 19479 |      |   |
| 180.325318045194    | 110   | 150 | 0     | Open | ; |
| 33766               | 21279 |     | 20173 |      |   |
| 180.980337650767    | 200   | 140 | 0     | Open | ; |
| 33767               | 19247 |     | 19248 |      |   |
| 180.989560209071    | 110   | 150 | 0     | Open | ; |
| 33768               | 20013 |     | 20014 |      |   |
| 180.989714680181    | 450   | 100 | 0     | Open | ; |
| 33769               | 18800 |     | 18801 |      |   |
| 181.026632082209    | 140   | 150 | 0     | Open | ; |
| 33770               | 24303 |     | 24344 |      |   |
| 182.76603258491 110 |       | 150 | 0     | Open | ; |
| 33771               | 21662 |     | 21663 |      |   |
| 181.210412110328    | 250   | 140 | 0     | Open | ; |
| 33772               | 25059 |     | 22845 |      |   |
| 199.891012769512    | 250   | 150 | 0     | Open | ; |
| 33773               | 19636 |     | 24276 |      |   |
| 183.098384135659    | 75    | 150 | 0     | Open | ; |
| 33774               | 19059 |     | 19246 |      |   |
| 182.270819217054    | 110   | 150 | 0     | Open | ; |
| 33775               | 24192 |     | 24121 |      |   |
| 183.836502982652    | 110   | 150 | 0     | Open | ; |
| 33776               | 25139 |     | 23071 |      |   |
| 183.471473230764    | 75    | 150 | 0     | Open | ; |
| 33777               | 19535 |     | 23316 |      |   |
| 183.989575235231    | 110   | 150 | 0     | Open | ; |
| 33778               | 19974 |     | 19975 |      |   |
| 183.986667662415    | 110   | 150 | 0     | Open | ; |
| 33779               | 22832 |     | 22835 |      |   |
| 184.030529566598    | 110   | 150 | 0     | Open | ; |
| 33780               | 20485 |     | 19305 |      |   |
| 185.032918848346    | 125   | 150 | 0     | Open | ; |
| 33781               | 24297 |     | 23410 |      |   |
| 185.665951155074    | 100   | 140 | 0     | Open | ; |
| 33782               | 21869 |     | 19093 |      |   |
| 185.627086122845    | 75    | 150 | 0     | Open | ; |
| 33783               | 24055 |     | 20498 |      |   |

|                     |       |     |       |      |   |
|---------------------|-------|-----|-------|------|---|
| 185.967115170456    | 200   | 140 | 0     | Open | ; |
| 33784               | 18779 |     | 19964 |      |   |
| 186.325887750693    | 110   | 150 | 0     | Open | ; |
| 33785               | 19934 |     | 19935 |      |   |
| 186.32667096032 110 |       | 150 | 0     | Open | ; |
| 33786               | 23820 |     | 23821 |      |   |
| 186.754724931792    | 110   | 150 | 0     | Open | ; |
| 33787               | 24296 |     | 18967 |      |   |
| 189.032531227444    | 100   | 140 | 0     | Open | ; |
| 33788               | 23461 |     | 20188 |      |   |
| 187.694648871108    | 100   | 140 | 0     | Open | ; |
| 33789               | 19842 |     | 19549 |      |   |
| 187.989260578048    | 110   | 150 | 0     | Open | ; |
| 33790               | 19315 |     | 19316 |      |   |
| 188.632058999717    | 250   | 140 | 0     | Open | ; |
| 33791               | 24089 |     | 21652 |      |   |
| 189.635009726343    | 140   | 150 | 0     | Open | ; |
| 33792               | 22572 |     | 24382 |      |   |
| 189.11366427951 110 |       | 150 | 0     | Open | ; |
| 33793               | 20479 |     | 25063 |      |   |
| 189.806995518647    | 110   | 150 | 0     | Open | ; |
| 33794               | 21147 |     | 21148 |      |   |
| 189.823260266154    | 110   | 150 | 0     | Open | ; |
| 33795               | 23702 |     | 21631 |      |   |
| 189.989177779809    | 125   | 150 | 0     | Open | ; |
| 33796               | 23999 |     | 24000 |      |   |
| 191.014934839604    | 200   | 150 | 0     | Open | ; |
| 33797               | 18678 |     | 18679 |      |   |
| 190.989266049017    | 160   | 150 | 0     | Open | ; |
| 33798               | 23601 |     | 19878 |      |   |
| 191.722999409355    | 75    | 150 | 0     | Open | ; |
| 33799               | 24894 |     | 24896 |      |   |
| 194.091132221041    | 100   | 140 | 0     | Open | ; |
| 33800               | 18907 |     | 18908 |      |   |
| 192.469646226979    | 110   | 150 | 0     | Open | ; |
| 33801               | 21771 |     | 21772 |      |   |
| 193.99074700681 100 |       | 140 | 0     | Open | ; |
| 33802               | 24003 |     | 24096 |      |   |
| 194.474764147243    | 250   | 150 | 0     | Open | ; |
| 33803               | 24385 |     | 21909 |      |   |
| 194.84474431383 100 |       | 140 | 0     | Open | ; |
| 33804               | 24545 |     | 24531 |      |   |
| 194.973166671387    | 110   | 150 | 0     | Open | ; |
| 33805               | 23316 |     | 24124 |      |   |
| 194.934322876674    | 110   | 150 | 0     | Open | ; |
| 33806               | 22379 |     | 20526 |      |   |
| 194.98977671522 100 |       | 140 | 0     | Open | ; |
| 33807               | 19430 |     | 19922 |      |   |
| 195.031055503206    | 140   | 150 | 0     | Open | ; |
| 33808               | 24606 |     | 25161 |      |   |

|                     |       |     |       |      |   |
|---------------------|-------|-----|-------|------|---|
| 198.80862847537 110 |       | 150 | 0     | Open | ; |
| 33809               | 21012 |     | 22636 |      |   |
| 273.442541081313    | 160   | 150 | 0     | Open | ; |
| 33810               | 21475 |     | 19252 |      |   |
| 196.060906073717    | 160   | 150 | 0     | Open | ; |
| 33811               | 19767 |     | 21907 |      |   |
| 235.036788637592    | 140   | 150 | 0     | Open | ; |
| 33812               | 19233 |     | 20406 |      |   |
| 196.453188671219    | 110   | 150 | 0     | Open | ; |
| 33813               | 21145 |     | 21146 |      |   |
| 196.988717062565    | 110   | 150 | 0     | Open | ; |
| 33814               | 18543 |     | 24090 |      |   |
| 197.988068006176    | 110   | 150 | 0     | Open | ; |
| 33815               | 24794 |     | 24808 |      |   |
| 198.450013323175    | 160   | 150 | 0     | Open | ; |
| 33816               | 21144 |     | 20053 |      |   |
| 199.983848472645    | 125   | 150 | 0     | Open | ; |
| 33817               | 23126 |     | 20936 |      |   |
| 200.990427395957    | 110   | 150 | 0     | Open | ; |
| 33818               | 23227 |     | 24205 |      |   |
| 201.233976830093    | 100   | 140 | 0     | Open | ; |
| 33819               | 19544 |     | 22154 |      |   |
| 202.860353469263    | 160   | 150 | 0     | Open | ; |
| 33820               | 19277 |     | 19278 |      |   |
| 202.781763419781    | 110   | 150 | 0     | Open | ; |
| 33821               | 21407 |     | 21408 |      |   |
| 202.97189171307 110 |       | 150 | 0     | Open | ; |
| 33822               | 18643 |     | 18644 |      |   |
| 204.119873741821    | 250   | 140 | 0     | Open | ; |
| 33823               | 20920 |     | 21651 |      |   |
| 204.787897128564    | 110   | 150 | 0     | Open | ; |
| 33824               | 21658 |     | 21659 |      |   |
| 204.580562852496    | 250   | 140 | 0     | Open | ; |
| 33825               | 25026 |     | 24993 |      |   |
| 205.801919389338    | 100   | 140 | 0     | Open | ; |
| 33826               | 22811 |     | 24999 |      |   |
| 211.896295418363    | 160   | 150 | 0     | Open | ; |
| 33827               | 23384 |     | 20977 |      |   |
| 205.988401182874    | 110   | 150 | 0     | Open | ; |
| 33828               | 24760 |     | 21485 |      |   |
| 206.26489742875 200 |       | 150 | 0     | Open | ; |
| 33829               | 22037 |     | 22038 |      |   |
| 207.770675044951    | 110   | 150 | 0     | Open | ; |
| 33830               | 24962 |     | 24118 |      |   |
| 208.469878645262    | 75    | 140 | 0     | Open | ; |
| 33831               | 19518 |     | 19519 |      |   |
| 211.987876998553    | 75    | 140 | 0     | Open | ; |
| 33832               | 21609 |     | 20267 |      |   |
| 213.93657971894 150 |       | 140 | 0     | Open | ; |
| 33833               | 19369 |     | 21249 |      |   |

|                  |       |     |       |      |   |
|------------------|-------|-----|-------|------|---|
| 215.727779206149 | 110   | 150 | 0     | Open | ; |
| 33834            | 22833 |     | 22159 |      |   |
| 215.987543084435 | 110   | 150 | 0     | Open | ; |
| 33835            | 20324 |     | 20325 |      |   |
| 216.093013699046 | 125   | 150 | 0     | Open | ; |
| 33836            | 24894 |     | 25704 |      |   |
| 246.072208784428 | 75    | 140 | 0     | Open | ; |
| 33837            | 20261 |     | 24973 |      |   |
| 218.532237838264 | 75    | 140 | 0     | Open | ; |
| 33838            | 22099 |     | 20689 |      |   |
| 220.616179467063 | 110   | 150 | 0     | Open | ; |
| 33839            | 21049 |     | 22052 |      |   |
| 220.384415723436 | 110   | 150 | 0     | Open | ; |
| 33840            | 22189 |     | 22191 |      |   |
| 222.281507646645 | 400   | 130 | 0     | Open | ; |
| 33841            | 24902 |     | 24903 |      |   |
| 222.345949857607 | 110   | 150 | 0     | Open | ; |
| 33842            | 23113 |     | 22630 |      |   |
| 222.626704736105 | 110   | 150 | 0     | Open | ; |
| 33843            | 20962 |     | 20584 |      |   |
| 223.141840983933 | 140   | 150 | 0     | Open | ; |
| 33844            | 20854 |     | 22174 |      |   |
| 224.147796577374 | 200   | 140 | 0     | Open | ; |
| 33845            | 20496 |     | 18858 |      |   |
| 227.473921174474 | 150   | 140 | 0     | Open | ; |
| 33846            | 24546 |     | 24539 |      |   |
| 227.979184134236 | 160   | 150 | 0     | Open | ; |
| 33847            | 24544 |     | 24538 |      |   |
| 227.986867795055 | 110   | 150 | 0     | Open | ; |
| 33848            | 24389 |     | 23384 |      |   |
| 228.83214660486  | 110   | 150 | 0     | Open | ; |
| 33849            | 21986 |     | 21627 |      |   |
| 238.76449422226  | 110   | 150 | 0     | Open | ; |
| 33851            | 24328 |     | 19006 |      |   |
| 296.53428110602  | 110   | 150 | 0     | Open | ; |
| 33852            | 19159 |     | 22166 |      |   |
| 232.986725444674 | 125   | 150 | 0     | Open | ; |
| 33853            | 19867 |     | 25696 |      |   |
| 244.140649533812 | 160   | 150 | 0     | Open | ; |
| 33854            | 18788 |     | 18789 |      |   |
| 233.517409443059 | 200   | 150 | 0     | Open | ; |
| 33856            | 24134 |     | 24994 |      |   |
| 234.778014807312 | 250   | 140 | 0     | Open | ; |
| 33857            | 18714 |     | 24942 |      |   |
| 236.267807966558 | 100   | 140 | 0     | Open | ; |
| 33859            | 21542 |     | 21543 |      |   |
| 239.438802002494 | 110   | 150 | 0     | Open | ; |
| 33860            | 23096 |     | 21092 |      |   |
| 242.140311626344 | 140   | 150 | 0     | Open | ; |
| 33861            | 25045 |     | 25015 |      |   |

|                     |       |     |       |      |   |
|---------------------|-------|-----|-------|------|---|
| 239.542471982247    | 110   | 150 | 0     | Open | ; |
| 33862               | 19661 |     | 20444 |      |   |
| 241.990165691389    | 100   | 140 | 0     | Open | ; |
| 33863               | 19961 |     | 19962 |      |   |
| 242.686021603122    | 110   | 150 | 0     | Open | ; |
| 33864               | 24335 |     | 20969 |      |   |
| 251.96884440105 315 |       | 150 | 0     | Open | ; |
| 33866               | 22444 |     | 25009 |      |   |
| 314.428020003971    | 100   | 130 | 0     | Open | ; |
| 33867               | 21909 |     | 21910 |      |   |
| 245.862230301279    | 100   | 140 | 0     | Open | ; |
| 33868               | 22534 |     | 23126 |      |   |
| 246.896569393806    | 110   | 150 | 0     | Open | ; |
| 33869               | 20549 |     | 22128 |      |   |
| 249.11298235375 110 |       | 150 | 0     | Open | ; |
| 33870               | 22467 |     | 24997 |      |   |
| 248.26154736108 110 |       | 150 | 0     | Open | ; |
| 33871               | 21391 |     | 18494 |      |   |
| 248.374623776693    | 110   | 150 | 0     | Open | ; |
| 33872               | 22790 |     | 24188 |      |   |
| 248.847155737302    | 150   | 100 | 0     | Open | ; |
| 33873               | 20225 |     | 20226 |      |   |
| 249.333795174464    | 100   | 140 | 0     | Open | ; |
| 33874               | 24383 |     | 24948 |      |   |
| 249.719268223969    | 200   | 140 | 0     | Open | ; |
| 33875               | 25022 |     | 22124 |      |   |
| 287.57481782087 110 |       | 150 | 0     | Open | ; |
| 33876               | 18492 |     | 21173 |      |   |
| 250.46559063153 110 |       | 150 | 0     | Open | ; |
| 33877               | 21818 |     | 21819 |      |   |
| 250.497194780438    | 250   | 140 | 0     | Open | ; |
| 33878               | 18688 |     | 18689 |      |   |
| 250.985759734823    | 150   | 140 | 0     | Open | ; |
| 33879               | 19275 |     | 19276 |      |   |
| 252.146981238868    | 110   | 150 | 0     | Open | ; |
| 33880               | 22003 |     | 24949 |      |   |
| 252.83937568174 75  |       | 140 | 0     | Open | ; |
| 33881               | 19361 |     | 19362 |      |   |
| 254.075460923629    | 110   | 150 | 0     | Open | ; |
| 33882               | 24138 |     | 21023 |      |   |
| 254.585302573558    | 110   | 150 | 0     | Open | ; |
| 33883               | 25154 |     | 25035 |      |   |
| 258.871083410103    | 75    | 140 | 0     | Open | ; |
| 33884               | 18996 |     | 20196 |      |   |
| 324.287193273773    | 75    | 100 | 0     | Open | ; |
| 33886               | 22522 |     | 23824 |      |   |
| 263.986802783611    | 250   | 140 | 0     | Open | ; |
| 33887               | 24251 |     | 24971 |      |   |
| 267.524863920213    | 250   | 140 | 0     | Open | ; |
| 33888               | 21818 |     | 20922 |      |   |

|                  |       |     |       |      |   |
|------------------|-------|-----|-------|------|---|
| 267.61529774587  | 250   | 100 | 0     | Open | ; |
| 33889            | 18667 |     | 18643 |      |   |
| 268.108743668211 | 250   | 140 | 0     | Open | ; |
| 33890            | 22574 |     | 20060 |      |   |
| 268.155803682943 | 75    | 150 | 0     | Open | ; |
| 33891            | 25038 |     | 20799 |      |   |
| 279.717896589837 | 110   | 150 | 0     | Open | ; |
| 33892            | 23842 |     | 20661 |      |   |
| 271.357559064559 | 150   | 140 | 0     | Open | ; |
| 33893            | 20992 |     | 19654 |      |   |
| 272.088410478899 | 75    | 100 | 0     | Open | ; |
| 33894            | 23438 |     | 23439 |      |   |
| 272.219980832533 | 110   | 150 | 0     | Open | ; |
| 33895            | 18466 |     | 21364 |      |   |
| 274.346126628671 | 75    | 140 | 0     | Open | ; |
| 33896            | 19893 |     | 24536 |      |   |
| 275.685089992405 | 75    | 150 | 0     | Open | ; |
| 33897            | 24057 |     | 24918 |      |   |
| 283.047104716596 | 125   | 140 | 0     | Open | ; |
| 33898            | 21590 |     | 25007 |      |   |
| 277.27782857672  | 110   | 150 | 0     | Open | ; |
| 33899            | 24991 |     | 23569 |      |   |
| 277.707461272755 | 110   | 150 | 0     | Open | ; |
| 33900            | 18782 |     | 25158 |      |   |
| 278.555451699437 | 160   | 150 | 0     | Open | ; |
| 33901            | 23642 |     | 24963 |      |   |
| 283.451252794069 | 100   | 140 | 0     | Open | ; |
| 33902            | 23636 |     | 20984 |      |   |
| 285.646795990076 | 350   | 140 | 0     | Open | ; |
| 33903            | 23944 |     | 23945 |      |   |
| 284.450739708292 | 200   | 150 | 0     | Open | ; |
| 33904            | 21285 |     | 24849 |      |   |
| 277.009420033362 | 500   | 120 | 0     | Open | ; |
| 33905            | 24647 |     | 24597 |      |   |
| 287.455498862822 | 110   | 150 | 0     | Open | ; |
| 33906            | 21882 |     | 21883 |      |   |
| 287.531513204842 | 110   | 150 | 0     | Open | ; |
| 33907            | 24954 |     | 20835 |      |   |
| 289.494989228224 | 200   | 150 | 0     | Open | ; |
| 33908            | 25010 |     | 25011 |      |   |
| 289.874428402649 | 250   | 100 | 0     | Open | ; |
| 33909            | 22052 |     | 19457 |      |   |
| 326.075244318841 | 110   | 150 | 0     | Open | ; |
| 33910            | 24542 |     | 24548 |      |   |
| 290.473054122288 | 75    | 150 | 0     | Open | ; |
| 33911            | 20255 |     | 19383 |      |   |
| 340.198427856151 | 250   | 140 | 0     | Open | ; |
| 33912            | 24908 |     | 24909 |      |   |
| 299.363873394464 | 350   | 140 | 0     | Open | ; |
| 33913            | 20890 |     | 20891 |      |   |

|                     |       |     |       |  |      |   |
|---------------------|-------|-----|-------|--|------|---|
| 300.188113250065    | 110   | 150 | 0     |  | Open | ; |
| 33914               | 19569 |     | 22291 |  |      |   |
| 300.94382031941 75  |       | 140 | 0     |  | Open | ; |
| 33915               | 18592 |     | 22521 |  |      |   |
| 300.928283191795    | 110   | 150 | 0     |  | Open | ; |
| 33916               | 24331 |     | 24943 |  |      |   |
| 303.215142224082    | 200   | 150 | 0     |  | Open | ; |
| 33917               | 24760 |     | 19854 |  |      |   |
| 331.592352040641    | 200   | 150 | 0     |  | Open | ; |
| 33919               | 24529 |     | 24547 |  |      |   |
| 320.166934378198    | 110   | 150 | 0     |  | Open | ; |
| 33920               | 21871 |     | 22028 |  |      |   |
| 328.434730388882    | 110   | 150 | 0     |  | Open | ; |
| 33921               | 25015 |     | 25016 |  |      |   |
| 341.371765806388    | 110   | 150 | 0     |  | Open | ; |
| 33922               | 24543 |     | 24535 |  |      |   |
| 329.263954904264    | 110   | 150 | 0     |  | Open | ; |
| 33923               | 20980 |     | 18531 |  |      |   |
| 343.44942637577 200 |       | 140 | 0     |  | Open | ; |
| 33924               | 23924 |     | 24498 |  |      |   |
| 459.32493172125 350 |       | 140 | 0     |  | Open | ; |
| 33925               | 22736 |     | 22176 |  |      |   |
| 373.817692909307    | 500   | 140 | 0     |  | Open | ; |
| 33926               | 24638 |     | 24148 |  |      |   |
| 355.099529868328    | 110   | 150 | 0     |  | Open | ; |
| 33927               | 23807 |     | 23818 |  |      |   |
| 358.17999689804 125 |       | 100 | 0     |  | Open | ; |
| 33928               | 23990 |     | 22464 |  |      |   |
| 367.546204059871    | 110   | 150 | 0     |  | Open | ; |
| 33929               | 19976 |     | 19977 |  |      |   |
| 368.482938951983    | 110   | 150 | 0     |  | Open | ; |
| 33930               | 18730 |     | 25143 |  |      |   |
| 436.862109407993    | 200   | 150 | 0     |  | Open | ; |
| 33931               | 21567 |     | 21568 |  |      |   |
| 373.855286021246    | 110   | 150 | 0     |  | Open | ; |
| 33932               | 24269 |     | 18832 |  |      |   |
| 453.599810060483    | 200   | 150 | 0     |  | Open | ; |
| 33933               | 21641 |     | 22481 |  |      |   |
| 376.93233638892 150 |       | 140 | 0     |  | Open | ; |
| 33934               | 18540 |     | 23727 |  |      |   |
| 377.099370340469    | 110   | 150 | 0     |  | Open | ; |
| 33935               | 24526 |     | 24540 |  |      |   |
| 379.607781731827    | 110   | 150 | 0     |  | Open | ; |
| 33936               | 18880 |     | 18881 |  |      |   |
| 380.799073064739    | 110   | 150 | 0     |  | Open | ; |
| 33937               | 20692 |     | 22794 |  |      |   |
| 383.847148279496    | 226   | 150 | 0     |  | Open | ; |
| 33938               | 21876 |     | 21877 |  |      |   |
| 382.978083867077    | 110   | 150 | 0     |  | Open | ; |
| 33939               | 24055 |     | 25031 |  |      |   |



|                     |         |     |         |      |   |
|---------------------|---------|-----|---------|------|---|
| 383.229489132666    | 200     | 140 | 0       | Open | ; |
| 33940               | 19385   |     | 19386   |      |   |
| 383.69617169279 450 |         | 140 | 0       | Open | ; |
| 33941               | 24954   |     | 24964   |      |   |
| 404.048755713243    | 200     | 150 | 0       | Open | ; |
| 33942               | 24537   |     | 24541   |      |   |
| 397.452176845974    | 110     | 150 | 0       | Open | ; |
| 33943               | 18918   |     | 24211   |      |   |
| 403.976895755623    | 300     | 140 | 0       | Open | ; |
| 33944               | 24999   |     | 24981   |      |   |
| 438.356854145968    | 110     | 150 | 0       | Open | ; |
| 33945               | 22073   |     | 23145   |      |   |
| 443.892802851018    | 110     | 150 | 0       | Open | ; |
| 33947               | 22483   |     | 20486   |      |   |
| 454.359830042681    | 400     | 130 | 0       | Open | ; |
| 33948               | 25066   |     | 24341   |      |   |
| 464.815633062506    | 200     | 150 | 0       | Open | ; |
| 33949               | 22780   |     | 24603   |      |   |
| 470.545973021535    | 200     | 140 | 0       | Open | ; |
| 33950               | 19383   |     | 19384   |      |   |
| 476.939670749732    | 250     | 140 | 0       | Open | ; |
| 33951               | 20821   |     | 19385   |      |   |
| 525.308232336486    | 450     | 140 | 0       | Open | ; |
| 33952               | 24061   |     | 23471   |      |   |
| 508.971042262998    | 110     | 150 | 0       | Open | ; |
| 33953               | 22643   |     | 25058   |      |   |
| 513.018571444341    | 500     | 150 | 0       | Open | ; |
| 33954               | 24808   |     | 24811   |      |   |
| 543.235762790214    | 160     | 150 | 0       | Open | ; |
| 33955               | 22000   |     | 18550   |      |   |
| 598.317315130117    | 300     | 140 | 0       | Open | ; |
| 33956               | 24909   |     | 25059   |      |   |
| 622.380222233263    | 220     | 150 | 0       | Open | ; |
| 33958               | 24900   |     | 25143   |      |   |
| 1225.3963568828 200 |         | 150 | 0       | Open | ; |
| 33959               | 25071   |     | 24270   |      |   |
| 759.807551787038    | 100     | 140 | 0       | Open | ; |
| 33960               | 20488   |     | 20829   |      |   |
| 690.043562527403    | 350     | 140 | 0       | Open | ; |
| 33961               | 21647   |     | 24587   |      |   |
| 694.999875714029    | 100     | 140 | 0       | Open | ; |
| 33962               | 24943   |     | 24271   |      |   |
| 784.356549374155    | 200     | 150 | 0       | Open | ; |
| 33963               | 22537   |     | 25064   |      |   |
| 1032.42868271496    | 500     | 150 | 0       | Open | ; |
| 33966               | 24893   |     | 24894   |      |   |
| 2243.22993161513    | 100     | 140 | 0       | Open | ; |
| 35479               | 24852   |     | 35478-B |      |   |
| 8.68123374780848    | 500     | 130 | 0       | Open | ; |
| 35480               | 35478-B |     | 23827   |      |   |

|                  |         |     |         |      |   |
|------------------|---------|-----|---------|------|---|
| 12.4756296493337 | 500     | 130 | 0       | Open | ; |
| 35482            | 24849   |     | 35481-B |      |   |
| 16.8566508198914 | 500     | 130 | 0       | Open | ; |
| 35483            | 35481-B |     | 24850   |      |   |
| 7.2599050025147  | 500     | 130 | 0       | Open | ; |
| 35488            | 25048   |     | 35487-B |      |   |
| 17.6030262170885 | 350     | 140 | 0       | Open | ; |
| 35489            | 35487-B |     | 25057   |      |   |
| 14.403378279693  | 350     | 140 | 0       | Open | ; |
| 35491            | 22730   |     | 35490-B |      |   |
| 19.9940141302742 | 350     | 140 | 0       | Open | ; |
| 35492            | 35490-B |     | 25057   |      |   |
| 19.8518234256448 | 350     | 140 | 0       | Open | ; |
| 35497            | 21646   |     | 35496-B |      |   |
| 69.0269076892284 | 200     | 140 | 0       | Open | ; |
| 35498            | 35496-B |     | 23568   |      |   |
| 38.1644944671133 | 200     | 50  | 0       | Open | ; |
| 35583            | 24669   |     | 35582   |      |   |
| 18.0882378026706 | 110     | 150 | 0       | Open | ; |
| 35585            | 35582   |     | 35584   |      |   |
| 31.0888728447011 | 110     | 150 | 0       | Open | ; |
| 35587            | 35584   |     | 35586   |      |   |
| 45.9813427961929 | 110     | 150 | 0       | Open | ; |
| 35589            | 35586   |     | 35588   |      |   |
| 30.9657969232528 | 110     | 150 | 0       | Open | ; |
| 35590            | 35588   |     | 24669   |      |   |
| 29.1842921966117 | 110     | 150 | 0       | Open | ; |
| 35592            | 24667   |     | 35591   |      |   |
| 18.103720913714  | 110     | 150 | 0       | Open | ; |
| 35594            | 35591   |     | 35593   |      |   |
| 33.1397053279091 | 110     | 150 | 0       | Open | ; |
| 35596            | 35593   |     | 35595   |      |   |
| 46.3957822954951 | 110     | 150 | 0       | Open | ; |
| 35598            | 35595   |     | 35597   |      |   |
| 30.9111879712549 | 110     | 150 | 0       | Open | ; |
| 35599            | 35597   |     | 24667   |      |   |
| 28.5105548074562 | 110     | 150 | 0       | Open | ; |
| 35603            | 24937   |     | 35602   |      |   |
| 13.4359773214587 | 110     | 150 | 0       | Open | ; |
| 35605            | 35602   |     | 35604   |      |   |
| 108.606944172235 | 110     | 150 | 0       | Open | ; |
| 35607            | 35604   |     | 35606   |      |   |
| 56.4521663211925 | 110     | 150 | 0       | Open | ; |
| 35609            | 35606   |     | 35608   |      |   |
| 107.66222253923  | 110     | 150 | 0       | Open | ; |
| 35611            | 35608   |     | 35610   |      |   |
| 56.6169667373088 | 110     | 150 | 0       | Open | ; |
| 35613            | 35610   |     | 35612   |      |   |
| 55.2941845912662 | 110     | 150 | 0       | Open | ; |
| 35615            | 35612   |     | 35614   |      |   |

|                  |       |     |       |      |   |
|------------------|-------|-----|-------|------|---|
| 107.538483022644 | 110   | 150 | 0     | Open | ; |
| 35617            | 35614 |     | 35616 |      |   |
| 55.7471020663547 | 110   | 150 | 0     | Open | ; |
| 35618            | 35616 |     | 35606 |      |   |
| 56.4527616212752 | 110   | 150 | 0     | Open | ; |
| 35619            | 35616 |     | 35610 |      |   |
| 107.45616524821  | 110   | 150 | 0     | Open | ; |
| 35621            | 35614 |     | 35620 |      |   |
| 7.05541143252342 | 110   | 150 | 0     | Open | ; |
| 35623            | 35620 |     | 35622 |      |   |
| 15.2444809183918 | 110   | 150 | 0     | Open | ; |
| 35625            | 35622 |     | 35624 |      |   |
| 90.1754825939467 | 110   | 150 | 0     | Open | ; |
| 35630            | 21165 |     | 35629 |      |   |
| 63.1989512041952 | 100   | 140 | 0     | Open | ; |
| 35631            | 35629 |     | 21166 |      |   |
| 61.4550318294826 | 100   | 140 | 0     | Open | ; |
| 35632            | 19808 |     | 35628 |      |   |
| 10.0289124763009 | 75    | 140 | 0     | Open | ; |
| 35633            | 35628 |     | 19191 |      |   |
| 46.0621704370357 | 75    | 140 | 0     | Open | ; |
| 35634            | 35629 |     | 35628 |      |   |
| 51.1106381610772 | 150   | 140 | 0     | Open | ; |
| 35635            | 21166 |     | 25157 |      |   |
| 68.9766383620042 | 100   | 140 | 0     | Open | ; |
| 35636            | 25157 |     | 24461 |      |   |
| 61.8587265338742 | 100   | 140 | 0     | Open | ; |
| 35638            | 19159 |     | 35637 |      |   |
| 1.35585609731341 | 125   | 150 | 0     | Open | ; |
| 35639            | 35637 |     | 18760 |      |   |
| 11.6443742383883 | 125   | 150 | 0     | Open | ; |
| 35656            | 35637 |     | 35655 |      |   |
| 14.5239870195785 | 110   | 150 | 0     | Open | ; |
| 35658            | 35655 |     | 35657 |      |   |
| 3.77041280956176 | 110   | 150 | 0     | Open | ; |
| 35663            | 35661 |     | 35662 |      |   |
| 34.7803571222256 | 110   | 150 | 0     | Open | ; |
| 35665            | 35662 |     | 35664 |      |   |
| 89.6738627567039 | 110   | 150 | 0     | Open | ; |
| 35667            | 35664 |     | 35666 |      |   |
| 42.1732799515245 | 110   | 150 | 0     | Open | ; |
| 35669            | 35662 |     | 35668 |      |   |
| 102.211866163958 | 110   | 150 | 0     | Open | ; |
| 35670            | 35668 |     | 35664 |      |   |
| 130.420185696147 | 110   | 150 | 0     | Open | ; |
| 35672            | 35668 |     | 35671 |      |   |
| 39.6556086165391 | 110   | 150 | 0     | Open | ; |
| 35674            | 35671 |     | 35673 |      |   |
| 16.4133184727074 | 110   | 150 | 0     | Open | ; |
| 35675            | 35671 |     | 35655 |      |   |

|                  |       |     |       |      |   |
|------------------|-------|-----|-------|------|---|
| 96.1380759776608 | 110   | 150 | 0     | Open | ; |
| 35677            | 22897 |     | 35676 |      |   |
| 24.1871726235625 | 200   | 150 | 0     | Open | ; |
| 35679            | 35676 |     | 35678 |      |   |
| 37.0229862561784 | 110   | 150 | 0     | Open | ; |
| 35681            | 35678 |     | 35680 |      |   |
| 34.7945273255911 | 110   | 150 | 0     | Open | ; |
| 35683            | 35680 |     | 35682 |      |   |
| 35.0341561824764 | 110   | 150 | 0     | Open | ; |
| 35685            | 35682 |     | 35684 |      |   |
| 28.9830992618003 | 110   | 150 | 0     | Open | ; |
| 35687            | 35684 |     | 35686 |      |   |
| 36.4319811568313 | 110   | 150 | 0     | Open | ; |
| 35689            | 35686 |     | 35688 |      |   |
| 38.7058483056183 | 110   | 150 | 0     | Open | ; |
| 35691            | 35688 |     | 35690 |      |   |
| 116.068564772182 | 110   | 150 | 0     | Open | ; |
| 35693            | 35690 |     | 35692 |      |   |
| 15.7129441488827 | 110   | 150 | 0     | Open | ; |
| 35695            | 35690 |     | 35694 |      |   |
| 39.3518479988914 | 110   | 150 | 0     | Open | ; |
| 35697            | 35694 |     | 35696 |      |   |
| 36.2242293147407 | 110   | 150 | 0     | Open | ; |
| 35699            | 35696 |     | 35698 |      |   |
| 29.2750253859981 | 110   | 150 | 0     | Open | ; |
| 35701            | 35698 |     | 35700 |      |   |
| 35.1768200103264 | 110   | 150 | 0     | Open | ; |
| 35703            | 35700 |     | 35702 |      |   |
| 34.8763236202596 | 110   | 150 | 0     | Open | ; |
| 35705            | 35702 |     | 35704 |      |   |
| 36.3063806273837 | 110   | 150 | 0     | Open | ; |
| 35706            | 35704 |     | 35676 |      |   |
| 112.453118896475 | 200   | 150 | 0     | Open | ; |
| 35707            | 35678 |     | 35702 |      |   |
| 112.370738800929 | 110   | 150 | 0     | Open | ; |
| 35708            | 35700 |     | 35680 |      |   |
| 112.607977722155 | 110   | 150 | 0     | Open | ; |
| 35709            | 35682 |     | 35698 |      |   |
| 113.832565972543 | 110   | 150 | 0     | Open | ; |
| 35710            | 35696 |     | 35684 |      |   |
| 114.254604105401 | 110   | 150 | 0     | Open | ; |
| 35711            | 35686 |     | 35694 |      |   |
| 115.878758959392 | 110   | 150 | 0     | Open | ; |
| 35713            | 35676 |     | 35712 |      |   |
| 42.6356874255695 | 110   | 150 | 0     | Open | ; |
| 35715            | 35712 |     | 35714 |      |   |
| 40.2727735169941 | 110   | 150 | 0     | Open | ; |
| 35717            | 35714 |     | 35716 |      |   |
| 108.799884899908 | 110   | 150 | 0     | Open | ; |
| 35719            | 35716 |     | 35718 |      |   |

|                  |       |     |       |      |   |
|------------------|-------|-----|-------|------|---|
| 49.3798253005934 | 110   | 150 | 0     | Open | ; |
| 35720            | 35718 |     | 35704 |      |   |
| 42.7713578202238 | 110   | 150 | 0     | Open | ; |
| 35722            | 35704 |     | 35721 |      |   |
| 14.3231791512255 | 200   | 150 | 0     | Open | ; |
| 35723            | 35718 |     | 35712 |      |   |
| 107.906470674059 | 110   | 150 | 0     | Open | ; |
| 35725            | 20660 |     | 35724 |      |   |
| 84.7644957147597 | 110   | 150 | 0     | Open | ; |
| 35727            | 35724 |     | 35726 |      |   |
| 55.2116114872165 | 110   | 150 | 0     | Open | ; |
| 35729            | 35726 |     | 35728 |      |   |
| 72.0644726802382 | 110   | 150 | 0     | Open | ; |
| 35731            | 35726 |     | 35730 |      |   |
| 35.9766868363156 | 110   | 150 | 0     | Open | ; |
| 35733            | 35724 |     | 35732 |      |   |
| 178.567205807782 | 110   | 150 | 0     | Open | ; |
| 35735            | 23596 |     | 35734 |      |   |
| 39.8500645542315 | 110   | 150 | 0     | Open | ; |
| 35738            | 35734 |     | 35737 |      |   |
| 39.166799551367  | 110   | 150 | 0     | Open | ; |
| 35740            | 35737 |     | 25036 |      |   |
| 34.4120398238484 | 110   | 150 | 0     | Open | ; |
| 35741            | 35734 |     | 21927 |      |   |
| 127.002027855408 | 110   | 150 | 0     | Open | ; |
| 35742            | 20711 |     | 25037 |      |   |
| 128.992777523383 | 160   | 150 | 0     | Open | ; |
| 35743            | 25037 |     | 25036 |      |   |
| 6.70142536003866 | 160   | 150 | 0     | Open | ; |
| 35744            | 21926 |     | 35737 |      |   |
| 126.992268957528 | 110   | 150 | 0     | Open | ; |
| 35746            | 22259 |     | 35745 |      |   |
| 32.3565535408009 | 110   | 150 | 0     | Open | ; |
| 35749            | 35745 |     | 35748 |      |   |
| 40.5410077848743 | 75    | 150 | 0     | Open | ; |
| 35751            | 35745 |     | 35750 |      |   |
| 33.7886372706048 | 110   | 150 | 0     | Open | ; |
| 35752            | 35750 |     | 22382 |      |   |
| 61.1080295559699 | 110   | 150 | 0     | Open | ; |
| 35754            | 35750 |     | 35753 |      |   |
| 26.0037557374021 | 75    | 150 | 0     | Open | ; |
| 35756            | 21549 |     | 35755 |      |   |
| 49.1701732623624 | 100   | 140 | 0     | Open | ; |
| 35758            | 24951 |     | 35757 |      |   |
| 4.41544112277602 | 125   | 150 | 0     | Open | ; |
| 35759            | 35757 |     | 24375 |      |   |
| 235.956369526758 | 125   | 150 | 0     | Open | ; |
| 35760            | 35755 |     | 35757 |      |   |
| 12.4426798022809 | 100   | 140 | 0     | Open | ; |
| 35765            | 21279 |     | 23356 |      |   |

|                  |       |     |       |      |   |
|------------------|-------|-----|-------|------|---|
| 18.8437686114554 | 50    | 140 | 0     | Open | ; |
| 35768            | 25050 |     | 24157 |      |   |
| 27.9990654425185 | 50    | 140 | 0     | Open | ; |
| 35772            | 20456 |     | 20980 |      |   |
| 165.733903681901 | 200   | 140 | 0     | Open | ; |
| 35775            | 24127 |     | 22172 |      |   |
| 34.3563269750303 | 200   | 140 | 0     | Open | ; |
| 35781            | 20662 |     | 35780 |      |   |
| 17.3050833453824 | 150   | 140 | 0     | Open | ; |
| 35813            | 20489 |     | 20487 |      |   |
| 15.0723595816931 | 397   | 150 | 0     | Open | ; |
| 35850            | 22531 |     | 35849 |      |   |
| 47.1160577920133 | 158.6 | 150 | 0     | Open | ; |
| 35853            | 20120 |     | 35852 |      |   |
| 46.2047535305286 | 159   | 150 | 0     | Open | ; |
| 35855            | 35852 |     | 35854 |      |   |
| 50.7226162442358 | 159   | 150 | 0     | Open | ; |
| 35859            | 18559 |     | 35858 |      |   |
| 100.346429138799 | 159   | 150 | 0     | Open | ; |
| 35861            | 22258 |     | 35860 |      |   |
| 125.030851096935 | 159   | 150 | 0     | Open | ; |
| 35865            | 35688 |     | 35864 |      |   |
| 71.0331354227276 | 159   | 150 | 0     | Open | ; |
| 35869            | 35661 |     | 35868 |      |   |
| 22.8562027491068 | 159   | 150 | 0     | Open | ; |
| 35872            | 24811 |     | 35871 |      |   |
| 46.707347687056  | 159   | 150 | 0     | Open | ; |
| 35875            | 24038 |     | 35874 |      |   |
| 48.0818347726073 | 159   | 150 | 0     | Open | ; |
| 35878            | 25015 |     | 35877 |      |   |
| 69.9200030949894 | 159   | 150 | 0     | Open | ; |
| 35881            | 22005 |     | 35880 |      |   |
| 68.5616880662331 | 159   | 150 | 0     | Open | ; |
| 35884            | 23169 |     | 35883 |      |   |
| 88.229083757535  | 159   | 150 | 0     | Open | ; |
| 35938            | 22760 |     | 35937 |      |   |
| 577.936572750587 | 65    | 140 | 0     | Open | ; |
| 35939            | 35937 |     | 24893 |      |   |
| 611.953410711984 | 65    | 140 | 0     | Open | ; |
| 35960            | 22023 |     | 21970 |      |   |
| 12.5801455287851 | 176.2 | 150 | 0     | Open | ; |
| 35988            | 23045 |     | 35987 |      |   |
| 64.7423069332859 | 158.6 | 150 | 0     | Open | ; |
| 36751            | 21732 |     | 21787 |      |   |
| 53.9089762631248 | 75    | 140 | 0     | Open | ; |
| 36753            | 21730 |     | 22292 |      |   |
| 54.8836341238295 | 75    | 140 | 0     | Open | ; |
| 36756            | 21786 |     | 36755 |      |   |
| 35.6925251577652 | 75    | 140 | 0     | Open | ; |
| 36760            | 36758 |     | 22293 |      |   |

|                  |                 |     |       |      |   |
|------------------|-----------------|-----|-------|------|---|
| 33.8631450653517 | 75              | 140 | 0     | Open | ; |
| 36761            | 36755           |     | 21787 |      |   |
| 6.87479727919774 | 96.8            | 150 | 0     | Open | ; |
| 36762            | 36758           |     | 22292 |      |   |
| 8.25056700536773 | 96.8            | 150 | 0     | Open | ; |
| 36765            | 24811           |     | 36764 |      |   |
| 560.837072661871 | 250             | 150 | 0     | Open | ; |
| 36766            | 36764           |     | 25064 |      |   |
| 974.706217068144 | 250             | 150 | 0     | Open | ; |
| 36767            | 25028           |     | 36764 |      |   |
| 122.551245162008 | 99              | 130 | 0     | Open | ; |
| 36772            | 24127           |     | 25012 |      |   |
| 147.996281803354 | 200             | 140 | 0     | Open | ; |
| 36774            | 23627           |     | 36773 |      |   |
| 81.6120281210969 | 152.40000000061 | 130 | 0     | Open | ; |
| 36776            | 20969           |     | 36775 |      |   |
| 244.831408289417 | 315             | 140 | 0     | Open | ; |
| 36777            | 36775           |     | 20970 |      |   |
| 224.734020188299 | 315             | 140 | 0     | Open | ; |
| 36779            | 25045           |     | 36778 |      |   |
| 103.284619804612 | 200             | 150 | 0     | Open | ; |
| 36781            | 36775           |     | 36778 |      |   |
| 31.4070552723175 | 200             | 130 | 0     | Open | ; |
| 36783            | 23312           |     | 36782 |      |   |
| 40.912852446448  | 152.40000000061 | 130 | 0     | Open | ; |
| 36785            | 36782           |     | 36784 |      |   |
| 19.7888859411767 | 152.40000000061 | 130 | 0     | Open | ; |
| 36786            | 19385           |     | 20516 |      |   |
| 82.8777380962    | 440             | 150 | 0     | Open | ; |
| 36787            | 20516           |     | 19718 |      |   |
| 285.580846035319 | 440             | 150 | 0     | Open | ; |
| 36795            | 19771           |     | 19718 |      |   |
| 407.318797734581 | 396             | 150 | 0     | Open | ; |
| 36796            | 19771           |     | 20273 |      |   |
| 43.2447810380018 | 396             | 150 | 0     | Open | ; |
| 36797            | 20266           |     | 20273 |      |   |
| 336.95659680219  | 396             | 150 | 0     | Open | ; |
| 36798            | 22172           |     | 20266 |      |   |
| 425.102806261345 | 396             | 150 | 0     | Open | ; |
| 36799            | 22172           |     | 20498 |      |   |
| 24.022161903312  | 313             | 150 | 0     | Open | ; |
| 36800            | 22172           |     | 20508 |      |   |
| 284.960631052727 | 277             | 150 | 0     | Open | ; |
| 36802            | 20829           |     | 36801 |      |   |
| 255.193738869873 | 350             | 140 | 0     | Open | ; |
| 36806            | 36804           |     | 25157 |      |   |
| 77.3907080080737 | 100             | 140 | 0     | Open | ; |
| 36809            | 36807           |     | 23668 |      |   |
| 293.665661884513 | 110             | 150 | 0     | Open | ; |
| 36812            | 19261           |     | 36811 |      |   |

|                  |       |     |       |        |     |
|------------------|-------|-----|-------|--------|-----|
| 223.280799679515 | 450   | 100 | 0     | Open   | ;   |
| 36816            | 36814 |     | 20593 |        |     |
| 5.76690385203432 | 110   | 150 | 0     | Open   | ;   |
| 36818            | 20723 |     | 36817 |        |     |
| 12.9340481570564 | 110   | 150 | 0     | Open   | ;   |
| 36821            | 22888 |     | 36820 |        |     |
| 17.4662389412647 | 110   | 150 | 0     | Open   | ;   |
| 36825            | 36823 |     | 20283 |        |     |
| 12.2528509391026 | 110   | 150 | 0     | Open   | ;   |
| 36827            | 22880 |     | 36826 |        |     |
| 11.1842580111574 | 110   | 150 | 0     | Open   | ;   |
| 36830            | 21580 |     | 36829 |        |     |
| 14.3387605389837 | 110   | 150 | 0     | Open   | ;   |
| 36834            | 36832 |     | 22879 |        |     |
| 10.058559209747  | 110   | 150 | 0     | Open   | ;   |
| 36836            | 24064 |     | 36835 |        |     |
| 16.7027129254141 | 500   | 130 | 0     | Open   | ;   |
| 36840            | 36838 |     | 22561 |        |     |
| 15.1771109159603 | 200   | 150 | 0     | Open   | ;   |
| 36842            | 25042 |     | 36841 |        |     |
| 11.1168837147011 | 200   | 150 | 0     | Open   | ;   |
| 36845            | 23223 |     | 36844 |        |     |
| 158.701322454143 | 100   | 140 | 0     | Open   | ;   |
| 36849            | 36847 |     | 20269 |        |     |
| 87.8252936024064 | 100   | 140 | 0     | Open   | ;   |
| 36851            | 23699 |     | 36850 |        |     |
| 13.8661190062971 | 150   | 140 | 0     | Closed | ;   |
| 36855            | 36853 |     | 21410 |        |     |
| 14.3303073108891 | 150   | 140 | 0     | Closed | ;   |
| 36857            | 22240 |     | 36856 |        |     |
| 541.008684282275 | 200   | 140 | 0     | Open   | ;   |
| 36860            | 20881 |     | 36859 |        |     |
| 11.7355617434054 | 110   | 150 | 0     | Open   | ;   |
| 36864            | 36862 |     | 22277 |        |     |
| 76.4117997207238 | 200   | 150 | 0     | Open   | ;   |
| 36867            | 36865 |     | 20610 |        |     |
| 93.7929098206227 | 75    | 140 | 0     | Open   | ;   |
| 36870            | 36868 |     | 21741 |        |     |
| 23.5895505715474 | 110   | 150 | 0     | Open   | ;   |
| 36872            | 22843 |     | 36871 |        |     |
| 194.16325016765  | 400   | 130 | 0     | Open   | ;   |
| 36875            | 25046 |     | 36874 |        |     |
| 101.794431059653 | 150   | 140 | 0     | Open   | ;   |
| 36878            | 35780 |     | 36877 |        |     |
| 128.239979030891 | 150   | 140 | 0     | Open   | ;   |
| 36879            | 22794 |     | 22000 |        | 600 |
| 396.6            | 140   | 0   | Open  | ;      |     |
| T-1              | 24851 |     | 20115 |        | 400 |
| 500              | 150   | 0   | Open  | ;      |     |
| 29410            | PS2   |     | 20116 |        |     |



|                 |     |     |     |       |      |    |
|-----------------|-----|-----|-----|-------|------|----|
| 17.815126210189 | 400 |     | 150 | 0     | Open | ;  |
| T-2             |     | PS3 |     | 24943 |      | 15 |
| 100             | 130 |     | 0   | Open  | ;    |    |

  

|         |  |       |  |       |  |            |
|---------|--|-------|--|-------|--|------------|
| [PUMPS] |  |       |  |       |  |            |
| ;ID     |  | Node1 |  | Node2 |  | Parameters |

  

|          |         |           |  |       |  |          |
|----------|---------|-----------|--|-------|--|----------|
| [VALVES] |         |           |  |       |  |          |
| ;ID      |         | Node1     |  | Node2 |  | Diameter |
| Type     | Setting | MinorLoss |  |       |  |          |

  

|        |  |  |  |  |  |  |
|--------|--|--|--|--|--|--|
| [TAGS] |  |  |  |  |  |  |
|--------|--|--|--|--|--|--|

  

|           |  |        |  |         |  |          |
|-----------|--|--------|--|---------|--|----------|
| [DEMANDS] |  |        |  |         |  |          |
| ;Junction |  | Demand |  | Pattern |  | Category |

  

|          |  |                |  |  |  |  |
|----------|--|----------------|--|--|--|--|
| [STATUS] |  |                |  |  |  |  |
| ;ID      |  | Status/Setting |  |  |  |  |

  

|            |       |             |       |       |       |  |
|------------|-------|-------------|-------|-------|-------|--|
| [PATTERNS] |       |             |       |       |       |  |
| ;ID        |       | Multipliers |       |       |       |  |
| ;SEMANA    |       |             |       |       |       |  |
| 1          |       | 0.654       | 0.587 | 0.550 | 0.542 |  |
| 0.542      | 0.581 |             |       |       |       |  |
| 1          |       | 0.782       | 1.121 | 1.103 | 1.176 |  |
| 1.277      | 1.318 |             |       |       |       |  |
| 1          |       | 1.325       | 1.298 | 1.305 | 1.285 |  |
| 1.200      | 1.177 |             |       |       |       |  |
| 1          |       | 1.185       | 1.136 | 1.093 | 1.087 |  |
| 0.918      | 0.759 |             |       |       |       |  |
| ;          |       |             |       |       |       |  |
| 3          |       | 1           | 1     | 1     | 1     |  |
| 1          | 1     |             |       |       |       |  |
| 3          |       | 1           | 1     | 1     | 1     |  |
| 1          | 1     |             |       |       |       |  |
| 3          |       | 1           | 1     | 1     | 1     |  |
| 1          | 1     |             |       |       |       |  |
| 3          |       | 1           | 1     | 1     | 1     |  |
| 1          | 1     |             |       |       |       |  |

  

|          |  |         |  |         |  |  |
|----------|--|---------|--|---------|--|--|
| [CURVES] |  |         |  |         |  |  |
| ;ID      |  | X-Value |  | Y-Value |  |  |

  

|            |  |  |  |  |  |  |
|------------|--|--|--|--|--|--|
| [CONTROLS] |  |  |  |  |  |  |
|------------|--|--|--|--|--|--|

[RULES]

[ENERGY]

|                   |    |
|-------------------|----|
| Global Efficiency | 75 |
| Global Price      | 0  |
| Demand Charge     | 0  |

[EMITTERS]

| ;Junction | Coefficient |
|-----------|-------------|
| 18463     | 0           |
| 18464     | 0           |
| 18465     | 0           |
| 18466     | 0           |
| 18467     | 0           |
| 18468     | 0           |
| 18469     | 0           |
| 18470     | 0           |
| 18471     | 0           |
| 18472     | 0           |
| 18473     | 0           |
| 18474     | 0           |
| 18475     | 0           |
| 18476     | 0           |
| 18477     | 0           |
| 18478     | 0           |

|       |   |
|-------|---|
| 18479 | 0 |
| 18480 | 0 |
| 18481 | 0 |
| 18482 | 0 |
| 18483 | 0 |
| 18484 | 0 |
| 18485 | 0 |
| 18486 | 0 |
| 18487 | 0 |
| 18488 | 0 |
| 18489 | 0 |
| 18490 | 0 |
| 18491 | 0 |
| 18492 | 0 |
| 18493 | 0 |
| 18494 | 0 |
| 18495 | 0 |
| 18496 | 0 |
| 18497 | 0 |
| 18498 | 0 |
| 18499 | 0 |
| 18500 | 0 |
| 18501 | 0 |
| 18502 | 0 |
| 18503 | 0 |
| 18504 | 0 |
| 18505 | 0 |
| 18506 | 0 |
| 18507 | 0 |
| 18508 | 0 |
| 18509 | 0 |
| 18510 | 0 |
| 18511 | 0 |
| 18512 | 0 |
| 18513 | 0 |
| 18514 | 0 |
| 18515 | 0 |
| 18516 | 0 |
| 18517 | 0 |
| 18518 | 0 |
| 18519 | 0 |
| 18520 | 0 |
| 18521 | 0 |
| 18522 | 0 |
| 18523 | 0 |
| 18524 | 0 |
| 18525 | 0 |
| 18526 | 0 |
| 18527 | 0 |
| 18528 | 0 |

|       |   |
|-------|---|
| 18529 | 0 |
| 18530 | 0 |
| 18531 | 0 |
| 18532 | 0 |
| 18533 | 0 |
| 18534 | 0 |
| 18535 | 0 |
| 18536 | 0 |
| 18537 | 0 |
| 18538 | 0 |
| 18539 | 0 |
| 18540 | 0 |
| 18541 | 0 |
| 18542 | 0 |
| 18543 | 0 |
| 18544 | 0 |
| 18545 | 0 |
| 18546 | 0 |
| 18547 | 0 |
| 18548 | 0 |
| 18549 | 0 |
| 18550 | 0 |
| 18551 | 0 |
| 18552 | 0 |
| 18553 | 0 |
| 18554 | 0 |
| 18555 | 0 |
| 18556 | 0 |
| 18557 | 0 |
| 18558 | 0 |
| 18559 | 0 |
| 18560 | 0 |
| 18561 | 0 |
| 18562 | 0 |
| 18563 | 0 |
| 18564 | 0 |
| 18565 | 0 |
| 18566 | 0 |
| 18567 | 0 |
| 18568 | 0 |
| 18569 | 0 |
| 18570 | 0 |
| 18571 | 0 |
| 18572 | 0 |
| 18573 | 0 |
| 18574 | 0 |
| 18575 | 0 |
| 18576 | 0 |
| 18577 | 0 |
| 18578 | 0 |

|       |   |
|-------|---|
| 18579 | 0 |
| 18580 | 0 |
| 18581 | 0 |
| 18582 | 0 |
| 18583 | 0 |
| 18584 | 0 |
| 18585 | 0 |
| 18586 | 0 |
| 18587 | 0 |
| 18588 | 0 |
| 18589 | 0 |
| 18590 | 0 |
| 18591 | 0 |
| 18592 | 0 |
| 18593 | 0 |
| 18594 | 0 |
| 18595 | 0 |
| 18596 | 0 |
| 18597 | 0 |
| 18598 | 0 |
| 18599 | 0 |
| 18600 | 0 |
| 18601 | 0 |
| 18602 | 0 |
| 18603 | 0 |
| 18604 | 0 |
| 18605 | 0 |
| 18606 | 0 |
| 18607 | 0 |
| 18608 | 0 |
| 18609 | 0 |
| 18610 | 0 |
| 18611 | 0 |
| 18612 | 0 |
| 18613 | 0 |
| 18614 | 0 |
| 18615 | 0 |
| 18616 | 0 |
| 18617 | 0 |
| 18618 | 0 |
| 18619 | 0 |
| 18620 | 0 |
| 18621 | 0 |
| 18622 | 0 |
| 18623 | 0 |
| 18624 | 0 |
| 18625 | 0 |
| 18626 | 0 |
| 18627 | 0 |
| 18628 | 0 |

|       |   |
|-------|---|
| 18629 | 0 |
| 18630 | 0 |
| 18631 | 0 |
| 18632 | 0 |
| 18633 | 0 |
| 18634 | 0 |
| 18635 | 0 |
| 18636 | 0 |
| 18637 | 0 |
| 18638 | 0 |
| 18639 | 0 |
| 18640 | 0 |
| 18641 | 0 |
| 18642 | 0 |
| 18643 | 0 |
| 18644 | 0 |
| 18645 | 0 |
| 18646 | 0 |
| 18647 | 0 |
| 18648 | 0 |
| 18649 | 0 |
| 18650 | 0 |
| 18651 | 0 |
| 18652 | 0 |
| 18653 | 0 |
| 18654 | 0 |
| 18655 | 0 |
| 18656 | 0 |
| 18657 | 0 |
| 18658 | 0 |
| 18659 | 0 |
| 18660 | 0 |
| 18661 | 0 |
| 18662 | 0 |
| 18663 | 0 |
| 18664 | 0 |
| 18665 | 0 |
| 18666 | 0 |
| 18667 | 0 |
| 18668 | 0 |
| 18669 | 0 |
| 18670 | 0 |
| 18671 | 0 |
| 18672 | 0 |
| 18673 | 0 |
| 18674 | 0 |
| 18675 | 0 |
| 18676 | 0 |
| 18677 | 0 |
| 18678 | 0 |

|       |   |
|-------|---|
| 18679 | 0 |
| 18680 | 0 |
| 18681 | 0 |
| 18682 | 0 |
| 18683 | 0 |
| 18684 | 0 |
| 18685 | 0 |
| 18686 | 0 |
| 18687 | 0 |
| 18688 | 0 |
| 18689 | 0 |
| 18690 | 0 |
| 18691 | 0 |
| 18692 | 0 |
| 18693 | 0 |
| 18694 | 0 |
| 18695 | 0 |
| 18696 | 0 |
| 18697 | 0 |
| 18698 | 0 |
| 18699 | 0 |
| 18700 | 0 |
| 18701 | 0 |
| 18702 | 0 |
| 18703 | 0 |
| 18704 | 0 |
| 18705 | 0 |
| 18706 | 0 |
| 18707 | 0 |
| 18708 | 0 |
| 18709 | 0 |
| 18710 | 0 |
| 18711 | 0 |
| 18712 | 0 |
| 18713 | 0 |
| 18714 | 0 |
| 18715 | 0 |
| 18716 | 0 |
| 18717 | 0 |
| 18718 | 0 |
| 18719 | 0 |
| 18720 | 0 |
| 18721 | 0 |
| 18722 | 0 |
| 18723 | 0 |
| 18724 | 0 |
| 18725 | 0 |
| 18726 | 0 |
| 18727 | 0 |
| 18728 | 0 |

|       |   |
|-------|---|
| 18729 | 0 |
| 18730 | 0 |
| 18731 | 0 |
| 18732 | 0 |
| 18733 | 0 |
| 18734 | 0 |
| 18735 | 0 |
| 18736 | 0 |
| 18737 | 0 |
| 18738 | 0 |
| 18739 | 0 |
| 18740 | 0 |
| 18741 | 0 |
| 18742 | 0 |
| 18743 | 0 |
| 18744 | 0 |
| 18745 | 0 |
| 18746 | 0 |
| 18747 | 0 |
| 18748 | 0 |
| 18749 | 0 |
| 18750 | 0 |
| 18751 | 0 |
| 18752 | 0 |
| 18753 | 0 |
| 18754 | 0 |
| 18755 | 0 |
| 18756 | 0 |
| 18757 | 0 |
| 18758 | 0 |
| 18759 | 0 |
| 18760 | 0 |
| 18761 | 0 |
| 18762 | 0 |
| 18763 | 0 |
| 18764 | 0 |
| 18765 | 0 |
| 18766 | 0 |
| 18767 | 0 |
| 18768 | 0 |
| 18769 | 0 |
| 18770 | 0 |
| 18771 | 0 |
| 18772 | 0 |
| 18773 | 0 |
| 18774 | 0 |
| 18775 | 0 |
| 18776 | 0 |
| 18777 | 0 |
| 18778 | 0 |



|       |   |
|-------|---|
| 18779 | 0 |
| 18780 | 0 |
| 18781 | 0 |
| 18782 | 0 |
| 18783 | 0 |
| 18784 | 0 |
| 18785 | 0 |
| 18786 | 0 |
| 18787 | 0 |
| 18788 | 0 |
| 18789 | 0 |
| 18790 | 0 |
| 18791 | 0 |
| 18792 | 0 |
| 18793 | 0 |
| 18794 | 0 |
| 18795 | 0 |
| 18796 | 0 |
| 18797 | 0 |
| 18798 | 0 |
| 18799 | 0 |
| 18800 | 0 |
| 18801 | 0 |
| 18802 | 0 |
| 18803 | 0 |
| 18804 | 0 |
| 18805 | 0 |
| 18806 | 0 |
| 18807 | 0 |
| 18808 | 0 |
| 18809 | 0 |
| 18810 | 0 |
| 18811 | 0 |
| 18812 | 0 |
| 18813 | 0 |
| 18814 | 0 |
| 18815 | 0 |
| 18816 | 0 |
| 18817 | 0 |
| 18818 | 0 |
| 18820 | 0 |
| 18821 | 0 |
| 18822 | 0 |
| 18823 | 0 |
| 18824 | 0 |
| 18825 | 0 |
| 18826 | 0 |
| 18827 | 0 |
| 18828 | 0 |
| 18829 | 0 |

|       |   |
|-------|---|
| 18830 | 0 |
| 18831 | 0 |
| 18832 | 0 |
| 18833 | 0 |
| 18834 | 0 |
| 18835 | 0 |
| 18836 | 0 |
| 18837 | 0 |
| 18838 | 0 |
| 18839 | 0 |
| 18840 | 0 |
| 18841 | 0 |
| 18842 | 0 |
| 18843 | 0 |
| 18844 | 0 |
| 18845 | 0 |
| 18846 | 0 |
| 18847 | 0 |
| 18848 | 0 |
| 18849 | 0 |
| 18850 | 0 |
| 18851 | 0 |
| 18852 | 0 |
| 18853 | 0 |
| 18854 | 0 |
| 18855 | 0 |
| 18856 | 0 |
| 18857 | 0 |
| 18858 | 0 |
| 18859 | 0 |
| 18860 | 0 |
| 18861 | 0 |
| 18862 | 0 |
| 18863 | 0 |
| 18864 | 0 |
| 18865 | 0 |
| 18866 | 0 |
| 18867 | 0 |
| 18868 | 0 |
| 18869 | 0 |
| 18870 | 0 |
| 18871 | 0 |
| 18872 | 0 |
| 18873 | 0 |
| 18874 | 0 |
| 18875 | 0 |
| 18876 | 0 |
| 18877 | 0 |
| 18878 | 0 |
| 18879 | 0 |

|       |   |
|-------|---|
| 18880 | 0 |
| 18881 | 0 |
| 18882 | 0 |
| 18883 | 0 |
| 18884 | 0 |
| 18885 | 0 |
| 18886 | 0 |
| 18887 | 0 |
| 18888 | 0 |
| 18889 | 0 |
| 18890 | 0 |
| 18891 | 0 |
| 18892 | 0 |
| 18893 | 0 |
| 18894 | 0 |
| 18895 | 0 |
| 18896 | 0 |
| 18897 | 0 |
| 18898 | 0 |
| 18899 | 0 |
| 18900 | 0 |
| 18901 | 0 |
| 18902 | 0 |
| 18903 | 0 |
| 18904 | 0 |
| 18905 | 0 |
| 18906 | 0 |
| 18907 | 0 |
| 18908 | 0 |
| 18909 | 0 |
| 18910 | 0 |
| 18911 | 0 |
| 18912 | 0 |
| 18913 | 0 |
| 18914 | 0 |
| 18915 | 0 |
| 18916 | 0 |
| 18917 | 0 |
| 18918 | 0 |
| 18919 | 0 |
| 18920 | 0 |
| 18921 | 0 |
| 18922 | 0 |
| 18923 | 0 |
| 18924 | 0 |
| 18925 | 0 |
| 18926 | 0 |
| 18927 | 0 |
| 18928 | 0 |
| 18929 | 0 |

|       |   |
|-------|---|
| 18930 | 0 |
| 18931 | 0 |
| 18932 | 0 |
| 18933 | 0 |
| 18934 | 0 |
| 18935 | 0 |
| 18936 | 0 |
| 18937 | 0 |
| 18938 | 0 |
| 18939 | 0 |
| 18940 | 0 |
| 18941 | 0 |
| 18942 | 0 |
| 18943 | 0 |
| 18944 | 0 |
| 18945 | 0 |
| 18946 | 0 |
| 18947 | 0 |
| 18948 | 0 |
| 18949 | 0 |
| 18950 | 0 |
| 18951 | 0 |
| 18952 | 0 |
| 18953 | 0 |
| 18954 | 0 |
| 18955 | 0 |
| 18956 | 0 |
| 18957 | 0 |
| 18958 | 0 |
| 18959 | 0 |
| 18960 | 0 |
| 18961 | 0 |
| 18962 | 0 |
| 18963 | 0 |
| 18964 | 0 |
| 18965 | 0 |
| 18966 | 0 |
| 18967 | 0 |
| 18968 | 0 |
| 18969 | 0 |
| 18970 | 0 |
| 18971 | 0 |
| 18972 | 0 |
| 18973 | 0 |
| 18974 | 0 |
| 18975 | 0 |
| 18976 | 0 |
| 18977 | 0 |
| 18978 | 0 |
| 18979 | 0 |

|       |   |
|-------|---|
| 18980 | 0 |
| 18981 | 0 |
| 18982 | 0 |
| 18983 | 0 |
| 18984 | 0 |
| 18985 | 0 |
| 18986 | 0 |
| 18987 | 0 |
| 18988 | 0 |
| 18989 | 0 |
| 18990 | 0 |
| 18991 | 0 |
| 18992 | 0 |
| 18993 | 0 |
| 18994 | 0 |
| 18995 | 0 |
| 18996 | 0 |
| 18997 | 0 |
| 18998 | 0 |
| 18999 | 0 |
| 19000 | 0 |
| 19001 | 0 |
| 19002 | 0 |
| 19003 | 0 |
| 19004 | 0 |
| 19005 | 0 |
| 19006 | 0 |
| 19007 | 0 |
| 19008 | 0 |
| 19009 | 0 |
| 19010 | 0 |
| 19011 | 0 |
| 19012 | 0 |
| 19013 | 0 |
| 19014 | 0 |
| 19015 | 0 |
| 19016 | 0 |
| 19017 | 0 |
| 19018 | 0 |
| 19019 | 0 |
| 19020 | 0 |
| 19021 | 0 |
| 19022 | 0 |
| 19023 | 0 |
| 19024 | 0 |
| 19025 | 0 |
| 19026 | 0 |
| 19027 | 0 |
| 19028 | 0 |
| 19029 | 0 |

|       |   |
|-------|---|
| 19030 | 0 |
| 19031 | 0 |
| 19032 | 0 |
| 19033 | 0 |
| 19034 | 0 |
| 19035 | 0 |
| 19036 | 0 |
| 19037 | 0 |
| 19038 | 0 |
| 19039 | 0 |
| 19040 | 0 |
| 19041 | 0 |
| 19042 | 0 |
| 19043 | 0 |
| 19044 | 0 |
| 19045 | 0 |
| 19046 | 0 |
| 19047 | 0 |
| 19048 | 0 |
| 19049 | 0 |
| 19050 | 0 |
| 19051 | 0 |
| 19052 | 0 |
| 19053 | 0 |
| 19054 | 0 |
| 19055 | 0 |
| 19056 | 0 |
| 19057 | 0 |
| 19058 | 0 |
| 19059 | 0 |
| 19060 | 0 |
| 19061 | 0 |
| 19062 | 0 |
| 19063 | 0 |
| 19064 | 0 |
| 19065 | 0 |
| 19066 | 0 |
| 19067 | 0 |
| 19068 | 0 |
| 19069 | 0 |
| 19070 | 0 |
| 19071 | 0 |
| 19072 | 0 |
| 19073 | 0 |
| 19074 | 0 |
| 19075 | 0 |
| 19076 | 0 |
| 19077 | 0 |
| 19078 | 0 |
| 19079 | 0 |

|       |   |
|-------|---|
| 19080 | 0 |
| 19081 | 0 |
| 19082 | 0 |
| 19083 | 0 |
| 19084 | 0 |
| 19085 | 0 |
| 19086 | 0 |
| 19087 | 0 |
| 19088 | 0 |
| 19089 | 0 |
| 19090 | 0 |
| 19091 | 0 |
| 19092 | 0 |
| 19093 | 0 |
| 19094 | 0 |
| 19095 | 0 |
| 19096 | 0 |
| 19097 | 0 |
| 19098 | 0 |
| 19099 | 0 |
| 19100 | 0 |
| 19101 | 0 |
| 19102 | 0 |
| 19103 | 0 |
| 19104 | 0 |
| 19105 | 0 |
| 19106 | 0 |
| 19107 | 0 |
| 19108 | 0 |
| 19109 | 0 |
| 19110 | 0 |
| 19111 | 0 |
| 19112 | 0 |
| 19113 | 0 |
| 19114 | 0 |
| 19115 | 0 |
| 19116 | 0 |
| 19117 | 0 |
| 19118 | 0 |
| 19119 | 0 |
| 19120 | 0 |
| 19121 | 0 |
| 19122 | 0 |
| 19123 | 0 |
| 19124 | 0 |
| 19125 | 0 |
| 19126 | 0 |
| 19127 | 0 |
| 19128 | 0 |
| 19129 | 0 |

|       |   |
|-------|---|
| 19130 | 0 |
| 19131 | 0 |
| 19132 | 0 |
| 19133 | 0 |
| 19134 | 0 |
| 19135 | 0 |
| 19136 | 0 |
| 19137 | 0 |
| 19138 | 0 |
| 19139 | 0 |
| 19140 | 0 |
| 19141 | 0 |
| 19142 | 0 |
| 19143 | 0 |
| 19144 | 0 |
| 19145 | 0 |
| 19146 | 0 |
| 19147 | 0 |
| 19148 | 0 |
| 19149 | 0 |
| 19150 | 0 |
| 19151 | 0 |
| 19152 | 0 |
| 19153 | 0 |
| 19154 | 0 |
| 19155 | 0 |
| 19156 | 0 |
| 19157 | 0 |
| 19158 | 0 |
| 19159 | 0 |
| 19160 | 0 |
| 19161 | 0 |
| 19162 | 0 |
| 19163 | 0 |
| 19164 | 0 |
| 19165 | 0 |
| 19166 | 0 |
| 19167 | 0 |
| 19168 | 0 |
| 19169 | 0 |
| 19170 | 0 |
| 19171 | 0 |
| 19172 | 0 |
| 19173 | 0 |
| 19174 | 0 |
| 19175 | 0 |
| 19176 | 0 |
| 19177 | 0 |
| 19178 | 0 |
| 19179 | 0 |



|       |   |
|-------|---|
| 19180 | 0 |
| 19181 | 0 |
| 19182 | 0 |
| 19183 | 0 |
| 19184 | 0 |
| 19185 | 0 |
| 19186 | 0 |
| 19187 | 0 |
| 19188 | 0 |
| 19189 | 0 |
| 19190 | 0 |
| 19191 | 0 |
| 19192 | 0 |
| 19193 | 0 |
| 19194 | 0 |
| 19195 | 0 |
| 19196 | 0 |
| 19197 | 0 |
| 19198 | 0 |
| 19199 | 0 |
| 19200 | 0 |
| 19201 | 0 |
| 19202 | 0 |
| 19203 | 0 |
| 19204 | 0 |
| 19205 | 0 |
| 19206 | 0 |
| 19207 | 0 |
| 19208 | 0 |
| 19209 | 0 |
| 19210 | 0 |
| 19211 | 0 |
| 19212 | 0 |
| 19213 | 0 |
| 19214 | 0 |
| 19215 | 0 |
| 19216 | 0 |
| 19217 | 0 |
| 19218 | 0 |
| 19219 | 0 |
| 19220 | 0 |
| 19221 | 0 |
| 19222 | 0 |
| 19223 | 0 |
| 19224 | 0 |
| 19225 | 0 |
| 19226 | 0 |
| 19227 | 0 |
| 19228 | 0 |
| 19229 | 0 |

|       |   |
|-------|---|
| 19230 | 0 |
| 19231 | 0 |
| 19232 | 0 |
| 19233 | 0 |
| 19234 | 0 |
| 19235 | 0 |
| 19236 | 0 |
| 19237 | 0 |
| 19238 | 0 |
| 19239 | 0 |
| 19240 | 0 |
| 19241 | 0 |
| 19242 | 0 |
| 19243 | 0 |
| 19244 | 0 |
| 19245 | 0 |
| 19246 | 0 |
| 19247 | 0 |
| 19248 | 0 |
| 19249 | 0 |
| 19250 | 0 |
| 19251 | 0 |
| 19252 | 0 |
| 19253 | 0 |
| 19254 | 0 |
| 19255 | 0 |
| 19256 | 0 |
| 19257 | 0 |
| 19258 | 0 |
| 19259 | 0 |
| 19260 | 0 |
| 19261 | 0 |
| 19262 | 0 |
| 19263 | 0 |
| 19264 | 0 |
| 19265 | 0 |
| 19266 | 0 |
| 19267 | 0 |
| 19268 | 0 |
| 19269 | 0 |
| 19270 | 0 |
| 19271 | 0 |
| 19272 | 0 |
| 19273 | 0 |
| 19274 | 0 |
| 19275 | 0 |
| 19276 | 0 |
| 19277 | 0 |
| 19278 | 0 |
| 19279 | 0 |

|       |   |
|-------|---|
| 19280 | 0 |
| 19281 | 0 |
| 19282 | 0 |
| 19283 | 0 |
| 19284 | 0 |
| 19285 | 0 |
| 19286 | 0 |
| 19287 | 0 |
| 19288 | 0 |
| 19289 | 0 |
| 19290 | 0 |
| 19291 | 0 |
| 19292 | 0 |
| 19293 | 0 |
| 19294 | 0 |
| 19295 | 0 |
| 19296 | 0 |
| 19297 | 0 |
| 19298 | 0 |
| 19299 | 0 |
| 19300 | 0 |
| 19301 | 0 |
| 19302 | 0 |
| 19303 | 0 |
| 19304 | 0 |
| 19305 | 0 |
| 19306 | 0 |
| 19307 | 0 |
| 19308 | 0 |
| 19309 | 0 |
| 19310 | 0 |
| 19311 | 0 |
| 19312 | 0 |
| 19313 | 0 |
| 19314 | 0 |
| 19315 | 0 |
| 19316 | 0 |
| 19317 | 0 |
| 19318 | 0 |
| 19319 | 0 |
| 19320 | 0 |
| 19321 | 0 |
| 19322 | 0 |
| 19323 | 0 |
| 19324 | 0 |
| 19325 | 0 |
| 19326 | 0 |
| 19327 | 0 |
| 19328 | 0 |
| 19329 | 0 |

|       |   |
|-------|---|
| 19330 | 0 |
| 19331 | 0 |
| 19332 | 0 |
| 19333 | 0 |
| 19334 | 0 |
| 19335 | 0 |
| 19336 | 0 |
| 19337 | 0 |
| 19338 | 0 |
| 19339 | 0 |
| 19340 | 0 |
| 19341 | 0 |
| 19342 | 0 |
| 19343 | 0 |
| 19344 | 0 |
| 19345 | 0 |
| 19346 | 0 |
| 19347 | 0 |
| 19348 | 0 |
| 19349 | 0 |
| 19350 | 0 |
| 19351 | 0 |
| 19352 | 0 |
| 19353 | 0 |
| 19354 | 0 |
| 19355 | 0 |
| 19356 | 0 |
| 19357 | 0 |
| 19358 | 0 |
| 19359 | 0 |
| 19360 | 0 |
| 19361 | 0 |
| 19362 | 0 |
| 19363 | 0 |
| 19364 | 0 |
| 19365 | 0 |
| 19366 | 0 |
| 19367 | 0 |
| 19368 | 0 |
| 19369 | 0 |
| 19370 | 0 |
| 19371 | 0 |
| 19372 | 0 |
| 19373 | 0 |
| 19374 | 0 |
| 19375 | 0 |
| 19376 | 0 |
| 19377 | 0 |
| 19378 | 0 |
| 19379 | 0 |

|       |   |
|-------|---|
| 19380 | 0 |
| 19381 | 0 |
| 19382 | 0 |
| 19383 | 0 |
| 19384 | 0 |
| 19385 | 0 |
| 19386 | 0 |
| 19387 | 0 |
| 19388 | 0 |
| 19389 | 0 |
| 19390 | 0 |
| 19391 | 0 |
| 19392 | 0 |
| 19393 | 0 |
| 19394 | 0 |
| 19395 | 0 |
| 19396 | 0 |
| 19397 | 0 |
| 19398 | 0 |
| 19399 | 0 |
| 19400 | 0 |
| 19401 | 0 |
| 19402 | 0 |
| 19403 | 0 |
| 19404 | 0 |
| 19405 | 0 |
| 19406 | 0 |
| 19407 | 0 |
| 19408 | 0 |
| 19409 | 0 |
| 19410 | 0 |
| 19411 | 0 |
| 19412 | 0 |
| 19413 | 0 |
| 19414 | 0 |
| 19415 | 0 |
| 19416 | 0 |
| 19417 | 0 |
| 19418 | 0 |
| 19419 | 0 |
| 19420 | 0 |
| 19421 | 0 |
| 19422 | 0 |
| 19423 | 0 |
| 19424 | 0 |
| 19425 | 0 |
| 19426 | 0 |
| 19427 | 0 |
| 19428 | 0 |
| 19429 | 0 |

|       |   |
|-------|---|
| 19430 | 0 |
| 19431 | 0 |
| 19432 | 0 |
| 19433 | 0 |
| 19434 | 0 |
| 19435 | 0 |
| 19436 | 0 |
| 19437 | 0 |
| 19438 | 0 |
| 19439 | 0 |
| 19440 | 0 |
| 19441 | 0 |
| 19442 | 0 |
| 19443 | 0 |
| 19444 | 0 |
| 19445 | 0 |
| 19446 | 0 |
| 19447 | 0 |
| 19448 | 0 |
| 19449 | 0 |
| 19450 | 0 |
| 19451 | 0 |
| 19452 | 0 |
| 19453 | 0 |
| 19454 | 0 |
| 19455 | 0 |
| 19456 | 0 |
| 19457 | 0 |
| 19458 | 0 |
| 19459 | 0 |
| 19460 | 0 |
| 19461 | 0 |
| 19462 | 0 |
| 19463 | 0 |
| 19464 | 0 |
| 19465 | 0 |
| 19466 | 0 |
| 19467 | 0 |
| 19468 | 0 |
| 19469 | 0 |
| 19470 | 0 |
| 19471 | 0 |
| 19472 | 0 |
| 19473 | 0 |
| 19474 | 0 |
| 19475 | 0 |
| 19476 | 0 |
| 19477 | 0 |
| 19478 | 0 |
| 19479 | 0 |

|       |   |
|-------|---|
| 19480 | 0 |
| 19481 | 0 |
| 19482 | 0 |
| 19483 | 0 |
| 19484 | 0 |
| 19485 | 0 |
| 19486 | 0 |
| 19487 | 0 |
| 19488 | 0 |
| 19489 | 0 |
| 19490 | 0 |
| 19491 | 0 |
| 19492 | 0 |
| 19493 | 0 |
| 19494 | 0 |
| 19495 | 0 |
| 19496 | 0 |
| 19497 | 0 |
| 19498 | 0 |
| 19499 | 0 |
| 19500 | 0 |
| 19501 | 0 |
| 19502 | 0 |
| 19503 | 0 |
| 19504 | 0 |
| 19505 | 0 |
| 19506 | 0 |
| 19507 | 0 |
| 19508 | 0 |
| 19509 | 0 |
| 19510 | 0 |
| 19511 | 0 |
| 19512 | 0 |
| 19513 | 0 |
| 19514 | 0 |
| 19515 | 0 |
| 19516 | 0 |
| 19517 | 0 |
| 19518 | 0 |
| 19519 | 0 |
| 19520 | 0 |
| 19521 | 0 |
| 19522 | 0 |
| 19523 | 0 |
| 19524 | 0 |
| 19525 | 0 |
| 19526 | 0 |
| 19527 | 0 |
| 19528 | 0 |
| 19529 | 0 |

|       |   |
|-------|---|
| 19530 | 0 |
| 19531 | 0 |
| 19532 | 0 |
| 19533 | 0 |
| 19534 | 0 |
| 19535 | 0 |
| 19536 | 0 |
| 19537 | 0 |
| 19538 | 0 |
| 19539 | 0 |
| 19540 | 0 |
| 19541 | 0 |
| 19542 | 0 |
| 19543 | 0 |
| 19544 | 0 |
| 19545 | 0 |
| 19546 | 0 |
| 19547 | 0 |
| 19548 | 0 |
| 19549 | 0 |
| 19550 | 0 |
| 19551 | 0 |
| 19552 | 0 |
| 19553 | 0 |
| 19554 | 0 |
| 19555 | 0 |
| 19556 | 0 |
| 19557 | 0 |
| 19558 | 0 |
| 19559 | 0 |
| 19560 | 0 |
| 19561 | 0 |
| 19562 | 0 |
| 19563 | 0 |
| 19564 | 0 |
| 19565 | 0 |
| 19566 | 0 |
| 19567 | 0 |
| 19568 | 0 |
| 19569 | 0 |
| 19570 | 0 |
| 19571 | 0 |
| 19572 | 0 |
| 19573 | 0 |
| 19574 | 0 |
| 19575 | 0 |
| 19576 | 0 |
| 19577 | 0 |
| 19578 | 0 |
| 19579 | 0 |



|       |   |
|-------|---|
| 19580 | 0 |
| 19581 | 0 |
| 19582 | 0 |
| 19583 | 0 |
| 19584 | 0 |
| 19585 | 0 |
| 19586 | 0 |
| 19587 | 0 |
| 19588 | 0 |
| 19589 | 0 |
| 19590 | 0 |
| 19591 | 0 |
| 19592 | 0 |
| 19593 | 0 |
| 19594 | 0 |
| 19595 | 0 |
| 19596 | 0 |
| 19597 | 0 |
| 19598 | 0 |
| 19599 | 0 |
| 19600 | 0 |
| 19601 | 0 |
| 19602 | 0 |
| 19603 | 0 |
| 19604 | 0 |
| 19605 | 0 |
| 19606 | 0 |
| 19607 | 0 |
| 19608 | 0 |
| 19609 | 0 |
| 19610 | 0 |
| 19611 | 0 |
| 19612 | 0 |
| 19613 | 0 |
| 19614 | 0 |
| 19615 | 0 |
| 19616 | 0 |
| 19617 | 0 |
| 19618 | 0 |
| 19619 | 0 |
| 19620 | 0 |
| 19621 | 0 |
| 19622 | 0 |
| 19623 | 0 |
| 19624 | 0 |
| 19625 | 0 |
| 19626 | 0 |
| 19627 | 0 |
| 19628 | 0 |
| 19629 | 0 |

|       |   |
|-------|---|
| 19630 | 0 |
| 19631 | 0 |
| 19632 | 0 |
| 19633 | 0 |
| 19634 | 0 |
| 19635 | 0 |
| 19636 | 0 |
| 19637 | 0 |
| 19638 | 0 |
| 19639 | 0 |
| 19640 | 0 |
| 19641 | 0 |
| 19642 | 0 |
| 19643 | 0 |
| 19644 | 0 |
| 19645 | 0 |
| 19646 | 0 |
| 19647 | 0 |
| 19648 | 0 |
| 19649 | 0 |
| 19650 | 0 |
| 19651 | 0 |
| 19652 | 0 |
| 19653 | 0 |
| 19654 | 0 |
| 19655 | 0 |
| 19656 | 0 |
| 19657 | 0 |
| 19658 | 0 |
| 19659 | 0 |
| 19660 | 0 |
| 19661 | 0 |
| 19662 | 0 |
| 19663 | 0 |
| 19664 | 0 |
| 19665 | 0 |
| 19666 | 0 |
| 19667 | 0 |
| 19668 | 0 |
| 19669 | 0 |
| 19670 | 0 |
| 19671 | 0 |
| 19672 | 0 |
| 19673 | 0 |
| 19674 | 0 |
| 19675 | 0 |
| 19676 | 0 |
| 19677 | 0 |
| 19678 | 0 |
| 19679 | 0 |

|       |   |
|-------|---|
| 19680 | 0 |
| 19681 | 0 |
| 19682 | 0 |
| 19683 | 0 |
| 19684 | 0 |
| 19685 | 0 |
| 19686 | 0 |
| 19687 | 0 |
| 19688 | 0 |
| 19689 | 0 |
| 19690 | 0 |
| 19691 | 0 |
| 19692 | 0 |
| 19693 | 0 |
| 19694 | 0 |
| 19695 | 0 |
| 19696 | 0 |
| 19697 | 0 |
| 19698 | 0 |
| 19699 | 0 |
| 19700 | 0 |
| 19701 | 0 |
| 19702 | 0 |
| 19703 | 0 |
| 19704 | 0 |
| 19705 | 0 |
| 19706 | 0 |
| 19707 | 0 |
| 19708 | 0 |
| 19709 | 0 |
| 19710 | 0 |
| 19711 | 0 |
| 19712 | 0 |
| 19713 | 0 |
| 19714 | 0 |
| 19715 | 0 |
| 19716 | 0 |
| 19717 | 0 |
| 19718 | 0 |
| 19719 | 0 |
| 19720 | 0 |
| 19721 | 0 |
| 19722 | 0 |
| 19723 | 0 |
| 19724 | 0 |
| 19725 | 0 |
| 19726 | 0 |
| 19727 | 0 |
| 19728 | 0 |
| 19729 | 0 |

|       |   |
|-------|---|
| 19730 | 0 |
| 19731 | 0 |
| 19732 | 0 |
| 19733 | 0 |
| 19734 | 0 |
| 19735 | 0 |
| 19736 | 0 |
| 19737 | 0 |
| 19738 | 0 |
| 19739 | 0 |
| 19740 | 0 |
| 19741 | 0 |
| 19742 | 0 |
| 19743 | 0 |
| 19744 | 0 |
| 19745 | 0 |
| 19746 | 0 |
| 19747 | 0 |
| 19748 | 0 |
| 19749 | 0 |
| 19750 | 0 |
| 19751 | 0 |
| 19752 | 0 |
| 19753 | 0 |
| 19754 | 0 |
| 19755 | 0 |
| 19756 | 0 |
| 19757 | 0 |
| 19758 | 0 |
| 19759 | 0 |
| 19760 | 0 |
| 19761 | 0 |
| 19762 | 0 |
| 19763 | 0 |
| 19764 | 0 |
| 19765 | 0 |
| 19766 | 0 |
| 19767 | 0 |
| 19768 | 0 |
| 19769 | 0 |
| 19770 | 0 |
| 19771 | 0 |
| 19772 | 0 |
| 19773 | 0 |
| 19774 | 0 |
| 19775 | 0 |
| 19776 | 0 |
| 19777 | 0 |
| 19778 | 0 |
| 19779 | 0 |

|       |   |
|-------|---|
| 19780 | 0 |
| 19781 | 0 |
| 19782 | 0 |
| 19783 | 0 |
| 19784 | 0 |
| 19785 | 0 |
| 19786 | 0 |
| 19787 | 0 |
| 19788 | 0 |
| 19789 | 0 |
| 19790 | 0 |
| 19791 | 0 |
| 19792 | 0 |
| 19793 | 0 |
| 19794 | 0 |
| 19795 | 0 |
| 19796 | 0 |
| 19797 | 0 |
| 19798 | 0 |
| 19799 | 0 |
| 19800 | 0 |
| 19801 | 0 |
| 19802 | 0 |
| 19803 | 0 |
| 19804 | 0 |
| 19805 | 0 |
| 19806 | 0 |
| 19807 | 0 |
| 19808 | 0 |
| 19809 | 0 |
| 19810 | 0 |
| 19811 | 0 |
| 19812 | 0 |
| 19813 | 0 |
| 19814 | 0 |
| 19815 | 0 |
| 19816 | 0 |
| 19817 | 0 |
| 19818 | 0 |
| 19819 | 0 |
| 19820 | 0 |
| 19821 | 0 |
| 19822 | 0 |
| 19823 | 0 |
| 19824 | 0 |
| 19825 | 0 |
| 19826 | 0 |
| 19827 | 0 |
| 19828 | 0 |
| 19829 | 0 |

|       |   |
|-------|---|
| 19830 | 0 |
| 19831 | 0 |
| 19832 | 0 |
| 19833 | 0 |
| 19834 | 0 |
| 19835 | 0 |
| 19836 | 0 |
| 19837 | 0 |
| 19838 | 0 |
| 19839 | 0 |
| 19840 | 0 |
| 19841 | 0 |
| 19842 | 0 |
| 19843 | 0 |
| 19844 | 0 |
| 19845 | 0 |
| 19846 | 0 |
| 19847 | 0 |
| 19848 | 0 |
| 19849 | 0 |
| 19850 | 0 |
| 19851 | 0 |
| 19852 | 0 |
| 19853 | 0 |
| 19854 | 0 |
| 19855 | 0 |
| 19856 | 0 |
| 19857 | 0 |
| 19858 | 0 |
| 19859 | 0 |
| 19860 | 0 |
| 19861 | 0 |
| 19862 | 0 |
| 19863 | 0 |
| 19864 | 0 |
| 19865 | 0 |
| 19866 | 0 |
| 19867 | 0 |
| 19868 | 0 |
| 19869 | 0 |
| 19870 | 0 |
| 19871 | 0 |
| 19872 | 0 |
| 19873 | 0 |
| 19874 | 0 |
| 19875 | 0 |
| 19876 | 0 |
| 19877 | 0 |
| 19878 | 0 |
| 19879 | 0 |

|       |   |
|-------|---|
| 19880 | 0 |
| 19881 | 0 |
| 19882 | 0 |
| 19883 | 0 |
| 19884 | 0 |
| 19885 | 0 |
| 19886 | 0 |
| 19887 | 0 |
| 19888 | 0 |
| 19889 | 0 |
| 19890 | 0 |
| 19891 | 0 |
| 19892 | 0 |
| 19893 | 0 |
| 19894 | 0 |
| 19895 | 0 |
| 19896 | 0 |
| 19897 | 0 |
| 19898 | 0 |
| 19899 | 0 |
| 19900 | 0 |
| 19901 | 0 |
| 19902 | 0 |
| 19903 | 0 |
| 19904 | 0 |
| 19905 | 0 |
| 19906 | 0 |
| 19907 | 0 |
| 19908 | 0 |
| 19909 | 0 |
| 19910 | 0 |
| 19911 | 0 |
| 19912 | 0 |
| 19913 | 0 |
| 19914 | 0 |
| 19915 | 0 |
| 19916 | 0 |
| 19917 | 0 |
| 19918 | 0 |
| 19919 | 0 |
| 19920 | 0 |
| 19921 | 0 |
| 19922 | 0 |
| 19923 | 0 |
| 19924 | 0 |
| 19925 | 0 |
| 19926 | 0 |
| 19927 | 0 |
| 19928 | 0 |
| 19929 | 0 |

|       |   |
|-------|---|
| 19930 | 0 |
| 19931 | 0 |
| 19932 | 0 |
| 19933 | 0 |
| 19934 | 0 |
| 19935 | 0 |
| 19936 | 0 |
| 19937 | 0 |
| 19938 | 0 |
| 19939 | 0 |
| 19940 | 0 |
| 19941 | 0 |
| 19942 | 0 |
| 19943 | 0 |
| 19944 | 0 |
| 19945 | 0 |
| 19946 | 0 |
| 19947 | 0 |
| 19948 | 0 |
| 19949 | 0 |
| 19950 | 0 |
| 19951 | 0 |
| 19952 | 0 |
| 19953 | 0 |
| 19954 | 0 |
| 19955 | 0 |
| 19956 | 0 |
| 19957 | 0 |
| 19958 | 0 |
| 19959 | 0 |
| 19960 | 0 |
| 19961 | 0 |
| 19962 | 0 |
| 19963 | 0 |
| 19964 | 0 |
| 19965 | 0 |
| 19966 | 0 |
| 19967 | 0 |
| 19968 | 0 |
| 19969 | 0 |
| 19970 | 0 |
| 19971 | 0 |
| 19972 | 0 |
| 19973 | 0 |
| 19974 | 0 |
| 19975 | 0 |
| 19976 | 0 |
| 19977 | 0 |
| 19978 | 0 |
| 19979 | 0 |



|       |   |
|-------|---|
| 19980 | 0 |
| 19981 | 0 |
| 19982 | 0 |
| 19983 | 0 |
| 19984 | 0 |
| 19985 | 0 |
| 19986 | 0 |
| 19987 | 0 |
| 19988 | 0 |
| 19989 | 0 |
| 19990 | 0 |
| 19991 | 0 |
| 19992 | 0 |
| 19993 | 0 |
| 19994 | 0 |
| 19995 | 0 |
| 19996 | 0 |
| 19997 | 0 |
| 19998 | 0 |
| 19999 | 0 |
| 20000 | 0 |
| 20001 | 0 |
| 20002 | 0 |
| 20003 | 0 |
| 20004 | 0 |
| 20005 | 0 |
| 20006 | 0 |
| 20007 | 0 |
| 20008 | 0 |
| 20009 | 0 |
| 20010 | 0 |
| 20011 | 0 |
| 20012 | 0 |
| 20013 | 0 |
| 20014 | 0 |
| 20015 | 0 |
| 20016 | 0 |
| 20017 | 0 |
| 20018 | 0 |
| 20019 | 0 |
| 20020 | 0 |
| 20021 | 0 |
| 20022 | 0 |
| 20023 | 0 |
| 20024 | 0 |
| 20025 | 0 |
| 20026 | 0 |
| 20027 | 0 |
| 20028 | 0 |
| 20029 | 0 |

|       |   |
|-------|---|
| 20030 | 0 |
| 20031 | 0 |
| 20032 | 0 |
| 20033 | 0 |
| 20034 | 0 |
| 20035 | 0 |
| 20036 | 0 |
| 20037 | 0 |
| 20038 | 0 |
| 20039 | 0 |
| 20040 | 0 |
| 20041 | 0 |
| 20042 | 0 |
| 20043 | 0 |
| 20044 | 0 |
| 20045 | 0 |
| 20046 | 0 |
| 20047 | 0 |
| 20048 | 0 |
| 20049 | 0 |
| 20050 | 0 |
| 20051 | 0 |
| 20052 | 0 |
| 20053 | 0 |
| 20054 | 0 |
| 20055 | 0 |
| 20056 | 0 |
| 20057 | 0 |
| 20058 | 0 |
| 20059 | 0 |
| 20060 | 0 |
| 20061 | 0 |
| 20062 | 0 |
| 20063 | 0 |
| 20064 | 0 |
| 20065 | 0 |
| 20066 | 0 |
| 20067 | 0 |
| 20068 | 0 |
| 20069 | 0 |
| 20070 | 0 |
| 20071 | 0 |
| 20072 | 0 |
| 20073 | 0 |
| 20074 | 0 |
| 20075 | 0 |
| 20076 | 0 |
| 20077 | 0 |
| 20078 | 0 |
| 20079 | 0 |

|       |   |
|-------|---|
| 20080 | 0 |
| 20081 | 0 |
| 20082 | 0 |
| 20083 | 0 |
| 20084 | 0 |
| 20085 | 0 |
| 20086 | 0 |
| 20087 | 0 |
| 20088 | 0 |
| 20089 | 0 |
| 20090 | 0 |
| 20091 | 0 |
| 20092 | 0 |
| 20093 | 0 |
| 20094 | 0 |
| 20095 | 0 |
| 20096 | 0 |
| 20097 | 0 |
| 20098 | 0 |
| 20099 | 0 |
| 20100 | 0 |
| 20101 | 0 |
| 20102 | 0 |
| 20103 | 0 |
| 20104 | 0 |
| 20105 | 0 |
| 20106 | 0 |
| 20107 | 0 |
| 20108 | 0 |
| 20109 | 0 |
| 20110 | 0 |
| 20111 | 0 |
| 20112 | 0 |
| 20113 | 0 |
| 20114 | 0 |
| 20115 | 0 |
| 20116 | 0 |
| 20117 | 0 |
| 20118 | 0 |
| 20119 | 0 |
| 20120 | 0 |
| 20121 | 0 |
| 20122 | 0 |
| 20123 | 0 |
| 20124 | 0 |
| 20125 | 0 |
| 20126 | 0 |
| 20127 | 0 |
| 20128 | 0 |
| 20129 | 0 |

|       |   |
|-------|---|
| 20130 | 0 |
| 20131 | 0 |
| 20132 | 0 |
| 20133 | 0 |
| 20134 | 0 |
| 20135 | 0 |
| 20136 | 0 |
| 20137 | 0 |
| 20138 | 0 |
| 20139 | 0 |
| 20140 | 0 |
| 20141 | 0 |
| 20142 | 0 |
| 20143 | 0 |
| 20144 | 0 |
| 20145 | 0 |
| 20147 | 0 |
| 20148 | 0 |
| 20149 | 0 |
| 20150 | 0 |
| 20151 | 0 |
| 20152 | 0 |
| 20153 | 0 |
| 20154 | 0 |
| 20155 | 0 |
| 20156 | 0 |
| 20157 | 0 |
| 20158 | 0 |
| 20159 | 0 |
| 20160 | 0 |
| 20161 | 0 |
| 20162 | 0 |
| 20163 | 0 |
| 20164 | 0 |
| 20165 | 0 |
| 20166 | 0 |
| 20167 | 0 |
| 20168 | 0 |
| 20169 | 0 |
| 20170 | 0 |
| 20171 | 0 |
| 20172 | 0 |
| 20173 | 0 |
| 20174 | 0 |
| 20175 | 0 |
| 20176 | 0 |
| 20177 | 0 |
| 20178 | 0 |
| 20179 | 0 |
| 20180 | 0 |

|       |   |
|-------|---|
| 20181 | 0 |
| 20182 | 0 |
| 20183 | 0 |
| 20184 | 0 |
| 20185 | 0 |
| 20186 | 0 |
| 20187 | 0 |
| 20188 | 0 |
| 20189 | 0 |
| 20190 | 0 |
| 20191 | 0 |
| 20192 | 0 |
| 20193 | 0 |
| 20194 | 0 |
| 20195 | 0 |
| 20196 | 0 |
| 20197 | 0 |
| 20198 | 0 |
| 20199 | 0 |
| 20200 | 0 |
| 20201 | 0 |
| 20202 | 0 |
| 20203 | 0 |
| 20204 | 0 |
| 20205 | 0 |
| 20206 | 0 |
| 20207 | 0 |
| 20208 | 0 |
| 20209 | 0 |
| 20210 | 0 |
| 20211 | 0 |
| 20212 | 0 |
| 20213 | 0 |
| 20214 | 0 |
| 20215 | 0 |
| 20216 | 0 |
| 20217 | 0 |
| 20218 | 0 |
| 20219 | 0 |
| 20220 | 0 |
| 20221 | 0 |
| 20222 | 0 |
| 20223 | 0 |
| 20224 | 0 |
| 20225 | 0 |
| 20226 | 0 |
| 20227 | 0 |
| 20228 | 0 |
| 20229 | 0 |
| 20230 | 0 |

|       |   |
|-------|---|
| 20231 | 0 |
| 20232 | 0 |
| 20233 | 0 |
| 20234 | 0 |
| 20235 | 0 |
| 20236 | 0 |
| 20237 | 0 |
| 20238 | 0 |
| 20239 | 0 |
| 20240 | 0 |
| 20241 | 0 |
| 20242 | 0 |
| 20243 | 0 |
| 20244 | 0 |
| 20245 | 0 |
| 20246 | 0 |
| 20247 | 0 |
| 20248 | 0 |
| 20249 | 0 |
| 20250 | 0 |
| 20251 | 0 |
| 20252 | 0 |
| 20253 | 0 |
| 20254 | 0 |
| 20255 | 0 |
| 20256 | 0 |
| 20257 | 0 |
| 20258 | 0 |
| 20259 | 0 |
| 20260 | 0 |
| 20261 | 0 |
| 20262 | 0 |
| 20263 | 0 |
| 20264 | 0 |
| 20265 | 0 |
| 20266 | 0 |
| 20267 | 0 |
| 20268 | 0 |
| 20269 | 0 |
| 20270 | 0 |
| 20271 | 0 |
| 20272 | 0 |
| 20273 | 0 |
| 20274 | 0 |
| 20275 | 0 |
| 20276 | 0 |
| 20277 | 0 |
| 20278 | 0 |
| 20279 | 0 |
| 20280 | 0 |

|       |   |
|-------|---|
| 20281 | 0 |
| 20282 | 0 |
| 20283 | 0 |
| 20284 | 0 |
| 20285 | 0 |
| 20286 | 0 |
| 20287 | 0 |
| 20288 | 0 |
| 20289 | 0 |
| 20290 | 0 |
| 20291 | 0 |
| 20292 | 0 |
| 20293 | 0 |
| 20294 | 0 |
| 20295 | 0 |
| 20296 | 0 |
| 20297 | 0 |
| 20298 | 0 |
| 20299 | 0 |
| 20300 | 0 |
| 20301 | 0 |
| 20302 | 0 |
| 20303 | 0 |
| 20304 | 0 |
| 20305 | 0 |
| 20306 | 0 |
| 20307 | 0 |
| 20308 | 0 |
| 20309 | 0 |
| 20310 | 0 |
| 20311 | 0 |
| 20312 | 0 |
| 20313 | 0 |
| 20314 | 0 |
| 20315 | 0 |
| 20316 | 0 |
| 20317 | 0 |
| 20318 | 0 |
| 20319 | 0 |
| 20320 | 0 |
| 20321 | 0 |
| 20322 | 0 |
| 20323 | 0 |
| 20324 | 0 |
| 20325 | 0 |
| 20326 | 0 |
| 20327 | 0 |
| 20328 | 0 |
| 20329 | 0 |
| 20330 | 0 |

|       |   |
|-------|---|
| 20331 | 0 |
| 20332 | 0 |
| 20333 | 0 |
| 20334 | 0 |
| 20335 | 0 |
| 20336 | 0 |
| 20337 | 0 |
| 20338 | 0 |
| 20339 | 0 |
| 20340 | 0 |
| 20341 | 0 |
| 20342 | 0 |
| 20343 | 0 |
| 20344 | 0 |
| 20345 | 0 |
| 20346 | 0 |
| 20347 | 0 |
| 20348 | 0 |
| 20349 | 0 |
| 20350 | 0 |
| 20351 | 0 |
| 20352 | 0 |
| 20353 | 0 |
| 20354 | 0 |
| 20355 | 0 |
| 20356 | 0 |
| 20357 | 0 |
| 20358 | 0 |
| 20359 | 0 |
| 20360 | 0 |
| 20361 | 0 |
| 20362 | 0 |
| 20363 | 0 |
| 20364 | 0 |
| 20365 | 0 |
| 20366 | 0 |
| 20367 | 0 |
| 20368 | 0 |
| 20369 | 0 |
| 20370 | 0 |
| 20371 | 0 |
| 20372 | 0 |
| 20373 | 0 |
| 20374 | 0 |
| 20375 | 0 |
| 20376 | 0 |
| 20377 | 0 |
| 20378 | 0 |
| 20379 | 0 |
| 20380 | 0 |



|       |   |
|-------|---|
| 20381 | 0 |
| 20382 | 0 |
| 20383 | 0 |
| 20384 | 0 |
| 20385 | 0 |
| 20386 | 0 |
| 20387 | 0 |
| 20388 | 0 |
| 20389 | 0 |
| 20390 | 0 |
| 20391 | 0 |
| 20392 | 0 |
| 20393 | 0 |
| 20394 | 0 |
| 20395 | 0 |
| 20396 | 0 |
| 20397 | 0 |
| 20398 | 0 |
| 20399 | 0 |
| 20400 | 0 |
| 20401 | 0 |
| 20402 | 0 |
| 20403 | 0 |
| 20404 | 0 |
| 20405 | 0 |
| 20406 | 0 |
| 20407 | 0 |
| 20408 | 0 |
| 20409 | 0 |
| 20410 | 0 |
| 20411 | 0 |
| 20412 | 0 |
| 20413 | 0 |
| 20414 | 0 |
| 20415 | 0 |
| 20416 | 0 |
| 20417 | 0 |
| 20418 | 0 |
| 20419 | 0 |
| 20420 | 0 |
| 20421 | 0 |
| 20422 | 0 |
| 20423 | 0 |
| 20424 | 0 |
| 20425 | 0 |
| 20426 | 0 |
| 20427 | 0 |
| 20428 | 0 |
| 20429 | 0 |
| 20430 | 0 |

|       |   |
|-------|---|
| 20431 | 0 |
| 20432 | 0 |
| 20433 | 0 |
| 20434 | 0 |
| 20435 | 0 |
| 20436 | 0 |
| 20437 | 0 |
| 20438 | 0 |
| 20439 | 0 |
| 20440 | 0 |
| 20441 | 0 |
| 20442 | 0 |
| 20443 | 0 |
| 20444 | 0 |
| 20445 | 0 |
| 20446 | 0 |
| 20447 | 0 |
| 20448 | 0 |
| 20449 | 0 |
| 20450 | 0 |
| 20451 | 0 |
| 20452 | 0 |
| 20453 | 0 |
| 20454 | 0 |
| 20455 | 0 |
| 20456 | 0 |
| 20457 | 0 |
| 20458 | 0 |
| 20459 | 0 |
| 20460 | 0 |
| 20461 | 0 |
| 20462 | 0 |
| 20463 | 0 |
| 20464 | 0 |
| 20465 | 0 |
| 20466 | 0 |
| 20467 | 0 |
| 20468 | 0 |
| 20469 | 0 |
| 20470 | 0 |
| 20471 | 0 |
| 20472 | 0 |
| 20473 | 0 |
| 20474 | 0 |
| 20475 | 0 |
| 20476 | 0 |
| 20477 | 0 |
| 20478 | 0 |
| 20479 | 0 |
| 20480 | 0 |

|       |   |
|-------|---|
| 20481 | 0 |
| 20482 | 0 |
| 20483 | 0 |
| 20484 | 0 |
| 20485 | 0 |
| 20486 | 0 |
| 20487 | 0 |
| 20488 | 0 |
| 20489 | 0 |
| 20490 | 0 |
| 20491 | 0 |
| 20492 | 0 |
| 20493 | 0 |
| 20494 | 0 |
| 20495 | 0 |
| 20496 | 0 |
| 20497 | 0 |
| 20498 | 0 |
| 20499 | 0 |
| 20500 | 0 |
| 20501 | 0 |
| 20502 | 0 |
| 20503 | 0 |
| 20504 | 0 |
| 20505 | 0 |
| 20506 | 0 |
| 20507 | 0 |
| 20508 | 0 |
| 20509 | 0 |
| 20510 | 0 |
| 20511 | 0 |
| 20512 | 0 |
| 20513 | 0 |
| 20514 | 0 |
| 20515 | 0 |
| 20516 | 0 |
| 20517 | 0 |
| 20518 | 0 |
| 20519 | 0 |
| 20520 | 0 |
| 20521 | 0 |
| 20522 | 0 |
| 20523 | 0 |
| 20524 | 0 |
| 20525 | 0 |
| 20526 | 0 |
| 20527 | 0 |
| 20528 | 0 |
| 20529 | 0 |
| 20530 | 0 |

|       |   |
|-------|---|
| 20531 | 0 |
| 20532 | 0 |
| 20533 | 0 |
| 20534 | 0 |
| 20535 | 0 |
| 20536 | 0 |
| 20537 | 0 |
| 20538 | 0 |
| 20539 | 0 |
| 20540 | 0 |
| 20541 | 0 |
| 20542 | 0 |
| 20543 | 0 |
| 20544 | 0 |
| 20545 | 0 |
| 20546 | 0 |
| 20547 | 0 |
| 20548 | 0 |
| 20549 | 0 |
| 20550 | 0 |
| 20551 | 0 |
| 20552 | 0 |
| 20553 | 0 |
| 20554 | 0 |
| 20555 | 0 |
| 20556 | 0 |
| 20557 | 0 |
| 20558 | 0 |
| 20559 | 0 |
| 20560 | 0 |
| 20561 | 0 |
| 20562 | 0 |
| 20563 | 0 |
| 20564 | 0 |
| 20565 | 0 |
| 20566 | 0 |
| 20567 | 0 |
| 20568 | 0 |
| 20569 | 0 |
| 20570 | 0 |
| 20571 | 0 |
| 20572 | 0 |
| 20573 | 0 |
| 20574 | 0 |
| 20575 | 0 |
| 20576 | 0 |
| 20577 | 0 |
| 20578 | 0 |
| 20579 | 0 |
| 20580 | 0 |

|       |   |
|-------|---|
| 20581 | 0 |
| 20582 | 0 |
| 20583 | 0 |
| 20584 | 0 |
| 20585 | 0 |
| 20586 | 0 |
| 20587 | 0 |
| 20588 | 0 |
| 20589 | 0 |
| 20590 | 0 |
| 20591 | 0 |
| 20592 | 0 |
| 20593 | 0 |
| 20594 | 0 |
| 20595 | 0 |
| 20596 | 0 |
| 20597 | 0 |
| 20598 | 0 |
| 20599 | 0 |
| 20600 | 0 |
| 20601 | 0 |
| 20602 | 0 |
| 20603 | 0 |
| 20604 | 0 |
| 20605 | 0 |
| 20606 | 0 |
| 20607 | 0 |
| 20608 | 0 |
| 20609 | 0 |
| 20610 | 0 |
| 20611 | 0 |
| 20612 | 0 |
| 20613 | 0 |
| 20614 | 0 |
| 20615 | 0 |
| 20616 | 0 |
| 20617 | 0 |
| 20618 | 0 |
| 20619 | 0 |
| 20620 | 0 |
| 20621 | 0 |
| 20622 | 0 |
| 20623 | 0 |
| 20624 | 0 |
| 20625 | 0 |
| 20626 | 0 |
| 20627 | 0 |
| 20628 | 0 |
| 20629 | 0 |
| 20630 | 0 |

|       |   |
|-------|---|
| 20631 | 0 |
| 20632 | 0 |
| 20633 | 0 |
| 20634 | 0 |
| 20635 | 0 |
| 20636 | 0 |
| 20637 | 0 |
| 20638 | 0 |
| 20639 | 0 |
| 20640 | 0 |
| 20641 | 0 |
| 20642 | 0 |
| 20643 | 0 |
| 20644 | 0 |
| 20645 | 0 |
| 20646 | 0 |
| 20647 | 0 |
| 20648 | 0 |
| 20649 | 0 |
| 20650 | 0 |
| 20651 | 0 |
| 20652 | 0 |
| 20653 | 0 |
| 20654 | 0 |
| 20655 | 0 |
| 20656 | 0 |
| 20657 | 0 |
| 20658 | 0 |
| 20659 | 0 |
| 20660 | 0 |
| 20661 | 0 |
| 20662 | 0 |
| 20663 | 0 |
| 20664 | 0 |
| 20665 | 0 |
| 20666 | 0 |
| 20667 | 0 |
| 20668 | 0 |
| 20669 | 0 |
| 20670 | 0 |
| 20671 | 0 |
| 20672 | 0 |
| 20673 | 0 |
| 20674 | 0 |
| 20675 | 0 |
| 20676 | 0 |
| 20677 | 0 |
| 20678 | 0 |
| 20679 | 0 |
| 20680 | 0 |

|       |   |
|-------|---|
| 20681 | 0 |
| 20682 | 0 |
| 20683 | 0 |
| 20684 | 0 |
| 20685 | 0 |
| 20686 | 0 |
| 20687 | 0 |
| 20688 | 0 |
| 20689 | 0 |
| 20690 | 0 |
| 20691 | 0 |
| 20692 | 0 |
| 20693 | 0 |
| 20694 | 0 |
| 20695 | 0 |
| 20696 | 0 |
| 20697 | 0 |
| 20698 | 0 |
| 20699 | 0 |
| 20700 | 0 |
| 20701 | 0 |
| 20702 | 0 |
| 20703 | 0 |
| 20704 | 0 |
| 20705 | 0 |
| 20706 | 0 |
| 20707 | 0 |
| 20708 | 0 |
| 20709 | 0 |
| 20710 | 0 |
| 20711 | 0 |
| 20712 | 0 |
| 20713 | 0 |
| 20714 | 0 |
| 20715 | 0 |
| 20716 | 0 |
| 20717 | 0 |
| 20718 | 0 |
| 20719 | 0 |
| 20720 | 0 |
| 20721 | 0 |
| 20722 | 0 |
| 20723 | 0 |
| 20724 | 0 |
| 20725 | 0 |
| 20726 | 0 |
| 20727 | 0 |
| 20728 | 0 |
| 20729 | 0 |
| 20730 | 0 |

|       |   |
|-------|---|
| 20731 | 0 |
| 20732 | 0 |
| 20733 | 0 |
| 20734 | 0 |
| 20735 | 0 |
| 20736 | 0 |
| 20737 | 0 |
| 20738 | 0 |
| 20739 | 0 |
| 20740 | 0 |
| 20741 | 0 |
| 20742 | 0 |
| 20743 | 0 |
| 20744 | 0 |
| 20745 | 0 |
| 20746 | 0 |
| 20747 | 0 |
| 20748 | 0 |
| 20749 | 0 |
| 20750 | 0 |
| 20751 | 0 |
| 20752 | 0 |
| 20753 | 0 |
| 20754 | 0 |
| 20755 | 0 |
| 20756 | 0 |
| 20757 | 0 |
| 20758 | 0 |
| 20759 | 0 |
| 20760 | 0 |
| 20761 | 0 |
| 20762 | 0 |
| 20763 | 0 |
| 20764 | 0 |
| 20765 | 0 |
| 20766 | 0 |
| 20767 | 0 |
| 20768 | 0 |
| 20769 | 0 |
| 20770 | 0 |
| 20771 | 0 |
| 20772 | 0 |
| 20773 | 0 |
| 20774 | 0 |
| 20775 | 0 |
| 20776 | 0 |
| 20777 | 0 |
| 20778 | 0 |
| 20779 | 0 |
| 20780 | 0 |



|       |   |
|-------|---|
| 20781 | 0 |
| 20782 | 0 |
| 20783 | 0 |
| 20784 | 0 |
| 20785 | 0 |
| 20786 | 0 |
| 20787 | 0 |
| 20788 | 0 |
| 20789 | 0 |
| 20790 | 0 |
| 20791 | 0 |
| 20792 | 0 |
| 20793 | 0 |
| 20794 | 0 |
| 20795 | 0 |
| 20796 | 0 |
| 20797 | 0 |
| 20798 | 0 |
| 20799 | 0 |
| 20800 | 0 |
| 20801 | 0 |
| 20802 | 0 |
| 20803 | 0 |
| 20804 | 0 |
| 20805 | 0 |
| 20806 | 0 |
| 20807 | 0 |
| 20808 | 0 |
| 20809 | 0 |
| 20810 | 0 |
| 20811 | 0 |
| 20812 | 0 |
| 20813 | 0 |
| 20814 | 0 |
| 20815 | 0 |
| 20816 | 0 |
| 20817 | 0 |
| 20818 | 0 |
| 20819 | 0 |
| 20820 | 0 |
| 20821 | 0 |
| 20822 | 0 |
| 20823 | 0 |
| 20824 | 0 |
| 20825 | 0 |
| 20826 | 0 |
| 20827 | 0 |
| 20828 | 0 |
| 20829 | 0 |
| 20830 | 0 |

|       |   |
|-------|---|
| 20831 | 0 |
| 20832 | 0 |
| 20833 | 0 |
| 20834 | 0 |
| 20835 | 0 |
| 20836 | 0 |
| 20837 | 0 |
| 20838 | 0 |
| 20839 | 0 |
| 20840 | 0 |
| 20841 | 0 |
| 20842 | 0 |
| 20843 | 0 |
| 20844 | 0 |
| 20845 | 0 |
| 20846 | 0 |
| 20847 | 0 |
| 20848 | 0 |
| 20849 | 0 |
| 20850 | 0 |
| 20851 | 0 |
| 20852 | 0 |
| 20853 | 0 |
| 20854 | 0 |
| 20855 | 0 |
| 20856 | 0 |
| 20857 | 0 |
| 20858 | 0 |
| 20859 | 0 |
| 20860 | 0 |
| 20861 | 0 |
| 20862 | 0 |
| 20863 | 0 |
| 20864 | 0 |
| 20865 | 0 |
| 20866 | 0 |
| 20867 | 0 |
| 20868 | 0 |
| 20869 | 0 |
| 20870 | 0 |
| 20871 | 0 |
| 20872 | 0 |
| 20873 | 0 |
| 20874 | 0 |
| 20875 | 0 |
| 20876 | 0 |
| 20877 | 0 |
| 20878 | 0 |
| 20879 | 0 |
| 20880 | 0 |

|       |   |
|-------|---|
| 20881 | 0 |
| 20882 | 0 |
| 20883 | 0 |
| 20884 | 0 |
| 20885 | 0 |
| 20886 | 0 |
| 20887 | 0 |
| 20888 | 0 |
| 20889 | 0 |
| 20890 | 0 |
| 20891 | 0 |
| 20892 | 0 |
| 20893 | 0 |
| 20894 | 0 |
| 20895 | 0 |
| 20896 | 0 |
| 20897 | 0 |
| 20898 | 0 |
| 20899 | 0 |
| 20900 | 0 |
| 20901 | 0 |
| 20902 | 0 |
| 20903 | 0 |
| 20904 | 0 |
| 20905 | 0 |
| 20906 | 0 |
| 20907 | 0 |
| 20908 | 0 |
| 20909 | 0 |
| 20910 | 0 |
| 20911 | 0 |
| 20912 | 0 |
| 20913 | 0 |
| 20914 | 0 |
| 20915 | 0 |
| 20916 | 0 |
| 20917 | 0 |
| 20918 | 0 |
| 20919 | 0 |
| 20920 | 0 |
| 20921 | 0 |
| 20922 | 0 |
| 20923 | 0 |
| 20924 | 0 |
| 20925 | 0 |
| 20926 | 0 |
| 20927 | 0 |
| 20928 | 0 |
| 20929 | 0 |
| 20930 | 0 |

|       |   |
|-------|---|
| 20931 | 0 |
| 20932 | 0 |
| 20933 | 0 |
| 20934 | 0 |
| 20935 | 0 |
| 20936 | 0 |
| 20937 | 0 |
| 20938 | 0 |
| 20939 | 0 |
| 20940 | 0 |
| 20941 | 0 |
| 20942 | 0 |
| 20943 | 0 |
| 20944 | 0 |
| 20945 | 0 |
| 20946 | 0 |
| 20947 | 0 |
| 20948 | 0 |
| 20949 | 0 |
| 20950 | 0 |
| 20951 | 0 |
| 20952 | 0 |
| 20953 | 0 |
| 20954 | 0 |
| 20955 | 0 |
| 20956 | 0 |
| 20957 | 0 |
| 20958 | 0 |
| 20959 | 0 |
| 20960 | 0 |
| 20961 | 0 |
| 20962 | 0 |
| 20963 | 0 |
| 20964 | 0 |
| 20965 | 0 |
| 20966 | 0 |
| 20967 | 0 |
| 20968 | 0 |
| 20969 | 0 |
| 20970 | 0 |
| 20971 | 0 |
| 20972 | 0 |
| 20973 | 0 |
| 20974 | 0 |
| 20975 | 0 |
| 20976 | 0 |
| 20977 | 0 |
| 20978 | 0 |
| 20979 | 0 |
| 20980 | 0 |

|       |   |
|-------|---|
| 20981 | 0 |
| 20982 | 0 |
| 20983 | 0 |
| 20984 | 0 |
| 20985 | 0 |
| 20986 | 0 |
| 20987 | 0 |
| 20988 | 0 |
| 20989 | 0 |
| 20990 | 0 |
| 20991 | 0 |
| 20992 | 0 |
| 20993 | 0 |
| 20994 | 0 |
| 20995 | 0 |
| 20996 | 0 |
| 20997 | 0 |
| 20998 | 0 |
| 20999 | 0 |
| 21000 | 0 |
| 21001 | 0 |
| 21002 | 0 |
| 21003 | 0 |
| 21004 | 0 |
| 21005 | 0 |
| 21006 | 0 |
| 21007 | 0 |
| 21008 | 0 |
| 21009 | 0 |
| 21010 | 0 |
| 21011 | 0 |
| 21012 | 0 |
| 21013 | 0 |
| 21014 | 0 |
| 21015 | 0 |
| 21016 | 0 |
| 21017 | 0 |
| 21018 | 0 |
| 21019 | 0 |
| 21020 | 0 |
| 21021 | 0 |
| 21022 | 0 |
| 21023 | 0 |
| 21024 | 0 |
| 21025 | 0 |
| 21026 | 0 |
| 21027 | 0 |
| 21028 | 0 |
| 21029 | 0 |
| 21030 | 0 |

|       |   |
|-------|---|
| 21031 | 0 |
| 21032 | 0 |
| 21033 | 0 |
| 21034 | 0 |
| 21035 | 0 |
| 21036 | 0 |
| 21037 | 0 |
| 21038 | 0 |
| 21039 | 0 |
| 21040 | 0 |
| 21041 | 0 |
| 21042 | 0 |
| 21043 | 0 |
| 21044 | 0 |
| 21045 | 0 |
| 21046 | 0 |
| 21047 | 0 |
| 21048 | 0 |
| 21049 | 0 |
| 21050 | 0 |
| 21051 | 0 |
| 21052 | 0 |
| 21053 | 0 |
| 21054 | 0 |
| 21055 | 0 |
| 21056 | 0 |
| 21057 | 0 |
| 21058 | 0 |
| 21059 | 0 |
| 21060 | 0 |
| 21061 | 0 |
| 21062 | 0 |
| 21063 | 0 |
| 21064 | 0 |
| 21065 | 0 |
| 21066 | 0 |
| 21067 | 0 |
| 21068 | 0 |
| 21069 | 0 |
| 21070 | 0 |
| 21071 | 0 |
| 21072 | 0 |
| 21073 | 0 |
| 21074 | 0 |
| 21075 | 0 |
| 21076 | 0 |
| 21077 | 0 |
| 21078 | 0 |
| 21079 | 0 |
| 21080 | 0 |

|       |   |
|-------|---|
| 21081 | 0 |
| 21082 | 0 |
| 21083 | 0 |
| 21084 | 0 |
| 21085 | 0 |
| 21086 | 0 |
| 21087 | 0 |
| 21088 | 0 |
| 21089 | 0 |
| 21090 | 0 |
| 21091 | 0 |
| 21092 | 0 |
| 21093 | 0 |
| 21094 | 0 |
| 21095 | 0 |
| 21096 | 0 |
| 21097 | 0 |
| 21098 | 0 |
| 21099 | 0 |
| 21100 | 0 |
| 21101 | 0 |
| 21102 | 0 |
| 21103 | 0 |
| 21104 | 0 |
| 21105 | 0 |
| 21106 | 0 |
| 21107 | 0 |
| 21108 | 0 |
| 21109 | 0 |
| 21110 | 0 |
| 21111 | 0 |
| 21112 | 0 |
| 21113 | 0 |
| 21114 | 0 |
| 21115 | 0 |
| 21116 | 0 |
| 21117 | 0 |
| 21118 | 0 |
| 21119 | 0 |
| 21120 | 0 |
| 21121 | 0 |
| 21122 | 0 |
| 21123 | 0 |
| 21124 | 0 |
| 21125 | 0 |
| 21126 | 0 |
| 21127 | 0 |
| 21128 | 0 |
| 21129 | 0 |
| 21130 | 0 |

|       |   |
|-------|---|
| 21131 | 0 |
| 21132 | 0 |
| 21133 | 0 |
| 21134 | 0 |
| 21135 | 0 |
| 21136 | 0 |
| 21137 | 0 |
| 21138 | 0 |
| 21139 | 0 |
| 21140 | 0 |
| 21141 | 0 |
| 21142 | 0 |
| 21143 | 0 |
| 21144 | 0 |
| 21145 | 0 |
| 21146 | 0 |
| 21147 | 0 |
| 21148 | 0 |
| 21149 | 0 |
| 21150 | 0 |
| 21151 | 0 |
| 21152 | 0 |
| 21153 | 0 |
| 21154 | 0 |
| 21155 | 0 |
| 21156 | 0 |
| 21157 | 0 |
| 21158 | 0 |
| 21159 | 0 |
| 21160 | 0 |
| 21161 | 0 |
| 21162 | 0 |
| 21163 | 0 |
| 21164 | 0 |
| 21165 | 0 |
| 21166 | 0 |
| 21167 | 0 |
| 21168 | 0 |
| 21169 | 0 |
| 21170 | 0 |
| 21171 | 0 |
| 21172 | 0 |
| 21173 | 0 |
| 21174 | 0 |
| 21175 | 0 |
| 21176 | 0 |
| 21177 | 0 |
| 21178 | 0 |
| 21179 | 0 |
| 21180 | 0 |



|       |   |
|-------|---|
| 21181 | 0 |
| 21182 | 0 |
| 21183 | 0 |
| 21184 | 0 |
| 21185 | 0 |
| 21186 | 0 |
| 21187 | 0 |
| 21188 | 0 |
| 21189 | 0 |
| 21190 | 0 |
| 21191 | 0 |
| 21192 | 0 |
| 21193 | 0 |
| 21194 | 0 |
| 21195 | 0 |
| 21196 | 0 |
| 21197 | 0 |
| 21198 | 0 |
| 21199 | 0 |
| 21200 | 0 |
| 21201 | 0 |
| 21202 | 0 |
| 21203 | 0 |
| 21204 | 0 |
| 21205 | 0 |
| 21206 | 0 |
| 21207 | 0 |
| 21208 | 0 |
| 21209 | 0 |
| 21210 | 0 |
| 21211 | 0 |
| 21212 | 0 |
| 21213 | 0 |
| 21214 | 0 |
| 21215 | 0 |
| 21216 | 0 |
| 21217 | 0 |
| 21218 | 0 |
| 21219 | 0 |
| 21220 | 0 |
| 21221 | 0 |
| 21222 | 0 |
| 21223 | 0 |
| 21224 | 0 |
| 21225 | 0 |
| 21226 | 0 |
| 21227 | 0 |
| 21228 | 0 |
| 21229 | 0 |
| 21230 | 0 |

|       |   |
|-------|---|
| 21231 | 0 |
| 21232 | 0 |
| 21233 | 0 |
| 21234 | 0 |
| 21235 | 0 |
| 21236 | 0 |
| 21237 | 0 |
| 21238 | 0 |
| 21239 | 0 |
| 21240 | 0 |
| 21241 | 0 |
| 21242 | 0 |
| 21243 | 0 |
| 21244 | 0 |
| 21245 | 0 |
| 21246 | 0 |
| 21247 | 0 |
| 21248 | 0 |
| 21249 | 0 |
| 21250 | 0 |
| 21251 | 0 |
| 21252 | 0 |
| 21253 | 0 |
| 21254 | 0 |
| 21255 | 0 |
| 21256 | 0 |
| 21257 | 0 |
| 21258 | 0 |
| 21259 | 0 |
| 21260 | 0 |
| 21261 | 0 |
| 21262 | 0 |
| 21263 | 0 |
| 21264 | 0 |
| 21265 | 0 |
| 21266 | 0 |
| 21267 | 0 |
| 21268 | 0 |
| 21269 | 0 |
| 21270 | 0 |
| 21271 | 0 |
| 21272 | 0 |
| 21273 | 0 |
| 21274 | 0 |
| 21275 | 0 |
| 21276 | 0 |
| 21277 | 0 |
| 21278 | 0 |
| 21279 | 0 |
| 21280 | 0 |

|       |   |
|-------|---|
| 21281 | 0 |
| 21282 | 0 |
| 21283 | 0 |
| 21284 | 0 |
| 21285 | 0 |
| 21286 | 0 |
| 21287 | 0 |
| 21288 | 0 |
| 21289 | 0 |
| 21290 | 0 |
| 21291 | 0 |
| 21292 | 0 |
| 21293 | 0 |
| 21294 | 0 |
| 21295 | 0 |
| 21296 | 0 |
| 21297 | 0 |
| 21298 | 0 |
| 21299 | 0 |
| 21300 | 0 |
| 21301 | 0 |
| 21302 | 0 |
| 21303 | 0 |
| 21304 | 0 |
| 21305 | 0 |
| 21306 | 0 |
| 21307 | 0 |
| 21308 | 0 |
| 21309 | 0 |
| 21310 | 0 |
| 21311 | 0 |
| 21312 | 0 |
| 21313 | 0 |
| 21314 | 0 |
| 21315 | 0 |
| 21316 | 0 |
| 21317 | 0 |
| 21318 | 0 |
| 21319 | 0 |
| 21320 | 0 |
| 21321 | 0 |
| 21322 | 0 |
| 21323 | 0 |
| 21324 | 0 |
| 21325 | 0 |
| 21326 | 0 |
| 21327 | 0 |
| 21328 | 0 |
| 21329 | 0 |
| 21330 | 0 |

|       |   |
|-------|---|
| 21331 | 0 |
| 21332 | 0 |
| 21333 | 0 |
| 21334 | 0 |
| 21335 | 0 |
| 21336 | 0 |
| 21337 | 0 |
| 21338 | 0 |
| 21339 | 0 |
| 21340 | 0 |
| 21341 | 0 |
| 21342 | 0 |
| 21343 | 0 |
| 21344 | 0 |
| 21345 | 0 |
| 21346 | 0 |
| 21347 | 0 |
| 21348 | 0 |
| 21349 | 0 |
| 21350 | 0 |
| 21351 | 0 |
| 21352 | 0 |
| 21353 | 0 |
| 21354 | 0 |
| 21355 | 0 |
| 21356 | 0 |
| 21357 | 0 |
| 21358 | 0 |
| 21359 | 0 |
| 21360 | 0 |
| 21361 | 0 |
| 21362 | 0 |
| 21363 | 0 |
| 21364 | 0 |
| 21365 | 0 |
| 21366 | 0 |
| 21367 | 0 |
| 21368 | 0 |
| 21369 | 0 |
| 21370 | 0 |
| 21371 | 0 |
| 21372 | 0 |
| 21373 | 0 |
| 21374 | 0 |
| 21375 | 0 |
| 21376 | 0 |
| 21377 | 0 |
| 21378 | 0 |
| 21379 | 0 |
| 21380 | 0 |

|       |   |
|-------|---|
| 21381 | 0 |
| 21382 | 0 |
| 21383 | 0 |
| 21384 | 0 |
| 21385 | 0 |
| 21386 | 0 |
| 21387 | 0 |
| 21388 | 0 |
| 21389 | 0 |
| 21390 | 0 |
| 21391 | 0 |
| 21392 | 0 |
| 21393 | 0 |
| 21394 | 0 |
| 21395 | 0 |
| 21396 | 0 |
| 21397 | 0 |
| 21398 | 0 |
| 21399 | 0 |
| 21400 | 0 |
| 21401 | 0 |
| 21402 | 0 |
| 21403 | 0 |
| 21404 | 0 |
| 21405 | 0 |
| 21406 | 0 |
| 21407 | 0 |
| 21408 | 0 |
| 21409 | 0 |
| 21410 | 0 |
| 21411 | 0 |
| 21412 | 0 |
| 21413 | 0 |
| 21414 | 0 |
| 21415 | 0 |
| 21416 | 0 |
| 21417 | 0 |
| 21418 | 0 |
| 21419 | 0 |
| 21420 | 0 |
| 21421 | 0 |
| 21422 | 0 |
| 21423 | 0 |
| 21424 | 0 |
| 21425 | 0 |
| 21426 | 0 |
| 21427 | 0 |
| 21428 | 0 |
| 21429 | 0 |
| 21430 | 0 |

|       |   |
|-------|---|
| 21431 | 0 |
| 21432 | 0 |
| 21433 | 0 |
| 21434 | 0 |
| 21435 | 0 |
| 21436 | 0 |
| 21437 | 0 |
| 21438 | 0 |
| 21439 | 0 |
| 21440 | 0 |
| 21441 | 0 |
| 21442 | 0 |
| 21443 | 0 |
| 21444 | 0 |
| 21445 | 0 |
| 21446 | 0 |
| 21447 | 0 |
| 21448 | 0 |
| 21449 | 0 |
| 21450 | 0 |
| 21451 | 0 |
| 21452 | 0 |
| 21453 | 0 |
| 21454 | 0 |
| 21455 | 0 |
| 21456 | 0 |
| 21457 | 0 |
| 21458 | 0 |
| 21459 | 0 |
| 21460 | 0 |
| 21461 | 0 |
| 21462 | 0 |
| 21463 | 0 |
| 21464 | 0 |
| 21465 | 0 |
| 21466 | 0 |
| 21467 | 0 |
| 21468 | 0 |
| 21469 | 0 |
| 21470 | 0 |
| 21471 | 0 |
| 21472 | 0 |
| 21473 | 0 |
| 21474 | 0 |
| 21475 | 0 |
| 21476 | 0 |
| 21477 | 0 |
| 21478 | 0 |
| 21479 | 0 |
| 21480 | 0 |

|       |   |
|-------|---|
| 21481 | 0 |
| 21482 | 0 |
| 21483 | 0 |
| 21484 | 0 |
| 21485 | 0 |
| 21486 | 0 |
| 21487 | 0 |
| 21488 | 0 |
| 21489 | 0 |
| 21490 | 0 |
| 21491 | 0 |
| 21492 | 0 |
| 21493 | 0 |
| 21494 | 0 |
| 21495 | 0 |
| 21496 | 0 |
| 21497 | 0 |
| 21498 | 0 |
| 21499 | 0 |
| 21500 | 0 |
| 21501 | 0 |
| 21502 | 0 |
| 21503 | 0 |
| 21504 | 0 |
| 21505 | 0 |
| 21506 | 0 |
| 21507 | 0 |
| 21508 | 0 |
| 21509 | 0 |
| 21510 | 0 |
| 21511 | 0 |
| 21512 | 0 |
| 21513 | 0 |
| 21514 | 0 |
| 21515 | 0 |
| 21516 | 0 |
| 21517 | 0 |
| 21518 | 0 |
| 21519 | 0 |
| 21520 | 0 |
| 21521 | 0 |
| 21522 | 0 |
| 21523 | 0 |
| 21524 | 0 |
| 21525 | 0 |
| 21526 | 0 |
| 21527 | 0 |
| 21528 | 0 |
| 21529 | 0 |
| 21530 | 0 |

|       |   |
|-------|---|
| 21531 | 0 |
| 21532 | 0 |
| 21533 | 0 |
| 21534 | 0 |
| 21535 | 0 |
| 21536 | 0 |
| 21537 | 0 |
| 21538 | 0 |
| 21539 | 0 |
| 21540 | 0 |
| 21541 | 0 |
| 21542 | 0 |
| 21543 | 0 |
| 21544 | 0 |
| 21545 | 0 |
| 21546 | 0 |
| 21547 | 0 |
| 21548 | 0 |
| 21549 | 0 |
| 21550 | 0 |
| 21551 | 0 |
| 21552 | 0 |
| 21553 | 0 |
| 21554 | 0 |
| 21555 | 0 |
| 21556 | 0 |
| 21557 | 0 |
| 21558 | 0 |
| 21559 | 0 |
| 21560 | 0 |
| 21561 | 0 |
| 21562 | 0 |
| 21563 | 0 |
| 21564 | 0 |
| 21565 | 0 |
| 21566 | 0 |
| 21567 | 0 |
| 21568 | 0 |
| 21569 | 0 |
| 21570 | 0 |
| 21571 | 0 |
| 21572 | 0 |
| 21573 | 0 |
| 21574 | 0 |
| 21575 | 0 |
| 21576 | 0 |
| 21577 | 0 |
| 21578 | 0 |
| 21579 | 0 |
| 21580 | 0 |



|       |   |
|-------|---|
| 21581 | 0 |
| 21582 | 0 |
| 21583 | 0 |
| 21584 | 0 |
| 21585 | 0 |
| 21586 | 0 |
| 21587 | 0 |
| 21588 | 0 |
| 21589 | 0 |
| 21590 | 0 |
| 21591 | 0 |
| 21592 | 0 |
| 21593 | 0 |
| 21594 | 0 |
| 21595 | 0 |
| 21596 | 0 |
| 21597 | 0 |
| 21598 | 0 |
| 21599 | 0 |
| 21600 | 0 |
| 21601 | 0 |
| 21602 | 0 |
| 21603 | 0 |
| 21604 | 0 |
| 21605 | 0 |
| 21606 | 0 |
| 21607 | 0 |
| 21608 | 0 |
| 21609 | 0 |
| 21610 | 0 |
| 21611 | 0 |
| 21612 | 0 |
| 21613 | 0 |
| 21614 | 0 |
| 21615 | 0 |
| 21616 | 0 |
| 21617 | 0 |
| 21618 | 0 |
| 21619 | 0 |
| 21620 | 0 |
| 21621 | 0 |
| 21622 | 0 |
| 21623 | 0 |
| 21624 | 0 |
| 21625 | 0 |
| 21626 | 0 |
| 21627 | 0 |
| 21628 | 0 |
| 21629 | 0 |
| 21630 | 0 |

|       |   |
|-------|---|
| 21631 | 0 |
| 21632 | 0 |
| 21633 | 0 |
| 21634 | 0 |
| 21635 | 0 |
| 21636 | 0 |
| 21637 | 0 |
| 21638 | 0 |
| 21639 | 0 |
| 21640 | 0 |
| 21641 | 0 |
| 21642 | 0 |
| 21643 | 0 |
| 21644 | 0 |
| 21645 | 0 |
| 21646 | 0 |
| 21647 | 0 |
| 21648 | 0 |
| 21649 | 0 |
| 21650 | 0 |
| 21651 | 0 |
| 21652 | 0 |
| 21653 | 0 |
| 21654 | 0 |
| 21655 | 0 |
| 21656 | 0 |
| 21657 | 0 |
| 21658 | 0 |
| 21659 | 0 |
| 21660 | 0 |
| 21661 | 0 |
| 21662 | 0 |
| 21663 | 0 |
| 21664 | 0 |
| 21665 | 0 |
| 21666 | 0 |
| 21667 | 0 |
| 21668 | 0 |
| 21669 | 0 |
| 21670 | 0 |
| 21671 | 0 |
| 21672 | 0 |
| 21673 | 0 |
| 21674 | 0 |
| 21675 | 0 |
| 21676 | 0 |
| 21677 | 0 |
| 21678 | 0 |
| 21679 | 0 |
| 21680 | 0 |

|       |   |
|-------|---|
| 21681 | 0 |
| 21682 | 0 |
| 21683 | 0 |
| 21684 | 0 |
| 21685 | 0 |
| 21686 | 0 |
| 21687 | 0 |
| 21688 | 0 |
| 21689 | 0 |
| 21690 | 0 |
| 21691 | 0 |
| 21692 | 0 |
| 21693 | 0 |
| 21694 | 0 |
| 21695 | 0 |
| 21696 | 0 |
| 21697 | 0 |
| 21698 | 0 |
| 21699 | 0 |
| 21700 | 0 |
| 21701 | 0 |
| 21702 | 0 |
| 21703 | 0 |
| 21704 | 0 |
| 21705 | 0 |
| 21706 | 0 |
| 21707 | 0 |
| 21708 | 0 |
| 21709 | 0 |
| 21710 | 0 |
| 21711 | 0 |
| 21712 | 0 |
| 21713 | 0 |
| 21714 | 0 |
| 21715 | 0 |
| 21716 | 0 |
| 21717 | 0 |
| 21718 | 0 |
| 21719 | 0 |
| 21720 | 0 |
| 21721 | 0 |
| 21722 | 0 |
| 21723 | 0 |
| 21724 | 0 |
| 21725 | 0 |
| 21726 | 0 |
| 21727 | 0 |
| 21728 | 0 |
| 21729 | 0 |
| 21730 | 0 |

|       |   |
|-------|---|
| 21731 | 0 |
| 21732 | 0 |
| 21733 | 0 |
| 21734 | 0 |
| 21735 | 0 |
| 21736 | 0 |
| 21737 | 0 |
| 21738 | 0 |
| 21739 | 0 |
| 21740 | 0 |
| 21741 | 0 |
| 21742 | 0 |
| 21743 | 0 |
| 21744 | 0 |
| 21745 | 0 |
| 21746 | 0 |
| 21747 | 0 |
| 21748 | 0 |
| 21749 | 0 |
| 21750 | 0 |
| 21751 | 0 |
| 21752 | 0 |
| 21753 | 0 |
| 21754 | 0 |
| 21755 | 0 |
| 21756 | 0 |
| 21757 | 0 |
| 21758 | 0 |
| 21759 | 0 |
| 21760 | 0 |
| 21761 | 0 |
| 21762 | 0 |
| 21763 | 0 |
| 21764 | 0 |
| 21765 | 0 |
| 21766 | 0 |
| 21767 | 0 |
| 21768 | 0 |
| 21769 | 0 |
| 21770 | 0 |
| 21771 | 0 |
| 21772 | 0 |
| 21773 | 0 |
| 21774 | 0 |
| 21775 | 0 |
| 21776 | 0 |
| 21777 | 0 |
| 21778 | 0 |
| 21779 | 0 |
| 21780 | 0 |

|       |   |
|-------|---|
| 21781 | 0 |
| 21782 | 0 |
| 21783 | 0 |
| 21784 | 0 |
| 21785 | 0 |
| 21786 | 0 |
| 21787 | 0 |
| 21788 | 0 |
| 21789 | 0 |
| 21790 | 0 |
| 21791 | 0 |
| 21792 | 0 |
| 21793 | 0 |
| 21794 | 0 |
| 21795 | 0 |
| 21796 | 0 |
| 21797 | 0 |
| 21798 | 0 |
| 21799 | 0 |
| 21800 | 0 |
| 21801 | 0 |
| 21802 | 0 |
| 21803 | 0 |
| 21804 | 0 |
| 21805 | 0 |
| 21806 | 0 |
| 21807 | 0 |
| 21808 | 0 |
| 21809 | 0 |
| 21810 | 0 |
| 21811 | 0 |
| 21812 | 0 |
| 21813 | 0 |
| 21814 | 0 |
| 21815 | 0 |
| 21816 | 0 |
| 21817 | 0 |
| 21818 | 0 |
| 21819 | 0 |
| 21820 | 0 |
| 21821 | 0 |
| 21822 | 0 |
| 21823 | 0 |
| 21824 | 0 |
| 21825 | 0 |
| 21826 | 0 |
| 21827 | 0 |
| 21828 | 0 |
| 21829 | 0 |
| 21830 | 0 |

|       |   |
|-------|---|
| 21831 | 0 |
| 21832 | 0 |
| 21833 | 0 |
| 21834 | 0 |
| 21835 | 0 |
| 21836 | 0 |
| 21837 | 0 |
| 21838 | 0 |
| 21839 | 0 |
| 21840 | 0 |
| 21841 | 0 |
| 21842 | 0 |
| 21843 | 0 |
| 21844 | 0 |
| 21845 | 0 |
| 21846 | 0 |
| 21847 | 0 |
| 21848 | 0 |
| 21849 | 0 |
| 21850 | 0 |
| 21851 | 0 |
| 21852 | 0 |
| 21853 | 0 |
| 21854 | 0 |
| 21855 | 0 |
| 21856 | 0 |
| 21857 | 0 |
| 21858 | 0 |
| 21859 | 0 |
| 21860 | 0 |
| 21861 | 0 |
| 21862 | 0 |
| 21863 | 0 |
| 21864 | 0 |
| 21865 | 0 |
| 21866 | 0 |
| 21867 | 0 |
| 21868 | 0 |
| 21869 | 0 |
| 21870 | 0 |
| 21871 | 0 |
| 21872 | 0 |
| 21873 | 0 |
| 21874 | 0 |
| 21875 | 0 |
| 21876 | 0 |
| 21877 | 0 |
| 21878 | 0 |
| 21879 | 0 |
| 21880 | 0 |

|       |   |
|-------|---|
| 21881 | 0 |
| 21882 | 0 |
| 21883 | 0 |
| 21884 | 0 |
| 21885 | 0 |
| 21886 | 0 |
| 21887 | 0 |
| 21888 | 0 |
| 21889 | 0 |
| 21890 | 0 |
| 21891 | 0 |
| 21892 | 0 |
| 21893 | 0 |
| 21894 | 0 |
| 21895 | 0 |
| 21896 | 0 |
| 21897 | 0 |
| 21898 | 0 |
| 21899 | 0 |
| 21900 | 0 |
| 21901 | 0 |
| 21902 | 0 |
| 21903 | 0 |
| 21904 | 0 |
| 21905 | 0 |
| 21906 | 0 |
| 21907 | 0 |
| 21908 | 0 |
| 21909 | 0 |
| 21910 | 0 |
| 21911 | 0 |
| 21912 | 0 |
| 21913 | 0 |
| 21914 | 0 |
| 21915 | 0 |
| 21916 | 0 |
| 21917 | 0 |
| 21918 | 0 |
| 21919 | 0 |
| 21920 | 0 |
| 21921 | 0 |
| 21922 | 0 |
| 21923 | 0 |
| 21924 | 0 |
| 21925 | 0 |
| 21926 | 0 |
| 21927 | 0 |
| 21928 | 0 |
| 21929 | 0 |
| 21930 | 0 |

|       |   |
|-------|---|
| 21931 | 0 |
| 21932 | 0 |
| 21933 | 0 |
| 21934 | 0 |
| 21935 | 0 |
| 21936 | 0 |
| 21937 | 0 |
| 21938 | 0 |
| 21939 | 0 |
| 21940 | 0 |
| 21941 | 0 |
| 21942 | 0 |
| 21943 | 0 |
| 21944 | 0 |
| 21945 | 0 |
| 21946 | 0 |
| 21947 | 0 |
| 21948 | 0 |
| 21949 | 0 |
| 21950 | 0 |
| 21951 | 0 |
| 21952 | 0 |
| 21953 | 0 |
| 21954 | 0 |
| 21955 | 0 |
| 21956 | 0 |
| 21957 | 0 |
| 21958 | 0 |
| 21959 | 0 |
| 21960 | 0 |
| 21961 | 0 |
| 21962 | 0 |
| 21963 | 0 |
| 21964 | 0 |
| 21965 | 0 |
| 21966 | 0 |
| 21967 | 0 |
| 21968 | 0 |
| 21969 | 0 |
| 21970 | 0 |
| 21971 | 0 |
| 21972 | 0 |
| 21973 | 0 |
| 21974 | 0 |
| 21975 | 0 |
| 21976 | 0 |
| 21977 | 0 |
| 21978 | 0 |
| 21979 | 0 |
| 21980 | 0 |



|       |   |
|-------|---|
| 21981 | 0 |
| 21982 | 0 |
| 21983 | 0 |
| 21984 | 0 |
| 21985 | 0 |
| 21986 | 0 |
| 21987 | 0 |
| 21988 | 0 |
| 21989 | 0 |
| 21990 | 0 |
| 21991 | 0 |
| 21992 | 0 |
| 21993 | 0 |
| 21994 | 0 |
| 21995 | 0 |
| 21996 | 0 |
| 21997 | 0 |
| 21998 | 0 |
| 21999 | 0 |
| 22000 | 0 |
| 22001 | 0 |
| 22002 | 0 |
| 22003 | 0 |
| 22004 | 0 |
| 22005 | 0 |
| 22006 | 0 |
| 22007 | 0 |
| 22008 | 0 |
| 22009 | 0 |
| 22010 | 0 |
| 22011 | 0 |
| 22012 | 0 |
| 22013 | 0 |
| 22014 | 0 |
| 22015 | 0 |
| 22016 | 0 |
| 22017 | 0 |
| 22018 | 0 |
| 22019 | 0 |
| 22020 | 0 |
| 22021 | 0 |
| 22022 | 0 |
| 22023 | 0 |
| 22024 | 0 |
| 22025 | 0 |
| 22026 | 0 |
| 22027 | 0 |
| 22028 | 0 |
| 22029 | 0 |
| 22030 | 0 |

|       |   |
|-------|---|
| 22031 | 0 |
| 22032 | 0 |
| 22033 | 0 |
| 22034 | 0 |
| 22035 | 0 |
| 22036 | 0 |
| 22037 | 0 |
| 22038 | 0 |
| 22039 | 0 |
| 22040 | 0 |
| 22041 | 0 |
| 22042 | 0 |
| 22043 | 0 |
| 22044 | 0 |
| 22045 | 0 |
| 22046 | 0 |
| 22047 | 0 |
| 22048 | 0 |
| 22049 | 0 |
| 22050 | 0 |
| 22051 | 0 |
| 22052 | 0 |
| 22053 | 0 |
| 22054 | 0 |
| 22055 | 0 |
| 22056 | 0 |
| 22057 | 0 |
| 22058 | 0 |
| 22059 | 0 |
| 22060 | 0 |
| 22061 | 0 |
| 22062 | 0 |
| 22063 | 0 |
| 22064 | 0 |
| 22065 | 0 |
| 22066 | 0 |
| 22067 | 0 |
| 22068 | 0 |
| 22069 | 0 |
| 22070 | 0 |
| 22071 | 0 |
| 22072 | 0 |
| 22073 | 0 |
| 22074 | 0 |
| 22075 | 0 |
| 22076 | 0 |
| 22077 | 0 |
| 22078 | 0 |
| 22079 | 0 |
| 22080 | 0 |

|       |   |
|-------|---|
| 22081 | 0 |
| 22082 | 0 |
| 22083 | 0 |
| 22084 | 0 |
| 22085 | 0 |
| 22086 | 0 |
| 22087 | 0 |
| 22088 | 0 |
| 22089 | 0 |
| 22090 | 0 |
| 22091 | 0 |
| 22092 | 0 |
| 22093 | 0 |
| 22094 | 0 |
| 22095 | 0 |
| 22096 | 0 |
| 22097 | 0 |
| 22098 | 0 |
| 22099 | 0 |
| 22100 | 0 |
| 22101 | 0 |
| 22102 | 0 |
| 22103 | 0 |
| 22104 | 0 |
| 22105 | 0 |
| 22106 | 0 |
| 22107 | 0 |
| 22108 | 0 |
| 22109 | 0 |
| 22110 | 0 |
| 22111 | 0 |
| 22112 | 0 |
| 22113 | 0 |
| 22114 | 0 |
| 22115 | 0 |
| 22116 | 0 |
| 22117 | 0 |
| 22118 | 0 |
| 22119 | 0 |
| 22120 | 0 |
| 22121 | 0 |
| 22122 | 0 |
| 22123 | 0 |
| 22124 | 0 |
| 22125 | 0 |
| 22126 | 0 |
| 22127 | 0 |
| 22128 | 0 |
| 22129 | 0 |
| 22130 | 0 |

|       |   |
|-------|---|
| 22131 | 0 |
| 22132 | 0 |
| 22133 | 0 |
| 22134 | 0 |
| 22135 | 0 |
| 22136 | 0 |
| 22137 | 0 |
| 22138 | 0 |
| 22139 | 0 |
| 22140 | 0 |
| 22141 | 0 |
| 22142 | 0 |
| 22143 | 0 |
| 22144 | 0 |
| 22145 | 0 |
| 22146 | 0 |
| 22147 | 0 |
| 22148 | 0 |
| 22149 | 0 |
| 22150 | 0 |
| 22151 | 0 |
| 22152 | 0 |
| 22153 | 0 |
| 22154 | 0 |
| 22155 | 0 |
| 22156 | 0 |
| 22157 | 0 |
| 22158 | 0 |
| 22159 | 0 |
| 22160 | 0 |
| 22161 | 0 |
| 22162 | 0 |
| 22163 | 0 |
| 22164 | 0 |
| 22165 | 0 |
| 22166 | 0 |
| 22167 | 0 |
| 22168 | 0 |
| 22169 | 0 |
| 22170 | 0 |
| 22171 | 0 |
| 22172 | 0 |
| 22173 | 0 |
| 22174 | 0 |
| 22175 | 0 |
| 22176 | 0 |
| 22177 | 0 |
| 22178 | 0 |
| 22179 | 0 |
| 22180 | 0 |

|       |   |
|-------|---|
| 22181 | 0 |
| 22182 | 0 |
| 22183 | 0 |
| 22184 | 0 |
| 22185 | 0 |
| 22186 | 0 |
| 22187 | 0 |
| 22188 | 0 |
| 22189 | 0 |
| 22190 | 0 |
| 22191 | 0 |
| 22192 | 0 |
| 22193 | 0 |
| 22194 | 0 |
| 22195 | 0 |
| 22196 | 0 |
| 22197 | 0 |
| 22198 | 0 |
| 22199 | 0 |
| 22200 | 0 |
| 22201 | 0 |
| 22202 | 0 |
| 22203 | 0 |
| 22204 | 0 |
| 22205 | 0 |
| 22206 | 0 |
| 22207 | 0 |
| 22208 | 0 |
| 22209 | 0 |
| 22210 | 0 |
| 22211 | 0 |
| 22212 | 0 |
| 22213 | 0 |
| 22214 | 0 |
| 22215 | 0 |
| 22216 | 0 |
| 22217 | 0 |
| 22218 | 0 |
| 22219 | 0 |
| 22220 | 0 |
| 22221 | 0 |
| 22222 | 0 |
| 22223 | 0 |
| 22224 | 0 |
| 22225 | 0 |
| 22226 | 0 |
| 22227 | 0 |
| 22228 | 0 |
| 22229 | 0 |
| 22230 | 0 |

|       |   |
|-------|---|
| 22231 | 0 |
| 22232 | 0 |
| 22233 | 0 |
| 22234 | 0 |
| 22235 | 0 |
| 22236 | 0 |
| 22237 | 0 |
| 22238 | 0 |
| 22239 | 0 |
| 22240 | 0 |
| 22241 | 0 |
| 22242 | 0 |
| 22243 | 0 |
| 22244 | 0 |
| 22245 | 0 |
| 22246 | 0 |
| 22247 | 0 |
| 22248 | 0 |
| 22249 | 0 |
| 22250 | 0 |
| 22251 | 0 |
| 22252 | 0 |
| 22253 | 0 |
| 22254 | 0 |
| 22255 | 0 |
| 22256 | 0 |
| 22257 | 0 |
| 22258 | 0 |
| 22259 | 0 |
| 22260 | 0 |
| 22261 | 0 |
| 22262 | 0 |
| 22263 | 0 |
| 22264 | 0 |
| 22265 | 0 |
| 22266 | 0 |
| 22267 | 0 |
| 22268 | 0 |
| 22269 | 0 |
| 22270 | 0 |
| 22271 | 0 |
| 22272 | 0 |
| 22273 | 0 |
| 22274 | 0 |
| 22275 | 0 |
| 22276 | 0 |
| 22277 | 0 |
| 22278 | 0 |
| 22279 | 0 |
| 22280 | 0 |

|       |   |
|-------|---|
| 22281 | 0 |
| 22282 | 0 |
| 22283 | 0 |
| 22284 | 0 |
| 22285 | 0 |
| 22286 | 0 |
| 22287 | 0 |
| 22288 | 0 |
| 22289 | 0 |
| 22290 | 0 |
| 22291 | 0 |
| 22292 | 0 |
| 22293 | 0 |
| 22294 | 0 |
| 22295 | 0 |
| 22296 | 0 |
| 22297 | 0 |
| 22298 | 0 |
| 22299 | 0 |
| 22300 | 0 |
| 22301 | 0 |
| 22302 | 0 |
| 22303 | 0 |
| 22304 | 0 |
| 22305 | 0 |
| 22306 | 0 |
| 22307 | 0 |
| 22308 | 0 |
| 22309 | 0 |
| 22310 | 0 |
| 22311 | 0 |
| 22312 | 0 |
| 22313 | 0 |
| 22314 | 0 |
| 22315 | 0 |
| 22316 | 0 |
| 22317 | 0 |
| 22318 | 0 |
| 22319 | 0 |
| 22320 | 0 |
| 22321 | 0 |
| 22322 | 0 |
| 22323 | 0 |
| 22324 | 0 |
| 22325 | 0 |
| 22326 | 0 |
| 22327 | 0 |
| 22328 | 0 |
| 22329 | 0 |
| 22330 | 0 |

|       |   |
|-------|---|
| 22331 | 0 |
| 22332 | 0 |
| 22333 | 0 |
| 22334 | 0 |
| 22335 | 0 |
| 22336 | 0 |
| 22337 | 0 |
| 22338 | 0 |
| 22339 | 0 |
| 22340 | 0 |
| 22341 | 0 |
| 22342 | 0 |
| 22343 | 0 |
| 22344 | 0 |
| 22345 | 0 |
| 22346 | 0 |
| 22347 | 0 |
| 22348 | 0 |
| 22349 | 0 |
| 22350 | 0 |
| 22351 | 0 |
| 22352 | 0 |
| 22353 | 0 |
| 22354 | 0 |
| 22355 | 0 |
| 22356 | 0 |
| 22357 | 0 |
| 22358 | 0 |
| 22359 | 0 |
| 22360 | 0 |
| 22361 | 0 |
| 22362 | 0 |
| 22363 | 0 |
| 22364 | 0 |
| 22365 | 0 |
| 22366 | 0 |
| 22367 | 0 |
| 22368 | 0 |
| 22369 | 0 |
| 22370 | 0 |
| 22371 | 0 |
| 22372 | 0 |
| 22373 | 0 |
| 22374 | 0 |
| 22375 | 0 |
| 22376 | 0 |
| 22377 | 0 |
| 22378 | 0 |
| 22379 | 0 |
| 22380 | 0 |



|       |   |
|-------|---|
| 22381 | 0 |
| 22382 | 0 |
| 22383 | 0 |
| 22384 | 0 |
| 22385 | 0 |
| 22386 | 0 |
| 22387 | 0 |
| 22388 | 0 |
| 22389 | 0 |
| 22390 | 0 |
| 22391 | 0 |
| 22392 | 0 |
| 22393 | 0 |
| 22394 | 0 |
| 22395 | 0 |
| 22396 | 0 |
| 22397 | 0 |
| 22398 | 0 |
| 22399 | 0 |
| 22400 | 0 |
| 22401 | 0 |
| 22402 | 0 |
| 22403 | 0 |
| 22404 | 0 |
| 22405 | 0 |
| 22406 | 0 |
| 22407 | 0 |
| 22408 | 0 |
| 22409 | 0 |
| 22410 | 0 |
| 22411 | 0 |
| 22412 | 0 |
| 22413 | 0 |
| 22414 | 0 |
| 22415 | 0 |
| 22416 | 0 |
| 22417 | 0 |
| 22418 | 0 |
| 22419 | 0 |
| 22420 | 0 |
| 22421 | 0 |
| 22422 | 0 |
| 22423 | 0 |
| 22424 | 0 |
| 22425 | 0 |
| 22426 | 0 |
| 22427 | 0 |
| 22428 | 0 |
| 22429 | 0 |
| 22430 | 0 |

|       |   |
|-------|---|
| 22431 | 0 |
| 22432 | 0 |
| 22433 | 0 |
| 22434 | 0 |
| 22435 | 0 |
| 22436 | 0 |
| 22437 | 0 |
| 22438 | 0 |
| 22439 | 0 |
| 22440 | 0 |
| 22441 | 0 |
| 22442 | 0 |
| 22443 | 0 |
| 22444 | 0 |
| 22445 | 0 |
| 22446 | 0 |
| 22447 | 0 |
| 22448 | 0 |
| 22449 | 0 |
| 22450 | 0 |
| 22451 | 0 |
| 22452 | 0 |
| 22453 | 0 |
| 22454 | 0 |
| 22455 | 0 |
| 22456 | 0 |
| 22457 | 0 |
| 22458 | 0 |
| 22459 | 0 |
| 22460 | 0 |
| 22461 | 0 |
| 22462 | 0 |
| 22463 | 0 |
| 22464 | 0 |
| 22465 | 0 |
| 22466 | 0 |
| 22467 | 0 |
| 22468 | 0 |
| 22469 | 0 |
| 22470 | 0 |
| 22471 | 0 |
| 22472 | 0 |
| 22473 | 0 |
| 22474 | 0 |
| 22475 | 0 |
| 22476 | 0 |
| 22477 | 0 |
| 22478 | 0 |
| 22479 | 0 |
| 22480 | 0 |

|       |   |
|-------|---|
| 22481 | 0 |
| 22482 | 0 |
| 22483 | 0 |
| 22484 | 0 |
| 22485 | 0 |
| 22486 | 0 |
| 22487 | 0 |
| 22488 | 0 |
| 22489 | 0 |
| 22490 | 0 |
| 22491 | 0 |
| 22492 | 0 |
| 22493 | 0 |
| 22494 | 0 |
| 22495 | 0 |
| 22496 | 0 |
| 22497 | 0 |
| 22498 | 0 |
| 22499 | 0 |
| 22500 | 0 |
| 22501 | 0 |
| 22502 | 0 |
| 22503 | 0 |
| 22504 | 0 |
| 22505 | 0 |
| 22506 | 0 |
| 22507 | 0 |
| 22508 | 0 |
| 22509 | 0 |
| 22510 | 0 |
| 22511 | 0 |
| 22512 | 0 |
| 22513 | 0 |
| 22514 | 0 |
| 22515 | 0 |
| 22516 | 0 |
| 22517 | 0 |
| 22518 | 0 |
| 22519 | 0 |
| 22520 | 0 |
| 22521 | 0 |
| 22522 | 0 |
| 22523 | 0 |
| 22524 | 0 |
| 22525 | 0 |
| 22526 | 0 |
| 22527 | 0 |
| 22528 | 0 |
| 22529 | 0 |
| 22530 | 0 |

|       |   |
|-------|---|
| 22531 | 0 |
| 22532 | 0 |
| 22533 | 0 |
| 22534 | 0 |
| 22535 | 0 |
| 22536 | 0 |
| 22537 | 0 |
| 22538 | 0 |
| 22539 | 0 |
| 22540 | 0 |
| 22541 | 0 |
| 22542 | 0 |
| 22543 | 0 |
| 22544 | 0 |
| 22545 | 0 |
| 22546 | 0 |
| 22547 | 0 |
| 22548 | 0 |
| 22549 | 0 |
| 22550 | 0 |
| 22551 | 0 |
| 22552 | 0 |
| 22553 | 0 |
| 22554 | 0 |
| 22555 | 0 |
| 22556 | 0 |
| 22557 | 0 |
| 22558 | 0 |
| 22559 | 0 |
| 22560 | 0 |
| 22561 | 0 |
| 22562 | 0 |
| 22563 | 0 |
| 22564 | 0 |
| 22565 | 0 |
| 22566 | 0 |
| 22567 | 0 |
| 22568 | 0 |
| 22569 | 0 |
| 22570 | 0 |
| 22571 | 0 |
| 22572 | 0 |
| 22573 | 0 |
| 22574 | 0 |
| 22575 | 0 |
| 22576 | 0 |
| 22577 | 0 |
| 22578 | 0 |
| 22579 | 0 |
| 22580 | 0 |

|       |   |
|-------|---|
| 22581 | 0 |
| 22582 | 0 |
| 22583 | 0 |
| 22584 | 0 |
| 22585 | 0 |
| 22586 | 0 |
| 22587 | 0 |
| 22588 | 0 |
| 22589 | 0 |
| 22590 | 0 |
| 22591 | 0 |
| 22592 | 0 |
| 22593 | 0 |
| 22594 | 0 |
| 22595 | 0 |
| 22596 | 0 |
| 22597 | 0 |
| 22598 | 0 |
| 22599 | 0 |
| 22600 | 0 |
| 22601 | 0 |
| 22602 | 0 |
| 22603 | 0 |
| 22604 | 0 |
| 22605 | 0 |
| 22606 | 0 |
| 22607 | 0 |
| 22608 | 0 |
| 22609 | 0 |
| 22610 | 0 |
| 22611 | 0 |
| 22612 | 0 |
| 22613 | 0 |
| 22614 | 0 |
| 22615 | 0 |
| 22616 | 0 |
| 22617 | 0 |
| 22618 | 0 |
| 22619 | 0 |
| 22620 | 0 |
| 22621 | 0 |
| 22622 | 0 |
| 22623 | 0 |
| 22624 | 0 |
| 22625 | 0 |
| 22626 | 0 |
| 22627 | 0 |
| 22628 | 0 |
| 22629 | 0 |
| 22630 | 0 |

|       |   |
|-------|---|
| 22631 | 0 |
| 22632 | 0 |
| 22633 | 0 |
| 22634 | 0 |
| 22635 | 0 |
| 22636 | 0 |
| 22637 | 0 |
| 22638 | 0 |
| 22639 | 0 |
| 22640 | 0 |
| 22641 | 0 |
| 22642 | 0 |
| 22643 | 0 |
| 22644 | 0 |
| 22645 | 0 |
| 22646 | 0 |
| 22647 | 0 |
| 22648 | 0 |
| 22649 | 0 |
| 22650 | 0 |
| 22651 | 0 |
| 22652 | 0 |
| 22653 | 0 |
| 22654 | 0 |
| 22655 | 0 |
| 22656 | 0 |
| 22657 | 0 |
| 22658 | 0 |
| 22659 | 0 |
| 22660 | 0 |
| 22661 | 0 |
| 22662 | 0 |
| 22663 | 0 |
| 22664 | 0 |
| 22665 | 0 |
| 22666 | 0 |
| 22667 | 0 |
| 22668 | 0 |
| 22669 | 0 |
| 22670 | 0 |
| 22671 | 0 |
| 22672 | 0 |
| 22673 | 0 |
| 22674 | 0 |
| 22675 | 0 |
| 22676 | 0 |
| 22677 | 0 |
| 22678 | 0 |
| 22679 | 0 |
| 22680 | 0 |

|       |   |
|-------|---|
| 22681 | 0 |
| 22682 | 0 |
| 22683 | 0 |
| 22684 | 0 |
| 22685 | 0 |
| 22686 | 0 |
| 22687 | 0 |
| 22688 | 0 |
| 22689 | 0 |
| 22690 | 0 |
| 22691 | 0 |
| 22692 | 0 |
| 22693 | 0 |
| 22694 | 0 |
| 22695 | 0 |
| 22696 | 0 |
| 22697 | 0 |
| 22698 | 0 |
| 22699 | 0 |
| 22700 | 0 |
| 22701 | 0 |
| 22702 | 0 |
| 22703 | 0 |
| 22704 | 0 |
| 22705 | 0 |
| 22706 | 0 |
| 22707 | 0 |
| 22708 | 0 |
| 22709 | 0 |
| 22710 | 0 |
| 22711 | 0 |
| 22712 | 0 |
| 22713 | 0 |
| 22714 | 0 |
| 22715 | 0 |
| 22716 | 0 |
| 22717 | 0 |
| 22718 | 0 |
| 22719 | 0 |
| 22720 | 0 |
| 22721 | 0 |
| 22722 | 0 |
| 22723 | 0 |
| 22724 | 0 |
| 22725 | 0 |
| 22726 | 0 |
| 22727 | 0 |
| 22728 | 0 |
| 22729 | 0 |
| 22730 | 0 |

|       |   |
|-------|---|
| 22731 | 0 |
| 22732 | 0 |
| 22733 | 0 |
| 22734 | 0 |
| 22735 | 0 |
| 22736 | 0 |
| 22737 | 0 |
| 22738 | 0 |
| 22739 | 0 |
| 22740 | 0 |
| 22741 | 0 |
| 22742 | 0 |
| 22743 | 0 |
| 22744 | 0 |
| 22745 | 0 |
| 22746 | 0 |
| 22747 | 0 |
| 22748 | 0 |
| 22749 | 0 |
| 22750 | 0 |
| 22751 | 0 |
| 22752 | 0 |
| 22753 | 0 |
| 22754 | 0 |
| 22755 | 0 |
| 22756 | 0 |
| 22757 | 0 |
| 22758 | 0 |
| 22759 | 0 |
| 22760 | 0 |
| 22761 | 0 |
| 22762 | 0 |
| 22763 | 0 |
| 22764 | 0 |
| 22765 | 0 |
| 22766 | 0 |
| 22767 | 0 |
| 22768 | 0 |
| 22769 | 0 |
| 22770 | 0 |
| 22771 | 0 |
| 22772 | 0 |
| 22773 | 0 |
| 22774 | 0 |
| 22775 | 0 |
| 22776 | 0 |
| 22777 | 0 |
| 22778 | 0 |
| 22779 | 0 |
| 22780 | 0 |



|       |   |
|-------|---|
| 22781 | 0 |
| 22782 | 0 |
| 22783 | 0 |
| 22784 | 0 |
| 22785 | 0 |
| 22786 | 0 |
| 22787 | 0 |
| 22788 | 0 |
| 22789 | 0 |
| 22790 | 0 |
| 22791 | 0 |
| 22792 | 0 |
| 22793 | 0 |
| 22794 | 0 |
| 22795 | 0 |
| 22796 | 0 |
| 22797 | 0 |
| 22798 | 0 |
| 22799 | 0 |
| 22800 | 0 |
| 22801 | 0 |
| 22802 | 0 |
| 22803 | 0 |
| 22804 | 0 |
| 22805 | 0 |
| 22806 | 0 |
| 22807 | 0 |
| 22808 | 0 |
| 22809 | 0 |
| 22810 | 0 |
| 22811 | 0 |
| 22812 | 0 |
| 22813 | 0 |
| 22814 | 0 |
| 22815 | 0 |
| 22816 | 0 |
| 22817 | 0 |
| 22818 | 0 |
| 22819 | 0 |
| 22820 | 0 |
| 22821 | 0 |
| 22822 | 0 |
| 22823 | 0 |
| 22824 | 0 |
| 22825 | 0 |
| 22826 | 0 |
| 22827 | 0 |
| 22828 | 0 |
| 22829 | 0 |
| 22830 | 0 |

|       |   |
|-------|---|
| 22831 | 0 |
| 22832 | 0 |
| 22833 | 0 |
| 22834 | 0 |
| 22835 | 0 |
| 22836 | 0 |
| 22837 | 0 |
| 22838 | 0 |
| 22839 | 0 |
| 22840 | 0 |
| 22841 | 0 |
| 22842 | 0 |
| 22843 | 0 |
| 22844 | 0 |
| 22845 | 0 |
| 22846 | 0 |
| 22847 | 0 |
| 22848 | 0 |
| 22849 | 0 |
| 22850 | 0 |
| 22851 | 0 |
| 22852 | 0 |
| 22853 | 0 |
| 22854 | 0 |
| 22855 | 0 |
| 22856 | 0 |
| 22857 | 0 |
| 22858 | 0 |
| 22859 | 0 |
| 22860 | 0 |
| 22861 | 0 |
| 22862 | 0 |
| 22863 | 0 |
| 22864 | 0 |
| 22865 | 0 |
| 22866 | 0 |
| 22867 | 0 |
| 22868 | 0 |
| 22869 | 0 |
| 22870 | 0 |
| 22871 | 0 |
| 22872 | 0 |
| 22873 | 0 |
| 22874 | 0 |
| 22875 | 0 |
| 22876 | 0 |
| 22877 | 0 |
| 22878 | 0 |
| 22879 | 0 |
| 22880 | 0 |

|       |   |
|-------|---|
| 22881 | 0 |
| 22882 | 0 |
| 22883 | 0 |
| 22884 | 0 |
| 22885 | 0 |
| 22886 | 0 |
| 22887 | 0 |
| 22888 | 0 |
| 22889 | 0 |
| 22890 | 0 |
| 22891 | 0 |
| 22892 | 0 |
| 22893 | 0 |
| 22894 | 0 |
| 22895 | 0 |
| 22896 | 0 |
| 22897 | 0 |
| 22898 | 0 |
| 22899 | 0 |
| 22900 | 0 |
| 22901 | 0 |
| 22902 | 0 |
| 22903 | 0 |
| 22904 | 0 |
| 22905 | 0 |
| 22906 | 0 |
| 22907 | 0 |
| 22908 | 0 |
| 22909 | 0 |
| 22910 | 0 |
| 22911 | 0 |
| 22912 | 0 |
| 22913 | 0 |
| 22914 | 0 |
| 22915 | 0 |
| 22916 | 0 |
| 22917 | 0 |
| 22918 | 0 |
| 22919 | 0 |
| 22920 | 0 |
| 22921 | 0 |
| 22922 | 0 |
| 22923 | 0 |
| 22924 | 0 |
| 22925 | 0 |
| 22926 | 0 |
| 22927 | 0 |
| 22928 | 0 |
| 22929 | 0 |
| 22930 | 0 |

|       |   |
|-------|---|
| 22931 | 0 |
| 22932 | 0 |
| 22933 | 0 |
| 22934 | 0 |
| 22935 | 0 |
| 22936 | 0 |
| 22937 | 0 |
| 22938 | 0 |
| 22939 | 0 |
| 22940 | 0 |
| 22941 | 0 |
| 22942 | 0 |
| 22943 | 0 |
| 22944 | 0 |
| 22945 | 0 |
| 22946 | 0 |
| 22947 | 0 |
| 22948 | 0 |
| 22949 | 0 |
| 22950 | 0 |
| 22951 | 0 |
| 22952 | 0 |
| 22953 | 0 |
| 22954 | 0 |
| 22955 | 0 |
| 22956 | 0 |
| 22957 | 0 |
| 22958 | 0 |
| 22959 | 0 |
| 22960 | 0 |
| 22961 | 0 |
| 22962 | 0 |
| 22963 | 0 |
| 22964 | 0 |
| 22965 | 0 |
| 22966 | 0 |
| 22967 | 0 |
| 22968 | 0 |
| 22969 | 0 |
| 22970 | 0 |
| 22971 | 0 |
| 22972 | 0 |
| 22973 | 0 |
| 22974 | 0 |
| 22975 | 0 |
| 22976 | 0 |
| 22977 | 0 |
| 22978 | 0 |
| 22979 | 0 |
| 22980 | 0 |

|       |   |
|-------|---|
| 22981 | 0 |
| 22982 | 0 |
| 22983 | 0 |
| 22984 | 0 |
| 22985 | 0 |
| 22986 | 0 |
| 22987 | 0 |
| 22988 | 0 |
| 22989 | 0 |
| 22990 | 0 |
| 22991 | 0 |
| 22992 | 0 |
| 22993 | 0 |
| 22994 | 0 |
| 22995 | 0 |
| 22996 | 0 |
| 22997 | 0 |
| 22998 | 0 |
| 22999 | 0 |
| 23000 | 0 |
| 23001 | 0 |
| 23002 | 0 |
| 23003 | 0 |
| 23004 | 0 |
| 23005 | 0 |
| 23006 | 0 |
| 23007 | 0 |
| 23008 | 0 |
| 23009 | 0 |
| 23010 | 0 |
| 23011 | 0 |
| 23012 | 0 |
| 23013 | 0 |
| 23014 | 0 |
| 23015 | 0 |
| 23016 | 0 |
| 23017 | 0 |
| 23018 | 0 |
| 23019 | 0 |
| 23020 | 0 |
| 23021 | 0 |
| 23022 | 0 |
| 23023 | 0 |
| 23024 | 0 |
| 23025 | 0 |
| 23026 | 0 |
| 23027 | 0 |
| 23028 | 0 |
| 23029 | 0 |
| 23030 | 0 |

|       |   |
|-------|---|
| 23031 | 0 |
| 23032 | 0 |
| 23033 | 0 |
| 23034 | 0 |
| 23035 | 0 |
| 23036 | 0 |
| 23037 | 0 |
| 23038 | 0 |
| 23039 | 0 |
| 23040 | 0 |
| 23041 | 0 |
| 23042 | 0 |
| 23043 | 0 |
| 23044 | 0 |
| 23045 | 0 |
| 23046 | 0 |
| 23047 | 0 |
| 23048 | 0 |
| 23049 | 0 |
| 23050 | 0 |
| 23051 | 0 |
| 23052 | 0 |
| 23053 | 0 |
| 23054 | 0 |
| 23055 | 0 |
| 23056 | 0 |
| 23057 | 0 |
| 23058 | 0 |
| 23059 | 0 |
| 23060 | 0 |
| 23061 | 0 |
| 23062 | 0 |
| 23063 | 0 |
| 23064 | 0 |
| 23065 | 0 |
| 23066 | 0 |
| 23067 | 0 |
| 23068 | 0 |
| 23069 | 0 |
| 23070 | 0 |
| 23071 | 0 |
| 23072 | 0 |
| 23073 | 0 |
| 23074 | 0 |
| 23075 | 0 |
| 23076 | 0 |
| 23077 | 0 |
| 23078 | 0 |
| 23079 | 0 |
| 23080 | 0 |

|       |   |
|-------|---|
| 23081 | 0 |
| 23082 | 0 |
| 23084 | 0 |
| 23085 | 0 |
| 23086 | 0 |
| 23087 | 0 |
| 23088 | 0 |
| 23089 | 0 |
| 23090 | 0 |
| 23091 | 0 |
| 23092 | 0 |
| 23093 | 0 |
| 23094 | 0 |
| 23095 | 0 |
| 23096 | 0 |
| 23097 | 0 |
| 23098 | 0 |
| 23099 | 0 |
| 23100 | 0 |
| 23101 | 0 |
| 23102 | 0 |
| 23103 | 0 |
| 23104 | 0 |
| 23105 | 0 |
| 23106 | 0 |
| 23107 | 0 |
| 23108 | 0 |
| 23109 | 0 |
| 23110 | 0 |
| 23111 | 0 |
| 23112 | 0 |
| 23113 | 0 |
| 23114 | 0 |
| 23115 | 0 |
| 23116 | 0 |
| 23117 | 0 |
| 23118 | 0 |
| 23119 | 0 |
| 23120 | 0 |
| 23121 | 0 |
| 23122 | 0 |
| 23123 | 0 |
| 23124 | 0 |
| 23125 | 0 |
| 23126 | 0 |
| 23127 | 0 |
| 23128 | 0 |
| 23129 | 0 |
| 23130 | 0 |
| 23131 | 0 |

|       |   |
|-------|---|
| 23132 | 0 |
| 23133 | 0 |
| 23134 | 0 |
| 23135 | 0 |
| 23136 | 0 |
| 23137 | 0 |
| 23138 | 0 |
| 23139 | 0 |
| 23140 | 0 |
| 23141 | 0 |
| 23142 | 0 |
| 23143 | 0 |
| 23144 | 0 |
| 23145 | 0 |
| 23146 | 0 |
| 23147 | 0 |
| 23148 | 0 |
| 23149 | 0 |
| 23150 | 0 |
| 23151 | 0 |
| 23152 | 0 |
| 23153 | 0 |
| 23154 | 0 |
| 23155 | 0 |
| 23156 | 0 |
| 23157 | 0 |
| 23158 | 0 |
| 23159 | 0 |
| 23160 | 0 |
| 23161 | 0 |
| 23162 | 0 |
| 23163 | 0 |
| 23164 | 0 |
| 23165 | 0 |
| 23166 | 0 |
| 23167 | 0 |
| 23168 | 0 |
| 23169 | 0 |
| 23170 | 0 |
| 23171 | 0 |
| 23172 | 0 |
| 23173 | 0 |
| 23174 | 0 |
| 23175 | 0 |
| 23176 | 0 |
| 23177 | 0 |
| 23178 | 0 |
| 23179 | 0 |
| 23180 | 0 |
| 23181 | 0 |



|       |   |
|-------|---|
| 23182 | 0 |
| 23183 | 0 |
| 23184 | 0 |
| 23185 | 0 |
| 23186 | 0 |
| 23187 | 0 |
| 23188 | 0 |
| 23189 | 0 |
| 23190 | 0 |
| 23191 | 0 |
| 23192 | 0 |
| 23193 | 0 |
| 23194 | 0 |
| 23195 | 0 |
| 23196 | 0 |
| 23197 | 0 |
| 23198 | 0 |
| 23199 | 0 |
| 23200 | 0 |
| 23201 | 0 |
| 23202 | 0 |
| 23203 | 0 |
| 23204 | 0 |
| 23205 | 0 |
| 23206 | 0 |
| 23207 | 0 |
| 23208 | 0 |
| 23209 | 0 |
| 23210 | 0 |
| 23211 | 0 |
| 23212 | 0 |
| 23213 | 0 |
| 23214 | 0 |
| 23215 | 0 |
| 23216 | 0 |
| 23217 | 0 |
| 23218 | 0 |
| 23219 | 0 |
| 23220 | 0 |
| 23221 | 0 |
| 23222 | 0 |
| 23223 | 0 |
| 23224 | 0 |
| 23225 | 0 |
| 23226 | 0 |
| 23227 | 0 |
| 23228 | 0 |
| 23229 | 0 |
| 23230 | 0 |
| 23231 | 0 |

|       |   |
|-------|---|
| 23232 | 0 |
| 23233 | 0 |
| 23234 | 0 |
| 23235 | 0 |
| 23236 | 0 |
| 23237 | 0 |
| 23238 | 0 |
| 23239 | 0 |
| 23240 | 0 |
| 23241 | 0 |
| 23242 | 0 |
| 23243 | 0 |
| 23244 | 0 |
| 23245 | 0 |
| 23246 | 0 |
| 23247 | 0 |
| 23248 | 0 |
| 23249 | 0 |
| 23250 | 0 |
| 23251 | 0 |
| 23252 | 0 |
| 23253 | 0 |
| 23254 | 0 |
| 23255 | 0 |
| 23256 | 0 |
| 23257 | 0 |
| 23258 | 0 |
| 23259 | 0 |
| 23260 | 0 |
| 23261 | 0 |
| 23262 | 0 |
| 23263 | 0 |
| 23264 | 0 |
| 23265 | 0 |
| 23266 | 0 |
| 23267 | 0 |
| 23268 | 0 |
| 23269 | 0 |
| 23270 | 0 |
| 23271 | 0 |
| 23272 | 0 |
| 23273 | 0 |
| 23274 | 0 |
| 23275 | 0 |
| 23276 | 0 |
| 23277 | 0 |
| 23278 | 0 |
| 23279 | 0 |
| 23280 | 0 |
| 23281 | 0 |

|       |   |
|-------|---|
| 23282 | 0 |
| 23283 | 0 |
| 23284 | 0 |
| 23285 | 0 |
| 23286 | 0 |
| 23287 | 0 |
| 23288 | 0 |
| 23289 | 0 |
| 23290 | 0 |
| 23291 | 0 |
| 23292 | 0 |
| 23293 | 0 |
| 23294 | 0 |
| 23295 | 0 |
| 23296 | 0 |
| 23297 | 0 |
| 23298 | 0 |
| 23299 | 0 |
| 23300 | 0 |
| 23301 | 0 |
| 23302 | 0 |
| 23303 | 0 |
| 23304 | 0 |
| 23305 | 0 |
| 23306 | 0 |
| 23307 | 0 |
| 23308 | 0 |
| 23309 | 0 |
| 23310 | 0 |
| 23311 | 0 |
| 23312 | 0 |
| 23313 | 0 |
| 23314 | 0 |
| 23315 | 0 |
| 23316 | 0 |
| 23317 | 0 |
| 23318 | 0 |
| 23319 | 0 |
| 23320 | 0 |
| 23321 | 0 |
| 23322 | 0 |
| 23323 | 0 |
| 23324 | 0 |
| 23325 | 0 |
| 23326 | 0 |
| 23327 | 0 |
| 23328 | 0 |
| 23329 | 0 |
| 23330 | 0 |
| 23331 | 0 |

|       |   |
|-------|---|
| 23332 | 0 |
| 23333 | 0 |
| 23334 | 0 |
| 23335 | 0 |
| 23336 | 0 |
| 23337 | 0 |
| 23338 | 0 |
| 23339 | 0 |
| 23340 | 0 |
| 23341 | 0 |
| 23342 | 0 |
| 23343 | 0 |
| 23344 | 0 |
| 23345 | 0 |
| 23346 | 0 |
| 23347 | 0 |
| 23348 | 0 |
| 23349 | 0 |
| 23350 | 0 |
| 23351 | 0 |
| 23352 | 0 |
| 23353 | 0 |
| 23354 | 0 |
| 23355 | 0 |
| 23356 | 0 |
| 23357 | 0 |
| 23358 | 0 |
| 23359 | 0 |
| 23360 | 0 |
| 23361 | 0 |
| 23362 | 0 |
| 23363 | 0 |
| 23364 | 0 |
| 23365 | 0 |
| 23366 | 0 |
| 23367 | 0 |
| 23368 | 0 |
| 23369 | 0 |
| 23370 | 0 |
| 23371 | 0 |
| 23372 | 0 |
| 23373 | 0 |
| 23374 | 0 |
| 23375 | 0 |
| 23376 | 0 |
| 23377 | 0 |
| 23378 | 0 |
| 23379 | 0 |
| 23380 | 0 |
| 23381 | 0 |

|       |   |
|-------|---|
| 23382 | 0 |
| 23383 | 0 |
| 23384 | 0 |
| 23385 | 0 |
| 23386 | 0 |
| 23387 | 0 |
| 23388 | 0 |
| 23389 | 0 |
| 23390 | 0 |
| 23391 | 0 |
| 23392 | 0 |
| 23393 | 0 |
| 23394 | 0 |
| 23395 | 0 |
| 23396 | 0 |
| 23397 | 0 |
| 23398 | 0 |
| 23399 | 0 |
| 23400 | 0 |
| 23401 | 0 |
| 23402 | 0 |
| 23403 | 0 |
| 23404 | 0 |
| 23405 | 0 |
| 23406 | 0 |
| 23407 | 0 |
| 23408 | 0 |
| 23409 | 0 |
| 23410 | 0 |
| 23411 | 0 |
| 23412 | 0 |
| 23413 | 0 |
| 23414 | 0 |
| 23415 | 0 |
| 23416 | 0 |
| 23417 | 0 |
| 23418 | 0 |
| 23419 | 0 |
| 23420 | 0 |
| 23421 | 0 |
| 23422 | 0 |
| 23423 | 0 |
| 23424 | 0 |
| 23425 | 0 |
| 23426 | 0 |
| 23427 | 0 |
| 23428 | 0 |
| 23429 | 0 |
| 23430 | 0 |
| 23431 | 0 |

|       |   |
|-------|---|
| 23432 | 0 |
| 23433 | 0 |
| 23434 | 0 |
| 23435 | 0 |
| 23436 | 0 |
| 23437 | 0 |
| 23438 | 0 |
| 23439 | 0 |
| 23440 | 0 |
| 23441 | 0 |
| 23442 | 0 |
| 23443 | 0 |
| 23444 | 0 |
| 23445 | 0 |
| 23446 | 0 |
| 23447 | 0 |
| 23448 | 0 |
| 23449 | 0 |
| 23450 | 0 |
| 23451 | 0 |
| 23452 | 0 |
| 23453 | 0 |
| 23454 | 0 |
| 23455 | 0 |
| 23456 | 0 |
| 23457 | 0 |
| 23458 | 0 |
| 23459 | 0 |
| 23460 | 0 |
| 23461 | 0 |
| 23462 | 0 |
| 23463 | 0 |
| 23464 | 0 |
| 23465 | 0 |
| 23466 | 0 |
| 23467 | 0 |
| 23468 | 0 |
| 23469 | 0 |
| 23470 | 0 |
| 23471 | 0 |
| 23472 | 0 |
| 23473 | 0 |
| 23474 | 0 |
| 23475 | 0 |
| 23476 | 0 |
| 23477 | 0 |
| 23478 | 0 |
| 23479 | 0 |
| 23480 | 0 |
| 23481 | 0 |

|       |   |
|-------|---|
| 23482 | 0 |
| 23483 | 0 |
| 23484 | 0 |
| 23485 | 0 |
| 23486 | 0 |
| 23487 | 0 |
| 23488 | 0 |
| 23489 | 0 |
| 23490 | 0 |
| 23491 | 0 |
| 23492 | 0 |
| 23493 | 0 |
| 23494 | 0 |
| 23495 | 0 |
| 23496 | 0 |
| 23497 | 0 |
| 23498 | 0 |
| 23499 | 0 |
| 23500 | 0 |
| 23501 | 0 |
| 23502 | 0 |
| 23503 | 0 |
| 23504 | 0 |
| 23505 | 0 |
| 23506 | 0 |
| 23507 | 0 |
| 23508 | 0 |
| 23509 | 0 |
| 23510 | 0 |
| 23511 | 0 |
| 23512 | 0 |
| 23513 | 0 |
| 23514 | 0 |
| 23515 | 0 |
| 23516 | 0 |
| 23517 | 0 |
| 23518 | 0 |
| 23519 | 0 |
| 23520 | 0 |
| 23521 | 0 |
| 23522 | 0 |
| 23523 | 0 |
| 23524 | 0 |
| 23525 | 0 |
| 23526 | 0 |
| 23527 | 0 |
| 23528 | 0 |
| 23529 | 0 |
| 23530 | 0 |
| 23531 | 0 |

|       |   |
|-------|---|
| 23532 | 0 |
| 23533 | 0 |
| 23534 | 0 |
| 23535 | 0 |
| 23536 | 0 |
| 23537 | 0 |
| 23538 | 0 |
| 23539 | 0 |
| 23540 | 0 |
| 23541 | 0 |
| 23542 | 0 |
| 23543 | 0 |
| 23544 | 0 |
| 23545 | 0 |
| 23546 | 0 |
| 23547 | 0 |
| 23548 | 0 |
| 23549 | 0 |
| 23550 | 0 |
| 23551 | 0 |
| 23552 | 0 |
| 23553 | 0 |
| 23554 | 0 |
| 23555 | 0 |
| 23556 | 0 |
| 23557 | 0 |
| 23558 | 0 |
| 23559 | 0 |
| 23560 | 0 |
| 23561 | 0 |
| 23562 | 0 |
| 23563 | 0 |
| 23564 | 0 |
| 23565 | 0 |
| 23566 | 0 |
| 23567 | 0 |
| 23568 | 0 |
| 23569 | 0 |
| 23570 | 0 |
| 23571 | 0 |
| 23572 | 0 |
| 23573 | 0 |
| 23574 | 0 |
| 23575 | 0 |
| 23576 | 0 |
| 23577 | 0 |
| 23578 | 0 |
| 23579 | 0 |
| 23580 | 0 |
| 23581 | 0 |



|       |   |
|-------|---|
| 23582 | 0 |
| 23583 | 0 |
| 23584 | 0 |
| 23585 | 0 |
| 23586 | 0 |
| 23587 | 0 |
| 23588 | 0 |
| 23589 | 0 |
| 23590 | 0 |
| 23591 | 0 |
| 23592 | 0 |
| 23593 | 0 |
| 23594 | 0 |
| 23595 | 0 |
| 23596 | 0 |
| 23597 | 0 |
| 23598 | 0 |
| 23599 | 0 |
| 23600 | 0 |
| 23601 | 0 |
| 23602 | 0 |
| 23603 | 0 |
| 23604 | 0 |
| 23605 | 0 |
| 23606 | 0 |
| 23607 | 0 |
| 23608 | 0 |
| 23609 | 0 |
| 23610 | 0 |
| 23611 | 0 |
| 23612 | 0 |
| 23613 | 0 |
| 23614 | 0 |
| 23615 | 0 |
| 23616 | 0 |
| 23617 | 0 |
| 23618 | 0 |
| 23619 | 0 |
| 23620 | 0 |
| 23621 | 0 |
| 23622 | 0 |
| 23623 | 0 |
| 23624 | 0 |
| 23625 | 0 |
| 23626 | 0 |
| 23627 | 0 |
| 23628 | 0 |
| 23629 | 0 |
| 23630 | 0 |
| 23631 | 0 |

|       |   |
|-------|---|
| 23632 | 0 |
| 23633 | 0 |
| 23634 | 0 |
| 23635 | 0 |
| 23636 | 0 |
| 23637 | 0 |
| 23638 | 0 |
| 23639 | 0 |
| 23640 | 0 |
| 23641 | 0 |
| 23642 | 0 |
| 23643 | 0 |
| 23644 | 0 |
| 23645 | 0 |
| 23646 | 0 |
| 23647 | 0 |
| 23648 | 0 |
| 23649 | 0 |
| 23650 | 0 |
| 23651 | 0 |
| 23652 | 0 |
| 23653 | 0 |
| 23654 | 0 |
| 23655 | 0 |
| 23656 | 0 |
| 23657 | 0 |
| 23658 | 0 |
| 23659 | 0 |
| 23660 | 0 |
| 23661 | 0 |
| 23662 | 0 |
| 23663 | 0 |
| 23664 | 0 |
| 23665 | 0 |
| 23666 | 0 |
| 23667 | 0 |
| 23668 | 0 |
| 23669 | 0 |
| 23670 | 0 |
| 23671 | 0 |
| 23672 | 0 |
| 23673 | 0 |
| 23674 | 0 |
| 23675 | 0 |
| 23676 | 0 |
| 23677 | 0 |
| 23678 | 0 |
| 23679 | 0 |
| 23680 | 0 |
| 23681 | 0 |

|       |   |
|-------|---|
| 23682 | 0 |
| 23683 | 0 |
| 23684 | 0 |
| 23685 | 0 |
| 23686 | 0 |
| 23687 | 0 |
| 23688 | 0 |
| 23689 | 0 |
| 23690 | 0 |
| 23691 | 0 |
| 23692 | 0 |
| 23693 | 0 |
| 23694 | 0 |
| 23695 | 0 |
| 23696 | 0 |
| 23697 | 0 |
| 23698 | 0 |
| 23699 | 0 |
| 23700 | 0 |
| 23701 | 0 |
| 23702 | 0 |
| 23703 | 0 |
| 23704 | 0 |
| 23705 | 0 |
| 23706 | 0 |
| 23707 | 0 |
| 23708 | 0 |
| 23709 | 0 |
| 23710 | 0 |
| 23711 | 0 |
| 23712 | 0 |
| 23713 | 0 |
| 23714 | 0 |
| 23715 | 0 |
| 23716 | 0 |
| 23717 | 0 |
| 23718 | 0 |
| 23719 | 0 |
| 23720 | 0 |
| 23721 | 0 |
| 23722 | 0 |
| 23723 | 0 |
| 23724 | 0 |
| 23725 | 0 |
| 23726 | 0 |
| 23727 | 0 |
| 23728 | 0 |
| 23729 | 0 |
| 23730 | 0 |
| 23731 | 0 |

|       |   |
|-------|---|
| 23732 | 0 |
| 23733 | 0 |
| 23734 | 0 |
| 23735 | 0 |
| 23736 | 0 |
| 23737 | 0 |
| 23738 | 0 |
| 23739 | 0 |
| 23740 | 0 |
| 23741 | 0 |
| 23742 | 0 |
| 23743 | 0 |
| 23744 | 0 |
| 23745 | 0 |
| 23746 | 0 |
| 23747 | 0 |
| 23748 | 0 |
| 23749 | 0 |
| 23750 | 0 |
| 23751 | 0 |
| 23752 | 0 |
| 23753 | 0 |
| 23754 | 0 |
| 23755 | 0 |
| 23756 | 0 |
| 23757 | 0 |
| 23758 | 0 |
| 23759 | 0 |
| 23760 | 0 |
| 23761 | 0 |
| 23762 | 0 |
| 23763 | 0 |
| 23764 | 0 |
| 23765 | 0 |
| 23766 | 0 |
| 23767 | 0 |
| 23768 | 0 |
| 23769 | 0 |
| 23770 | 0 |
| 23771 | 0 |
| 23772 | 0 |
| 23773 | 0 |
| 23774 | 0 |
| 23775 | 0 |
| 23776 | 0 |
| 23777 | 0 |
| 23778 | 0 |
| 23779 | 0 |
| 23780 | 0 |
| 23781 | 0 |

|       |   |
|-------|---|
| 23782 | 0 |
| 23783 | 0 |
| 23784 | 0 |
| 23785 | 0 |
| 23786 | 0 |
| 23787 | 0 |
| 23788 | 0 |
| 23789 | 0 |
| 23790 | 0 |
| 23791 | 0 |
| 23792 | 0 |
| 23793 | 0 |
| 23794 | 0 |
| 23795 | 0 |
| 23796 | 0 |
| 23797 | 0 |
| 23798 | 0 |
| 23799 | 0 |
| 23800 | 0 |
| 23801 | 0 |
| 23802 | 0 |
| 23803 | 0 |
| 23804 | 0 |
| 23805 | 0 |
| 23806 | 0 |
| 23807 | 0 |
| 23808 | 0 |
| 23809 | 0 |
| 23810 | 0 |
| 23811 | 0 |
| 23812 | 0 |
| 23813 | 0 |
| 23814 | 0 |
| 23815 | 0 |
| 23816 | 0 |
| 23817 | 0 |
| 23818 | 0 |
| 23819 | 0 |
| 23820 | 0 |
| 23821 | 0 |
| 23822 | 0 |
| 23823 | 0 |
| 23824 | 0 |
| 23825 | 0 |
| 23826 | 0 |
| 23827 | 0 |
| 23828 | 0 |
| 23829 | 0 |
| 23830 | 0 |
| 23831 | 0 |

|       |   |
|-------|---|
| 23832 | 0 |
| 23833 | 0 |
| 23834 | 0 |
| 23835 | 0 |
| 23836 | 0 |
| 23837 | 0 |
| 23838 | 0 |
| 23839 | 0 |
| 23840 | 0 |
| 23841 | 0 |
| 23842 | 0 |
| 23843 | 0 |
| 23844 | 0 |
| 23845 | 0 |
| 23846 | 0 |
| 23847 | 0 |
| 23848 | 0 |
| 23849 | 0 |
| 23850 | 0 |
| 23851 | 0 |
| 23852 | 0 |
| 23853 | 0 |
| 23854 | 0 |
| 23855 | 0 |
| 23856 | 0 |
| 23857 | 0 |
| 23858 | 0 |
| 23859 | 0 |
| 23860 | 0 |
| 23861 | 0 |
| 23862 | 0 |
| 23863 | 0 |
| 23864 | 0 |
| 23865 | 0 |
| 23866 | 0 |
| 23867 | 0 |
| 23868 | 0 |
| 23869 | 0 |
| 23870 | 0 |
| 23871 | 0 |
| 23872 | 0 |
| 23873 | 0 |
| 23874 | 0 |
| 23875 | 0 |
| 23876 | 0 |
| 23877 | 0 |
| 23878 | 0 |
| 23879 | 0 |
| 23880 | 0 |
| 23881 | 0 |

|       |   |
|-------|---|
| 23882 | 0 |
| 23883 | 0 |
| 23884 | 0 |
| 23885 | 0 |
| 23886 | 0 |
| 23887 | 0 |
| 23888 | 0 |
| 23889 | 0 |
| 23890 | 0 |
| 23891 | 0 |
| 23892 | 0 |
| 23893 | 0 |
| 23894 | 0 |
| 23895 | 0 |
| 23896 | 0 |
| 23897 | 0 |
| 23898 | 0 |
| 23899 | 0 |
| 23900 | 0 |
| 23901 | 0 |
| 23902 | 0 |
| 23903 | 0 |
| 23904 | 0 |
| 23905 | 0 |
| 23906 | 0 |
| 23907 | 0 |
| 23908 | 0 |
| 23909 | 0 |
| 23910 | 0 |
| 23911 | 0 |
| 23912 | 0 |
| 23913 | 0 |
| 23914 | 0 |
| 23915 | 0 |
| 23916 | 0 |
| 23917 | 0 |
| 23918 | 0 |
| 23919 | 0 |
| 23920 | 0 |
| 23921 | 0 |
| 23922 | 0 |
| 23923 | 0 |
| 23924 | 0 |
| 23925 | 0 |
| 23926 | 0 |
| 23927 | 0 |
| 23928 | 0 |
| 23929 | 0 |
| 23930 | 0 |
| 23931 | 0 |

|       |   |
|-------|---|
| 23932 | 0 |
| 23933 | 0 |
| 23934 | 0 |
| 23935 | 0 |
| 23936 | 0 |
| 23937 | 0 |
| 23938 | 0 |
| 23939 | 0 |
| 23940 | 0 |
| 23941 | 0 |
| 23942 | 0 |
| 23943 | 0 |
| 23944 | 0 |
| 23945 | 0 |
| 23946 | 0 |
| 23947 | 0 |
| 23948 | 0 |
| 23949 | 0 |
| 23950 | 0 |
| 23951 | 0 |
| 23952 | 0 |
| 23953 | 0 |
| 23954 | 0 |
| 23955 | 0 |
| 23956 | 0 |
| 23957 | 0 |
| 23958 | 0 |
| 23959 | 0 |
| 23960 | 0 |
| 23961 | 0 |
| 23962 | 0 |
| 23963 | 0 |
| 23964 | 0 |
| 23965 | 0 |
| 23966 | 0 |
| 23967 | 0 |
| 23968 | 0 |
| 23969 | 0 |
| 23970 | 0 |
| 23971 | 0 |
| 23972 | 0 |
| 23973 | 0 |
| 23974 | 0 |
| 23975 | 0 |
| 23976 | 0 |
| 23977 | 0 |
| 23978 | 0 |
| 23979 | 0 |
| 23980 | 0 |
| 23981 | 0 |



|       |   |
|-------|---|
| 23982 | 0 |
| 23983 | 0 |
| 23984 | 0 |
| 23985 | 0 |
| 23986 | 0 |
| 23987 | 0 |
| 23988 | 0 |
| 23989 | 0 |
| 23990 | 0 |
| 23991 | 0 |
| 23992 | 0 |
| 23993 | 0 |
| 23994 | 0 |
| 23995 | 0 |
| 23996 | 0 |
| 23997 | 0 |
| 23998 | 0 |
| 23999 | 0 |
| 24000 | 0 |
| 24001 | 0 |
| 24002 | 0 |
| 24003 | 0 |
| 24004 | 0 |
| 24005 | 0 |
| 24006 | 0 |
| 24007 | 0 |
| 24008 | 0 |
| 24009 | 0 |
| 24010 | 0 |
| 24011 | 0 |
| 24012 | 0 |
| 24013 | 0 |
| 24014 | 0 |
| 24015 | 0 |
| 24016 | 0 |
| 24017 | 0 |
| 24018 | 0 |
| 24019 | 0 |
| 24020 | 0 |
| 24021 | 0 |
| 24022 | 0 |
| 24023 | 0 |
| 24024 | 0 |
| 24025 | 0 |
| 24026 | 0 |
| 24027 | 0 |
| 24028 | 0 |
| 24029 | 0 |
| 24030 | 0 |
| 24031 | 0 |

|       |   |
|-------|---|
| 24032 | 0 |
| 24033 | 0 |
| 24034 | 0 |
| 24035 | 0 |
| 24036 | 0 |
| 24037 | 0 |
| 24038 | 0 |
| 24039 | 0 |
| 24040 | 0 |
| 24041 | 0 |
| 24042 | 0 |
| 24043 | 0 |
| 24044 | 0 |
| 24045 | 0 |
| 24046 | 0 |
| 24047 | 0 |
| 24048 | 0 |
| 24049 | 0 |
| 24050 | 0 |
| 24051 | 0 |
| 24052 | 0 |
| 24053 | 0 |
| 24054 | 0 |
| 24055 | 0 |
| 24056 | 0 |
| 24057 | 0 |
| 24058 | 0 |
| 24059 | 0 |
| 24060 | 0 |
| 24061 | 0 |
| 24062 | 0 |
| 24063 | 0 |
| 24064 | 0 |
| 24065 | 0 |
| 24066 | 0 |
| 24067 | 0 |
| 24068 | 0 |
| 24069 | 0 |
| 24070 | 0 |
| 24071 | 0 |
| 24072 | 0 |
| 24073 | 0 |
| 24074 | 0 |
| 24075 | 0 |
| 24076 | 0 |
| 24077 | 0 |
| 24078 | 0 |
| 24079 | 0 |
| 24080 | 0 |
| 24081 | 0 |

|       |   |
|-------|---|
| 24082 | 0 |
| 24083 | 0 |
| 24084 | 0 |
| 24085 | 0 |
| 24086 | 0 |
| 24087 | 0 |
| 24088 | 0 |
| 24089 | 0 |
| 24090 | 0 |
| 24091 | 0 |
| 24092 | 0 |
| 24093 | 0 |
| 24094 | 0 |
| 24095 | 0 |
| 24096 | 0 |
| 24097 | 0 |
| 24098 | 0 |
| 24099 | 0 |
| 24100 | 0 |
| 24101 | 0 |
| 24102 | 0 |
| 24103 | 0 |
| 24104 | 0 |
| 24105 | 0 |
| 24106 | 0 |
| 24107 | 0 |
| 24108 | 0 |
| 24109 | 0 |
| 24110 | 0 |
| 24111 | 0 |
| 24112 | 0 |
| 24113 | 0 |
| 24114 | 0 |
| 24115 | 0 |
| 24116 | 0 |
| 24117 | 0 |
| 24118 | 0 |
| 24119 | 0 |
| 24120 | 0 |
| 24121 | 0 |
| 24122 | 0 |
| 24123 | 0 |
| 24124 | 0 |
| 24125 | 0 |
| 24126 | 0 |
| 24127 | 0 |
| 24128 | 0 |
| 24129 | 0 |
| 24130 | 0 |
| 24131 | 0 |

|       |   |
|-------|---|
| 24132 | 0 |
| 24133 | 0 |
| 24134 | 0 |
| 24135 | 0 |
| 24136 | 0 |
| 24137 | 0 |
| 24138 | 0 |
| 24139 | 0 |
| 24140 | 0 |
| 24141 | 0 |
| 24142 | 0 |
| 24143 | 0 |
| 24144 | 0 |
| 24145 | 0 |
| 24146 | 0 |
| 24147 | 0 |
| 24148 | 0 |
| 24149 | 0 |
| 24150 | 0 |
| 24151 | 0 |
| 24152 | 0 |
| 24153 | 0 |
| 24154 | 0 |
| 24155 | 0 |
| 24156 | 0 |
| 24157 | 0 |
| 24158 | 0 |
| 24159 | 0 |
| 24160 | 0 |
| 24161 | 0 |
| 24162 | 0 |
| 24163 | 0 |
| 24164 | 0 |
| 24165 | 0 |
| 24166 | 0 |
| 24167 | 0 |
| 24168 | 0 |
| 24169 | 0 |
| 24170 | 0 |
| 24171 | 0 |
| 24172 | 0 |
| 24173 | 0 |
| 24174 | 0 |
| 24175 | 0 |
| 24176 | 0 |
| 24177 | 0 |
| 24178 | 0 |
| 24179 | 0 |
| 24180 | 0 |
| 24181 | 0 |

|       |   |
|-------|---|
| 24182 | 0 |
| 24183 | 0 |
| 24184 | 0 |
| 24185 | 0 |
| 24186 | 0 |
| 24187 | 0 |
| 24188 | 0 |
| 24189 | 0 |
| 24190 | 0 |
| 24191 | 0 |
| 24192 | 0 |
| 24193 | 0 |
| 24194 | 0 |
| 24195 | 0 |
| 24196 | 0 |
| 24197 | 0 |
| 24198 | 0 |
| 24199 | 0 |
| 24200 | 0 |
| 24201 | 0 |
| 24202 | 0 |
| 24203 | 0 |
| 24204 | 0 |
| 24205 | 0 |
| 24206 | 0 |
| 24207 | 0 |
| 24208 | 0 |
| 24209 | 0 |
| 24210 | 0 |
| 24211 | 0 |
| 24212 | 0 |
| 24213 | 0 |
| 24214 | 0 |
| 24215 | 0 |
| 24216 | 0 |
| 24217 | 0 |
| 24218 | 0 |
| 24219 | 0 |
| 24220 | 0 |
| 24221 | 0 |
| 24222 | 0 |
| 24223 | 0 |
| 24224 | 0 |
| 24225 | 0 |
| 24226 | 0 |
| 24227 | 0 |
| 24228 | 0 |
| 24229 | 0 |
| 24230 | 0 |
| 24231 | 0 |

|       |   |
|-------|---|
| 24232 | 0 |
| 24233 | 0 |
| 24234 | 0 |
| 24235 | 0 |
| 24236 | 0 |
| 24237 | 0 |
| 24238 | 0 |
| 24239 | 0 |
| 24240 | 0 |
| 24241 | 0 |
| 24242 | 0 |
| 24243 | 0 |
| 24244 | 0 |
| 24245 | 0 |
| 24246 | 0 |
| 24247 | 0 |
| 24248 | 0 |
| 24249 | 0 |
| 24250 | 0 |
| 24251 | 0 |
| 24252 | 0 |
| 24253 | 0 |
| 24254 | 0 |
| 24255 | 0 |
| 24256 | 0 |
| 24257 | 0 |
| 24258 | 0 |
| 24259 | 0 |
| 24260 | 0 |
| 24261 | 0 |
| 24262 | 0 |
| 24263 | 0 |
| 24264 | 0 |
| 24265 | 0 |
| 24266 | 0 |
| 24267 | 0 |
| 24268 | 0 |
| 24269 | 0 |
| 24270 | 0 |
| 24271 | 0 |
| 24272 | 0 |
| 24273 | 0 |
| 24274 | 0 |
| 24275 | 0 |
| 24276 | 0 |
| 24277 | 0 |
| 24278 | 0 |
| 24279 | 0 |
| 24280 | 0 |
| 24281 | 0 |

|       |   |
|-------|---|
| 24282 | 0 |
| 24283 | 0 |
| 24284 | 0 |
| 24285 | 0 |
| 24286 | 0 |
| 24287 | 0 |
| 24288 | 0 |
| 24289 | 0 |
| 24290 | 0 |
| 24291 | 0 |
| 24292 | 0 |
| 24293 | 0 |
| 24294 | 0 |
| 24295 | 0 |
| 24296 | 0 |
| 24297 | 0 |
| 24298 | 0 |
| 24299 | 0 |
| 24300 | 0 |
| 24301 | 0 |
| 24302 | 0 |
| 24303 | 0 |
| 24304 | 0 |
| 24305 | 0 |
| 24306 | 0 |
| 24307 | 0 |
| 24308 | 0 |
| 24309 | 0 |
| 24310 | 0 |
| 24311 | 0 |
| 24312 | 0 |
| 24313 | 0 |
| 24314 | 0 |
| 24315 | 0 |
| 24316 | 0 |
| 24317 | 0 |
| 24318 | 0 |
| 24319 | 0 |
| 24320 | 0 |
| 24321 | 0 |
| 24322 | 0 |
| 24323 | 0 |
| 24324 | 0 |
| 24325 | 0 |
| 24326 | 0 |
| 24327 | 0 |
| 24328 | 0 |
| 24329 | 0 |
| 24330 | 0 |
| 24331 | 0 |

|       |   |
|-------|---|
| 24332 | 0 |
| 24333 | 0 |
| 24334 | 0 |
| 24335 | 0 |
| 24336 | 0 |
| 24337 | 0 |
| 24338 | 0 |
| 24339 | 0 |
| 24340 | 0 |
| 24341 | 0 |
| 24342 | 0 |
| 24343 | 0 |
| 24344 | 0 |
| 24345 | 0 |
| 24346 | 0 |
| 24347 | 0 |
| 24348 | 0 |
| 24349 | 0 |
| 24350 | 0 |
| 24351 | 0 |
| 24352 | 0 |
| 24353 | 0 |
| 24354 | 0 |
| 24355 | 0 |
| 24356 | 0 |
| 24357 | 0 |
| 24358 | 0 |
| 24359 | 0 |
| 24360 | 0 |
| 24361 | 0 |
| 24362 | 0 |
| 24363 | 0 |
| 24364 | 0 |
| 24365 | 0 |
| 24366 | 0 |
| 24367 | 0 |
| 24368 | 0 |
| 24369 | 0 |
| 24370 | 0 |
| 24371 | 0 |
| 24372 | 0 |
| 24373 | 0 |
| 24374 | 0 |
| 24375 | 0 |
| 24376 | 0 |
| 24377 | 0 |
| 24378 | 0 |
| 24379 | 0 |
| 24380 | 0 |
| 24381 | 0 |



|       |   |
|-------|---|
| 24382 | 0 |
| 24383 | 0 |
| 24384 | 0 |
| 24385 | 0 |
| 24386 | 0 |
| 24387 | 0 |
| 24388 | 0 |
| 24389 | 0 |
| 24390 | 0 |
| 24391 | 0 |
| 24392 | 0 |
| 24393 | 0 |
| 24394 | 0 |
| 24395 | 0 |
| 24396 | 0 |
| 24397 | 0 |
| 24398 | 0 |
| 24399 | 0 |
| 24400 | 0 |
| 24401 | 0 |
| 24402 | 0 |
| 24403 | 0 |
| 24404 | 0 |
| 24405 | 0 |
| 24406 | 0 |
| 24407 | 0 |
| 24408 | 0 |
| 24409 | 0 |
| 24410 | 0 |
| 24411 | 0 |
| 24412 | 0 |
| 24413 | 0 |
| 24414 | 0 |
| 24415 | 0 |
| 24416 | 0 |
| 24417 | 0 |
| 24418 | 0 |
| 24419 | 0 |
| 24420 | 0 |
| 24421 | 0 |
| 24422 | 0 |
| 24423 | 0 |
| 24424 | 0 |
| 24425 | 0 |
| 24426 | 0 |
| 24427 | 0 |
| 24428 | 0 |
| 24429 | 0 |
| 24430 | 0 |
| 24431 | 0 |

|       |   |
|-------|---|
| 24432 | 0 |
| 24433 | 0 |
| 24434 | 0 |
| 24435 | 0 |
| 24436 | 0 |
| 24437 | 0 |
| 24438 | 0 |
| 24439 | 0 |
| 24440 | 0 |
| 24441 | 0 |
| 24442 | 0 |
| 24443 | 0 |
| 24444 | 0 |
| 24445 | 0 |
| 24446 | 0 |
| 24447 | 0 |
| 24448 | 0 |
| 24449 | 0 |
| 24450 | 0 |
| 24451 | 0 |
| 24452 | 0 |
| 24453 | 0 |
| 24454 | 0 |
| 24455 | 0 |
| 24456 | 0 |
| 24457 | 0 |
| 24458 | 0 |
| 24459 | 0 |
| 24460 | 0 |
| 24461 | 0 |
| 24462 | 0 |
| 24463 | 0 |
| 24464 | 0 |
| 24465 | 0 |
| 24466 | 0 |
| 24467 | 0 |
| 24468 | 0 |
| 24469 | 0 |
| 24470 | 0 |
| 24471 | 0 |
| 24472 | 0 |
| 24473 | 0 |
| 24474 | 0 |
| 24475 | 0 |
| 24476 | 0 |
| 24477 | 0 |
| 24478 | 0 |
| 24479 | 0 |
| 24480 | 0 |
| 24481 | 0 |

|       |   |
|-------|---|
| 24482 | 0 |
| 24483 | 0 |
| 24484 | 0 |
| 24485 | 0 |
| 24486 | 0 |
| 24487 | 0 |
| 24488 | 0 |
| 24489 | 0 |
| 24490 | 0 |
| 24491 | 0 |
| 24492 | 0 |
| 24493 | 0 |
| 24494 | 0 |
| 24495 | 0 |
| 24496 | 0 |
| 24497 | 0 |
| 24498 | 0 |
| 24499 | 0 |
| 24500 | 0 |
| 24501 | 0 |
| 24502 | 0 |
| 24503 | 0 |
| 24504 | 0 |
| 24505 | 0 |
| 24506 | 0 |
| 24507 | 0 |
| 24508 | 0 |
| 24509 | 0 |
| 24510 | 0 |
| 24511 | 0 |
| 24512 | 0 |
| 24513 | 0 |
| 24514 | 0 |
| 24515 | 0 |
| 24516 | 0 |
| 24517 | 0 |
| 24518 | 0 |
| 24519 | 0 |
| 24520 | 0 |
| 24521 | 0 |
| 24522 | 0 |
| 24523 | 0 |
| 24524 | 0 |
| 24525 | 0 |
| 24526 | 0 |
| 24527 | 0 |
| 24528 | 0 |
| 24529 | 0 |
| 24530 | 0 |
| 24531 | 0 |

|       |   |
|-------|---|
| 24532 | 0 |
| 24533 | 0 |
| 24534 | 0 |
| 24535 | 0 |
| 24536 | 0 |
| 24537 | 0 |
| 24538 | 0 |
| 24539 | 0 |
| 24540 | 0 |
| 24541 | 0 |
| 24542 | 0 |
| 24543 | 0 |
| 24544 | 0 |
| 24545 | 0 |
| 24546 | 0 |
| 24547 | 0 |
| 24548 | 0 |
| 24549 | 0 |
| 24550 | 0 |
| 24551 | 0 |
| 24552 | 0 |
| 24553 | 0 |
| 24554 | 0 |
| 24555 | 0 |
| 24556 | 0 |
| 24557 | 0 |
| 24558 | 0 |
| 24559 | 0 |
| 24560 | 0 |
| 24561 | 0 |
| 24562 | 0 |
| 24563 | 0 |
| 24564 | 0 |
| 24565 | 0 |
| 24566 | 0 |
| 24567 | 0 |
| 24568 | 0 |
| 24569 | 0 |
| 24570 | 0 |
| 24571 | 0 |
| 24572 | 0 |
| 24573 | 0 |
| 24574 | 0 |
| 24575 | 0 |
| 24576 | 0 |
| 24577 | 0 |
| 24578 | 0 |
| 24579 | 0 |
| 24580 | 0 |
| 24581 | 0 |

|       |   |
|-------|---|
| 24582 | 0 |
| 24583 | 0 |
| 24584 | 0 |
| 24585 | 0 |
| 24586 | 0 |
| 24587 | 0 |
| 24588 | 0 |
| 24589 | 0 |
| 24590 | 0 |
| 24591 | 0 |
| 24592 | 0 |
| 24593 | 0 |
| 24594 | 0 |
| 24595 | 0 |
| 24596 | 0 |
| 24597 | 0 |
| 24598 | 0 |
| 24599 | 0 |
| 24600 | 0 |
| 24601 | 0 |
| 24602 | 0 |
| 24603 | 0 |
| 24604 | 0 |
| 24605 | 0 |
| 24606 | 0 |
| 24607 | 0 |
| 24608 | 0 |
| 24609 | 0 |
| 24610 | 0 |
| 24611 | 0 |
| 24612 | 0 |
| 24613 | 0 |
| 24614 | 0 |
| 24615 | 0 |
| 24616 | 0 |
| 24617 | 0 |
| 24618 | 0 |
| 24619 | 0 |
| 24620 | 0 |
| 24621 | 0 |
| 24622 | 0 |
| 24623 | 0 |
| 24624 | 0 |
| 24625 | 0 |
| 24626 | 0 |
| 24627 | 0 |
| 24628 | 0 |
| 24629 | 0 |
| 24630 | 0 |
| 24631 | 0 |

|       |   |
|-------|---|
| 24632 | 0 |
| 24633 | 0 |
| 24634 | 0 |
| 24635 | 0 |
| 24636 | 0 |
| 24637 | 0 |
| 24638 | 0 |
| 24639 | 0 |
| 24640 | 0 |
| 24641 | 0 |
| 24642 | 0 |
| 24643 | 0 |
| 24644 | 0 |
| 24645 | 0 |
| 24646 | 0 |
| 24647 | 0 |
| 24648 | 0 |
| 24649 | 0 |
| 24650 | 0 |
| 24651 | 0 |
| 24652 | 0 |
| 24653 | 0 |
| 24654 | 0 |
| 24655 | 0 |
| 24656 | 0 |
| 24657 | 0 |
| 24658 | 0 |
| 24659 | 0 |
| 24660 | 0 |
| 24661 | 0 |
| 24662 | 0 |
| 24663 | 0 |
| 24664 | 0 |
| 24665 | 0 |
| 24666 | 0 |
| 24667 | 0 |
| 24668 | 0 |
| 24669 | 0 |
| 24670 | 0 |
| 24671 | 0 |
| 24672 | 0 |
| 24673 | 0 |
| 24674 | 0 |
| 24675 | 0 |
| 24676 | 0 |
| 24677 | 0 |
| 24678 | 0 |
| 24679 | 0 |
| 24680 | 0 |
| 24681 | 0 |

|       |   |
|-------|---|
| 24682 | 0 |
| 24683 | 0 |
| 24684 | 0 |
| 24685 | 0 |
| 24686 | 0 |
| 24687 | 0 |
| 24688 | 0 |
| 24689 | 0 |
| 24690 | 0 |
| 24691 | 0 |
| 24692 | 0 |
| 24693 | 0 |
| 24694 | 0 |
| 24695 | 0 |
| 24696 | 0 |
| 24697 | 0 |
| 24698 | 0 |
| 24699 | 0 |
| 24700 | 0 |
| 24701 | 0 |
| 24702 | 0 |
| 24703 | 0 |
| 24704 | 0 |
| 24705 | 0 |
| 24706 | 0 |
| 24707 | 0 |
| 24708 | 0 |
| 24709 | 0 |
| 24710 | 0 |
| 24711 | 0 |
| 24712 | 0 |
| 24713 | 0 |
| 24714 | 0 |
| 24715 | 0 |
| 24716 | 0 |
| 24717 | 0 |
| 24718 | 0 |
| 24719 | 0 |
| 24720 | 0 |
| 24721 | 0 |
| 24722 | 0 |
| 24723 | 0 |
| 24724 | 0 |
| 24725 | 0 |
| 24726 | 0 |
| 24727 | 0 |
| 24728 | 0 |
| 24729 | 0 |
| 24730 | 0 |
| 24731 | 0 |

|       |   |
|-------|---|
| 24732 | 0 |
| 24733 | 0 |
| 24734 | 0 |
| 24735 | 0 |
| 24736 | 0 |
| 24737 | 0 |
| 24738 | 0 |
| 24739 | 0 |
| 24740 | 0 |
| 24741 | 0 |
| 24742 | 0 |
| 24743 | 0 |
| 24744 | 0 |
| 24745 | 0 |
| 24746 | 0 |
| 24747 | 0 |
| 24748 | 0 |
| 24749 | 0 |
| 24750 | 0 |
| 24751 | 0 |
| 24752 | 0 |
| 24753 | 0 |
| 24754 | 0 |
| 24755 | 0 |
| 24756 | 0 |
| 24757 | 0 |
| 24758 | 0 |
| 24759 | 0 |
| 24760 | 0 |
| 24761 | 0 |
| 24762 | 0 |
| 24763 | 0 |
| 24764 | 0 |
| 24765 | 0 |
| 24766 | 0 |
| 24767 | 0 |
| 24768 | 0 |
| 24769 | 0 |
| 24770 | 0 |
| 24771 | 0 |
| 24772 | 0 |
| 24773 | 0 |
| 24774 | 0 |
| 24775 | 0 |
| 24776 | 0 |
| 24777 | 0 |
| 24778 | 0 |
| 24779 | 0 |
| 24780 | 0 |
| 24781 | 0 |



|       |   |
|-------|---|
| 24782 | 0 |
| 24783 | 0 |
| 24784 | 0 |
| 24785 | 0 |
| 24786 | 0 |
| 24787 | 0 |
| 24788 | 0 |
| 24789 | 0 |
| 24790 | 0 |
| 24791 | 0 |
| 24792 | 0 |
| 24793 | 0 |
| 24794 | 0 |
| 24795 | 0 |
| 24796 | 0 |
| 24797 | 0 |
| 24798 | 0 |
| 24799 | 0 |
| 24800 | 0 |
| 24801 | 0 |
| 24802 | 0 |
| 24803 | 0 |
| 24804 | 0 |
| 24805 | 0 |
| 24806 | 0 |
| 24807 | 0 |
| 24808 | 0 |
| 24809 | 0 |
| 24810 | 0 |
| 24811 | 0 |
| 24812 | 0 |
| 24813 | 0 |
| 24814 | 0 |
| 24815 | 0 |
| 24816 | 0 |
| 24817 | 0 |
| 24818 | 0 |
| 24819 | 0 |
| 24820 | 0 |
| 24821 | 0 |
| 24822 | 0 |
| 24823 | 0 |
| 24824 | 0 |
| 24825 | 0 |
| 24826 | 0 |
| 24827 | 0 |
| 24828 | 0 |
| 24829 | 0 |
| 24830 | 0 |
| 24831 | 0 |

|       |   |
|-------|---|
| 24832 | 0 |
| 24833 | 0 |
| 24834 | 0 |
| 24835 | 0 |
| 24836 | 0 |
| 24837 | 0 |
| 24838 | 0 |
| 24839 | 0 |
| 24840 | 0 |
| 24841 | 0 |
| 24842 | 0 |
| 24843 | 0 |
| 24844 | 0 |
| 24845 | 0 |
| 24846 | 0 |
| 24847 | 0 |
| 24849 | 0 |
| 24850 | 0 |
| 24851 | 0 |
| 24852 | 0 |
| 24853 | 0 |
| 24854 | 0 |
| 24855 | 0 |
| 24856 | 0 |
| 24857 | 0 |
| 24858 | 0 |
| 24859 | 0 |
| 24860 | 0 |
| 24861 | 0 |
| 24862 | 0 |
| 24863 | 0 |
| 24864 | 0 |
| 24865 | 0 |
| 24866 | 0 |
| 24867 | 0 |
| 24868 | 0 |
| 24869 | 0 |
| 24870 | 0 |
| 24871 | 0 |
| 24872 | 0 |
| 24873 | 0 |
| 24874 | 0 |
| 24875 | 0 |
| 24876 | 0 |
| 24877 | 0 |
| 24878 | 0 |
| 24879 | 0 |
| 24880 | 0 |
| 24881 | 0 |
| 24882 | 0 |

|       |   |
|-------|---|
| 24883 | 0 |
| 24884 | 0 |
| 24885 | 0 |
| 24886 | 0 |
| 24887 | 0 |
| 24888 | 0 |
| 24889 | 0 |
| 24890 | 0 |
| 24891 | 0 |
| 24892 | 0 |
| 24893 | 0 |
| 24894 | 0 |
| 24895 | 0 |
| 24896 | 0 |
| 24897 | 0 |
| 24898 | 0 |
| 24899 | 0 |
| 24900 | 0 |
| 24901 | 0 |
| 24902 | 0 |
| 24903 | 0 |
| 24904 | 0 |
| 24905 | 0 |
| 24906 | 0 |
| 24907 | 0 |
| 24908 | 0 |
| 24909 | 0 |
| 24910 | 0 |
| 24911 | 0 |
| 24912 | 0 |
| 24913 | 0 |
| 24914 | 0 |
| 24915 | 0 |
| 24916 | 0 |
| 24917 | 0 |
| 24918 | 0 |
| 24919 | 0 |
| 24920 | 0 |
| 24921 | 0 |
| 24922 | 0 |
| 24923 | 0 |
| 24924 | 0 |
| 24925 | 0 |
| 24926 | 0 |
| 24927 | 0 |
| 24928 | 0 |
| 24929 | 0 |
| 24930 | 0 |
| 24931 | 0 |
| 24932 | 0 |

|       |   |
|-------|---|
| 24933 | 0 |
| 24934 | 0 |
| 24935 | 0 |
| 24936 | 0 |
| 24937 | 0 |
| 24938 | 0 |
| 24939 | 0 |
| 24940 | 0 |
| 24941 | 0 |
| 24942 | 0 |
| 24943 | 0 |
| 24944 | 0 |
| 24945 | 0 |
| 24946 | 0 |
| 24947 | 0 |
| 24948 | 0 |
| 24949 | 0 |
| 24950 | 0 |
| 24951 | 0 |
| 24952 | 0 |
| 24953 | 0 |
| 24954 | 0 |
| 24955 | 0 |
| 24956 | 0 |
| 24957 | 0 |
| 24958 | 0 |
| 24959 | 0 |
| 24960 | 0 |
| 24961 | 0 |
| 24962 | 0 |
| 24963 | 0 |
| 24964 | 0 |
| 24965 | 0 |
| 24966 | 0 |
| 24967 | 0 |
| 24968 | 0 |
| 24969 | 0 |
| 24970 | 0 |
| 24971 | 0 |
| 24972 | 0 |
| 24973 | 0 |
| 24974 | 0 |
| 24975 | 0 |
| 24976 | 0 |
| 24977 | 0 |
| 24978 | 0 |
| 24979 | 0 |
| 24980 | 0 |
| 24981 | 0 |
| 24982 | 0 |

|       |   |
|-------|---|
| 24983 | 0 |
| 24984 | 0 |
| 24985 | 0 |
| 24986 | 0 |
| 24987 | 0 |
| 24988 | 0 |
| 24989 | 0 |
| 24990 | 0 |
| 24991 | 0 |
| 24992 | 0 |
| 24993 | 0 |
| 24994 | 0 |
| 24995 | 0 |
| 24996 | 0 |
| 24997 | 0 |
| 24998 | 0 |
| 24999 | 0 |
| 25000 | 0 |
| 25001 | 0 |
| 25002 | 0 |
| 25003 | 0 |
| 25004 | 0 |
| 25006 | 0 |
| 25007 | 0 |
| 25008 | 0 |
| 25009 | 0 |
| 25010 | 0 |
| 25011 | 0 |
| 25012 | 0 |
| 25013 | 0 |
| 25014 | 0 |
| 25015 | 0 |
| 25016 | 0 |
| 25017 | 0 |
| 25018 | 0 |
| 25019 | 0 |
| 25020 | 0 |
| 25021 | 0 |
| 25022 | 0 |
| 25023 | 0 |
| 25024 | 0 |
| 25025 | 0 |
| 25026 | 0 |
| 25027 | 0 |
| 25028 | 0 |
| 25029 | 0 |
| 25030 | 0 |
| 25031 | 0 |
| 25032 | 0 |
| 25033 | 0 |

|       |   |
|-------|---|
| 25034 | 0 |
| 25035 | 0 |
| 25036 | 0 |
| 25037 | 0 |
| 25038 | 0 |
| 25039 | 0 |
| 25040 | 0 |
| 25041 | 0 |
| 25042 | 0 |
| 25043 | 0 |
| 25044 | 0 |
| 25045 | 0 |
| 25046 | 0 |
| 25048 | 0 |
| 25049 | 0 |
| 25050 | 0 |
| 25051 | 0 |
| 25052 | 0 |
| 25053 | 0 |
| 25054 | 0 |
| 25055 | 0 |
| 25056 | 0 |
| 25057 | 0 |
| 25058 | 0 |
| 25059 | 0 |
| 25060 | 0 |
| 25061 | 0 |
| 25062 | 0 |
| 25063 | 0 |
| 25064 | 0 |
| 25065 | 0 |
| 25066 | 0 |
| 25067 | 0 |
| 25068 | 0 |
| 25069 | 0 |
| 25070 | 0 |
| 25071 | 0 |
| 25072 | 0 |
| 25073 | 0 |
| 25074 | 0 |
| 25075 | 0 |
| 25076 | 0 |
| 25077 | 0 |
| 25078 | 0 |
| 25079 | 0 |
| 25080 | 0 |
| 25081 | 0 |
| 25082 | 0 |
| 25083 | 0 |
| 25084 | 0 |

|       |   |
|-------|---|
| 25085 | 0 |
| 25086 | 0 |
| 25087 | 0 |
| 25088 | 0 |
| 25089 | 0 |
| 25090 | 0 |
| 25091 | 0 |
| 25092 | 0 |
| 25093 | 0 |
| 25094 | 0 |
| 25095 | 0 |
| 25096 | 0 |
| 25097 | 0 |
| 25098 | 0 |
| 25099 | 0 |
| 25100 | 0 |
| 25101 | 0 |
| 25102 | 0 |
| 25103 | 0 |
| 25104 | 0 |
| 25105 | 0 |
| 25106 | 0 |
| 25107 | 0 |
| 25108 | 0 |
| 25109 | 0 |
| 25110 | 0 |
| 25111 | 0 |
| 25112 | 0 |
| 25113 | 0 |
| 25114 | 0 |
| 25115 | 0 |
| 25116 | 0 |
| 25117 | 0 |
| 25118 | 0 |
| 25119 | 0 |
| 25120 | 0 |
| 25121 | 0 |
| 25122 | 0 |
| 25123 | 0 |
| 25124 | 0 |
| 25125 | 0 |
| 25126 | 0 |
| 25127 | 0 |
| 25128 | 0 |
| 25129 | 0 |
| 25130 | 0 |
| 25131 | 0 |
| 25132 | 0 |
| 25133 | 0 |
| 25134 | 0 |

|       |   |
|-------|---|
| 25135 | 0 |
| 25136 | 0 |
| 25137 | 0 |
| 25138 | 0 |
| 25139 | 0 |
| 25140 | 0 |
| 25141 | 0 |
| 25142 | 0 |
| 25143 | 0 |
| 25144 | 0 |
| 25145 | 0 |
| 25146 | 0 |
| 25147 | 0 |
| 25148 | 0 |
| 25149 | 0 |
| 25150 | 0 |
| 25151 | 0 |
| 25152 | 0 |
| 25153 | 0 |
| 25154 | 0 |
| 25155 | 0 |
| 25156 | 0 |
| 25157 | 0 |
| 25158 | 0 |
| 25159 | 0 |
| 25160 | 0 |
| 25161 | 0 |
| 25162 | 0 |
| 25163 | 0 |
| 25164 | 0 |
| 25165 | 0 |
| 25166 | 0 |
| 25167 | 0 |
| 25168 | 0 |
| 25169 | 0 |
| 25170 | 0 |
| 25171 | 0 |
| 25172 | 0 |
| 25173 | 0 |
| 25174 | 0 |
| 25175 | 0 |
| 25176 | 0 |
| 25177 | 0 |
| 25178 | 0 |
| 25179 | 0 |
| 25180 | 0 |
| 25181 | 0 |
| 25182 | 0 |
| 25183 | 0 |
| 25184 | 0 |



|       |   |
|-------|---|
| 25185 | 0 |
| 25186 | 0 |
| 25187 | 0 |
| 25188 | 0 |
| 25189 | 0 |
| 25190 | 0 |
| 25191 | 0 |
| 25192 | 0 |
| 25193 | 0 |
| 25194 | 0 |
| 25195 | 0 |
| 25196 | 0 |
| 25197 | 0 |
| 25198 | 0 |
| 25199 | 0 |
| 25200 | 0 |
| 25201 | 0 |
| 25202 | 0 |
| 25203 | 0 |
| 25204 | 0 |
| 25205 | 0 |
| 25206 | 0 |
| 25207 | 0 |
| 25208 | 0 |
| 25209 | 0 |
| 25210 | 0 |
| 25211 | 0 |
| 25212 | 0 |
| 25213 | 0 |
| 25214 | 0 |
| 25215 | 0 |
| 25216 | 0 |
| 25217 | 0 |
| 25218 | 0 |
| 25219 | 0 |
| 25220 | 0 |
| 25221 | 0 |
| 25222 | 0 |
| 25223 | 0 |
| 25224 | 0 |
| 25225 | 0 |
| 25226 | 0 |
| 25227 | 0 |
| 25228 | 0 |
| 25229 | 0 |
| 25230 | 0 |
| 25231 | 0 |
| 25232 | 0 |
| 25233 | 0 |
| 25234 | 0 |

|       |   |
|-------|---|
| 25235 | 0 |
| 25236 | 0 |
| 25237 | 0 |
| 25238 | 0 |
| 25239 | 0 |
| 25240 | 0 |
| 25241 | 0 |
| 25242 | 0 |
| 25243 | 0 |
| 25244 | 0 |
| 25245 | 0 |
| 25246 | 0 |
| 25247 | 0 |
| 25248 | 0 |
| 25249 | 0 |
| 25250 | 0 |
| 25251 | 0 |
| 25252 | 0 |
| 25253 | 0 |
| 25254 | 0 |
| 25255 | 0 |
| 25256 | 0 |
| 25257 | 0 |
| 25258 | 0 |
| 25259 | 0 |
| 25260 | 0 |
| 25261 | 0 |
| 25262 | 0 |
| 25263 | 0 |
| 25264 | 0 |
| 25265 | 0 |
| 25266 | 0 |
| 25267 | 0 |
| 25268 | 0 |
| 25269 | 0 |
| 25270 | 0 |
| 25271 | 0 |
| 25272 | 0 |
| 25273 | 0 |
| 25274 | 0 |
| 25275 | 0 |
| 25276 | 0 |
| 25277 | 0 |
| 25278 | 0 |
| 25279 | 0 |
| 25280 | 0 |
| 25281 | 0 |
| 25282 | 0 |
| 25283 | 0 |
| 25284 | 0 |

|       |   |
|-------|---|
| 25285 | 0 |
| 25286 | 0 |
| 25287 | 0 |
| 25288 | 0 |
| 25289 | 0 |
| 25290 | 0 |
| 25291 | 0 |
| 25292 | 0 |
| 25293 | 0 |
| 25294 | 0 |
| 25295 | 0 |
| 25296 | 0 |
| 25297 | 0 |
| 25298 | 0 |
| 25299 | 0 |
| 25300 | 0 |
| 25301 | 0 |
| 25302 | 0 |
| 25303 | 0 |
| 25304 | 0 |
| 25305 | 0 |
| 25306 | 0 |
| 25307 | 0 |
| 25308 | 0 |
| 25309 | 0 |
| 25310 | 0 |
| 25311 | 0 |
| 25312 | 0 |
| 25313 | 0 |
| 25314 | 0 |
| 25315 | 0 |
| 25316 | 0 |
| 25317 | 0 |
| 25318 | 0 |
| 25319 | 0 |
| 25320 | 0 |
| 25321 | 0 |
| 25322 | 0 |
| 25323 | 0 |
| 25324 | 0 |
| 25325 | 0 |
| 25326 | 0 |
| 25327 | 0 |
| 25328 | 0 |
| 25329 | 0 |
| 25330 | 0 |
| 25331 | 0 |
| 25332 | 0 |
| 25333 | 0 |
| 25334 | 0 |

|       |   |
|-------|---|
| 25335 | 0 |
| 25336 | 0 |
| 25337 | 0 |
| 25338 | 0 |
| 25339 | 0 |
| 25340 | 0 |
| 25341 | 0 |
| 25342 | 0 |
| 25343 | 0 |
| 25344 | 0 |
| 25345 | 0 |
| 25346 | 0 |
| 25347 | 0 |
| 25348 | 0 |
| 25349 | 0 |
| 25350 | 0 |
| 25351 | 0 |
| 25352 | 0 |
| 25353 | 0 |
| 25354 | 0 |
| 25355 | 0 |
| 25356 | 0 |
| 25357 | 0 |
| 25358 | 0 |
| 25359 | 0 |
| 25360 | 0 |
| 25361 | 0 |
| 25362 | 0 |
| 25363 | 0 |
| 25364 | 0 |
| 25365 | 0 |
| 25366 | 0 |
| 25367 | 0 |
| 25368 | 0 |
| 25369 | 0 |
| 25370 | 0 |
| 25371 | 0 |
| 25372 | 0 |
| 25373 | 0 |
| 25374 | 0 |
| 25375 | 0 |
| 25376 | 0 |
| 25377 | 0 |
| 25378 | 0 |
| 25379 | 0 |
| 25380 | 0 |
| 25381 | 0 |
| 25382 | 0 |
| 25383 | 0 |
| 25384 | 0 |

|       |   |
|-------|---|
| 25385 | 0 |
| 25386 | 0 |
| 25387 | 0 |
| 25388 | 0 |
| 25389 | 0 |
| 25390 | 0 |
| 25391 | 0 |
| 25392 | 0 |
| 25393 | 0 |
| 25394 | 0 |
| 25395 | 0 |
| 25396 | 0 |
| 25397 | 0 |
| 25398 | 0 |
| 25399 | 0 |
| 25400 | 0 |
| 25401 | 0 |
| 25402 | 0 |
| 25403 | 0 |
| 25404 | 0 |
| 25405 | 0 |
| 25406 | 0 |
| 25407 | 0 |
| 25408 | 0 |
| 25409 | 0 |
| 25410 | 0 |
| 25411 | 0 |
| 25412 | 0 |
| 25413 | 0 |
| 25414 | 0 |
| 25415 | 0 |
| 25416 | 0 |
| 25417 | 0 |
| 25418 | 0 |
| 25419 | 0 |
| 25420 | 0 |
| 25421 | 0 |
| 25422 | 0 |
| 25423 | 0 |
| 25424 | 0 |
| 25425 | 0 |
| 25426 | 0 |
| 25427 | 0 |
| 25428 | 0 |
| 25429 | 0 |
| 25430 | 0 |
| 25431 | 0 |
| 25432 | 0 |
| 25433 | 0 |
| 25434 | 0 |

|       |   |
|-------|---|
| 25435 | 0 |
| 25436 | 0 |
| 25437 | 0 |
| 25438 | 0 |
| 25439 | 0 |
| 25440 | 0 |
| 25441 | 0 |
| 25442 | 0 |
| 25443 | 0 |
| 25444 | 0 |
| 25445 | 0 |
| 25446 | 0 |
| 25447 | 0 |
| 25448 | 0 |
| 25449 | 0 |
| 25450 | 0 |
| 25451 | 0 |
| 25452 | 0 |
| 25453 | 0 |
| 25454 | 0 |
| 25455 | 0 |
| 25456 | 0 |
| 25457 | 0 |
| 25458 | 0 |
| 25459 | 0 |
| 25460 | 0 |
| 25461 | 0 |
| 25462 | 0 |
| 25463 | 0 |
| 25464 | 0 |
| 25465 | 0 |
| 25466 | 0 |
| 25467 | 0 |
| 25468 | 0 |
| 25469 | 0 |
| 25470 | 0 |
| 25471 | 0 |
| 25472 | 0 |
| 25473 | 0 |
| 25474 | 0 |
| 25475 | 0 |
| 25476 | 0 |
| 25477 | 0 |
| 25478 | 0 |
| 25479 | 0 |
| 25480 | 0 |
| 25481 | 0 |
| 25482 | 0 |
| 25483 | 0 |
| 25484 | 0 |

|       |   |
|-------|---|
| 25485 | 0 |
| 25486 | 0 |
| 25487 | 0 |
| 25488 | 0 |
| 25489 | 0 |
| 25490 | 0 |
| 25491 | 0 |
| 25492 | 0 |
| 25493 | 0 |
| 25494 | 0 |
| 25495 | 0 |
| 25496 | 0 |
| 25497 | 0 |
| 25498 | 0 |
| 25499 | 0 |
| 25500 | 0 |
| 25501 | 0 |
| 25502 | 0 |
| 25503 | 0 |
| 25504 | 0 |
| 25505 | 0 |
| 25506 | 0 |
| 25507 | 0 |
| 25508 | 0 |
| 25509 | 0 |
| 25510 | 0 |
| 25511 | 0 |
| 25512 | 0 |
| 25513 | 0 |
| 25514 | 0 |
| 25515 | 0 |
| 25516 | 0 |
| 25517 | 0 |
| 25518 | 0 |
| 25519 | 0 |
| 25520 | 0 |
| 25521 | 0 |
| 25522 | 0 |
| 25523 | 0 |
| 25524 | 0 |
| 25525 | 0 |
| 25526 | 0 |
| 25527 | 0 |
| 25528 | 0 |
| 25529 | 0 |
| 25530 | 0 |
| 25531 | 0 |
| 25532 | 0 |
| 25533 | 0 |
| 25534 | 0 |

|       |   |
|-------|---|
| 25535 | 0 |
| 25536 | 0 |
| 25537 | 0 |
| 25538 | 0 |
| 25539 | 0 |
| 25540 | 0 |
| 25541 | 0 |
| 25542 | 0 |
| 25543 | 0 |
| 25544 | 0 |
| 25545 | 0 |
| 25546 | 0 |
| 25547 | 0 |
| 25548 | 0 |
| 25549 | 0 |
| 25550 | 0 |
| 25551 | 0 |
| 25552 | 0 |
| 25553 | 0 |
| 25554 | 0 |
| 25555 | 0 |
| 25556 | 0 |
| 25557 | 0 |
| 25558 | 0 |
| 25559 | 0 |
| 25560 | 0 |
| 25561 | 0 |
| 25562 | 0 |
| 25563 | 0 |
| 25564 | 0 |
| 25565 | 0 |
| 25566 | 0 |
| 25567 | 0 |
| 25568 | 0 |
| 25569 | 0 |
| 25570 | 0 |
| 25571 | 0 |
| 25572 | 0 |
| 25573 | 0 |
| 25574 | 0 |
| 25575 | 0 |
| 25576 | 0 |
| 25577 | 0 |
| 25578 | 0 |
| 25579 | 0 |
| 25580 | 0 |
| 25581 | 0 |
| 25582 | 0 |
| 25583 | 0 |
| 25584 | 0 |



|       |   |
|-------|---|
| 25585 | 0 |
| 25586 | 0 |
| 25587 | 0 |
| 25588 | 0 |
| 25589 | 0 |
| 25590 | 0 |
| 25591 | 0 |
| 25592 | 0 |
| 25593 | 0 |
| 25594 | 0 |
| 25595 | 0 |
| 25596 | 0 |
| 25597 | 0 |
| 25598 | 0 |
| 25599 | 0 |
| 25600 | 0 |
| 25601 | 0 |
| 25602 | 0 |
| 25603 | 0 |
| 25604 | 0 |
| 25605 | 0 |
| 25606 | 0 |
| 25607 | 0 |
| 25608 | 0 |
| 25609 | 0 |
| 25610 | 0 |
| 25611 | 0 |
| 25612 | 0 |
| 25613 | 0 |
| 25614 | 0 |
| 25615 | 0 |
| 25616 | 0 |
| 25617 | 0 |
| 25618 | 0 |
| 25619 | 0 |
| 25620 | 0 |
| 25621 | 0 |
| 25622 | 0 |
| 25623 | 0 |
| 25624 | 0 |
| 25625 | 0 |
| 25626 | 0 |
| 25627 | 0 |
| 25628 | 0 |
| 25629 | 0 |
| 25630 | 0 |
| 25631 | 0 |
| 25632 | 0 |
| 25633 | 0 |
| 25634 | 0 |

|       |   |
|-------|---|
| 25635 | 0 |
| 25636 | 0 |
| 25637 | 0 |
| 25638 | 0 |
| 25639 | 0 |
| 25640 | 0 |
| 25641 | 0 |
| 25642 | 0 |
| 25643 | 0 |
| 25644 | 0 |
| 25645 | 0 |
| 25646 | 0 |
| 25647 | 0 |
| 25648 | 0 |
| 25649 | 0 |
| 25650 | 0 |
| 25651 | 0 |
| 25652 | 0 |
| 25653 | 0 |
| 25654 | 0 |
| 25655 | 0 |
| 25656 | 0 |
| 25657 | 0 |
| 25658 | 0 |
| 25659 | 0 |
| 25660 | 0 |
| 25661 | 0 |
| 25662 | 0 |
| 25663 | 0 |
| 25664 | 0 |
| 25665 | 0 |
| 25666 | 0 |
| 25667 | 0 |
| 25668 | 0 |
| 25669 | 0 |
| 25670 | 0 |
| 25671 | 0 |
| 25672 | 0 |
| 25673 | 0 |
| 25674 | 0 |
| 25675 | 0 |
| 25676 | 0 |
| 25677 | 0 |
| 25678 | 0 |
| 25679 | 0 |
| 25680 | 0 |
| 25681 | 0 |
| 25682 | 0 |
| 25683 | 0 |
| 25684 | 0 |

|       |   |
|-------|---|
| 25685 | 0 |
| 25686 | 0 |
| 25687 | 0 |
| 25688 | 0 |
| 25689 | 0 |
| 25690 | 0 |
| 25691 | 0 |
| 25692 | 0 |
| 25693 | 0 |
| 25694 | 0 |
| 25695 | 0 |
| 25696 | 0 |
| 25697 | 0 |
| 25698 | 0 |
| 25699 | 0 |
| 25700 | 0 |
| 25701 | 0 |
| 25702 | 0 |
| 25703 | 0 |
| 25704 | 0 |
| 25705 | 0 |
| 25706 | 0 |
| 25707 | 0 |
| 25708 | 0 |
| 25709 | 0 |
| 25710 | 0 |
| 35582 | 0 |
| 35584 | 0 |
| 35586 | 0 |
| 35588 | 0 |
| 35591 | 0 |
| 35593 | 0 |
| 35595 | 0 |
| 35597 | 0 |
| 35602 | 0 |
| 35604 | 0 |
| 35606 | 0 |
| 35608 | 0 |
| 35610 | 0 |
| 35612 | 0 |
| 35614 | 0 |
| 35616 | 0 |
| 35620 | 0 |
| 35622 | 0 |
| 35624 | 0 |
| 35628 | 0 |
| 35629 | 0 |
| 35637 | 0 |
| 35655 | 0 |
| 35657 | 0 |

|       |   |
|-------|---|
| 35661 | 0 |
| 35662 | 0 |
| 35664 | 0 |
| 35666 | 0 |
| 35668 | 0 |
| 35671 | 0 |
| 35673 | 0 |
| 35676 | 0 |
| 35678 | 0 |
| 35680 | 0 |
| 35682 | 0 |
| 35684 | 0 |
| 35686 | 0 |
| 35688 | 0 |
| 35690 | 0 |
| 35692 | 0 |
| 35694 | 0 |
| 35696 | 0 |
| 35698 | 0 |
| 35700 | 0 |
| 35702 | 0 |
| 35704 | 0 |
| 35712 | 0 |
| 35714 | 0 |
| 35716 | 0 |
| 35718 | 0 |
| 35721 | 0 |
| 35724 | 0 |
| 35726 | 0 |
| 35728 | 0 |
| 35730 | 0 |
| 35732 | 0 |
| 35734 | 0 |
| 35737 | 0 |
| 35745 | 0 |
| 35748 | 0 |
| 35750 | 0 |
| 35753 | 0 |
| 35755 | 0 |
| 35757 | 0 |
| 35780 | 0 |
| 35849 | 0 |
| 35852 | 0 |
| 35854 | 0 |
| 35858 | 0 |
| 35860 | 0 |
| 35864 | 0 |
| 35868 | 0 |
| 35871 | 0 |
| 35874 | 0 |

|         |   |
|---------|---|
| 35877   | 0 |
| 35880   | 0 |
| 35883   | 0 |
| 35937   | 0 |
| 35987   | 0 |
| 36755   | 0 |
| 36758   | 0 |
| 36764   | 0 |
| 36773   | 0 |
| 36775   | 0 |
| 36778   | 0 |
| 36782   | 0 |
| 36784   | 0 |
| 36801   | 0 |
| 36804   | 0 |
| 36807   | 0 |
| 36811   | 0 |
| 36814   | 0 |
| 36817   | 0 |
| 36820   | 0 |
| 36823   | 0 |
| 36826   | 0 |
| 36829   | 0 |
| 36832   | 0 |
| 36835   | 0 |
| 36838   | 0 |
| 36841   | 0 |
| 36844   | 0 |
| 36847   | 0 |
| 36850   | 0 |
| 36853   | 0 |
| 36856   | 0 |
| 36859   | 0 |
| 36862   | 0 |
| 36865   | 0 |
| 36868   | 0 |
| 36871   | 0 |
| 36874   | 0 |
| 36877   | 0 |
| 35478-B | 0 |
| 35481-B | 0 |
| 35487-B | 0 |
| 35490-B | 0 |
| 35496-B | 0 |
| PS2     | 0 |
| PS3     | 0 |

[QUALITY]

;Node

InitQual

|           |      |         |         |
|-----------|------|---------|---------|
| [SOURCES] |      |         |         |
| ;Node     | Type | Quality | Pattern |

|             |           |             |
|-------------|-----------|-------------|
| [REACTIONS] |           |             |
| ;Type       | Pipe/Tank | Coefficient |

|                       |   |
|-----------------------|---|
| [REACTIONS]           |   |
| Order Bulk            | 1 |
| Order Tank            | 1 |
| Order Wall            | 1 |
| Global Bulk           | 0 |
| Global Wall           | 0 |
| Limiting Potential    | 0 |
| Roughness Correlation | 0 |

|          |       |
|----------|-------|
| [MIXING] |       |
| ;Tank    | Model |

|                    |       |
|--------------------|-------|
| [TIMES]            |       |
| Duration           | 23:00 |
| Hydraulic Timestep | 1:00  |
| Quality Timestep   | 0:00  |
| Pattern Timestep   | 1:00  |
| Pattern Start      | 0:00  |
| Report Timestep    | 1:00  |
| Report Start       | 0:00  |
| Start ClockTime    | 0     |
| Statistic          | NONE  |

|          |    |
|----------|----|
| [REPORT] |    |
| Status   | No |
| Summary  | No |
| Page     | 0  |

|                   |             |
|-------------------|-------------|
| [OPTIONS]         |             |
| Units             | LPS         |
| Headloss          | H-W         |
| Specific Gravity  | 0.998       |
| Viscosity         | 1           |
| Trials            | 40          |
| Accuracy          | 0.001       |
| CHECKFREQ         | 2           |
| MAXCHECK          | 10          |
| DAMPLIMIT         | 0           |
| Unbalanced        | Continue 10 |
| Pattern           | 3           |
| Demand Multiplier | 1           |
| Emitter Exponent  | 0.5         |
| Quality           | NONE mg/L   |

Diffusivity 1  
Tolerance 0.01

[COORDINATES]

| ;Node | X-Coord   | Y-Coord    |
|-------|-----------|------------|
| 18463 | 295629.46 | 6126486.83 |
| 18464 | 295630.43 | 6126480.40 |
| 18465 | 294559.29 | 6127863.33 |
| 18466 | 294501.32 | 6127861.60 |
| 18467 | 295109.89 | 6125051.32 |
| 18468 | 295159.88 | 6125051.45 |
| 18469 | 295110.01 | 6125014.33 |
| 18470 | 295160.00 | 6125014.46 |
| 18471 | 294843.62 | 6126132.33 |
| 18472 | 294846.71 | 6126096.79 |
| 18473 | 294835.85 | 6125994.16 |
| 18474 | 294881.87 | 6125993.18 |
| 18475 | 297678.28 | 6127175.94 |
| 18476 | 297674.76 | 6127156.26 |
| 18477 | 297673.31 | 6127147.38 |
| 18478 | 297679.15 | 6127385.22 |
| 18479 | 297710.51 | 6127379.74 |
| 18480 | 294236.62 | 6126082.96 |
| 18481 | 294236.06 | 6126081.04 |
| 18482 | 294249.26 | 6126167.34 |
| 18483 | 294251.20 | 6126166.85 |
| 18484 | 294336.74 | 6125944.81 |
| 18485 | 294334.79 | 6125945.25 |
| 18486 | 294325.76 | 6124659.59 |
| 18487 | 294327.65 | 6124658.91 |
| 18488 | 294407.71 | 6124840.79 |
| 18489 | 294407.06 | 6124838.90 |
| 18490 | 294408.39 | 6124842.67 |
| 18491 | 294274.26 | 6125551.50 |
| 18492 | 294276.15 | 6125550.85 |
| 18493 | 294502.42 | 6125432.22 |
| 18494 | 294500.56 | 6125432.93 |
| 18495 | 294241.33 | 6125491.33 |
| 18496 | 294243.21 | 6125490.65 |
| 18497 | 297347.94 | 6127185.06 |
| 18498 | 297349.94 | 6127185.22 |
| 18499 | 297343.89 | 6127235.90 |
| 18500 | 297345.88 | 6127236.03 |
| 18501 | 297340.42 | 6127285.78 |
| 18502 | 297342.42 | 6127285.89 |
| 18503 | 297351.76 | 6127134.38 |
| 18504 | 297353.75 | 6127134.53 |
| 18505 | 297356.07 | 6127077.11 |
| 18506 | 297358.07 | 6127077.27 |
| 18507 | 297358.83 | 6127044.10 |

|       |           |            |
|-------|-----------|------------|
| 18508 | 297360.82 | 6127044.26 |
| 18509 | 297419.75 | 6126775.18 |
| 18510 | 297419.90 | 6126773.18 |
| 18511 | 297343.48 | 6126511.52 |
| 18512 | 297343.84 | 6126509.55 |
| 18513 | 297372.97 | 6126517.02 |
| 18514 | 297373.41 | 6126515.07 |
| 18515 | 294141.36 | 6127660.21 |
| 18516 | 294151.24 | 6127655.83 |
| 18517 | 294336.08 | 6126642.29 |
| 18518 | 294328.19 | 6126643.72 |
| 18519 | 295611.33 | 6127475.33 |
| 18520 | 295605.28 | 6127519.85 |
| 18521 | 296698.02 | 6126144.94 |
| 18522 | 296567.17 | 6126145.49 |
| 18523 | 294215.18 | 6127336.59 |
| 18524 | 294370.94 | 6127321.00 |
| 18525 | 298497.12 | 6127818.97 |
| 18526 | 298499.07 | 6127818.53 |
| 18527 | 298662.41 | 6127780.99 |
| 18528 | 298660.46 | 6127781.44 |
| 18529 | 296212.03 | 6125390.25 |
| 18530 | 296212.26 | 6125388.26 |
| 18531 | 296211.79 | 6125392.23 |
| 18532 | 295524.20 | 6126338.34 |
| 18533 | 295523.92 | 6126340.32 |
| 18534 | 295522.22 | 6126338.08 |
| 18535 | 296662.82 | 6126494.94 |
| 18536 | 296660.83 | 6126494.70 |
| 18537 | 296663.28 | 6126492.99 |
| 18538 | 295215.24 | 6127301.65 |
| 18539 | 295272.65 | 6127293.42 |
| 18540 | 295157.31 | 6127657.85 |
| 18541 | 295157.26 | 6127667.85 |
| 18542 | 295156.86 | 6127646.65 |
| 18543 | 295147.13 | 6127454.29 |
| 18544 | 295154.37 | 6127601.08 |
| 18545 | 295221.96 | 6127407.46 |
| 18546 | 295228.77 | 6127406.87 |
| 18547 | 295289.18 | 6127495.17 |
| 18548 | 295281.61 | 6127402.29 |
| 18549 | 295293.79 | 6127551.75 |
| 18550 | 297999.94 | 6127318.41 |
| 18551 | 297938.04 | 6127329.98 |
| 18552 | 295840.69 | 6127447.24 |
| 18553 | 295844.24 | 6127505.11 |
| 18554 | 295862.03 | 6127613.27 |
| 18555 | 295865.11 | 6127654.60 |
| 18556 | 296734.56 | 6128842.67 |
| 18557 | 296818.92 | 6128821.03 |



|       |           |            |
|-------|-----------|------------|
| 18558 | 296828.84 | 6128862.49 |
| 18559 | 296820.85 | 6128820.53 |
| 18560 | 298284.46 | 6129037.38 |
| 18561 | 298251.05 | 6129043.69 |
| 18562 | 296556.97 | 6128932.84 |
| 18563 | 296528.40 | 6128819.92 |
| 18564 | 297796.19 | 6126734.42 |
| 18565 | 297789.82 | 6126698.56 |
| 18566 | 297823.79 | 6126729.70 |
| 18567 | 298133.51 | 6128976.35 |
| 18568 | 298101.09 | 6128982.48 |
| 18569 | 298094.61 | 6129131.26 |
| 18570 | 298108.33 | 6129203.89 |
| 18571 | 293163.09 | 6126824.94 |
| 18572 | 293161.89 | 6126853.00 |
| 18573 | 295805.47 | 6126129.45 |
| 18574 | 295803.48 | 6126129.17 |
| 18575 | 296663.52 | 6127741.70 |
| 18576 | 296657.61 | 6127694.07 |
| 18577 | 294117.02 | 6126361.85 |
| 18578 | 294110.00 | 6126332.86 |
| 18579 | 293492.08 | 6127103.52 |
| 18580 | 293490.97 | 6127085.27 |
| 18581 | 293176.88 | 6127278.70 |
| 18582 | 293178.95 | 6127237.66 |
| 18583 | 293188.14 | 6127067.17 |
| 18584 | 293190.08 | 6127033.33 |
| 18585 | 293191.47 | 6127009.15 |
| 18586 | 293196.12 | 6126895.94 |
| 18587 | 293197.41 | 6126872.20 |
| 18588 | 293352.29 | 6127078.02 |
| 18589 | 293332.88 | 6127043.28 |
| 18590 | 293494.92 | 6126983.18 |
| 18591 | 293452.60 | 6126985.21 |
| 18592 | 295855.69 | 6126687.93 |
| 18593 | 295815.33 | 6126683.19 |
| 18594 | 294368.63 | 6127395.30 |
| 18595 | 294402.13 | 6127392.22 |
| 18596 | 294093.02 | 6127179.99 |
| 18597 | 293986.73 | 6127191.87 |
| 18598 | 294622.91 | 6125152.04 |
| 18599 | 294607.10 | 6125099.62 |
| 18600 | 293577.95 | 6127488.93 |
| 18601 | 293549.00 | 6127435.29 |
| 18602 | 293725.44 | 6125057.00 |
| 18603 | 293733.56 | 6125071.58 |
| 18604 | 294026.19 | 6125157.65 |
| 18605 | 293989.08 | 6125081.93 |
| 18606 | 294027.19 | 6125159.38 |
| 18607 | 293996.36 | 6125175.80 |

|       |           |            |
|-------|-----------|------------|
| 18608 | 293794.66 | 6125325.10 |
| 18609 | 293777.99 | 6125294.33 |
| 18610 | 293631.32 | 6125375.17 |
| 18611 | 293640.48 | 6125370.55 |
| 18612 | 294294.19 | 6126869.32 |
| 18613 | 294293.02 | 6126858.29 |
| 18614 | 298131.49 | 6127927.33 |
| 18615 | 298130.53 | 6127925.58 |
| 18616 | 297637.88 | 6126950.72 |
| 18617 | 297638.24 | 6126952.69 |
| 18618 | 297637.51 | 6126948.75 |
| 18619 | 297634.26 | 6126931.15 |
| 18620 | 297636.23 | 6126930.80 |
| 18621 | 297675.60 | 6126923.76 |
| 18622 | 297675.96 | 6126925.73 |
| 18623 | 297673.64 | 6126924.11 |
| 18624 | 297648.11 | 6127005.64 |
| 18625 | 297646.14 | 6127005.99 |
| 18626 | 297650.08 | 6127005.30 |
| 18627 | 294085.08 | 6127669.35 |
| 18628 | 294085.22 | 6127667.35 |
| 18629 | 294032.96 | 6127677.75 |
| 18630 | 294033.12 | 6127675.76 |
| 18631 | 295471.79 | 6126708.79 |
| 18632 | 295487.57 | 6126592.88 |
| 18633 | 295986.10 | 6127888.00 |
| 18634 | 295985.72 | 6127897.86 |
| 18635 | 294732.32 | 6125998.39 |
| 18636 | 294746.97 | 6125997.86 |
| 18637 | 295339.04 | 6125654.59 |
| 18638 | 295373.30 | 6125659.01 |
| 18639 | 295297.05 | 6125500.25 |
| 18640 | 295368.32 | 6125510.09 |
| 18641 | 295333.32 | 6125939.86 |
| 18642 | 295455.43 | 6125955.82 |
| 18643 | 295283.09 | 6126442.80 |
| 18644 | 295485.34 | 6126470.39 |
| 18645 | 298312.34 | 6127575.62 |
| 18646 | 298307.68 | 6127577.42 |
| 18647 | 295333.70 | 6125863.01 |
| 18648 | 295293.89 | 6125859.11 |
| 18649 | 295324.72 | 6125933.43 |
| 18650 | 295331.87 | 6125934.27 |
| 18651 | 294699.28 | 6125673.41 |
| 18652 | 294606.77 | 6125663.88 |
| 18653 | 294731.21 | 6125617.71 |
| 18654 | 294741.95 | 6125513.27 |
| 18655 | 297188.19 | 6126896.16 |
| 18656 | 297184.24 | 6126895.89 |
| 18657 | 297193.24 | 6126836.35 |

|       |           |            |
|-------|-----------|------------|
| 18658 | 297135.46 | 6126831.26 |
| 18659 | 295047.45 | 6127262.87 |
| 18660 | 295138.23 | 6127254.50 |
| 18661 | 295041.65 | 6127220.56 |
| 18662 | 295061.60 | 6127045.37 |
| 18663 | 295018.89 | 6126694.66 |
| 18664 | 295102.28 | 6126704.48 |
| 18665 | 295153.44 | 6126290.33 |
| 18666 | 295032.60 | 6126274.23 |
| 18667 | 295017.10 | 6126409.22 |
| 18668 | 298924.56 | 6127979.33 |
| 18669 | 298914.47 | 6127936.29 |
| 18670 | 298890.56 | 6128099.59 |
| 18671 | 298955.14 | 6128086.03 |
| 18672 | 295163.88 | 6125022.36 |
| 18673 | 295245.26 | 6125017.94 |
| 18674 | 295162.01 | 6124977.46 |
| 18675 | 295162.00 | 6125014.46 |
| 18676 | 293693.10 | 6127169.61 |
| 18677 | 293686.13 | 6127206.96 |
| 18678 | 293875.80 | 6127203.73 |
| 18679 | 293685.01 | 6127212.47 |
| 18680 | 295596.40 | 6127873.08 |
| 18681 | 295602.71 | 6127940.78 |
| 18682 | 295599.21 | 6124988.90 |
| 18683 | 295665.15 | 6124986.16 |
| 18684 | 295608.16 | 6125074.39 |
| 18685 | 295668.02 | 6125070.90 |
| 18686 | 295537.53 | 6124991.45 |
| 18687 | 295540.23 | 6125074.41 |
| 18688 | 296183.80 | 6125751.09 |
| 18689 | 296218.94 | 6125502.58 |
| 18690 | 294309.87 | 6126928.60 |
| 18691 | 294300.68 | 6126893.80 |
| 18692 | 293846.24 | 6125124.32 |
| 18693 | 293814.59 | 6125141.47 |
| 18694 | 293565.30 | 6127607.93 |
| 18695 | 293560.77 | 6127614.01 |
| 18696 | 293652.17 | 6127554.05 |
| 18697 | 293643.85 | 6127546.99 |
| 18698 | 295672.98 | 6127371.69 |
| 18699 | 295679.88 | 6127371.17 |
| 18700 | 295611.60 | 6127473.35 |
| 18701 | 295650.91 | 6127469.77 |
| 18702 | 295558.11 | 6127479.27 |
| 18703 | 295552.82 | 6127522.31 |
| 18704 | 294181.21 | 6127475.11 |
| 18705 | 294213.20 | 6127475.12 |
| 18706 | 295745.68 | 6125032.38 |
| 18707 | 295747.12 | 6125071.35 |

|       |           |            |
|-------|-----------|------------|
| 18708 | 297693.33 | 6126832.54 |
| 18709 | 297700.28 | 6126868.22 |
| 18710 | 293685.96 | 6125440.50 |
| 18711 | 293646.58 | 6125369.72 |
| 18712 | 293448.72 | 6125110.11 |
| 18713 | 293476.70 | 6125094.64 |
| 18714 | 295023.59 | 6126397.97 |
| 18715 | 295018.63 | 6126397.35 |
| 18716 | 295001.71 | 6126384.39 |
| 18717 | 294989.77 | 6126383.18 |
| 18718 | 294999.40 | 6126532.43 |
| 18719 | 295007.28 | 6126443.79 |
| 18720 | 294967.47 | 6126439.75 |
| 18721 | 295005.29 | 6126443.59 |
| 18722 | 294830.15 | 6126565.29 |
| 18723 | 294820.41 | 6126664.26 |
| 18724 | 294204.96 | 6125973.93 |
| 18725 | 294206.89 | 6125973.41 |
| 18726 | 293968.13 | 6127525.56 |
| 18727 | 293970.13 | 6127525.62 |
| 18728 | 295747.15 | 6128409.86 |
| 18729 | 295747.05 | 6128407.86 |
| 18730 | 295981.10 | 6128592.93 |
| 18731 | 295979.10 | 6128593.02 |
| 18732 | 295018.66 | 6126696.65 |
| 18733 | 293629.66 | 6126880.67 |
| 18734 | 293629.41 | 6126878.69 |
| 18735 | 293692.17 | 6127137.36 |
| 18736 | 293692.58 | 6127135.41 |
| 18737 | 294023.63 | 6125660.13 |
| 18738 | 294022.71 | 6125658.35 |
| 18739 | 293806.70 | 6125548.86 |
| 18740 | 293808.46 | 6125547.90 |
| 18741 | 294491.06 | 6125246.51 |
| 18742 | 294492.96 | 6125245.87 |
| 18743 | 293813.62 | 6125139.72 |
| 18744 | 293912.17 | 6125222.96 |
| 18745 | 293913.12 | 6125224.72 |
| 18746 | 293954.11 | 6125199.61 |
| 18747 | 293953.14 | 6125197.86 |
| 18748 | 295276.80 | 6126711.07 |
| 18749 | 295363.27 | 6126720.19 |
| 18750 | 295375.83 | 6127586.08 |
| 18751 | 295251.00 | 6127597.49 |
| 18752 | 295381.47 | 6127646.42 |
| 18753 | 295258.61 | 6127657.64 |
| 18754 | 295375.13 | 6127521.88 |
| 18755 | 295327.28 | 6127529.25 |
| 18756 | 295384.00 | 6127461.31 |
| 18757 | 295322.47 | 6127468.76 |

|       |           |            |
|-------|-----------|------------|
| 18758 | 295329.31 | 6127935.44 |
| 18759 | 295372.47 | 6127896.70 |
| 18760 | 298060.36 | 6127946.29 |
| 18761 | 298096.26 | 6127981.09 |
| 18762 | 296085.26 | 6126050.74 |
| 18763 | 296086.69 | 6126038.93 |
| 18764 | 297962.39 | 6127747.28 |
| 18765 | 297988.11 | 6127787.80 |
| 18766 | 295613.99 | 6125693.55 |
| 18767 | 295494.15 | 6125675.71 |
| 18768 | 295381.40 | 6125400.27 |
| 18769 | 295430.80 | 6125149.84 |
| 18770 | 295428.03 | 6125081.90 |
| 18771 | 295479.70 | 6125148.08 |
| 18772 | 295475.98 | 6125080.19 |
| 18773 | 294406.67 | 6125004.63 |
| 18774 | 294404.04 | 6124997.51 |
| 18775 | 294390.12 | 6125401.17 |
| 18776 | 294378.71 | 6125405.04 |
| 18777 | 294413.01 | 6125393.30 |
| 18778 | 294324.70 | 6125650.47 |
| 18779 | 294372.59 | 6125632.49 |
| 18780 | 294292.89 | 6125585.27 |
| 18781 | 294407.14 | 6125543.47 |
| 18782 | 295999.24 | 6127836.55 |
| 18783 | 295998.83 | 6127827.43 |
| 18784 | 294218.42 | 6126021.03 |
| 18785 | 294212.85 | 6126001.83 |
| 18786 | 295888.12 | 6127071.08 |
| 18787 | 295964.01 | 6127065.53 |
| 18788 | 295947.36 | 6127439.16 |
| 18789 | 295969.03 | 6127671.66 |
| 18790 | 293381.25 | 6127078.17 |
| 18791 | 293418.07 | 6127075.62 |
| 18792 | 293455.96 | 6127073.07 |
| 18793 | 293417.99 | 6127073.62 |
| 18794 | 293414.55 | 6126988.61 |
| 18795 | 293455.89 | 6127071.07 |
| 18796 | 293452.67 | 6126987.20 |
| 18797 | 293487.57 | 6127071.67 |
| 18798 | 295388.98 | 6125194.08 |
| 18799 | 295388.86 | 6125195.76 |
| 18800 | 294106.17 | 6126878.89 |
| 18801 | 293926.40 | 6126900.16 |
| 18802 | 293492.38 | 6127146.74 |
| 18803 | 293409.75 | 6127150.26 |
| 18804 | 293346.78 | 6127271.60 |
| 18805 | 293326.09 | 6127238.49 |
| 18806 | 293413.53 | 6127185.02 |
| 18807 | 293327.80 | 6127237.44 |

|       |           |            |
|-------|-----------|------------|
| 18808 | 293721.24 | 6125192.40 |
| 18809 | 293703.42 | 6125160.66 |
| 18810 | 293753.71 | 6125174.68 |
| 18811 | 294280.12 | 6127468.92 |
| 18812 | 294253.57 | 6127472.22 |
| 18813 | 294246.33 | 6127587.14 |
| 18814 | 294279.24 | 6127587.20 |
| 18815 | 294281.30 | 6127408.93 |
| 18816 | 294231.43 | 6127412.52 |
| 18817 | 294280.91 | 6127442.14 |
| 18818 | 294230.98 | 6127444.79 |
| 18820 | 295712.17 | 6125073.10 |
| 18821 | 295710.73 | 6125034.13 |
| 18822 | 295960.38 | 6125154.62 |
| 18823 | 295956.69 | 6125076.71 |
| 18824 | 294459.07 | 6124984.90 |
| 18825 | 293767.89 | 6125057.61 |
| 18826 | 293754.67 | 6124943.03 |
| 18827 | 293748.23 | 6124946.60 |
| 18828 | 293994.95 | 6125274.15 |
| 18829 | 294279.02 | 6127594.81 |
| 18830 | 294278.96 | 6127596.81 |
| 18831 | 294278.90 | 6127598.81 |
| 18832 | 294448.07 | 6126631.01 |
| 18833 | 294448.60 | 6126633.12 |
| 18834 | 298233.63 | 6127790.33 |
| 18835 | 298231.79 | 6127791.04 |
| 18836 | 296865.55 | 6128236.57 |
| 18837 | 296865.36 | 6128234.58 |
| 18838 | 296745.25 | 6126468.18 |
| 18839 | 296747.20 | 6126468.62 |
| 18840 | 296640.79 | 6125940.96 |
| 18841 | 296638.80 | 6125940.84 |
| 18842 | 296642.79 | 6125941.01 |
| 18843 | 295599.26 | 6124990.90 |
| 18844 | 295602.15 | 6125072.51 |
| 18845 | 295537.45 | 6124989.45 |
| 18846 | 295535.89 | 6124946.83 |
| 18847 | 295427.93 | 6125079.91 |
| 18848 | 295475.88 | 6125078.19 |
| 18849 | 298824.49 | 6127810.97 |
| 18850 | 298828.19 | 6127810.21 |
| 18851 | 294605.70 | 6127081.15 |
| 18852 | 294605.90 | 6127083.14 |
| 18853 | 296017.14 | 6125210.42 |
| 18854 | 296017.04 | 6125208.42 |
| 18855 | 296017.21 | 6125211.66 |
| 18856 | 293683.75 | 6126741.35 |
| 18857 | 293685.73 | 6126741.08 |
| 18858 | 294773.30 | 6127517.80 |

|       |           |            |
|-------|-----------|------------|
| 18859 | 294771.30 | 6127517.87 |
| 18860 | 294898.63 | 6124948.20 |
| 18861 | 294899.30 | 6124950.08 |
| 18862 | 295382.09 | 6127651.46 |
| 18863 | 295382.82 | 6127657.38 |
| 18864 | 295381.20 | 6127480.41 |
| 18865 | 296779.03 | 6126115.50 |
| 18866 | 296864.95 | 6126152.81 |
| 18867 | 296427.25 | 6126077.45 |
| 18868 | 296419.51 | 6126077.68 |
| 18869 | 296428.07 | 6126390.50 |
| 18870 | 296362.23 | 6126383.40 |
| 18871 | 296358.62 | 6126319.32 |
| 18872 | 296474.66 | 6126220.05 |
| 18873 | 295841.20 | 6127024.97 |
| 18874 | 295884.92 | 6127022.13 |
| 18875 | 294681.18 | 6124860.37 |
| 18876 | 294722.32 | 6124846.20 |
| 18877 | 293812.58 | 6125559.31 |
| 18878 | 293853.73 | 6125633.68 |
| 18879 | 293845.03 | 6125528.15 |
| 18880 | 294324.00 | 6127008.49 |
| 18881 | 293945.69 | 6127051.96 |
| 18882 | 293775.79 | 6126863.84 |
| 18883 | 293812.41 | 6126859.40 |
| 18884 | 293734.53 | 6125073.33 |
| 18885 | 293726.59 | 6125077.56 |
| 18886 | 294137.56 | 6127661.32 |
| 18887 | 295652.67 | 6127514.04 |
| 18888 | 295650.99 | 6127471.77 |
| 18889 | 295692.81 | 6127466.71 |
| 18890 | 294257.82 | 6127705.85 |
| 18891 | 294262.27 | 6127750.62 |
| 18892 | 298359.89 | 6129081.12 |
| 18893 | 298360.27 | 6129083.09 |
| 18894 | 298327.47 | 6129087.25 |
| 18895 | 298329.44 | 6129086.88 |
| 18896 | 295714.77 | 6127899.32 |
| 18897 | 295714.96 | 6127901.31 |
| 18898 | 295762.52 | 6127902.93 |
| 18899 | 295762.39 | 6127900.94 |
| 18900 | 295762.66 | 6127904.93 |
| 18901 | 295848.12 | 6127553.99 |
| 18902 | 295846.13 | 6127554.14 |
| 18903 | 295851.74 | 6127602.82 |
| 18904 | 295853.73 | 6127602.67 |
| 18905 | 294970.55 | 6124867.38 |
| 18906 | 294937.40 | 6124772.72 |
| 18907 | 294339.73 | 6125673.22 |
| 18908 | 294519.35 | 6125604.09 |

|       |           |            |
|-------|-----------|------------|
| 18909 | 294260.69 | 6126205.65 |
| 18910 | 294310.09 | 6126193.87 |
| 18911 | 294097.31 | 6125992.09 |
| 18912 | 294066.71 | 6126009.24 |
| 18913 | 295628.28 | 6125612.78 |
| 18914 | 295637.31 | 6125547.41 |
| 18915 | 295638.90 | 6125535.48 |
| 18916 | 295650.92 | 6125415.00 |
| 18917 | 295660.70 | 6125416.08 |
| 18918 | 295606.88 | 6125830.60 |
| 18919 | 295729.22 | 6125846.50 |
| 18920 | 295597.60 | 6125829.30 |
| 18921 | 295604.90 | 6125830.32 |
| 18922 | 295425.12 | 6124995.67 |
| 18923 | 295473.07 | 6124993.63 |
| 18924 | 293621.76 | 6126581.21 |
| 18925 | 293661.77 | 6126575.88 |
| 18926 | 293581.27 | 6126586.61 |
| 18927 | 293546.14 | 6126591.29 |
| 18928 | 293541.65 | 6126557.58 |
| 18929 | 293538.30 | 6126534.01 |
| 18930 | 298801.89 | 6128850.03 |
| 18931 | 298838.74 | 6128843.07 |
| 18932 | 296549.24 | 6127425.62 |
| 18933 | 296545.65 | 6127427.87 |
| 18934 | 295038.46 | 6128549.46 |
| 18935 | 294990.90 | 6128557.52 |
| 18936 | 294976.07 | 6128560.06 |
| 18937 | 298696.76 | 6127711.89 |
| 18938 | 298673.08 | 6127636.93 |
| 18939 | 298747.19 | 6127697.05 |
| 18940 | 298731.05 | 6127638.11 |
| 18941 | 294924.76 | 6127518.93 |
| 18942 | 294930.41 | 6127572.64 |
| 18943 | 294904.48 | 6127516.81 |
| 18944 | 294900.89 | 6127471.95 |
| 18945 | 294904.64 | 6127518.80 |
| 18946 | 294924.56 | 6127516.95 |
| 18947 | 294870.47 | 6127523.15 |
| 18948 | 294877.94 | 6127579.66 |
| 18949 | 298360.18 | 6127680.72 |
| 18950 | 298391.67 | 6127758.59 |
| 18951 | 298415.09 | 6127659.17 |
| 18952 | 298445.00 | 6127737.66 |
| 18953 | 298462.21 | 6127640.50 |
| 18954 | 298424.17 | 6127654.78 |
| 18955 | 298495.76 | 6127627.92 |
| 18956 | 297385.65 | 6128070.72 |
| 18957 | 297402.51 | 6128069.32 |
| 18958 | 297317.09 | 6128271.81 |



|       |           |            |
|-------|-----------|------------|
| 18959 | 297354.95 | 6128262.81 |
| 18960 | 297311.16 | 6128273.22 |
| 18961 | 295594.29 | 6126742.19 |
| 18962 | 295594.65 | 6126740.22 |
| 18963 | 295594.01 | 6126744.17 |
| 18964 | 295407.39 | 6126328.64 |
| 18965 | 295407.13 | 6126330.62 |
| 18966 | 295033.26 | 6124971.94 |
| 18967 | 295031.26 | 6124971.94 |
| 18968 | 295033.21 | 6124973.94 |
| 18969 | 294971.17 | 6125072.47 |
| 18970 | 294971.38 | 6125070.48 |
| 18971 | 294970.97 | 6125074.45 |
| 18972 | 295030.35 | 6125002.63 |
| 18973 | 295028.36 | 6125002.45 |
| 18974 | 295030.64 | 6125000.65 |
| 18975 | 294897.46 | 6125065.53 |
| 18976 | 294897.21 | 6125067.51 |
| 18977 | 294897.70 | 6125063.54 |
| 18978 | 296434.25 | 6128205.91 |
| 18979 | 296433.95 | 6128203.93 |
| 18980 | 296511.88 | 6126637.36 |
| 18981 | 296509.93 | 6126636.95 |
| 18982 | 296523.56 | 6126565.08 |
| 18983 | 296521.60 | 6126564.65 |
| 18984 | 296606.25 | 6126487.96 |
| 18985 | 296608.24 | 6126488.20 |
| 18986 | 298326.77 | 6128024.57 |
| 18987 | 298325.10 | 6128025.66 |
| 18988 | 296962.47 | 6128710.33 |
| 18989 | 296962.88 | 6128712.29 |
| 18990 | 296923.37 | 6128718.75 |
| 18991 | 296923.79 | 6128720.71 |
| 18992 | 296884.27 | 6128727.17 |
| 18993 | 296884.69 | 6128729.13 |
| 18994 | 295033.34 | 6127245.93 |
| 18995 | 295035.33 | 6127245.76 |
| 18996 | 295031.35 | 6127246.11 |
| 18997 | 294769.51 | 6125774.52 |
| 18998 | 294767.52 | 6125774.28 |
| 18999 | 294757.44 | 6125887.36 |
| 19000 | 294755.46 | 6125887.14 |
| 19001 | 298243.75 | 6127602.26 |
| 19002 | 298243.03 | 6127600.39 |
| 19003 | 298205.60 | 6127740.82 |
| 19004 | 298204.52 | 6127739.14 |
| 19005 | 297765.43 | 6127552.39 |
| 19006 | 297763.65 | 6127553.32 |
| 19007 | 298089.66 | 6127560.73 |
| 19008 | 298088.63 | 6127559.02 |

|       |           |            |
|-------|-----------|------------|
| 19009 | 298090.68 | 6127562.45 |
| 19010 | 298255.03 | 6127821.46 |
| 19011 | 298256.91 | 6127820.77 |
| 19012 | 298287.95 | 6127585.07 |
| 19013 | 298287.22 | 6127583.21 |
| 19014 | 298178.06 | 6128033.59 |
| 19015 | 298179.59 | 6128032.29 |
| 19016 | 298206.51 | 6128054.76 |
| 19017 | 298208.17 | 6128053.64 |
| 19018 | 295951.66 | 6127205.65 |
| 19019 | 295951.86 | 6127203.66 |
| 19020 | 295268.40 | 6126567.92 |
| 19021 | 295268.59 | 6126565.92 |
| 19022 | 295401.66 | 6128282.42 |
| 19023 | 295402.01 | 6128284.39 |
| 19024 | 298315.95 | 6127574.22 |
| 19025 | 298315.23 | 6127572.35 |
| 19026 | 297354.48 | 6128260.86 |
| 19027 | 295431.55 | 6126082.01 |
| 19028 | 295433.54 | 6126082.17 |
| 19029 | 296712.22 | 6128892.68 |
| 19030 | 296711.72 | 6128890.74 |
| 19031 | 296590.57 | 6128924.40 |
| 19032 | 296590.07 | 6128922.46 |
| 19033 | 295740.69 | 6127016.17 |
| 19034 | 295738.70 | 6127016.32 |
| 19035 | 295742.69 | 6127016.04 |
| 19036 | 295755.74 | 6126494.10 |
| 19037 | 295756.03 | 6126492.12 |
| 19038 | 295755.37 | 6126496.07 |
| 19039 | 295630.73 | 6126478.43 |
| 19040 | 294744.04 | 6125213.73 |
| 19041 | 294742.13 | 6125214.34 |
| 19042 | 294633.74 | 6125248.92 |
| 19043 | 294635.65 | 6125248.31 |
| 19044 | 294673.75 | 6125346.80 |
| 19045 | 294675.65 | 6125346.16 |
| 19046 | 294778.25 | 6125311.51 |
| 19047 | 294776.35 | 6125312.15 |
| 19048 | 294659.74 | 6125306.54 |
| 19049 | 294661.64 | 6125305.91 |
| 19050 | 294781.90 | 6125670.91 |
| 19051 | 294783.89 | 6125671.16 |
| 19052 | 294787.55 | 6125626.87 |
| 19053 | 294785.56 | 6125626.62 |
| 19054 | 293954.73 | 6127155.28 |
| 19055 | 293956.72 | 6127155.06 |
| 19056 | 294140.33 | 6127421.61 |
| 19057 | 294138.33 | 6127421.54 |
| 19058 | 293880.23 | 6127128.22 |

|       |           |            |
|-------|-----------|------------|
| 19059 | 293878.24 | 6127128.32 |
| 19060 | 293959.21 | 6127190.82 |
| 19061 | 293957.22 | 6127191.05 |
| 19062 | 293963.83 | 6127230.75 |
| 19063 | 293961.84 | 6127230.99 |
| 19064 | 293912.20 | 6127236.94 |
| 19065 | 293914.19 | 6127236.70 |
| 19066 | 293914.04 | 6127195.99 |
| 19067 | 293914.17 | 6127194.00 |
| 19068 | 293589.23 | 6127647.13 |
| 19069 | 293591.59 | 6127644.80 |
| 19070 | 293652.79 | 6127579.58 |
| 19071 | 293650.96 | 6127582.38 |
| 19072 | 293602.23 | 6126743.80 |
| 19073 | 293601.97 | 6126741.82 |
| 19074 | 298001.63 | 6127741.24 |
| 19075 | 295148.08 | 6128162.60 |
| 19076 | 295205.46 | 6128158.67 |
| 19077 | 295196.65 | 6128013.06 |
| 19078 | 295145.85 | 6128015.36 |
| 19079 | 297550.31 | 6127256.00 |
| 19080 | 297504.06 | 6127264.32 |
| 19081 | 295156.86 | 6128288.13 |
| 19082 | 295101.82 | 6128293.04 |
| 19083 | 295209.37 | 6128384.92 |
| 19084 | 295212.63 | 6128411.57 |
| 19085 | 295250.01 | 6128377.22 |
| 19086 | 295253.89 | 6128415.00 |
| 19087 | 295195.33 | 6128285.70 |
| 19088 | 295230.75 | 6128283.37 |
| 19089 | 295168.84 | 6128287.41 |
| 19090 | 298544.17 | 6128044.54 |
| 19091 | 298533.38 | 6127993.77 |
| 19092 | 294949.42 | 6127942.82 |
| 19093 | 294952.50 | 6127983.70 |
| 19094 | 294876.53 | 6127946.93 |
| 19095 | 294949.27 | 6127940.83 |
| 19096 | 294990.86 | 6127917.79 |
| 19097 | 294991.80 | 6127929.07 |
| 19098 | 294990.70 | 6127915.80 |
| 19099 | 294984.99 | 6127845.96 |
| 19100 | 295037.81 | 6127911.72 |
| 19101 | 295031.82 | 6127844.49 |
| 19102 | 294947.97 | 6127923.25 |
| 19103 | 294949.12 | 6127938.83 |
| 19104 | 294945.50 | 6127894.67 |
| 19105 | 294947.65 | 6127919.26 |
| 19106 | 294947.82 | 6127921.26 |
| 19107 | 294936.61 | 6128133.42 |
| 19108 | 294940.93 | 6128176.93 |

|       |           |            |
|-------|-----------|------------|
| 19109 | 294938.93 | 6128177.07 |
| 19110 | 294849.15 | 6128183.74 |
| 19111 | 295072.18 | 6128021.32 |
| 19112 | 294929.65 | 6128032.95 |
| 19113 | 297450.62 | 6127221.29 |
| 19114 | 297486.09 | 6127215.15 |
| 19115 | 297476.70 | 6127158.88 |
| 19116 | 297470.47 | 6127121.40 |
| 19117 | 298127.16 | 6127718.63 |
| 19118 | 297832.02 | 6127768.78 |
| 19119 | 296575.84 | 6129005.30 |
| 19120 | 296557.47 | 6128934.77 |
| 19121 | 295304.38 | 6126188.75 |
| 19122 | 295416.80 | 6126203.96 |
| 19123 | 295244.65 | 6124925.80 |
| 19124 | 295352.87 | 6124921.88 |
| 19125 | 297763.23 | 6127037.36 |
| 19126 | 297750.26 | 6126966.54 |
| 19127 | 294780.28 | 6127741.16 |
| 19128 | 294781.64 | 6127797.85 |
| 19129 | 295077.94 | 6126164.27 |
| 19130 | 295072.02 | 6126211.90 |
| 19131 | 298552.50 | 6128083.76 |
| 19132 | 297774.08 | 6127184.51 |
| 19133 | 297813.45 | 6127177.47 |
| 19134 | 294782.44 | 6127850.86 |
| 19135 | 297826.15 | 6127067.96 |
| 19136 | 297818.38 | 6127036.57 |
| 19137 | 297813.99 | 6127028.13 |
| 19138 | 297798.64 | 6126958.82 |
| 19139 | 297396.72 | 6128174.09 |
| 19140 | 297430.43 | 6128152.82 |
| 19141 | 294685.16 | 6127387.60 |
| 19142 | 294684.95 | 6127451.83 |
| 19143 | 298113.65 | 6129203.28 |
| 19144 | 298904.96 | 6128978.11 |
| 19145 | 298911.46 | 6129012.51 |
| 19146 | 295110.02 | 6124977.33 |
| 19147 | 295160.01 | 6124977.46 |
| 19148 | 295130.82 | 6124936.80 |
| 19149 | 295159.81 | 6124937.43 |
| 19150 | 295130.93 | 6124900.05 |
| 19151 | 295159.93 | 6124900.44 |
| 19152 | 295102.28 | 6125122.27 |
| 19153 | 295151.86 | 6125128.72 |
| 19154 | 297562.97 | 6126963.90 |
| 19155 | 297630.06 | 6126908.54 |
| 19156 | 297625.44 | 6126881.43 |
| 19157 | 298018.89 | 6127835.97 |
| 19158 | 298013.99 | 6127828.42 |

|       |           |            |
|-------|-----------|------------|
| 19159 | 298051.05 | 6127937.22 |
| 19160 | 295209.27 | 6127820.78 |
| 19161 | 295256.50 | 6127775.30 |
| 19162 | 295186.35 | 6128204.05 |
| 19163 | 295152.63 | 6128206.28 |
| 19164 | 294801.43 | 6125485.40 |
| 19165 | 294808.92 | 6125458.88 |
| 19166 | 295255.69 | 6124866.63 |
| 19167 | 295254.31 | 6124838.66 |
| 19168 | 295303.64 | 6124864.99 |
| 19169 | 295302.35 | 6124837.02 |
| 19170 | 295203.66 | 6124868.16 |
| 19171 | 295202.32 | 6124840.20 |
| 19172 | 295155.01 | 6124725.64 |
| 19173 | 295161.67 | 6124861.48 |
| 19174 | 295201.59 | 6124753.09 |
| 19175 | 294699.32 | 6126975.36 |
| 19176 | 294704.00 | 6126926.92 |
| 19177 | 294705.38 | 6126911.98 |
| 19178 | 294667.86 | 6127029.05 |
| 19179 | 294692.60 | 6127030.88 |
| 19180 | 294641.64 | 6126969.20 |
| 19181 | 294829.92 | 6124981.84 |
| 19182 | 294844.83 | 6125025.00 |
| 19183 | 296779.01 | 6126113.50 |
| 19184 | 296778.76 | 6126090.48 |
| 19185 | 296903.02 | 6126503.56 |
| 19186 | 296878.63 | 6126498.09 |
| 19187 | 296825.39 | 6128241.88 |
| 19188 | 296827.65 | 6128241.58 |
| 19189 | 296928.51 | 6128329.23 |
| 19190 | 296961.21 | 6128324.80 |
| 19191 | 296399.98 | 6125699.37 |
| 19192 | 296406.91 | 6125825.17 |
| 19193 | 295597.70 | 6125405.85 |
| 19194 | 295601.94 | 6125364.08 |
| 19195 | 295536.70 | 6125354.31 |
| 19196 | 295541.24 | 6125307.54 |
| 19197 | 296001.22 | 6128518.84 |
| 19198 | 296025.16 | 6128545.72 |
| 19199 | 294677.27 | 6127873.39 |
| 19200 | 294678.57 | 6127873.57 |
| 19201 | 298262.36 | 6127520.33 |
| 19202 | 294279.73 | 6126324.47 |
| 19203 | 294281.68 | 6126324.01 |
| 19204 | 294260.26 | 6126246.67 |
| 19205 | 294262.21 | 6126246.21 |
| 19206 | 294258.75 | 6126206.12 |
| 19207 | 294466.93 | 6126268.29 |
| 19208 | 294464.99 | 6126268.75 |

|       |           |            |
|-------|-----------|------------|
| 19209 | 294310.92 | 6127784.41 |
| 19210 | 294312.92 | 6127784.49 |
| 19211 | 294427.53 | 6126993.05 |
| 19212 | 294425.55 | 6126993.35 |
| 19213 | 294407.61 | 6126850.45 |
| 19214 | 294407.88 | 6126852.43 |
| 19215 | 294438.24 | 6126845.64 |
| 19216 | 294438.51 | 6126847.62 |
| 19217 | 294368.62 | 6126967.56 |
| 19218 | 294370.60 | 6126967.26 |
| 19219 | 294422.71 | 6126959.40 |
| 19220 | 294420.73 | 6126959.69 |
| 19221 | 294376.17 | 6126339.88 |
| 19222 | 294378.12 | 6126339.42 |
| 19223 | 294352.24 | 6126240.73 |
| 19224 | 294354.19 | 6126240.29 |
| 19225 | 296158.72 | 6127710.08 |
| 19226 | 296154.66 | 6127658.33 |
| 19227 | 296163.50 | 6127759.86 |
| 19228 | 296160.90 | 6127732.73 |
| 19229 | 294246.41 | 6125962.75 |
| 19230 | 294258.98 | 6125959.42 |
| 19231 | 294238.62 | 6125933.78 |
| 19232 | 294194.97 | 6125935.20 |
| 19233 | 295315.26 | 6128317.85 |
| 19234 | 295284.42 | 6128320.05 |
| 19235 | 295371.48 | 6128209.36 |
| 19236 | 295369.86 | 6128192.27 |
| 19237 | 295131.63 | 6128016.51 |
| 19238 | 293740.50 | 6126866.08 |
| 19239 | 293723.77 | 6126735.89 |
| 19240 | 295794.31 | 6125196.06 |
| 19241 | 295793.87 | 6125179.97 |
| 19242 | 296534.90 | 6127761.26 |
| 19243 | 296539.00 | 6127804.06 |
| 19244 | 296113.87 | 6125804.71 |
| 19245 | 296116.31 | 6125788.33 |
| 19246 | 293696.18 | 6127137.15 |
| 19247 | 293875.93 | 6127161.87 |
| 19248 | 293695.10 | 6127169.53 |
| 19249 | 294374.46 | 6127001.05 |
| 19250 | 294362.63 | 6126933.21 |
| 19251 | 294416.14 | 6126925.98 |
| 19252 | 293873.16 | 6127236.73 |
| 19253 | 293872.33 | 6127248.70 |
| 19254 | 293877.93 | 6127161.79 |
| 19255 | 294616.20 | 6125364.37 |
| 19256 | 294602.95 | 6125324.68 |
| 19257 | 296332.32 | 6126074.30 |
| 19258 | 296331.38 | 6126066.37 |

|       |           |            |
|-------|-----------|------------|
| 19259 | 296351.36 | 6126189.71 |
| 19260 | 296332.92 | 6126078.25 |
| 19261 | 296355.68 | 6126319.26 |
| 19262 | 294145.76 | 6125859.57 |
| 19263 | 294168.40 | 6125901.90 |
| 19264 | 294161.30 | 6126037.41 |
| 19265 | 294216.50 | 6126021.58 |
| 19266 | 294247.29 | 6126158.67 |
| 19267 | 294254.14 | 6126508.38 |
| 19268 | 294194.14 | 6126519.37 |
| 19269 | 294243.29 | 6126373.78 |
| 19270 | 294240.87 | 6126338.31 |
| 19271 | 294249.77 | 6126457.02 |
| 19272 | 294246.15 | 6126415.68 |
| 19273 | 294256.10 | 6126508.02 |
| 19274 | 294269.92 | 6126285.17 |
| 19275 | 294253.58 | 6125179.24 |
| 19276 | 294340.16 | 6125416.05 |
| 19277 | 294327.22 | 6125147.78 |
| 19278 | 294256.57 | 6124957.71 |
| 19279 | 294293.69 | 6124942.72 |
| 19280 | 294255.89 | 6124955.83 |
| 19281 | 294252.89 | 6125177.36 |
| 19282 | 294290.41 | 6125163.50 |
| 19283 | 294342.35 | 6125723.93 |
| 19284 | 294284.28 | 6125605.39 |
| 19285 | 295488.76 | 6127574.78 |
| 19286 | 295380.91 | 6127482.39 |
| 19287 | 295436.47 | 6127478.98 |
| 19288 | 295393.47 | 6127393.40 |
| 19289 | 295411.61 | 6127391.89 |
| 19290 | 295367.94 | 6128134.92 |
| 19291 | 295357.21 | 6128082.00 |
| 19292 | 296912.41 | 6127400.44 |
| 19293 | 296938.55 | 6127396.50 |
| 19294 | 297025.83 | 6127383.22 |
| 19295 | 297026.75 | 6127394.16 |
| 19296 | 295981.12 | 6125872.63 |
| 19297 | 295985.09 | 6125840.66 |
| 19298 | 295641.69 | 6127867.01 |
| 19299 | 295634.73 | 6127867.70 |
| 19300 | 295668.56 | 6127864.31 |
| 19301 | 295509.54 | 6128129.11 |
| 19302 | 295542.23 | 6128124.61 |
| 19303 | 298509.89 | 6127920.53 |
| 19304 | 298502.38 | 6127881.38 |
| 19305 | 298502.00 | 6127879.42 |
| 19306 | 298530.13 | 6127873.37 |
| 19307 | 294478.17 | 6125208.03 |
| 19308 | 294475.74 | 6125200.77 |

|       |           |            |
|-------|-----------|------------|
| 19309 | 294520.87 | 6125185.63 |
| 19310 | 294484.77 | 6125345.72 |
| 19311 | 294492.97 | 6125343.04 |
| 19312 | 294481.75 | 6125369.54 |
| 19313 | 294454.23 | 6125378.66 |
| 19314 | 294526.68 | 6125332.06 |
| 19315 | 295753.26 | 6127226.79 |
| 19316 | 295940.83 | 6127206.78 |
| 19317 | 295874.75 | 6127165.92 |
| 19318 | 295913.27 | 6127163.04 |
| 19319 | 295991.15 | 6125807.17 |
| 19320 | 296109.62 | 6125821.80 |
| 19321 | 295995.42 | 6125773.44 |
| 19322 | 296114.33 | 6125788.09 |
| 19323 | 295994.42 | 6125765.28 |
| 19324 | 295996.66 | 6125747.16 |
| 19325 | 295968.09 | 6125877.19 |
| 19326 | 295980.37 | 6125878.72 |
| 19327 | 294216.74 | 6125319.27 |
| 19328 | 294179.97 | 6125332.24 |
| 19329 | 294207.14 | 6125286.60 |
| 19330 | 294218.63 | 6125318.60 |
| 19331 | 296734.05 | 6127895.70 |
| 19332 | 296724.02 | 6127808.28 |
| 19333 | 296913.34 | 6128328.75 |
| 19334 | 296909.98 | 6128300.96 |
| 19335 | 296928.88 | 6128331.19 |
| 19336 | 296933.56 | 6128355.75 |
| 19337 | 294505.93 | 6125284.76 |
| 19338 | 294590.85 | 6125256.33 |
| 19339 | 295521.03 | 6124991.89 |
| 19340 | 295879.89 | 6125369.79 |
| 19341 | 295875.86 | 6125291.12 |
| 19342 | 297157.09 | 6127683.29 |
| 19343 | 297198.34 | 6127675.37 |
| 19344 | 295462.86 | 6127309.96 |
| 19345 | 295406.41 | 6127303.61 |
| 19346 | 295393.75 | 6127391.42 |
| 19347 | 294927.74 | 6127353.22 |
| 19348 | 294929.65 | 6127403.56 |
| 19349 | 294878.40 | 6127357.36 |
| 19350 | 294881.13 | 6127407.20 |
| 19351 | 294939.58 | 6127352.14 |
| 19352 | 294229.71 | 6126174.55 |
| 19353 | 294201.28 | 6126180.93 |
| 19354 | 294226.98 | 6126134.52 |
| 19355 | 294240.44 | 6126331.89 |
| 19356 | 294233.68 | 6126232.81 |
| 19357 | 294389.34 | 6124957.73 |
| 19358 | 294360.78 | 6124966.90 |



|       |           |            |
|-------|-----------|------------|
| 19359 | 294365.45 | 6125135.79 |
| 19360 | 294394.82 | 6125124.94 |
| 19361 | 294328.62 | 6125151.52 |
| 19362 | 294415.85 | 6125390.16 |
| 19363 | 294323.80 | 6124930.54 |
| 19364 | 293542.72 | 6127068.28 |
| 19365 | 293694.32 | 6127061.02 |
| 19366 | 293495.33 | 6126981.22 |
| 19367 | 293497.43 | 6126971.15 |
| 19368 | 294291.10 | 6125165.38 |
| 19369 | 294294.00 | 6125173.32 |
| 19370 | 295381.92 | 6125153.84 |
| 19371 | 295380.50 | 6125091.16 |
| 19372 | 295380.15 | 6125081.16 |
| 19373 | 295377.28 | 6124997.22 |
| 19374 | 294442.69 | 6124937.66 |
| 19375 | 294412.08 | 6125109.17 |
| 19376 | 294438.46 | 6125099.80 |
| 19377 | 293777.01 | 6125292.59 |
| 19378 | 293757.03 | 6125257.23 |
| 19379 | 295673.53 | 6125328.04 |
| 19380 | 295718.85 | 6125326.19 |
| 19381 | 295674.74 | 6125247.82 |
| 19382 | 295715.54 | 6125246.60 |
| 19383 | 296169.67 | 6127060.30 |
| 19384 | 296522.73 | 6127378.54 |
| 19385 | 296223.69 | 6127154.72 |
| 19386 | 296517.98 | 6127400.90 |
| 19387 | 296664.00 | 6127745.67 |
| 19388 | 296669.61 | 6127793.33 |
| 19389 | 295361.49 | 6128514.49 |
| 19390 | 295362.75 | 6128550.58 |
| 19391 | 295988.27 | 6127670.37 |
| 19392 | 296027.75 | 6127667.82 |
| 19393 | 296036.49 | 6127667.14 |
| 19394 | 296024.17 | 6127552.78 |
| 19395 | 296036.27 | 6127665.16 |
| 19396 | 296135.26 | 6126164.87 |
| 19397 | 295982.63 | 6127670.74 |
| 19398 | 295972.15 | 6127564.84 |
| 19399 | 296136.81 | 6127543.15 |
| 19400 | 296172.59 | 6127540.56 |
| 19401 | 295596.21 | 6127871.08 |
| 19402 | 295550.42 | 6127875.44 |
| 19403 | 295711.37 | 6127860.34 |
| 19404 | 296534.71 | 6127759.27 |
| 19405 | 296541.66 | 6127758.45 |
| 19406 | 296564.50 | 6127755.75 |
| 19407 | 296569.46 | 6127755.16 |
| 19408 | 296578.90 | 6127754.05 |

|       |           |            |
|-------|-----------|------------|
| 19409 | 296618.35 | 6127747.38 |
| 19410 | 296611.80 | 6127699.84 |
| 19411 | 296073.05 | 6127549.28 |
| 19412 | 296085.27 | 6127660.60 |
| 19413 | 296122.73 | 6127544.17 |
| 19414 | 293491.19 | 6125186.93 |
| 19415 | 293638.98 | 6125125.63 |
| 19416 | 293883.02 | 6127086.17 |
| 19417 | 293885.19 | 6127040.22 |
| 19418 | 293862.55 | 6127031.91 |
| 19419 | 293858.34 | 6126937.01 |
| 19420 | 293822.45 | 6126941.27 |
| 19421 | 293847.57 | 6126855.20 |
| 19422 | 293863.07 | 6126853.30 |
| 19423 | 293812.65 | 6126861.39 |
| 19424 | 293821.67 | 6126936.85 |
| 19425 | 293847.82 | 6126857.18 |
| 19426 | 293857.41 | 6126932.52 |
| 19427 | 293894.16 | 6126936.45 |
| 19428 | 293883.89 | 6126850.74 |
| 19429 | 294103.55 | 6126842.29 |
| 19430 | 294102.74 | 6126809.65 |
| 19431 | 294093.59 | 6126814.06 |
| 19432 | 294094.87 | 6126862.03 |
| 19433 | 294059.64 | 6126820.67 |
| 19434 | 294064.18 | 6126866.45 |
| 19435 | 293988.48 | 6126830.80 |
| 19436 | 294023.96 | 6126824.74 |
| 19437 | 294024.15 | 6126826.73 |
| 19438 | 294028.00 | 6126866.55 |
| 19439 | 293988.24 | 6126828.82 |
| 19440 | 293977.64 | 6126741.47 |
| 19441 | 293952.74 | 6126838.19 |
| 19442 | 293941.89 | 6126748.85 |
| 19443 | 296825.26 | 6127413.52 |
| 19444 | 296823.96 | 6127404.11 |
| 19445 | 296779.52 | 6127475.84 |
| 19446 | 296770.47 | 6127411.48 |
| 19447 | 296119.95 | 6127965.33 |
| 19448 | 296110.34 | 6127875.97 |
| 19449 | 293685.54 | 6127168.12 |
| 19450 | 293691.75 | 6127139.32 |
| 19451 | 295668.58 | 6125080.89 |
| 19452 | 295495.56 | 6127474.82 |
| 19453 | 295494.36 | 6127482.54 |
| 19454 | 295595.21 | 6127474.44 |
| 19455 | 295603.27 | 6127473.86 |
| 19456 | 294037.27 | 6124712.94 |
| 19457 | 294075.10 | 6124699.96 |
| 19458 | 293721.89 | 6125420.70 |

|       |           |            |
|-------|-----------|------------|
| 19459 | 293683.33 | 6125349.45 |
| 19460 | 293432.65 | 6127218.44 |
| 19461 | 293348.48 | 6127270.55 |
| 19462 | 293661.35 | 6127208.54 |
| 19463 | 296064.42 | 6127880.51 |
| 19464 | 295692.24 | 6126971.18 |
| 19465 | 295689.43 | 6126937.30 |
| 19466 | 294545.19 | 6125594.60 |
| 19467 | 294517.34 | 6125475.64 |
| 19468 | 294710.88 | 6125072.71 |
| 19469 | 294824.84 | 6125031.55 |
| 19470 | 296042.80 | 6127821.37 |
| 19471 | 296027.95 | 6127669.81 |
| 19472 | 295753.34 | 6125197.57 |
| 19473 | 295752.96 | 6125183.58 |
| 19474 | 295752.91 | 6125181.58 |
| 19475 | 295755.13 | 6125245.66 |
| 19476 | 295753.47 | 6125201.57 |
| 19477 | 294641.00 | 6127387.66 |
| 19478 | 294557.16 | 6127390.96 |
| 19479 | 294555.11 | 6127459.04 |
| 19480 | 294651.07 | 6127454.92 |
| 19481 | 294960.75 | 6125172.64 |
| 19482 | 294966.26 | 6125119.66 |
| 19483 | 294891.50 | 6125112.89 |
| 19484 | 294956.30 | 6125118.76 |
| 19485 | 294961.45 | 6125071.55 |
| 19486 | 295033.64 | 6124899.86 |
| 19487 | 295022.02 | 6125076.73 |
| 19488 | 296160.72 | 6127709.93 |
| 19489 | 296252.78 | 6127703.36 |
| 19490 | 296019.16 | 6128283.74 |
| 19491 | 295985.03 | 6128287.76 |
| 19492 | 294794.36 | 6124870.69 |
| 19493 | 294820.69 | 6124861.15 |
| 19494 | 295662.65 | 6124927.22 |
| 19495 | 295691.60 | 6127630.02 |
| 19496 | 294370.59 | 6127434.21 |
| 19497 | 294374.27 | 6127463.75 |
| 19498 | 296116.83 | 6125760.69 |
| 19499 | 296863.44 | 6128236.83 |
| 19500 | 295862.45 | 6127124.87 |
| 19501 | 295849.48 | 6127125.74 |
| 19502 | 295833.02 | 6127367.09 |
| 19503 | 295870.39 | 6127363.76 |
| 19504 | 294583.59 | 6124895.61 |
| 19505 | 294595.19 | 6124928.11 |
| 19506 | 294568.53 | 6125170.85 |
| 19507 | 294603.22 | 6125158.86 |
| 19508 | 294582.96 | 6125048.86 |

|       |           |            |
|-------|-----------|------------|
| 19509 | 294732.91 | 6125013.41 |
| 19510 | 294491.74 | 6125400.46 |
| 19511 | 294544.19 | 6125388.24 |
| 19512 | 294560.25 | 6125433.71 |
| 19513 | 294546.34 | 6126146.84 |
| 19514 | 294562.22 | 6126140.77 |
| 19515 | 295729.47 | 6127472.17 |
| 19516 | 295728.92 | 6127465.31 |
| 19517 | 295726.77 | 6127463.50 |
| 19518 | 295304.58 | 6126186.76 |
| 19519 | 295327.29 | 6125975.99 |
| 19520 | 295249.35 | 6125978.80 |
| 19521 | 296758.14 | 6127895.07 |
| 19522 | 296788.96 | 6127891.75 |
| 19523 | 297811.73 | 6127643.29 |
| 19524 | 297824.14 | 6127717.39 |
| 19525 | 297528.47 | 6127302.51 |
| 19526 | 297572.84 | 6127294.88 |
| 19527 | 295209.33 | 6124757.53 |
| 19528 | 294667.79 | 6127750.98 |
| 19529 | 294677.78 | 6127750.42 |
| 19530 | 298185.89 | 6127448.60 |
| 19531 | 298302.82 | 6127402.63 |
| 19532 | 298557.37 | 6127719.75 |
| 19533 | 298569.51 | 6127773.96 |
| 19534 | 295157.89 | 6127819.91 |
| 19535 | 295161.19 | 6127767.01 |
| 19536 | 294792.48 | 6124871.37 |
| 19537 | 294776.55 | 6124829.66 |
| 19538 | 294774.63 | 6124830.24 |
| 19539 | 294778.44 | 6124829.01 |
| 19540 | 293918.23 | 6127163.85 |
| 19541 | 293949.01 | 6127119.19 |
| 19542 | 293178.88 | 6127278.70 |
| 19543 | 293283.92 | 6127218.27 |
| 19544 | 293345.82 | 6127316.91 |
| 19545 | 293324.51 | 6127284.25 |
| 19546 | 294096.25 | 6125766.99 |
| 19547 | 294098.00 | 6125766.01 |
| 19548 | 294071.10 | 6125828.05 |
| 19549 | 294292.58 | 6126826.43 |
| 19550 | 293541.71 | 6127057.68 |
| 19551 | 293541.90 | 6127059.67 |
| 19552 | 295553.44 | 6127237.89 |
| 19553 | 295170.56 | 6126170.52 |
| 19554 | 295172.54 | 6126170.78 |
| 19555 | 295320.27 | 6126067.52 |
| 19556 | 295322.25 | 6126067.77 |
| 19557 | 295318.28 | 6126067.27 |
| 19558 | 295170.23 | 6126173.50 |

|       |           |            |
|-------|-----------|------------|
| 19559 | 295172.21 | 6126173.76 |
| 19560 | 295283.77 | 6126433.78 |
| 19561 | 295285.75 | 6126434.07 |
| 19562 | 293434.35 | 6127217.39 |
| 19563 | 293433.36 | 6127215.65 |
| 19564 | 293366.30 | 6127304.69 |
| 19565 | 293365.28 | 6127302.96 |
| 19566 | 293397.11 | 6127152.29 |
| 19567 | 295102.13 | 6126706.47 |
| 19568 | 294983.31 | 6127002.54 |
| 19569 | 294983.53 | 6127000.55 |
| 19570 | 295065.53 | 6127010.40 |
| 19571 | 295065.32 | 6127012.38 |
| 19572 | 295065.77 | 6127008.41 |
| 19573 | 297038.04 | 6127489.67 |
| 19574 | 297038.28 | 6127491.66 |
| 19575 | 297090.06 | 6127585.38 |
| 19576 | 297088.09 | 6127585.72 |
| 19577 | 296118.48 | 6128097.12 |
| 19578 | 296118.76 | 6128099.10 |
| 19579 | 293772.38 | 6127776.29 |
| 19580 | 293811.28 | 6127737.19 |
| 19581 | 297271.95 | 6128203.15 |
| 19582 | 297272.41 | 6128205.09 |
| 19583 | 298751.31 | 6129042.78 |
| 19584 | 298753.27 | 6129042.41 |
| 19585 | 298596.01 | 6129100.11 |
| 19586 | 298597.98 | 6129099.74 |
| 19587 | 298589.89 | 6129067.69 |
| 19588 | 298591.85 | 6129067.32 |
| 19589 | 298584.41 | 6129038.69 |
| 19590 | 298584.94 | 6129041.51 |
| 19591 | 298684.46 | 6129049.82 |
| 19592 | 298682.49 | 6129050.19 |
| 19593 | 298524.47 | 6129050.02 |
| 19594 | 298524.84 | 6129051.99 |
| 19595 | 298492.05 | 6129056.15 |
| 19596 | 298492.42 | 6129058.11 |
| 19597 | 298459.62 | 6129062.28 |
| 19598 | 298459.99 | 6129064.24 |
| 19599 | 298421.30 | 6129069.52 |
| 19600 | 298419.34 | 6129069.89 |
| 19601 | 298392.32 | 6129075.00 |
| 19602 | 298392.69 | 6129076.96 |
| 19603 | 293398.78 | 6126835.27 |
| 19604 | 293398.79 | 6126836.67 |
| 19605 | 293438.78 | 6126835.03 |
| 19606 | 293438.79 | 6126836.43 |
| 19607 | 293478.78 | 6126835.68 |
| 19608 | 293478.79 | 6126837.30 |

|       |           |            |
|-------|-----------|------------|
| 19609 | 297123.13 | 6127030.25 |
| 19610 | 297123.04 | 6127032.25 |
| 19611 | 297369.03 | 6128180.79 |
| 19612 | 297369.50 | 6128182.73 |
| 19613 | 297387.03 | 6128255.18 |
| 19614 | 297386.56 | 6128253.24 |
| 19615 | 297383.72 | 6128256.03 |
| 19616 | 297414.61 | 6128248.63 |
| 19617 | 297414.14 | 6128246.68 |
| 19618 | 298690.59 | 6129082.24 |
| 19619 | 298688.62 | 6129082.61 |
| 19620 | 298767.35 | 6129127.66 |
| 19621 | 298769.34 | 6129127.43 |
| 19622 | 298765.37 | 6129127.90 |
| 19623 | 298878.04 | 6128835.64 |
| 19624 | 298878.41 | 6128837.61 |
| 19625 | 298284.09 | 6129035.41 |
| 19626 | 298655.19 | 6128966.29 |
| 19627 | 298654.82 | 6128964.33 |
| 19628 | 298967.77 | 6128863.51 |
| 19629 | 298969.73 | 6128863.14 |
| 19630 | 298920.29 | 6128827.66 |
| 19631 | 298920.66 | 6128829.62 |
| 19632 | 298942.97 | 6128947.66 |
| 19633 | 298941.00 | 6128948.03 |
| 19634 | 298740.56 | 6128985.91 |
| 19635 | 298742.53 | 6128985.54 |
| 19636 | 298133.48 | 6127927.50 |
| 19637 | 298098.24 | 6127981.35 |
| 19638 | 297924.03 | 6127850.55 |
| 19639 | 297925.26 | 6127848.98 |
| 19640 | 297813.73 | 6127643.15 |
| 19641 | 295628.92 | 6126490.79 |
| 19642 | 295297.51 | 6125502.19 |
| 19643 | 295209.42 | 6124759.53 |
| 19644 | 295209.26 | 6124755.53 |
| 19645 | 295203.75 | 6124870.16 |
| 19646 | 295255.79 | 6124868.62 |
| 19647 | 294899.79 | 6125863.62 |
| 19648 | 294897.81 | 6125863.39 |
| 19649 | 293708.27 | 6127836.19 |
| 19650 | 293709.37 | 6127837.53 |
| 19651 | 297182.16 | 6127002.99 |
| 19652 | 297182.31 | 6127000.99 |
| 19653 | 295506.80 | 6125529.47 |
| 19654 | 295506.54 | 6125531.45 |
| 19655 | 295161.88 | 6125051.46 |
| 19656 | 298268.12 | 6128950.91 |
| 19657 | 298268.49 | 6128952.88 |
| 19658 | 298300.54 | 6128944.78 |

|       |           |            |
|-------|-----------|------------|
| 19659 | 298300.92 | 6128946.75 |
| 19660 | 295386.72 | 6126447.26 |
| 19661 | 295388.70 | 6126447.51 |
| 19662 | 295429.57 | 6126081.75 |
| 19663 | 295416.89 | 6126206.99 |
| 19664 | 295417.14 | 6126205.01 |
| 19665 | 295414.90 | 6126206.73 |
| 19666 | 295477.49 | 6126735.01 |
| 19667 | 293035.64 | 6127026.77 |
| 19668 | 293035.56 | 6127028.77 |
| 19669 | 296712.71 | 6128894.62 |
| 19670 | 296667.77 | 6128904.33 |
| 19671 | 296667.28 | 6128902.40 |
| 19672 | 296668.26 | 6128906.27 |
| 19673 | 296634.85 | 6128912.93 |
| 19674 | 296634.35 | 6128910.99 |
| 19675 | 296635.34 | 6128914.87 |
| 19676 | 297756.74 | 6127370.98 |
| 19677 | 297757.65 | 6127372.85 |
| 19678 | 297764.49 | 6127130.68 |
| 19679 | 297764.84 | 6127132.65 |
| 19680 | 294539.24 | 6126830.21 |
| 19681 | 294539.54 | 6126832.19 |
| 19682 | 294638.58 | 6126814.28 |
| 19683 | 294638.87 | 6126816.26 |
| 19684 | 298235.06 | 6129189.23 |
| 19685 | 298234.68 | 6129187.26 |
| 19686 | 298849.70 | 6128187.59 |
| 19687 | 298850.34 | 6128189.48 |
| 19688 | 296017.28 | 6125213.66 |
| 19689 | 295878.10 | 6125370.67 |
| 19690 | 295898.17 | 6126388.00 |
| 19691 | 295898.44 | 6126386.02 |
| 19692 | 296085.73 | 6125498.60 |
| 19693 | 293934.35 | 6127693.03 |
| 19694 | 293935.05 | 6127681.84 |
| 19695 | 293980.60 | 6127685.85 |
| 19696 | 294139.85 | 6127753.96 |
| 19697 | 293919.76 | 6126844.83 |
| 19698 | 294103.77 | 6126847.48 |
| 19699 | 297627.41 | 6126881.08 |
| 19700 | 297721.40 | 6126825.36 |
| 19701 | 297692.95 | 6126830.57 |
| 19702 | 293952.20 | 6125599.27 |
| 19703 | 293983.57 | 6125582.49 |
| 19704 | 293984.49 | 6125584.26 |
| 19705 | 293979.90 | 6125671.09 |
| 19706 | 293954.90 | 6125684.11 |
| 19707 | 293978.96 | 6125669.32 |
| 19708 | 293945.68 | 6125605.02 |

|       |           |            |
|-------|-----------|------------|
| 19709 | 295632.71 | 6126478.68 |
| 19710 | 295743.49 | 6126492.50 |
| 19711 | 295658.02 | 6126355.23 |
| 19712 | 295773.07 | 6126371.04 |
| 19713 | 296074.20 | 6127970.14 |
| 19714 | 297085.12 | 6128314.87 |
| 19715 | 297080.68 | 6128282.17 |
| 19716 | 297043.83 | 6128322.90 |
| 19717 | 297085.39 | 6128316.85 |
| 19718 | 295925.09 | 6127226.61 |
| 19719 | 295900.21 | 6127360.50 |
| 19720 | 294809.38 | 6124920.90 |
| 19721 | 294690.43 | 6125390.80 |
| 19722 | 294793.14 | 6125356.96 |
| 19723 | 294683.19 | 6126721.51 |
| 19724 | 294519.10 | 6126749.82 |
| 19725 | 295602.25 | 6125074.51 |
| 19726 | 293611.55 | 6127053.93 |
| 19727 | 293615.54 | 6127053.69 |
| 19728 | 293648.17 | 6127052.01 |
| 19729 | 295366.76 | 6128512.16 |
| 19730 | 295671.78 | 6128003.46 |
| 19731 | 295666.31 | 6128004.03 |
| 19732 | 294255.83 | 6127706.06 |
| 19733 | 294161.30 | 6127715.74 |
| 19734 | 294159.10 | 6127698.68 |
| 19735 | 294254.19 | 6127683.23 |
| 19736 | 294260.47 | 6127752.77 |
| 19737 | 294342.65 | 6126779.87 |
| 19738 | 294376.44 | 6127000.75 |
| 19739 | 294380.26 | 6127532.54 |
| 19740 | 294406.44 | 6127531.59 |
| 19741 | 293673.31 | 6127309.70 |
| 19742 | 293673.27 | 6127322.97 |
| 19743 | 296706.95 | 6127507.11 |
| 19744 | 296687.12 | 6127509.72 |
| 19745 | 296694.12 | 6127490.50 |
| 19746 | 296705.16 | 6127488.94 |
| 19747 | 296685.40 | 6127424.07 |
| 19748 | 296715.11 | 6127419.89 |
| 19749 | 296842.78 | 6127723.78 |
| 19750 | 296831.14 | 6127624.46 |
| 19751 | 296830.81 | 6127622.48 |
| 19752 | 296815.95 | 6127531.70 |
| 19753 | 296799.05 | 6127476.92 |
| 19754 | 296803.92 | 6127514.20 |
| 19755 | 296165.50 | 6127759.72 |
| 19756 | 296261.91 | 6127753.10 |
| 19757 | 296275.31 | 6128087.25 |
| 19758 | 296318.20 | 6128081.98 |



|       |           |            |
|-------|-----------|------------|
| 19759 | 296206.36 | 6128178.97 |
| 19760 | 296204.83 | 6128167.19 |
| 19761 | 296762.19 | 6128352.67 |
| 19762 | 296780.29 | 6128346.91 |
| 19763 | 296768.04 | 6128363.15 |
| 19764 | 296817.94 | 6128338.24 |
| 19765 | 293761.60 | 6125527.99 |
| 19766 | 293785.33 | 6125514.96 |
| 19767 | 294331.70 | 6127039.25 |
| 19768 | 295684.16 | 6127157.26 |
| 19769 | 295747.12 | 6127152.25 |
| 19770 | 295684.12 | 6127422.39 |
| 19771 | 295523.85 | 6127261.37 |
| 19772 | 294959.19 | 6127511.16 |
| 19773 | 294955.57 | 6127466.31 |
| 19774 | 295750.67 | 6127745.42 |
| 19775 | 296405.60 | 6126616.25 |
| 19776 | 293806.13 | 6125662.46 |
| 19777 | 293804.39 | 6125663.46 |
| 19778 | 294005.37 | 6125704.45 |
| 19779 | 294069.21 | 6125824.53 |
| 19780 | 294463.79 | 6124689.80 |
| 19781 | 294518.29 | 6124718.81 |
| 19782 | 295040.56 | 6124493.16 |
| 19783 | 295037.92 | 6124415.34 |
| 19784 | 294974.59 | 6124497.02 |
| 19785 | 294959.67 | 6124497.44 |
| 19786 | 295915.47 | 6125158.70 |
| 19787 | 295960.42 | 6125156.62 |
| 19788 | 294242.47 | 6126127.13 |
| 19789 | 294282.42 | 6126117.89 |
| 19790 | 294139.53 | 6127661.02 |
| 19791 | 294138.98 | 6127701.94 |
| 19792 | 293987.34 | 6127602.12 |
| 19793 | 293980.76 | 6127683.86 |
| 19794 | 294039.29 | 6127599.42 |
| 19795 | 295833.86 | 6127183.50 |
| 19796 | 295750.96 | 6127174.79 |
| 19797 | 295793.48 | 6127171.84 |
| 19798 | 293543.70 | 6127057.60 |
| 19799 | 293559.59 | 6127056.95 |
| 19800 | 295847.44 | 6127864.26 |
| 19801 | 295857.21 | 6127864.66 |
| 19802 | 296706.57 | 6128006.29 |
| 19803 | 296713.42 | 6128005.60 |
| 19804 | 293130.60 | 6126954.71 |
| 19805 | 293151.78 | 6126988.64 |
| 19806 | 296121.27 | 6125289.70 |
| 19807 | 296066.15 | 6125236.18 |
| 19808 | 296354.48 | 6125711.95 |

|       |           |            |
|-------|-----------|------------|
| 19809 | 296361.62 | 6125827.79 |
| 19810 | 296669.15 | 6125941.66 |
| 19811 | 296445.91 | 6125696.79 |
| 19812 | 296452.69 | 6125822.60 |
| 19813 | 295442.61 | 6126055.55 |
| 19814 | 295455.17 | 6125957.80 |
| 19815 | 295645.10 | 6127986.58 |
| 19816 | 295643.11 | 6127986.76 |
| 19817 | 295604.60 | 6126607.00 |
| 19818 | 295612.52 | 6126607.72 |
| 19819 | 295711.27 | 6127858.34 |
| 19820 | 296890.38 | 6126568.34 |
| 19821 | 293575.47 | 6127056.30 |
| 19822 | 294376.83 | 6126586.03 |
| 19823 | 296788.75 | 6127889.76 |
| 19824 | 296779.43 | 6127802.26 |
| 19825 | 296904.17 | 6127878.03 |
| 19826 | 296897.82 | 6127813.09 |
| 19827 | 296977.35 | 6127804.41 |
| 19828 | 296994.44 | 6127867.92 |
| 19829 | 296983.91 | 6127771.17 |
| 19830 | 296994.66 | 6127869.91 |
| 19831 | 297037.49 | 6127866.11 |
| 19832 | 294486.76 | 6125364.26 |
| 19833 | 294529.86 | 6125350.22 |
| 19834 | 294504.04 | 6125285.40 |
| 19835 | 294542.30 | 6125388.89 |
| 19836 | 294506.48 | 6125401.07 |
| 19837 | 296640.87 | 6126492.28 |
| 19838 | 298235.49 | 6127789.61 |
| 19839 | 297090.31 | 6127340.30 |
| 19840 | 297077.83 | 6127259.25 |
| 19841 | 294528.48 | 6125657.47 |
| 19842 | 294105.76 | 6126847.25 |
| 19843 | 295766.41 | 6125814.78 |
| 19844 | 295790.53 | 6125817.48 |
| 19845 | 295186.09 | 6125399.40 |
| 19846 | 295744.22 | 6128352.38 |
| 19847 | 295759.09 | 6128349.60 |
| 19848 | 295744.12 | 6128350.38 |
| 19849 | 293880.49 | 6127124.08 |
| 19850 | 296149.66 | 6126040.44 |
| 19851 | 296165.11 | 6125903.17 |
| 19852 | 296417.01 | 6125826.60 |
| 19853 | 296452.80 | 6125824.60 |
| 19854 | 294481.49 | 6125346.78 |
| 19855 | 297744.08 | 6126517.76 |
| 19856 | 297771.93 | 6126482.35 |
| 19857 | 294323.38 | 6126783.64 |
| 19858 | 294316.96 | 6126742.40 |

|       |           |            |
|-------|-----------|------------|
| 19859 | 294885.46 | 6124791.32 |
| 19860 | 296606.62 | 6126485.99 |
| 19861 | 296633.03 | 6126345.20 |
| 19862 | 296557.07 | 6126478.62 |
| 19863 | 296563.90 | 6126429.09 |
| 19864 | 296979.61 | 6128222.51 |
| 19865 | 296986.26 | 6128277.11 |
| 19866 | 295393.75 | 6126441.85 |
| 19867 | 297850.26 | 6126384.33 |
| 19868 | 294955.75 | 6128019.55 |
| 19869 | 294569.93 | 6124651.04 |
| 19870 | 294974.59 | 6124495.02 |
| 19871 | 294970.60 | 6124381.10 |
| 19872 | 296778.31 | 6126070.49 |
| 19873 | 295794.56 | 6128520.38 |
| 19874 | 296929.50 | 6126395.62 |
| 19875 | 296927.56 | 6126395.12 |
| 19876 | 295983.10 | 6128592.85 |
| 19877 | 296017.24 | 6128250.02 |
| 19878 | 296015.26 | 6128250.25 |
| 19879 | 296704.19 | 6128258.65 |
| 19880 | 296703.81 | 6128256.69 |
| 19881 | 295987.72 | 6126404.34 |
| 19882 | 295987.55 | 6126406.33 |
| 19883 | 295538.67 | 6125354.61 |
| 19884 | 296493.23 | 6128288.70 |
| 19885 | 296493.50 | 6128290.68 |
| 19886 | 296537.53 | 6128408.46 |
| 19887 | 296537.24 | 6128406.49 |
| 19888 | 296621.46 | 6128390.96 |
| 19889 | 296621.20 | 6128388.98 |
| 19890 | 296614.62 | 6128271.46 |
| 19891 | 296614.89 | 6128273.44 |
| 19892 | 296282.47 | 6128451.73 |
| 19893 | 296282.27 | 6128449.74 |
| 19894 | 294954.93 | 6126687.37 |
| 19895 | 294954.83 | 6126689.37 |
| 19896 | 293665.41 | 6126876.44 |
| 19897 | 293665.15 | 6126874.45 |
| 19898 | 293629.88 | 6126882.66 |
| 19899 | 293701.76 | 6127092.08 |
| 19900 | 293925.89 | 6127017.94 |
| 19901 | 294033.26 | 6125556.67 |
| 19902 | 294076.02 | 6125729.05 |
| 19903 | 294077.77 | 6125728.07 |
| 19904 | 293736.07 | 6125417.22 |
| 19905 | 294863.83 | 6125377.13 |
| 19906 | 294864.01 | 6125375.14 |
| 19907 | 294482.13 | 6125348.68 |
| 19908 | 294515.32 | 6125017.63 |

|       |           |            |
|-------|-----------|------------|
| 19909 | 294513.45 | 6125018.32 |
| 19910 | 294533.07 | 6125066.50 |
| 19911 | 294531.18 | 6125067.17 |
| 19912 | 294498.88 | 6124970.41 |
| 19913 | 294497.00 | 6124971.10 |
| 19914 | 294500.75 | 6124969.70 |
| 19915 | 295427.82 | 6125077.91 |
| 19916 | 295425.16 | 6124997.67 |
| 19917 | 295475.85 | 6125076.19 |
| 19918 | 295473.15 | 6124995.63 |
| 19919 | 296563.39 | 6126125.75 |
| 19920 | 296558.20 | 6126067.98 |
| 19921 | 296552.22 | 6125996.31 |
| 19922 | 294296.66 | 6126788.95 |
| 19923 | 294301.60 | 6126648.52 |
| 19924 | 294332.40 | 6126954.13 |
| 19925 | 294357.45 | 6127081.69 |
| 19926 | 293884.13 | 6126852.73 |
| 19927 | 293893.15 | 6126928.19 |
| 19928 | 295558.35 | 6127477.28 |
| 19929 | 295692.95 | 6127468.70 |
| 19930 | 295695.82 | 6127508.91 |
| 19931 | 295733.16 | 6127513.79 |
| 19932 | 295686.28 | 6127559.61 |
| 19933 | 296233.08 | 6125394.46 |
| 19934 | 296098.78 | 6125476.68 |
| 19935 | 296121.06 | 6125291.69 |
| 19936 | 296022.97 | 6125364.02 |
| 19937 | 296025.53 | 6125433.99 |
| 19938 | 295765.18 | 6127941.28 |
| 19939 | 295889.96 | 6127866.01 |
| 19940 | 295871.66 | 6127735.48 |
| 19941 | 294328.89 | 6124823.56 |
| 19942 | 297542.61 | 6127096.06 |
| 19943 | 294170.01 | 6124841.35 |
| 19944 | 294112.48 | 6124685.71 |
| 19945 | 294143.66 | 6125490.91 |
| 19946 | 294059.44 | 6126818.68 |
| 19947 | 294335.23 | 6126311.48 |
| 19948 | 295033.67 | 6124763.56 |
| 19949 | 295012.89 | 6124694.17 |
| 19950 | 295031.59 | 6124782.98 |
| 19951 | 294993.36 | 6124796.65 |
| 19952 | 294979.77 | 6124758.59 |
| 19953 | 295013.04 | 6124851.79 |
| 19954 | 294733.36 | 6124877.32 |
| 19955 | 294301.24 | 6126402.58 |
| 19956 | 294345.89 | 6126391.53 |
| 19957 | 293768.22 | 6125399.02 |
| 19958 | 293773.06 | 6125407.56 |

|       |           |            |
|-------|-----------|------------|
| 19959 | 293759.81 | 6125355.20 |
| 19960 | 293798.09 | 6125335.64 |
| 19961 | 294307.59 | 6125615.94 |
| 19962 | 294535.82 | 6125533.43 |
| 19963 | 294524.24 | 6125501.10 |
| 19964 | 294546.55 | 6125565.74 |
| 19965 | 294273.32 | 6125959.03 |
| 19966 | 294299.10 | 6126154.53 |
| 19967 | 294315.74 | 6126233.58 |
| 19968 | 294271.86 | 6126284.69 |
| 19969 | 294333.04 | 6126269.65 |
| 19970 | 293591.63 | 6126872.05 |
| 19971 | 293598.91 | 6126873.70 |
| 19972 | 298078.74 | 6127567.26 |
| 19973 | 298071.51 | 6127555.68 |
| 19974 | 294291.04 | 6126858.51 |
| 19975 | 294108.16 | 6126878.67 |
| 19976 | 294298.69 | 6126894.01 |
| 19977 | 293932.59 | 6126935.69 |
| 19978 | 294292.99 | 6124940.84 |
| 19979 | 294275.25 | 6124675.70 |
| 19980 | 296238.11 | 6127653.48 |
| 19981 | 296183.86 | 6127656.56 |
| 19982 | 296887.80 | 6127454.27 |
| 19983 | 296984.27 | 6127448.00 |
| 19984 | 296834.86 | 6127469.79 |
| 19985 | 296888.43 | 6126567.89 |
| 19986 | 296735.76 | 6126533.06 |
| 19987 | 296868.83 | 6126413.59 |
| 19988 | 296886.81 | 6126335.62 |
| 19989 | 293620.00 | 6126803.27 |
| 19990 | 295847.48 | 6127125.87 |
| 19991 | 295839.21 | 6127025.10 |
| 19992 | 295401.38 | 6128348.46 |
| 19993 | 295350.87 | 6128351.06 |
| 19994 | 295690.44 | 6126114.50 |
| 19995 | 293793.52 | 6125635.11 |
| 19996 | 293806.90 | 6125659.70 |
| 19997 | 296147.27 | 6126059.56 |
| 19998 | 293514.70 | 6127177.46 |
| 19999 | 293685.12 | 6127170.07 |
| 20000 | 293963.32 | 6127226.58 |
| 20001 | 294538.27 | 6125080.81 |
| 20002 | 294538.90 | 6125082.70 |
| 20003 | 294493.52 | 6125096.74 |
| 20004 | 294494.11 | 6125098.66 |
| 20005 | 294447.58 | 6126629.07 |
| 20006 | 295331.65 | 6125936.26 |
| 20007 | 293766.90 | 6125055.87 |
| 20008 | 295534.15 | 6125600.03 |

|       |           |            |
|-------|-----------|------------|
| 20009 | 295562.95 | 6125609.90 |
| 20010 | 295512.73 | 6125530.36 |
| 20011 | 295510.58 | 6125545.56 |
| 20012 | 294001.17 | 6126605.30 |
| 20013 | 296941.58 | 6126342.99 |
| 20014 | 297107.19 | 6126416.01 |
| 20015 | 297024.93 | 6126302.04 |
| 20016 | 297034.24 | 6126246.21 |
| 20017 | 296066.39 | 6127201.75 |
| 20018 | 296058.09 | 6127134.27 |
| 20019 | 296085.49 | 6127662.59 |
| 20020 | 296172.63 | 6127204.06 |
| 20021 | 296186.94 | 6127203.79 |
| 20022 | 294210.83 | 6125879.46 |
| 20023 | 294224.49 | 6126097.99 |
| 20024 | 298228.17 | 6127608.25 |
| 20025 | 298228.92 | 6127610.11 |
| 20026 | 297740.35 | 6126912.43 |
| 20027 | 297740.71 | 6126914.40 |
| 20028 | 297790.03 | 6127125.84 |
| 20029 | 297791.65 | 6127127.02 |
| 20030 | 297788.44 | 6127124.63 |
| 20031 | 297759.50 | 6126818.45 |
| 20032 | 297759.13 | 6126816.49 |
| 20033 | 297811.79 | 6126808.79 |
| 20034 | 297809.83 | 6126809.15 |
| 20035 | 297772.96 | 6127236.04 |
| 20036 | 297773.31 | 6127238.01 |
| 20037 | 297783.29 | 6127234.15 |
| 20038 | 297782.93 | 6127232.19 |
| 20039 | 298282.83 | 6127859.06 |
| 20040 | 298420.52 | 6128069.99 |
| 20041 | 298635.28 | 6128064.55 |
| 20042 | 293734.52 | 6127874.00 |
| 20043 | 293737.26 | 6127871.66 |
| 20044 | 293822.32 | 6127850.47 |
| 20045 | 293108.59 | 6127029.87 |
| 20046 | 293108.50 | 6127031.87 |
| 20047 | 295168.95 | 6128381.01 |
| 20048 | 295170.94 | 6128380.85 |
| 20049 | 295168.73 | 6128379.02 |
| 20050 | 295249.74 | 6128375.24 |
| 20051 | 295251.73 | 6128375.10 |
| 20052 | 293939.80 | 6127016.40 |
| 20053 | 293941.79 | 6127016.17 |
| 20054 | 296194.02 | 6128088.93 |
| 20055 | 296196.00 | 6128088.71 |
| 20056 | 296263.90 | 6127752.96 |
| 20057 | 295867.12 | 6125713.13 |
| 20058 | 295869.10 | 6125713.42 |

|       |           |            |
|-------|-----------|------------|
| 20059 | 295842.25 | 6125861.84 |
| 20060 | 295967.81 | 6125879.17 |
| 20061 | 297509.69 | 6127210.76 |
| 20062 | 297514.72 | 6127236.07 |
| 20063 | 297499.43 | 6127155.47 |
| 20064 | 297476.68 | 6127374.31 |
| 20065 | 297477.65 | 6127379.22 |
| 20066 | 296948.20 | 6127445.74 |
| 20067 | 296919.49 | 6127449.79 |
| 20068 | 298059.71 | 6127535.99 |
| 20069 | 298047.90 | 6127516.28 |
| 20070 | 298169.21 | 6127556.21 |
| 20071 | 298193.81 | 6127619.32 |
| 20072 | 298194.54 | 6127621.19 |
| 20073 | 294928.74 | 6128052.89 |
| 20074 | 297205.21 | 6128179.29 |
| 20075 | 297236.96 | 6128171.44 |
| 20076 | 295983.01 | 6128021.05 |
| 20077 | 295988.97 | 6128020.32 |
| 20078 | 295992.94 | 6128057.34 |
| 20079 | 298511.17 | 6129157.31 |
| 20080 | 298544.02 | 6129153.48 |
| 20081 | 298055.66 | 6127505.07 |
| 20082 | 298053.00 | 6127500.84 |
| 20083 | 295076.50 | 6127975.99 |
| 20084 | 295140.22 | 6127970.17 |
| 20085 | 295254.83 | 6126722.72 |
| 20086 | 293919.87 | 6127268.89 |
| 20087 | 295396.98 | 6126451.83 |
| 20088 | 293180.83 | 6127373.17 |
| 20089 | 296019.66 | 6125284.28 |
| 20090 | 296065.85 | 6125228.26 |
| 20091 | 296460.13 | 6128419.87 |
| 20092 | 296463.84 | 6128449.64 |
| 20093 | 296626.45 | 6128420.54 |
| 20094 | 296616.09 | 6128349.31 |
| 20095 | 296553.51 | 6128280.05 |
| 20096 | 296573.68 | 6128277.15 |
| 20097 | 296543.44 | 6128407.44 |
| 20098 | 296547.13 | 6128437.21 |
| 20099 | 296584.71 | 6128395.75 |
| 20100 | 296588.56 | 6128425.50 |
| 20101 | 296578.77 | 6128396.62 |
| 20102 | 296710.91 | 6127737.94 |
| 20103 | 296755.62 | 6127732.85 |
| 20104 | 296709.32 | 6127726.05 |
| 20105 | 295881.75 | 6128384.90 |
| 20106 | 295872.79 | 6128304.44 |
| 20107 | 295593.20 | 6128249.13 |
| 20108 | 295560.53 | 6128253.76 |

|       |           |            |
|-------|-----------|------------|
| 20109 | 296248.40 | 6128174.14 |
| 20110 | 296638.82 | 6126615.52 |
| 20111 | 296645.47 | 6126616.85 |
| 20112 | 296628.58 | 6126665.42 |
| 20113 | 296684.75 | 6126675.10 |
| 20114 | 296611.04 | 6126748.21 |
| 20115 | 296689.48 | 6126763.81 |
| 20116 | 299950.29 | 6128217.52 |
| 20117 | 296012.82 | 6128516.03 |
| 20118 | 295999.89 | 6128517.34 |
| 20119 | 296131.68 | 6128499.46 |
| 20120 | 296169.25 | 6128493.84 |
| 20121 | 296094.11 | 6128505.31 |
| 20122 | 294960.23 | 6125179.70 |
| 20123 | 294943.02 | 6125335.14 |
| 20124 | 294868.57 | 6125325.95 |
| 20125 | 294177.71 | 6125204.74 |
| 20126 | 295665.35 | 6124995.96 |
| 20127 | 298872.26 | 6128071.04 |
| 20128 | 298837.00 | 6128078.31 |
| 20129 | 298821.14 | 6128114.48 |
| 20130 | 298853.37 | 6128107.40 |
| 20131 | 298694.12 | 6128956.90 |
| 20132 | 298680.34 | 6128883.98 |
| 20133 | 297457.45 | 6127272.26 |
| 20134 | 297456.09 | 6127262.63 |
| 20135 | 297560.32 | 6127227.79 |
| 20136 | 297565.07 | 6127253.35 |
| 20137 | 294728.46 | 6125168.45 |
| 20138 | 294620.82 | 6125202.80 |
| 20139 | 298503.58 | 6127817.49 |
| 20140 | 295297.49 | 6126309.16 |
| 20141 | 297342.60 | 6126315.24 |
| 20142 | 297348.72 | 6126297.26 |
| 20143 | 294555.11 | 6127449.04 |
| 20144 | 295319.48 | 6128151.84 |
| 20145 | 295358.85 | 6128148.94 |
| 20147 | 298897.46 | 6128131.86 |
| 20148 | 298899.97 | 6128143.59 |
| 20149 | 298808.94 | 6127961.25 |
| 20150 | 298836.54 | 6128076.37 |
| 20151 | 297709.22 | 6126995.03 |
| 20152 | 297718.01 | 6127045.34 |
| 20153 | 297558.36 | 6127228.15 |
| 20154 | 297546.67 | 6127146.95 |
| 20155 | 297595.01 | 6127138.36 |
| 20156 | 297563.11 | 6127253.70 |
| 20157 | 298303.54 | 6127702.05 |
| 20158 | 298325.13 | 6127755.05 |
| 20159 | 294975.47 | 6125031.18 |



|       |           |            |
|-------|-----------|------------|
| 20160 | 294796.86 | 6125526.35 |
| 20161 | 297457.27 | 6127422.61 |
| 20162 | 297465.80 | 6127421.28 |
| 20163 | 298652.71 | 6128212.21 |
| 20164 | 298647.68 | 6128190.79 |
| 20165 | 295300.99 | 6127904.86 |
| 20166 | 295346.37 | 6127864.11 |
| 20167 | 295342.43 | 6128274.37 |
| 20168 | 295331.99 | 6127285.49 |
| 20169 | 295341.07 | 6127395.21 |
| 20170 | 295341.23 | 6127397.20 |
| 20171 | 295270.60 | 6128278.86 |
| 20172 | 295262.50 | 6128201.98 |
| 20173 | 295179.89 | 6125934.31 |
| 20174 | 295332.24 | 6125931.43 |
| 20175 | 295319.36 | 6128149.84 |
| 20176 | 295310.78 | 6128009.46 |
| 20177 | 294733.44 | 6128274.89 |
| 20178 | 294728.15 | 6128320.00 |
| 20179 | 298907.42 | 6128063.89 |
| 20180 | 298942.55 | 6128056.06 |
| 20181 | 298899.41 | 6128131.45 |
| 20182 | 298962.04 | 6128118.29 |
| 20183 | 295260.89 | 6128155.31 |
| 20184 | 295262.64 | 6128155.15 |
| 20185 | 295262.29 | 6128199.99 |
| 20186 | 295222.52 | 6128202.69 |
| 20187 | 295801.38 | 6126374.88 |
| 20188 | 295840.66 | 6125874.22 |
| 20189 | 297701.96 | 6126664.89 |
| 20190 | 294446.75 | 6125114.52 |
| 20191 | 294460.30 | 6124885.85 |
| 20192 | 294580.82 | 6124887.87 |
| 20193 | 294568.01 | 6125006.39 |
| 20194 | 294548.89 | 6124952.18 |
| 20195 | 294582.30 | 6125046.98 |
| 20196 | 294909.84 | 6127017.06 |
| 20197 | 294909.05 | 6126997.55 |
| 20198 | 298381.79 | 6127474.28 |
| 20199 | 298390.20 | 6127471.06 |
| 20200 | 298406.17 | 6127536.81 |
| 20201 | 297892.96 | 6127177.28 |
| 20202 | 297897.67 | 6127175.73 |
| 20203 | 297884.43 | 6127120.02 |
| 20204 | 297823.86 | 6127250.82 |
| 20205 | 297835.12 | 6127313.74 |
| 20206 | 297820.06 | 6127229.59 |
| 20207 | 297602.01 | 6126752.49 |
| 20208 | 297611.10 | 6126802.67 |
| 20209 | 294827.81 | 6125279.18 |

|       |           |            |
|-------|-----------|------------|
| 20210 | 294873.51 | 6125284.37 |
| 20211 | 294827.20 | 6125267.05 |
| 20212 | 294867.35 | 6125271.33 |
| 20213 | 294979.47 | 6127513.07 |
| 20214 | 294986.10 | 6127570.69 |
| 20215 | 297604.80 | 6127082.96 |
| 20216 | 297605.18 | 6127084.93 |
| 20217 | 297660.93 | 6127074.93 |
| 20218 | 297604.58 | 6127189.69 |
| 20219 | 294813.75 | 6127287.58 |
| 20220 | 294871.49 | 6127282.08 |
| 20221 | 294812.07 | 6127264.73 |
| 20222 | 294909.92 | 6127259.44 |
| 20223 | 294808.13 | 6127270.99 |
| 20224 | 294855.21 | 6127266.77 |
| 20225 | 295220.70 | 6125790.43 |
| 20226 | 295467.92 | 6125822.77 |
| 20227 | 294778.27 | 6127903.82 |
| 20228 | 298406.90 | 6127538.67 |
| 20229 | 298339.80 | 6127490.38 |
| 20230 | 298364.38 | 6127553.41 |
| 20231 | 294984.27 | 6126668.02 |
| 20232 | 294999.01 | 6126536.41 |
| 20233 | 294774.89 | 6127445.35 |
| 20234 | 294775.16 | 6127408.50 |
| 20235 | 295749.62 | 6127702.79 |
| 20236 | 295868.44 | 6127694.23 |
| 20237 | 295866.44 | 6127694.38 |
| 20238 | 294701.27 | 6125673.61 |
| 20239 | 296761.87 | 6128350.70 |
| 20240 | 297051.09 | 6127864.90 |
| 20241 | 297050.90 | 6127862.91 |
| 20242 | 297298.56 | 6128197.07 |
| 20243 | 297300.51 | 6128196.66 |
| 20244 | 297299.04 | 6128199.01 |
| 20245 | 297469.76 | 6128143.05 |
| 20246 | 297472.03 | 6128144.54 |
| 20247 | 298984.84 | 6128157.28 |
| 20248 | 298986.73 | 6128156.60 |
| 20249 | 295974.73 | 6127727.63 |
| 20250 | 295972.73 | 6127727.67 |
| 20251 | 295974.96 | 6127729.62 |
| 20252 | 294865.22 | 6127084.00 |
| 20253 | 294865.17 | 6127086.00 |
| 20254 | 296145.29 | 6126059.28 |
| 20255 | 296015.24 | 6126808.24 |
| 20256 | 296013.25 | 6126808.02 |
| 20257 | 296331.14 | 6126064.38 |
| 20258 | 296402.35 | 6126077.71 |
| 20259 | 296404.35 | 6126077.71 |

|       |           |            |
|-------|-----------|------------|
| 20260 | 296348.79 | 6126255.56 |
| 20261 | 296121.37 | 6126288.70 |
| 20262 | 296116.67 | 6126294.52 |
| 20263 | 296105.74 | 6126416.94 |
| 20264 | 295528.95 | 6126347.34 |
| 20265 | 295528.69 | 6126349.33 |
| 20266 | 295195.01 | 6127249.56 |
| 20267 | 295195.24 | 6127247.57 |
| 20268 | 296233.29 | 6125392.47 |
| 20269 | 296233.55 | 6125390.49 |
| 20270 | 296149.48 | 6126042.44 |
| 20271 | 296151.47 | 6126042.69 |
| 20272 | 296167.09 | 6125903.41 |
| 20273 | 295526.01 | 6127220.65 |
| 20274 | 295526.32 | 6127218.68 |
| 20275 | 295571.86 | 6127378.73 |
| 20276 | 295681.88 | 6127371.00 |
| 20277 | 296123.05 | 6125291.93 |
| 20278 | 296119.09 | 6125291.34 |
| 20279 | 297190.19 | 6126896.30 |
| 20280 | 297190.35 | 6126894.31 |
| 20281 | 297172.03 | 6126444.92 |
| 20282 | 297171.62 | 6126446.88 |
| 20283 | 299192.15 | 6128329.43 |
| 20284 | 297316.61 | 6128269.87 |
| 20285 | 297305.79 | 6128195.55 |
| 20286 | 297336.85 | 6128188.40 |
| 20287 | 297368.42 | 6128139.89 |
| 20288 | 297352.33 | 6128073.94 |
| 20289 | 298380.92 | 6127549.22 |
| 20290 | 298381.67 | 6127551.07 |
| 20291 | 298423.41 | 6127652.93 |
| 20292 | 294770.04 | 6127148.89 |
| 20293 | 294761.01 | 6127266.73 |
| 20294 | 293030.79 | 6126983.53 |
| 20295 | 293030.22 | 6126950.45 |
| 20296 | 295214.45 | 6125249.97 |
| 20297 | 295228.69 | 6125245.27 |
| 20298 | 298344.35 | 6129176.58 |
| 20299 | 298377.22 | 6129172.78 |
| 20300 | 296893.74 | 6128771.16 |
| 20301 | 298697.93 | 6127715.72 |
| 20302 | 298725.80 | 6127807.98 |
| 20303 | 296980.38 | 6127729.11 |
| 20304 | 296983.91 | 6127760.23 |
| 20305 | 297022.18 | 6127707.58 |
| 20306 | 297062.65 | 6127700.36 |
| 20307 | 299026.15 | 6128299.45 |
| 20308 | 299152.72 | 6128262.23 |
| 20309 | 297027.90 | 6127760.22 |

|       |           |            |
|-------|-----------|------------|
| 20310 | 297022.39 | 6127709.57 |
| 20311 | 293439.17 | 6126900.18 |
| 20312 | 293479.17 | 6126899.94 |
| 20313 | 293416.17 | 6126900.32 |
| 20314 | 298679.93 | 6128881.85 |
| 20315 | 298717.51 | 6128874.75 |
| 20316 | 298601.33 | 6128896.71 |
| 20317 | 298424.61 | 6129045.59 |
| 20318 | 298417.06 | 6129047.05 |
| 20319 | 298332.97 | 6128938.65 |
| 20320 | 298365.39 | 6128932.53 |
| 20321 | 297410.35 | 6126852.68 |
| 20322 | 297394.24 | 6127065.00 |
| 20323 | 297399.12 | 6126993.17 |
| 20324 | 298054.29 | 6127138.95 |
| 20325 | 298265.07 | 6127091.31 |
| 20326 | 298265.51 | 6127093.26 |
| 20327 | 298292.85 | 6127214.19 |
| 20328 | 298298.34 | 6127083.79 |
| 20329 | 298300.83 | 6127083.23 |
| 20330 | 294657.75 | 6127572.83 |
| 20331 | 293825.90 | 6127728.12 |
| 20332 | 293823.16 | 6127724.04 |
| 20333 | 298409.71 | 6129167.01 |
| 20334 | 299004.81 | 6128226.93 |
| 20335 | 293632.45 | 6127536.81 |
| 20336 | 293676.19 | 6127683.63 |
| 20337 | 293707.53 | 6127713.48 |
| 20338 | 293735.72 | 6127810.65 |
| 20339 | 295937.85 | 6127356.37 |
| 20340 | 294958.71 | 6126844.71 |
| 20341 | 296810.50 | 6126277.33 |
| 20342 | 296808.25 | 6126282.29 |
| 20343 | 297247.12 | 6127843.70 |
| 20344 | 297239.37 | 6127775.15 |
| 20345 | 297294.72 | 6127838.28 |
| 20346 | 297311.78 | 6127836.36 |
| 20347 | 295952.48 | 6127222.70 |
| 20348 | 295952.68 | 6127208.01 |
| 20349 | 298127.07 | 6127720.63 |
| 20350 | 293726.39 | 6126727.30 |
| 20351 | 293726.13 | 6126725.32 |
| 20352 | 293847.72 | 6126711.07 |
| 20353 | 293847.46 | 6126709.09 |
| 20354 | 295179.56 | 6128480.75 |
| 20355 | 294895.39 | 6128584.71 |
| 20356 | 294942.26 | 6128576.77 |
| 20357 | 295038.49 | 6128551.46 |
| 20358 | 293068.58 | 6127028.17 |
| 20359 | 293068.49 | 6127030.17 |

|       |           |            |
|-------|-----------|------------|
| 20360 | 295158.71 | 6125092.30 |
| 20361 | 295156.73 | 6125092.02 |
| 20362 | 295161.93 | 6124900.47 |
| 20363 | 295161.81 | 6124937.47 |
| 20364 | 295020.03 | 6125076.50 |
| 20365 | 295010.40 | 6125185.62 |
| 20366 | 295008.41 | 6125185.38 |
| 20367 | 294765.54 | 6125252.60 |
| 20368 | 294764.88 | 6125250.72 |
| 20369 | 294766.26 | 6125254.47 |
| 20370 | 296873.58 | 6128044.63 |
| 20371 | 296871.59 | 6128044.82 |
| 20372 | 296712.32 | 6128059.92 |
| 20373 | 296714.31 | 6128059.73 |
| 20374 | 296881.64 | 6128088.86 |
| 20375 | 296879.65 | 6128089.06 |
| 20376 | 296719.45 | 6128105.04 |
| 20377 | 296721.44 | 6128104.85 |
| 20378 | 296726.75 | 6128149.87 |
| 20379 | 296728.74 | 6128149.64 |
| 20380 | 295436.59 | 6127055.42 |
| 20381 | 295436.86 | 6127053.44 |
| 20382 | 295436.27 | 6127057.40 |
| 20383 | 295549.99 | 6127065.85 |
| 20384 | 295548.00 | 6127065.65 |
| 20385 | 295845.49 | 6127126.02 |
| 20386 | 297297.80 | 6128305.84 |
| 20387 | 297298.33 | 6128307.77 |
| 20388 | 297229.33 | 6128321.71 |
| 20389 | 297229.87 | 6128323.64 |
| 20390 | 297200.85 | 6128328.31 |
| 20391 | 297202.79 | 6128327.86 |
| 20392 | 297219.43 | 6128395.00 |
| 20393 | 297217.51 | 6128395.56 |
| 20394 | 298758.74 | 6129082.08 |
| 20395 | 298760.70 | 6129081.71 |
| 20396 | 298160.29 | 6128971.29 |
| 20397 | 298158.32 | 6128971.66 |
| 20398 | 298270.43 | 6127712.78 |
| 20399 | 297811.34 | 6126806.84 |
| 20400 | 298448.93 | 6128108.60 |
| 20401 | 298450.89 | 6128108.17 |
| 20402 | 293909.65 | 6127840.36 |
| 20403 | 293908.58 | 6127839.12 |
| 20404 | 295937.55 | 6127868.69 |
| 20405 | 295567.87 | 6127379.02 |
| 20406 | 295326.59 | 6128513.97 |
| 20407 | 295329.02 | 6128556.46 |
| 20408 | 295185.65 | 6128537.22 |
| 20409 | 295189.17 | 6128573.05 |

|       |           |            |
|-------|-----------|------------|
| 20410 | 295235.25 | 6128534.63 |
| 20411 | 295187.65 | 6128537.12 |
| 20412 | 295279.50 | 6128476.38 |
| 20413 | 296963.27 | 6127709.51 |
| 20414 | 297042.47 | 6127777.51 |
| 20415 | 297068.93 | 6127749.66 |
| 20416 | 297986.29 | 6127788.63 |
| 20417 | 298012.92 | 6127826.73 |
| 20418 | 298012.02 | 6127828.75 |
| 20419 | 298141.52 | 6127641.53 |
| 20420 | 298143.38 | 6127640.81 |
| 20421 | 295987.21 | 6127913.28 |
| 20422 | 295987.42 | 6127915.26 |
| 20423 | 293684.35 | 6127610.67 |
| 20424 | 293613.16 | 6127513.48 |
| 20425 | 293651.34 | 6127474.60 |
| 20426 | 293638.16 | 6127721.09 |
| 20427 | 293527.07 | 6126442.24 |
| 20428 | 293845.54 | 6126711.36 |
| 20429 | 295993.44 | 6125773.18 |
| 20430 | 295495.65 | 6127636.38 |
| 20431 | 295496.36 | 6127482.41 |
| 20432 | 295516.78 | 6127314.02 |
| 20433 | 295415.11 | 6127228.76 |
| 20434 | 295415.33 | 6127226.77 |
| 20435 | 297025.04 | 6127376.22 |
| 20436 | 295331.93 | 6125210.04 |
| 20437 | 295332.08 | 6125210.35 |
| 20438 | 295303.73 | 6124866.99 |
| 20439 | 295409.91 | 6128384.05 |
| 20440 | 298333.34 | 6128940.62 |
| 20441 | 293807.37 | 6126716.45 |
| 20442 | 293807.11 | 6126714.47 |
| 20443 | 294990.93 | 6128559.52 |
| 20444 | 295628.74 | 6126478.17 |
| 20445 | 297987.31 | 6127413.56 |
| 20446 | 297324.80 | 6127834.86 |
| 20447 | 295987.00 | 6127911.29 |
| 20448 | 296028.65 | 6127976.67 |
| 20449 | 296028.43 | 6127974.69 |
| 20450 | 296074.42 | 6127972.13 |
| 20451 | 296120.16 | 6127967.32 |
| 20452 | 296166.41 | 6127962.46 |
| 20453 | 296166.18 | 6127960.47 |
| 20454 | 296151.49 | 6125899.85 |
| 20455 | 296151.26 | 6125901.83 |
| 20456 | 296151.73 | 6125897.86 |
| 20457 | 296149.78 | 6125914.48 |
| 20458 | 296151.77 | 6125914.71 |
| 20459 | 295793.26 | 6125324.91 |

|       |           |            |
|-------|-----------|------------|
| 20460 | 295793.39 | 6125322.92 |
| 20461 | 295839.04 | 6127023.11 |
| 20462 | 297473.30 | 6128131.77 |
| 20463 | 297471.35 | 6128132.25 |
| 20464 | 298392.41 | 6128927.42 |
| 20465 | 295235.44 | 6128536.63 |
| 20466 | 293766.92 | 6126721.85 |
| 20467 | 293766.66 | 6126719.86 |
| 20468 | 293031.53 | 6127026.60 |
| 20469 | 293031.50 | 6127024.60 |
| 20470 | 297043.72 | 6128693.40 |
| 20471 | 297044.13 | 6128695.36 |
| 20472 | 297122.03 | 6128677.09 |
| 20473 | 297122.44 | 6128679.04 |
| 20474 | 297161.19 | 6128668.93 |
| 20475 | 297161.60 | 6128670.89 |
| 20476 | 297082.88 | 6128685.24 |
| 20477 | 297083.28 | 6128687.20 |
| 20478 | 296877.54 | 6127980.39 |
| 20479 | 296879.53 | 6127980.18 |
| 20480 | 297334.21 | 6128297.48 |
| 20481 | 297334.77 | 6128299.40 |
| 20482 | 298747.74 | 6127698.97 |
| 20483 | 298697.35 | 6127713.80 |
| 20484 | 298319.15 | 6127918.71 |
| 20485 | 298321.10 | 6127918.29 |
| 20486 | 298389.44 | 6127229.20 |
| 20487 | 298389.78 | 6127231.18 |
| 20488 | 298392.06 | 6127244.50 |
| 20489 | 298391.72 | 6127242.53 |
| 20490 | 298933.65 | 6128018.10 |
| 20491 | 298935.59 | 6128017.63 |
| 20492 | 298986.46 | 6128079.45 |
| 20493 | 298986.88 | 6128081.40 |
| 20494 | 298710.89 | 6128201.96 |
| 20495 | 298710.46 | 6128200.01 |
| 20496 | 294770.84 | 6127290.35 |
| 20497 | 294763.01 | 6127266.72 |
| 20498 | 294776.00 | 6127266.65 |
| 20499 | 294777.99 | 6127266.54 |
| 20500 | 294760.88 | 6127271.00 |
| 20501 | 294758.88 | 6127271.15 |
| 20502 | 294677.81 | 6127179.91 |
| 20503 | 295228.03 | 6125243.39 |
| 20504 | 295220.44 | 6125355.98 |
| 20505 | 293629.89 | 6127539.81 |
| 20506 | 294470.43 | 6127198.79 |
| 20507 | 294470.57 | 6127200.78 |
| 20508 | 294493.49 | 6127309.70 |
| 20509 | 294493.62 | 6127311.70 |

|       |           |            |
|-------|-----------|------------|
| 20510 | 294999.23 | 6126534.43 |
| 20511 | 294701.90 | 6126568.29 |
| 20512 | 294699.94 | 6126568.66 |
| 20513 | 295728.90 | 6125848.47 |
| 20514 | 295635.32 | 6125547.14 |
| 20515 | 295626.30 | 6125612.53 |
| 20516 | 296206.59 | 6127220.24 |
| 20517 | 296208.59 | 6127220.22 |
| 20518 | 295234.94 | 6127836.42 |
| 20519 | 295233.29 | 6127837.56 |
| 20520 | 295134.48 | 6127876.81 |
| 20521 | 295132.49 | 6127876.97 |
| 20522 | 295138.33 | 6127923.15 |
| 20523 | 295136.34 | 6127923.33 |
| 20524 | 295142.21 | 6127969.99 |
| 20525 | 295301.59 | 6127240.26 |
| 20526 | 295301.79 | 6127238.27 |
| 20527 | 295088.75 | 6126835.78 |
| 20528 | 295276.50 | 6126713.05 |
| 20529 | 293022.53 | 6126815.58 |
| 20530 | 293044.40 | 6126817.92 |
| 20531 | 295468.18 | 6128264.83 |
| 20532 | 295462.31 | 6128223.41 |
| 20533 | 295324.30 | 6128474.39 |
| 20534 | 293140.45 | 6131257.62 |
| 20535 | 297815.19 | 6126899.27 |
| 20536 | 298208.12 | 6129046.71 |
| 20537 | 298177.66 | 6129052.47 |
| 20538 | 296891.04 | 6127767.66 |
| 20539 | 297078.02 | 6127862.51 |
| 20540 | 295757.79 | 6128691.65 |
| 20541 | 295667.89 | 6128695.78 |
| 20542 | 297190.26 | 6127850.17 |
| 20543 | 297195.46 | 6127849.57 |
| 20544 | 297119.24 | 6127113.86 |
| 20545 | 297108.28 | 6127031.78 |
| 20546 | 297135.87 | 6127028.00 |
| 20547 | 294763.39 | 6127868.15 |
| 20548 | 294763.90 | 6127747.90 |
| 20549 | 297885.41 | 6127706.92 |
| 20550 | 297724.95 | 6127475.18 |
| 20551 | 299129.42 | 6128229.68 |
| 20552 | 299107.28 | 6128196.80 |
| 20553 | 294857.40 | 6128063.03 |
| 20554 | 294877.71 | 6128060.96 |
| 20555 | 294861.80 | 6128106.20 |
| 20556 | 297259.55 | 6126281.39 |
| 20557 | 297266.68 | 6126239.43 |
| 20558 | 297295.42 | 6126265.53 |
| 20559 | 296820.49 | 6126254.41 |



|       |           |            |
|-------|-----------|------------|
| 20560 | 296836.75 | 6126219.82 |
| 20561 | 298002.73 | 6127742.90 |
| 20562 | 297989.19 | 6127789.49 |
| 20563 | 298140.42 | 6127639.85 |
| 20564 | 293620.32 | 6127443.84 |
| 20565 | 295511.06 | 6127383.65 |
| 20566 | 298900.72 | 6128955.65 |
| 20567 | 295224.90 | 6127246.93 |
| 20568 | 298931.12 | 6128169.27 |
| 20569 | 293758.72 | 6127789.25 |
| 20570 | 293759.94 | 6127790.61 |
| 20571 | 293790.15 | 6127820.94 |
| 20572 | 293791.87 | 6127819.58 |
| 20573 | 293761.64 | 6127911.13 |
| 20574 | 293763.68 | 6127908.81 |
| 20575 | 293706.59 | 6127833.66 |
| 20576 | 298808.48 | 6127959.31 |
| 20577 | 296845.23 | 6128735.58 |
| 20578 | 296845.65 | 6128737.54 |
| 20579 | 295254.53 | 6126724.70 |
| 20580 | 293684.72 | 6127172.03 |
| 20581 | 295000.62 | 6128301.78 |
| 20582 | 295000.74 | 6128303.78 |
| 20583 | 295002.08 | 6128301.66 |
| 20584 | 294730.15 | 6128319.94 |
| 20585 | 294044.14 | 6127719.92 |
| 20586 | 294046.12 | 6127719.69 |
| 20587 | 295418.39 | 6128426.62 |
| 20588 | 295358.15 | 6128430.51 |
| 20589 | 295357.78 | 6128426.52 |
| 20590 | 294803.29 | 6128325.11 |
| 20591 | 294805.29 | 6128324.94 |
| 20592 | 295310.65 | 6128007.46 |
| 20593 | 295310.55 | 6128005.46 |
| 20594 | 295327.82 | 6127936.77 |
| 20595 | 295196.78 | 6128015.05 |
| 20596 | 295145.69 | 6128013.36 |
| 20597 | 293807.86 | 6125661.46 |
| 20598 | 293870.51 | 6125691.39 |
| 20599 | 296407.02 | 6125827.17 |
| 20600 | 296409.02 | 6125827.06 |
| 20601 | 297001.63 | 6128702.17 |
| 20602 | 297002.03 | 6128704.13 |
| 20603 | 296881.45 | 6128017.13 |
| 20604 | 296883.44 | 6128016.91 |
| 20605 | 298853.81 | 6128109.35 |
| 20606 | 294774.00 | 6127266.66 |
| 20607 | 294854.93 | 6128038.79 |
| 20608 | 294855.10 | 6128040.50 |
| 20609 | 295208.66 | 6127822.68 |

|       |           |            |
|-------|-----------|------------|
| 20610 | 296298.32 | 6125763.71 |
| 20611 | 294858.55 | 6124969.80 |
| 20612 | 294857.89 | 6124967.92 |
| 20613 | 295796.81 | 6128602.01 |
| 20614 | 295794.82 | 6128602.14 |
| 20615 | 298526.80 | 6127615.50 |
| 20616 | 298568.34 | 6127650.18 |
| 20617 | 298530.59 | 6127613.94 |
| 20618 | 298398.24 | 6128020.37 |
| 20619 | 298525.06 | 6127993.36 |
| 20620 | 296862.65 | 6128731.83 |
| 20621 | 296932.84 | 6128762.74 |
| 20622 | 293985.85 | 6127821.16 |
| 20623 | 294010.45 | 6127845.69 |
| 20624 | 293982.88 | 6127824.07 |
| 20625 | 293952.27 | 6127851.88 |
| 20626 | 293925.72 | 6127827.36 |
| 20627 | 293918.05 | 6127819.15 |
| 20628 | 298175.06 | 6129196.17 |
| 20629 | 298202.19 | 6129193.03 |
| 20630 | 298142.19 | 6129199.97 |
| 20631 | 295207.83 | 6128377.99 |
| 20632 | 295208.26 | 6128379.94 |
| 20633 | 295270.81 | 6128280.85 |
| 20634 | 297738.11 | 6127242.23 |
| 20635 | 297780.42 | 6127277.67 |
| 20636 | 297843.94 | 6126951.12 |
| 20637 | 294949.20 | 6125280.16 |
| 20638 | 294995.88 | 6125285.61 |
| 20639 | 295998.82 | 6127979.92 |
| 20640 | 295999.14 | 6128111.52 |
| 20641 | 296002.23 | 6128133.44 |
| 20642 | 296080.71 | 6128101.28 |
| 20643 | 296916.89 | 6127617.51 |
| 20644 | 296897.69 | 6127514.18 |
| 20645 | 296918.85 | 6127617.12 |
| 20646 | 296956.46 | 6127609.72 |
| 20647 | 296879.83 | 6127398.85 |
| 20648 | 296903.86 | 6127395.45 |
| 20649 | 295124.46 | 6125361.36 |
| 20650 | 295087.31 | 6125232.24 |
| 20651 | 295136.89 | 6125238.70 |
| 20652 | 297374.04 | 6128288.26 |
| 20653 | 297351.75 | 6128357.59 |
| 20654 | 297442.45 | 6128272.41 |
| 20655 | 297421.33 | 6128277.30 |
| 20656 | 297470.96 | 6128265.80 |
| 20657 | 297505.17 | 6128257.88 |
| 20658 | 297402.54 | 6128281.65 |
| 20659 | 297068.04 | 6128688.34 |

|       |           |            |
|-------|-----------|------------|
| 20660 | 297172.96 | 6128666.59 |
| 20661 | 294778.55 | 6127840.23 |
| 20662 | 294777.40 | 6127886.37 |
| 20663 | 294947.14 | 6128263.83 |
| 20664 | 294845.80 | 6128272.26 |
| 20665 | 294887.02 | 6128318.45 |
| 20666 | 294892.84 | 6128404.45 |
| 20667 | 298861.42 | 6128963.07 |
| 20668 | 298822.11 | 6128970.50 |
| 20669 | 296731.69 | 6128970.12 |
| 20670 | 297619.58 | 6126859.12 |
| 20671 | 297463.12 | 6126887.39 |
| 20672 | 297514.02 | 6126971.90 |
| 20673 | 293397.35 | 6126987.24 |
| 20674 | 293313.86 | 6127009.69 |
| 20675 | 293202.82 | 6127034.31 |
| 20676 | 293293.65 | 6126977.87 |
| 20677 | 293295.34 | 6126976.81 |
| 20678 | 298123.77 | 6129102.48 |
| 20679 | 298071.49 | 6129208.16 |
| 20680 | 298026.20 | 6129146.23 |
| 20681 | 298038.25 | 6129209.99 |
| 20682 | 298000.38 | 6129216.38 |
| 20683 | 298038.62 | 6129211.96 |
| 20684 | 296168.39 | 6127962.25 |
| 20685 | 295792.88 | 6125326.88 |
| 20686 | 298143.34 | 6127662.64 |
| 20687 | 298141.44 | 6127663.27 |
| 20688 | 298039.82 | 6127506.71 |
| 20689 | 298100.52 | 6127605.94 |
| 20690 | 298102.47 | 6127582.18 |
| 20691 | 298104.33 | 6127581.46 |
| 20692 | 298139.61 | 6127656.39 |
| 20693 | 298141.46 | 6127655.62 |
| 20694 | 293810.03 | 6127735.90 |
| 20695 | 293813.26 | 6127739.19 |
| 20696 | 293904.23 | 6127834.35 |
| 20697 | 293907.09 | 6127837.54 |
| 20698 | 293902.53 | 6127832.69 |
| 20699 | 293888.40 | 6127788.00 |
| 20700 | 293891.47 | 6127784.86 |
| 20701 | 293856.14 | 6127757.61 |
| 20702 | 293860.04 | 6127753.80 |
| 20703 | 293828.11 | 6127725.96 |
| 20704 | 293734.30 | 6127807.76 |
| 20705 | 293737.69 | 6127637.85 |
| 20706 | 293707.02 | 6127607.17 |
| 20707 | 293797.19 | 6127696.69 |
| 20708 | 293800.77 | 6127693.14 |
| 20709 | 293766.97 | 6127667.13 |

|       |           |            |
|-------|-----------|------------|
| 20710 | 293769.16 | 6127664.96 |
| 20711 | 298432.70 | 6128919.81 |
| 20712 | 298433.07 | 6128921.77 |
| 20713 | 295805.86 | 6126127.49 |
| 20714 | 295529.21 | 6126345.36 |
| 20715 | 295658.26 | 6126353.25 |
| 20716 | 295657.76 | 6126357.22 |
| 20717 | 295772.81 | 6126373.02 |
| 20718 | 295773.33 | 6126369.05 |
| 20719 | 295737.72 | 6126622.30 |
| 20720 | 295738.07 | 6126620.33 |
| 20721 | 295372.24 | 6126633.67 |
| 20722 | 295363.55 | 6126718.21 |
| 20723 | 295307.78 | 6127963.41 |
| 20724 | 295305.78 | 6127963.49 |
| 20725 | 295884.55 | 6128515.99 |
| 20726 | 295884.68 | 6128517.99 |
| 20727 | 295733.76 | 6128524.04 |
| 20728 | 295733.80 | 6128526.04 |
| 20729 | 295690.59 | 6128528.55 |
| 20730 | 295690.45 | 6128524.56 |
| 20731 | 294566.14 | 6124846.30 |
| 20732 | 294567.49 | 6124850.07 |
| 20733 | 296000.24 | 6128133.70 |
| 20734 | 295998.86 | 6128109.53 |
| 20735 | 295989.17 | 6125806.91 |
| 20736 | 296111.61 | 6125822.02 |
| 20737 | 296107.98 | 6125856.15 |
| 20738 | 295801.71 | 6128689.06 |
| 20739 | 294758.95 | 6127913.91 |
| 20740 | 294762.26 | 6127884.34 |
| 20741 | 297096.48 | 6127860.82 |
| 20742 | 296680.17 | 6127519.59 |
| 20743 | 295292.39 | 6128374.23 |
| 20744 | 295296.60 | 6128409.98 |
| 20745 | 297290.16 | 6128275.89 |
| 20746 | 296211.65 | 6127957.67 |
| 20747 | 296201.10 | 6127865.59 |
| 20748 | 297400.67 | 6128132.18 |
| 20749 | 298982.27 | 6128940.23 |
| 20750 | 299018.09 | 6128931.43 |
| 20751 | 293954.83 | 6127788.28 |
| 20752 | 293978.33 | 6127780.86 |
| 20753 | 296093.44 | 6127818.17 |
| 20754 | 296126.56 | 6127814.86 |
| 20755 | 296042.90 | 6128104.61 |
| 20756 | 298248.98 | 6127818.05 |
| 20757 | 297842.56 | 6127821.18 |
| 20758 | 296528.20 | 6127394.68 |
| 20759 | 295281.45 | 6127400.30 |

|       |           |            |
|-------|-----------|------------|
| 20760 | 297279.42 | 6127912.24 |
| 20761 | 297510.03 | 6128256.75 |
| 20762 | 298782.81 | 6128977.93 |
| 20763 | 297453.96 | 6126940.56 |
| 20764 | 293223.27 | 6127066.87 |
| 20765 | 293312.17 | 6127010.76 |
| 20766 | 293277.40 | 6126944.83 |
| 20767 | 298156.19 | 6129096.36 |
| 20768 | 298239.67 | 6127822.64 |
| 20769 | 298080.86 | 6127565.99 |
| 20770 | 295302.31 | 6127919.73 |
| 20771 | 295307.54 | 6127914.88 |
| 20772 | 294421.32 | 6127861.96 |
| 20773 | 295331.75 | 6128604.44 |
| 20774 | 293160.49 | 6126886.02 |
| 20775 | 293084.67 | 6126881.13 |
| 20776 | 295238.76 | 6128570.46 |
| 20777 | 295284.29 | 6128534.23 |
| 20778 | 295287.61 | 6128568.06 |
| 20779 | 295402.23 | 6128471.21 |
| 20780 | 296272.90 | 6128073.46 |
| 20781 | 297010.19 | 6128743.29 |
| 20782 | 297169.76 | 6128710.04 |
| 20783 | 295605.78 | 6128256.25 |
| 20784 | 295633.07 | 6128252.38 |
| 20785 | 295254.21 | 6128010.02 |
| 20786 | 295254.32 | 6128012.02 |
| 20787 | 295300.84 | 6127918.37 |
| 20788 | 295271.35 | 6127874.53 |
| 20789 | 295272.84 | 6127873.20 |
| 20790 | 295262.53 | 6128153.16 |
| 20791 | 295195.74 | 6127251.42 |
| 20792 | 298871.79 | 6128069.09 |
| 20793 | 298100.78 | 6127893.40 |
| 20794 | 298099.70 | 6127891.72 |
| 20795 | 298109.29 | 6127829.62 |
| 20796 | 298110.97 | 6127828.53 |
| 20797 | 297773.05 | 6127566.92 |
| 20798 | 297774.92 | 6127566.21 |
| 20799 | 297822.16 | 6127717.62 |
| 20800 | 297826.09 | 6127716.94 |
| 20801 | 295697.64 | 6126753.76 |
| 20802 | 295697.44 | 6126755.75 |
| 20803 | 295720.49 | 6126756.32 |
| 20804 | 295720.76 | 6126754.34 |
| 20805 | 298702.27 | 6127907.00 |
| 20806 | 298704.22 | 6127906.60 |
| 20807 | 298362.27 | 6127985.56 |
| 20808 | 298364.22 | 6127985.15 |
| 20809 | 298495.17 | 6127819.43 |

|       |           |            |
|-------|-----------|------------|
| 20810 | 298394.75 | 6128929.01 |
| 20811 | 298316.89 | 6129031.25 |
| 20812 | 298316.51 | 6129029.28 |
| 20813 | 298381.73 | 6129018.99 |
| 20814 | 298381.36 | 6129017.03 |
| 20815 | 298732.07 | 6128951.76 |
| 20816 | 298694.49 | 6128958.86 |
| 20817 | 296605.88 | 6126489.92 |
| 20818 | 296647.43 | 6126617.25 |
| 20819 | 296649.39 | 6126617.64 |
| 20820 | 296393.76 | 6126553.45 |
| 20821 | 296097.51 | 6126664.94 |
| 20822 | 296095.21 | 6126664.91 |
| 20823 | 296097.04 | 6126662.99 |
| 20824 | 298207.46 | 6127740.08 |
| 20825 | 297881.42 | 6127107.85 |
| 20826 | 297879.46 | 6127108.23 |
| 20827 | 297837.25 | 6127116.52 |
| 20828 | 297836.80 | 6127114.57 |
| 20829 | 297713.38 | 6127369.22 |
| 20830 | 297713.11 | 6127367.65 |
| 20831 | 297691.85 | 6127250.50 |
| 20832 | 297689.88 | 6127250.87 |
| 20833 | 297707.71 | 6127337.98 |
| 20834 | 297709.68 | 6127337.64 |
| 20835 | 296806.86 | 6128743.85 |
| 20836 | 296808.81 | 6128743.43 |
| 20837 | 293829.15 | 6126713.55 |
| 20838 | 293829.41 | 6126715.53 |
| 20839 | 293757.96 | 6126723.05 |
| 20840 | 293757.91 | 6126724.18 |
| 20841 | 297923.23 | 6127284.50 |
| 20842 | 297906.19 | 6127212.49 |
| 20843 | 294705.29 | 6127154.72 |
| 20844 | 294702.70 | 6127129.59 |
| 20845 | 296798.41 | 6127726.38 |
| 20846 | 296787.57 | 6127631.01 |
| 20847 | 296743.49 | 6127634.09 |
| 20848 | 296787.35 | 6127629.02 |
| 20849 | 298587.04 | 6127665.58 |
| 20850 | 298591.17 | 6127669.26 |
| 20851 | 298487.60 | 6127704.41 |
| 20852 | 299068.89 | 6128135.78 |
| 20853 | 299063.18 | 6128127.57 |
| 20854 | 294547.28 | 6127305.23 |
| 20855 | 295322.21 | 6126046.92 |
| 20856 | 299014.96 | 6128040.80 |
| 20857 | 298955.56 | 6128087.98 |
| 20858 | 295163.98 | 6124922.38 |
| 20859 | 295244.34 | 6124919.10 |

|       |           |            |
|-------|-----------|------------|
| 20860 | 295161.97 | 6124971.46 |
| 20861 | 295245.90 | 6124968.45 |
| 20862 | 295156.77 | 6125122.00 |
| 20863 | 295239.69 | 6125118.95 |
| 20864 | 295300.64 | 6128007.89 |
| 20865 | 294698.81 | 6125880.88 |
| 20866 | 294706.16 | 6126881.74 |
| 20867 | 294793.66 | 6126891.03 |
| 20868 | 294846.24 | 6127522.47 |
| 20869 | 294870.20 | 6127521.17 |
| 20870 | 295271.59 | 6127918.42 |
| 20871 | 295224.67 | 6127921.06 |
| 20872 | 297469.77 | 6127380.65 |
| 20873 | 296449.96 | 6128299.74 |
| 20874 | 296438.87 | 6128245.08 |
| 20875 | 296496.74 | 6128414.52 |
| 20876 | 296459.82 | 6128417.90 |
| 20877 | 296453.99 | 6128380.35 |
| 20878 | 296494.91 | 6128288.49 |
| 20879 | 295744.10 | 6126967.49 |
| 20880 | 295736.44 | 6126758.20 |
| 20881 | 296293.52 | 6127856.17 |
| 20882 | 296257.88 | 6127952.66 |
| 20883 | 296271.56 | 6127798.83 |
| 20884 | 296247.56 | 6127861.10 |
| 20885 | 296050.57 | 6128511.58 |
| 20886 | 295735.15 | 6127513.63 |
| 20887 | 295842.24 | 6127505.27 |
| 20888 | 296472.06 | 6128198.27 |
| 20889 | 296444.88 | 6128040.61 |
| 20890 | 294255.19 | 6124953.95 |
| 20891 | 294150.30 | 6124672.70 |
| 20892 | 296654.91 | 6128265.57 |
| 20893 | 296565.18 | 6126145.67 |
| 20894 | 296349.90 | 6126280.63 |
| 20895 | 296349.82 | 6126290.63 |
| 20896 | 296404.67 | 6126514.80 |
| 20897 | 296309.31 | 6126503.78 |
| 20898 | 295975.51 | 6126982.84 |
| 20899 | 295993.85 | 6126819.63 |
| 20900 | 296015.53 | 6126656.48 |
| 20901 | 295541.56 | 6127217.74 |
| 20902 | 295539.35 | 6127236.06 |
| 20903 | 296122.61 | 6127068.32 |
| 20904 | 296136.61 | 6127069.82 |
| 20905 | 294842.63 | 6126244.65 |
| 20906 | 294888.42 | 6126249.04 |
| 20907 | 294762.72 | 6125272.16 |
| 20908 | 295693.15 | 6127370.03 |
| 20909 | 295691.16 | 6127370.20 |

|       |           |            |
|-------|-----------|------------|
| 20910 | 296186.94 | 6127205.79 |
| 20911 | 296201.73 | 6127197.41 |
| 20912 | 296222.34 | 6127156.20 |
| 20913 | 296526.40 | 6127393.81 |
| 20914 | 296527.67 | 6127392.26 |
| 20915 | 295302.39 | 6126188.47 |
| 20916 | 295183.88 | 6126050.11 |
| 20917 | 295185.86 | 6126050.37 |
| 20918 | 294735.42 | 6128275.15 |
| 20919 | 294945.11 | 6128219.99 |
| 20920 | 294943.12 | 6128220.16 |
| 20921 | 294949.14 | 6128263.66 |
| 20922 | 295804.62 | 6126254.99 |
| 20923 | 295913.59 | 6126269.63 |
| 20924 | 296168.34 | 6127810.61 |
| 20925 | 296168.15 | 6127808.62 |
| 20926 | 297458.06 | 6127262.28 |
| 20927 | 297454.13 | 6127263.02 |
| 20928 | 297567.05 | 6127253.02 |
| 20929 | 297692.61 | 6126828.60 |
| 20930 | 293820.00 | 6127727.99 |
| 20931 | 293710.59 | 6127710.55 |
| 20932 | 299023.67 | 6128928.42 |
| 20933 | 299023.30 | 6128926.46 |
| 20934 | 297226.45 | 6128293.26 |
| 20935 | 297225.97 | 6128291.32 |
| 20936 | 298069.70 | 6127556.53 |
| 20937 | 298839.11 | 6128845.03 |
| 20938 | 293921.09 | 6127816.16 |
| 20939 | 296555.90 | 6125894.41 |
| 20940 | 293902.01 | 6125105.13 |
| 20941 | 294167.94 | 6126061.51 |
| 20942 | 297167.15 | 6128229.14 |
| 20943 | 297166.77 | 6128227.17 |
| 20944 | 297337.32 | 6128190.34 |
| 20945 | 295366.60 | 6126720.83 |
| 20946 | 295366.36 | 6126722.82 |
| 20947 | 295384.73 | 6126447.02 |
| 20948 | 294677.76 | 6127752.42 |
| 20949 | 293186.67 | 6131229.02 |
| 20950 | 298514.37 | 6128133.97 |
| 20951 | 298512.43 | 6128134.44 |
| 20952 | 298622.16 | 6128150.72 |
| 20953 | 298621.70 | 6128148.78 |
| 20954 | 298670.78 | 6128139.05 |
| 20955 | 298670.32 | 6128137.11 |
| 20956 | 297375.99 | 6128287.81 |
| 20957 | 297374.60 | 6128290.18 |
| 20958 | 295849.75 | 6127602.99 |
| 20959 | 295905.41 | 6127359.79 |



|       |           |            |
|-------|-----------|------------|
| 20960 | 298733.50 | 6129131.63 |
| 20961 | 295000.91 | 6125286.03 |
| 20962 | 294952.78 | 6128305.64 |
| 20963 | 297218.63 | 6128093.68 |
| 20964 | 298546.57 | 6127947.11 |
| 20965 | 298692.59 | 6127917.52 |
| 20966 | 297397.19 | 6128176.03 |
| 20967 | 293792.08 | 6127882.92 |
| 20968 | 297186.26 | 6128101.17 |
| 20969 | 297851.61 | 6126925.98 |
| 20970 | 297576.60 | 6126724.98 |
| 20971 | 294013.07 | 6124647.26 |
| 20972 | 294036.58 | 6124711.06 |
| 20973 | 294088.28 | 6124620.03 |
| 20974 | 294111.79 | 6124683.83 |
| 20975 | 294050.91 | 6124634.28 |
| 20976 | 294074.41 | 6124698.09 |
| 20977 | 294062.55 | 6124782.02 |
| 20978 | 295782.11 | 6125070.34 |
| 20979 | 297022.79 | 6127357.56 |
| 20980 | 296171.27 | 6125733.28 |
| 20981 | 296306.14 | 6125613.92 |
| 20982 | 296388.03 | 6125610.34 |
| 20983 | 294047.83 | 6125648.17 |
| 20984 | 296715.62 | 6127529.07 |
| 20985 | 296682.06 | 6127520.25 |
| 20986 | 296941.03 | 6128228.21 |
| 20987 | 296947.68 | 6128282.80 |
| 20988 | 296902.25 | 6128233.67 |
| 20989 | 296908.99 | 6128285.23 |
| 20990 | 295872.49 | 6125160.13 |
| 20991 | 295875.67 | 6125286.11 |
| 20992 | 295472.92 | 6125801.45 |
| 20993 | 295378.26 | 6125659.68 |
| 20994 | 295423.85 | 6125665.79 |
| 20995 | 295386.16 | 6125512.59 |
| 20996 | 295379.33 | 6125562.12 |
| 20997 | 296833.88 | 6127461.29 |
| 20998 | 296643.88 | 6128014.99 |
| 20999 | 296649.08 | 6128047.58 |
| 21000 | 296611.93 | 6127910.42 |
| 21001 | 296676.08 | 6127903.68 |
| 21002 | 296518.58 | 6127921.19 |
| 21003 | 296561.85 | 6127916.69 |
| 21004 | 296510.05 | 6127855.79 |
| 21005 | 296554.17 | 6127851.55 |
| 21006 | 294624.81 | 6125151.41 |
| 21007 | 294670.34 | 6125136.21 |
| 21008 | 294701.95 | 6125024.11 |
| 21009 | 294731.02 | 6125014.07 |

|       |           |            |
|-------|-----------|------------|
| 21010 | 294665.97 | 6124971.70 |
| 21011 | 294714.03 | 6124954.33 |
| 21012 | 295789.93 | 6128520.63 |
| 21013 | 295787.86 | 6128520.76 |
| 21014 | 295788.76 | 6128447.58 |
| 21015 | 295790.76 | 6128447.48 |
| 21016 | 295812.96 | 6128310.09 |
| 21017 | 295814.95 | 6128309.85 |
| 21018 | 295986.72 | 6128623.02 |
| 21019 | 295984.72 | 6128623.10 |
| 21020 | 296958.42 | 6127609.33 |
| 21021 | 296960.38 | 6127608.95 |
| 21022 | 297027.83 | 6127383.07 |
| 21023 | 294453.54 | 6125376.78 |
| 21024 | 294489.86 | 6125401.14 |
| 21025 | 294445.90 | 6125383.58 |
| 21026 | 294413.67 | 6125395.19 |
| 21027 | 294913.43 | 6125751.56 |
| 21028 | 296663.76 | 6127743.68 |
| 21029 | 296675.82 | 6127901.69 |
| 21030 | 294411.16 | 6124692.83 |
| 21031 | 294410.54 | 6124690.92 |
| 21032 | 294451.77 | 6124655.87 |
| 21033 | 294450.40 | 6124652.12 |
| 21034 | 296689.74 | 6128260.68 |
| 21035 | 296690.04 | 6128262.66 |
| 21036 | 296929.05 | 6126397.57 |
| 21037 | 297106.80 | 6126417.97 |
| 21038 | 296510.66 | 6128195.17 |
| 21039 | 296618.62 | 6127749.36 |
| 21040 | 295741.66 | 6127057.22 |
| 21041 | 295739.67 | 6127057.34 |
| 21042 | 294236.80 | 6126084.95 |
| 21043 | 294355.09 | 6126903.14 |
| 21044 | 294411.55 | 6126895.33 |
| 21045 | 293911.46 | 6127244.91 |
| 21046 | 296307.33 | 6126503.56 |
| 21047 | 296302.06 | 6126497.53 |
| 21048 | 295613.53 | 6125713.38 |
| 21049 | 294289.69 | 6125161.64 |
| 21050 | 297527.56 | 6127046.63 |
| 21051 | 297448.43 | 6126984.01 |
| 21052 | 297451.99 | 6126940.92 |
| 21053 | 295209.97 | 6127840.49 |
| 21054 | 295232.63 | 6127834.49 |
| 21055 | 295324.98 | 6125156.52 |
| 21056 | 298552.92 | 6128085.72 |
| 21057 | 298450.35 | 6128110.66 |
| 21058 | 298298.45 | 6127886.35 |
| 21059 | 298291.05 | 6127509.79 |

|       |           |            |
|-------|-----------|------------|
| 21060 | 295225.05 | 6125316.78 |
| 21061 | 297387.66 | 6126453.53 |
| 21062 | 297391.00 | 6126439.08 |
| 21063 | 296023.96 | 6127550.79 |
| 21064 | 296072.83 | 6127547.29 |
| 21065 | 296988.63 | 6127485.81 |
| 21066 | 296882.80 | 6127504.58 |
| 21067 | 296985.22 | 6127440.53 |
| 21068 | 296986.25 | 6127447.71 |
| 21069 | 295913.78 | 6127732.60 |
| 21070 | 295926.93 | 6127731.27 |
| 21071 | 295889.80 | 6127864.02 |
| 21072 | 295879.24 | 6127736.82 |
| 21073 | 295937.39 | 6127866.69 |
| 21074 | 295927.08 | 6127733.27 |
| 21075 | 296069.57 | 6127664.32 |
| 21076 | 295879.07 | 6127734.82 |
| 21077 | 295887.34 | 6127734.29 |
| 21078 | 297393.39 | 6126851.50 |
| 21079 | 297392.94 | 6126853.45 |
| 21080 | 295988.09 | 6127887.92 |
| 21081 | 295377.58 | 6128273.63 |
| 21082 | 295377.39 | 6128271.64 |
| 21083 | 295164.21 | 6128337.70 |
| 21084 | 295166.20 | 6128337.58 |
| 21085 | 295396.90 | 6128510.29 |
| 21086 | 295396.97 | 6128512.29 |
| 21087 | 296291.67 | 6128168.25 |
| 21088 | 296291.99 | 6128170.22 |
| 21089 | 296332.74 | 6128162.85 |
| 21090 | 296332.38 | 6128160.88 |
| 21091 | 294291.01 | 6125585.95 |
| 21092 | 294343.23 | 6125725.72 |
| 21093 | 294344.09 | 6125727.52 |
| 21094 | 294327.93 | 6125149.64 |
| 21095 | 296075.23 | 6126136.54 |
| 21096 | 293396.12 | 6127150.56 |
| 21097 | 293305.46 | 6127205.39 |
| 21098 | 293775.54 | 6126861.86 |
| 21099 | 293759.53 | 6126736.19 |
| 21100 | 293883.65 | 6126848.76 |
| 21101 | 293873.12 | 6126761.39 |
| 21102 | 296089.32 | 6126535.66 |
| 21103 | 296103.74 | 6126416.93 |
| 21104 | 296711.14 | 6127739.93 |
| 21105 | 296716.77 | 6127789.61 |
| 21106 | 295905.61 | 6127361.78 |
| 21107 | 295909.89 | 6127403.44 |
| 21108 | 297182.15 | 6127004.99 |
| 21109 | 297182.08 | 6127018.99 |

|       |           |            |
|-------|-----------|------------|
| 21110 | 297182.07 | 6127020.99 |
| 21111 | 297179.65 | 6127021.37 |
| 21112 | 295602.38 | 6128454.49 |
| 21113 | 295603.80 | 6128483.95 |
| 21114 | 293755.40 | 6127048.28 |
| 21115 | 293791.38 | 6127047.23 |
| 21116 | 295872.76 | 6127166.07 |
| 21117 | 295873.43 | 6127180.09 |
| 21118 | 295785.94 | 6125114.41 |
| 21119 | 295786.60 | 6125126.40 |
| 21120 | 295784.11 | 6125070.28 |
| 21121 | 295780.24 | 6124990.99 |
| 21122 | 293962.48 | 6127219.25 |
| 21123 | 293951.49 | 6127124.26 |
| 21124 | 295659.21 | 6126345.30 |
| 21125 | 295672.37 | 6126243.73 |
| 21126 | 295538.09 | 6126230.37 |
| 21127 | 295539.01 | 6126222.42 |
| 21128 | 296772.24 | 6127518.24 |
| 21129 | 296765.71 | 6127518.91 |
| 21130 | 296779.80 | 6127477.82 |
| 21131 | 296767.93 | 6127479.62 |
| 21132 | 296787.11 | 6127627.03 |
| 21133 | 296776.53 | 6127537.65 |
| 21134 | 296804.17 | 6127516.18 |
| 21135 | 293785.41 | 6124925.98 |
| 21136 | 293780.16 | 6124928.89 |
| 21137 | 293849.64 | 6124886.81 |
| 21138 | 293855.45 | 6124881.69 |
| 21139 | 294282.06 | 6127470.67 |
| 21140 | 294256.16 | 6127682.91 |
| 21141 | 293683.91 | 6125168.42 |
| 21142 | 293651.59 | 6125185.63 |
| 21143 | 294317.24 | 6126972.84 |
| 21144 | 294140.45 | 6126993.24 |
| 21145 | 294323.10 | 6124928.66 |
| 21146 | 294253.70 | 6124744.31 |
| 21147 | 293511.74 | 6127103.02 |
| 21148 | 293701.35 | 6127094.03 |
| 21149 | 293787.09 | 6125513.99 |
| 21150 | 294133.29 | 6127135.08 |
| 21151 | 293645.61 | 6125367.97 |
| 21152 | 293626.91 | 6125132.42 |
| 21153 | 293624.16 | 6125133.96 |
| 21154 | 293650.66 | 6125183.87 |
| 21155 | 293625.10 | 6125135.73 |
| 21156 | 293614.25 | 6125203.78 |
| 21157 | 293588.46 | 6125155.20 |
| 21158 | 293587.52 | 6125153.44 |
| 21159 | 293951.85 | 6125295.29 |

|       |           |            |
|-------|-----------|------------|
| 21160 | 294057.16 | 6125691.52 |
| 21161 | 294049.07 | 6125675.44 |
| 21162 | 294072.71 | 6125635.32 |
| 21163 | 294079.58 | 6125648.65 |
| 21164 | 296225.22 | 6125458.23 |
| 21165 | 296303.88 | 6125639.18 |
| 21166 | 296300.32 | 6125763.76 |
| 21167 | 294019.95 | 6124898.27 |
| 21168 | 294016.88 | 6124890.04 |
| 21169 | 293911.21 | 6125221.21 |
| 21170 | 294265.29 | 6125444.21 |
| 21171 | 294264.60 | 6125442.34 |
| 21172 | 294513.69 | 6125465.35 |
| 21173 | 294511.81 | 6125466.02 |
| 21174 | 297337.35 | 6127325.66 |
| 21175 | 297339.35 | 6127325.82 |
| 21176 | 297417.75 | 6126775.03 |
| 21177 | 295369.45 | 6128190.31 |
| 21178 | 294289.40 | 6126363.28 |
| 21179 | 294291.35 | 6126362.82 |
| 21180 | 294313.14 | 6127737.47 |
| 21181 | 294315.14 | 6127737.55 |
| 21182 | 294418.13 | 6126925.71 |
| 21183 | 294126.10 | 6124607.02 |
| 21184 | 294149.61 | 6124670.82 |
| 21185 | 294147.49 | 6125858.57 |
| 21186 | 294187.27 | 6125835.46 |
| 21187 | 293951.17 | 6124922.72 |
| 21188 | 294018.06 | 6124898.94 |
| 21189 | 294273.59 | 6126653.58 |
| 21190 | 294263.14 | 6126562.16 |
| 21191 | 294238.09 | 6127206.71 |
| 21192 | 294264.03 | 6127204.33 |
| 21193 | 294198.06 | 6127207.92 |
| 21194 | 294197.18 | 6127196.96 |
| 21195 | 294198.22 | 6127209.92 |
| 21196 | 294264.24 | 6127206.32 |
| 21197 | 294269.32 | 6127256.06 |
| 21198 | 294263.88 | 6127202.34 |
| 21199 | 294259.56 | 6127147.51 |
| 21200 | 297215.32 | 6126623.06 |
| 21201 | 297269.36 | 6126626.06 |
| 21202 | 297270.52 | 6126764.16 |
| 21203 | 297201.78 | 6126759.20 |
| 21204 | 293717.59 | 6125327.68 |
| 21205 | 293729.11 | 6125321.13 |
| 21206 | 293724.43 | 6125312.64 |
| 21207 | 293728.14 | 6125319.38 |
| 21208 | 297116.38 | 6127333.68 |
| 21209 | 297107.59 | 6127273.08 |

|       |           |            |
|-------|-----------|------------|
| 21210 | 297141.19 | 6127327.38 |
| 21211 | 293700.93 | 6127095.99 |
| 21212 | 293494.38 | 6127146.66 |
| 21213 | 293510.59 | 6127129.10 |
| 21214 | 293509.74 | 6127103.11 |
| 21215 | 294010.87 | 6126654.34 |
| 21216 | 294094.91 | 6126641.64 |
| 21217 | 294023.72 | 6126822.76 |
| 21218 | 294012.97 | 6126735.42 |
| 21219 | 296352.16 | 6126198.67 |
| 21220 | 296351.75 | 6126193.69 |
| 21221 | 296350.79 | 6126255.64 |
| 21222 | 296352.27 | 6126202.66 |
| 21223 | 296327.67 | 6126042.36 |
| 21224 | 296330.83 | 6126062.41 |
| 21225 | 293847.31 | 6126853.21 |
| 21226 | 293830.76 | 6126727.14 |
| 21227 | 293827.36 | 6127046.18 |
| 21228 | 294300.12 | 6126067.60 |
| 21229 | 294337.70 | 6126183.44 |
| 21230 | 296115.08 | 6126320.62 |
| 21231 | 296117.98 | 6126299.66 |
| 21232 | 295870.60 | 6127365.75 |
| 21233 | 295875.22 | 6127409.01 |
| 21234 | 294140.54 | 6127441.99 |
| 21235 | 293776.05 | 6126865.82 |
| 21236 | 293785.94 | 6126941.18 |
| 21237 | 295915.27 | 6127162.94 |
| 21238 | 295916.19 | 6127178.50 |
| 21239 | 293686.94 | 6125442.24 |
| 21240 | 293722.84 | 6125422.46 |
| 21241 | 293517.16 | 6127289.15 |
| 21242 | 293497.16 | 6127289.29 |
| 21243 | 293516.42 | 6127251.16 |
| 21244 | 293514.62 | 6127215.49 |
| 21245 | 294034.13 | 6125558.47 |
| 21246 | 294071.79 | 6125633.54 |
| 21247 | 294301.97 | 6124965.48 |
| 21248 | 294294.37 | 6124944.60 |
| 21249 | 294368.06 | 6125375.93 |
| 21250 | 294342.50 | 6126861.23 |
| 21251 | 294311.76 | 6126865.67 |
| 21252 | 295014.36 | 6128309.82 |
| 21253 | 295045.59 | 6128307.23 |
| 21254 | 295447.29 | 6127388.93 |
| 21255 | 295454.35 | 6127388.35 |
| 21256 | 295464.85 | 6127310.18 |
| 21257 | 295462.57 | 6127328.39 |
| 21258 | 295470.59 | 6127265.41 |
| 21259 | 295674.18 | 6125316.10 |

|       |           |            |
|-------|-----------|------------|
| 21260 | 295672.74 | 6125247.87 |
| 21261 | 295674.22 | 6125318.10 |
| 21262 | 295670.01 | 6125143.74 |
| 21263 | 295670.01 | 6125140.87 |
| 21264 | 297391.40 | 6126851.34 |
| 21265 | 297255.11 | 6126840.37 |
| 21266 | 297371.70 | 6126377.47 |
| 21267 | 297324.86 | 6126367.03 |
| 21268 | 297342.97 | 6126769.39 |
| 21269 | 297395.71 | 6127047.05 |
| 21270 | 297392.16 | 6127330.25 |
| 21271 | 297385.35 | 6127288.31 |
| 21272 | 294815.13 | 6125811.74 |
| 21273 | 294817.28 | 6125787.92 |
| 21274 | 294857.06 | 6125858.67 |
| 21275 | 294861.88 | 6125793.18 |
| 21276 | 294823.31 | 6125854.76 |
| 21277 | 294723.85 | 6126129.92 |
| 21278 | 294725.92 | 6126110.74 |
| 21279 | 295005.35 | 6125981.36 |
| 21280 | 295005.31 | 6126120.33 |
| 21281 | 294282.37 | 6126558.91 |
| 21282 | 294319.18 | 6126552.68 |
| 21283 | 294297.67 | 6126649.23 |
| 21284 | 296571.34 | 6127412.14 |
| 21285 | 296581.95 | 6127414.90 |
| 21286 | 294157.13 | 6127699.00 |
| 21287 | 294153.25 | 6127657.01 |
| 21288 | 294140.96 | 6127701.62 |
| 21289 | 294155.15 | 6127699.32 |
| 21290 | 294161.65 | 6127760.30 |
| 21291 | 294159.31 | 6127715.94 |
| 21292 | 294140.68 | 6127761.90 |
| 21293 | 295766.03 | 6125499.41 |
| 21294 | 295831.24 | 6125505.95 |
| 21295 | 295758.94 | 6125552.49 |
| 21296 | 293882.16 | 6125685.61 |
| 21297 | 293896.78 | 6125714.30 |
| 21298 | 296333.06 | 6128164.83 |
| 21299 | 296341.53 | 6128216.13 |
| 21300 | 296320.03 | 6128164.52 |
| 21301 | 295468.23 | 6126732.39 |
| 21302 | 295477.72 | 6126733.02 |
| 21303 | 294196.72 | 6125934.24 |
| 21304 | 294230.57 | 6125915.63 |
| 21305 | 297046.65 | 6126167.14 |
| 21306 | 297066.75 | 6126176.09 |
| 21307 | 297034.89 | 6126242.27 |
| 21308 | 294246.16 | 6124816.61 |
| 21309 | 294187.81 | 6124658.84 |

|       |           |            |
|-------|-----------|------------|
| 21310 | 294305.71 | 6125616.60 |
| 21311 | 294325.14 | 6125885.95 |
| 21312 | 296566.30 | 6125994.83 |
| 21313 | 296688.92 | 6125998.42 |
| 21314 | 298339.35 | 6127790.31 |
| 21315 | 298377.74 | 6127776.13 |
| 21316 | 297337.04 | 6127330.65 |
| 21317 | 294448.70 | 6124647.37 |
| 21318 | 294514.45 | 6124623.31 |
| 21319 | 294566.86 | 6124848.17 |
| 21320 | 294602.66 | 6124835.69 |
| 21321 | 294579.42 | 6124649.54 |
| 21322 | 294594.14 | 6124691.36 |
| 21323 | 294387.23 | 6127638.28 |
| 21324 | 294373.92 | 6127638.98 |
| 21325 | 295226.08 | 6125404.71 |
| 21326 | 295220.95 | 6125442.67 |
| 21327 | 294935.32 | 6125712.28 |
| 21328 | 294970.97 | 6125715.14 |
| 21329 | 294948.27 | 6125688.82 |
| 21330 | 294884.87 | 6125682.67 |
| 21331 | 294878.18 | 6125747.39 |
| 21332 | 293306.52 | 6127207.09 |
| 21333 | 293285.61 | 6127217.20 |
| 21334 | 293305.88 | 6127250.52 |
| 21335 | 293326.21 | 6127283.20 |
| 21336 | 293344.81 | 6127315.18 |
| 21337 | 294875.21 | 6127064.04 |
| 21338 | 294876.42 | 6127032.19 |
| 21339 | 294250.22 | 6125286.56 |
| 21340 | 294302.35 | 6125429.11 |
| 21341 | 294050.12 | 6124979.86 |
| 21342 | 294033.73 | 6124935.82 |
| 21343 | 293496.00 | 6127179.24 |
| 21344 | 293497.71 | 6127215.20 |
| 21345 | 293514.51 | 6127213.50 |
| 21346 | 293512.70 | 6127177.54 |
| 21347 | 296701.69 | 6126067.04 |
| 21348 | 296560.19 | 6126067.78 |
| 21349 | 296568.77 | 6126210.60 |
| 21350 | 293264.75 | 6127183.85 |
| 21351 | 293766.83 | 6127057.08 |
| 21352 | 293710.72 | 6127060.22 |
| 21353 | 294182.49 | 6127530.59 |
| 21354 | 294182.33 | 6127586.30 |
| 21355 | 294152.99 | 6127529.50 |
| 21356 | 294153.34 | 6127586.49 |
| 21357 | 294152.95 | 6127475.10 |
| 21358 | 294155.05 | 6127654.74 |
| 21359 | 294179.12 | 6127651.31 |



|       |           |            |
|-------|-----------|------------|
| 21360 | 294895.19 | 6125582.78 |
| 21361 | 294890.24 | 6125629.07 |
| 21362 | 294911.45 | 6125751.32 |
| 21363 | 294829.47 | 6125676.92 |
| 21364 | 294448.96 | 6128130.86 |
| 21365 | 294213.18 | 6127484.56 |
| 21366 | 294248.60 | 6127482.74 |
| 21367 | 293968.12 | 6127416.05 |
| 21368 | 293942.95 | 6127414.89 |
| 21369 | 293539.35 | 6127380.68 |
| 21370 | 293577.34 | 6127370.75 |
| 21371 | 293881.02 | 6127086.26 |
| 21372 | 293705.49 | 6127093.82 |
| 21373 | 293786.47 | 6126942.32 |
| 21374 | 293750.18 | 6126946.49 |
| 21375 | 293755.85 | 6126866.26 |
| 21376 | 293701.42 | 6126874.46 |
| 21377 | 293709.69 | 6126943.96 |
| 21378 | 293740.75 | 6126868.06 |
| 21379 | 293701.19 | 6126872.47 |
| 21380 | 296119.38 | 6126288.51 |
| 21381 | 296118.89 | 6126292.72 |
| 21382 | 294422.93 | 6125050.27 |
| 21383 | 294394.70 | 6125060.41 |
| 21384 | 294445.27 | 6125381.68 |
| 21385 | 294416.53 | 6125392.03 |
| 21386 | 294374.08 | 6127303.70 |
| 21387 | 294460.67 | 6127295.30 |
| 21388 | 297388.78 | 6127238.94 |
| 21389 | 297398.78 | 6127189.05 |
| 21390 | 294389.87 | 6125437.36 |
| 21391 | 294267.14 | 6125517.81 |
| 21392 | 294438.71 | 6124619.08 |
| 21393 | 294313.81 | 6124776.61 |
| 21394 | 294424.89 | 6124736.82 |
| 21395 | 294403.92 | 6124670.69 |
| 21396 | 294451.07 | 6124654.00 |
| 21397 | 294426.75 | 6124736.10 |
| 21398 | 294411.84 | 6124694.71 |
| 21399 | 296395.03 | 6128212.23 |
| 21400 | 296398.21 | 6128211.68 |
| 21401 | 294058.90 | 6125690.55 |
| 21402 | 294099.09 | 6125668.16 |
| 21403 | 295456.81 | 6127371.45 |
| 21404 | 295410.46 | 6127275.48 |
| 21405 | 295308.07 | 6126187.20 |
| 21406 | 295307.65 | 6126191.30 |
| 21407 | 294394.14 | 6125123.06 |
| 21408 | 294324.49 | 6124932.42 |
| 21409 | 294364.72 | 6125133.93 |

|       |           |            |
|-------|-----------|------------|
| 21410 | 294403.56 | 6125121.83 |
| 21411 | 295374.28 | 6124925.42 |
| 21412 | 295373.89 | 6124914.77 |
| 21413 | 294428.08 | 6124897.22 |
| 21414 | 295662.94 | 6124941.22 |
| 21415 | 295535.82 | 6124944.83 |
| 21416 | 294862.53 | 6124845.99 |
| 21417 | 294900.41 | 6124832.62 |
| 21418 | 293752.74 | 6125172.93 |
| 21419 | 293707.98 | 6125089.73 |
| 21420 | 293781.06 | 6125157.29 |
| 21421 | 293735.50 | 6125075.07 |
| 21422 | 293845.28 | 6125122.57 |
| 21423 | 293800.51 | 6125040.13 |
| 21424 | 293765.87 | 6125054.16 |
| 21425 | 293723.09 | 6124978.01 |
| 21426 | 293869.80 | 6125245.50 |
| 21427 | 294121.38 | 6125169.31 |
| 21428 | 294139.41 | 6125216.61 |
| 21429 | 294203.79 | 6127263.63 |
| 21430 | 297195.23 | 6126836.52 |
| 21431 | 295658.86 | 6125186.26 |
| 21432 | 295670.72 | 6125185.86 |
| 21433 | 295718.77 | 6125324.19 |
| 21434 | 297391.96 | 6127079.97 |
| 21435 | 294764.52 | 6125820.25 |
| 21436 | 294765.84 | 6125806.57 |
| 21437 | 294723.93 | 6126110.54 |
| 21438 | 294688.63 | 6126106.87 |
| 21439 | 293883.08 | 6125682.85 |
| 21440 | 293963.28 | 6125639.82 |
| 21441 | 294157.32 | 6127716.15 |
| 21442 | 294136.12 | 6127718.30 |
| 21443 | 293898.55 | 6125713.38 |
| 21444 | 293953.12 | 6125685.03 |
| 21445 | 293689.46 | 6125097.44 |
| 21446 | 293707.05 | 6125087.96 |
| 21447 | 295784.35 | 6125075.25 |
| 21448 | 294311.93 | 6124777.27 |
| 21449 | 294326.36 | 6124816.71 |
| 21450 | 294325.10 | 6124657.70 |
| 21451 | 294309.23 | 6124612.40 |
| 21452 | 294296.83 | 6124735.94 |
| 21453 | 294392.01 | 6124795.43 |
| 21454 | 294340.85 | 6125417.93 |
| 21455 | 294378.03 | 6125403.16 |
| 21456 | 293989.39 | 6125179.73 |
| 21457 | 293712.40 | 6127049.51 |
| 21458 | 293490.09 | 6127103.64 |
| 21459 | 293384.46 | 6127109.52 |

|       |           |            |
|-------|-----------|------------|
| 21460 | 293797.23 | 6124959.44 |
| 21461 | 293781.14 | 6124930.64 |
| 21462 | 297014.17 | 6126236.01 |
| 21463 | 297034.56 | 6126244.24 |
| 21464 | 294341.70 | 6125969.27 |
| 21465 | 297343.49 | 6127240.88 |
| 21466 | 296940.79 | 6128226.22 |
| 21467 | 296979.37 | 6128220.53 |
| 21468 | 294889.83 | 6125633.05 |
| 21469 | 293304.41 | 6127203.69 |
| 21470 | 293291.71 | 6127183.33 |
| 21471 | 294579.10 | 6127186.68 |
| 21472 | 294524.94 | 6127191.29 |
| 21473 | 293682.38 | 6125347.69 |
| 21474 | 293679.27 | 6127237.94 |
| 21475 | 293677.32 | 6127246.05 |
| 21476 | 293395.09 | 6127148.85 |
| 21477 | 294246.24 | 6127589.14 |
| 21478 | 294244.94 | 6127619.10 |
| 21479 | 294680.56 | 6127873.83 |
| 21480 | 294654.07 | 6127918.38 |
| 21481 | 294248.42 | 6127472.89 |
| 21482 | 293709.79 | 6126944.63 |
| 21483 | 293740.99 | 6126870.05 |
| 21484 | 293750.12 | 6126945.51 |
| 21485 | 294087.69 | 6125237.60 |
| 21486 | 294036.11 | 6125154.71 |
| 21487 | 294140.14 | 6125218.47 |
| 21488 | 294100.69 | 6125232.86 |
| 21489 | 295553.58 | 6125969.53 |
| 21490 | 295475.32 | 6125815.39 |
| 21491 | 295479.84 | 6125150.07 |
| 21492 | 295527.81 | 6125148.72 |
| 21493 | 295507.04 | 6125527.48 |
| 21494 | 295521.31 | 6125413.26 |
| 21495 | 293426.09 | 6127182.48 |
| 21496 | 293407.75 | 6127150.35 |
| 21497 | 294193.70 | 6126141.81 |
| 21498 | 293787.70 | 6125240.38 |
| 21499 | 293848.57 | 6125208.11 |
| 21500 | 293819.13 | 6125369.60 |
| 21501 | 293799.87 | 6125334.73 |
| 21502 | 293782.03 | 6125159.04 |
| 21503 | 294394.31 | 6124644.61 |
| 21504 | 293426.31 | 6125121.67 |
| 21505 | 297304.40 | 6127858.29 |
| 21506 | 297336.28 | 6127855.49 |
| 21507 | 297312.04 | 6127927.04 |
| 21508 | 297313.03 | 6127935.96 |
| 21509 | 297347.88 | 6127896.02 |

|       |           |            |
|-------|-----------|------------|
| 21510 | 297357.14 | 6127894.98 |
| 21511 | 297309.08 | 6127900.38 |
| 21512 | 293969.66 | 6125239.35 |
| 21513 | 293988.46 | 6125274.65 |
| 21514 | 294222.61 | 6126662.42 |
| 21515 | 294206.93 | 6126571.61 |
| 21516 | 293757.52 | 6125400.44 |
| 21517 | 293718.55 | 6125329.43 |
| 21518 | 293655.04 | 6125460.19 |
| 21519 | 293669.86 | 6125451.86 |
| 21520 | 293649.21 | 6125413.00 |
| 21521 | 293668.92 | 6125450.09 |
| 21522 | 293738.48 | 6125413.54 |
| 21523 | 293758.48 | 6125402.19 |
| 21524 | 293957.70 | 6125055.35 |
| 21525 | 293874.69 | 6125099.48 |
| 21526 | 294078.32 | 6126456.09 |
| 21527 | 294136.52 | 6126441.50 |
| 21528 | 294070.15 | 6125826.29 |
| 21529 | 294025.65 | 6125851.21 |
| 21530 | 294303.04 | 6125430.99 |
| 21531 | 295505.18 | 6126472.87 |
| 21532 | 295629.16 | 6126488.80 |
| 21533 | 295419.78 | 6126324.86 |
| 21534 | 295374.23 | 6126633.86 |
| 21535 | 295395.60 | 6126463.23 |
| 21536 | 293925.78 | 6127019.94 |
| 21537 | 293916.25 | 6127164.09 |
| 21538 | 295398.85 | 6125195.39 |
| 21539 | 295525.02 | 6125076.81 |
| 21540 | 295457.86 | 6125403.17 |
| 21541 | 295452.92 | 6125455.94 |
| 21542 | 294384.80 | 6127582.92 |
| 21543 | 294624.07 | 6127573.97 |
| 21544 | 293820.46 | 6125272.29 |
| 21545 | 297350.92 | 6127922.80 |
| 21546 | 297359.89 | 6127921.84 |
| 21547 | 293989.40 | 6125276.41 |
| 21548 | 294369.71 | 6125692.31 |
| 21549 | 294345.35 | 6125697.93 |
| 21550 | 294322.80 | 6125651.10 |
| 21551 | 294305.52 | 6126429.42 |
| 21552 | 294299.30 | 6126403.06 |
| 21553 | 294322.06 | 6126500.84 |
| 21554 | 294308.21 | 6126441.09 |
| 21555 | 294342.94 | 6126350.67 |
| 21556 | 293735.01 | 6125415.52 |
| 21557 | 295693.10 | 6126094.63 |
| 21558 | 295707.71 | 6125991.65 |
| 21559 | 295508.06 | 6126453.07 |

|       |           |            |
|-------|-----------|------------|
| 21560 | 295960.62 | 6127118.25 |
| 21561 | 295966.00 | 6127065.39 |
| 21562 | 294218.16 | 6124648.71 |
| 21563 | 295493.65 | 6127636.56 |
| 21564 | 295837.87 | 6126982.07 |
| 21565 | 295901.65 | 6126976.82 |
| 21566 | 293872.30 | 6125690.50 |
| 21567 | 294307.88 | 6126928.81 |
| 21568 | 293936.48 | 6126971.45 |
| 21569 | 294139.09 | 6127595.14 |
| 21570 | 294090.24 | 6127597.30 |
| 21571 | 294262.47 | 6127752.61 |
| 21572 | 294262.96 | 6127830.61 |
| 21573 | 295525.60 | 6125096.80 |
| 21574 | 295540.30 | 6125076.41 |
| 21575 | 294413.53 | 6126895.06 |
| 21576 | 294382.41 | 6127049.40 |
| 21577 | 296199.73 | 6127197.41 |
| 21578 | 296185.68 | 6127132.87 |
| 21579 | 299058.19 | 6128408.38 |
| 21580 | 299047.48 | 6128371.98 |
| 21581 | 296640.81 | 6125888.96 |
| 21582 | 296640.81 | 6125890.96 |
| 21583 | 296640.82 | 6125886.96 |
| 21584 | 296170.66 | 6127064.81 |
| 21585 | 295227.69 | 6128476.06 |
| 21586 | 295223.40 | 6128429.92 |
| 21587 | 295181.55 | 6128480.64 |
| 21588 | 295227.87 | 6128478.05 |
| 21589 | 296523.27 | 6125491.72 |
| 21590 | 296547.93 | 6125515.98 |
| 21591 | 297254.37 | 6127863.66 |
| 21592 | 297259.80 | 6127914.32 |
| 21593 | 297474.94 | 6128141.64 |
| 21594 | 297471.71 | 6128142.57 |
| 21595 | 297420.44 | 6128067.83 |
| 21596 | 293154.21 | 6127033.81 |
| 21597 | 293150.46 | 6127121.62 |
| 21598 | 293169.70 | 6127032.46 |
| 21599 | 293154.30 | 6127031.81 |
| 21600 | 293548.13 | 6126591.03 |
| 21601 | 293568.36 | 6126759.46 |
| 21602 | 293567.10 | 6126748.49 |
| 21603 | 293185.60 | 6131230.71 |
| 21604 | 293160.54 | 6131270.33 |
| 21605 | 293265.36 | 6131278.76 |
| 21606 | 293188.36 | 6131230.09 |
| 21607 | 293263.45 | 6131335.43 |
| 21608 | 295222.64 | 6127008.98 |
| 21609 | 295219.74 | 6127035.04 |

|       |           |            |
|-------|-----------|------------|
| 21610 | 297261.42 | 6126282.08 |
| 21611 | 297285.52 | 6126291.03 |
| 21612 | 297295.83 | 6126294.86 |
| 21613 | 297830.87 | 6126896.16 |
| 21614 | 297833.76 | 6126908.32 |
| 21615 | 297835.71 | 6126907.86 |
| 21616 | 297863.64 | 6126901.38 |
| 21617 | 298994.15 | 6128190.67 |
| 21618 | 298990.73 | 6128179.37 |
| 21619 | 298250.13 | 6129038.78 |
| 21620 | 296927.67 | 6127714.88 |
| 21621 | 296933.28 | 6127764.56 |
| 21622 | 296886.11 | 6127720.92 |
| 21623 | 298394.38 | 6128927.05 |
| 21624 | 298410.54 | 6128923.99 |
| 21625 | 293619.28 | 6127549.41 |
| 21626 | 293621.62 | 6127551.86 |
| 21627 | 293617.60 | 6127547.58 |
| 21628 | 293580.38 | 6127486.04 |
| 21629 | 293547.66 | 6127428.61 |
| 21630 | 293550.12 | 6127427.75 |
| 21631 | 294433.22 | 6127855.45 |
| 21632 | 294431.22 | 6127855.45 |
| 21633 | 295334.76 | 6128194.51 |
| 21634 | 295334.95 | 6128196.50 |
| 21635 | 295072.34 | 6128023.32 |
| 21636 | 297366.71 | 6126956.35 |
| 21637 | 297366.50 | 6126958.34 |
| 21638 | 297310.90 | 6126985.57 |
| 21639 | 297310.78 | 6126987.57 |
| 21640 | 297311.06 | 6126983.58 |
| 21641 | 297076.44 | 6127482.99 |
| 21642 | 297078.42 | 6127482.70 |
| 21643 | 297076.70 | 6127484.97 |
| 21644 | 297074.47 | 6127483.33 |
| 21645 | 294679.30 | 6124861.05 |
| 21646 | 295031.21 | 6125288.52 |
| 21647 | 295031.33 | 6125286.53 |
| 21648 | 294901.44 | 6125992.67 |
| 21649 | 294901.64 | 6125990.68 |
| 21650 | 294737.11 | 6128233.52 |
| 21651 | 294739.10 | 6128233.73 |
| 21652 | 293577.47 | 6127056.22 |
| 21653 | 293579.46 | 6127056.08 |
| 21654 | 297688.66 | 6127233.01 |
| 21655 | 297686.69 | 6127233.33 |
| 21656 | 295833.44 | 6127169.04 |
| 21657 | 295835.44 | 6127168.89 |
| 21658 | 295683.47 | 6127248.19 |
| 21659 | 295887.27 | 6127230.36 |

|       |           |            |
|-------|-----------|------------|
| 21660 | 295693.28 | 6127372.03 |
| 21661 | 295720.15 | 6127376.31 |
| 21662 | 295555.44 | 6127237.87 |
| 21663 | 295736.30 | 6127228.25 |
| 21664 | 295573.55 | 6126891.30 |
| 21665 | 295568.19 | 6126931.02 |
| 21666 | 295618.06 | 6125680.01 |
| 21667 | 295615.97 | 6125693.85 |
| 21668 | 295603.49 | 6125609.58 |
| 21669 | 295602.55 | 6125615.51 |
| 21670 | 295610.47 | 6125616.63 |
| 21671 | 294368.85 | 6126542.76 |
| 21672 | 294386.47 | 6126539.09 |
| 21673 | 294364.66 | 6126292.25 |
| 21674 | 294342.14 | 6126193.07 |
| 21675 | 294400.63 | 6126180.67 |
| 21676 | 294413.64 | 6126177.92 |
| 21677 | 294369.43 | 6126061.90 |
| 21678 | 294354.41 | 6126249.73 |
| 21679 | 293947.32 | 6127083.97 |
| 21680 | 293950.99 | 6127118.96 |
| 21681 | 295952.71 | 6127205.63 |
| 21682 | 296066.64 | 6127203.74 |
| 21683 | 293414.47 | 6126986.61 |
| 21684 | 295430.87 | 6125151.84 |
| 21685 | 293494.00 | 6127179.34 |
| 21686 | 293428.09 | 6127182.39 |
| 21687 | 295461.68 | 6125330.09 |
| 21688 | 295464.39 | 6125307.25 |
| 21689 | 295458.27 | 6125388.88 |
| 21690 | 295458.05 | 6125401.18 |
| 21691 | 294353.11 | 6126903.41 |
| 21692 | 294342.99 | 6126863.17 |
| 21693 | 294328.49 | 6127021.53 |
| 21694 | 294325.98 | 6127008.28 |
| 21695 | 294319.23 | 6126972.61 |
| 21696 | 294294.57 | 6126826.33 |
| 21697 | 294213.04 | 6127529.49 |
| 21698 | 293916.02 | 6127195.77 |
| 21699 | 293783.69 | 6127327.97 |
| 21700 | 293909.68 | 6127320.83 |
| 21701 | 294181.23 | 6127391.76 |
| 21702 | 294213.24 | 6127391.78 |
| 21703 | 293967.58 | 6127263.50 |
| 21704 | 293968.71 | 6127275.48 |
| 21705 | 296074.87 | 6125590.09 |
| 21706 | 296122.15 | 6125595.23 |
| 21707 | 295657.98 | 6128140.17 |
| 21708 | 295805.83 | 6128120.10 |
| 21709 | 295610.66 | 6125143.34 |

|       |           |            |
|-------|-----------|------------|
| 21710 | 295608.24 | 6125076.39 |
| 21711 | 295543.71 | 6125146.43 |
| 21712 | 295540.39 | 6125078.41 |
| 21713 | 295722.14 | 6127376.17 |
| 21714 | 295760.70 | 6127372.85 |
| 21715 | 295681.53 | 6127119.06 |
| 21716 | 295744.09 | 6127113.40 |
| 21717 | 295662.95 | 6127250.00 |
| 21718 | 295730.18 | 6127455.90 |
| 21719 | 295563.08 | 6127428.40 |
| 21720 | 295569.86 | 6127378.86 |
| 21721 | 295603.55 | 6127471.88 |
| 21722 | 295617.17 | 6127375.72 |
| 21723 | 295666.96 | 6127372.13 |
| 21724 | 295516.52 | 6127316.00 |
| 21725 | 295509.06 | 6127383.81 |
| 21726 | 294223.77 | 6125458.77 |
| 21727 | 294220.17 | 6125451.62 |
| 21728 | 293684.41 | 6126745.84 |
| 21729 | 294911.89 | 6125584.70 |
| 21730 | 294923.44 | 6125482.81 |
| 21731 | 294876.48 | 6125492.00 |
| 21732 | 294878.18 | 6125477.60 |
| 21733 | 295776.92 | 6126497.29 |
| 21734 | 295888.99 | 6126513.09 |
| 21735 | 294959.35 | 6127513.16 |
| 21736 | 294979.24 | 6127511.09 |
| 21737 | 294592.33 | 6126105.88 |
| 21738 | 294600.20 | 6126126.42 |
| 21739 | 295794.65 | 6127740.95 |
| 21740 | 295836.38 | 6127737.67 |
| 21741 | 295760.29 | 6127860.71 |
| 21742 | 295752.93 | 6127770.53 |
| 21743 | 294147.43 | 6125306.70 |
| 21744 | 294205.24 | 6125287.24 |
| 21745 | 294193.97 | 6125249.90 |
| 21746 | 294178.39 | 6125206.62 |
| 21747 | 296392.23 | 6126552.16 |
| 21748 | 296369.58 | 6126581.64 |
| 21749 | 297355.95 | 6127079.11 |
| 21750 | 294220.35 | 6126020.50 |
| 21751 | 294277.73 | 6126004.69 |
| 21752 | 294240.53 | 6126127.59 |
| 21753 | 295917.26 | 6127162.84 |
| 21754 | 295954.22 | 6127160.98 |
| 21755 | 295870.76 | 6127166.22 |
| 21756 | 295797.47 | 6127171.56 |
| 21757 | 295831.45 | 6127169.19 |
| 21758 | 295795.47 | 6127171.70 |
| 21759 | 295796.18 | 6127186.61 |



|       |           |            |
|-------|-----------|------------|
| 21760 | 294914.94 | 6126912.35 |
| 21761 | 294970.39 | 6126913.53 |
| 21762 | 294921.85 | 6126841.18 |
| 21763 | 293675.32 | 6127246.10 |
| 21764 | 293635.41 | 6127247.21 |
| 21765 | 295614.28 | 6126609.89 |
| 21766 | 295490.75 | 6127574.58 |
| 21767 | 295644.29 | 6127561.25 |
| 21768 | 295507.07 | 6127383.98 |
| 21769 | 295514.53 | 6127315.78 |
| 21770 | 295466.83 | 6127310.40 |
| 21771 | 295497.64 | 6127636.20 |
| 21772 | 295690.87 | 6127619.03 |
| 21773 | 295444.13 | 6127438.16 |
| 21774 | 296090.47 | 6126011.73 |
| 21775 | 296133.98 | 6126173.84 |
| 21776 | 295509.26 | 6128127.13 |
| 21777 | 295503.15 | 6128083.99 |
| 21778 | 294482.37 | 6125371.44 |
| 21779 | 294484.13 | 6125343.82 |
| 21780 | 294447.76 | 6125242.33 |
| 21781 | 296105.99 | 6125855.93 |
| 21782 | 295987.07 | 6125840.92 |
| 21783 | 296894.53 | 6127790.06 |
| 21784 | 294531.77 | 6125349.60 |
| 21785 | 296556.80 | 6126480.60 |
| 21786 | 294887.06 | 6125381.53 |
| 21787 | 294883.53 | 6125423.95 |
| 21788 | 298365.10 | 6127555.28 |
| 21789 | 297685.84 | 6126788.97 |
| 21790 | 297751.76 | 6126776.99 |
| 21791 | 297710.78 | 6126711.06 |
| 21792 | 297755.79 | 6126702.58 |
| 21793 | 297632.85 | 6126923.53 |
| 21794 | 297573.12 | 6127018.84 |
| 21795 | 297591.94 | 6127015.44 |
| 21796 | 297563.34 | 6126965.86 |
| 21797 | 294257.26 | 6125521.37 |
| 21798 | 293682.95 | 6125166.67 |
| 21799 | 293656.50 | 6125118.08 |
| 21800 | 293477.65 | 6125096.40 |
| 21801 | 293526.03 | 6125184.98 |
| 21802 | 293509.21 | 6125078.99 |
| 21803 | 293557.65 | 6125167.60 |
| 21804 | 293511.53 | 6127144.82 |
| 21805 | 293581.58 | 6125211.51 |
| 21806 | 293559.57 | 6125171.11 |
| 21807 | 293558.61 | 6125169.35 |
| 21808 | 293498.53 | 6125200.19 |
| 21809 | 293527.07 | 6125186.69 |

|       |           |            |
|-------|-----------|------------|
| 21810 | 295843.59 | 6126771.10 |
| 21811 | 295982.31 | 6126787.68 |
| 21812 | 295967.91 | 6126521.32 |
| 21813 | 295842.50 | 6125859.86 |
| 21814 | 295446.48 | 6127478.36 |
| 21815 | 295493.56 | 6127474.96 |
| 21816 | 295436.53 | 6127480.98 |
| 21817 | 295426.81 | 6127534.12 |
| 21818 | 295539.24 | 6126220.43 |
| 21819 | 295574.15 | 6125972.40 |
| 21820 | 294141.11 | 6127483.61 |
| 21821 | 296941.60 | 6127396.04 |
| 21822 | 296943.92 | 6127412.02 |
| 21823 | 293921.32 | 6124891.33 |
| 21824 | 294004.11 | 6124861.46 |
| 21825 | 293537.41 | 6127381.18 |
| 21826 | 293541.62 | 6127401.01 |
| 21827 | 295356.60 | 6124914.70 |
| 21828 | 295371.89 | 6124914.76 |
| 21829 | 296798.79 | 6127474.94 |
| 21830 | 296776.29 | 6127535.67 |
| 21831 | 296815.63 | 6127529.73 |
| 21832 | 296792.22 | 6127408.18 |
| 21833 | 296821.98 | 6127404.37 |
| 21834 | 296859.00 | 6127457.66 |
| 21835 | 296851.68 | 6127400.13 |
| 21836 | 296825.94 | 6127403.83 |
| 21837 | 296801.40 | 6127472.52 |
| 21838 | 296831.90 | 6127461.57 |
| 21839 | 294085.21 | 6126592.59 |
| 21840 | 294093.37 | 6126810.06 |
| 21841 | 294086.76 | 6126728.31 |
| 21842 | 294059.21 | 6126816.70 |
| 21843 | 294049.11 | 6126729.28 |
| 21844 | 293958.04 | 6125294.10 |
| 21845 | 298518.67 | 6127721.56 |
| 21846 | 298532.11 | 6127782.07 |
| 21847 | 298554.42 | 6127706.63 |
| 21848 | 298518.24 | 6127719.60 |
| 21849 | 293478.87 | 6126849.97 |
| 21850 | 293524.25 | 6126858.98 |
| 21851 | 298591.64 | 6128076.10 |
| 21852 | 298635.69 | 6128066.51 |
| 21853 | 295207.94 | 6124717.57 |
| 21854 | 294788.27 | 6125619.77 |
| 21855 | 294792.13 | 6125571.50 |
| 21856 | 295048.90 | 6126157.38 |
| 21857 | 295078.19 | 6126162.28 |
| 21858 | 295014.66 | 6126279.03 |
| 21859 | 295148.19 | 6126296.09 |

|       |           |            |
|-------|-----------|------------|
| 21860 | 294726.71 | 6128335.36 |
| 21861 | 294720.52 | 6128390.34 |
| 21862 | 294828.48 | 6126092.40 |
| 21863 | 294846.87 | 6126094.47 |
| 21864 | 298664.30 | 6128060.21 |
| 21865 | 297435.44 | 6127114.96 |
| 21866 | 297446.42 | 6127003.90 |
| 21867 | 297437.41 | 6127114.61 |
| 21868 | 297536.70 | 6127097.11 |
| 21869 | 294767.50 | 6127998.87 |
| 21870 | 294782.28 | 6127741.01 |
| 21871 | 294832.12 | 6127737.10 |
| 21872 | 295510.76 | 6125530.06 |
| 21873 | 294421.32 | 6127855.45 |
| 21874 | 294389.82 | 6127855.44 |
| 21875 | 293655.54 | 6125116.32 |
| 21876 | 294329.71 | 6127039.49 |
| 21877 | 293949.31 | 6127083.72 |
| 21878 | 298263.86 | 6127834.50 |
| 21879 | 298280.95 | 6127859.75 |
| 21880 | 298251.64 | 6127722.49 |
| 21881 | 298271.18 | 6127714.64 |
| 21882 | 298079.81 | 6127544.38 |
| 21883 | 298347.85 | 6127440.32 |
| 21884 | 298280.52 | 6127812.05 |
| 21885 | 298250.67 | 6128075.69 |
| 21886 | 299030.43 | 6128964.22 |
| 21887 | 299039.16 | 6129010.40 |
| 21888 | 298257.39 | 6129077.23 |
| 21889 | 294561.76 | 6127757.12 |
| 21890 | 294561.17 | 6127843.39 |
| 21891 | 294777.11 | 6127639.64 |
| 21892 | 294779.60 | 6127690.25 |
| 21893 | 294634.85 | 6127181.97 |
| 21894 | 294677.65 | 6127177.91 |
| 21895 | 293592.43 | 6127415.41 |
| 21896 | 293613.37 | 6127682.72 |
| 21897 | 293545.05 | 6127537.62 |
| 21898 | 293589.49 | 6127580.28 |
| 21899 | 293566.56 | 6127610.38 |
| 21900 | 293610.78 | 6127515.46 |
| 21901 | 293708.77 | 6127605.13 |
| 21902 | 293746.53 | 6127567.33 |
| 21903 | 293677.76 | 6127574.40 |
| 21904 | 293716.02 | 6127535.25 |
| 21905 | 293645.42 | 6127544.17 |
| 21906 | 293681.73 | 6127505.44 |
| 21907 | 294145.60 | 6127101.63 |
| 21908 | 294132.89 | 6127103.07 |
| 21909 | 294162.40 | 6127327.91 |

|       |           |            |
|-------|-----------|------------|
| 21910 | 293916.81 | 6127321.23 |
| 21911 | 294126.78 | 6126401.67 |
| 21912 | 294145.90 | 6126482.44 |
| 21913 | 293508.22 | 6125077.25 |
| 21914 | 293526.34 | 6125067.35 |
| 21915 | 294423.77 | 6126224.50 |
| 21916 | 294366.61 | 6126291.79 |
| 21917 | 294299.32 | 6126065.76 |
| 21918 | 294460.51 | 6126020.36 |
| 21919 | 294505.99 | 6126309.54 |
| 21920 | 294435.52 | 6126532.68 |
| 21921 | 294411.69 | 6126437.13 |
| 21922 | 294333.36 | 6126549.78 |
| 21923 | 294275.92 | 6124677.58 |
| 21924 | 294279.33 | 6124686.98 |
| 21925 | 294253.82 | 6125413.28 |
| 21926 | 298440.50 | 6128961.07 |
| 21927 | 298447.89 | 6129000.19 |
| 21928 | 298641.04 | 6128891.44 |
| 21929 | 298455.38 | 6129039.81 |
| 21930 | 293824.90 | 6127847.53 |
| 21931 | 293852.51 | 6127820.94 |
| 21932 | 298422.48 | 6128069.59 |
| 21933 | 294773.35 | 6127954.93 |
| 21934 | 294758.43 | 6127917.36 |
| 21935 | 294741.75 | 6128031.76 |
| 21936 | 298222.36 | 6128063.29 |
| 21937 | 298218.24 | 6128005.61 |
| 21938 | 294514.81 | 6127855.31 |
| 21939 | 294513.46 | 6127760.33 |
| 21940 | 294635.00 | 6127183.96 |
| 21941 | 294638.09 | 6127223.84 |
| 21942 | 293590.39 | 6127580.77 |
| 21943 | 293739.98 | 6127635.58 |
| 21944 | 293775.65 | 6127599.57 |
| 21945 | 298327.84 | 6129089.22 |
| 21946 | 295740.81 | 6127612.48 |
| 21947 | 295742.81 | 6127612.31 |
| 21948 | 297441.44 | 6126525.64 |
| 21949 | 296402.52 | 6126079.70 |
| 21950 | 296406.28 | 6126124.17 |
| 21951 | 294942.40 | 6128616.67 |
| 21952 | 294942.27 | 6128578.77 |
| 21953 | 294895.38 | 6128586.71 |
| 21954 | 294895.22 | 6128617.49 |
| 21955 | 295184.44 | 6128525.99 |
| 21956 | 295182.13 | 6128504.61 |
| 21957 | 299085.13 | 6128163.91 |
| 21958 | 294315.54 | 6127679.52 |
| 21959 | 294315.90 | 6127660.72 |

|       |           |            |
|-------|-----------|------------|
| 21960 | 294306.30 | 6127466.49 |
| 21961 | 294357.96 | 6127305.44 |
| 21962 | 293947.88 | 6127598.84 |
| 21963 | 294215.35 | 6125191.22 |
| 21964 | 294216.04 | 6125193.10 |
| 21965 | 297043.58 | 6128320.92 |
| 21966 | 297039.45 | 6128288.18 |
| 21967 | 295390.18 | 6128312.67 |
| 21968 | 295393.17 | 6128312.47 |
| 21969 | 295395.17 | 6128312.34 |
| 21970 | 295386.68 | 6128272.92 |
| 21971 | 295407.91 | 6128384.17 |
| 21972 | 295354.10 | 6128387.33 |
| 21973 | 295416.39 | 6128426.69 |
| 21974 | 295357.96 | 6128428.51 |
| 21975 | 294141.08 | 6127530.86 |
| 21976 | 294141.09 | 6127595.05 |
| 21977 | 294140.61 | 6127615.04 |
| 21978 | 294139.08 | 6127530.80 |
| 21979 | 293688.01 | 6125443.94 |
| 21980 | 293693.27 | 6125452.27 |
| 21981 | 294199.46 | 6126240.97 |
| 21982 | 293191.57 | 6126988.41 |
| 21983 | 293194.26 | 6126940.31 |
| 21984 | 293489.78 | 6127073.57 |
| 21985 | 294370.45 | 6127433.05 |
| 21986 | 293512.85 | 6127342.15 |
| 21987 | 293673.91 | 6125106.14 |
| 21988 | 294405.85 | 6126411.95 |
| 21989 | 294529.23 | 6126381.90 |
| 21990 | 294278.30 | 6127619.76 |
| 21991 | 294283.93 | 6127390.79 |
| 21992 | 294283.30 | 6127408.79 |
| 21993 | 294282.91 | 6127442.03 |
| 21994 | 294282.11 | 6127468.67 |
| 21995 | 294255.42 | 6127675.68 |
| 21996 | 293652.17 | 6127051.83 |
| 21997 | 293680.66 | 6127050.68 |
| 21998 | 293357.88 | 6127309.62 |
| 21999 | 298549.05 | 6127191.37 |
| 22000 | 298548.15 | 6127190.37 |
| 22001 | 294170.17 | 6125900.96 |
| 22002 | 294215.77 | 6125635.97 |
| 22003 | 294216.65 | 6125637.76 |
| 22004 | 294214.89 | 6125634.17 |
| 22005 | 293968.05 | 6127478.22 |
| 22006 | 293970.05 | 6127478.22 |
| 22007 | 293965.59 | 6127263.72 |
| 22008 | 294135.28 | 6127134.86 |
| 22009 | 294137.27 | 6127134.62 |

|       |           |            |
|-------|-----------|------------|
| 22010 | 295749.15 | 6128409.80 |
| 22011 | 295752.63 | 6128522.85 |
| 22012 | 295752.53 | 6128520.85 |
| 22013 | 295792.56 | 6128520.48 |
| 22014 | 295792.45 | 6128518.48 |
| 22015 | 295792.66 | 6128522.48 |
| 22016 | 295560.25 | 6128251.78 |
| 22017 | 295545.91 | 6128150.54 |
| 22018 | 295319.41 | 6125052.51 |
| 22019 | 295318.25 | 6124998.71 |
| 22020 | 294760.10 | 6124782.83 |
| 22021 | 296768.04 | 6126339.07 |
| 22022 | 296776.28 | 6126292.20 |
| 22023 | 295399.06 | 6128270.70 |
| 22024 | 295435.75 | 6128271.18 |
| 22025 | 294887.54 | 6125993.04 |
| 22026 | 295048.79 | 6126541.00 |
| 22027 | 295143.02 | 6126552.59 |
| 22028 | 295159.43 | 6127710.03 |
| 22029 | 294840.96 | 6126245.31 |
| 22030 | 294837.35 | 6126281.13 |
| 22031 | 294924.13 | 6125383.36 |
| 22032 | 294887.24 | 6125379.54 |
| 22033 | 296050.85 | 6128513.56 |
| 22034 | 296051.27 | 6128516.54 |
| 22035 | 295998.54 | 6128515.86 |
| 22036 | 295973.67 | 6128488.48 |
| 22037 | 295896.85 | 6127523.51 |
| 22038 | 295913.61 | 6127730.61 |
| 22039 | 295736.98 | 6127562.63 |
| 22040 | 295692.89 | 6127195.09 |
| 22041 | 295750.20 | 6127191.90 |
| 22042 | 296510.29 | 6128193.21 |
| 22043 | 296482.71 | 6128035.63 |
| 22044 | 296611.71 | 6127908.44 |
| 22045 | 296602.04 | 6127820.96 |
| 22046 | 294140.47 | 6127759.91 |
| 22047 | 294044.32 | 6127721.91 |
| 22048 | 294048.64 | 6127767.38 |
| 22049 | 294130.18 | 6127762.76 |
| 22050 | 294048.83 | 6127769.37 |
| 22051 | 294143.90 | 6125975.83 |
| 22052 | 294212.73 | 6124955.14 |
| 22053 | 297351.11 | 6127143.64 |
| 22054 | 293943.70 | 6127052.19 |
| 22055 | 296530.68 | 6128360.96 |
| 22056 | 296533.17 | 6128282.93 |
| 22057 | 296538.14 | 6128282.17 |
| 22058 | 295783.44 | 6125325.08 |
| 22059 | 296406.66 | 6126515.03 |

|       |           |            |
|-------|-----------|------------|
| 22060 | 296393.35 | 6126550.38 |
| 22061 | 296029.02 | 6126539.37 |
| 22062 | 296086.38 | 6126547.10 |
| 22063 | 296703.90 | 6125999.13 |
| 22064 | 296773.86 | 6126001.40 |
| 22065 | 296702.85 | 6126248.12 |
| 22066 | 296703.15 | 6126243.06 |
| 22067 | 296580.31 | 6126737.23 |
| 22068 | 296609.09 | 6126747.74 |
| 22069 | 298640.63 | 6128889.28 |
| 22070 | 298657.04 | 6128886.18 |
| 22071 | 298799.43 | 6128850.50 |
| 22072 | 299060.89 | 6127616.62 |
| 22073 | 299062.42 | 6127617.92 |
| 22074 | 293029.57 | 6126917.28 |
| 22075 | 293028.47 | 6126878.30 |
| 22076 | 295273.67 | 6126710.51 |
| 22077 | 295253.82 | 6126708.05 |
| 22078 | 295083.49 | 6126862.49 |
| 22079 | 295086.76 | 6126835.56 |
| 22080 | 295064.57 | 6127019.31 |
| 22081 | 298236.72 | 6127808.29 |
| 22082 | 298172.69 | 6127709.61 |
| 22083 | 298055.08 | 6127278.55 |
| 22084 | 298053.82 | 6127270.65 |
| 22085 | 298047.26 | 6127389.94 |
| 22086 | 298076.29 | 6127378.51 |
| 22087 | 298711.40 | 6129014.69 |
| 22088 | 298742.84 | 6129008.75 |
| 22089 | 298719.48 | 6128874.38 |
| 22090 | 298734.04 | 6128951.39 |
| 22091 | 298679.35 | 6129022.79 |
| 22092 | 293263.05 | 6127184.92 |
| 22093 | 293180.64 | 6127236.59 |
| 22094 | 293182.11 | 6127182.18 |
| 22095 | 293239.09 | 6127148.85 |
| 22096 | 293183.84 | 6127181.17 |
| 22097 | 293240.82 | 6127147.84 |
| 22098 | 293189.24 | 6127068.85 |
| 22099 | 297885.80 | 6127651.05 |
| 22100 | 294035.12 | 6127239.43 |
| 22101 | 294130.90 | 6127103.30 |
| 22102 | 294237.17 | 6127122.88 |
| 22103 | 295976.72 | 6127727.43 |
| 22104 | 295988.37 | 6127726.23 |
| 22105 | 295750.52 | 6127743.42 |
| 22106 | 295747.63 | 6127702.94 |
| 22107 | 295401.63 | 6128553.63 |
| 22108 | 295403.00 | 6128596.92 |
| 22109 | 293381.14 | 6127076.18 |

|       |           |            |
|-------|-----------|------------|
| 22110 | 293376.18 | 6126990.02 |
| 22111 | 298823.94 | 6127809.05 |
| 22112 | 298813.25 | 6127771.64 |
| 22113 | 298746.59 | 6127827.28 |
| 22114 | 298782.29 | 6127819.80 |
| 22115 | 295092.13 | 6125195.56 |
| 22116 | 295141.70 | 6125202.01 |
| 22117 | 294838.27 | 6125165.61 |
| 22118 | 294886.03 | 6125171.27 |
| 22119 | 294863.59 | 6125379.11 |
| 22120 | 294857.28 | 6125432.52 |
| 22121 | 295892.08 | 6127122.92 |
| 22122 | 298041.70 | 6127506.03 |
| 22123 | 297985.49 | 6127414.39 |
| 22124 | 298044.22 | 6127486.84 |
| 22125 | 298070.48 | 6127553.96 |
| 22126 | 298132.65 | 6127654.71 |
| 22127 | 298102.27 | 6127604.97 |
| 22128 | 298128.08 | 6127656.83 |
| 22129 | 298130.84 | 6127655.56 |
| 22130 | 295220.20 | 6125357.97 |
| 22131 | 295232.17 | 6125359.59 |
| 22132 | 297225.65 | 6126468.32 |
| 22133 | 297226.62 | 6126468.74 |
| 22134 | 297272.22 | 6126726.36 |
| 22135 | 297279.65 | 6126626.64 |
| 22136 | 297318.45 | 6126891.68 |
| 22137 | 297308.32 | 6127028.79 |
| 22138 | 297247.82 | 6127005.70 |
| 22139 | 297255.36 | 6126888.35 |
| 22140 | 297247.69 | 6127007.69 |
| 22141 | 297257.29 | 6127004.90 |
| 22142 | 295575.40 | 6128532.48 |
| 22143 | 295604.67 | 6128531.06 |
| 22144 | 295687.32 | 6128656.50 |
| 22145 | 295696.19 | 6128655.90 |
| 22146 | 295690.51 | 6128526.55 |
| 22147 | 295717.57 | 6128524.82 |
| 22148 | 296618.83 | 6127751.35 |
| 22149 | 296623.75 | 6127799.08 |
| 22150 | 297356.08 | 6126601.91 |
| 22151 | 295811.60 | 6128308.62 |
| 22152 | 295796.65 | 6128292.49 |
| 22153 | 293171.15 | 6127373.53 |
| 22154 | 293170.02 | 6127415.58 |
| 22155 | 296960.91 | 6128322.82 |
| 22156 | 296957.71 | 6128301.05 |
| 22157 | 296891.61 | 6128331.76 |
| 22158 | 296913.58 | 6128330.74 |
| 22159 | 296351.59 | 6126191.70 |



|       |           |            |
|-------|-----------|------------|
| 22160 | 297881.46 | 6127307.26 |
| 22161 | 297881.11 | 6127305.29 |
| 22162 | 297474.66 | 6128139.67 |
| 22163 | 296026.22 | 6125454.99 |
| 22164 | 296024.22 | 6125455.03 |
| 22165 | 298219.90 | 6128004.50 |
| 22166 | 298282.01 | 6127963.58 |
| 22167 | 298280.33 | 6127964.66 |
| 22168 | 298249.02 | 6128076.81 |
| 22169 | 294165.93 | 6126100.87 |
| 22170 | 296041.34 | 6126412.17 |
| 22171 | 296118.66 | 6126294.71 |
| 22172 | 294775.02 | 6127288.07 |
| 22173 | 294775.37 | 6127280.24 |
| 22174 | 294770.80 | 6127288.35 |
| 22175 | 297024.29 | 6127370.26 |
| 22176 | 297110.87 | 6127350.98 |
| 22177 | 294885.79 | 6125173.25 |
| 22178 | 294807.49 | 6124921.56 |
| 22179 | 294481.88 | 6124923.18 |
| 22180 | 294483.77 | 6124922.53 |
| 22181 | 297931.90 | 6127331.13 |
| 22182 | 297931.56 | 6127329.15 |
| 22183 | 297934.15 | 6127330.70 |
| 22184 | 297935.20 | 6127332.41 |
| 22185 | 297926.56 | 6127299.80 |
| 22186 | 297924.59 | 6127300.16 |
| 22187 | 297926.27 | 6127298.16 |
| 22188 | 297924.31 | 6127298.56 |
| 22189 | 297703.35 | 6127345.86 |
| 22190 | 297702.85 | 6127343.07 |
| 22191 | 297922.08 | 6127306.24 |
| 22192 | 297921.53 | 6127303.49 |
| 22193 | 294777.36 | 6127629.99 |
| 22194 | 294774.76 | 6127629.99 |
| 22195 | 298439.46 | 6129165.58 |
| 22196 | 298441.44 | 6129165.35 |
| 22197 | 298929.69 | 6129108.94 |
| 22198 | 298927.70 | 6129109.17 |
| 22199 | 298929.32 | 6129106.97 |
| 22200 | 298972.51 | 6129104.00 |
| 22201 | 298972.14 | 6129102.03 |
| 22202 | 299004.46 | 6129057.66 |
| 22203 | 299006.43 | 6129057.29 |
| 22204 | 298986.51 | 6128962.70 |
| 22205 | 298984.55 | 6128963.07 |
| 22206 | 298744.81 | 6129008.38 |
| 22207 | 298746.77 | 6129008.01 |
| 22208 | 298711.77 | 6129016.66 |
| 22209 | 298591.21 | 6128074.15 |

|       |           |            |
|-------|-----------|------------|
| 22210 | 298571.46 | 6127983.96 |
| 22211 | 298571.89 | 6127985.91 |
| 22212 | 297475.68 | 6127379.58 |
| 22213 | 297479.62 | 6127378.86 |
| 22214 | 297448.65 | 6127221.63 |
| 22215 | 298295.05 | 6129093.38 |
| 22216 | 298295.42 | 6129095.35 |
| 22217 | 298261.64 | 6129099.69 |
| 22218 | 298262.01 | 6129101.66 |
| 22219 | 298128.01 | 6129124.95 |
| 22220 | 298128.38 | 6129126.91 |
| 22221 | 298160.44 | 6129118.82 |
| 22222 | 298160.81 | 6129120.79 |
| 22223 | 298187.21 | 6129113.76 |
| 22224 | 298186.84 | 6129111.80 |
| 22225 | 298185.25 | 6129114.13 |
| 22226 | 298219.64 | 6129107.63 |
| 22227 | 298220.01 | 6129109.60 |
| 22228 | 298058.25 | 6129138.13 |
| 22229 | 298058.62 | 6129140.10 |
| 22230 | 298194.37 | 6128973.94 |
| 22231 | 298207.75 | 6129044.75 |
| 22232 | 293642.72 | 6126738.47 |
| 22233 | 293579.46 | 6126746.84 |
| 22234 | 293519.11 | 6127289.57 |
| 22235 | 293671.32 | 6127322.54 |
| 22236 | 295126.92 | 6125336.22 |
| 22237 | 295125.94 | 6125346.17 |
| 22238 | 296254.77 | 6127703.21 |
| 22239 | 296270.33 | 6127791.05 |
| 22240 | 296321.69 | 6127852.24 |
| 22241 | 296335.63 | 6127943.88 |
| 22242 | 296335.98 | 6127946.05 |
| 22243 | 296303.60 | 6127947.65 |
| 22244 | 296332.16 | 6127944.20 |
| 22245 | 296455.50 | 6126076.62 |
| 22246 | 296694.06 | 6126343.92 |
| 22247 | 294640.98 | 6127694.16 |
| 22248 | 294545.00 | 6127700.12 |
| 22249 | 294664.10 | 6125286.00 |
| 22250 | 294760.79 | 6125254.17 |
| 22251 | 294594.19 | 6126105.15 |
| 22252 | 294617.08 | 6126096.12 |
| 22253 | 295386.65 | 6127695.83 |
| 22254 | 295306.45 | 6128276.53 |
| 22255 | 295299.36 | 6128198.74 |
| 22256 | 297366.41 | 6126400.41 |
| 22257 | 298096.29 | 6129107.68 |
| 22258 | 298028.46 | 6129120.50 |
| 22259 | 298090.36 | 6129108.80 |

|       |           |            |
|-------|-----------|------------|
| 22260 | 298100.61 | 6129130.13 |
| 22261 | 298277.63 | 6129184.30 |
| 22262 | 298262.53 | 6129104.43 |
| 22263 | 297708.10 | 6127339.93 |
| 22264 | 298452.21 | 6127829.45 |
| 22265 | 298610.49 | 6128102.11 |
| 22266 | 295365.62 | 6128554.89 |
| 22267 | 295368.38 | 6128594.48 |
| 22268 | 298182.97 | 6129091.30 |
| 22269 | 298184.93 | 6129090.92 |
| 22270 | 298181.00 | 6129091.67 |
| 22271 | 296755.38 | 6127730.87 |
| 22272 | 296755.84 | 6127734.84 |
| 22273 | 296743.28 | 6127632.10 |
| 22274 | 296843.01 | 6127725.76 |
| 22275 | 296798.63 | 6127728.37 |
| 22276 | 296798.89 | 6127730.36 |
| 22277 | 296353.41 | 6128054.08 |
| 22278 | 296355.39 | 6128053.80 |
| 22279 | 296356.87 | 6128076.88 |
| 22280 | 296354.88 | 6128077.14 |
| 22281 | 296369.68 | 6128051.62 |
| 22282 | 296367.70 | 6128051.94 |
| 22283 | 297705.74 | 6127338.33 |
| 22284 | 296978.97 | 6127407.78 |
| 22285 | 296983.24 | 6127440.81 |
| 22286 | 297091.33 | 6127595.98 |
| 22287 | 294817.90 | 6128597.85 |
| 22288 | 294758.44 | 6128606.71 |
| 22289 | 295039.48 | 6128608.35 |
| 22290 | 294991.85 | 6128613.27 |
| 22291 | 295018.07 | 6126701.73 |
| 22292 | 294928.63 | 6125428.17 |
| 22293 | 294933.34 | 6125386.32 |
| 22294 | 293675.96 | 6126573.99 |
| 22295 | 293705.44 | 6126570.06 |
| 22296 | 295349.41 | 6126864.37 |
| 22297 | 295328.88 | 6127014.93 |
| 22298 | 296733.34 | 6127538.96 |
| 22299 | 295547.34 | 6125265.64 |
| 22300 | 295657.30 | 6125262.58 |
| 22301 | 293157.52 | 6126955.88 |
| 22302 | 293074.83 | 6127028.44 |
| 22303 | 295267.10 | 6126580.59 |
| 22304 | 297719.59 | 6127139.19 |
| 22305 | 294761.45 | 6128328.75 |
| 22306 | 293064.33 | 6127128.88 |
| 22307 | 293031.36 | 6127127.68 |
| 22308 | 295594.40 | 6128257.88 |
| 22309 | 295540.26 | 6128265.51 |

|       |           |            |
|-------|-----------|------------|
| 22310 | 295502.04 | 6128270.93 |
| 22311 | 295567.56 | 6128261.65 |
| 22312 | 295469.28 | 6128275.57 |
| 22313 | 295441.98 | 6128279.49 |
| 22314 | 295645.10 | 6128250.84 |
| 22315 | 295665.83 | 6128247.73 |
| 22316 | 297091.44 | 6128726.36 |
| 22317 | 297429.42 | 6126650.75 |
| 22318 | 294093.53 | 6126812.06 |
| 22319 | 294309.80 | 6126866.08 |
| 22320 | 294305.74 | 6126866.92 |
| 22321 | 293543.59 | 6127400.63 |
| 22322 | 293581.73 | 6127393.26 |
| 22323 | 296866.79 | 6126153.61 |
| 22324 | 296884.35 | 6126115.91 |
| 22325 | 296892.51 | 6126098.58 |
| 22326 | 297213.33 | 6126622.95 |
| 22327 | 297282.23 | 6127727.11 |
| 22328 | 297310.75 | 6127720.42 |
| 22329 | 293675.27 | 6127576.87 |
| 22330 | 298365.76 | 6128934.49 |
| 22331 | 296829.20 | 6128864.46 |
| 22332 | 295737.37 | 6126624.27 |
| 22333 | 295244.78 | 6127844.63 |
| 22334 | 295246.24 | 6127843.27 |
| 22335 | 298102.46 | 6127892.31 |
| 22336 | 295407.68 | 6126326.66 |
| 22337 | 298351.67 | 6127833.50 |
| 22338 | 298353.22 | 6127834.76 |
| 22339 | 298349.31 | 6129025.12 |
| 22340 | 298348.94 | 6129023.15 |
| 22341 | 297860.22 | 6127020.23 |
| 22342 | 297858.25 | 6127020.56 |
| 22343 | 297719.95 | 6127141.16 |
| 22344 | 295800.85 | 6128673.05 |
| 22345 | 295926.40 | 6128666.32 |
| 22346 | 296697.32 | 6128310.53 |
| 22347 | 296459.58 | 6128344.29 |
| 22348 | 296453.32 | 6128300.95 |
| 22349 | 296580.92 | 6128327.00 |
| 22350 | 296573.97 | 6128279.13 |
| 22351 | 296540.42 | 6128332.78 |
| 22352 | 296533.46 | 6128284.91 |
| 22353 | 293642.46 | 6126736.48 |
| 22354 | 293664.28 | 6127695.35 |
| 22355 | 293039.78 | 6126950.86 |
| 22356 | 298033.57 | 6127789.35 |
| 22357 | 298121.47 | 6127927.34 |
| 22358 | 298135.71 | 6127870.59 |
| 22359 | 298187.58 | 6129115.73 |

|       |           |            |
|-------|-----------|------------|
| 22360 | 298174.68 | 6129194.21 |
| 22361 | 298141.82 | 6129198.01 |
| 22362 | 295956.22 | 6127160.88 |
| 22363 | 294895.38 | 6127434.90 |
| 22364 | 294971.29 | 6127428.49 |
| 22365 | 298492.50 | 6127716.82 |
| 22366 | 294477.17 | 6127293.55 |
| 22367 | 299001.25 | 6128001.98 |
| 22368 | 297415.88 | 6126922.68 |
| 22369 | 295299.50 | 6127906.20 |
| 22370 | 298879.02 | 6127944.76 |
| 22371 | 298906.95 | 6128061.95 |
| 22372 | 295020.39 | 6128383.74 |
| 22373 | 295028.38 | 6128383.34 |
| 22374 | 295021.21 | 6128395.71 |
| 22375 | 294952.04 | 6128295.69 |
| 22376 | 296745.44 | 6128884.22 |
| 22377 | 296757.97 | 6128880.86 |
| 22378 | 296786.99 | 6128873.26 |
| 22379 | 295324.63 | 6127044.62 |
| 22380 | 296084.78 | 6127819.11 |
| 22381 | 298302.86 | 6127990.06 |
| 22382 | 298072.69 | 6128987.72 |
| 22383 | 294703.49 | 6125506.31 |
| 22384 | 294742.17 | 6125511.29 |
| 22385 | 294719.40 | 6128400.27 |
| 22386 | 293109.87 | 6126921.50 |
| 22387 | 298997.04 | 6129018.36 |
| 22388 | 298947.21 | 6128970.13 |
| 22389 | 298659.11 | 6128090.43 |
| 22390 | 298582.64 | 6128160.23 |
| 22391 | 298573.06 | 6128162.52 |
| 22392 | 298559.75 | 6128107.09 |
| 22393 | 296692.07 | 6126343.68 |
| 22394 | 296621.39 | 6128321.11 |
| 22395 | 296662.02 | 6128315.41 |
| 22396 | 296655.19 | 6128267.55 |
| 22397 | 298215.82 | 6129045.26 |
| 22398 | 297220.44 | 6128398.63 |
| 22399 | 296499.96 | 6128338.81 |
| 22400 | 296843.72 | 6128943.33 |
| 22401 | 294876.24 | 6125493.98 |
| 22402 | 294775.27 | 6125728.28 |
| 22403 | 294780.76 | 6125682.61 |
| 22404 | 297819.71 | 6127227.62 |
| 22405 | 298177.54 | 6127627.73 |
| 22406 | 297244.28 | 6126221.01 |
| 22407 | 296288.97 | 6128168.60 |
| 22408 | 297804.04 | 6126775.68 |
| 22409 | 297831.53 | 6126770.40 |

|       |           |            |
|-------|-----------|------------|
| 22410 | 294555.16 | 6127391.04 |
| 22411 | 294496.15 | 6127399.59 |
| 22412 | 294544.11 | 6127397.67 |
| 22413 | 294496.15 | 6127411.59 |
| 22414 | 295411.13 | 6128336.40 |
| 22415 | 297128.96 | 6128310.73 |
| 22416 | 297169.07 | 6128228.58 |
| 22417 | 297207.85 | 6128218.84 |
| 22418 | 297149.36 | 6128306.24 |
| 22419 | 297131.49 | 6128213.82 |
| 22420 | 297187.55 | 6128302.41 |
| 22421 | 296992.57 | 6127485.14 |
| 22422 | 297023.27 | 6127480.22 |
| 22423 | 296986.82 | 6127452.68 |
| 22424 | 296990.37 | 6127483.47 |
| 22425 | 297050.64 | 6127592.18 |
| 22426 | 298632.33 | 6128050.36 |
| 22427 | 294662.51 | 6127572.67 |
| 22428 | 298615.51 | 6128971.76 |
| 22429 | 298601.72 | 6128898.79 |
| 22430 | 293818.31 | 6127793.40 |
| 22431 | 293743.31 | 6127740.92 |
| 22432 | 293761.12 | 6127721.46 |
| 22433 | 297261.94 | 6127934.36 |
| 22434 | 293319.18 | 6126900.90 |
| 22435 | 293319.24 | 6126910.65 |
| 22436 | 293359.18 | 6126900.66 |
| 22437 | 297239.90 | 6128210.99 |
| 22438 | 297240.36 | 6128212.94 |
| 22439 | 296765.37 | 6128961.72 |
| 22440 | 296745.94 | 6128886.16 |
| 22441 | 296744.94 | 6128882.29 |
| 22442 | 296114.85 | 6125760.43 |
| 22443 | 295038.36 | 6127245.49 |
| 22444 | 295040.35 | 6127245.28 |
| 22445 | 295036.36 | 6127245.66 |
| 22446 | 295047.45 | 6127264.87 |
| 22447 | 298982.64 | 6128942.20 |
| 22448 | 298981.90 | 6128938.27 |
| 22449 | 298980.30 | 6128940.60 |
| 22450 | 293526.21 | 6126859.37 |
| 22451 | 293525.65 | 6126861.29 |
| 22452 | 293226.59 | 6126845.18 |
| 22453 | 293227.91 | 6126846.14 |
| 22454 | 293318.79 | 6126835.76 |
| 22455 | 293318.80 | 6126837.17 |
| 22456 | 296812.33 | 6126278.14 |
| 22457 | 296693.86 | 6127488.52 |
| 22458 | 296768.15 | 6127481.60 |
| 22459 | 297010.29 | 6127599.40 |

|       |           |            |
|-------|-----------|------------|
| 22460 | 297136.42 | 6127287.66 |
| 22461 | 297103.01 | 6127693.46 |
| 22462 | 293899.25 | 6127716.05 |
| 22463 | 293925.31 | 6127750.83 |
| 22464 | 293181.35 | 6126813.75 |
| 22465 | 293200.45 | 6126827.02 |
| 22466 | 293399.18 | 6126900.42 |
| 22467 | 294999.62 | 6128291.83 |
| 22468 | 296807.20 | 6128952.11 |
| 22469 | 296787.48 | 6128875.19 |
| 22470 | 297788.70 | 6127323.94 |
| 22471 | 297835.48 | 6127315.70 |
| 22472 | 295182.20 | 6126065.31 |
| 22473 | 294553.16 | 6127391.05 |
| 22474 | 294530.95 | 6127391.09 |
| 22475 | 297143.49 | 6128217.59 |
| 22476 | 297185.60 | 6128302.86 |
| 22477 | 299056.27 | 6128408.94 |
| 22478 | 295342.62 | 6128276.36 |
| 22479 | 295347.28 | 6128315.55 |
| 22480 | 295347.48 | 6128317.54 |
| 22481 | 297447.83 | 6127424.08 |
| 22482 | 297455.29 | 6127422.92 |
| 22483 | 297941.07 | 6127302.71 |
| 22484 | 297858.43 | 6127594.14 |
| 22485 | 297412.35 | 6126852.82 |
| 22486 | 298169.48 | 6127790.42 |
| 22487 | 298196.60 | 6127832.85 |
| 22488 | 298412.81 | 6127151.95 |
| 22489 | 293169.78 | 6127030.47 |
| 22490 | 293021.24 | 6126800.64 |
| 22491 | 293058.39 | 6126818.54 |
| 22492 | 295637.60 | 6128319.27 |
| 22493 | 295610.44 | 6128325.07 |
| 22494 | 295572.02 | 6128327.48 |
| 22495 | 295505.85 | 6128327.18 |
| 22496 | 295472.93 | 6128329.43 |
| 22497 | 295445.48 | 6128331.05 |
| 22498 | 293027.22 | 6127026.32 |
| 22499 | 296873.05 | 6128041.68 |
| 22500 | 293224.94 | 6126844.04 |
| 22501 | 296723.97 | 6127486.28 |
| 22502 | 296723.71 | 6127484.30 |
| 22503 | 295305.63 | 6126191.05 |
| 22504 | 297451.42 | 6128239.76 |
| 22505 | 297450.95 | 6128237.82 |
| 22506 | 298942.60 | 6128945.70 |
| 22507 | 296743.73 | 6127636.08 |
| 22508 | 296371.66 | 6128051.33 |
| 22509 | 296288.64 | 6128166.63 |

|       |           |            |
|-------|-----------|------------|
| 22510 | 294431.42 | 6127022.13 |
| 22511 | 294431.17 | 6127020.15 |
| 22512 | 294433.21 | 6127021.24 |
| 22513 | 294508.60 | 6126834.89 |
| 22514 | 294508.89 | 6126836.87 |
| 22515 | 294959.00 | 6125590.41 |
| 22516 | 294957.01 | 6125590.17 |
| 22517 | 294685.95 | 6125812.08 |
| 22518 | 294683.97 | 6125811.82 |
| 22519 | 294687.94 | 6125812.29 |
| 22520 | 294773.28 | 6125728.06 |
| 22521 | 295897.90 | 6126389.99 |
| 22522 | 295753.99 | 6126503.45 |
| 22523 | 295754.36 | 6126501.48 |
| 22524 | 295753.75 | 6126505.44 |
| 22525 | 295887.72 | 6125570.25 |
| 22526 | 295885.73 | 6125569.98 |
| 22527 | 295927.27 | 6128682.62 |
| 22528 | 295928.22 | 6128700.21 |
| 22529 | 295928.73 | 6128709.74 |
| 22530 | 295810.26 | 6128706.54 |
| 22531 | 295810.36 | 6128708.54 |
| 22532 | 293885.01 | 6127916.38 |
| 22533 | 293886.66 | 6127917.88 |
| 22534 | 297760.26 | 6127377.92 |
| 22535 | 298482.53 | 6128184.25 |
| 22536 | 298484.48 | 6128183.79 |
| 22537 | 299166.02 | 6127562.17 |
| 22538 | 299167.12 | 6127560.50 |
| 22539 | 298679.61 | 6127841.38 |
| 22540 | 298681.57 | 6127840.96 |
| 22541 | 298304.52 | 6127988.94 |
| 22542 | 293770.57 | 6127773.64 |
| 22543 | 297465.44 | 6127419.31 |
| 22544 | 295521.56 | 6125411.27 |
| 22545 | 295519.59 | 6125410.96 |
| 22546 | 297656.99 | 6127056.31 |
| 22547 | 297658.96 | 6127055.96 |
| 22548 | 297453.56 | 6126928.86 |
| 22549 | 297453.30 | 6126930.84 |
| 22550 | 296673.62 | 6126496.02 |
| 22551 | 296673.22 | 6126497.98 |
| 22552 | 294906.65 | 6125798.47 |
| 22553 | 294904.67 | 6125798.23 |
| 22554 | 298071.11 | 6129206.19 |
| 22555 | 298311.49 | 6129180.38 |
| 22556 | 298311.12 | 6129178.42 |
| 22557 | 298343.98 | 6129174.62 |
| 22558 | 298376.84 | 6129170.81 |
| 22559 | 298410.08 | 6129168.98 |



|       |           |            |
|-------|-----------|------------|
| 22560 | 298437.47 | 6129165.81 |
| 22561 | 296395.67 | 6127936.55 |
| 22562 | 296395.43 | 6127934.57 |
| 22563 | 296019.59 | 6125282.28 |
| 22564 | 296021.66 | 6125284.19 |
| 22565 | 296017.66 | 6125284.37 |
| 22566 | 295881.89 | 6125369.72 |
| 22567 | 296020.98 | 6125364.12 |
| 22568 | 296006.90 | 6125075.10 |
| 22569 | 296004.90 | 6125075.17 |
| 22570 | 297128.67 | 6128308.76 |
| 22571 | 297123.74 | 6128276.13 |
| 22572 | 295930.26 | 6126146.68 |
| 22573 | 295929.99 | 6126148.66 |
| 22574 | 295930.62 | 6126144.71 |
| 22575 | 296043.32 | 6126412.46 |
| 22576 | 296043.08 | 6126414.45 |
| 22577 | 294707.01 | 6126287.90 |
| 22578 | 294706.24 | 6126293.23 |
| 22579 | 294793.92 | 6125995.83 |
| 22580 | 294793.70 | 6125997.82 |
| 22581 | 294835.74 | 6125996.36 |
| 22582 | 294809.60 | 6126090.29 |
| 22583 | 294809.44 | 6126092.28 |
| 22584 | 294828.63 | 6126090.41 |
| 22585 | 294808.36 | 6126410.94 |
| 22586 | 294810.30 | 6126410.46 |
| 22587 | 294923.61 | 6124498.28 |
| 22588 | 294923.61 | 6124496.28 |
| 22589 | 294628.53 | 6124679.30 |
| 22590 | 294629.19 | 6124681.19 |
| 22591 | 297290.67 | 6128277.82 |
| 22592 | 298532.97 | 6127991.81 |
| 22593 | 298635.56 | 6128217.88 |
| 22594 | 298635.10 | 6128215.93 |
| 22595 | 298557.29 | 6128234.41 |
| 22596 | 298556.83 | 6128232.46 |
| 22597 | 298677.66 | 6127841.80 |
| 22598 | 298590.34 | 6127693.37 |
| 22599 | 298590.80 | 6127695.31 |
| 22600 | 298554.86 | 6127708.58 |
| 22601 | 298386.60 | 6128022.85 |
| 22602 | 298388.56 | 6128022.44 |
| 22603 | 295670.53 | 6128317.14 |
| 22604 | 296860.13 | 6126168.06 |
| 22605 | 297149.81 | 6128308.19 |
| 22606 | 296971.03 | 6128751.44 |
| 22607 | 297130.60 | 6128718.20 |
| 22608 | 295299.18 | 6128196.75 |
| 22609 | 295290.67 | 6127801.67 |

|       |           |            |
|-------|-----------|------------|
| 22610 | 295349.32 | 6125798.42 |
| 22611 | 295450.64 | 6125811.48 |
| 22612 | 299170.32 | 6127555.63 |
| 22613 | 299235.60 | 6127605.18 |
| 22614 | 296997.99 | 6127497.14 |
| 22615 | 293244.16 | 6127098.94 |
| 22616 | 293331.19 | 6127044.34 |
| 22617 | 297264.04 | 6128165.45 |
| 22618 | 297303.99 | 6128155.35 |
| 22619 | 297159.70 | 6128190.67 |
| 22620 | 295986.01 | 6127993.36 |
| 22621 | 295997.15 | 6128095.75 |
| 22622 | 295998.61 | 6128107.55 |
| 22623 | 299010.36 | 6129099.63 |
| 22624 | 297052.29 | 6128734.52 |
| 22625 | 295329.85 | 6127283.83 |
| 22626 | 295221.82 | 6127405.46 |
| 22627 | 299060.86 | 6127476.58 |
| 22628 | 298487.99 | 6127782.53 |
| 22629 | 298419.63 | 6127656.98 |
| 22630 | 295057.92 | 6127612.37 |
| 22631 | 295121.02 | 6127606.71 |
| 22632 | 295225.48 | 6127559.41 |
| 22633 | 296606.86 | 6128804.51 |
| 22634 | 294756.78 | 6128046.65 |
| 22635 | 294739.60 | 6128049.34 |
| 22636 | 295971.55 | 6128593.34 |
| 22637 | 294475.87 | 6127529.07 |
| 22638 | 294623.12 | 6127523.23 |
| 22639 | 295433.78 | 6128552.05 |
| 22640 | 298698.98 | 6129126.64 |
| 22641 | 298556.90 | 6129043.89 |
| 22642 | 298557.27 | 6129045.86 |
| 22643 | 298972.61 | 6127541.39 |
| 22644 | 295544.30 | 6128325.17 |
| 22645 | 293358.78 | 6126835.52 |
| 22646 | 293740.67 | 6127743.38 |
| 22647 | 297707.35 | 6127336.01 |
| 22648 | 297676.32 | 6127176.33 |
| 22649 | 297680.44 | 6127387.82 |
| 22650 | 297824.45 | 6127719.36 |
| 22651 | 295514.72 | 6125530.63 |
| 22652 | 295708.00 | 6125989.67 |
| 22653 | 295242.73 | 6124869.01 |
| 22654 | 295242.81 | 6124871.01 |
| 22655 | 297636.35 | 6126724.31 |
| 22656 | 297636.68 | 6126726.29 |
| 22657 | 297673.42 | 6126718.03 |
| 22658 | 297673.76 | 6126720.00 |
| 22659 | 297613.07 | 6126802.32 |

|       |           |            |
|-------|-----------|------------|
| 22660 | 297611.48 | 6126804.64 |
| 22661 | 297453.68 | 6126926.86 |
| 22662 | 297450.41 | 6126983.68 |
| 22663 | 297529.52 | 6127046.28 |
| 22664 | 296626.61 | 6126665.08 |
| 22665 | 296624.64 | 6126664.73 |
| 22666 | 294562.15 | 6125433.10 |
| 22667 | 294707.41 | 6126280.89 |
| 22668 | 294876.02 | 6125495.97 |
| 22669 | 294968.74 | 6125487.69 |
| 22670 | 294966.76 | 6125487.47 |
| 22671 | 294654.62 | 6125289.12 |
| 22672 | 294654.00 | 6125287.22 |
| 22673 | 294687.96 | 6126465.25 |
| 22674 | 294686.00 | 6126465.65 |
| 22675 | 294446.38 | 6126624.32 |
| 22676 | 294446.87 | 6126626.26 |
| 22677 | 294686.14 | 6125810.09 |
| 22678 | 295887.84 | 6125568.26 |
| 22679 | 294748.28 | 6126306.83 |
| 22680 | 294749.58 | 6126305.31 |
| 22681 | 294627.88 | 6124677.41 |
| 22682 | 298603.14 | 6129137.80 |
| 22683 | 298576.89 | 6129149.68 |
| 22684 | 298045.47 | 6127512.55 |
| 22685 | 294522.81 | 6127855.31 |
| 22686 | 294866.69 | 6125579.51 |
| 22687 | 295111.67 | 6126692.58 |
| 22688 | 297248.21 | 6128317.34 |
| 22689 | 295306.63 | 6128278.52 |
| 22690 | 293514.42 | 6126899.73 |
| 22691 | 296745.45 | 6128257.84 |
| 22692 | 296744.40 | 6128254.96 |
| 22693 | 296606.18 | 6128272.64 |
| 22694 | 294947.33 | 6125292.00 |
| 22695 | 294937.63 | 6125382.75 |
| 22696 | 294937.40 | 6125384.74 |
| 22697 | 294979.24 | 6125388.88 |
| 22698 | 293174.56 | 6126809.03 |
| 22699 | 293157.29 | 6126797.03 |
| 22700 | 297542.73 | 6127147.66 |
| 22701 | 293830.39 | 6126722.92 |
| 22702 | 293860.13 | 6126718.97 |
| 22703 | 298757.82 | 6129077.25 |
| 22704 | 298918.89 | 6129051.81 |
| 22705 | 293104.26 | 6127127.17 |
| 22706 | 297192.83 | 6128330.14 |
| 22707 | 298069.22 | 6127766.70 |
| 22708 | 298088.12 | 6127795.65 |
| 22709 | 298100.63 | 6127815.73 |

|       |           |            |
|-------|-----------|------------|
| 22710 | 298167.81 | 6127791.51 |
| 22711 | 295158.85 | 6128287.95 |
| 22712 | 298942.10 | 6128054.12 |
| 22713 | 295984.38 | 6128135.76 |
| 22714 | 297319.25 | 6128077.16 |
| 22715 | 297336.35 | 6128147.65 |
| 22716 | 297285.50 | 6128080.39 |
| 22717 | 297244.55 | 6128084.17 |
| 22718 | 295178.72 | 6125263.26 |
| 22719 | 295247.51 | 6125240.19 |
| 22720 | 298516.61 | 6127955.24 |
| 22721 | 298524.62 | 6127991.41 |
| 22722 | 296706.36 | 6128004.30 |
| 22723 | 296704.62 | 6127987.95 |
| 22724 | 296990.88 | 6128010.12 |
| 22725 | 296991.28 | 6128011.29 |
| 22726 | 295929.91 | 6127357.37 |
| 22727 | 297208.33 | 6128220.78 |
| 22728 | 297509.18 | 6128135.32 |
| 22729 | 297526.08 | 6128234.17 |
| 22730 | 298550.55 | 6127192.69 |
| 22731 | 297928.26 | 6127297.97 |
| 22732 | 294776.35 | 6127526.12 |
| 22733 | 294778.35 | 6127526.01 |
| 22734 | 298999.00 | 6129017.99 |
| 22735 | 298678.98 | 6129020.82 |
| 22736 | 297460.11 | 6127389.88 |
| 22737 | 297460.47 | 6127391.85 |
| 22738 | 298886.07 | 6128301.25 |
| 22739 | 298896.73 | 6128337.51 |
| 22740 | 298918.07 | 6128410.04 |
| 22741 | 298928.77 | 6128446.44 |
| 22742 | 298939.94 | 6128484.42 |
| 22743 | 299083.30 | 6128160.35 |
| 22744 | 298864.74 | 6128228.73 |
| 22745 | 298879.79 | 6128224.30 |
| 22746 | 295889.27 | 6126511.11 |
| 22747 | 295968.18 | 6126519.34 |
| 22748 | 295843.87 | 6126769.12 |
| 22749 | 295843.31 | 6126773.08 |
| 22750 | 295945.37 | 6127439.30 |
| 22751 | 295958.63 | 6127118.39 |
| 22752 | 295266.41 | 6126567.68 |
| 22753 | 295221.74 | 6127035.21 |
| 22754 | 295217.75 | 6127034.84 |
| 22755 | 295309.62 | 6126191.66 |
| 22756 | 295403.59 | 6128281.90 |
| 22757 | 294757.07 | 6128044.68 |
| 22758 | 294758.15 | 6128046.41 |
| 22759 | 294739.85 | 6128047.35 |

|       |           |            |
|-------|-----------|------------|
| 22760 | 294739.36 | 6128051.32 |
| 22761 | 297940.62 | 6127300.76 |
| 22762 | 296629.05 | 6128177.26 |
| 22763 | 296602.19 | 6128019.43 |
| 22764 | 296594.78 | 6128184.06 |
| 22765 | 296629.39 | 6128179.23 |
| 22766 | 296743.71 | 6128253.08 |
| 22767 | 296729.73 | 6128165.24 |
| 22768 | 298138.47 | 6127664.26 |
| 22769 | 298218.73 | 6127537.53 |
| 22770 | 295924.44 | 6128629.64 |
| 22771 | 297195.06 | 6126838.52 |
| 22772 | 297213.50 | 6126620.95 |
| 22773 | 295403.38 | 6128348.41 |
| 22774 | 295352.13 | 6125264.94 |
| 22775 | 295350.23 | 6125265.57 |
| 22776 | 297420.93 | 6128069.77 |
| 22777 | 297438.59 | 6128140.25 |
| 22778 | 295388.96 | 6125197.48 |
| 22779 | 295388.90 | 6125192.93 |
| 22780 | 295390.33 | 6125192.88 |
| 22781 | 299077.45 | 6128148.09 |
| 22782 | 293724.38 | 6127696.10 |
| 22783 | 293772.27 | 6127673.66 |
| 22784 | 298875.40 | 6128264.99 |
| 22785 | 293717.36 | 6127641.94 |
| 22786 | 298898.47 | 6128343.27 |
| 22787 | 298747.09 | 6128194.32 |
| 22788 | 298746.62 | 6128192.38 |
| 22789 | 296563.19 | 6126145.86 |
| 22790 | 295405.41 | 6126328.41 |
| 22791 | 294973.17 | 6125072.63 |
| 22792 | 295045.46 | 6127263.06 |
| 22793 | 296591.05 | 6128926.34 |
| 22794 | 297939.01 | 6127331.53 |
| 22795 | 298170.73 | 6127710.00 |
| 22796 | 295865.14 | 6125712.86 |
| 22797 | 294822.45 | 6125740.81 |
| 22798 | 294790.26 | 6125619.99 |
| 22799 | 294890.03 | 6125631.06 |
| 22800 | 294794.11 | 6125571.72 |
| 22801 | 294871.80 | 6125534.41 |
| 22802 | 294798.85 | 6125526.57 |
| 22803 | 297430.90 | 6128154.77 |
| 22804 | 297457.05 | 6128146.21 |
| 22805 | 297699.23 | 6127292.26 |
| 22806 | 293852.78 | 6127882.91 |
| 22807 | 296914.07 | 6128230.07 |
| 22808 | 296586.57 | 6128185.23 |
| 22809 | 297819.32 | 6126846.49 |

|       |           |            |
|-------|-----------|------------|
| 22810 | 299090.93 | 6129041.32 |
| 22811 | 298550.19 | 6127188.21 |
| 22812 | 298843.54 | 6127951.14 |
| 22813 | 298844.00 | 6127953.08 |
| 22814 | 298878.56 | 6127942.82 |
| 22815 | 298926.50 | 6127978.86 |
| 22816 | 298671.05 | 6128002.72 |
| 22817 | 298673.00 | 6128002.28 |
| 22818 | 298653.17 | 6128214.16 |
| 22819 | 298785.00 | 6128122.42 |
| 22820 | 298785.43 | 6128124.37 |
| 22821 | 298816.26 | 6128115.55 |
| 22822 | 298816.68 | 6128117.51 |
| 22823 | 298801.80 | 6128085.84 |
| 22824 | 298801.33 | 6128083.89 |
| 22825 | 296457.50 | 6126076.56 |
| 22826 | 296459.49 | 6126076.39 |
| 22827 | 296568.82 | 6126208.60 |
| 22828 | 296556.21 | 6126068.15 |
| 22829 | 296564.31 | 6125995.04 |
| 22830 | 296562.32 | 6125995.25 |
| 22831 | 296148.17 | 6126051.61 |
| 22832 | 296150.16 | 6126051.83 |
| 22833 | 296137.24 | 6126165.12 |
| 22834 | 296135.96 | 6126174.08 |
| 22835 | 296332.56 | 6126076.28 |
| 22836 | 294642.58 | 6124719.70 |
| 22837 | 294641.93 | 6124717.81 |
| 22838 | 294641.48 | 6124822.25 |
| 22839 | 294640.78 | 6124820.38 |
| 22840 | 297865.84 | 6127219.79 |
| 22841 | 297866.20 | 6127221.75 |
| 22842 | 297863.87 | 6127220.12 |
| 22843 | 297462.08 | 6127389.53 |
| 22844 | 297544.70 | 6127147.30 |
| 22845 | 297508.85 | 6128133.35 |
| 22846 | 293682.41 | 6126732.21 |
| 22847 | 293682.14 | 6126730.23 |
| 22848 | 295805.21 | 6126131.43 |
| 22849 | 296017.87 | 6125583.55 |
| 22850 | 296019.86 | 6125583.77 |
| 22851 | 296135.50 | 6125596.65 |
| 22852 | 296133.51 | 6125596.44 |
| 22853 | 296185.78 | 6125751.34 |
| 22854 | 295895.57 | 6126466.11 |
| 22855 | 295897.56 | 6126466.35 |
| 22856 | 294618.91 | 6125203.41 |
| 22857 | 294657.84 | 6125307.15 |
| 22858 | 295265.67 | 6125293.61 |
| 22859 | 295257.04 | 6125268.10 |

|       |           |            |
|-------|-----------|------------|
| 22860 | 295859.21 | 6127602.26 |
| 22861 | 297545.56 | 6126546.40 |
| 22862 | 294761.51 | 6127630.79 |
| 22863 | 294777.01 | 6127637.64 |
| 22864 | 297096.58 | 6127480.07 |
| 22865 | 298208.25 | 6127251.66 |
| 22866 | 298213.16 | 6127250.74 |
| 22867 | 295741.43 | 6127620.50 |
| 22868 | 295738.97 | 6127562.48 |
| 22869 | 296854.71 | 6128779.57 |
| 22870 | 298708.43 | 6127710.59 |
| 22871 | 298647.61 | 6127728.05 |
| 22872 | 298774.41 | 6127798.18 |
| 22873 | 296904.36 | 6127880.02 |
| 22874 | 296917.01 | 6127878.64 |
| 22875 | 296978.82 | 6127715.25 |
| 22876 | 296968.58 | 6127708.81 |
| 22877 | 297018.01 | 6128215.26 |
| 22878 | 299015.48 | 6128263.19 |
| 22879 | 299036.81 | 6128335.72 |
| 22880 | 299174.22 | 6128295.30 |
| 22881 | 298236.38 | 6128966.06 |
| 22882 | 298771.63 | 6127892.77 |
| 22883 | 298662.25 | 6127954.30 |
| 22884 | 298691.26 | 6127948.05 |
| 22885 | 298616.52 | 6127974.11 |
| 22886 | 298662.35 | 6127964.51 |
| 22887 | 299210.15 | 6128363.69 |
| 22888 | 298907.40 | 6128373.78 |
| 22889 | 293629.91 | 6127729.22 |
| 22890 | 293860.96 | 6127693.19 |
| 22891 | 293826.64 | 6127667.52 |
| 22892 | 293808.16 | 6127628.93 |
| 22893 | 294376.33 | 6127862.92 |
| 22894 | 297730.02 | 6127050.15 |
| 22895 | 297735.91 | 6127084.65 |
| 22896 | 298478.15 | 6127733.32 |
| 22897 | 297222.16 | 6128404.82 |
| 22898 | 296598.19 | 6128922.48 |
| 22899 | 294771.35 | 6127955.05 |
| 22900 | 298862.70 | 6128148.35 |
| 22901 | 298825.11 | 6128156.61 |
| 22902 | 295066.67 | 6126035.29 |
| 22903 | 295094.53 | 6126039.20 |
| 22904 | 295080.44 | 6126144.41 |
| 22905 | 297700.28 | 6127298.01 |
| 22906 | 297825.81 | 6127026.04 |
| 22907 | 294656.08 | 6125994.21 |
| 22908 | 294723.78 | 6125998.71 |
| 22909 | 294422.32 | 6127200.86 |

|       |           |            |
|-------|-----------|------------|
| 22910 | 294469.58 | 6127186.82 |
| 22911 | 294520.16 | 6124718.12 |
| 22912 | 294532.28 | 6124751.77 |
| 22913 | 294814.58 | 6125371.23 |
| 22914 | 294810.49 | 6125409.54 |
| 22915 | 294815.79 | 6125361.31 |
| 22916 | 294814.82 | 6125369.25 |
| 22917 | 294730.37 | 6125167.84 |
| 22918 | 294778.41 | 6125253.89 |
| 22919 | 294768.46 | 6125252.90 |
| 22920 | 296541.49 | 6127756.45 |
| 22921 | 296538.15 | 6127718.60 |
| 22922 | 296569.28 | 6127753.17 |
| 22923 | 296565.57 | 6127712.34 |
| 22924 | 295998.89 | 6125745.44 |
| 22925 | 296047.92 | 6125751.78 |
| 22926 | 297409.54 | 6127271.85 |
| 22927 | 294097.30 | 6126494.20 |
| 22928 | 294183.58 | 6126626.25 |
| 22929 | 294104.61 | 6126639.96 |
| 22930 | 295990.48 | 6128682.90 |
| 22931 | 295990.81 | 6128687.89 |
| 22932 | 295988.30 | 6128647.97 |
| 22933 | 295988.86 | 6128657.95 |
| 22934 | 295985.39 | 6128598.06 |
| 22935 | 295989.90 | 6128673.42 |
| 22936 | 296030.45 | 6128681.33 |
| 22937 | 295992.48 | 6128682.82 |
| 22938 | 296028.28 | 6128646.90 |
| 22939 | 295990.30 | 6128647.91 |
| 22940 | 294411.68 | 6126178.33 |
| 22941 | 295735.97 | 6126632.15 |
| 22942 | 298915.94 | 6127933.84 |
| 22943 | 298947.82 | 6127925.49 |
| 22944 | 296214.59 | 6125368.59 |
| 22945 | 295460.78 | 6125365.30 |
| 22946 | 295406.30 | 6125357.73 |
| 22947 | 295449.44 | 6128135.70 |
| 22948 | 295443.39 | 6128092.98 |
| 22949 | 295482.07 | 6128131.10 |
| 22950 | 295475.96 | 6128087.98 |
| 22951 | 296501.92 | 6128413.78 |
| 22952 | 296534.57 | 6128408.97 |
| 22953 | 295873.00 | 6125217.17 |
| 22954 | 293173.91 | 6127336.63 |
| 22955 | 295841.61 | 6128518.18 |
| 22956 | 295882.36 | 6128463.32 |
| 22957 | 295913.52 | 6128514.56 |
| 22958 | 295598.27 | 6128357.08 |
| 22959 | 295600.69 | 6128415.03 |



|       |           |            |
|-------|-----------|------------|
| 22960 | 295533.04 | 6128360.37 |
| 22961 | 294662.50 | 6127570.67 |
| 22962 | 294662.10 | 6127523.82 |
| 22963 | 294662.08 | 6127521.82 |
| 22964 | 296890.09 | 6126320.99 |
| 22965 | 296918.37 | 6126443.85 |
| 22966 | 296932.97 | 6126447.32 |
| 22967 | 295449.72 | 6128137.68 |
| 22968 | 295463.35 | 6128135.76 |
| 22969 | 297030.46 | 6127414.53 |
| 22970 | 297127.99 | 6127405.62 |
| 22971 | 294906.34 | 6125584.06 |
| 22972 | 297239.58 | 6127667.43 |
| 22973 | 295719.03 | 6127944.84 |
| 22974 | 296838.14 | 6127512.50 |
| 22975 | 296811.42 | 6127626.54 |
| 22976 | 295579.04 | 6128418.17 |
| 22977 | 295600.77 | 6128417.03 |
| 22978 | 296825.65 | 6128243.87 |
| 22979 | 296832.39 | 6128295.40 |
| 22980 | 296634.48 | 6126336.96 |
| 22981 | 298957.68 | 6128820.59 |
| 22982 | 295227.68 | 6127966.76 |
| 22983 | 294433.13 | 6124787.67 |
| 22984 | 294443.91 | 6124783.69 |
| 22985 | 295072.60 | 6127929.08 |
| 22986 | 298906.67 | 6127864.81 |
| 22987 | 297584.09 | 6127357.88 |
| 22988 | 294493.36 | 6127082.13 |
| 22989 | 294491.06 | 6127058.19 |
| 22990 | 298799.80 | 6128852.46 |
| 22991 | 298760.50 | 6128859.89 |
| 22992 | 294955.61 | 6125220.90 |
| 22993 | 294960.01 | 6125181.69 |
| 22994 | 297446.98 | 6127212.18 |
| 22995 | 297469.64 | 6127336.46 |
| 22996 | 297619.62 | 6127133.99 |
| 22997 | 297627.42 | 6127185.77 |
| 22998 | 297620.03 | 6127286.11 |
| 22999 | 294502.28 | 6124979.82 |
| 23000 | 294620.74 | 6125209.04 |
| 23001 | 294688.53 | 6125391.43 |
| 23002 | 294764.62 | 6125271.52 |
| 23003 | 294886.21 | 6125169.28 |
| 23004 | 294450.75 | 6126641.68 |
| 23005 | 294434.21 | 6126574.89 |
| 23006 | 294481.25 | 6126566.62 |
| 23007 | 294780.26 | 6127904.02 |
| 23008 | 295003.14 | 6125263.81 |
| 23009 | 294760.14 | 6125859.62 |

|       |           |            |
|-------|-----------|------------|
| 23010 | 294946.28 | 6125688.63 |
| 23011 | 294744.16 | 6128187.55 |
| 23012 | 294749.51 | 6128142.79 |
| 23013 | 294999.40 | 6128020.03 |
| 23014 | 295037.98 | 6127913.71 |
| 23015 | 295044.32 | 6127995.46 |
| 23016 | 298740.07 | 6128165.15 |
| 23017 | 298776.75 | 6128189.55 |
| 23018 | 294825.82 | 6125278.95 |
| 23019 | 295161.78 | 6124871.47 |
| 23020 | 295160.84 | 6125071.43 |
| 23021 | 295237.78 | 6125068.59 |
| 23022 | 296608.95 | 6128997.59 |
| 23023 | 295744.70 | 6127663.34 |
| 23024 | 295118.82 | 6126167.73 |
| 23025 | 295162.53 | 6126172.75 |
| 23026 | 296292.22 | 6128435.10 |
| 23027 | 296207.47 | 6128487.50 |
| 23028 | 296242.98 | 6128471.15 |
| 23029 | 294296.14 | 6124734.06 |
| 23030 | 296901.99 | 6128231.69 |
| 23031 | 296874.57 | 6127619.79 |
| 23032 | 296856.99 | 6127522.25 |
| 23033 | 296847.65 | 6127885.74 |
| 23034 | 294312.21 | 6126867.62 |
| 23035 | 294360.65 | 6126933.48 |
| 23036 | 295035.06 | 6127264.01 |
| 23037 | 296300.00 | 6128252.67 |
| 23038 | 296385.10 | 6128240.24 |
| 23039 | 295733.19 | 6125846.96 |
| 23040 | 295762.37 | 6125850.33 |
| 23041 | 294563.25 | 6125999.75 |
| 23042 | 294483.72 | 6126524.70 |
| 23043 | 294494.08 | 6126564.37 |
| 23044 | 296761.53 | 6127785.52 |
| 23045 | 294775.26 | 6126121.78 |
| 23046 | 294778.65 | 6126088.96 |
| 23047 | 294778.85 | 6126086.97 |
| 23048 | 294783.76 | 6126087.39 |
| 23049 | 294581.30 | 6126071.53 |
| 23050 | 294614.74 | 6126058.20 |
| 23051 | 295872.47 | 6128302.47 |
| 23052 | 295896.79 | 6128299.47 |
| 23053 | 295230.54 | 6128281.38 |
| 23054 | 295222.73 | 6128204.68 |
| 23055 | 296300.46 | 6128221.52 |
| 23056 | 295143.69 | 6125202.27 |
| 23057 | 295146.65 | 6125180.47 |
| 23058 | 295321.03 | 6127929.44 |
| 23059 | 298785.81 | 6127819.07 |

|       |           |            |
|-------|-----------|------------|
| 23060 | 297756.17 | 6126704.55 |
| 23061 | 297769.47 | 6126773.78 |
| 23062 | 297755.44 | 6126700.61 |
| 23063 | 297747.46 | 6126656.33 |
| 23064 | 295130.46 | 6127821.97 |
| 23065 | 293950.02 | 6127854.19 |
| 23066 | 298801.25 | 6127961.31 |
| 23067 | 298793.86 | 6128163.47 |
| 23068 | 298704.50 | 6128172.65 |
| 23069 | 295295.52 | 6126308.85 |
| 23070 | 295296.33 | 6126301.13 |
| 23071 | 295047.45 | 6127267.22 |
| 23072 | 294987.64 | 6127271.97 |
| 23073 | 297689.03 | 6126998.56 |
| 23074 | 295097.10 | 6125158.90 |
| 23075 | 295146.68 | 6125165.35 |
| 23076 | 295148.66 | 6125165.61 |
| 23077 | 295138.87 | 6125238.95 |
| 23078 | 294507.94 | 6126309.08 |
| 23079 | 294481.26 | 6126523.17 |
| 23080 | 294557.53 | 6126494.40 |
| 23081 | 294559.64 | 6126502.82 |
| 23082 | 294807.36 | 6125440.86 |
| 23084 | 294706.55 | 6125444.82 |
| 23085 | 294974.85 | 6125435.68 |
| 23086 | 294989.18 | 6127510.02 |
| 23087 | 294996.06 | 6127509.42 |
| 23088 | 294480.44 | 6126005.03 |
| 23089 | 294518.10 | 6126002.63 |
| 23090 | 296734.31 | 6127484.70 |
| 23091 | 296737.29 | 6127510.65 |
| 23092 | 296721.89 | 6127512.21 |
| 23093 | 296700.71 | 6127638.49 |
| 23094 | 293968.14 | 6127516.87 |
| 23095 | 294086.85 | 6125749.34 |
| 23096 | 294114.64 | 6125801.38 |
| 23097 | 294138.18 | 6125743.63 |
| 23098 | 296029.25 | 6126537.38 |
| 23099 | 296031.71 | 6126515.51 |
| 23100 | 295973.86 | 6126476.72 |
| 23101 | 294916.66 | 6124875.74 |
| 23102 | 294554.50 | 6124705.70 |
| 23103 | 295500.79 | 6128260.20 |
| 23104 | 295494.93 | 6128218.83 |
| 23105 | 295583.36 | 6128179.62 |
| 23106 | 295592.92 | 6128247.15 |
| 23107 | 295753.40 | 6126508.42 |
| 23108 | 294615.58 | 6124641.45 |
| 23109 | 294608.76 | 6124731.37 |
| 23110 | 298151.23 | 6127656.51 |

|       |           |            |
|-------|-----------|------------|
| 23111 | 295606.67 | 6128530.96 |
| 23112 | 295647.55 | 6128528.28 |
| 23113 | 294836.18 | 6127632.29 |
| 23114 | 294619.81 | 6127753.70 |
| 23115 | 298478.30 | 6129161.08 |
| 23116 | 298706.80 | 6127994.76 |
| 23117 | 298343.89 | 6127686.50 |
| 23118 | 294865.30 | 6126667.58 |
| 23119 | 294893.17 | 6126670.24 |
| 23120 | 294855.23 | 6127083.58 |
| 23121 | 295171.29 | 6126048.90 |
| 23122 | 295175.71 | 6126054.50 |
| 23123 | 295078.44 | 6126160.30 |
| 23124 | 295118.58 | 6126169.72 |
| 23125 | 295113.97 | 6126207.44 |
| 23126 | 297873.76 | 6127597.03 |
| 23127 | 297821.05 | 6127770.83 |
| 23128 | 297762.44 | 6127781.15 |
| 23129 | 296445.64 | 6126330.42 |
| 23130 | 296495.90 | 6126335.50 |
| 23131 | 294406.31 | 6126413.90 |
| 23132 | 294394.75 | 6126414.66 |
| 23133 | 296351.16 | 6127943.24 |
| 23134 | 294759.45 | 6124780.94 |
| 23135 | 294611.20 | 6124832.74 |
| 23136 | 294647.49 | 6124672.91 |
| 23137 | 294674.11 | 6124664.26 |
| 23138 | 296868.06 | 6128330.80 |
| 23139 | 296866.14 | 6128311.49 |
| 23140 | 296817.64 | 6128336.26 |
| 23141 | 296815.20 | 6128320.39 |
| 23142 | 296868.26 | 6128332.79 |
| 23143 | 297130.89 | 6128209.87 |
| 23144 | 297120.29 | 6128132.10 |
| 23145 | 299354.65 | 6127945.29 |
| 23146 | 294431.59 | 6124597.22 |
| 23147 | 294461.61 | 6124586.12 |
| 23148 | 296067.85 | 6125272.28 |
| 23149 | 296016.99 | 6125207.62 |
| 23150 | 293852.04 | 6125652.58 |
| 23151 | 293713.29 | 6128002.56 |
| 23152 | 293714.13 | 6128002.02 |
| 23153 | 297064.60 | 6127885.20 |
| 23154 | 297101.12 | 6127881.05 |
| 23155 | 297106.23 | 6127930.52 |
| 23156 | 297152.74 | 6127875.18 |
| 23157 | 297148.56 | 6127875.66 |
| 23158 | 297192.59 | 6127870.65 |
| 23159 | 294086.40 | 6127856.24 |
| 23160 | 294105.06 | 6127875.25 |

|       |           |            |
|-------|-----------|------------|
| 23161 | 294526.50 | 6126957.19 |
| 23162 | 295961.25 | 6124976.79 |
| 23163 | 295982.27 | 6124962.50 |
| 23164 | 293983.04 | 6127884.63 |
| 23165 | 294019.98 | 6127920.44 |
| 23166 | 293624.64 | 6128057.78 |
| 23167 | 293609.17 | 6128067.61 |
| 23168 | 293538.61 | 6127957.28 |
| 23169 | 293478.00 | 6127861.22 |
| 23170 | 293467.37 | 6128001.97 |
| 23171 | 293411.81 | 6127912.95 |
| 23172 | 293502.65 | 6127979.54 |
| 23173 | 293447.48 | 6127890.51 |
| 23174 | 293576.41 | 6127930.98 |
| 23175 | 293521.49 | 6127843.53 |
| 23176 | 293612.77 | 6127910.24 |
| 23177 | 293556.98 | 6127820.98 |
| 23178 | 293647.07 | 6127886.19 |
| 23179 | 293592.54 | 6127798.35 |
| 23180 | 293358.93 | 6127966.81 |
| 23181 | 293334.85 | 6127950.69 |
| 23182 | 293790.67 | 6127962.61 |
| 23183 | 293860.24 | 6127892.36 |
| 23184 | 293883.19 | 6128107.19 |
| 23185 | 293890.58 | 6128122.00 |
| 23186 | 293861.86 | 6128074.75 |
| 23187 | 293916.41 | 6127888.59 |
| 23188 | 293434.52 | 6128022.77 |
| 23189 | 293526.71 | 6127964.74 |
| 23190 | 295824.75 | 6127908.14 |
| 23191 | 298417.04 | 6127809.77 |
| 23192 | 295209.56 | 6125177.19 |
| 23193 | 295240.53 | 6125175.94 |
| 23194 | 294520.28 | 6125183.72 |
| 23195 | 297281.64 | 6126626.78 |
| 23196 | 297335.52 | 6126630.51 |
| 23197 | 294476.27 | 6127686.70 |
| 23198 | 294478.78 | 6127853.67 |
| 23199 | 294478.81 | 6127855.67 |
| 23200 | 295331.06 | 6125212.75 |
| 23201 | 298900.19 | 6128065.38 |
| 23202 | 294586.76 | 6127284.21 |
| 23203 | 295145.05 | 6128005.39 |
| 23204 | 294755.28 | 6125910.26 |
| 23205 | 294770.17 | 6128045.42 |
| 23206 | 294764.10 | 6128045.98 |
| 23207 | 295153.85 | 6125128.98 |
| 23208 | 295167.42 | 6125351.36 |
| 23209 | 298524.05 | 6128174.28 |
| 23210 | 298512.04 | 6128124.25 |

|       |           |            |
|-------|-----------|------------|
| 23211 | 298483.26 | 6128141.44 |
| 23212 | 298525.73 | 6128239.77 |
| 23213 | 298677.13 | 6128024.11 |
| 23214 | 298677.58 | 6128025.67 |
| 23215 | 299153.62 | 6128263.55 |
| 23216 | 299215.27 | 6128373.43 |
| 23217 | 297004.00 | 6128326.67 |
| 23218 | 296999.75 | 6128292.94 |
| 23219 | 297004.25 | 6128328.65 |
| 23220 | 297029.98 | 6128324.92 |
| 23221 | 295639.17 | 6125533.50 |
| 23222 | 295661.06 | 6125371.99 |
| 23223 | 296304.15 | 6125614.05 |
| 23224 | 296262.10 | 6125460.87 |
| 23225 | 296295.02 | 6125462.73 |
| 23226 | 296390.78 | 6125657.60 |
| 23227 | 295813.20 | 6125451.46 |
| 23228 | 295773.17 | 6125445.89 |
| 23229 | 293675.27 | 6127323.06 |
| 23230 | 293513.53 | 6127144.74 |
| 23231 | 293497.81 | 6127217.20 |
| 23232 | 293445.85 | 6127219.54 |
| 23233 | 295739.30 | 6125695.77 |
| 23234 | 295769.03 | 6125699.77 |
| 23235 | 295875.41 | 6125568.56 |
| 23236 | 295751.66 | 6125605.62 |
| 23237 | 294391.35 | 6124793.54 |
| 23238 | 296415.52 | 6126077.73 |
| 23239 | 293990.16 | 6127775.38 |
| 23240 | 297696.92 | 6126478.44 |
| 23241 | 296155.92 | 6127870.54 |
| 23242 | 296364.72 | 6126587.99 |
| 23243 | 296520.52 | 6128030.28 |
| 23244 | 296543.22 | 6128027.49 |
| 23245 | 296547.55 | 6128187.95 |
| 23246 | 296472.42 | 6128200.23 |
| 23247 | 294881.15 | 6125212.30 |
| 23248 | 295153.63 | 6124687.67 |
| 23249 | 295211.15 | 6124797.49 |
| 23250 | 294474.01 | 6126840.18 |
| 23251 | 294606.72 | 6127940.49 |
| 23252 | 298237.36 | 6127788.89 |
| 23253 | 295361.42 | 6128512.49 |
| 23254 | 295264.62 | 6127706.08 |
| 23255 | 298213.47 | 6127325.71 |
| 23256 | 295320.91 | 6125089.65 |
| 23257 | 293657.27 | 6126542.17 |
| 23258 | 293781.92 | 6126525.55 |
| 23259 | 293880.62 | 6126512.39 |
| 23260 | 296371.26 | 6128158.06 |

|       |           |            |
|-------|-----------|------------|
| 23261 | 296698.96 | 6127640.68 |
| 23262 | 296733.13 | 6127536.97 |
| 23263 | 297585.12 | 6127401.67 |
| 23264 | 297600.53 | 6127398.98 |
| 23265 | 296769.43 | 6125944.15 |
| 23266 | 293912.81 | 6127321.01 |
| 23267 | 293415.24 | 6127183.97 |
| 23268 | 293454.18 | 6127250.97 |
| 23269 | 293444.91 | 6127217.77 |
| 23270 | 296018.98 | 6127885.26 |
| 23271 | 295994.01 | 6127980.49 |
| 23272 | 295989.18 | 6127931.92 |
| 23273 | 296043.00 | 6127823.36 |
| 23274 | 295890.37 | 6127443.38 |
| 23275 | 296510.90 | 6126643.31 |
| 23276 | 296890.67 | 6126097.78 |
| 23277 | 295850.94 | 6126635.27 |
| 23278 | 294563.11 | 6125650.00 |
| 23279 | 294571.91 | 6125470.18 |
| 23280 | 294558.36 | 6125434.38 |
| 23281 | 294513.06 | 6125450.24 |
| 23282 | 294526.11 | 6125500.41 |
| 23283 | 294819.82 | 6124951.07 |
| 23284 | 294829.26 | 6124979.95 |
| 23285 | 295247.37 | 6125924.74 |
| 23286 | 295252.20 | 6125883.08 |
| 23287 | 296245.76 | 6127653.05 |
| 23288 | 296084.58 | 6127817.12 |
| 23289 | 296069.77 | 6127666.31 |
| 23290 | 296126.36 | 6127812.87 |
| 23291 | 296111.69 | 6127663.66 |
| 23292 | 295663.26 | 6124946.21 |
| 23293 | 296499.46 | 6125821.86 |
| 23294 | 296491.46 | 6125822.33 |
| 23295 | 295804.63 | 6127862.57 |
| 23296 | 293591.41 | 6126870.06 |
| 23297 | 293584.26 | 6126806.47 |
| 23298 | 293561.15 | 6126866.48 |
| 23299 | 293799.55 | 6125038.37 |
| 23300 | 293749.20 | 6124948.35 |
| 23301 | 293798.58 | 6125036.62 |
| 23302 | 295564.61 | 6128533.01 |
| 23303 | 296805.02 | 6127777.97 |
| 23304 | 296848.61 | 6127773.44 |
| 23305 | 296940.21 | 6127507.14 |
| 23306 | 296104.73 | 6125885.97 |
| 23307 | 296859.48 | 6128170.85 |
| 23308 | 296547.89 | 6128189.92 |
| 23309 | 294520.10 | 6126002.50 |
| 23310 | 295527.86 | 6128258.39 |

|       |           |            |
|-------|-----------|------------|
| 23311 | 295537.00 | 6128087.64 |
| 23312 | 297789.47 | 6126696.59 |
| 23313 | 293930.60 | 6126935.93 |
| 23314 | 296738.44 | 6126502.51 |
| 23315 | 296733.81 | 6126532.62 |
| 23316 | 294977.89 | 6127781.43 |
| 23317 | 295245.81 | 6124970.45 |
| 23318 | 295009.34 | 6127510.28 |
| 23319 | 295015.35 | 6127560.92 |
| 23320 | 294989.01 | 6127508.03 |
| 23321 | 294985.51 | 6127468.19 |
| 23322 | 297514.38 | 6126973.87 |
| 23323 | 296024.13 | 6127825.26 |
| 23324 | 296009.52 | 6127886.11 |
| 23325 | 294533.65 | 6125348.94 |
| 23326 | 294614.81 | 6125302.94 |
| 23327 | 294585.47 | 6124894.94 |
| 23328 | 294632.19 | 6124878.07 |
| 23329 | 294616.32 | 6124989.28 |
| 23330 | 294597.68 | 6124935.08 |
| 23331 | 295772.51 | 6127371.91 |
| 23332 | 295795.62 | 6127370.07 |
| 23333 | 295745.67 | 6127133.08 |
| 23334 | 295748.96 | 6127174.92 |
| 23335 | 295831.03 | 6127367.27 |
| 23336 | 295747.66 | 6127132.94 |
| 23337 | 294443.34 | 6124939.55 |
| 23338 | 294458.42 | 6124983.01 |
| 23339 | 294428.76 | 6124899.10 |
| 23340 | 294442.01 | 6124935.78 |
| 23341 | 294445.33 | 6125110.78 |
| 23342 | 294440.35 | 6125099.13 |
| 23343 | 296302.70 | 6126194.52 |
| 23344 | 296299.44 | 6126220.98 |
| 23345 | 296352.33 | 6126200.66 |
| 23346 | 296263.14 | 6125444.60 |
| 23347 | 296610.85 | 6125939.13 |
| 23348 | 294425.72 | 6126224.06 |
| 23349 | 295339.49 | 6125656.54 |
| 23350 | 295341.30 | 6125664.33 |
| 23351 | 295388.67 | 6127724.05 |
| 23352 | 295328.25 | 6125983.99 |
| 23353 | 294476.30 | 6127674.21 |
| 23354 | 294870.31 | 6126097.22 |
| 23355 | 294891.87 | 6126099.48 |
| 23356 | 294987.25 | 6125986.18 |
| 23357 | 297455.99 | 6126889.63 |
| 23358 | 294951.89 | 6126747.29 |
| 23359 | 294908.97 | 6126995.55 |
| 23360 | 295062.89 | 6126048.89 |



|       |           |            |
|-------|-----------|------------|
| 23361 | 294699.40 | 6126347.73 |
| 23362 | 294688.70 | 6126453.10 |
| 23363 | 294768.03 | 6126339.98 |
| 23364 | 293865.43 | 6125344.08 |
| 23365 | 293861.01 | 6125346.42 |
| 23366 | 293857.55 | 6125252.59 |
| 23367 | 293820.88 | 6125368.63 |
| 23368 | 293821.42 | 6125274.05 |
| 23369 | 293860.05 | 6125344.67 |
| 23370 | 293858.51 | 6125254.34 |
| 23371 | 293897.14 | 6125324.96 |
| 23372 | 293868.81 | 6125243.76 |
| 23373 | 294100.71 | 6125114.67 |
| 23374 | 293982.57 | 6124955.99 |
| 23375 | 294031.87 | 6124936.55 |
| 23376 | 293988.06 | 6125002.31 |
| 23377 | 294048.24 | 6124980.54 |
| 23378 | 294117.02 | 6124684.17 |
| 23379 | 294099.06 | 6125991.11 |
| 23380 | 293881.05 | 6124859.14 |
| 23381 | 293988.42 | 6124818.25 |
| 23382 | 294006.00 | 6124860.78 |
| 23383 | 293990.29 | 6124817.54 |
| 23384 | 294134.86 | 6124974.90 |
| 23385 | 294714.61 | 6125122.00 |
| 23386 | 294640.18 | 6125045.08 |
| 23387 | 294685.68 | 6125029.82 |
| 23388 | 294686.30 | 6125031.72 |
| 23389 | 295673.78 | 6126232.77 |
| 23390 | 295676.34 | 6126213.41 |
| 23391 | 295786.05 | 6126965.35 |
| 23392 | 295783.42 | 6126929.44 |
| 23393 | 295834.16 | 6126953.73 |
| 23394 | 295835.00 | 6126963.26 |
| 23395 | 295708.55 | 6128352.25 |
| 23396 | 295717.47 | 6128522.82 |
| 23397 | 295713.80 | 6128451.66 |
| 23398 | 295689.04 | 6128480.45 |
| 23399 | 296077.14 | 6125475.20 |
| 23400 | 296417.60 | 6126000.16 |
| 23401 | 296410.59 | 6125946.68 |
| 23402 | 296313.12 | 6125935.25 |
| 23403 | 295871.51 | 6127733.49 |
| 23404 | 295986.82 | 6127711.31 |
| 23405 | 295988.16 | 6127724.24 |
| 23406 | 295862.83 | 6127906.58 |
| 23407 | 295896.98 | 6127908.42 |
| 23408 | 294115.59 | 6125803.14 |
| 23409 | 295031.66 | 6124993.50 |
| 23410 | 295032.98 | 6124984.30 |

|       |           |            |
|-------|-----------|------------|
| 23411 | 294368.01 | 6126490.49 |
| 23412 | 294702.17 | 6125896.37 |
| 23413 | 294767.83 | 6125806.77 |
| 23414 | 295825.45 | 6126899.91 |
| 23415 | 296550.43 | 6126342.69 |
| 23416 | 296543.01 | 6126391.50 |
| 23417 | 296703.78 | 6126001.13 |
| 23418 | 296734.01 | 6126145.73 |
| 23419 | 294375.22 | 6127471.51 |
| 23420 | 294315.50 | 6127681.52 |
| 23421 | 294388.09 | 6127683.92 |
| 23422 | 294386.84 | 6127787.50 |
| 23423 | 294388.51 | 6127740.81 |
| 23424 | 294388.83 | 6127787.58 |
| 23425 | 296734.28 | 6127897.69 |
| 23426 | 295831.26 | 6127369.25 |
| 23427 | 295836.32 | 6127413.69 |
| 23428 | 295293.87 | 6126189.56 |
| 23429 | 295283.24 | 6126440.81 |
| 23430 | 298337.53 | 6127785.54 |
| 23431 | 295028.68 | 6126263.63 |
| 23432 | 294929.34 | 6125997.76 |
| 23433 | 294912.21 | 6126101.59 |
| 23434 | 298382.47 | 6128016.52 |
| 23435 | 298516.18 | 6127953.29 |
| 23436 | 298518.14 | 6127952.89 |
| 23437 | 294786.31 | 6125636.79 |
| 23438 | 294784.43 | 6127850.69 |
| 23439 | 295055.71 | 6127828.04 |
| 23440 | 297817.35 | 6126846.88 |
| 23441 | 297665.00 | 6127097.06 |
| 23442 | 297612.48 | 6127088.54 |
| 23443 | 294680.89 | 6127219.78 |
| 23444 | 294650.91 | 6127387.16 |
| 23445 | 294685.17 | 6127385.60 |
| 23446 | 298676.65 | 6128209.20 |
| 23447 | 294798.86 | 6126861.60 |
| 23448 | 294815.92 | 6126704.27 |
| 23449 | 294735.51 | 6126798.74 |
| 23450 | 294659.78 | 6126576.21 |
| 23451 | 294649.83 | 6126578.29 |
| 23452 | 294756.46 | 6126795.38 |
| 23453 | 294820.16 | 6126676.59 |
| 23454 | 296827.47 | 6128239.59 |
| 23455 | 296821.22 | 6128171.83 |
| 23456 | 294014.77 | 6125095.36 |
| 23457 | 294082.61 | 6125071.23 |
| 23458 | 296874.37 | 6127791.87 |
| 23459 | 296892.73 | 6127777.45 |
| 23460 | 295809.34 | 6126110.15 |

|       |           |            |
|-------|-----------|------------|
| 23461 | 295815.81 | 6126060.26 |
| 23462 | 294106.04 | 6126647.49 |
| 23463 | 296342.65 | 6126064.26 |
| 23464 | 296326.15 | 6126064.23 |
| 23465 | 295836.64 | 6125857.16 |
| 23466 | 295855.62 | 6125728.68 |
| 23467 | 295789.17 | 6125716.41 |
| 23468 | 295852.04 | 6125725.41 |
| 23469 | 295836.42 | 6125859.15 |
| 23470 | 293867.29 | 6125246.95 |
| 23471 | 293999.45 | 6124725.95 |
| 23472 | 296531.62 | 6127384.32 |
| 23473 | 296197.67 | 6127959.16 |
| 23474 | 293808.80 | 6125375.09 |
| 23475 | 297018.23 | 6128217.24 |
| 23476 | 297024.35 | 6128271.90 |
| 23477 | 295940.83 | 6127910.78 |
| 23478 | 295974.78 | 6127912.66 |
| 23479 | 296075.95 | 6126290.75 |
| 23480 | 296057.98 | 6126289.02 |
| 23481 | 294311.92 | 6127765.27 |
| 23482 | 295714.72 | 6124939.15 |
| 23483 | 294716.05 | 6125126.79 |
| 23484 | 295530.29 | 6125238.07 |
| 23485 | 295529.81 | 6125209.71 |
| 23486 | 295783.35 | 6125377.46 |
| 23487 | 295750.68 | 6125372.77 |
| 23488 | 295871.47 | 6125182.47 |
| 23489 | 295396.06 | 6125513.97 |
| 23490 | 294681.84 | 6124862.25 |
| 23491 | 294713.37 | 6124952.45 |
| 23492 | 294640.81 | 6125046.98 |
| 23493 | 295940.69 | 6126471.70 |
| 23494 | 295711.74 | 6128412.10 |
| 23495 | 294863.19 | 6124847.87 |
| 23496 | 294897.96 | 6124946.31 |
| 23497 | 298355.06 | 6128066.99 |
| 23498 | 294386.07 | 6127611.74 |
| 23499 | 295728.19 | 6127456.06 |
| 23500 | 295728.76 | 6127463.31 |
| 23501 | 294374.97 | 6127469.52 |
| 23502 | 294386.51 | 6127740.72 |
| 23503 | 295419.91 | 6126212.39 |
| 23504 | 298316.74 | 6127939.22 |
| 23505 | 298385.39 | 6128047.61 |
| 23506 | 294729.60 | 6126074.48 |
| 23507 | 294806.82 | 6126125.27 |
| 23508 | 293940.01 | 6127161.24 |
| 23509 | 293925.17 | 6127121.99 |
| 23510 | 294621.02 | 6125152.70 |

|       |           |            |
|-------|-----------|------------|
| 23511 | 296579.09 | 6127756.04 |
| 23512 | 296583.53 | 6127803.83 |
| 23513 | 293978.92 | 6125731.35 |
| 23514 | 295796.17 | 6125282.72 |
| 23515 | 296523.75 | 6127760.23 |
| 23516 | 296505.60 | 6127820.07 |
| 23517 | 296518.32 | 6127919.21 |
| 23518 | 296571.75 | 6127915.45 |
| 23519 | 296442.74 | 6126334.25 |
| 23520 | 296430.06 | 6126390.71 |
| 23521 | 293304.17 | 6127251.56 |
| 23522 | 293184.16 | 6127325.56 |
| 23523 | 296068.26 | 6125282.27 |
| 23524 | 296073.08 | 6125397.16 |
| 23525 | 296522.84 | 6126716.11 |
| 23526 | 297280.17 | 6127661.88 |
| 23527 | 297285.62 | 6127699.34 |
| 23528 | 296707.56 | 6127513.89 |
| 23529 | 295766.20 | 6125866.81 |
| 23530 | 295762.13 | 6125901.58 |
| 23531 | 296789.16 | 6128245.24 |
| 23532 | 296781.47 | 6128175.67 |
| 23533 | 295445.58 | 6125520.89 |
| 23534 | 295441.04 | 6125550.54 |
| 23535 | 293914.80 | 6125749.78 |
| 23536 | 296187.24 | 6127867.18 |
| 23537 | 296407.29 | 6128046.19 |
| 23538 | 297056.99 | 6126316.06 |
| 23539 | 297038.26 | 6126378.70 |
| 23540 | 297062.36 | 6126389.29 |
| 23541 | 295883.87 | 6125449.18 |
| 23542 | 295883.49 | 6125441.34 |
| 23543 | 295881.96 | 6125473.68 |
| 23544 | 295896.51 | 6126454.15 |
| 23545 | 294466.93 | 6124883.51 |
| 23546 | 296421.40 | 6126439.52 |
| 23547 | 296465.89 | 6126627.72 |
| 23548 | 295834.54 | 6126934.20 |
| 23549 | 295896.33 | 6126929.08 |
| 23550 | 297353.96 | 6127078.95 |
| 23551 | 297344.45 | 6127078.17 |
| 23552 | 297345.71 | 6127212.97 |
| 23553 | 297267.76 | 6127210.56 |
| 23554 | 297273.39 | 6127137.07 |
| 23555 | 297239.86 | 6127669.41 |
| 23556 | 297245.40 | 6127708.86 |
| 23557 | 297268.75 | 6127661.99 |
| 23558 | 297279.88 | 6127659.91 |
| 23559 | 294952.92 | 6124713.20 |
| 23560 | 294962.33 | 6124709.82 |

|       |           |            |
|-------|-----------|------------|
| 23561 | 294963.00 | 6124711.71 |
| 23562 | 294546.09 | 6125387.61 |
| 23563 | 296227.49 | 6125458.40 |
| 23564 | 296052.47 | 6125713.21 |
| 23565 | 293846.79 | 6125527.20 |
| 23566 | 293847.76 | 6125528.95 |
| 23567 | 293861.89 | 6125647.69 |
| 23568 | 295133.73 | 6125276.60 |
| 23569 | 294387.70 | 6127648.95 |
| 23570 | 294388.02 | 6127657.06 |
| 23571 | 294948.49 | 6125686.83 |
| 23572 | 294953.95 | 6125638.14 |
| 23573 | 294967.47 | 6125499.05 |
| 23574 | 294988.73 | 6125642.02 |
| 23575 | 294911.47 | 6125765.14 |
| 23576 | 295317.68 | 6124966.71 |
| 23577 | 295319.58 | 6125064.83 |
| 23578 | 295435.47 | 6128269.20 |
| 23579 | 295429.66 | 6128228.07 |
| 23580 | 293820.68 | 6125668.12 |
| 23581 | 296241.72 | 6128083.67 |
| 23582 | 294972.37 | 6125457.91 |
| 23583 | 295310.10 | 6125369.89 |
| 23584 | 295295.61 | 6125368.03 |
| 23585 | 295332.78 | 6125211.79 |
| 23586 | 294691.41 | 6125756.90 |
| 23587 | 294695.68 | 6125720.27 |
| 23588 | 294933.58 | 6125384.34 |
| 23589 | 295247.14 | 6125926.73 |
| 23590 | 295220.22 | 6125447.61 |
| 23591 | 295207.60 | 6125922.24 |
| 23592 | 295997.25 | 6126788.97 |
| 23593 | 296000.63 | 6126789.24 |
| 23594 | 294581.09 | 6127186.51 |
| 23595 | 294941.98 | 6127851.17 |
| 23596 | 298580.16 | 6129016.23 |
| 23597 | 297157.32 | 6127685.27 |
| 23598 | 297161.85 | 6127725.61 |
| 23599 | 297198.57 | 6127677.36 |
| 23600 | 297202.96 | 6127714.62 |
| 23601 | 295825.24 | 6128275.72 |
| 23602 | 295986.86 | 6128658.03 |
| 23603 | 295948.89 | 6128659.52 |
| 23604 | 295946.75 | 6128624.59 |
| 23605 | 295931.01 | 6128595.06 |
| 23606 | 295981.07 | 6128288.29 |
| 23607 | 295950.33 | 6128292.91 |
| 23608 | 295472.58 | 6128461.48 |
| 23609 | 295600.39 | 6128454.60 |
| 23610 | 295474.31 | 6128497.44 |

|       |           |            |
|-------|-----------|------------|
| 23611 | 295602.14 | 6128491.09 |
| 23612 | 296664.58 | 6128363.21 |
| 23613 | 296662.17 | 6128345.37 |
| 23614 | 296666.97 | 6128381.05 |
| 23615 | 296677.45 | 6128391.31 |
| 23616 | 296725.00 | 6128380.21 |
| 23617 | 296720.25 | 6128350.94 |
| 23618 | 297110.72 | 6127011.96 |
| 23619 | 295496.54 | 6127647.35 |
| 23620 | 295372.79 | 6128147.68 |
| 23621 | 295416.50 | 6128142.37 |
| 23622 | 295361.25 | 6128150.75 |
| 23623 | 296088.31 | 6126545.34 |
| 23624 | 296089.11 | 6126537.65 |
| 23625 | 297455.04 | 6126982.91 |
| 23626 | 297512.06 | 6126972.27 |
| 23627 | 297619.03 | 6126844.12 |
| 23628 | 297648.54 | 6126795.86 |
| 23629 | 295741.93 | 6127042.80 |
| 23630 | 294163.61 | 6124593.16 |
| 23631 | 294187.12 | 6124656.96 |
| 23632 | 294062.02 | 6125010.64 |
| 23633 | 294128.91 | 6127103.52 |
| 23634 | 293953.48 | 6127124.03 |
| 23635 | 293694.18 | 6127137.25 |
| 23636 | 296997.32 | 6127494.33 |
| 23637 | 295697.26 | 6128412.74 |
| 23638 | 295468.46 | 6128266.81 |
| 23639 | 298995.32 | 6128120.50 |
| 23640 | 295228.03 | 6126178.03 |
| 23641 | 295811.37 | 6125869.95 |
| 23642 | 295766.43 | 6125864.83 |
| 23643 | 294117.95 | 6125705.69 |
| 23644 | 295403.69 | 6126311.78 |
| 23645 | 294445.90 | 6126622.37 |
| 23646 | 295283.31 | 6128515.97 |
| 23647 | 294458.75 | 6126992.68 |
| 23648 | 294762.53 | 6125820.04 |
| 23649 | 296156.25 | 6128093.08 |
| 23650 | 295154.77 | 6125122.04 |
| 23651 | 295159.84 | 6125083.77 |
| 23652 | 295161.89 | 6125022.46 |
| 23653 | 296578.51 | 6128394.63 |
| 23654 | 296573.34 | 6128354.53 |
| 23655 | 296753.39 | 6128251.72 |
| 23656 | 296787.17 | 6128247.53 |
| 23657 | 295482.35 | 6128133.08 |
| 23658 | 295491.60 | 6128198.38 |
| 23659 | 295662.96 | 6125414.32 |
| 23660 | 295688.43 | 6125184.68 |

|       |           |            |
|-------|-----------|------------|
| 23661 | 293932.22 | 6126950.84 |
| 23662 | 293934.50 | 6126971.72 |
| 23663 | 295740.12 | 6128653.57 |
| 23664 | 295799.67 | 6128650.94 |
| 23665 | 295845.63 | 6128599.97 |
| 23666 | 295930.87 | 6128593.06 |
| 23667 | 295927.51 | 6128546.86 |
| 23668 | 296417.37 | 6126460.05 |
| 23669 | 294449.41 | 6124834.20 |
| 23670 | 294773.56 | 6124775.87 |
| 23671 | 294868.13 | 6124743.36 |
| 23672 | 294784.89 | 6124720.27 |
| 23673 | 294849.08 | 6124697.79 |
| 23674 | 296559.18 | 6128025.52 |
| 23675 | 296557.44 | 6128188.76 |
| 23676 | 296586.22 | 6128183.26 |
| 23677 | 295739.98 | 6128651.58 |
| 23678 | 295736.82 | 6128605.86 |
| 23679 | 296725.38 | 6128382.17 |
| 23680 | 296728.81 | 6128399.84 |
| 23681 | 296717.91 | 6128335.11 |
| 23682 | 296724.68 | 6128378.23 |
| 23683 | 296677.90 | 6128393.26 |
| 23684 | 296681.47 | 6128408.86 |
| 23685 | 295529.46 | 6125190.71 |
| 23686 | 295654.86 | 6125186.39 |
| 23687 | 295604.14 | 6128490.99 |
| 23688 | 295606.54 | 6128528.96 |
| 23689 | 295647.47 | 6128526.28 |
| 23690 | 295645.52 | 6128480.20 |
| 23691 | 296506.04 | 6128443.49 |
| 23692 | 296496.46 | 6128412.54 |
| 23693 | 296490.17 | 6128366.97 |
| 23694 | 295747.24 | 6128411.86 |
| 23695 | 295828.84 | 6128308.15 |
| 23696 | 293174.46 | 6127326.65 |
| 23697 | 294529.73 | 6126383.83 |
| 23698 | 294530.39 | 6126386.34 |
| 23699 | 294446.11 | 6125112.62 |
| 23700 | 294840.09 | 6125148.63 |
| 23701 | 294613.69 | 6127162.48 |
| 23702 | 294430.05 | 6127665.49 |
| 23703 | 298854.85 | 6127804.73 |
| 23704 | 297375.78 | 6126926.26 |
| 23705 | 297135.13 | 6127761.65 |
| 23706 | 297184.20 | 6127750.20 |
| 23707 | 297284.19 | 6127073.26 |
| 23708 | 295760.90 | 6127374.84 |
| 23709 | 295765.13 | 6127417.27 |
| 23710 | 295795.84 | 6127372.06 |

|       |           |            |
|-------|-----------|------------|
| 23711 | 295800.83 | 6127416.81 |
| 23712 | 295247.76 | 6125067.87 |
| 23713 | 295148.64 | 6125180.37 |
| 23714 | 294128.30 | 6125274.19 |
| 23715 | 294192.09 | 6125250.59 |
| 23716 | 296088.10 | 6126547.33 |
| 23717 | 295696.08 | 6128653.90 |
| 23718 | 295653.11 | 6128656.82 |
| 23719 | 295647.64 | 6128530.27 |
| 23720 | 295653.19 | 6128658.82 |
| 23721 | 295887.78 | 6128568.89 |
| 23722 | 295841.72 | 6128520.17 |
| 23723 | 295844.67 | 6128577.09 |
| 23724 | 295335.36 | 6125920.97 |
| 23725 | 295333.54 | 6125937.87 |
| 23726 | 295337.73 | 6125823.22 |
| 23727 | 294781.59 | 6127690.08 |
| 23728 | 294619.10 | 6127868.02 |
| 23729 | 294563.28 | 6127863.54 |
| 23730 | 297259.54 | 6126474.72 |
| 23731 | 297265.75 | 6126442.17 |
| 23732 | 297229.78 | 6126460.42 |
| 23733 | 297243.93 | 6126375.92 |
| 23734 | 297313.13 | 6126364.50 |
| 23735 | 298607.31 | 6127765.39 |
| 23736 | 294701.03 | 6125675.60 |
| 23737 | 298410.72 | 6129013.51 |
| 23738 | 296111.49 | 6127661.67 |
| 23739 | 296133.89 | 6127659.58 |
| 23740 | 296122.92 | 6127546.16 |
| 23741 | 296133.70 | 6127657.59 |
| 23742 | 296172.79 | 6127542.55 |
| 23743 | 296183.67 | 6127654.57 |
| 23744 | 296209.32 | 6127234.99 |
| 23745 | 296206.95 | 6127222.20 |
| 23746 | 296221.59 | 6127220.09 |
| 23747 | 296361.79 | 6127786.96 |
| 23748 | 296370.97 | 6127785.71 |
| 23749 | 296807.42 | 6126284.11 |
| 23750 | 293701.47 | 6125157.17 |
| 23751 | 293674.85 | 6125107.90 |
| 23752 | 293767.23 | 6125397.28 |
| 23753 | 295392.61 | 6125256.65 |
| 23754 | 295531.09 | 6125398.96 |
| 23755 | 295597.50 | 6125407.84 |
| 23756 | 295543.81 | 6125148.43 |
| 23757 | 295610.73 | 6125145.34 |
| 23758 | 295824.88 | 6128308.65 |
| 23759 | 294537.70 | 6125532.76 |
| 23760 | 297107.88 | 6127739.12 |



|       |           |            |
|-------|-----------|------------|
| 23761 | 295945.42 | 6128457.39 |
| 23762 | 295357.58 | 6127965.96 |
| 23763 | 295401.55 | 6127926.62 |
| 23764 | 295370.38 | 6128145.97 |
| 23765 | 295947.29 | 6128025.46 |
| 23766 | 295881.76 | 6128386.90 |
| 23767 | 295851.70 | 6128444.23 |
| 23768 | 295839.29 | 6128470.24 |
| 23769 | 295361.56 | 6128466.34 |
| 23770 | 295432.52 | 6128507.84 |
| 23771 | 295406.51 | 6128366.80 |
| 23772 | 295837.93 | 6127010.16 |
| 23773 | 296753.69 | 6128253.70 |
| 23774 | 296763.71 | 6128311.16 |
| 23775 | 295416.22 | 6128140.39 |
| 23776 | 295410.29 | 6128098.56 |
| 23777 | 295750.85 | 6127747.41 |
| 23778 | 296643.57 | 6128013.01 |
| 23779 | 295835.88 | 6126982.24 |
| 23780 | 295742.62 | 6126932.52 |
| 23781 | 295835.93 | 6127010.28 |
| 23782 | 295885.05 | 6127024.13 |
| 23783 | 296154.29 | 6127003.99 |
| 23784 | 295970.99 | 6127016.64 |
| 23785 | 295974.19 | 6126992.75 |
| 23786 | 295975.25 | 6126984.82 |
| 23787 | 294620.16 | 6125711.76 |
| 23788 | 293170.04 | 6127418.61 |
| 23789 | 294442.24 | 6125098.47 |
| 23790 | 294542.96 | 6125079.08 |
| 23791 | 296443.65 | 6126330.22 |
| 23792 | 295237.86 | 6125070.59 |
| 23793 | 295811.12 | 6125871.93 |
| 23794 | 295806.97 | 6125903.66 |
| 23795 | 295779.78 | 6125715.06 |
| 23796 | 293923.01 | 6125760.38 |
| 23797 | 294084.85 | 6125853.58 |
| 23798 | 294113.70 | 6125799.61 |
| 23799 | 294063.74 | 6126417.51 |
| 23800 | 294514.98 | 6126327.42 |
| 23801 | 294509.02 | 6126310.77 |
| 23802 | 294531.38 | 6126390.21 |
| 23803 | 294556.56 | 6126490.52 |
| 23804 | 294783.98 | 6126085.40 |
| 23805 | 297788.35 | 6127321.97 |
| 23806 | 294816.56 | 6125371.47 |
| 23807 | 295532.87 | 6126343.69 |
| 23808 | 295529.49 | 6126343.18 |
| 23809 | 295530.50 | 6126334.94 |
| 23810 | 295380.62 | 6127484.37 |

|       |           |            |
|-------|-----------|------------|
| 23811 | 295634.90 | 6127869.69 |
| 23812 | 296655.98 | 6128263.40 |
| 23813 | 296647.64 | 6128211.70 |
| 23814 | 296494.53 | 6128286.53 |
| 23815 | 296484.50 | 6128234.23 |
| 23816 | 296387.07 | 6128239.91 |
| 23817 | 296011.79 | 6128212.85 |
| 23818 | 295887.85 | 6126391.37 |
| 23819 | 295839.74 | 6128154.51 |
| 23820 | 295824.67 | 6128237.66 |
| 23821 | 296009.80 | 6128213.11 |
| 23822 | 295398.23 | 6128548.38 |
| 23823 | 296002.26 | 6125593.79 |
| 23824 | 296015.75 | 6126537.58 |
| 23825 | 296037.08 | 6126405.10 |
| 23826 | 295452.37 | 6125466.27 |
| 23827 | 296903.21 | 6127383.30 |
| 23828 | 294252.32 | 6124740.56 |
| 23829 | 294193.96 | 6124583.03 |
| 23830 | 294217.47 | 6124646.83 |
| 23831 | 295032.85 | 6124898.02 |
| 23832 | 296688.27 | 6127526.81 |
| 23833 | 296714.94 | 6127532.70 |
| 23834 | 296787.42 | 6128249.51 |
| 23835 | 296794.16 | 6128301.07 |
| 23836 | 294084.49 | 6125070.56 |
| 23837 | 293703.49 | 6127093.91 |
| 23838 | 293710.30 | 6127062.17 |
| 23839 | 296507.45 | 6126151.20 |
| 23840 | 296419.45 | 6128208.34 |
| 23841 | 295614.51 | 6126607.90 |
| 23842 | 294774.14 | 6127568.93 |
| 23843 | 295855.08 | 6128599.54 |
| 23844 | 295887.08 | 6128597.74 |
| 23845 | 295889.18 | 6128599.63 |
| 23846 | 295892.13 | 6128659.31 |
| 23847 | 295889.08 | 6128597.63 |
| 23848 | 295600.86 | 6128419.03 |
| 23849 | 295708.66 | 6128354.24 |
| 23850 | 295711.63 | 6128410.10 |
| 23851 | 295713.69 | 6128449.67 |
| 23852 | 295711.84 | 6128414.10 |
| 23853 | 296554.21 | 6125996.10 |
| 23854 | 295195.11 | 6128283.71 |
| 23855 | 295186.57 | 6128206.04 |
| 23856 | 295150.63 | 6128206.42 |
| 23857 | 295522.75 | 6128535.05 |
| 23858 | 295525.80 | 6128607.59 |
| 23859 | 294768.08 | 6124671.06 |
| 23860 | 294919.62 | 6124382.36 |

|       |           |            |
|-------|-----------|------------|
| 23861 | 294903.62 | 6124498.89 |
| 23862 | 295196.85 | 6125929.14 |
| 23863 | 294690.48 | 6125764.97 |
| 23864 | 294665.89 | 6125924.04 |
| 23865 | 294654.77 | 6125871.66 |
| 23866 | 294471.89 | 6126005.58 |
| 23867 | 294579.44 | 6126072.27 |
| 23868 | 296594.74 | 6126546.83 |
| 23869 | 293963.50 | 6126835.96 |
| 23870 | 293988.69 | 6126832.79 |
| 23871 | 293992.23 | 6126866.61 |
| 23872 | 295012.04 | 6126304.03 |
| 23873 | 295014.45 | 6126281.02 |
| 23874 | 295010.05 | 6126303.83 |
| 23875 | 294998.12 | 6126302.62 |
| 23876 | 295014.86 | 6126277.04 |
| 23877 | 295015.48 | 6126271.07 |
| 23878 | 297804.15 | 6127029.92 |
| 23879 | 297841.97 | 6126951.45 |
| 23880 | 298760.82 | 6128094.91 |
| 23881 | 298773.48 | 6127967.69 |
| 23882 | 298773.95 | 6127969.64 |
| 23883 | 294862.27 | 6127203.96 |
| 23884 | 294777.59 | 6127069.25 |
| 23885 | 294579.26 | 6127188.67 |
| 23886 | 294580.02 | 6127197.69 |
| 23887 | 294775.34 | 6127382.28 |
| 23888 | 294650.91 | 6127389.16 |
| 23889 | 294651.06 | 6127452.92 |
| 23890 | 294720.27 | 6127153.32 |
| 23891 | 295298.53 | 6125325.53 |
| 23892 | 294808.08 | 6127264.94 |
| 23893 | 294684.94 | 6127453.83 |
| 23894 | 294749.92 | 6127452.12 |
| 23895 | 293760.46 | 6127851.16 |
| 23896 | 295774.79 | 6125433.38 |
| 23897 | 295425.91 | 6128209.27 |
| 23898 | 296665.59 | 6127485.84 |
| 23899 | 296666.35 | 6127492.00 |
| 23900 | 296682.47 | 6127492.19 |
| 23901 | 296684.84 | 6127508.00 |
| 23902 | 294854.61 | 6124706.44 |
| 23903 | 294850.97 | 6124697.13 |
| 23904 | 295528.31 | 6126352.30 |
| 23905 | 296863.70 | 6128238.81 |
| 23906 | 296870.44 | 6128290.37 |
| 23907 | 296693.63 | 6128205.33 |
| 23908 | 295953.82 | 6125536.89 |
| 23909 | 296009.12 | 6125544.90 |
| 23910 | 296016.43 | 6125154.89 |

|       |           |            |
|-------|-----------|------------|
| 23911 | 295877.86 | 6125291.03 |
| 23912 | 294900.25 | 6124952.76 |
| 23913 | 298193.08 | 6128967.13 |
| 23914 | 298235.08 | 6128959.19 |
| 23915 | 294731.26 | 6126073.83 |
| 23916 | 295228.29 | 6126176.04 |
| 23917 | 294520.26 | 6126004.50 |
| 23918 | 296319.72 | 6127852.62 |
| 23919 | 296832.88 | 6127470.07 |
| 23920 | 295307.44 | 6126193.29 |
| 23921 | 295422.89 | 6124948.72 |
| 23922 | 295422.86 | 6124946.72 |
| 23923 | 296997.52 | 6127495.11 |
| 23924 | 296678.23 | 6127520.08 |
| 23925 | 296715.37 | 6127530.61 |
| 23926 | 296685.14 | 6127509.98 |
| 23927 | 295845.72 | 6128601.96 |
| 23928 | 294665.29 | 6124969.82 |
| 23929 | 296628.55 | 6126655.62 |
| 23930 | 296636.86 | 6126615.12 |
| 23931 | 296557.69 | 6126652.88 |
| 23932 | 296567.30 | 6126607.33 |
| 23933 | 296634.88 | 6126614.90 |
| 23934 | 296731.91 | 6126600.75 |
| 23935 | 296851.91 | 6126627.37 |
| 23936 | 296705.42 | 6126678.80 |
| 23937 | 294640.70 | 6125760.32 |
| 23938 | 294656.21 | 6125808.17 |
| 23939 | 295744.24 | 6124937.98 |
| 23940 | 295744.23 | 6124916.80 |
| 23941 | 295713.91 | 6124920.85 |
| 23942 | 296149.00 | 6125484.46 |
| 23943 | 296158.08 | 6125406.09 |
| 23944 | 296151.29 | 6125177.42 |
| 23945 | 295995.93 | 6124939.15 |
| 23946 | 296416.99 | 6126462.02 |
| 23947 | 293952.97 | 6126840.17 |
| 23948 | 293956.97 | 6126873.94 |
| 23949 | 297593.41 | 6126703.14 |
| 23950 | 293654.27 | 6126521.15 |
| 23951 | 296886.27 | 6128133.50 |
| 23952 | 294637.74 | 6127027.08 |
| 23953 | 294780.35 | 6127037.46 |
| 23954 | 294795.65 | 6126891.24 |
| 23955 | 294998.92 | 6125285.86 |
| 23956 | 294773.50 | 6125422.95 |
| 23957 | 294759.82 | 6127451.39 |
| 23958 | 294774.91 | 6127451.18 |
| 23959 | 294505.20 | 6126663.96 |
| 23960 | 294502.48 | 6126647.16 |

|       |           |            |
|-------|-----------|------------|
| 23961 | 294504.00 | 6126604.15 |
| 23962 | 295161.88 | 6124886.47 |
| 23963 | 295161.99 | 6124922.47 |
| 23964 | 294846.24 | 6127520.47 |
| 23965 | 294846.12 | 6127476.49 |
| 23966 | 296656.30 | 6128265.37 |
| 23967 | 295565.83 | 6128603.65 |
| 23968 | 297072.56 | 6126596.06 |
| 23969 | 297100.99 | 6126447.81 |
| 23970 | 296965.31 | 6126276.15 |
| 23971 | 296940.00 | 6126334.60 |
| 23972 | 296908.94 | 6126504.89 |
| 23973 | 296891.13 | 6126437.38 |
| 23974 | 296931.43 | 6126396.13 |
| 23975 | 296944.07 | 6126399.43 |
| 23976 | 296905.37 | 6126389.32 |
| 23977 | 296937.11 | 6126362.49 |
| 23978 | 296940.75 | 6126332.75 |
| 23979 | 295459.03 | 6128203.37 |
| 23980 | 295318.34 | 6127832.58 |
| 23981 | 294759.81 | 6127471.41 |
| 23982 | 295501.07 | 6128262.19 |
| 23983 | 294823.81 | 6127440.94 |
| 23984 | 294760.64 | 6127688.67 |
| 23985 | 294763.80 | 6127743.90 |
| 23986 | 294459.01 | 6124676.39 |
| 23987 | 294548.43 | 6124798.50 |
| 23988 | 295068.69 | 6127881.99 |
| 23989 | 293530.71 | 6126843.95 |
| 23990 | 293543.30 | 6126800.87 |
| 23991 | 293530.15 | 6126845.88 |
| 23992 | 295107.23 | 6125085.01 |
| 23993 | 295315.73 | 6124821.19 |
| 23994 | 294694.77 | 6127029.03 |
| 23995 | 293778.63 | 6126502.40 |
| 23996 | 294563.29 | 6126554.57 |
| 23997 | 296045.88 | 6125154.35 |
| 23998 | 297268.84 | 6128312.56 |
| 23999 | 296317.04 | 6125309.41 |
| 24000 | 296461.81 | 6125433.90 |
| 24001 | 296210.74 | 6124958.22 |
| 24002 | 296223.07 | 6124873.52 |
| 24003 | 296213.38 | 6125260.85 |
| 24004 | 298486.05 | 6127783.00 |
| 24005 | 298449.10 | 6127792.05 |
| 24006 | 296517.29 | 6126474.36 |
| 24007 | 296561.61 | 6127914.70 |
| 24008 | 297021.96 | 6127705.59 |
| 24009 | 297062.43 | 6127698.37 |
| 24010 | 295804.47 | 6127860.58 |

|       |           |            |
|-------|-----------|------------|
| 24011 | 295794.82 | 6127742.94 |
| 24012 | 295847.27 | 6127862.26 |
| 24013 | 295836.56 | 6127739.66 |
| 24014 | 294379.37 | 6125406.93 |
| 24015 | 294424.08 | 6125424.88 |
| 24016 | 294455.73 | 6125413.45 |
| 24017 | 295848.57 | 6128663.52 |
| 24018 | 295767.44 | 6127973.97 |
| 24019 | 296664.78 | 6127814.40 |
| 24020 | 296801.68 | 6127474.50 |
| 24021 | 296772.04 | 6127516.25 |
| 24022 | 296453.03 | 6128298.97 |
| 24023 | 293922.90 | 6127018.27 |
| 24024 | 295604.38 | 6128454.40 |
| 24025 | 295711.69 | 6128449.75 |
| 24026 | 296789.38 | 6128247.23 |
| 24027 | 294315.15 | 6127508.62 |
| 24028 | 294317.26 | 6127583.48 |
| 24029 | 298914.01 | 6127934.34 |
| 24030 | 299020.74 | 6128071.68 |
| 24031 | 298969.27 | 6127968.51 |
| 24032 | 298964.55 | 6128130.03 |
| 24033 | 294931.50 | 6126677.19 |
| 24034 | 294929.51 | 6126677.00 |
| 24035 | 294641.73 | 6126540.20 |
| 24036 | 297155.09 | 6127466.12 |
| 24037 | 297179.56 | 6127023.37 |
| 24038 | 297174.98 | 6127122.38 |
| 24039 | 295147.64 | 6128177.66 |
| 24040 | 296653.28 | 6128986.32 |
| 24041 | 296687.11 | 6128980.71 |
| 24042 | 297307.26 | 6128274.13 |
| 24043 | 297258.59 | 6128285.53 |
| 24044 | 297258.07 | 6128283.60 |
| 24045 | 297869.37 | 6127183.36 |
| 24046 | 298893.87 | 6128980.05 |
| 24047 | 298412.22 | 6129168.73 |
| 24048 | 295284.09 | 6128532.23 |
| 24049 | 296992.77 | 6128009.47 |
| 24050 | 297269.38 | 6128314.49 |
| 24051 | 297190.91 | 6128330.70 |
| 24052 | 296698.72 | 6127638.69 |
| 24053 | 294821.82 | 6127441.11 |
| 24054 | 294819.83 | 6127441.28 |
| 24055 | 294792.27 | 6127081.39 |
| 24056 | 294794.27 | 6127081.45 |
| 24057 | 294924.20 | 6125990.55 |
| 24058 | 295318.91 | 6125089.65 |
| 24059 | 294476.30 | 6127672.21 |
| 24060 | 294561.28 | 6127863.38 |

|       |           |            |
|-------|-----------|------------|
| 24061 | 294177.03 | 6125202.85 |
| 24062 | 294755.51 | 6126797.14 |
| 24063 | 295887.47 | 6127232.35 |
| 24064 | 296519.52 | 6127402.18 |
| 24065 | 296889.66 | 6126322.94 |
| 24066 | 293455.31 | 6127252.62 |
| 24067 | 294466.20 | 6124881.65 |
| 24068 | 296997.67 | 6127495.77 |
| 24069 | 295281.79 | 6126433.50 |
| 24070 | 296704.59 | 6128006.52 |
| 24071 | 295656.86 | 6125186.32 |
| 24072 | 294139.11 | 6127483.50 |
| 24073 | 294295.45 | 6124732.19 |
| 24074 | 294253.01 | 6124742.44 |
| 24075 | 295571.56 | 6126891.05 |
| 24076 | 296227.21 | 6125458.38 |
| 24077 | 296609.51 | 6126745.78 |
| 24078 | 295874.00 | 6125291.85 |
| 24079 | 294362.97 | 6127159.14 |
| 24080 | 294362.83 | 6127157.14 |
| 24081 | 294363.11 | 6127161.13 |
| 24082 | 294404.28 | 6125123.69 |
| 24083 | 294762.11 | 6128046.16 |
| 24084 | 294763.91 | 6127745.90 |
| 24085 | 294776.88 | 6127445.13 |
| 24086 | 294773.35 | 6127382.36 |
| 24087 | 294759.51 | 6127630.91 |
| 24088 | 293559.19 | 6126866.12 |
| 24089 | 293559.44 | 6126868.11 |
| 24090 | 295138.33 | 6127256.49 |
| 24091 | 295338.48 | 6125652.67 |
| 24092 | 295202.04 | 6125927.36 |
| 24093 | 295200.14 | 6125928.01 |
| 24094 | 294687.56 | 6125029.13 |
| 24095 | 295672.81 | 6127369.69 |
| 24096 | 296239.97 | 6125068.20 |
| 24097 | 296241.90 | 6125068.69 |
| 24098 | 296238.03 | 6125067.71 |
| 24099 | 295975.03 | 6127914.64 |
| 24100 | 295940.73 | 6127912.78 |
| 24101 | 295896.85 | 6127910.41 |
| 24102 | 294483.22 | 6126522.77 |
| 24103 | 294563.33 | 6126001.75 |
| 24104 | 294655.85 | 6125992.23 |
| 24105 | 294530.90 | 6126388.27 |
| 24106 | 294557.05 | 6126492.46 |
| 24107 | 295408.50 | 6128366.68 |
| 24108 | 295935.87 | 6127356.62 |
| 24109 | 296736.45 | 6126502.31 |
| 24110 | 296779.31 | 6126277.38 |

|       |           |            |
|-------|-----------|------------|
| 24111 | 296778.91 | 6126279.34 |
| 24112 | 295862.72 | 6127908.58 |
| 24113 | 293303.75 | 6127206.41 |
| 24114 | 295659.30 | 6125262.53 |
| 24115 | 295373.59 | 6125657.03 |
| 24116 | 295769.44 | 6127973.80 |
| 24117 | 295891.93 | 6127120.92 |
| 24118 | 295688.46 | 6126114.17 |
| 24119 | 295692.42 | 6126114.75 |
| 24120 | 294760.12 | 6128046.35 |
| 24121 | 294751.48 | 6128143.11 |
| 24122 | 294746.14 | 6128187.85 |
| 24123 | 294758.64 | 6127688.77 |
| 24124 | 294783.63 | 6127797.65 |
| 24125 | 294927.66 | 6128033.11 |
| 24126 | 294703.30 | 6127154.90 |
| 24127 | 294809.23 | 6127284.94 |
| 24128 | 294809.07 | 6127282.95 |
| 24129 | 294810.07 | 6127264.83 |
| 24130 | 294759.55 | 6127632.91 |
| 24131 | 294779.00 | 6127637.46 |
| 24132 | 294515.45 | 6127760.18 |
| 24133 | 296207.20 | 6128485.51 |
| 24134 | 295952.23 | 6127226.01 |
| 24135 | 294546.55 | 6124799.18 |
| 24136 | 295178.47 | 6125265.25 |
| 24137 | 295182.45 | 6128526.13 |
| 24138 | 294366.14 | 6125137.66 |
| 24139 | 293810.85 | 6125560.32 |
| 24140 | 296990.60 | 6127485.46 |
| 24141 | 295394.61 | 6125256.57 |
| 24142 | 295475.54 | 6125813.40 |
| 24143 | 295475.00 | 6125817.36 |
| 24144 | 295492.17 | 6125675.41 |
| 24145 | 295490.19 | 6125675.14 |
| 24146 | 295491.94 | 6125677.40 |
| 24147 | 295967.90 | 6127064.74 |
| 24148 | 295990.96 | 6128057.60 |
| 24149 | 295987.87 | 6127993.23 |
| 24150 | 295984.08 | 6127992.82 |
| 24151 | 295925.28 | 6127228.60 |
| 24152 | 296015.31 | 6126658.47 |
| 24153 | 293988.42 | 6125177.98 |
| 24154 | 294099.99 | 6125230.99 |
| 24155 | 294868.81 | 6124745.24 |
| 24156 | 294909.11 | 6126993.55 |
| 24157 | 294934.72 | 6126685.60 |
| 24158 | 294934.60 | 6126687.59 |
| 24159 | 293996.70 | 6125273.17 |
| 24160 | 293688.48 | 6125095.69 |



|       |           |            |
|-------|-----------|------------|
| 24161 | 293702.44 | 6125158.91 |
| 24162 | 295422.99 | 6124950.72 |
| 24163 | 294089.57 | 6125236.92 |
| 24164 | 293914.81 | 6127321.12 |
| 24165 | 295271.25 | 6128282.80 |
| 24166 | 294526.06 | 6125330.16 |
| 24167 | 295753.08 | 6127224.79 |
| 24168 | 295455.66 | 6125953.83 |
| 24169 | 295817.79 | 6126060.51 |
| 24170 | 295640.88 | 6125535.76 |
| 24171 | 295636.96 | 6125534.99 |
| 24172 | 295424.10 | 6125663.81 |
| 24173 | 295425.03 | 6124993.67 |
| 24174 | 296015.76 | 6126654.49 |
| 24175 | 298737.05 | 6127829.28 |
| 24176 | 294772.15 | 6127569.00 |
| 24177 | 298727.88 | 6128988.31 |
| 24178 | 298738.60 | 6128986.29 |
| 24179 | 295668.74 | 6127866.30 |
| 24180 | 295996.91 | 6125745.18 |
| 24181 | 295614.74 | 6126605.91 |
| 24182 | 294545.49 | 6127079.25 |
| 24183 | 294545.69 | 6127081.24 |
| 24184 | 294704.70 | 6127129.44 |
| 24185 | 294768.05 | 6127149.07 |
| 24186 | 295048.55 | 6126542.98 |
| 24187 | 295156.52 | 6126297.16 |
| 24188 | 295158.51 | 6126297.39 |
| 24189 | 295154.54 | 6126296.91 |
| 24190 | 295282.87 | 6126444.79 |
| 24191 | 294925.66 | 6128033.27 |
| 24192 | 294934.61 | 6128133.57 |
| 24193 | 294675.99 | 6124663.57 |
| 24194 | 294852.85 | 6124696.47 |
| 24195 | 294867.44 | 6124741.48 |
| 24196 | 295527.58 | 6128256.41 |
| 24197 | 297227.23 | 6126466.84 |
| 24198 | 294813.92 | 6126704.20 |
| 24199 | 294818.54 | 6126662.89 |
| 24200 | 294816.55 | 6126662.69 |
| 24201 | 294388.10 | 6127659.05 |
| 24202 | 294060.14 | 6125011.34 |
| 24203 | 296015.99 | 6125485.66 |
| 24204 | 295902.94 | 6125472.19 |
| 24205 | 296013.78 | 6125455.28 |
| 24206 | 296016.11 | 6125595.39 |
| 24207 | 296530.36 | 6128819.49 |
| 24208 | 296533.30 | 6127385.40 |
| 24209 | 296535.07 | 6127386.33 |
| 24210 | 295031.76 | 6124900.54 |

|       |           |            |
|-------|-----------|------------|
| 24211 | 295660.79 | 6125430.25 |
| 24212 | 295662.78 | 6125430.52 |
| 24213 | 296093.88 | 6128503.33 |
| 24214 | 293945.88 | 6127598.67 |
| 24215 | 293517.13 | 6127287.15 |
| 24216 | 293516.46 | 6127253.16 |
| 24217 | 295620.04 | 6125680.26 |
| 24218 | 295772.90 | 6125447.87 |
| 24219 | 295762.60 | 6125848.34 |
| 24220 | 295915.37 | 6125156.70 |
| 24221 | 295360.84 | 6128148.79 |
| 24222 | 295370.81 | 6128147.92 |
| 24223 | 295368.81 | 6128148.10 |
| 24224 | 295606.75 | 6128532.96 |
| 24225 | 294734.80 | 6125012.76 |
| 24226 | 294370.87 | 6127323.00 |
| 24227 | 293682.66 | 6127050.60 |
| 24228 | 294164.73 | 6126102.46 |
| 24229 | 296550.23 | 6125996.53 |
| 24230 | 296861.97 | 6126168.85 |
| 24231 | 296941.14 | 6126344.94 |
| 24232 | 297445.45 | 6127426.45 |
| 24233 | 297485.74 | 6127451.48 |
| 24234 | 296552.32 | 6126330.29 |
| 24235 | 296696.77 | 6126331.41 |
| 24236 | 297150.13 | 6127325.25 |
| 24237 | 296715.16 | 6127531.63 |
| 24238 | 298798.40 | 6127866.91 |
| 24239 | 298749.80 | 6127878.14 |
| 24240 | 296087.34 | 6126535.43 |
| 24241 | 296360.45 | 6126320.12 |
| 24242 | 298760.13 | 6128857.92 |
| 24243 | 297621.55 | 6126858.76 |
| 24244 | 297666.97 | 6127096.72 |
| 24245 | 294881.65 | 6125995.17 |
| 24246 | 295066.56 | 6127019.51 |
| 24247 | 297737.76 | 6127240.27 |
| 24248 | 297701.20 | 6127291.91 |
| 24249 | 297698.31 | 6127298.36 |
| 24250 | 295523.58 | 6127263.35 |
| 24251 | 295708.38 | 6125986.86 |
| 24252 | 295708.65 | 6125984.88 |
| 24253 | 296580.61 | 6127416.38 |
| 24254 | 298841.58 | 6127858.00 |
| 24255 | 293812.16 | 6126857.42 |
| 24256 | 295362.84 | 6128148.62 |
| 24257 | 297459.42 | 6127271.92 |
| 24258 | 297441.24 | 6126527.63 |
| 24259 | 294697.44 | 6126348.16 |
| 24260 | 294949.42 | 6125278.17 |

|       |           |            |
|-------|-----------|------------|
| 24261 | 296847.44 | 6127883.75 |
| 24262 | 296408.64 | 6126515.33 |
| 24263 | 296417.52 | 6126077.74 |
| 24264 | 296595.11 | 6128186.03 |
| 24265 | 295331.82 | 6127283.50 |
| 24266 | 293661.32 | 6127206.94 |
| 24267 | 293694.39 | 6127063.02 |
| 24268 | 294373.93 | 6127301.71 |
| 24269 | 294820.12 | 6126678.65 |
| 24270 | 295031.08 | 6125290.52 |
| 24271 | 294769.11 | 6125254.79 |
| 24272 | 294757.26 | 6125910.48 |
| 24273 | 294605.48 | 6127078.90 |
| 24274 | 295332.96 | 6125212.12 |
| 24275 | 293990.35 | 6125181.49 |
| 24276 | 298315.19 | 6127940.30 |
| 24277 | 298383.71 | 6128048.68 |
| 24278 | 296779.03 | 6126117.50 |
| 24279 | 295824.62 | 6127910.14 |
| 24280 | 295593.48 | 6128251.11 |
| 24281 | 294388.10 | 6127661.05 |
| 24282 | 294491.50 | 6127309.90 |
| 24283 | 294619.80 | 6127755.70 |
| 24284 | 294586.45 | 6127282.23 |
| 24285 | 294731.00 | 6125619.70 |
| 24286 | 294778.36 | 6127037.32 |
| 24287 | 294694.60 | 6127031.02 |
| 24288 | 294757.27 | 6126793.55 |
| 24289 | 295555.28 | 6127239.87 |
| 24290 | 295683.61 | 6127250.18 |
| 24291 | 293638.01 | 6125123.89 |
| 24292 | 294808.61 | 6125410.23 |
| 24293 | 294578.94 | 6124888.54 |
| 24294 | 294601.97 | 6124833.82 |
| 24295 | 294451.29 | 6124833.52 |
| 24296 | 294850.70 | 6125022.93 |
| 24297 | 294856.05 | 6125039.38 |
| 24298 | 297476.34 | 6127419.65 |
| 24299 | 297477.47 | 6127423.12 |
| 24300 | 296310.38 | 6125919.82 |
| 24301 | 296766.75 | 6126338.94 |
| 24302 | 294034.33 | 6125155.62 |
| 24303 | 293591.88 | 6126874.04 |
| 24304 | 293665.62 | 6126878.43 |
| 24305 | 294682.55 | 6127873.95 |
| 24306 | 294138.91 | 6127703.94 |
| 24307 | 295826.86 | 6128308.41 |
| 24308 | 295000.68 | 6125288.01 |
| 24309 | 295001.12 | 6125284.04 |
| 24310 | 294995.67 | 6125297.45 |

|       |           |            |
|-------|-----------|------------|
| 24311 | 294997.61 | 6125297.64 |
| 24312 | 294993.68 | 6125297.22 |
| 24313 | 294827.41 | 6125265.06 |
| 24314 | 294826.97 | 6125269.03 |
| 24315 | 294867.56 | 6125269.34 |
| 24316 | 295248.15 | 6125242.09 |
| 24317 | 295247.67 | 6125065.88 |
| 24318 | 295245.85 | 6124966.45 |
| 24319 | 295331.63 | 6125208.06 |
| 24320 | 297562.29 | 6127227.43 |
| 24321 | 295324.99 | 6125931.45 |
| 24322 | 297184.42 | 6127752.19 |
| 24323 | 297186.14 | 6127749.74 |
| 24324 | 295300.52 | 6125325.77 |
| 24325 | 295333.11 | 6125941.85 |
| 24326 | 296940.53 | 6127396.20 |
| 24327 | 296667.24 | 6128383.03 |
| 24328 | 297586.08 | 6127403.42 |
| 24329 | 297584.44 | 6127359.85 |
| 24330 | 294528.72 | 6126379.96 |
| 24331 | 294462.44 | 6126019.83 |
| 24332 | 294463.13 | 6126017.25 |
| 24333 | 293821.62 | 6125669.88 |
| 24334 | 294728.70 | 6128335.53 |
| 24335 | 297908.79 | 6127171.35 |
| 24336 | 297911.74 | 6127171.57 |
| 24337 | 296838.58 | 6126220.63 |
| 24338 | 296834.92 | 6126219.01 |
| 24339 | 295530.86 | 6125400.95 |
| 24340 | 295531.34 | 6125396.98 |
| 24341 | 294139.69 | 6127340.98 |
| 24342 | 294141.69 | 6127340.86 |
| 24343 | 293650.17 | 6127051.91 |
| 24344 | 293613.55 | 6127053.79 |
| 24345 | 293540.73 | 6127068.40 |
| 24346 | 293494.66 | 6126985.16 |
| 24347 | 293489.57 | 6127071.58 |
| 24348 | 294357.82 | 6127303.45 |
| 24349 | 294299.64 | 6126648.87 |
| 24350 | 294139.71 | 6127342.98 |
| 24351 | 296769.88 | 6128362.38 |
| 24352 | 296891.97 | 6128333.72 |
| 24353 | 296818.36 | 6128340.20 |
| 24354 | 293376.06 | 6126988.02 |
| 24355 | 293221.57 | 6127067.94 |
| 24356 | 293276.42 | 6126943.09 |
| 24357 | 293274.72 | 6126944.13 |
| 24358 | 293198.12 | 6126895.92 |
| 24359 | 293193.57 | 6126988.39 |
| 24360 | 293242.46 | 6127100.00 |

|       |           |            |
|-------|-----------|------------|
| 24361 | 293722.34 | 6125194.07 |
| 24362 | 293725.77 | 6125199.28 |
| 24363 | 293727.55 | 6125198.36 |
| 24364 | 293786.73 | 6125238.63 |
| 24365 | 293722.11 | 6124976.27 |
| 24366 | 295134.00 | 6125274.62 |
| 24367 | 297225.49 | 6126470.32 |
| 24368 | 294870.53 | 6126095.23 |
| 24369 | 295333.88 | 6125213.90 |
| 24370 | 295349.06 | 6125800.41 |
| 24371 | 294153.07 | 6127655.02 |
| 24372 | 295375.89 | 6124914.72 |
| 24373 | 294469.89 | 6126005.70 |
| 24374 | 294467.90 | 6126005.52 |
| 24375 | 294423.67 | 6125967.79 |
| 24376 | 294424.24 | 6125969.70 |
| 24377 | 294421.69 | 6125968.06 |
| 24378 | 294427.40 | 6124895.34 |
| 24379 | 296997.83 | 6127496.44 |
| 24380 | 295670.73 | 6125187.76 |
| 24381 | 296119.81 | 6126170.72 |
| 24382 | 296117.83 | 6126170.41 |
| 24383 | 296120.04 | 6126168.73 |
| 24384 | 294215.11 | 6127338.59 |
| 24385 | 294355.97 | 6127305.67 |
| 24386 | 295354.60 | 6124914.70 |
| 24387 | 293542.53 | 6127066.29 |
| 24388 | 295393.19 | 6127395.38 |
| 24389 | 294214.67 | 6125189.34 |
| 24390 | 295662.69 | 6125416.30 |
| 24391 | 296605.97 | 6128270.66 |
| 24392 | 296553.30 | 6128278.06 |
| 24393 | 296894.34 | 6126099.38 |
| 24394 | 294162.04 | 6127950.27 |
| 24395 | 294159.69 | 6127920.88 |
| 24396 | 294186.93 | 6127918.63 |
| 24397 | 294169.63 | 6127957.98 |
| 24398 | 297381.68 | 6127851.96 |
| 24399 | 297453.33 | 6127861.66 |
| 24400 | 297388.98 | 6127917.68 |
| 24401 | 297463.19 | 6127863.85 |
| 24402 | 297420.91 | 6127914.07 |
| 24403 | 297417.89 | 6127888.36 |
| 24404 | 297429.93 | 6127913.05 |
| 24405 | 294144.81 | 6127841.51 |
| 24406 | 294153.02 | 6127840.83 |
| 24407 | 294131.10 | 6127773.81 |
| 24408 | 294009.43 | 6127783.95 |
| 24409 | 294139.17 | 6127773.14 |
| 24410 | 294176.00 | 6127770.07 |

|       |           |            |
|-------|-----------|------------|
| 24411 | 294141.91 | 6127806.31 |
| 24412 | 294190.83 | 6127837.71 |
| 24413 | 296999.42 | 6128035.52 |
| 24414 | 297078.05 | 6128027.18 |
| 24415 | 294156.57 | 6127882.97 |
| 24416 | 297390.02 | 6127927.05 |
| 24417 | 294077.40 | 6127847.06 |
| 24418 | 294050.89 | 6127820.04 |
| 24419 | 294039.01 | 6127807.92 |
| 24420 | 296885.78 | 6128057.82 |
| 24421 | 296888.07 | 6128079.45 |
| 24422 | 294178.55 | 6127803.27 |
| 24423 | 294184.11 | 6127880.72 |
| 24424 | 294185.31 | 6127956.68 |
| 24425 | 294240.80 | 6126338.43 |
| 24426 | 294241.77 | 6126338.18 |
| 24427 | 294008.92 | 6127858.20 |
| 24428 | 293986.00 | 6127881.10 |
| 24429 | 293956.08 | 6127859.01 |
| 24430 | 293949.75 | 6127940.90 |
| 24431 | 293963.62 | 6127956.20 |
| 24432 | 293834.76 | 6128027.73 |
| 24433 | 293884.74 | 6127978.44 |
| 24434 | 293809.83 | 6127991.56 |
| 24435 | 293853.70 | 6128061.82 |
| 24436 | 293718.11 | 6127998.30 |
| 24437 | 293659.61 | 6127905.20 |
| 24438 | 293758.99 | 6127985.60 |
| 24439 | 293753.17 | 6127976.00 |
| 24440 | 293760.29 | 6127987.07 |
| 24441 | 293804.87 | 6128129.03 |
| 24442 | 293787.14 | 6128099.86 |
| 24443 | 293927.61 | 6128065.38 |
| 24444 | 293712.75 | 6128001.71 |
| 24445 | 293683.27 | 6127864.72 |
| 24446 | 293623.39 | 6127768.87 |
| 24447 | 293818.94 | 6128078.60 |
| 24448 | 293798.49 | 6128046.60 |
| 24449 | 293855.76 | 6127948.84 |
| 24450 | 293953.74 | 6127985.03 |
| 24451 | 293979.17 | 6128012.56 |
| 24452 | 294007.86 | 6127984.70 |
| 24453 | 293980.98 | 6128010.82 |
| 24454 | 293550.45 | 6128105.07 |
| 24455 | 293550.96 | 6128105.94 |
| 24456 | 293572.94 | 6128090.83 |
| 24457 | 293537.37 | 6128113.36 |
| 24458 | 293551.79 | 6128105.39 |
| 24459 | 293397.08 | 6127992.47 |
| 24460 | 293418.18 | 6127979.06 |

|       |           |            |
|-------|-----------|------------|
| 24461 | 296361.74 | 6125829.78 |
| 24462 | 293970.98 | 6126528.90 |
| 24463 | 293931.77 | 6126542.56 |
| 24464 | 293956.02 | 6126701.35 |
| 24465 | 293996.62 | 6126520.98 |
| 24466 | 293925.60 | 6126702.25 |
| 24467 | 293977.55 | 6126699.42 |
| 24468 | 294818.06 | 6128492.07 |
| 24469 | 294776.28 | 6128495.37 |
| 24470 | 294781.44 | 6128562.01 |
| 24471 | 294740.98 | 6128498.15 |
| 24472 | 294767.28 | 6128414.75 |
| 24473 | 294734.90 | 6128418.55 |
| 24474 | 294098.63 | 6127226.45 |
| 24475 | 294087.99 | 6127232.32 |
| 24476 | 294047.32 | 6127254.17 |
| 24477 | 294091.29 | 6127281.83 |
| 24478 | 293867.28 | 6126549.45 |
| 24479 | 293888.14 | 6126705.68 |
| 24480 | 294078.71 | 6126556.21 |
| 24481 | 294076.47 | 6126544.42 |
| 24482 | 294035.41 | 6126510.50 |
| 24483 | 294058.68 | 6126504.19 |
| 24484 | 294175.25 | 6126518.99 |
| 24485 | 294069.43 | 6126511.63 |
| 24486 | 294167.91 | 6126485.75 |
| 24487 | 294067.24 | 6126501.72 |
| 24488 | 293977.67 | 6126700.41 |
| 24489 | 293978.67 | 6126700.32 |
| 24490 | 294064.20 | 6126457.91 |
| 24491 | 294053.65 | 6126419.22 |
| 24492 | 293954.01 | 6126444.07 |
| 24493 | 294016.97 | 6126387.84 |
| 24494 | 294017.22 | 6126388.81 |
| 24495 | 294018.19 | 6126388.55 |
| 24496 | 294044.81 | 6126386.54 |
| 24497 | 294080.11 | 6126563.22 |
| 24498 | 296438.54 | 6127776.48 |
| 24499 | 296437.98 | 6127810.97 |
| 24500 | 297213.90 | 6127983.19 |
| 24501 | 297231.31 | 6127981.27 |
| 24502 | 297083.66 | 6127933.01 |
| 24503 | 294045.96 | 6126563.20 |
| 24504 | 293687.06 | 6125226.07 |
| 24505 | 293678.28 | 6125230.86 |
| 24506 | 293656.33 | 6125242.83 |
| 24507 | 293624.57 | 6125260.15 |
| 24508 | 293677.80 | 6125229.98 |
| 24509 | 293676.93 | 6125230.46 |
| 24510 | 293585.60 | 6125232.43 |

|       |           |            |
|-------|-----------|------------|
| 24511 | 293606.19 | 6125270.18 |
| 24512 | 293595.84 | 6125378.40 |
| 24513 | 293618.67 | 6125365.95 |
| 24514 | 293567.15 | 6125291.48 |
| 24515 | 293582.47 | 6125319.57 |
| 24516 | 294180.86 | 6126576.10 |
| 24517 | 296460.64 | 6127884.27 |
| 24518 | 296389.63 | 6127893.11 |
| 24519 | 294159.31 | 6126579.82 |
| 24520 | 296463.44 | 6127902.60 |
| 24521 | 296381.73 | 6127849.79 |
| 24522 | 296379.95 | 6127835.40 |
| 24523 | 296390.83 | 6127903.31 |
| 24524 | 296463.05 | 6127842.54 |
| 24525 | 296455.31 | 6127843.29 |
| 24526 | 296205.28 | 6128471.50 |
| 24527 | 296314.57 | 6128362.58 |
| 24528 | 296305.63 | 6128291.14 |
| 24529 | 296084.00 | 6128424.14 |
| 24530 | 295906.71 | 6128298.25 |
| 24531 | 295948.35 | 6128293.20 |
| 24532 | 295921.11 | 6128415.92 |
| 24533 | 296006.99 | 6128171.18 |
| 24534 | 296009.18 | 6128191.56 |
| 24535 | 296127.55 | 6128165.23 |
| 24536 | 296248.66 | 6128176.12 |
| 24537 | 296131.48 | 6128497.47 |
| 24538 | 295983.04 | 6128287.99 |
| 24539 | 296021.15 | 6128283.51 |
| 24540 | 296156.59 | 6128095.05 |
| 24541 | 296080.98 | 6128103.26 |
| 24542 | 296242.77 | 6128469.16 |
| 24543 | 296169.05 | 6128491.85 |
| 24544 | 296012.49 | 6128514.06 |
| 24545 | 295973.67 | 6128486.48 |
| 24546 | 296050.34 | 6128509.60 |
| 24547 | 296043.15 | 6128106.59 |
| 24548 | 296206.61 | 6128180.95 |
| 24549 | 294006.65 | 6126569.97 |
| 24550 | 297048.01 | 6128211.42 |
| 24551 | 297055.89 | 6128210.47 |
| 24552 | 297061.11 | 6128259.69 |
| 24553 | 297099.21 | 6128205.43 |
| 24554 | 297104.37 | 6128254.22 |
| 24555 | 297106.73 | 6128204.93 |
| 24556 | 297106.76 | 6128205.93 |
| 24557 | 297107.76 | 6128205.91 |
| 24558 | 294118.37 | 6126367.34 |
| 24559 | 293909.11 | 6126544.16 |
| 24560 | 293930.37 | 6126542.66 |



|       |           |            |
|-------|-----------|------------|
| 24561 | 294936.80 | 6128315.98 |
| 24562 | 294976.53 | 6128312.37 |
| 24563 | 294761.59 | 6128330.74 |
| 24564 | 294766.98 | 6128410.42 |
| 24565 | 294803.43 | 6128327.11 |
| 24566 | 294808.86 | 6128407.37 |
| 24567 | 294845.13 | 6128321.47 |
| 24568 | 294850.69 | 6128403.49 |
| 24569 | 294901.49 | 6128485.46 |
| 24570 | 294859.45 | 6128488.76 |
| 24571 | 294863.15 | 6128534.64 |
| 24572 | 294853.26 | 6128407.23 |
| 24573 | 294822.56 | 6128547.99 |
| 24574 | 294811.53 | 6128410.88 |
| 24575 | 297201.10 | 6127869.64 |
| 24576 | 297198.87 | 6127869.90 |
| 24577 | 297433.12 | 6127998.63 |
| 24578 | 297395.23 | 6128002.77 |
| 24579 | 297357.20 | 6128007.16 |
| 24580 | 297366.84 | 6128006.13 |
| 24581 | 293900.87 | 6126486.39 |
| 24582 | 293904.21 | 6126509.37 |
| 24583 | 293826.86 | 6126555.32 |
| 24584 | 293787.28 | 6126560.70 |
| 24585 | 293865.20 | 6126549.72 |
| 24586 | 293746.54 | 6126566.09 |
| 24587 | 295044.35 | 6124592.42 |
| 24588 | 295041.45 | 6124517.77 |
| 24589 | 294474.28 | 6126842.16 |
| 24590 | 294112.73 | 6126683.40 |
| 24591 | 294025.19 | 6126698.66 |
| 24592 | 296017.82 | 6124989.08 |
| 24593 | 296040.86 | 6125025.47 |
| 24594 | 295989.03 | 6124958.13 |
| 24595 | 297147.47 | 6128110.85 |
| 24596 | 297131.03 | 6128210.87 |
| 24597 | 296005.01 | 6128171.44 |
| 24598 | 295859.70 | 6125160.50 |
| 24599 | 295861.70 | 6125160.45 |
| 24600 | 295851.69 | 6124989.01 |
| 24601 | 295849.69 | 6124989.02 |
| 24602 | 295870.50 | 6125160.20 |
| 24603 | 295860.57 | 6125176.07 |
| 24604 | 295954.37 | 6124981.46 |
| 24605 | 295954.33 | 6124983.46 |
| 24606 | 296889.37 | 6128091.73 |
| 24607 | 296892.99 | 6128120.30 |
| 24608 | 297464.01 | 6127955.21 |
| 24609 | 297466.40 | 6127954.95 |
| 24610 | 297324.82 | 6128038.74 |

|       |           |            |
|-------|-----------|------------|
| 24611 | 297325.75 | 6128046.98 |
| 24612 | 297132.55 | 6128042.16 |
| 24613 | 297136.21 | 6128071.37 |
| 24614 | 297269.72 | 6127976.90 |
| 24615 | 297272.90 | 6127976.52 |
| 24616 | 297390.53 | 6127962.99 |
| 24617 | 297431.95 | 6127958.69 |
| 24618 | 297436.51 | 6128029.73 |
| 24619 | 297127.93 | 6127993.53 |
| 24620 | 297123.86 | 6127993.87 |
| 24621 | 297114.15 | 6127994.69 |
| 24622 | 297086.05 | 6127997.62 |
| 24623 | 297321.70 | 6128010.96 |
| 24624 | 297360.41 | 6128035.79 |
| 24625 | 297373.48 | 6128034.71 |
| 24626 | 297398.62 | 6128033.08 |
| 24627 | 297392.59 | 6128033.61 |
| 24628 | 297317.24 | 6127971.16 |
| 24629 | 297313.39 | 6127971.62 |
| 24630 | 297281.23 | 6128048.94 |
| 24631 | 297103.62 | 6128044.95 |
| 24632 | 297184.03 | 6127986.51 |
| 24633 | 297191.35 | 6128057.39 |
| 24634 | 295866.05 | 6125064.31 |
| 24635 | 295863.87 | 6124988.61 |
| 24636 | 295914.72 | 6124982.83 |
| 24637 | 295913.70 | 6124936.84 |
| 24638 | 295638.95 | 6128104.35 |
| 24639 | 295626.64 | 6128105.51 |
| 24640 | 295641.96 | 6128122.29 |
| 24641 | 295688.94 | 6128174.18 |
| 24642 | 295830.91 | 6128040.56 |
| 24643 | 295850.35 | 6124905.68 |
| 24644 | 295844.59 | 6124822.90 |
| 24645 | 295843.87 | 6124812.93 |
| 24646 | 295859.27 | 6128113.32 |
| 24647 | 295719.91 | 6128208.19 |
| 24648 | 295754.62 | 6128246.40 |
| 24649 | 295940.09 | 6124851.41 |
| 24650 | 297475.05 | 6128034.64 |
| 24651 | 297237.44 | 6128050.51 |
| 24652 | 297442.36 | 6127997.62 |
| 24653 | 297203.12 | 6127869.41 |
| 24654 | 297444.79 | 6128029.26 |
| 24655 | 295605.81 | 6128082.19 |
| 24656 | 295959.64 | 6124936.78 |
| 24657 | 293680.85 | 6125348.54 |
| 24658 | 293660.47 | 6125310.97 |
| 24659 | 293716.65 | 6125280.32 |
| 24660 | 295843.24 | 6124806.56 |

|       |           |            |
|-------|-----------|------------|
| 24661 | 295907.86 | 6124983.07 |
| 24662 | 294068.51 | 6127873.23 |
| 24663 | 297008.44 | 6128102.26 |
| 24664 | 297030.79 | 6128099.87 |
| 24665 | 297078.77 | 6128094.66 |
| 24666 | 297086.62 | 6128170.16 |
| 24667 | 297034.87 | 6128140.18 |
| 24668 | 296955.51 | 6128113.77 |
| 24669 | 296959.24 | 6128151.41 |
| 24670 | 297046.07 | 6128200.25 |
| 24671 | 293921.24 | 6125761.30 |
| 24672 | 293931.99 | 6125784.93 |
| 24673 | 293986.68 | 6125747.79 |
| 24674 | 293938.25 | 6125798.28 |
| 24675 | 293996.99 | 6125767.95 |
| 24676 | 293953.90 | 6125829.78 |
| 24677 | 294013.03 | 6125798.85 |
| 24678 | 294016.38 | 6125805.18 |
| 24679 | 293967.07 | 6125856.48 |
| 24680 | 293678.73 | 6127867.70 |
| 24681 | 293677.91 | 6127868.27 |
| 24682 | 293611.37 | 6127910.10 |
| 24683 | 293610.66 | 6127910.52 |
| 24684 | 293526.22 | 6127963.81 |
| 24685 | 293527.04 | 6127963.22 |
| 24686 | 293624.96 | 6128058.33 |
| 24687 | 293625.52 | 6128057.98 |
| 24688 | 293434.68 | 6128025.10 |
| 24689 | 293435.51 | 6128026.47 |
| 24690 | 297160.99 | 6127947.72 |
| 24691 | 293611.85 | 6127910.85 |
| 24692 | 293577.29 | 6127932.27 |
| 24693 | 293648.07 | 6127887.87 |
| 24694 | 293679.29 | 6127868.61 |
| 24695 | 293683.99 | 6127865.78 |
| 24696 | 293850.82 | 6128127.43 |
| 24697 | 293397.07 | 6127942.80 |
| 24698 | 293360.15 | 6127965.93 |
| 24699 | 293518.28 | 6128003.91 |
| 24700 | 293647.07 | 6128043.51 |
| 24701 | 293588.73 | 6127950.45 |
| 24702 | 293683.06 | 6128020.69 |
| 24703 | 293623.72 | 6127927.69 |
| 24704 | 293435.66 | 6128024.41 |
| 24705 | 293761.14 | 6127988.43 |
| 24706 | 293751.48 | 6127977.07 |
| 24707 | 293862.27 | 6127894.03 |
| 24708 | 293539.81 | 6127959.31 |
| 24709 | 293537.15 | 6127958.35 |
| 24710 | 293792.92 | 6127965.44 |

|       |           |            |
|-------|-----------|------------|
| 24711 | 293684.35 | 6128019.74 |
| 24712 | 293728.55 | 6128089.30 |
| 24713 | 293755.07 | 6128072.89 |
| 24714 | 293483.05 | 6128026.35 |
| 24715 | 295085.37 | 6128156.40 |
| 24716 | 295073.18 | 6128033.65 |
| 24717 | 295998.54 | 6125731.93 |
| 24718 | 295998.75 | 6125730.29 |
| 24719 | 295975.95 | 6125729.12 |
| 24720 | 293954.90 | 6125481.37 |
| 24721 | 293931.34 | 6125438.33 |
| 24722 | 293959.13 | 6125423.26 |
| 24723 | 293911.10 | 6125537.74 |
| 24724 | 293873.22 | 6125470.97 |
| 24725 | 293966.87 | 6125502.86 |
| 24726 | 293844.16 | 6125420.43 |
| 24727 | 293834.98 | 6125404.46 |
| 24728 | 293881.47 | 6125466.10 |
| 24729 | 293874.77 | 6125470.07 |
| 24730 | 293969.17 | 6125506.83 |
| 24731 | 293979.27 | 6125524.37 |
| 24732 | 294004.15 | 6125511.69 |
| 24733 | 293983.39 | 6125466.20 |
| 24734 | 293880.75 | 6125464.48 |
| 24735 | 293822.55 | 6125383.56 |
| 24736 | 293823.73 | 6125385.33 |
| 24737 | 294125.52 | 6125560.38 |
| 24738 | 294157.92 | 6125624.18 |
| 24739 | 294090.80 | 6125578.04 |
| 24740 | 294071.54 | 6125541.09 |
| 24741 | 294094.51 | 6125585.61 |
| 24742 | 294123.98 | 6125641.05 |
| 24743 | 294092.01 | 6125577.48 |
| 24744 | 294123.96 | 6125561.07 |
| 24745 | 294139.85 | 6125672.18 |
| 24746 | 294168.03 | 6125644.16 |
| 24747 | 294070.86 | 6125539.97 |
| 24748 | 293900.56 | 6125626.70 |
| 24749 | 293944.78 | 6125603.24 |
| 24750 | 294111.22 | 6125531.63 |
| 24751 | 293912.51 | 6125536.89 |
| 24752 | 293943.21 | 6125592.83 |
| 24753 | 294037.77 | 6125307.97 |
| 24754 | 294083.00 | 6125283.73 |
| 24755 | 294019.71 | 6125274.78 |
| 24756 | 294065.71 | 6125250.23 |
| 24757 | 293958.76 | 6125308.24 |
| 24758 | 294143.36 | 6125482.89 |
| 24759 | 294183.91 | 6125461.99 |
| 24760 | 294186.52 | 6125418.65 |

|       |           |            |
|-------|-----------|------------|
| 24761 | 294156.51 | 6125434.25 |
| 24762 | 294142.85 | 6125408.87 |
| 24763 | 294103.54 | 6125429.00 |
| 24764 | 294120.40 | 6125367.83 |
| 24765 | 294052.15 | 6125334.23 |
| 24766 | 293940.42 | 6125368.91 |
| 24767 | 293919.29 | 6125329.63 |
| 24768 | 294125.46 | 6125450.16 |
| 24769 | 293597.88 | 6125274.72 |
| 24770 | 293613.20 | 6125302.81 |
| 24771 | 293742.99 | 6125265.95 |
| 24772 | 293672.14 | 6125271.80 |
| 24773 | 293728.08 | 6125203.57 |
| 24774 | 294117.27 | 6125454.48 |
| 24775 | 294087.94 | 6125469.76 |
| 24776 | 294053.82 | 6125487.52 |
| 24777 | 294057.97 | 6125494.89 |
| 24778 | 294057.53 | 6125413.26 |
| 24779 | 294086.55 | 6125397.51 |
| 24780 | 294005.85 | 6125316.96 |
| 24781 | 294027.55 | 6125357.83 |
| 24782 | 294026.69 | 6125358.34 |
| 24783 | 294027.15 | 6125359.23 |
| 24784 | 294038.20 | 6125377.74 |
| 24785 | 294131.12 | 6125447.45 |
| 24786 | 294131.62 | 6125448.32 |
| 24787 | 294132.46 | 6125447.78 |
| 24788 | 294140.39 | 6125356.78 |
| 24789 | 294067.37 | 6125362.02 |
| 24790 | 294034.19 | 6125301.40 |
| 24791 | 293652.61 | 6125311.55 |
| 24792 | 293577.59 | 6125352.47 |
| 24793 | 299463.05 | 6129537.48 |
| 24794 | 299445.83 | 6129507.73 |
| 24795 | 299473.18 | 6129491.90 |
| 24796 | 299474.91 | 6129490.90 |
| 24797 | 299492.13 | 6129520.64 |
| 24798 | 299510.05 | 6129470.56 |
| 24799 | 299527.27 | 6129500.30 |
| 24800 | 299545.18 | 6129450.21 |
| 24801 | 299578.59 | 6129430.87 |
| 24802 | 299580.32 | 6129429.87 |
| 24803 | 299597.54 | 6129459.62 |
| 24804 | 299558.99 | 6129393.03 |
| 24805 | 299523.86 | 6129413.38 |
| 24806 | 299488.72 | 6129433.72 |
| 24807 | 299453.58 | 6129454.06 |
| 24808 | 299346.40 | 6129335.99 |
| 24809 | 299349.97 | 6129333.92 |
| 24810 | 299345.24 | 6129333.99 |

|       |           |            |
|-------|-----------|------------|
| 24811 | 299063.38 | 6128907.05 |
| 24812 | 299562.40 | 6129480.00 |
| 24813 | 295205.34 | 6128156.67 |
| 24814 | 293685.13 | 6125089.48 |
| 24815 | 293722.93 | 6125058.46 |
| 24816 | 293635.04 | 6125118.52 |
| 24817 | 295146.09 | 6128162.74 |
| 24818 | 293864.01 | 6125079.29 |
| 24819 | 293868.41 | 6125076.91 |
| 24820 | 293849.04 | 6125052.15 |
| 24821 | 293836.02 | 6125028.88 |
| 24822 | 293853.37 | 6125049.64 |
| 24823 | 293997.18 | 6127926.92 |
| 24824 | 294006.71 | 6127937.08 |
| 24825 | 293995.75 | 6127928.19 |
| 24826 | 293856.91 | 6128067.25 |
| 24827 | 293917.85 | 6127948.08 |
| 24828 | 293946.36 | 6127920.36 |
| 24829 | 294080.74 | 6128035.43 |
| 24830 | 294041.82 | 6128074.99 |
| 24831 | 294074.55 | 6128109.14 |
| 24832 | 294010.82 | 6128044.43 |
| 24833 | 295001.17 | 6128310.63 |
| 24834 | 295001.05 | 6128308.63 |
| 24835 | 294904.60 | 6128525.00 |
| 24836 | 294895.37 | 6128407.32 |
| 24837 | 294952.39 | 6128481.49 |
| 24838 | 294956.19 | 6128528.76 |
| 24839 | 294996.89 | 6128520.25 |
| 24840 | 294993.61 | 6128478.36 |
| 24841 | 295028.91 | 6128395.37 |
| 24842 | 295035.16 | 6128475.10 |
| 24843 | 295025.35 | 6128475.77 |
| 24844 | 295038.60 | 6128518.97 |
| 24845 | 295074.72 | 6128519.44 |
| 24846 | 295070.99 | 6128472.30 |
| 24847 | 295064.77 | 6128393.83 |
| 24849 | 296857.00 | 6127389.78 |
| 24850 | 296880.89 | 6127386.47 |
| 24851 | 296851.17 | 6127236.24 |
| 24852 | 296882.27 | 6127386.26 |
| 24853 | 295239.98 | 6126852.78 |
| 24854 | 295438.23 | 6127043.14 |
| 24855 | 295551.68 | 6127053.36 |
| 24856 | 295460.47 | 6126877.11 |
| 24857 | 297947.88 | 6126130.03 |
| 24858 | 297958.17 | 6126122.30 |
| 24859 | 297890.25 | 6126063.27 |
| 24860 | 297904.87 | 6126051.72 |
| 24861 | 294980.10 | 6128312.18 |

|       |           |            |
|-------|-----------|------------|
| 24862 | 294980.30 | 6128314.24 |
| 24863 | 295160.15 | 6128300.00 |
| 24864 | 294940.93 | 6126678.13 |
| 24865 | 294938.80 | 6126677.92 |
| 24866 | 294938.17 | 6126685.90 |
| 24867 | 294138.75 | 6127708.38 |
| 24868 | 294103.15 | 6128137.09 |
| 24869 | 294105.37 | 6128139.01 |
| 24870 | 294156.69 | 6128087.86 |
| 24871 | 294175.12 | 6128106.60 |
| 24872 | 294155.57 | 6128088.49 |
| 24873 | 294075.66 | 6128107.87 |
| 24874 | 294104.89 | 6128077.37 |
| 24875 | 294092.98 | 6128023.67 |
| 24876 | 294094.41 | 6128022.24 |
| 24877 | 294139.37 | 6128045.28 |
| 24878 | 294169.08 | 6128076.58 |
| 24879 | 294183.69 | 6128002.22 |
| 24880 | 294040.20 | 6128014.13 |
| 24881 | 294011.95 | 6128043.20 |
| 24882 | 294007.24 | 6128040.81 |
| 24883 | 294148.11 | 6127970.61 |
| 24884 | 294106.48 | 6128010.01 |
| 24885 | 294046.59 | 6127948.36 |
| 24886 | 294085.81 | 6127909.36 |
| 24887 | 294120.30 | 6127935.18 |
| 24888 | 294075.18 | 6127977.28 |
| 24889 | 294089.94 | 6128020.36 |
| 24890 | 293965.26 | 6127957.54 |
| 24891 | 294138.33 | 6128169.82 |
| 24892 | 294164.45 | 6128143.86 |
| 24893 | 294388.39 | 6129168.36 |
| 24894 | 293289.62 | 6131124.07 |
| 24895 | 293284.00 | 6131128.82 |
| 24896 | 293427.13 | 6131258.60 |
| 24897 | 293446.08 | 6131239.63 |
| 24898 | 296335.92 | 6127830.66 |
| 24899 | 296342.32 | 6127877.90 |
| 24900 | 296334.65 | 6127946.23 |
| 24901 | 296125.53 | 6126295.47 |
| 24902 | 297120.22 | 6126692.97 |
| 24903 | 297165.68 | 6126475.32 |
| 24904 | 297224.70 | 6126480.87 |
| 24905 | 297375.62 | 6126505.51 |
| 24906 | 297345.63 | 6126500.57 |
| 24907 | 295027.88 | 6126273.60 |
| 24908 | 297453.79 | 6127414.27 |
| 24909 | 297158.85 | 6127465.58 |
| 24910 | 296012.33 | 6126816.71 |
| 24911 | 295285.65 | 6126318.53 |

|       |           |            |
|-------|-----------|------------|
| 24912 | 295273.59 | 6126432.35 |
| 24913 | 295287.23 | 6126307.81 |
| 24914 | 295286.79 | 6126311.48 |
| 24915 | 295170.28 | 6126173.02 |
| 24916 | 295796.89 | 6126208.99 |
| 24917 | 295786.83 | 6126283.63 |
| 24918 | 295197.91 | 6125919.29 |
| 24919 | 295198.06 | 6125917.89 |
| 24920 | 299305.45 | 6129263.52 |
| 24921 | 299372.77 | 6129320.77 |
| 24922 | 299376.47 | 6129318.64 |
| 24923 | 299411.48 | 6129298.44 |
| 24924 | 299443.59 | 6129279.92 |
| 24925 | 299474.08 | 6129262.34 |
| 24926 | 299477.85 | 6129260.16 |
| 24927 | 299495.93 | 6129249.74 |
| 24928 | 299448.38 | 6129209.14 |
| 24929 | 299443.59 | 6129279.92 |
| 24930 | 299408.93 | 6129218.87 |
| 24931 | 299411.48 | 6129298.44 |
| 24932 | 299372.72 | 6129232.92 |
| 24933 | 299334.90 | 6129250.21 |
| 24934 | 297966.43 | 6126133.87 |
| 24935 | 297852.58 | 6126098.02 |
| 24936 | 297836.79 | 6126077.95 |
| 24937 | 297878.78 | 6126016.99 |
| 24938 | 295831.84 | 6125297.30 |
| 24939 | 295646.46 | 6126365.70 |
| 24940 | 295391.94 | 6126581.98 |
| 24941 | 297141.09 | 6126958.14 |
| 24942 | 295257.66 | 6126430.13 |
| 24943 | 294764.92 | 6126003.95 |
| 24944 | 295544.46 | 6127191.61 |
| 24945 | 295522.43 | 6127358.01 |
| 24946 | 295652.99 | 6125398.25 |
| 24947 | 294758.22 | 6127878.65 |
| 24948 | 296148.75 | 6125920.67 |
| 24949 | 294324.93 | 6125866.22 |
| 24950 | 294395.14 | 6125860.84 |
| 24951 | 294351.18 | 6125742.28 |
| 24952 | 293467.25 | 6127269.97 |
| 24953 | 296405.03 | 6128352.73 |
| 24954 | 296523.68 | 6128798.44 |
| 24955 | 294732.86 | 6126835.84 |
| 24956 | 297391.28 | 6127113.56 |
| 24957 | 294555.61 | 6127168.21 |
| 24958 | 294732.62 | 6127127.42 |
| 24959 | 295529.75 | 6125205.71 |
| 24960 | 295589.45 | 6126776.92 |
| 24961 | 294238.53 | 6125511.09 |



|       |           |            |
|-------|-----------|------------|
| 24962 | 295481.68 | 6126087.78 |
| 24963 | 295485.20 | 6125829.38 |
| 24964 | 296433.06 | 6128424.30 |
| 24965 | 297115.48 | 6127375.71 |
| 24966 | 295043.07 | 6127558.88 |
| 24967 | 294269.96 | 6126452.68 |
| 24968 | 295375.63 | 6124964.26 |
| 24969 | 295835.09 | 6127986.27 |
| 24970 | 293226.40 | 6126883.74 |
| 24971 | 295973.56 | 6126022.09 |
| 24972 | 294161.74 | 6126141.26 |
| 24973 | 296338.81 | 6126310.49 |
| 24974 | 297713.81 | 6127371.76 |
| 24975 | 296310.82 | 6126254.10 |
| 24976 | 293968.32 | 6125049.55 |
| 24977 | 294183.08 | 6127650.74 |
| 24978 | 293971.67 | 6124664.87 |
| 24979 | 293973.11 | 6125043.82 |
| 24980 | 293940.12 | 6124921.85 |
| 24981 | 298061.09 | 6126775.45 |
| 24982 | 298151.00 | 6126726.97 |
| 24983 | 294644.04 | 6128036.78 |
| 24984 | 296989.08 | 6127362.74 |
| 24985 | 298729.68 | 6127974.87 |
| 24986 | 293378.33 | 6127324.29 |
| 24987 | 294389.91 | 6127158.10 |
| 24988 | 295834.67 | 6125376.24 |
| 24989 | 296783.25 | 6128382.25 |
| 24990 | 295528.52 | 6125251.77 |
| 24991 | 294665.10 | 6127636.39 |
| 24992 | 296343.13 | 6126067.28 |
| 24993 | 296367.56 | 6125102.52 |
| 24994 | 296186.95 | 6127220.83 |
| 24995 | 295711.76 | 6127371.51 |
| 24996 | 295567.20 | 6127045.15 |
| 24997 | 294975.48 | 6128044.75 |
| 24998 | 295689.82 | 6126833.39 |
| 24999 | 298392.27 | 6127057.65 |
| 25000 | 294994.70 | 6124645.80 |
| 25001 | 296014.76 | 6125204.38 |
| 25002 | 296715.44 | 6125876.53 |
| 25003 | 296855.27 | 6127794.43 |
| 25004 | 295628.81 | 6128242.07 |
| 25006 | 296759.37 | 6125933.12 |
| 25007 | 296758.86 | 6125695.95 |
| 25008 | 294982.24 | 6128042.13 |
| 25009 | 295203.57 | 6127062.11 |
| 25010 | 295122.52 | 6126602.33 |
| 25011 | 295154.57 | 6126314.24 |
| 25012 | 294956.59 | 6127271.24 |

|       |           |            |
|-------|-----------|------------|
| 25013 | 294785.21 | 6125500.56 |
| 25014 | 297686.66 | 6127341.72 |
| 25015 | 298056.96 | 6126519.12 |
| 25016 | 298308.38 | 6126307.36 |
| 25017 | 295133.06 | 6125280.32 |
| 25018 | 294212.76 | 6125423.49 |
| 25019 | 295352.47 | 6126839.57 |
| 25020 | 294088.59 | 6127207.25 |
| 25021 | 295030.35 | 6124255.59 |
| 25022 | 298263.88 | 6127366.70 |
| 25023 | 295982.77 | 6126460.10 |
| 25024 | 296467.48 | 6126207.69 |
| 25025 | 296584.09 | 6126711.13 |
| 25026 | 296305.58 | 6125297.62 |
| 25027 | 295101.48 | 6126714.45 |
| 25028 | 299058.59 | 6128451.56 |
| 25029 | 293381.69 | 6126949.43 |
| 25030 | 297917.55 | 6127530.38 |
| 25031 | 294830.04 | 6126700.03 |
| 25032 | 297847.32 | 6127813.43 |
| 25033 | 298180.93 | 6127886.49 |
| 25034 | 295216.56 | 6125807.99 |
| 25035 | 295049.59 | 6128297.96 |
| 25036 | 298559.04 | 6128904.78 |
| 25037 | 298557.85 | 6128898.19 |
| 25038 | 297587.99 | 6127582.00 |
| 25039 | 294898.97 | 6128102.32 |
| 25040 | 296589.00 | 6127405.77 |
| 25041 | 295202.27 | 6127881.06 |
| 25042 | 296355.14 | 6127942.76 |
| 25043 | 299038.32 | 6128110.85 |
| 25044 | 297757.89 | 6127363.55 |
| 25045 | 297827.17 | 6126578.02 |
| 25046 | 296574.39 | 6127426.15 |
| 25048 | 298545.81 | 6127197.73 |
| 25049 | 294862.13 | 6126679.13 |
| 25050 | 294906.82 | 6126683.25 |
| 25051 | 295039.55 | 6126617.44 |
| 25052 | 297349.06 | 6127343.43 |
| 25053 | 299015.17 | 6129099.08 |
| 25054 | 295233.81 | 6126123.34 |
| 25055 | 293093.03 | 6126848.64 |
| 25056 | 298813.37 | 6127751.68 |
| 25057 | 298569.27 | 6127219.46 |
| 25058 | 298572.15 | 6127225.76 |
| 25059 | 297491.30 | 6127952.45 |
| 25060 | 293044.46 | 6126775.83 |
| 25061 | 295731.72 | 6128308.23 |
| 25062 | 296543.82 | 6128225.83 |
| 25063 | 297068.24 | 6127959.83 |

|       |           |            |
|-------|-----------|------------|
| 25064 | 299940.74 | 6128229.76 |
| 25065 | 295917.65 | 6126239.74 |
| 25066 | 293675.81 | 6127329.01 |
| 25067 | 293546.05 | 6126778.20 |
| 25068 | 295705.34 | 6125754.19 |
| 25069 | 294619.88 | 6126120.89 |
| 25070 | 294590.11 | 6126548.69 |
| 25071 | 294903.93 | 6125967.30 |
| 25072 | 297326.72 | 6127659.35 |
| 25073 | 294904.70 | 6126669.85 |
| 25074 | 297685.51 | 6127340.89 |
| 25075 | 293961.61 | 6127220.36 |
| 25076 | 293680.46 | 6127237.18 |
| 25077 | 294104.49 | 6126841.22 |
| 25078 | 293964.67 | 6126836.76 |
| 25079 | 293757.00 | 6126867.08 |
| 25080 | 295694.23 | 6126093.78 |
| 25081 | 295470.67 | 6126709.65 |
| 25082 | 295688.38 | 6128657.43 |
| 25083 | 295580.07 | 6128419.14 |
| 25084 | 295574.35 | 6128531.54 |
| 25085 | 298655.87 | 6128885.38 |
| 25086 | 296627.36 | 6126656.38 |
| 25087 | 296509.80 | 6126644.19 |
| 25088 | 296779.79 | 6126089.52 |
| 25089 | 296687.95 | 6125997.39 |
| 25090 | 296819.16 | 6126254.90 |
| 25091 | 296641.72 | 6126493.40 |
| 25092 | 296631.87 | 6126346.00 |
| 25093 | 296422.57 | 6126438.72 |
| 25094 | 296562.50 | 6126126.84 |
| 25095 | 296426.17 | 6126076.53 |
| 25096 | 296394.73 | 6126550.09 |
| 25097 | 296121.72 | 6127067.22 |
| 25098 | 296169.81 | 6127065.94 |
| 25099 | 296066.88 | 6125273.31 |
| 25100 | 297143.91 | 6128218.94 |
| 25101 | 297308.46 | 6128274.88 |
| 25102 | 297458.25 | 6128146.96 |
| 25103 | 297219.74 | 6128399.86 |
| 25104 | 294343.81 | 6126780.68 |
| 25105 | 294326.70 | 6126642.05 |
| 25106 | 294358.34 | 6127080.59 |
| 25107 | 294399.10 | 6126179.09 |
| 25108 | 296981.28 | 6127728.02 |
| 25109 | 296881.64 | 6127503.77 |
| 25110 | 294859.24 | 6124699.89 |
| 25111 | 294653.99 | 6124665.69 |
| 25112 | 295050.54 | 6124583.56 |
| 25113 | 296209.61 | 6124959.06 |

|       |           |            |
|-------|-----------|------------|
| 25114 | 295367.80 | 6128513.11 |
| 25115 | 296915.91 | 6127877.75 |
| 25116 | 296904.97 | 6127396.33 |
| 25117 | 296985.96 | 6127453.80 |
| 25118 | 297027.63 | 6127393.05 |
| 25119 | 297090.46 | 6127597.10 |
| 25120 | 293886.66 | 6127916.46 |
| 25121 | 293854.02 | 6128060.44 |
| 25122 | 296015.37 | 6125153.94 |
| 25123 | 297066.85 | 6128687.57 |
| 25124 | 295646.22 | 6128251.70 |
| 25125 | 293038.82 | 6126949.82 |
| 25126 | 295294.72 | 6126190.69 |
| 25127 | 296861.46 | 6128731.06 |
| 25128 | 296759.18 | 6128881.58 |
| 25129 | 293382.49 | 6126950.59 |
| 25130 | 293674.52 | 6126572.26 |
| 25131 | 294386.99 | 6127610.67 |
| 25132 | 294327.66 | 6127022.68 |
| 25133 | 294524.74 | 6126965.66 |
| 25134 | 293730.38 | 6128011.04 |
| 25135 | 296165.36 | 6126044.42 |
| 25136 | 296354.76 | 6125563.57 |
| 25137 | 295842.01 | 6125631.24 |
| 25138 | 293917.04 | 6126626.22 |
| 25139 | 295044.02 | 6127450.66 |
| 25140 | 296542.84 | 6125893.25 |
| 25141 | 296537.89 | 6125824.43 |
| 25142 | 295440.85 | 6128425.56 |
| 25143 | 295763.00 | 6128293.00 |
| 25144 | 295789.12 | 6124936.21 |
| 25145 | 295485.81 | 6126058.06 |
| 25146 | 295794.45 | 6125200.06 |
| 25147 | 296551.55 | 6127830.19 |
| 25148 | 295273.92 | 6126621.73 |
| 25149 | 296480.74 | 6126519.96 |
| 25150 | 296265.54 | 6127264.61 |
| 25151 | 295591.79 | 6125835.00 |
| 25152 | 295445.04 | 6128538.85 |
| 25153 | 294452.41 | 6127031.49 |
| 25154 | 295022.87 | 6128040.49 |
| 25155 | 294930.77 | 6126693.32 |
| 25156 | 297685.60 | 6126565.61 |
| 25157 | 296299.96 | 6125832.71 |
| 25158 | 296276.49 | 6127809.58 |
| 25159 | 294115.98 | 6127810.00 |
| 25160 | 297072.68 | 6128000.78 |
| 25161 | 297083.50 | 6128067.82 |
| 25162 | 295410.55 | 6127390.96 |
| 25163 | 295445.41 | 6127477.44 |

|       |           |            |
|-------|-----------|------------|
| 25164 | 295382.98 | 6127650.37 |
| 25165 | 295531.97 | 6128359.44 |
| 25166 | 295604.76 | 6128482.91 |
| 25167 | 295752.01 | 6127771.60 |
| 25168 | 295641.93 | 6128123.71 |
| 25169 | 294513.97 | 6126327.80 |
| 25170 | 296549.32 | 6126343.57 |
| 25171 | 296161.80 | 6127731.64 |
| 25172 | 297476.70 | 6127424.31 |
| 25173 | 294779.99 | 6125415.74 |
| 25174 | 294792.64 | 6125628.08 |
| 25175 | 294707.78 | 6125497.41 |
| 25176 | 295009.45 | 6125255.08 |
| 25177 | 294846.42 | 6125139.92 |
| 25178 | 293599.69 | 6126874.88 |
| 25179 | 293172.87 | 6127337.59 |
| 25180 | 294086.44 | 6125750.69 |
| 25181 | 294084.47 | 6125854.95 |
| 25182 | 294046.48 | 6125647.75 |
| 25183 | 293953.57 | 6125599.59 |
| 25184 | 293915.21 | 6125748.43 |
| 25185 | 293854.12 | 6125632.32 |
| 25186 | 293847.37 | 6125530.31 |
| 25187 | 293737.11 | 6125413.20 |
| 25188 | 293793.93 | 6125633.76 |
| 25189 | 293760.24 | 6125527.61 |
| 25190 | 294121.95 | 6125168.02 |
| 25191 | 293956.69 | 6125293.69 |
| 25192 | 293997.71 | 6125176.22 |
| 25193 | 294135.47 | 6124973.62 |
| 25194 | 294017.48 | 6124888.76 |
| 25195 | 293864.07 | 6125343.68 |
| 25196 | 293868.66 | 6125247.32 |
| 25197 | 297249.41 | 6128318.09 |
| 25198 | 298932.33 | 6128170.01 |
| 25199 | 298897.78 | 6128344.51 |
| 25200 | 298878.55 | 6128223.62 |
| 25201 | 299153.44 | 6128264.95 |
| 25202 | 294929.61 | 6128051.78 |
| 25203 | 294878.80 | 6128061.87 |
| 25204 | 298261.74 | 6129105.59 |
| 25205 | 296887.18 | 6128080.55 |
| 25206 | 294139.61 | 6127616.04 |
| 25207 | 293969.18 | 6127515.92 |
| 25208 | 295268.24 | 6126579.75 |
| 25209 | 295297.43 | 6126300.25 |
| 25210 | 295323.31 | 6126046.04 |
| 25211 | 294063.14 | 6124780.73 |
| 25212 | 294141.56 | 6126994.11 |
| 25213 | 295402.57 | 6126312.64 |

|       |           |            |
|-------|-----------|------------|
| 25214 | 295790.04 | 6125717.53 |
| 25215 | 295612.39 | 6125714.22 |
| 25216 | 295876.65 | 6125285.09 |
| 25217 | 295783.43 | 6125076.32 |
| 25218 | 295664.23 | 6124945.18 |
| 25219 | 295524.65 | 6125097.85 |
| 25220 | 295396.90 | 6125515.11 |
| 25221 | 295299.59 | 6128006.95 |
| 25222 | 295148.52 | 6128176.55 |
| 25223 | 295232.29 | 6127833.12 |
| 25224 | 295146.17 | 6127455.33 |
| 25225 | 295225.99 | 6127247.82 |
| 25226 | 295272.78 | 6126709.41 |
| 25227 | 295100.38 | 6126715.33 |
| 25228 | 297185.14 | 6126896.98 |
| 25229 | 297121.40 | 6126692.19 |
| 25230 | 297071.38 | 6126596.84 |
| 25231 | 297037.75 | 6126377.38 |
| 25232 | 296938.29 | 6126361.71 |
| 25233 | 296888.01 | 6126334.87 |
| 25234 | 297013.65 | 6126234.69 |
| 25235 | 296883.02 | 6126116.40 |
| 25236 | 297099.81 | 6126448.59 |
| 25237 | 296710.18 | 6127724.93 |
| 25238 | 296757.04 | 6127894.18 |
| 25239 | 296558.57 | 6128189.62 |
| 25240 | 296542.08 | 6128026.65 |
| 25241 | 296565.62 | 6127756.61 |
| 25242 | 296570.64 | 6127914.57 |
| 25243 | 295640.59 | 6127866.13 |
| 25244 | 295895.95 | 6127524.60 |
| 25245 | 295740.54 | 6127621.61 |
| 25246 | 295740.96 | 6127043.83 |
| 25247 | 295835.10 | 6126952.67 |
| 25248 | 295850.07 | 6126634.16 |
| 25249 | 295567.07 | 6126931.89 |
| 25250 | 295588.30 | 6126777.81 |
| 25251 | 295603.72 | 6126605.89 |
| 25252 | 295735.57 | 6126757.09 |
| 25253 | 295888.71 | 6126392.49 |
| 25254 | 295800.52 | 6126373.75 |
| 25255 | 295886.24 | 6127733.41 |
| 25256 | 294146.71 | 6127102.51 |
| 25257 | 294138.92 | 6127755.03 |
| 25258 | 294282.47 | 6126559.88 |
| 25259 | 294294.59 | 6125172.03 |
| 25260 | 293795.04 | 6125323.74 |
| 25261 | 293549.76 | 6127434.10 |
| 25262 | 293772.28 | 6127672.24 |
| 25263 | 293652.09 | 6127552.64 |

|       |           |            |
|-------|-----------|------------|
| 25264 | 294412.11 | 6126435.07 |
| 25265 | 294408.68 | 6124990.97 |
| 25266 | 297335.19 | 6127854.59 |
| 25267 | 295981.42 | 6126786.57 |
| 25268 | 296348.92 | 6126281.65 |
| 25269 | 296326.83 | 6126043.50 |
| 25270 | 296030.60 | 6126516.40 |
| 25271 | 296075.30 | 6126289.50 |
| 25272 | 298055.92 | 6127503.68 |
| 25273 | 298044.55 | 6127485.46 |
| 25274 | 298077.58 | 6127379.09 |
| 25275 | 297883.69 | 6127121.22 |
| 25276 | 297814.03 | 6126898.47 |
| 25277 | 295373.36 | 6124926.49 |
| 25278 | 299016.79 | 6128930.88 |
| 25279 | 298895.04 | 6128980.85 |
| 25280 | 298757.03 | 6129078.42 |
| 25281 | 298584.13 | 6129042.67 |
| 25282 | 298411.11 | 6129167.85 |
| 25283 | 298216.99 | 6129046.06 |
| 25284 | 298073.86 | 6128988.52 |
| 25285 | 298112.50 | 6129202.45 |
| 25286 | 297149.66 | 6127876.55 |
| 25287 | 296074.13 | 6126137.43 |
| 25288 | 294720.62 | 6125120.21 |
| 25289 | 294517.90 | 6125474.34 |
| 25290 | 294529.67 | 6125658.22 |
| 25291 | 294482.78 | 6125201.48 |
| 25292 | 296302.88 | 6125640.18 |
| 25293 | 296170.15 | 6125734.16 |
| 25294 | 295982.25 | 6125871.77 |
| 25295 | 296026.49 | 6125432.95 |
| 25296 | 296072.13 | 6125398.20 |
| 25297 | 293265.67 | 6131280.14 |
| 25298 | 294819.05 | 6128598.67 |
| 25299 | 294656.71 | 6127571.87 |
| 25300 | 297859.02 | 6127595.43 |
| 25301 | 297886.56 | 6127707.74 |
| 25302 | 298423.44 | 6129044.79 |
| 25303 | 295974.41 | 6126023.22 |
| 25304 | 293174.77 | 6126810.43 |
| 25305 | 297136.98 | 6127028.87 |
| 25306 | 295862.94 | 6127612.18 |
| 25307 | 295863.50 | 6127125.81 |
| 25308 | 295928.82 | 6127356.47 |
| 25309 | 295939.72 | 6127205.89 |
| 25310 | 295773.60 | 6127372.81 |
| 25311 | 295643.21 | 6127560.34 |
| 25312 | 295596.31 | 6127475.35 |
| 25313 | 295665.90 | 6127371.19 |

|       |           |            |
|-------|-----------|------------|
| 25314 | 295541.16 | 6127219.10 |
| 25315 | 295728.52 | 6127473.22 |
| 25316 | 295735.22 | 6127227.33 |
| 25317 | 295462.22 | 6128134.91 |
| 25318 | 297453.89 | 6126982.08 |
| 25319 | 297447.51 | 6127003.00 |
| 25320 | 297430.49 | 6126649.82 |
| 25321 | 297386.45 | 6126454.26 |
| 25322 | 297367.60 | 6126399.63 |
| 25323 | 297543.78 | 6127096.86 |
| 25324 | 298281.81 | 6127812.64 |
| 25325 | 298631.56 | 6128051.55 |
| 25326 | 297310.68 | 6127835.47 |
| 25327 | 295756.72 | 6128690.71 |
| 25328 | 298298.80 | 6127884.98 |
| 25329 | 298100.32 | 6127817.11 |
| 25330 | 298250.34 | 6127721.93 |
| 25331 | 298222.18 | 6128061.89 |
| 25332 | 298060.27 | 6127944.88 |
| 25333 | 298018.57 | 6127837.35 |
| 25334 | 298187.18 | 6127449.17 |
| 25335 | 298176.27 | 6127627.12 |
| 25336 | 298151.53 | 6127655.13 |
| 25337 | 298059.45 | 6127537.38 |
| 25338 | 298138.17 | 6127665.64 |
| 25339 | 298207.08 | 6127250.86 |
| 25340 | 297922.48 | 6127285.69 |
| 25341 | 297823.04 | 6127251.97 |
| 25342 | 298547.74 | 6127947.89 |
| 25343 | 298415.77 | 6127809.16 |
| 25344 | 298502.38 | 6127816.74 |
| 25345 | 298418.33 | 6127656.41 |
| 25346 | 299019.55 | 6128070.91 |
| 25347 | 298819.96 | 6128113.71 |
| 25348 | 298901.36 | 6128066.17 |
| 25349 | 298800.05 | 6127960.57 |
| 25350 | 298709.66 | 6127711.27 |
| 25351 | 298745.39 | 6127826.52 |
| 25352 | 298770.44 | 6127891.99 |
| 25353 | 298677.83 | 6128209.97 |
| 25354 | 298556.62 | 6127720.96 |
| 25355 | 298528.94 | 6127872.60 |
| 25356 | 298397.05 | 6128019.60 |
| 25357 | 298382.73 | 6128015.13 |
| 25358 | 298568.22 | 6127648.77 |
| 25359 | 298392.14 | 6127056.24 |
| 25360 | 298311.04 | 6127575.06 |
| 25361 | 298972.50 | 6127539.98 |
| 25362 | 295336.45 | 6125920.07 |
| 25363 | 294994.96 | 6127508.54 |



|       |           |            |
|-------|-----------|------------|
| 25364 | 294965.93 | 6124490.57 |
| 25365 | 295044.08 | 6124406.46 |
| 25366 | 295208.49 | 6128386.03 |
| 25367 | 295167.78 | 6128286.48 |
| 25368 | 295000.51 | 6128290.74 |
| 25369 | 294846.88 | 6128273.18 |
| 25370 | 294952.95 | 6128294.60 |
| 25371 | 294721.63 | 6128389.46 |
| 25372 | 297342.43 | 6127241.82 |
| 25373 | 297269.90 | 6127662.80 |
| 25374 | 295808.22 | 6126111.01 |
| 25375 | 295805.47 | 6126256.12 |
| 25376 | 295379.57 | 6125092.22 |
| 25377 | 297345.37 | 6127079.25 |
| 25378 | 297258.56 | 6127005.52 |
| 25379 | 297270.26 | 6126627.16 |
| 25380 | 297269.60 | 6126763.09 |
| 25381 | 297256.02 | 6126841.45 |
| 25382 | 295128.07 | 6125335.40 |
| 25383 | 295160.96 | 6125082.90 |
| 25384 | 295162.85 | 6124885.44 |
| 25385 | 295201.93 | 6124754.46 |
| 25386 | 294915.39 | 6125757.86 |
| 25387 | 294910.25 | 6125958.57 |
| 25388 | 294966.38 | 6125499.95 |
| 25389 | 294910.64 | 6125575.15 |
| 25390 | 294761.24 | 6125858.73 |
| 25391 | 294695.55 | 6125749.97 |
| 25392 | 294666.63 | 6125922.83 |
| 25393 | 297805.33 | 6127030.70 |
| 25394 | 297826.96 | 6127026.86 |
| 25395 | 298058.34 | 6126519.46 |
| 25396 | 297601.69 | 6127399.79 |
| 25397 | 297675.57 | 6127155.10 |
| 25398 | 294684.35 | 6126722.32 |
| 25399 | 295022.74 | 6126396.83 |
| 25400 | 294838.13 | 6126279.39 |
| 25401 | 294896.19 | 6126090.55 |
| 25402 | 295029.78 | 6126262.75 |
| 25403 | 294767.37 | 6126340.50 |
| 25404 | 294687.27 | 6126453.12 |
| 25405 | 294615.79 | 6126095.53 |
| 25406 | 294722.42 | 6126129.95 |
| 25407 | 294457.91 | 6126993.81 |
| 25408 | 294504.40 | 6126665.12 |
| 25409 | 294479.75 | 6126564.97 |
| 25410 | 295181.12 | 6125935.01 |
| 25411 | 295060.49 | 6127046.25 |
| 25412 | 294448.37 | 6125241.05 |
| 25413 | 294549.45 | 6125071.87 |

|       |           |            |
|-------|-----------|------------|
| 25414 | 294506.89 | 6124973.26 |
| 25415 | 296112.73 | 6125805.56 |
| 25416 | 296147.64 | 6125921.53 |
| 25417 | 295999.88 | 6125729.45 |
| 25418 | 295995.53 | 6125764.40 |
| 25419 | 296121.27 | 6125594.12 |
| 25420 | 296316.95 | 6125308.00 |
| 25421 | 296156.98 | 6125406.98 |
| 25422 | 293263.14 | 6131334.05 |
| 25423 | 298581.46 | 6128159.46 |
| 25424 | 297422.53 | 6128278.05 |
| 25425 | 294974.92 | 6128559.24 |
| 25426 | 294407.47 | 6127532.55 |
| 25427 | 297886.97 | 6127651.85 |
| 25428 | 297725.38 | 6127473.83 |
| 25429 | 297588.19 | 6127583.40 |
| 25430 | 294466.79 | 6124878.65 |
| 25431 | 294959.42 | 6124705.96 |
| 25432 | 294777.38 | 6124768.24 |
| 25433 | 294617.69 | 6124825.52 |
| 25434 | 294464.80 | 6124667.27 |
| 25435 | 295330.00 | 6127014.06 |
| 25436 | 295329.36 | 6125983.10 |
| 25437 | 296712.29 | 6128004.75 |
| 25438 | 295389.11 | 6128311.74 |
| 25439 | 296915.18 | 6128230.95 |
| 25440 | 296964.21 | 6127710.57 |
| 25441 | 295928.22 | 6128681.56 |
| 25442 | 297036.37 | 6127865.23 |
| 25443 | 296606.13 | 6128805.73 |
| 25444 | 296599.42 | 6128923.19 |
| 25445 | 293415.15 | 6126899.34 |
| 25446 | 293844.05 | 6126709.71 |
| 25447 | 293578.02 | 6126745.11 |
| 25448 | 293879.51 | 6126511.52 |
| 25449 | 294310.86 | 6127766.21 |
| 25450 | 294371.43 | 6127433.07 |
| 25451 | 294390.95 | 6127159.06 |
| 25452 | 294333.15 | 6126952.92 |
| 25453 | 294304.48 | 6126429.78 |
| 25454 | 294353.37 | 6126250.09 |
| 25455 | 294405.86 | 6125542.89 |
| 25456 | 294350.71 | 6125743.61 |
| 25457 | 294340.92 | 6125970.45 |
| 25458 | 294371.29 | 6125631.94 |
| 25459 | 294370.91 | 6125693.06 |
| 25460 | 294302.56 | 6124964.20 |
| 25461 | 294368.64 | 6125374.64 |
| 25462 | 294391.40 | 6125401.77 |
| 25463 | 294333.48 | 6124817.00 |

|       |           |            |
|-------|-----------|------------|
| 25464 | 293396.31 | 6126986.28 |
| 25465 | 293191.77 | 6127007.77 |
| 25466 | 293558.55 | 6127055.99 |
| 25467 | 294252.45 | 6127471.36 |
| 25468 | 294161.34 | 6127326.97 |
| 25469 | 294239.18 | 6127207.62 |
| 25470 | 294254.51 | 6127676.76 |
| 25471 | 294213.58 | 6126000.62 |
| 25472 | 294247.75 | 6126156.64 |
| 25473 | 295256.79 | 6126429.01 |
| 25474 | 295155.68 | 6126313.37 |
| 25475 | 295183.30 | 6126064.42 |
| 25476 | 295054.64 | 6127827.12 |
| 25477 | 295217.67 | 6125807.11 |
| 25478 | 295222.06 | 6125441.79 |
| 25479 | 295318.47 | 6125053.56 |
| 25480 | 294479.39 | 6126004.09 |
| 25481 | 293073.89 | 6127027.38 |
| 25482 | 294928.44 | 6125374.44 |
| 25483 | 294960.63 | 6125109.83 |
| 25484 | 294965.77 | 6125062.63 |
| 25485 | 295035.82 | 6124986.61 |
| 25486 | 294828.79 | 6125023.11 |
| 25487 | 294921.26 | 6124869.18 |
| 25488 | 294777.53 | 6125252.79 |
| 25489 | 294662.84 | 6125285.35 |
| 25490 | 294625.35 | 6125202.48 |
| 25491 | 294708.45 | 6125016.87 |
| 25492 | 294599.80 | 6124921.55 |
| 25493 | 294825.64 | 6124941.95 |
| 25494 | 294822.08 | 6125352.55 |
| 25495 | 294577.81 | 6125461.10 |
| 25496 | 294518.06 | 6125603.52 |
| 25497 | 295079.31 | 6126145.28 |
| 25498 | 295063.99 | 6126048.00 |
| 25499 | 294983.31 | 6128043.06 |
| 25500 | 294850.22 | 6128184.67 |
| 25501 | 294978.97 | 6127782.35 |
| 25502 | 294990.89 | 6127930.14 |
| 25503 | 294833.20 | 6127738.01 |
| 25504 | 294877.61 | 6127947.85 |
| 25505 | 294740.62 | 6128032.62 |
| 25506 | 294757.82 | 6127914.76 |
| 25507 | 294779.54 | 6127839.22 |
| 25508 | 294639.92 | 6127693.22 |
| 25509 | 294668.86 | 6127751.91 |
| 25510 | 294837.29 | 6127633.17 |
| 25511 | 294896.45 | 6127435.82 |
| 25512 | 294957.67 | 6127272.15 |
| 25513 | 295040.54 | 6127221.44 |

|       |           |            |
|-------|-----------|------------|
| 25514 | 294776.12 | 6127407.47 |
| 25515 | 294664.06 | 6127635.44 |
| 25516 | 294719.19 | 6127152.41 |
| 25517 | 294639.96 | 6127386.70 |
| 25518 | 294562.17 | 6127842.39 |
| 25519 | 294477.27 | 6127685.69 |
| 25520 | 294554.13 | 6127450.05 |
| 25521 | 294548.36 | 6127306.15 |
| 25522 | 294579.14 | 6127198.80 |
| 25523 | 295213.17 | 6125249.38 |
| 25524 | 295256.39 | 6125269.35 |
| 25525 | 298299.54 | 6127084.55 |
| 25526 | 298055.49 | 6127139.70 |
| 25527 | 294459.58 | 6127294.39 |
| 25528 | 294910.86 | 6127016.09 |
| 25529 | 294854.28 | 6127082.53 |
| 25530 | 294939.97 | 6126677.09 |
| 25531 | 294828.75 | 6126565.34 |
| 25532 | 294776.48 | 6127070.14 |
| 25533 | 294797.76 | 6126862.49 |
| 25534 | 294668.78 | 6127030.12 |
| 25535 | 294734.37 | 6126797.90 |
| 25536 | 294660.94 | 6126577.03 |
| 25537 | 296089.38 | 6126012.63 |
| 25538 | 296879.39 | 6126499.28 |
| 25539 | 296670.12 | 6125942.69 |
| 25540 | 296714.48 | 6125875.49 |
| 25541 | 296490.41 | 6125821.38 |
| 25542 | 295985.49 | 6128136.62 |
| 25543 | 296008.33 | 6128192.69 |
| 25544 | 296092.34 | 6127817.28 |
| 25545 | 296008.42 | 6127885.22 |
| 25546 | 296023.05 | 6127824.34 |
| 25547 | 295990.07 | 6127930.82 |
| 25548 | 296186.15 | 6127866.29 |
| 25549 | 296203.98 | 6128168.31 |
| 25550 | 296237.06 | 6127652.54 |
| 25551 | 296137.87 | 6127544.09 |
| 25552 | 295973.03 | 6127563.74 |
| 25553 | 295987.18 | 6127669.47 |
| 25554 | 296171.62 | 6127203.07 |
| 25555 | 296184.61 | 6127133.79 |
| 25556 | 296420.58 | 6128209.19 |
| 25557 | 297447.79 | 6127211.01 |
| 25558 | 297477.49 | 6127373.15 |
| 25559 | 297551.46 | 6127256.83 |
| 25560 | 297633.65 | 6126922.36 |
| 25561 | 297594.22 | 6126701.98 |
| 25562 | 297722.56 | 6126826.17 |
| 25563 | 296461.72 | 6125432.49 |

|       |           |            |
|-------|-----------|------------|
| 25564 | 296355.43 | 6125710.90 |
| 25565 | 296220.06 | 6125501.71 |
| 25566 | 295486.19 | 6126471.52 |
| 25567 | 295396.72 | 6126462.36 |
| 25568 | 295443.73 | 6126054.69 |
| 25569 | 295874.52 | 6125567.46 |
| 25570 | 295814.09 | 6125452.56 |
| 25571 | 295511.69 | 6125544.68 |
| 25572 | 295732.25 | 6125845.89 |
| 25573 | 293835.64 | 6125030.24 |
| 25574 | 293854.04 | 6124881.59 |
| 25575 | 293727.93 | 6125078.00 |
| 25576 | 293756.03 | 6124943.40 |
| 25577 | 293628.27 | 6125132.80 |
| 25578 | 293641.84 | 6125370.96 |
| 25579 | 293491.59 | 6125185.57 |
| 25580 | 293527.70 | 6125067.77 |
| 25581 | 294118.30 | 6124684.79 |
| 25582 | 295843.64 | 6124823.95 |
| 25583 | 295554.42 | 6125970.67 |
| 25584 | 295973.08 | 6126993.63 |
| 25585 | 295825.79 | 6128238.53 |
| 25586 | 295858.15 | 6127865.72 |
| 25587 | 295353.57 | 6126838.68 |
| 25588 | 295370.68 | 6128210.53 |
| 25589 | 295183.01 | 6128503.50 |
| 25590 | 295860.39 | 6128114.18 |
| 25591 | 296372.10 | 6127786.56 |
| 25592 | 295782.40 | 6125324.12 |
| 25593 | 295867.02 | 6125063.28 |
| 25594 | 295687.42 | 6125183.69 |
| 25595 | 295529.33 | 6125239.11 |
| 25596 | 295669.55 | 6125079.86 |
| 25597 | 295449.74 | 6125810.39 |
| 25598 | 295379.11 | 6125660.81 |
| 25599 | 295407.01 | 6125358.96 |
| 25600 | 295397.81 | 6125194.43 |
| 25601 | 295321.13 | 6127930.85 |
| 25602 | 295145.94 | 6128004.29 |
| 25603 | 295086.26 | 6128155.29 |
| 25604 | 295290.10 | 6127494.10 |
| 25605 | 295227.69 | 6127405.94 |
| 25606 | 295058.99 | 6127613.29 |
| 25607 | 295156.31 | 6127668.89 |
| 25608 | 295223.74 | 6127008.10 |
| 25609 | 295082.39 | 6126863.37 |
| 25610 | 295123.63 | 6126601.47 |
| 25611 | 295142.13 | 6126551.50 |
| 25612 | 298803.06 | 6128850.83 |
| 25613 | 298958.85 | 6128821.39 |

|       |           |            |
|-------|-----------|------------|
| 25614 | 298411.71 | 6128924.79 |
| 25615 | 295776.06 | 6126496.17 |
| 25616 | 296826.11 | 6127412.39 |
| 25617 | 296810.33 | 6127625.64 |
| 25618 | 296764.71 | 6127517.91 |
| 25619 | 296666.52 | 6127484.77 |
| 25620 | 296721.14 | 6127511.01 |
| 25621 | 296522.40 | 6127377.17 |
| 25622 | 296318.91 | 6128163.65 |
| 25623 | 296269.53 | 6127792.22 |
| 25624 | 296196.57 | 6127958.28 |
| 25625 | 296126.69 | 6128166.35 |
| 25626 | 295984.14 | 6128021.91 |
| 25627 | 295983.63 | 6124962.87 |
| 25628 | 296415.95 | 6125825.66 |
| 25629 | 295836.16 | 6127987.20 |
| 25630 | 296852.69 | 6126628.55 |
| 25631 | 296523.21 | 6126717.48 |
| 25632 | 296775.10 | 6126292.98 |
| 25633 | 296990.76 | 6128012.60 |
| 25634 | 294265.85 | 6125517.22 |
| 25635 | 294250.82 | 6125285.28 |
| 25636 | 294254.41 | 6125411.99 |
| 25637 | 294283.92 | 6124680.41 |
| 25638 | 294246.76 | 6124815.33 |
| 25639 | 294170.59 | 6124840.06 |
| 25640 | 293936.11 | 6127680.90 |
| 25641 | 294139.56 | 6127443.01 |
| 25642 | 293881.54 | 6127123.12 |
| 25643 | 293782.69 | 6127326.97 |
| 25644 | 293511.55 | 6127128.06 |
| 25645 | 293356.50 | 6127309.30 |
| 25646 | 293931.36 | 6126951.96 |
| 25647 | 294106.52 | 6126645.47 |
| 25648 | 293864.20 | 6126854.15 |
| 25649 | 293767.87 | 6127058.03 |
| 25650 | 295660.34 | 6126344.45 |
| 25651 | 295677.48 | 6126212.57 |
| 25652 | 295536.95 | 6126231.21 |
| 25653 | 295391.07 | 6126580.87 |
| 25654 | 295786.81 | 6128519.81 |
| 25655 | 295698.31 | 6128413.69 |
| 25656 | 297242.78 | 6126376.75 |
| 25657 | 297133.92 | 6127760.92 |
| 25658 | 297031.09 | 6128325.79 |
| 25659 | 296779.03 | 6128346.27 |
| 25660 | 296744.63 | 6128259.00 |
| 25661 | 296533.43 | 6128408.14 |
| 25662 | 296539.27 | 6128283.02 |
| 25663 | 296204.42 | 6128472.62 |

|       |           |            |
|-------|-----------|------------|
| 25664 | 296290.95 | 6128435.71 |
| 25665 | 295985.64 | 6128596.66 |
| 25666 | 295988.97 | 6128674.49 |
| 25667 | 296083.15 | 6128425.26 |
| 25668 | 295854.03 | 6128598.59 |
| 25669 | 295945.37 | 6128458.81 |
| 25670 | 295895.69 | 6128298.58 |
| 25671 | 294105.04 | 6127876.66 |
| 25672 | 293951.97 | 6128110.89 |
| 25673 | 294721.94 | 6128578.54 |
| 25674 | 294113.06 | 6127273.72 |
| 25675 | 294059.58 | 6126504.02 |
| 25676 | 297314.50 | 6127972.46 |
| 25677 | 297009.33 | 6128101.13 |
| 25678 | 295031.67 | 6124517.75 |
| 25679 | 296003.38 | 6124991.06 |
| 25680 | 297270.89 | 6127977.76 |
| 25681 | 297433.05 | 6127959.58 |
| 25682 | 297124.98 | 6127994.77 |
| 25683 | 295914.69 | 6124816.84 |
| 25684 | 295834.81 | 6128155.12 |
| 25685 | 295981.35 | 6124924.21 |
| 25686 | 296389.97 | 6127904.44 |
| 25687 | 293928.98 | 6125382.52 |
| 25688 | 294065.09 | 6125531.55 |
| 25689 | 293965.93 | 6125502.72 |
| 25690 | 294094.91 | 6125584.25 |
| 25691 | 293844.07 | 6125421.21 |
| 25692 | 299471.84 | 6129491.52 |
| 25693 | 299577.21 | 6129430.52 |
| 25694 | 294006.55 | 6127934.54 |
| 25695 | 295026.27 | 6128474.70 |
| 25696 | 297987.51 | 6126196.08 |
| 25697 | 297888.84 | 6126063.11 |
| 25698 | 297986.11 | 6126196.16 |
| 25699 | 297851.66 | 6126384.22 |
| 25700 | 294104.48 | 6128134.22 |
| 25701 | 294089.96 | 6128018.94 |
| 25702 | 294007.25 | 6128039.39 |
| 25703 | 294267.39 | 6129128.84 |
| 25704 | 293183.66 | 6130933.41 |
| 25705 | 293428.55 | 6131258.60 |
| 25706 | 296120.23 | 6126345.55 |
| 25707 | 295860.61 | 6125177.58 |
| 25708 | 295855.48 | 6126065.37 |
| 25709 | 299475.45 | 6129262.77 |
| 25710 | 299374.16 | 6129321.18 |
| 35582 | 296977.25 | 6128149.78 |
| 35584 | 296980.63 | 6128180.68 |
| 35586 | 296934.85 | 6128185.00 |

|       |           |            |
|-------|-----------|------------|
| 35588 | 296930.21 | 6128154.42 |
| 35591 | 297052.89 | 6128138.38 |
| 35593 | 297056.31 | 6128171.34 |
| 35595 | 297010.04 | 6128174.63 |
| 35597 | 297006.61 | 6128143.91 |
| 35602 | 297871.26 | 6126005.85 |
| 35604 | 297957.09 | 6125939.31 |
| 35606 | 297923.09 | 6125894.25 |
| 35608 | 297836.96 | 6125958.85 |
| 35610 | 297803.58 | 6125913.11 |
| 35612 | 297770.21 | 6125869.03 |
| 35614 | 297856.12 | 6125804.34 |
| 35616 | 297889.70 | 6125848.84 |
| 35620 | 297851.72 | 6125798.82 |
| 35622 | 297837.09 | 6125794.55 |
| 35624 | 297747.27 | 6125802.57 |
| 35628 | 296354.02 | 6125701.93 |
| 35629 | 296302.91 | 6125702.36 |
| 35637 | 298051.99 | 6127938.20 |
| 35655 | 298039.57 | 6127945.22 |
| 35657 | 298041.97 | 6127948.12 |
| 35661 | 297998.59 | 6128085.08 |
| 35662 | 297978.31 | 6128057.08 |
| 35664 | 298056.20 | 6128012.66 |
| 35666 | 298079.11 | 6128046.99 |
| 35668 | 297939.61 | 6127971.21 |
| 35671 | 297944.67 | 6127931.88 |
| 35673 | 297928.33 | 6127930.43 |
| 35676 | 297232.40 | 6128424.52 |
| 35678 | 297268.16 | 6128414.92 |
| 35680 | 297301.80 | 6128406.06 |
| 35682 | 297335.56 | 6128396.67 |
| 35684 | 297363.09 | 6128388.13 |
| 35686 | 297398.32 | 6128378.85 |
| 35688 | 297435.44 | 6128367.98 |
| 35690 | 297467.45 | 6128479.55 |
| 35692 | 297471.07 | 6128494.84 |
| 35694 | 297429.62 | 6128490.42 |
| 35696 | 297394.22 | 6128498.06 |
| 35698 | 297366.32 | 6128506.27 |
| 35700 | 297332.12 | 6128514.51 |
| 35702 | 297298.34 | 6128523.16 |
| 35704 | 297263.31 | 6128532.64 |
| 35712 | 297191.73 | 6128437.33 |
| 35714 | 297152.50 | 6128446.40 |
| 35716 | 297173.50 | 6128553.15 |
| 35718 | 297221.38 | 6128541.08 |
| 35721 | 297267.27 | 6128546.41 |
| 35724 | 297255.46 | 6128647.12 |
| 35726 | 297242.07 | 6128593.56 |



|       |           |            |
|-------|-----------|------------|
| 35728 | 297171.82 | 6128609.63 |
| 35730 | 297233.00 | 6128558.74 |
| 35732 | 297299.91 | 6128820.07 |
| 35734 | 298572.77 | 6128977.07 |
| 35737 | 298565.48 | 6128938.59 |
| 35745 | 298084.32 | 6129077.01 |
| 35748 | 298044.36 | 6129083.83 |
| 35750 | 298078.11 | 6129043.80 |
| 35753 | 298053.00 | 6129050.55 |
| 35755 | 294365.02 | 6125742.99 |
| 35757 | 294353.02 | 6125746.29 |
| 35780 | 294775.26 | 6127903.55 |
| 35849 | 295812.38 | 6128755.62 |
| 35852 | 296175.12 | 6128539.67 |
| 35854 | 296182.15 | 6128589.91 |
| 35858 | 296919.95 | 6128804.71 |
| 35860 | 297905.18 | 6129141.36 |
| 35864 | 297504.06 | 6128349.61 |
| 35868 | 298013.71 | 6128102.21 |
| 35871 | 299108.11 | 6128893.61 |
| 35874 | 297173.56 | 6127170.44 |
| 35877 | 298014.17 | 6126463.83 |
| 35880 | 293899.49 | 6127478.51 |
| 35883 | 293433.01 | 6127785.32 |
| 35937 | 294669.81 | 6128624.95 |
| 35987 | 294764.67 | 6126185.65 |
| 36755 | 294884.06 | 6125417.10 |
| 36758 | 294929.44 | 6125419.96 |
| 36764 | 299095.15 | 6128568.54 |
| 36773 | 297546.89 | 6126805.97 |
| 36775 | 297798.05 | 6126687.39 |
| 36778 | 297828.87 | 6126681.29 |
| 36782 | 297829.63 | 6126688.81 |
| 36784 | 297849.02 | 6126684.86 |
| 36801 | 297461.94 | 6127412.85 |
| 36804 | 296309.15 | 6125909.55 |
| 36807 | 296126.94 | 6126418.97 |
| 36811 | 296133.59 | 6126296.22 |
| 36814 | 295310.21 | 6127999.71 |
| 36817 | 295308.81 | 6127976.30 |
| 36820 | 298912.21 | 6128390.57 |
| 36823 | 299186.61 | 6128318.50 |
| 36826 | 299179.26 | 6128305.29 |
| 36829 | 299043.40 | 6128358.23 |
| 36832 | 299039.60 | 6128345.38 |
| 36835 | 296532.63 | 6127412.53 |
| 36838 | 296380.63 | 6127938.59 |
| 36841 | 296366.12 | 6127941.03 |
| 36844 | 296300.89 | 6125455.39 |
| 36847 | 296297.69 | 6125377.95 |

|         |           |            |
|---------|-----------|------------|
| 36850   | 294432.40 | 6125114.65 |
| 36853   | 294417.04 | 6125117.16 |
| 36856   | 296225.48 | 6127319.86 |
| 36859   | 296305.16 | 6127854.64 |
| 36862   | 296340.99 | 6127978.69 |
| 36865   | 296205.07 | 6125753.71 |
| 36868   | 295761.40 | 6127884.28 |
| 36871   | 297653.18 | 6127355.17 |
| 36874   | 296652.25 | 6127491.16 |
| 36877   | 294759.13 | 6128030.77 |
| 35478-B | 296890.82 | 6127384.80 |
| 35481-B | 296873.72 | 6127387.61 |
| 35487-B | 298558.20 | 6127209.65 |
| 35490-B | 298565.39 | 6127206.08 |
| 35496-B | 295099.77 | 6125292.64 |
| PS2     | 300701.95 | 6128337.38 |
| PS3     | 290059.85 | 6126310.26 |
| PS1     | 296646.35 | 6127226.22 |

[VERTICES]

| ;Link | X-Coord   | Y-Coord    |
|-------|-----------|------------|
| 25718 | 294350.28 | 6125742.71 |
| 25719 | 294722.53 | 6126128.95 |
| 25720 | 297386.69 | 6126453.29 |
| 25721 | 294915.76 | 6125756.94 |
| 25722 | 294372.22 | 6125631.57 |
| 25723 | 296319.90 | 6128163.53 |
| 25724 | 298398.03 | 6128019.39 |
| 25725 | 297148.66 | 6127876.65 |
| 25726 | 295986.21 | 6128597.48 |
| 25727 | 295612.54 | 6125713.23 |
| 25728 | 294720.19 | 6127152.32 |
| 25729 | 295402.69 | 6126311.65 |
| 25730 | 296219.94 | 6125502.70 |
| 25731 | 294254.43 | 6127675.76 |
| 25732 | 296422.39 | 6126439.70 |
| 25733 | 293846.88 | 6125529.43 |
| 25734 | 294797.87 | 6126861.50 |
| 25735 | 295688.42 | 6125183.68 |
| 25736 | 294663.80 | 6125285.05 |
| 25737 | 294017.82 | 6124889.70 |
| 25738 | 298222.98 | 6128062.50 |
| 25739 | 299017.71 | 6128930.50 |
| 25740 | 298708.70 | 6127711.55 |
| 25741 | 293761.11 | 6125527.12 |
| 25742 | 297633.83 | 6126923.35 |
| 25743 | 295532.97 | 6128359.37 |
| 25744 | 296916.91 | 6127877.65 |
| 25745 | 297143.02 | 6128218.48 |
| 25746 | 293854.55 | 6128061.29 |

|       |           |            |
|-------|-----------|------------|
| 25747 | 294283.61 | 6124679.46 |
| 25748 | 295390.11 | 6128311.67 |
| 25749 | 295156.26 | 6127667.90 |
| 25750 | 298546.76 | 6127948.09 |
| 25751 | 294964.93 | 6124490.60 |
| 25752 | 294465.84 | 6124878.96 |
| 25753 | 295863.03 | 6127613.18 |
| 25754 | 296819.58 | 6126254.00 |
| 25755 | 297268.92 | 6127662.97 |
| 25756 | 297336.19 | 6127854.50 |
| 25757 | 293192.31 | 6127008.61 |
| 25758 | 295529.29 | 6125238.11 |
| 25759 | 295143.12 | 6126551.59 |
| 25760 | 297594.39 | 6126702.97 |
| 25761 | 296963.21 | 6127710.51 |
| 25762 | 298412.11 | 6129167.74 |
| 25763 | 294579.02 | 6127197.80 |
| 25764 | 293492.07 | 6125186.45 |
| 25765 | 297038.66 | 6126377.78 |
| 25766 | 294480.73 | 6126564.78 |
| 25767 | 294145.71 | 6127102.62 |
| 25768 | 294990.80 | 6127929.15 |
| 25769 | 295540.69 | 6127218.22 |
| 25770 | 294342.82 | 6126780.85 |
| 25771 | 295183.19 | 6126065.42 |
| 25772 | 295297.32 | 6126301.25 |
| 25773 | 295973.14 | 6127564.73 |
| 25774 | 296534.41 | 6128407.99 |
| 25775 | 295988.18 | 6127669.38 |
| 25776 | 295450.74 | 6125810.48 |
| 25777 | 298503.36 | 6127816.51 |
| 25778 | 296147.76 | 6125920.54 |
| 25779 | 294683.37 | 6126722.50 |
| 25780 | 293357.35 | 6127308.77 |
| 25781 | 298186.25 | 6127449.53 |
| 25782 | 296172.62 | 6127203.06 |
| 25783 | 297027.74 | 6127394.05 |
| 25784 | 298416.71 | 6127808.83 |
| 25785 | 295804.48 | 6126255.98 |
| 25786 | 298556.39 | 6127719.98 |
| 25787 | 294518.27 | 6125475.27 |
| 25788 | 293881.49 | 6127124.12 |
| 25789 | 297135.99 | 6127028.99 |
| 25790 | 294083.98 | 6125854.08 |
| 25791 | 296170.27 | 6125733.16 |
| 25792 | 295000.61 | 6128291.73 |
| 25793 | 295055.63 | 6127827.04 |
| 25794 | 293936.05 | 6127681.90 |
| 25795 | 296291.28 | 6128434.77 |
| 25796 | 294846.30 | 6125140.92 |

|       |           |            |
|-------|-----------|------------|
| 25797 | 294940.97 | 6126677.13 |
| 25798 | 294578.09 | 6125462.06 |
| 25799 | 295887.72 | 6126392.36 |
| 25800 | 296914.19 | 6128231.07 |
| 25801 | 296348.90 | 6126280.65 |
| 25802 | 294327.69 | 6126641.87 |
| 25803 | 295290.18 | 6127495.10 |
| 25804 | 295446.40 | 6127477.36 |
| 25805 | 296389.84 | 6127903.45 |
| 25806 | 295801.51 | 6126373.89 |
| 25807 | 297367.39 | 6126400.61 |
| 25808 | 293627.40 | 6125133.29 |
| 25809 | 294735.36 | 6126797.75 |
| 25810 | 294667.87 | 6127751.98 |
| 25811 | 294085.97 | 6125749.81 |
| 25812 | 295228.69 | 6127405.87 |
| 25813 | 294966.76 | 6125062.72 |
| 25814 | 296883.45 | 6126115.49 |
| 25815 | 293173.96 | 6126809.83 |
| 25816 | 298177.21 | 6127626.78 |
| 25817 | 295575.35 | 6128531.49 |
| 25818 | 293640.96 | 6125371.43 |
| 25819 | 296016.37 | 6125153.89 |
| 25820 | 297447.42 | 6127003.99 |
| 25821 | 294958.48 | 6124706.30 |
| 25822 | 294408.32 | 6124990.03 |
| 25823 | 295783.40 | 6125324.08 |
| 25824 | 294122.31 | 6125168.95 |
| 25825 | 295406.05 | 6125358.70 |
| 25826 | 295553.43 | 6125970.52 |
| 25827 | 295379.50 | 6125091.22 |
| 25828 | 294995.95 | 6127508.43 |
| 25829 | 294858.89 | 6124698.95 |
| 25830 | 298054.51 | 6127139.92 |
| 25831 | 298298.56 | 6127084.77 |
| 25832 | 294247.10 | 6124816.27 |
| 25833 | 295123.51 | 6126602.46 |
| 25834 | 294708.78 | 6125497.48 |
| 25835 | 293511.59 | 6127129.06 |
| 25836 | 294695.64 | 6125748.97 |
| 25837 | 297257.61 | 6127005.84 |
| 25838 | 294599.47 | 6124920.61 |
| 25839 | 295990.17 | 6127931.81 |
| 25840 | 298568.98 | 6127649.42 |
| 25841 | 297242.94 | 6126375.77 |
| 25842 | 297822.87 | 6127250.99 |
| 25843 | 295257.78 | 6126429.14 |
| 25844 | 297037.37 | 6127865.11 |
| 25845 | 294687.39 | 6126452.12 |
| 25846 | 294779.55 | 6127840.22 |

|       |           |            |
|-------|-----------|------------|
| 25847 | 297269.26 | 6126627.06 |
| 25848 | 295835.15 | 6126953.67 |
| 25849 | 293887.37 | 6127917.17 |
| 25850 | 294825.98 | 6124942.90 |
| 25851 | 295973.42 | 6126023.08 |
| 25852 | 295789.05 | 6125717.40 |
| 25853 | 294838.02 | 6126280.38 |
| 25854 | 295208.38 | 6128385.03 |
| 25855 | 294776.59 | 6127069.14 |
| 25856 | 295982.42 | 6126786.68 |
| 25857 | 295082.50 | 6126862.38 |
| 25858 | 295645.23 | 6128251.84 |
| 25859 | 296640.73 | 6126493.27 |
| 25860 | 296197.57 | 6127958.17 |
| 25861 | 294761.13 | 6125859.72 |
| 25862 | 295982.77 | 6124963.37 |
| 25863 | 295567.19 | 6126930.89 |
| 25864 | 296184.68 | 6127132.80 |
| 25865 | 295895.86 | 6127523.60 |
| 25866 | 295697.32 | 6128413.74 |
| 25867 | 294779.05 | 6125416.06 |
| 25868 | 295887.23 | 6127733.30 |
| 25869 | 295736.22 | 6127227.25 |
| 25870 | 296009.42 | 6127885.11 |
| 25871 | 296669.12 | 6125942.66 |
| 25872 | 298061.02 | 6127945.55 |
| 25873 | 294720.32 | 6125119.26 |
| 25874 | 294302.91 | 6124965.14 |
| 25875 | 294371.58 | 6127434.06 |
| 25876 | 294778.52 | 6125252.90 |
| 25877 | 297219.48 | 6128398.90 |
| 25878 | 296161.89 | 6127732.64 |
| 25879 | 296187.15 | 6127866.19 |
| 25880 | 296981.38 | 6127729.01 |
| 25881 | 293835.15 | 6125029.37 |
| 25882 | 295876.67 | 6125286.09 |
| 25883 | 293652.84 | 6127553.30 |
| 25884 | 295155.56 | 6126314.36 |
| 25885 | 298216.01 | 6129046.24 |
| 25886 | 298957.87 | 6128821.57 |
| 25887 | 294465.16 | 6124668.20 |
| 25888 | 295353.46 | 6126839.67 |
| 25889 | 296543.07 | 6128026.50 |
| 25890 | 295777.05 | 6126496.30 |
| 25891 | 294554.11 | 6127449.05 |
| 25892 | 298057.48 | 6126519.98 |
| 25893 | 297885.58 | 6127707.91 |
| 25894 | 294504.21 | 6126664.14 |
| 25895 | 295851.06 | 6126634.28 |
| 25896 | 298072.88 | 6128988.71 |

|       |           |            |
|-------|-----------|------------|
| 25897 | 298261.55 | 6129104.61 |
| 25898 | 297721.57 | 6126826.34 |
| 25899 | 293766.87 | 6127058.08 |
| 25900 | 298419.26 | 6127656.05 |
| 25901 | 296557.58 | 6128189.76 |
| 25902 | 296571.63 | 6127914.45 |
| 25903 | 295300.59 | 6128006.89 |
| 25904 | 298410.73 | 6128924.98 |
| 25905 | 298137.63 | 6127664.80 |
| 25906 | 298152.07 | 6127655.97 |
| 25907 | 295982.11 | 6125872.76 |
| 25908 | 296887.79 | 6126335.85 |
| 25909 | 297344.37 | 6127079.17 |
| 25910 | 295694.09 | 6126094.77 |
| 25911 | 296779.76 | 6126090.52 |
| 25912 | 294513.70 | 6126326.84 |
| 25913 | 296371.11 | 6127786.70 |
| 25914 | 294138.85 | 6127754.04 |
| 25915 | 295677.33 | 6126213.56 |
| 25916 | 293263.98 | 6131334.58 |
| 25917 | 296394.18 | 6126550.92 |
| 25918 | 295995.41 | 6125765.40 |
| 25919 | 293863.21 | 6126854.29 |
| 25920 | 298802.08 | 6128851.01 |
| 25921 | 294897.19 | 6126090.65 |
| 25922 | 294977.97 | 6127782.43 |
| 25923 | 295148.63 | 6128177.54 |
| 25924 | 294304.23 | 6126428.81 |
| 25925 | 298656.85 | 6128885.19 |
| 25926 | 297725.84 | 6127474.72 |
| 25927 | 295733.25 | 6125845.96 |
| 25928 | 298018.04 | 6127836.50 |
| 25929 | 298113.49 | 6129202.29 |
| 25930 | 296715.48 | 6125875.53 |
| 25931 | 299020.53 | 6128070.70 |
| 25932 | 297014.57 | 6126235.09 |
| 25933 | 294657.71 | 6127571.83 |
| 25934 | 294294.94 | 6125172.97 |
| 25935 | 298583.95 | 6129041.69 |
| 25936 | 298894.05 | 6128981.04 |
| 25937 | 294369.93 | 6125693.28 |
| 25938 | 295857.16 | 6127865.66 |
| 25939 | 294254.76 | 6125412.93 |
| 25940 | 295293.73 | 6126190.56 |
| 25941 | 298251.27 | 6127721.56 |
| 25942 | 297885.98 | 6127652.03 |
| 25943 | 294528.70 | 6125658.44 |
| 25944 | 295787.81 | 6128519.76 |
| 25945 | 296122.26 | 6125594.24 |
| 25946 | 296744.46 | 6128258.01 |

|       |           |            |
|-------|-----------|------------|
| 25947 | 293854.80 | 6124880.93 |
| 25948 | 295867.05 | 6125064.28 |
| 25949 | 295740.93 | 6127042.83 |
| 25950 | 295728.47 | 6127472.22 |
| 25951 | 294327.51 | 6127021.69 |
| 25952 | 293675.51 | 6126572.14 |
| 25953 | 297804.35 | 6127030.90 |
| 25954 | 294369.00 | 6125375.58 |
| 25955 | 295009.35 | 6125256.08 |
| 25956 | 295669.58 | 6125080.85 |
| 25957 | 295751.93 | 6127770.61 |
| 25967 | 293843.72 | 6125420.75 |
| 25972 | 293966.29 | 6125503.37 |
| 26003 | 296715.06 | 6127532.14 |
| 26016 | 294759.22 | 6128046.43 |
| 26018 | 299472.71 | 6129491.02 |
| 26019 | 297313.51 | 6127972.61 |
| 26023 | 297986.77 | 6126195.42 |
| 26027 | 294058.62 | 6126504.30 |
| 26029 | 295025.27 | 6128474.77 |
| 26031 | 297851.03 | 6126384.98 |
| 26032 | 297432.06 | 6127959.69 |
| 26033 | 296990.37 | 6128011.69 |
| 26034 | 294876.61 | 6127947.93 |
| 26035 | 294139.61 | 6127615.04 |
| 26036 | 295940.72 | 6127205.79 |
| 26037 | 294845.88 | 6128273.26 |
| 26038 | 295370.50 | 6128209.55 |
| 26039 | 295875.51 | 6125567.57 |
| 26040 | 294666.86 | 6125923.81 |
| 26041 | 297100.01 | 6126447.61 |
| 26042 | 294829.73 | 6125022.78 |
| 26043 | 297071.58 | 6126595.86 |
| 26044 | 293381.50 | 6126950.41 |
| 26045 | 296985.83 | 6127452.81 |
| 26046 | 296826.25 | 6127413.38 |
| 26047 | 295896.69 | 6128298.48 |
| 26048 | 296562.40 | 6126125.85 |
| 26049 | 294117.35 | 6124685.12 |
| 26050 | 295318.42 | 6125052.56 |
| 26051 | 296666.59 | 6127485.76 |
| 26052 | 295411.55 | 6127390.89 |
| 26053 | 295392.06 | 6126580.99 |
| 26054 | 294616.73 | 6126095.18 |
| 26055 | 294104.55 | 6126842.22 |
| 26056 | 295079.45 | 6126144.28 |
| 26057 | 294104.34 | 6127875.95 |
| 26058 | 294238.18 | 6127207.70 |
| 26059 | 294310.92 | 6127765.21 |
| 26060 | 294213.82 | 6126001.59 |

|       |           |            |
|-------|-----------|------------|
| 26061 | 296317.70 | 6125308.66 |
| 26062 | 295470.80 | 6126708.66 |
| 26063 | 296462.47 | 6125433.15 |
| 26064 | 295579.07 | 6128419.17 |
| 26065 | 294616.75 | 6124825.85 |
| 26066 | 295146.05 | 6128005.28 |
| 26067 | 296026.53 | 6125433.95 |
| 26068 | 294090.66 | 6128019.66 |
| 26069 | 293867.79 | 6125247.82 |
| 26070 | 293996.82 | 6125176.69 |
| 26071 | 297184.14 | 6126896.89 |
| 26072 | 294953.04 | 6128295.59 |
| 26073 | 296851.71 | 6126628.34 |
| 26074 | 298045.07 | 6127486.31 |
| 26075 | 293397.31 | 6126986.24 |
| 26076 | 294667.79 | 6127030.05 |
| 26077 | 297587.39 | 6127582.80 |
| 26078 | 294777.98 | 6124767.44 |
| 26079 | 294562.17 | 6127843.39 |
| 26080 | 293880.50 | 6126511.40 |
| 26081 | 293783.69 | 6127326.97 |
| 26082 | 297686.49 | 6127340.73 |
| 26083 | 297067.82 | 6128687.36 |
| 26084 | 293969.13 | 6127516.92 |
| 26085 | 296203.84 | 6128167.32 |
| 26086 | 295783.35 | 6125075.32 |
| 26087 | 293680.25 | 6127238.16 |
| 26088 | 296126.56 | 6128165.36 |
| 26089 | 294640.92 | 6127693.16 |
| 26090 | 295233.15 | 6127833.64 |
| 26091 | 298076.65 | 6127379.44 |
| 26092 | 295366.80 | 6128513.16 |
| 26093 | 296775.30 | 6126292.00 |
| 26094 | 294855.28 | 6127082.58 |
| 26095 | 296765.71 | 6127517.91 |
| 26096 | 296066.85 | 6125272.31 |
| 26097 | 294506.55 | 6124972.32 |
| 26098 | 296427.17 | 6126076.45 |
| 26099 | 294911.64 | 6125575.23 |
| 26100 | 297311.67 | 6127835.37 |
| 26101 | 294721.52 | 6128390.45 |
| 26102 | 295273.78 | 6126709.52 |
| 26103 | 295323.20 | 6126047.03 |
| 26104 | 296302.88 | 6125639.18 |
| 26105 | 294139.54 | 6127442.01 |
| 26106 | 294849.22 | 6128184.74 |
| 26107 | 295660.20 | 6126345.44 |
| 26108 | 294910.84 | 6127017.09 |
| 26109 | 297248.43 | 6128318.31 |
| 26110 | 294170.95 | 6124840.99 |



|       |           |            |
|-------|-----------|------------|
| 26111 | 295329.25 | 6125984.10 |
| 26112 | 294776.16 | 6127408.47 |
| 26113 | 295641.58 | 6127866.02 |
| 26114 | 297421.56 | 6128278.28 |
| 26115 | 298056.48 | 6127504.51 |
| 26116 | 295214.10 | 6125249.03 |
| 26117 | 295604.80 | 6128483.91 |
| 26118 | 295383.08 | 6127651.36 |
| 26119 | 294640.96 | 6127386.66 |
| 26120 | 296122.71 | 6127067.33 |
| 26121 | 295595.31 | 6127475.44 |
| 26122 | 295100.49 | 6126714.34 |
| 26123 | 298801.03 | 6127960.34 |
| 26124 | 298058.89 | 6127536.55 |
| 26125 | 296074.24 | 6126136.43 |
| 26126 | 294792.53 | 6125629.07 |
| 26127 | 294653.04 | 6124666.02 |
| 26128 | 293264.82 | 6131279.60 |
| 26129 | 294548.51 | 6125072.20 |
| 26130 | 295378.12 | 6125660.67 |
| 26131 | 296605.89 | 6128804.76 |
| 26132 | 294929.44 | 6125374.53 |
| 26133 | 296072.08 | 6125397.20 |
| 26134 | 294406.79 | 6125542.54 |
| 26135 | 299152.83 | 6128264.16 |
| 26136 | 295537.10 | 6126230.22 |
| 26137 | 294162.34 | 6127326.91 |
| 26138 | 296523.25 | 6127377.69 |
| 26139 | 294063.49 | 6124781.66 |
| 26140 | 298746.37 | 6127826.30 |
| 26141 | 294920.94 | 6124868.23 |
| 26142 | 297454.88 | 6126981.92 |
| 26143 | 295929.82 | 6127356.37 |
| 26144 | 296549.44 | 6126342.57 |
| 26145 | 295146.13 | 6127454.33 |
| 26146 | 293579.01 | 6126744.99 |
| 26147 | 296076.25 | 6126289.80 |
| 26148 | 295824.79 | 6128238.65 |
| 26149 | 297825.97 | 6127027.03 |
| 26150 | 294480.39 | 6126004.03 |
| 26151 | 297922.26 | 6127284.72 |
| 26152 | 294477.27 | 6127686.69 |
| 26153 | 295511.57 | 6125545.68 |
| 26154 | 298392.91 | 6127056.88 |
| 26155 | 294836.30 | 6127633.28 |
| 26156 | 293549.98 | 6127435.08 |
| 26157 | 296598.45 | 6128923.45 |
| 26158 | 294818.06 | 6128598.84 |
| 26159 | 296903.97 | 6127396.44 |
| 26160 | 294982.31 | 6128043.13 |

|       |           |            |
|-------|-----------|------------|
| 26161 | 296157.09 | 6125405.98 |
| 26162 | 298280.87 | 6127812.99 |
| 26163 | 296938.09 | 6126362.69 |
| 26164 | 295687.38 | 6128657.50 |
| 26165 | 295058.00 | 6127613.37 |
| 26166 | 294975.90 | 6128559.07 |
| 26167 | 297307.49 | 6128275.10 |
| 26168 | 295396.59 | 6126463.36 |
| 26169 | 294266.79 | 6125516.87 |
| 26170 | 295044.14 | 6124407.46 |
| 26171 | 295035.88 | 6124985.61 |
| 26172 | 294910.15 | 6125959.57 |
| 26173 | 298582.44 | 6128159.25 |
| 26174 | 293864.94 | 6125343.20 |
| 26175 | 295485.20 | 6126471.38 |
| 26176 | 297090.34 | 6127596.11 |
| 26177 | 296209.75 | 6124958.07 |
| 26178 | 294448.70 | 6125241.99 |
| 26179 | 296269.35 | 6127791.24 |
| 26180 | 295050.57 | 6124584.55 |
| 26181 | 294482.45 | 6125200.53 |
| 26182 | 298383.29 | 6128015.95 |
| 26183 | 295736.56 | 6126757.20 |
| 26184 | 294457.76 | 6126992.82 |
| 26185 | 295329.88 | 6127015.06 |
| 26186 | 297457.28 | 6128147.18 |
| 26187 | 296093.34 | 6127817.17 |
| 26188 | 294400.07 | 6126178.84 |
| 26189 | 295772.60 | 6127372.90 |
| 26190 | 294406.47 | 6127532.59 |
| 26191 | 293598.71 | 6126874.68 |
| 26192 | 295221.95 | 6125442.78 |
| 26193 | 293961.49 | 6127219.37 |
| 26194 | 295984.50 | 6128136.75 |
| 26195 | 295855.03 | 6128598.54 |
| 26196 | 293772.98 | 6127672.96 |
| 26197 | 296169.67 | 6127064.95 |
| 26198 | 295398.81 | 6125194.39 |
| 26199 | 295162.88 | 6124886.44 |
| 26200 | 295320.37 | 6127930.20 |
| 26201 | 298820.94 | 6128113.50 |
| 26202 | 298897.51 | 6128343.55 |
| 26203 | 295944.69 | 6128458.07 |
| 26204 | 298631.35 | 6128050.57 |
| 26205 | 296878.41 | 6126499.07 |
| 26206 | 295740.43 | 6127620.61 |
| 26207 | 297550.47 | 6127256.99 |
| 26208 | 293756.02 | 6126867.24 |
| 26209 | 297476.49 | 6127423.33 |
| 26210 | 295029.67 | 6126263.74 |

|       |           |            |
|-------|-----------|------------|
| 26211 | 295666.90 | 6127371.14 |
| 26212 | 297600.70 | 6127399.96 |
| 26213 | 297255.03 | 6126841.37 |
| 26214 | 296030.71 | 6126515.40 |
| 26215 | 296862.44 | 6128730.85 |
| 26216 | 295463.21 | 6128134.77 |
| 26217 | 294828.83 | 6126564.35 |
| 26218 | 294961.62 | 6125109.93 |
| 26219 | 295757.72 | 6128690.65 |
| 26220 | 296882.62 | 6127503.59 |
| 26221 | 295604.71 | 6126606.01 |
| 26222 | 293755.17 | 6124943.90 |
| 26223 | 293963.69 | 6126836.95 |
| 26224 | 298676.85 | 6128210.18 |
| 26225 | 298879.52 | 6128223.34 |
| 26226 | 294106.70 | 6126646.46 |
| 26227 | 293727.04 | 6125078.45 |
| 26228 | 294822.00 | 6125353.55 |
| 26229 | 295928.27 | 6128682.56 |
| 26230 | 294412.34 | 6126436.05 |
| 26231 | 295835.16 | 6127987.27 |
| 26232 | 297883.45 | 6127120.25 |
| 26233 | 294547.36 | 6127306.23 |
| 26234 | 295373.29 | 6124925.50 |
| 26235 | 295336.36 | 6125921.06 |
| 26236 | 295183.13 | 6128504.50 |
| 26237 | 297030.10 | 6128325.91 |
| 26238 | 294659.95 | 6126577.20 |
| 26239 | 295664.26 | 6124946.18 |
| 26240 | 294247.95 | 6126157.62 |
| 26241 | 293854.60 | 6125633.20 |
| 26242 | 296355.48 | 6125711.90 |
| 26243 | 293795.53 | 6125324.61 |
| 26244 | 294389.95 | 6127159.10 |
| 26245 | 296522.34 | 6126716.98 |
| 26246 | 294333.16 | 6124816.05 |
| 26247 | 295127.90 | 6125336.38 |
| 26248 | 296416.95 | 6125825.60 |
| 26249 | 293794.40 | 6125634.64 |
| 26250 | 296491.41 | 6125821.33 |
| 26251 | 293931.23 | 6126950.97 |
| 26252 | 293526.81 | 6125068.24 |
| 26253 | 296811.33 | 6127625.55 |
| 26254 | 297542.80 | 6127097.04 |
| 26255 | 298900.37 | 6128066.36 |
| 26256 | 296688.95 | 6125997.42 |
| 26257 | 297675.74 | 6127156.08 |
| 26258 | 296564.63 | 6127756.74 |
| 26259 | 297121.20 | 6126693.17 |
| 26260 | 293845.03 | 6126709.52 |

|       |           |            |
|-------|-----------|------------|
| 26261 | 296112.88 | 6125804.57 |
| 26262 | 294095.42 | 6125585.22 |
| 26263 | 294047.37 | 6125647.29 |
| 26264 | 295180.15 | 6125935.27 |
| 26265 | 295063.89 | 6126048.99 |
| 26266 | 295644.20 | 6127560.26 |
| 26267 | 294832.21 | 6127738.10 |
| 26268 | 298529.92 | 6127872.40 |
| 26269 | 296538.28 | 6128283.16 |
| 26270 | 295859.40 | 6128114.31 |
| 26271 | 295808.35 | 6126110.02 |
| 26272 | 294358.44 | 6127081.59 |
| 26273 | 293074.89 | 6127027.44 |
| 26274 | 294253.44 | 6127471.23 |
| 26275 | 298771.42 | 6127891.79 |
| 26276 | 295843.59 | 6124822.95 |
| 26277 | 294757.95 | 6127913.77 |
| 26278 | 294956.67 | 6127272.23 |
| 26279 | 295443.60 | 6126055.68 |
| 26280 | 296204.29 | 6128471.63 |
| 26281 | 293559.55 | 6127055.95 |
| 26282 | 295023.73 | 6126396.98 |
| 26283 | 294707.51 | 6125017.21 |
| 26284 | 295524.60 | 6125096.86 |
| 26285 | 296024.05 | 6127824.26 |
| 26286 | 296326.68 | 6126042.51 |
| 26287 | 294929.73 | 6128052.77 |
| 26288 | 295988.90 | 6128673.49 |
| 26289 | 295268.08 | 6126580.74 |
| 26290 | 295086.37 | 6128156.29 |
| 26291 | 295223.63 | 6127009.09 |
| 26292 | 296779.98 | 6128345.96 |
| 26293 | 295813.09 | 6125452.45 |
| 26294 | 294387.06 | 6127611.67 |
| 26295 | 298311.97 | 6127574.69 |
| 26296 | 295983.14 | 6128022.04 |
| 26297 | 295256.09 | 6125268.40 |
| 26298 | 298099.79 | 6127816.26 |
| 26299 | 296509.91 | 6126643.20 |
| 26300 | 298756.84 | 6129077.44 |
| 26301 | 296008.19 | 6128191.70 |
| 26302 | 294007.95 | 6128040.11 |
| 26303 | 298299.31 | 6127885.84 |
| 26304 | 294135.80 | 6124974.56 |
| 26305 | 294140.57 | 6126994.23 |
| 26306 | 298424.42 | 6129044.61 |
| 26307 | 295862.50 | 6127125.87 |
| 26308 | 296632.05 | 6126345.02 |
| 26309 | 296713.28 | 6128004.61 |
| 26310 | 294625.02 | 6125201.53 |

|       |           |            |
|-------|-----------|------------|
| 26311 | 296089.48 | 6126011.63 |
| 26312 | 294966.47 | 6125498.95 |
| 26313 | 298973.26 | 6127540.63 |
| 26465 | 297931.58 | 6127329.25 |
| 26880 | 295796.48 | 6128602.03 |
| 26973 | 294820.16 | 6126676.65 |
| 27013 | 294007.66 | 6127936.13 |
| 27025 | 295708.18 | 6125988.30 |
| 27035 | 293881.32 | 6125683.80 |
| 27038 | 294766.02 | 6125252.65 |
| 27062 | 294105.21 | 6128134.91 |
| 27071 | 296395.36 | 6128212.18 |
| 27076 | 295364.93 | 6126720.51 |
| 27098 | 294935.48 | 6125384.54 |
| 27110 | 295794.37 | 6125198.06 |
| 27111 | 295753.40 | 6125199.57 |
| 27112 | 294181.10 | 6127651.03 |
| 27113 | 295529.78 | 6125207.71 |
| 27115 | 296353.16 | 6127943.03 |
| 27119 | 295307.86 | 6126189.19 |
| 27123 | 293880.25 | 6127127.94 |
| 27140 | 297920.96 | 6127300.83 |
| 27141 | 293684.23 | 6126744.60 |
| 27151 | 295000.90 | 6128306.20 |
| 27195 | 293830.39 | 6126724.41 |
| 27218 | 295984.95 | 6128592.77 |
| 27222 | 294774.90 | 6127447.35 |
| 27223 | 299167.74 | 6127559.55 |
| 27230 | 295365.29 | 6128148.41 |
| 27238 | 295934.87 | 6127356.74 |
| 27250 | 297702.41 | 6127340.87 |
| 27253 | 295980.74 | 6125875.74 |
| 27255 | 294847.79 | 6125023.95 |
| 27256 | 293723.31 | 6125195.54 |
| 27258 | 296149.29 | 6125917.43 |
| 27260 | 293952.82 | 6125297.04 |
| 27269 | 296015.33 | 6125210.55 |
| 27271 | 294421.32 | 6127858.70 |
| 27273 | 293542.20 | 6127062.80 |
| 27278 | 295594.33 | 6128257.31 |
| 27285 | 297227.79 | 6126465.11 |
| 27288 | 298573.98 | 6127224.00 |
| 27290 | 295065.01 | 6127015.33 |
| 27291 | 294762.85 | 6127879.12 |
| 27307 | 294975.28 | 6128042.76 |
| 27315 | 293288.45 | 6131126.14 |
| 27319 | 295354.87 | 6124921.82 |
| 27326 | 297759.52 | 6127370.46 |
| 27348 | 294776.82 | 6127635.03 |
| 27356 | 293654.17 | 6125314.41 |

|       |           |            |
|-------|-----------|------------|
| 27374 | 296147.69 | 6126055.90 |
| 27378 | 295658.62 | 6126350.27 |
| 27381 | 294938.49 | 6126681.84 |
| 27382 | 295101.90 | 6126709.57 |
| 27388 | 298529.64 | 6127992.46 |
| 27389 | 294031.66 | 6125156.99 |
| 27395 | 294581.63 | 6124890.14 |
| 27422 | 297708.95 | 6127372.71 |
| 27423 | 294527.67 | 6126965.17 |
| 27429 | 297454.52 | 6127418.50 |
| 27431 | 295867.78 | 6125160.27 |
| 27433 | 296530.79 | 6127388.46 |
| 27450 | 297845.34 | 6127813.68 |
| 27451 | 295381.69 | 6128273.31 |
| 27453 | 297344.38 | 6126506.60 |
| 27464 | 295687.97 | 6127370.48 |
| 27486 | 293179.13 | 6127374.22 |
| 27492 | 293182.46 | 6127326.61 |
| 27497 | 295041.71 | 6124509.92 |
| 27499 | 297374.79 | 6126509.06 |
| 27504 | 295655.09 | 6125415.46 |
| 27509 | 294768.03 | 6125259.03 |
| 27512 | 296911.54 | 6127394.36 |
| 27518 | 294826.63 | 6125272.01 |
| 27539 | 294771.96 | 6125253.32 |
| 27544 | 295028.28 | 6126268.59 |
| 27562 | 295000.10 | 6125292.87 |
| 27562 | 294999.55 | 6125297.84 |
| 27566 | 298660.30 | 6127954.72 |
| 27567 | 298084.67 | 6127563.51 |
| 27574 | 295072.53 | 6128025.55 |
| 27577 | 296015.99 | 6125455.23 |
| 27581 | 294264.03 | 6125518.93 |
| 27582 | 293943.10 | 6125594.42 |
| 27584 | 297224.89 | 6126478.28 |
| 27587 | 297471.32 | 6127420.41 |
| 27593 | 296522.28 | 6127398.83 |
| 27602 | 294768.50 | 6127266.69 |
| 27612 | 295672.62 | 6126241.80 |
| 27612 | 295673.06 | 6126241.78 |
| 27612 | 295673.43 | 6126241.72 |
| 27612 | 295673.79 | 6126241.63 |
| 27612 | 295674.25 | 6126241.44 |
| 27612 | 295674.68 | 6126241.19 |
| 27612 | 295675.03 | 6126240.93 |
| 27612 | 295675.25 | 6126240.72 |
| 27612 | 295675.46 | 6126240.48 |
| 27612 | 295675.71 | 6126240.13 |
| 27612 | 295675.95 | 6126239.69 |
| 27612 | 295676.09 | 6126239.34 |

|       |           |            |
|-------|-----------|------------|
| 27612 | 295676.17 | 6126239.04 |
| 27612 | 295676.24 | 6126238.61 |
| 27612 | 295676.26 | 6126238.11 |
| 27612 | 295676.20 | 6126237.56 |
| 27612 | 295676.11 | 6126237.19 |
| 27612 | 295676.01 | 6126236.90 |
| 27612 | 295675.88 | 6126236.62 |
| 27612 | 295675.73 | 6126236.34 |
| 27612 | 295675.55 | 6126236.09 |
| 27612 | 295675.31 | 6126235.80 |
| 27612 | 295675.05 | 6126235.54 |
| 27612 | 295674.70 | 6126235.27 |
| 27612 | 295674.27 | 6126235.02 |
| 27612 | 295673.87 | 6126234.85 |
| 27612 | 295673.52 | 6126234.75 |
| 27614 | 294130.25 | 6127763.59 |
| 27618 | 298135.25 | 6127658.98 |
| 27625 | 298900.97 | 6128978.83 |
| 27632 | 295861.20 | 6127602.11 |
| 27633 | 295721.73 | 6127370.68 |
| 27638 | 295396.20 | 6126458.23 |
| 27644 | 296577.38 | 6127419.92 |
| 27644 | 296574.37 | 6127423.22 |
| 27644 | 296573.05 | 6127424.67 |
| 27654 | 294097.42 | 6125234.06 |
| 27665 | 294863.31 | 6126667.39 |
| 27665 | 294862.43 | 6126676.12 |
| 27666 | 295895.71 | 6126462.54 |
| 27672 | 295401.19 | 6128280.28 |
| 27673 | 297815.96 | 6127027.78 |
| 27678 | 294808.99 | 6127281.83 |
| 27690 | 296978.14 | 6127707.55 |
| 27691 | 293959.47 | 6125054.41 |
| 27691 | 293964.66 | 6125051.56 |
| 27692 | 295159.77 | 6128296.43 |
| 27693 | 293759.16 | 6126733.47 |
| 27698 | 293529.59 | 6127962.89 |
| 27702 | 296888.51 | 6128083.58 |
| 27707 | 295979.62 | 6127912.90 |
| 27708 | 296364.74 | 6128052.43 |
| 27712 | 297832.39 | 6126902.53 |
| 27713 | 296991.98 | 6127496.69 |
| 27713 | 296991.81 | 6127495.33 |
| 27713 | 296990.89 | 6127488.12 |
| 27717 | 296850.71 | 6127233.96 |
| 27736 | 296888.64 | 6126327.49 |
| 27749 | 296543.02 | 6125895.24 |
| 27750 | 296778.29 | 6126282.40 |
| 27751 | 296668.60 | 6128392.93 |
| 27758 | 295009.11 | 6127508.29 |

|       |           |            |
|-------|-----------|------------|
| 27759 | 294382.23 | 6127638.53 |
| 27762 | 294466.10 | 6126012.17 |
| 27766 | 294775.70 | 6127273.06 |
| 27767 | 295971.18 | 6127671.52 |
| 27774 | 295530.51 | 6125251.70 |
| 27776 | 295529.49 | 6125412.37 |
| 27780 | 296004.23 | 6125594.02 |
| 27782 | 297924.20 | 6127288.85 |
| 27785 | 296155.44 | 6126043.18 |
| 27795 | 293529.64 | 6126847.65 |
| 27797 | 295661.74 | 6125423.28 |
| 27799 | 293353.56 | 6127312.15 |
| 27800 | 295064.17 | 6126038.97 |
| 27800 | 295064.56 | 6126036.00 |
| 27800 | 295064.69 | 6126035.01 |
| 27802 | 295656.41 | 6126367.54 |
| 27802 | 295657.30 | 6126360.74 |
| 27804 | 295995.45 | 6127992.54 |
| 27806 | 295539.11 | 6127238.05 |
| 27810 | 296201.11 | 6127203.78 |
| 27811 | 293624.31 | 6127544.06 |
| 27813 | 293665.14 | 6126575.43 |
| 27817 | 293815.10 | 6125657.72 |
| 27817 | 293812.56 | 6125659.03 |
| 27824 | 296015.59 | 6124985.55 |
| 27828 | 294743.44 | 6125997.99 |
| 27832 | 297620.69 | 6126853.83 |
| 27848 | 294768.82 | 6124777.45 |
| 27852 | 295529.67 | 6125198.31 |
| 27854 | 296186.95 | 6127213.64 |
| 27857 | 294773.32 | 6127451.20 |
| 27861 | 294536.69 | 6125076.06 |
| 27862 | 294690.38 | 6125028.10 |
| 27865 | 294764.12 | 6127884.59 |
| 27872 | 294727.18 | 6128331.15 |
| 27878 | 299942.31 | 6128227.74 |
| 27880 | 297866.42 | 6127596.17 |
| 27885 | 296728.87 | 6128160.54 |
| 27885 | 296727.69 | 6128154.63 |
| 27890 | 298261.25 | 6127830.65 |
| 27896 | 297827.35 | 6126896.86 |
| 27908 | 295263.57 | 6126430.96 |
| 27910 | 296666.59 | 6127493.98 |
| 27911 | 294931.44 | 6126678.72 |
| 27911 | 294931.14 | 6126685.30 |
| 27913 | 293815.65 | 6125387.38 |
| 27913 | 293809.70 | 6125376.79 |
| 27916 | 293857.50 | 6125640.03 |
| 27917 | 295284.84 | 6128532.22 |
| 27920 | 294346.11 | 6125731.73 |



|       |           |            |
|-------|-----------|------------|
| 27922 | 297766.23 | 6127553.92 |
| 27923 | 293702.37 | 6127060.64 |
| 27924 | 296305.67 | 6125299.62 |
| 27939 | 295652.25 | 6125405.09 |
| 27954 | 298082.34 | 6127548.48 |
| 27959 | 295155.85 | 6126302.98 |
| 27968 | 294511.67 | 6126315.34 |
| 27968 | 294510.40 | 6126312.93 |
| 27969 | 293172.91 | 6127336.59 |
| 27970 | 294251.16 | 6125286.21 |
| 27971 | 293737.96 | 6125412.69 |
| 27972 | 298208.07 | 6127250.68 |
| 27973 | 297858.08 | 6127595.08 |
| 27974 | 293039.82 | 6126949.86 |
| 27975 | 293957.57 | 6125293.22 |
| 27976 | 295040.65 | 6127220.45 |
| 27977 | 294766.85 | 6126339.65 |
| 27978 | 296136.88 | 6127544.15 |
| 27979 | 294740.76 | 6128031.62 |
| 27980 | 295060.61 | 6127045.26 |
| 27981 | 294353.12 | 6126249.12 |
| 27982 | 295201.08 | 6124753.95 |
| 27983 | 296710.31 | 6127725.92 |
| 27984 | 294877.80 | 6128061.96 |
| 27985 | 297342.49 | 6127240.82 |
| 27986 | 295168.78 | 6128286.42 |
| 27987 | 296419.59 | 6128209.33 |
| 27988 | 293416.15 | 6126899.32 |
| 27989 | 294282.23 | 6126559.03 |
| 27990 | 297815.02 | 6126898.29 |
| 27991 | 296758.04 | 6127894.08 |
| 27992 | 295641.24 | 6128122.98 |
| 27993 | 293915.68 | 6125749.31 |
| 27994 | 296722.12 | 6127511.24 |
| 27995 | 295999.74 | 6125730.44 |
| 27996 | 297477.66 | 6127374.13 |
| 27997 | 296627.58 | 6126655.41 |
| 27998 | 296083.01 | 6128424.27 |
| 27999 | 294665.06 | 6127635.39 |
| 28000 | 298931.35 | 6128170.24 |
| 28001 | 295973.19 | 6126992.64 |
| 28002 | 293952.72 | 6125600.12 |
| 28003 | 295395.92 | 6125514.96 |
| 28004 | 297447.97 | 6127212.00 |
| 28005 | 294340.72 | 6125969.47 |
| 28006 | 295225.00 | 6127247.92 |
| 28007 | 297270.60 | 6126763.17 |
| 28008 | 297430.42 | 6126650.82 |
| 28009 | 296238.06 | 6127652.48 |
| 28010 | 295160.84 | 6125083.89 |

|       |           |            |
|-------|-----------|------------|
| 28011 | 297134.89 | 6127760.68 |
| 28012 | 296758.21 | 6128881.83 |
| 28013 | 294895.46 | 6127435.90 |
| 28014 | 294518.99 | 6125603.16 |
| 28015 | 294460.57 | 6127294.30 |
| 28016 | 294390.46 | 6125402.11 |
| 28017 | 294333.38 | 6126953.90 |
| 28018 | 295217.55 | 6125808.10 |
| 28019 | 296887.08 | 6128079.56 |
| 28020 | 297889.63 | 6126062.48 |
| 28021 | 293427.85 | 6131259.30 |
| 28022 | 299578.08 | 6129430.01 |
| 28023 | 297123.98 | 6127994.87 |
| 28025 | 299474.57 | 6129263.24 |
| 28026 | 297008.34 | 6128101.26 |
| 28027 | 299373.28 | 6129321.65 |
| 28028 | 295588.43 | 6126776.82 |
| 28029 | 297269.90 | 6127977.88 |
| 28366 | 296368.78 | 6128051.77 |
| 28366 | 296367.79 | 6128051.93 |
| 29130 | 294775.23 | 6127629.96 |
| 29407 | 295184.84 | 6125933.25 |
| 29408 | 295683.43 | 6125184.87 |
| 29409 | 297690.12 | 6127241.01 |
| 29416 | 296940.26 | 6126348.74 |
| 29430 | 295034.06 | 6127253.53 |
| 29450 | 295994.24 | 6126815.42 |
| 29452 | 297023.60 | 6127364.20 |
| 29472 | 296286.69 | 6128449.05 |
| 29475 | 296708.09 | 6127518.86 |
| 29475 | 296708.55 | 6127527.57 |
| 29475 | 296708.66 | 6127530.11 |
| 29477 | 297927.49 | 6127305.24 |
| 29479 | 297694.42 | 6127340.34 |
| 29481 | 295809.50 | 6128688.67 |
| 29483 | 294267.99 | 6126561.32 |
| 29484 | 295674.53 | 6126227.06 |
| 29484 | 295675.23 | 6126221.65 |
| 29486 | 295832.55 | 6126934.36 |
| 29489 | 296198.62 | 6127220.48 |
| 29493 | 294927.76 | 6128037.18 |
| 29493 | 294928.02 | 6128047.95 |
| 29500 | 294561.10 | 6127853.39 |
| 29503 | 295161.05 | 6125066.43 |
| 29504 | 295506.68 | 6126462.55 |
| 29507 | 295500.23 | 6126472.19 |
| 29527 | 295001.42 | 6125281.05 |
| 29531 | 293186.16 | 6127033.16 |
| 29533 | 294618.87 | 6126119.16 |
| 29538 | 297192.48 | 6127869.98 |

|       |           |            |
|-------|-----------|------------|
| 29543 | 297028.46 | 6127414.71 |
| 29544 | 293191.46 | 6126994.28 |
| 29545 | 295568.70 | 6125971.64 |
| 29547 | 293696.85 | 6125161.78 |
| 29548 | 298184.99 | 6129102.04 |
| 29549 | 298982.96 | 6128943.88 |
| 29550 | 294488.43 | 6125367.42 |
| 29550 | 294484.28 | 6125355.07 |
| 29558 | 293671.48 | 6125107.48 |
| 29561 | 297133.92 | 6128310.11 |
| 29562 | 296025.71 | 6125438.99 |
| 29562 | 296025.93 | 6125443.98 |
| 29567 | 293465.55 | 6127267.50 |
| 29568 | 293296.66 | 6127210.63 |
| 29569 | 294981.61 | 6128311.97 |
| 29576 | 294408.07 | 6124683.32 |
| 29577 | 293380.23 | 6126987.87 |
| 29580 | 296226.12 | 6125391.72 |
| 29581 | 295765.64 | 6126495.57 |
| 29582 | 296010.32 | 6128202.15 |
| 29584 | 295989.41 | 6127887.86 |
| 29586 | 296553.88 | 6127849.04 |
| 29589 | 294097.45 | 6127224.21 |
| 29594 | 294454.56 | 6124663.27 |
| 29596 | 295471.07 | 6125814.71 |
| 29596 | 295469.91 | 6125823.03 |
| 29599 | 296525.94 | 6128808.81 |
| 29599 | 296524.26 | 6128801.19 |
| 29600 | 295162.04 | 6124918.21 |
| 29611 | 296030.23 | 6126528.67 |
| 29613 | 295800.51 | 6128666.53 |
| 29614 | 293709.55 | 6125086.63 |
| 29616 | 298260.75 | 6127836.53 |
| 29617 | 293834.04 | 6125402.95 |
| 29619 | 294294.70 | 6124945.52 |
| 29622 | 294874.60 | 6127084.01 |
| 29628 | 297664.57 | 6127094.72 |
| 29638 | 293545.54 | 6126793.19 |
| 29643 | 294388.09 | 6127674.05 |
| 29644 | 298098.37 | 6129118.70 |
| 29650 | 294450.41 | 6127031.57 |
| 29651 | 298098.33 | 6127575.25 |
| 29656 | 295618.36 | 6125611.50 |
| 29662 | 293375.71 | 6127320.03 |
| 29665 | 297622.40 | 6126863.69 |
| 29667 | 294810.51 | 6127270.77 |
| 29667 | 294811.54 | 6127284.73 |
| 29667 | 294811.76 | 6127287.77 |
| 29668 | 296356.12 | 6128071.94 |
| 29676 | 296874.15 | 6128332.27 |

|       |           |            |
|-------|-----------|------------|
| 29677 | 294902.86 | 6125978.29 |
| 29678 | 295228.98 | 6127840.53 |
| 29684 | 295269.42 | 6126724.41 |
| 29684 | 295274.69 | 6126725.05 |
| 29689 | 295470.15 | 6126719.66 |
| 29691 | 296775.57 | 6128360.01 |
| 29691 | 296780.02 | 6128361.63 |
| 29691 | 296781.64 | 6128371.33 |
| 29692 | 296012.98 | 6126790.80 |
| 29692 | 296017.40 | 6126791.31 |
| 29693 | 293667.83 | 6127208.23 |
| 29693 | 293677.42 | 6127207.78 |
| 29693 | 293676.92 | 6127212.61 |
| 29706 | 294408.63 | 6125394.88 |
| 29712 | 297870.98 | 6127184.53 |
| 29717 | 295925.47 | 6127357.93 |
| 29718 | 295041.28 | 6124513.35 |
| 29718 | 295040.56 | 6124495.16 |
| 29725 | 294649.66 | 6126171.82 |
| 29725 | 294679.67 | 6126165.96 |
| 29725 | 294650.00 | 6126083.13 |
| 29727 | 295471.07 | 6125814.71 |
| 29728 | 295350.28 | 6126857.99 |
| 29735 | 296813.48 | 6126270.49 |
| 29740 | 297128.27 | 6128209.30 |
| 29740 | 297113.52 | 6128204.94 |
| 29741 | 297484.89 | 6127953.10 |
| 29743 | 295040.52 | 6127230.48 |
| 29743 | 295040.00 | 6127234.05 |
| 29744 | 298261.76 | 6127818.98 |
| 29753 | 296004.51 | 6127827.03 |
| 29758 | 296992.58 | 6128015.03 |
| 29761 | 297510.98 | 6127216.06 |
| 29779 | 295063.93 | 6127024.90 |
| 29780 | 298729.96 | 6128999.38 |
| 29780 | 298736.16 | 6128998.13 |
| 29780 | 298742.65 | 6128996.94 |
| 29782 | 295543.20 | 6127202.83 |
| 29785 | 297165.91 | 6128228.02 |
| 29789 | 296580.56 | 6126735.87 |
| 29789 | 296583.79 | 6126718.41 |
| 29806 | 294938.31 | 6125706.46 |
| 29809 | 293984.31 | 6126525.38 |
| 29810 | 295211.20 | 6128396.37 |
| 29814 | 294374.79 | 6127158.68 |
| 29827 | 295949.85 | 6127226.06 |
| 29828 | 295693.68 | 6127378.26 |
| 29831 | 294304.38 | 6126787.36 |
| 29833 | 297386.17 | 6128285.45 |
| 29838 | 294429.15 | 6127004.18 |

|       |           |            |
|-------|-----------|------------|
| 29840 | 296441.27 | 6128422.96 |
| 29843 | 295504.81 | 6128129.92 |
| 29844 | 295253.45 | 6125257.50 |
| 29846 | 298388.55 | 6128928.15 |
| 29855 | 294095.26 | 6127200.24 |
| 29855 | 294095.16 | 6127199.34 |
| 29861 | 295015.59 | 6127562.91 |
| 29863 | 294335.11 | 6125675.12 |
| 29864 | 294033.83 | 6126389.34 |
| 29864 | 294032.41 | 6126383.79 |
| 29865 | 294759.75 | 6125863.06 |
| 29872 | 294707.33 | 6127129.25 |
| 29889 | 295837.47 | 6127003.97 |
| 29899 | 297187.54 | 6128311.20 |
| 29902 | 293546.30 | 6127422.37 |
| 29917 | 297836.88 | 6126907.59 |
| 29918 | 295435.21 | 6126059.10 |
| 29918 | 295441.99 | 6126060.37 |
| 29924 | 298604.77 | 6129146.45 |
| 29928 | 296790.14 | 6126276.40 |
| 29928 | 296780.29 | 6126272.61 |
| 29928 | 296779.80 | 6126275.00 |
| 29934 | 294153.09 | 6127649.85 |
| 29934 | 294181.21 | 6127645.43 |
| 29938 | 295161.99 | 6125049.43 |
| 29939 | 294371.79 | 6125386.11 |
| 29948 | 297166.59 | 6126470.97 |
| 29952 | 295299.23 | 6127916.86 |
| 29966 | 298405.70 | 6129014.46 |
| 29968 | 297477.98 | 6127424.71 |
| 29969 | 295741.04 | 6124938.10 |
| 29970 | 295835.06 | 6125873.52 |
| 29971 | 296738.58 | 6127521.72 |
| 29979 | 293708.47 | 6127049.65 |
| 29983 | 293945.32 | 6127977.55 |
| 29989 | 293707.79 | 6127063.87 |
| 29989 | 293694.45 | 6127064.54 |
| 29994 | 294414.06 | 6125053.59 |
| 30006 | 295482.99 | 6126078.31 |
| 30008 | 295157.97 | 6125097.86 |
| 30023 | 297045.29 | 6128211.64 |
| 30029 | 297105.42 | 6126424.74 |
| 30040 | 296585.23 | 6126739.04 |
| 30043 | 293207.74 | 6126895.87 |
| 30050 | 294259.29 | 6125428.03 |
| 30064 | 293794.86 | 6127967.41 |
| 30082 | 293368.62 | 6127079.02 |
| 30085 | 293499.50 | 6125201.94 |
| 30086 | 296395.03 | 6127931.25 |
| 30087 | 299449.28 | 6129505.74 |

|       |           |            |
|-------|-----------|------------|
| 30093 | 294241.31 | 6126132.38 |
| 30101 | 293864.58 | 6127895.81 |
| 30123 | 298527.44 | 6128239.48 |
| 30138 | 294766.89 | 6125795.64 |
| 30141 | 297821.43 | 6127048.74 |
| 30142 | 293780.36 | 6125159.95 |
| 30143 | 293686.40 | 6127169.55 |
| 30149 | 294102.84 | 6126825.48 |
| 30153 | 295825.80 | 6128299.68 |
| 30153 | 295823.26 | 6128276.01 |
| 30183 | 298485.35 | 6129057.41 |
| 30186 | 298684.80 | 6129019.72 |
| 30188 | 295377.02 | 6124992.22 |
| 30207 | 297250.20 | 6126470.03 |
| 30210 | 295752.57 | 6127218.96 |
| 30213 | 298192.71 | 6128965.16 |
| 30214 | 298025.83 | 6129144.26 |
| 30216 | 295590.84 | 6126766.95 |
| 30227 | 298505.55 | 6129157.99 |
| 30235 | 293030.07 | 6126942.31 |
| 30235 | 293030.17 | 6126947.27 |
| 30240 | 297308.87 | 6128154.19 |
| 30243 | 296980.95 | 6127407.54 |
| 30247 | 294730.71 | 6128335.70 |
| 30247 | 294731.46 | 6128328.74 |
| 30257 | 294427.13 | 6125423.76 |
| 30260 | 294635.30 | 6127573.59 |
| 30261 | 296020.65 | 6128278.06 |
| 30263 | 296661.48 | 6128264.65 |
| 30264 | 295763.46 | 6125840.69 |
| 30267 | 294182.98 | 6125420.48 |
| 30271 | 297294.06 | 6128079.57 |
| 30272 | 298288.77 | 6127964.23 |
| 30272 | 298299.28 | 6127981.60 |
| 30276 | 295161.72 | 6124945.73 |
| 30278 | 298381.18 | 6128050.28 |
| 30279 | 293517.01 | 6127278.15 |
| 30302 | 298234.71 | 6128957.22 |
| 30303 | 295829.31 | 6127169.36 |
| 30306 | 297018.62 | 6127358.61 |
| 30306 | 297009.04 | 6127360.18 |
| 30307 | 293861.22 | 6124876.61 |
| 30313 | 294538.19 | 6125534.31 |
| 30313 | 294548.42 | 6125565.02 |
| 30316 | 295859.50 | 6127966.48 |
| 30316 | 295893.44 | 6127963.50 |
| 30324 | 295938.28 | 6127959.69 |
| 30324 | 295981.82 | 6127967.26 |
| 30333 | 296438.54 | 6127786.62 |
| 30333 | 296438.54 | 6127789.82 |

|       |           |            |
|-------|-----------|------------|
| 30333 | 296438.55 | 6127798.99 |
| 30333 | 296438.55 | 6127805.53 |
| 30342 | 296258.02 | 6125460.64 |
| 30343 | 296708.55 | 6127527.57 |
| 30343 | 296704.24 | 6127526.65 |
| 30343 | 296688.74 | 6127522.62 |
| 30348 | 295990.24 | 6124937.93 |
| 30349 | 295737.84 | 6128308.02 |
| 30349 | 295744.67 | 6128307.77 |
| 30351 | 297480.70 | 6128140.03 |
| 30352 | 296771.75 | 6127513.28 |
| 30354 | 298700.65 | 6129135.48 |
| 30354 | 298704.27 | 6129135.01 |
| 30356 | 298239.19 | 6129040.84 |
| 30384 | 297520.40 | 6128310.11 |
| 30384 | 297486.75 | 6128319.92 |
| 30387 | 293908.30 | 6126538.60 |
| 30393 | 294144.47 | 6124674.90 |
| 30395 | 295476.64 | 6125367.40 |
| 30395 | 295480.29 | 6125334.50 |
| 30395 | 295461.44 | 6125332.08 |
| 30397 | 294224.90 | 6127475.13 |
| 30398 | 295780.09 | 6128521.22 |
| 30404 | 293552.30 | 6126863.61 |
| 30404 | 293554.46 | 6126852.34 |
| 30404 | 293552.06 | 6126851.71 |
| 30408 | 295870.21 | 6127166.26 |
| 30411 | 298183.33 | 6128039.46 |
| 30411 | 298190.11 | 6128045.93 |
| 30411 | 298201.23 | 6128051.92 |
| 30428 | 293757.20 | 6126736.49 |
| 30428 | 293756.61 | 6126731.41 |
| 30434 | 293955.22 | 6127160.07 |
| 30440 | 296002.14 | 6124968.22 |
| 30442 | 295012.14 | 6126408.64 |
| 30445 | 293676.28 | 6126875.23 |
| 30446 | 295293.83 | 6128385.13 |
| 30450 | 295134.41 | 6125271.65 |
| 30451 | 293837.35 | 6125129.20 |
| 30479 | 294500.01 | 6127855.46 |
| 30487 | 294947.60 | 6124497.78 |
| 30488 | 294706.85 | 6127175.14 |
| 30502 | 295629.09 | 6128244.05 |
| 30503 | 293898.20 | 6126848.39 |
| 30515 | 294726.16 | 6126108.56 |
| 30524 | 298762.79 | 6128102.02 |
| 30524 | 298769.51 | 6128125.82 |
| 30539 | 299000.16 | 6128936.85 |
| 30539 | 299001.74 | 6128936.53 |
| 30539 | 299003.31 | 6128936.15 |

|       |           |            |
|-------|-----------|------------|
| 30539 | 299004.87 | 6128935.72 |
| 30539 | 299006.41 | 6128935.25 |
| 30543 | 296561.78 | 6128404.69 |
| 30549 | 295153.54 | 6125131.18 |
| 30549 | 295150.19 | 6125153.14 |
| 30550 | 293731.93 | 6125186.80 |
| 30552 | 295175.19 | 6128380.52 |
| 30572 | 293898.10 | 6125326.72 |
| 30576 | 299416.43 | 6129295.59 |
| 30588 | 294863.36 | 6124730.34 |
| 30591 | 294787.99 | 6125417.69 |
| 30591 | 294796.84 | 6125414.49 |
| 30593 | 298239.55 | 6127796.23 |
| 30593 | 298251.10 | 6127815.21 |
| 30594 | 293197.13 | 6126827.14 |
| 30594 | 293200.24 | 6126827.34 |
| 30604 | 296803.55 | 6127511.22 |
| 30606 | 297669.23 | 6126718.74 |
| 30608 | 293831.50 | 6125020.79 |
| 30609 | 294945.25 | 6128565.26 |
| 30609 | 294945.27 | 6128565.58 |
| 30609 | 294946.01 | 6128575.39 |
| 30609 | 294946.06 | 6128576.12 |
| 30611 | 297904.01 | 6127203.07 |
| 30615 | 293878.66 | 6125106.50 |
| 30617 | 298885.25 | 6128298.39 |
| 30618 | 299014.45 | 6128259.67 |
| 30622 | 299019.23 | 6128275.04 |
| 30624 | 298889.89 | 6128314.05 |
| 30630 | 299164.69 | 6128279.77 |
| 30637 | 294577.39 | 6124844.45 |
| 30644 | 293846.01 | 6127038.88 |
| 30647 | 295250.72 | 6128382.51 |
| 30647 | 295251.96 | 6128395.41 |
| 30648 | 296140.33 | 6128094.79 |
| 30650 | 296152.11 | 6128496.37 |
| 30657 | 298976.99 | 6128941.23 |
| 30662 | 295820.68 | 6126060.89 |
| 30664 | 296345.10 | 6126255.42 |
| 30675 | 296047.02 | 6128511.95 |
| 30675 | 296028.06 | 6128514.18 |
| 30675 | 296022.20 | 6128514.91 |
| 30675 | 296017.42 | 6128515.49 |
| 30678 | 298335.74 | 6127780.87 |
| 30679 | 296108.12 | 6128503.19 |
| 30683 | 296003.40 | 6128142.80 |
| 30683 | 296004.47 | 6128151.22 |
| 30688 | 295824.95 | 6127904.54 |
| 30691 | 297418.43 | 6126920.84 |
| 30691 | 297443.81 | 6126926.63 |



|       |           |            |
|-------|-----------|------------|
| 30696 | 293786.36 | 6128098.32 |
| 30697 | 293237.71 | 6127092.70 |
| 30700 | 294832.19 | 6126678.90 |
| 30700 | 294832.49 | 6126675.93 |
| 30703 | 294460.76 | 6127007.45 |
| 30703 | 294449.01 | 6127013.43 |
| 30710 | 298548.13 | 6127709.02 |
| 30710 | 298533.87 | 6127714.21 |
| 30713 | 295433.65 | 6128280.62 |
| 30713 | 295411.96 | 6128280.55 |
| 30713 | 295407.31 | 6128280.90 |
| 30718 | 293201.12 | 6127035.37 |
| 30719 | 296537.67 | 6125820.52 |
| 30730 | 295910.98 | 6127163.16 |
| 30735 | 297254.25 | 6127978.73 |
| 30743 | 297757.99 | 6126818.73 |
| 30744 | 293498.70 | 6127245.40 |
| 30744 | 293498.90 | 6127251.43 |
| 30745 | 296454.80 | 6125824.48 |
| 30745 | 296482.14 | 6125822.87 |
| 30746 | 296183.27 | 6128491.84 |
| 30746 | 296189.96 | 6128490.64 |
| 30748 | 297432.68 | 6128140.53 |
| 30748 | 297410.63 | 6128133.07 |
| 30752 | 297296.14 | 6126263.67 |
| 30754 | 296047.99 | 6125751.14 |
| 30756 | 295375.35 | 6124954.49 |
| 30759 | 294155.67 | 6126114.49 |
| 30767 | 295207.39 | 6124870.02 |
| 30784 | 293124.98 | 6126945.71 |
| 30792 | 295869.44 | 6127706.12 |
| 30793 | 294959.95 | 6125179.67 |
| 30799 | 295271.90 | 6128285.72 |
| 30799 | 295275.51 | 6128301.85 |
| 30799 | 295280.60 | 6128315.83 |
| 30800 | 293715.89 | 6124964.38 |
| 30802 | 293747.61 | 6127979.53 |
| 30808 | 299126.06 | 6128224.60 |
| 30815 | 295745.16 | 6127668.52 |
| 30820 | 295865.78 | 6127662.57 |
| 30831 | 297405.18 | 6128170.43 |
| 30831 | 297422.46 | 6128154.75 |
| 30854 | 294323.15 | 6124807.99 |
| 30874 | 295686.13 | 6127557.62 |
| 30875 | 295529.25 | 6125185.72 |
| 30876 | 296819.24 | 6127529.07 |
| 30877 | 293677.77 | 6127205.99 |
| 30880 | 295670.48 | 6125175.87 |
| 30887 | 294420.51 | 6124783.17 |
| 30887 | 294430.43 | 6124779.51 |

|       |           |            |
|-------|-----------|------------|
| 30890 | 294424.31 | 6126535.01 |
| 30898 | 293994.48 | 6127929.62 |
| 30900 | 295545.34 | 6125265.70 |
| 30902 | 298503.10 | 6127724.83 |
| 30906 | 299012.35 | 6129099.40 |
| 30907 | 294468.78 | 6124888.44 |
| 30909 | 294391.87 | 6124964.61 |
| 30910 | 295328.97 | 6125975.76 |
| 30910 | 295332.25 | 6125949.80 |
| 30911 | 294424.93 | 6127665.64 |
| 30911 | 294424.93 | 6127657.48 |
| 30911 | 294392.06 | 6127658.95 |
| 30912 | 295867.02 | 6125294.57 |
| 30914 | 295295.98 | 6125364.85 |
| 30921 | 294188.50 | 6125938.75 |
| 30925 | 294661.12 | 6125310.51 |
| 30929 | 299058.13 | 6128449.48 |
| 30929 | 299060.03 | 6128421.74 |
| 30931 | 293677.64 | 6125342.45 |
| 30932 | 298251.98 | 6129101.52 |
| 30933 | 298222.59 | 6128968.81 |
| 30935 | 294237.06 | 6126087.94 |
| 30939 | 298264.29 | 6129185.85 |
| 30940 | 299030.49 | 6128069.47 |
| 30943 | 297388.64 | 6127137.33 |
| 30950 | 295952.67 | 6127195.70 |
| 30955 | 298559.08 | 6128904.69 |
| 30955 | 298573.18 | 6128902.17 |
| 30964 | 295423.02 | 6124951.32 |
| 30964 | 295424.80 | 6124988.67 |
| 30965 | 295531.70 | 6125394.11 |
| 30970 | 293903.31 | 6127803.43 |
| 30972 | 297876.52 | 6127108.81 |
| 30974 | 293596.84 | 6128075.46 |
| 30980 | 294779.86 | 6127444.80 |
| 30989 | 296962.69 | 6128334.68 |
| 31006 | 296849.49 | 6127723.34 |
| 31012 | 294709.92 | 6124849.98 |
| 31019 | 293885.50 | 6127032.73 |
| 31019 | 293904.08 | 6127024.23 |
| 31019 | 293912.93 | 6127020.19 |
| 31022 | 296833.76 | 6127624.18 |
| 31025 | 297915.48 | 6127300.35 |
| 31027 | 293951.40 | 6127790.06 |
| 31028 | 295869.24 | 6125375.03 |
| 31030 | 294811.36 | 6125853.65 |
| 31032 | 298717.88 | 6128865.91 |
| 31035 | 294075.40 | 6126499.71 |
| 31035 | 294074.93 | 6126497.94 |
| 31041 | 296062.14 | 6128510.15 |

|       |           |            |
|-------|-----------|------------|
| 31042 | 294765.50 | 6127999.04 |
| 31053 | 295841.73 | 6128306.46 |
| 31058 | 295305.38 | 6127922.61 |
| 31058 | 295303.84 | 6127921.17 |
| 31060 | 296983.76 | 6127714.54 |
| 31062 | 293685.78 | 6126731.82 |
| 31064 | 298959.59 | 6128820.23 |
| 31075 | 293713.57 | 6127843.88 |
| 31077 | 296003.86 | 6128108.97 |
| 31083 | 294743.89 | 6125495.53 |
| 31083 | 294781.60 | 6125500.12 |
| 31085 | 298733.97 | 6127975.97 |
| 31085 | 298736.98 | 6127976.28 |
| 31088 | 298163.64 | 6127711.40 |
| 31090 | 297621.28 | 6126726.95 |
| 31092 | 293850.78 | 6127881.22 |
| 31095 | 296403.44 | 6126090.79 |
| 31095 | 296405.38 | 6126113.28 |
| 31096 | 294737.32 | 6126288.43 |
| 31096 | 294732.32 | 6126288.43 |
| 31104 | 294734.84 | 6126835.53 |
| 31106 | 294902.15 | 6126682.82 |
| 31108 | 296888.26 | 6128133.31 |
| 31110 | 295766.86 | 6124937.07 |
| 31115 | 294928.98 | 6125724.62 |
| 31117 | 294316.98 | 6126962.03 |
| 31118 | 293938.55 | 6127005.83 |
| 31133 | 294900.92 | 6124954.65 |
| 31134 | 293984.85 | 6125680.91 |
| 31138 | 294136.63 | 6128171.66 |
| 31143 | 294972.87 | 6124866.57 |
| 31144 | 297462.36 | 6127271.42 |
| 31146 | 297511.76 | 6127305.62 |
| 31164 | 293170.30 | 6127018.31 |
| 31165 | 297344.25 | 6127854.79 |
| 31183 | 295969.72 | 6127727.74 |
| 31185 | 296674.55 | 6128902.59 |
| 31188 | 294139.78 | 6127650.27 |
| 31192 | 295384.65 | 6125660.53 |
| 31209 | 295706.26 | 6128193.20 |
| 31215 | 295914.48 | 6124972.69 |
| 31222 | 294901.27 | 6124834.99 |
| 31227 | 294778.38 | 6127864.13 |
| 31227 | 294777.74 | 6127883.56 |
| 31233 | 296733.37 | 6128378.70 |
| 31239 | 294533.76 | 6127758.81 |
| 31240 | 296649.50 | 6128386.10 |
| 31242 | 294676.05 | 6125134.44 |
| 31246 | 294894.57 | 6128059.24 |
| 31248 | 293509.41 | 6127070.29 |

|       |           |            |
|-------|-----------|------------|
| 31249 | 296542.21 | 6127401.48 |
| 31249 | 296561.81 | 6127409.46 |
| 31251 | 294774.81 | 6125731.73 |
| 31252 | 294990.70 | 6125296.89 |
| 31253 | 296023.40 | 6125284.12 |
| 31256 | 294471.86 | 6127665.14 |
| 31256 | 294471.70 | 6127672.21 |
| 31258 | 295222.33 | 6125308.18 |
| 31261 | 293717.85 | 6125209.27 |
| 31264 | 297307.20 | 6127654.10 |
| 31264 | 297320.96 | 6127651.17 |
| 31269 | 298184.10 | 6128028.48 |
| 31278 | 297696.76 | 6127249.58 |
| 31282 | 297678.23 | 6127146.50 |
| 31286 | 295017.30 | 6125076.19 |
| 31287 | 298230.77 | 6127811.93 |
| 31292 | 293774.24 | 6125393.43 |
| 31297 | 294760.88 | 6127274.01 |
| 31297 | 294775.70 | 6127273.06 |
| 31298 | 294810.51 | 6127270.77 |
| 31304 | 295578.58 | 6128145.91 |
| 31307 | 297449.25 | 6127433.82 |
| 31307 | 297455.41 | 6127439.00 |
| 31308 | 294762.75 | 6125244.61 |
| 31308 | 294762.30 | 6125243.32 |
| 31309 | 295245.34 | 6124980.82 |
| 31314 | 296738.05 | 6128253.88 |
| 31318 | 297197.95 | 6128300.06 |
| 31319 | 294306.05 | 6126444.49 |
| 31320 | 295331.29 | 6125939.58 |
| 31322 | 297170.98 | 6128228.04 |
| 31322 | 297178.01 | 6128225.94 |
| 31322 | 297179.84 | 6128225.42 |
| 31325 | 294180.91 | 6124661.14 |
| 31341 | 298796.30 | 6128851.09 |
| 31360 | 294298.15 | 6125160.64 |
| 31363 | 298818.76 | 6128971.14 |
| 31384 | 294321.07 | 6125424.67 |
| 31386 | 294168.30 | 6125208.12 |
| 31389 | 294103.24 | 6124689.56 |
| 31392 | 293474.39 | 6126834.81 |
| 31395 | 299136.72 | 6128240.82 |
| 31395 | 299141.56 | 6128247.70 |
| 31397 | 293515.26 | 6126896.85 |
| 31398 | 298615.89 | 6128973.72 |
| 31402 | 294569.90 | 6124857.33 |
| 31422 | 294071.42 | 6125369.42 |
| 31426 | 293678.77 | 6126732.75 |
| 31435 | 294270.13 | 6126286.01 |
| 31438 | 297247.66 | 6128386.95 |

|       |           |            |
|-------|-----------|------------|
| 31438 | 297286.46 | 6128375.63 |
| 31439 | 294317.26 | 6127595.26 |
| 31442 | 294254.58 | 6126220.35 |
| 31447 | 299517.44 | 6129466.27 |
| 31456 | 295292.13 | 6128372.25 |
| 31457 | 295022.62 | 6128038.51 |
| 31458 | 295245.36 | 6124945.72 |
| 31458 | 295244.90 | 6124932.94 |
| 31459 | 298502.18 | 6128179.54 |
| 31461 | 297002.42 | 6127496.46 |
| 31462 | 295527.80 | 6127220.56 |
| 31464 | 297303.35 | 6127972.92 |
| 31469 | 294686.24 | 6126571.24 |
| 31472 | 296108.65 | 6126293.75 |
| 31473 | 296429.72 | 6126518.50 |
| 31473 | 296411.04 | 6126568.05 |
| 31475 | 296883.77 | 6128038.89 |
| 31479 | 296282.80 | 6128169.49 |
| 31481 | 297419.24 | 6128338.90 |
| 31481 | 297458.51 | 6128327.44 |
| 31487 | 297901.27 | 6127213.38 |
| 31497 | 294296.44 | 6126391.44 |
| 31503 | 297141.82 | 6128092.71 |
| 31509 | 294054.89 | 6125547.04 |
| 31511 | 294799.46 | 6125502.30 |
| 31512 | 294099.96 | 6125525.11 |
| 31512 | 294103.49 | 6125532.42 |
| 31512 | 294109.99 | 6125529.61 |
| 31522 | 294817.63 | 6126677.54 |
| 31522 | 294818.32 | 6126666.80 |
| 31524 | 296459.08 | 6128297.55 |
| 31524 | 296471.78 | 6128291.81 |
| 31529 | 294833.24 | 6128490.85 |
| 31530 | 293941.74 | 6126539.66 |
| 31531 | 293615.19 | 6125205.55 |
| 31534 | 297350.43 | 6127153.07 |
| 31541 | 297450.01 | 6127229.11 |
| 31543 | 295356.09 | 6127967.29 |
| 31550 | 298855.93 | 6128205.87 |
| 31553 | 294178.08 | 6125332.91 |
| 31556 | 294209.10 | 6125454.28 |
| 31556 | 294219.85 | 6125473.96 |
| 31557 | 296551.82 | 6126068.52 |
| 31559 | 298108.03 | 6128003.19 |
| 31559 | 298117.18 | 6128012.68 |
| 31559 | 298125.51 | 6128015.42 |
| 31559 | 298169.21 | 6128027.28 |
| 31561 | 296992.55 | 6127850.86 |
| 31563 | 297486.25 | 6128231.05 |
| 31564 | 294761.67 | 6128049.54 |

|       |           |            |
|-------|-----------|------------|
| 31569 | 294555.39 | 6127027.45 |
| 31569 | 294554.47 | 6126980.39 |
| 31569 | 294546.81 | 6126977.75 |
| 31569 | 294531.01 | 6126986.41 |
| 31570 | 297433.67 | 6127141.08 |
| 31570 | 297434.45 | 6127124.91 |
| 31573 | 294247.14 | 6124726.54 |
| 31575 | 297188.45 | 6127787.73 |
| 31575 | 297192.92 | 6127827.17 |
| 31580 | 294003.98 | 6125396.40 |
| 31580 | 293977.93 | 6125346.01 |
| 31582 | 294577.30 | 6125217.53 |
| 31583 | 294423.51 | 6126484.08 |
| 31583 | 294413.20 | 6126443.81 |
| 31586 | 297212.96 | 6127743.43 |
| 31591 | 295363.24 | 6126632.78 |
| 31592 | 294788.69 | 6124928.15 |
| 31598 | 294826.33 | 6126602.77 |
| 31598 | 294821.66 | 6126643.86 |
| 31598 | 294820.45 | 6126662.26 |
| 31598 | 294820.42 | 6126663.65 |
| 31598 | 294820.41 | 6126663.91 |
| 31601 | 297819.78 | 6126577.77 |
| 31601 | 297807.93 | 6126573.96 |
| 31601 | 297786.36 | 6126555.27 |
| 31602 | 295323.30 | 6126439.62 |
| 31604 | 295686.64 | 6126137.22 |
| 31604 | 295689.26 | 6126121.55 |
| 31605 | 294804.17 | 6124988.67 |
| 31607 | 294801.03 | 6124766.67 |
| 31610 | 294827.94 | 6125259.96 |
| 31614 | 295169.68 | 6128387.79 |
| 31617 | 297905.79 | 6126161.68 |
| 31617 | 297900.53 | 6126160.51 |
| 31618 | 293872.51 | 6127027.30 |
| 31618 | 293897.97 | 6127015.17 |
| 31618 | 293897.50 | 6127002.30 |
| 31618 | 293895.79 | 6126963.20 |
| 31618 | 293894.83 | 6126946.52 |
| 31621 | 295777.80 | 6125714.78 |
| 31622 | 294880.22 | 6126008.28 |
| 31622 | 294880.16 | 6126008.80 |
| 31623 | 297735.97 | 6127230.33 |
| 31624 | 295897.54 | 6126392.63 |
| 31626 | 293495.32 | 6125129.18 |
| 31626 | 293507.45 | 6125151.41 |
| 31626 | 293523.31 | 6125180.50 |
| 31627 | 296427.22 | 6126461.46 |
| 31629 | 296562.88 | 6125980.42 |
| 31629 | 296558.14 | 6125932.13 |

|       |           |            |
|-------|-----------|------------|
| 31630 | 293520.48 | 6125098.96 |
| 31630 | 293534.27 | 6125124.75 |
| 31630 | 293553.17 | 6125159.49 |
| 31631 | 294219.07 | 6125319.84 |
| 31633 | 294491.33 | 6124919.93 |
| 31634 | 294820.96 | 6127420.91 |
| 31634 | 294820.73 | 6127398.25 |
| 31634 | 294819.51 | 6127362.05 |
| 31634 | 294848.60 | 6127359.84 |
| 31638 | 294462.13 | 6124829.60 |
| 31641 | 296638.40 | 6128177.98 |
| 31648 | 293754.05 | 6127023.37 |
| 31648 | 293752.16 | 6126987.46 |
| 31649 | 293740.63 | 6125539.50 |
| 31651 | 295398.91 | 6125316.08 |
| 31651 | 295401.33 | 6125357.17 |
| 31652 | 293961.19 | 6128032.22 |
| 31653 | 298136.16 | 6126759.71 |
| 31653 | 298148.82 | 6126748.58 |
| 31654 | 295382.45 | 6125802.15 |
| 31658 | 295672.22 | 6126244.92 |
| 31659 | 294919.22 | 6125522.08 |
| 31662 | 293960.59 | 6126444.53 |
| 31665 | 294547.70 | 6125077.48 |
| 31665 | 294594.51 | 6125061.41 |
| 31667 | 294816.95 | 6128186.70 |
| 31667 | 294771.47 | 6128189.84 |
| 31667 | 294763.42 | 6128190.40 |
| 31672 | 296415.28 | 6128305.97 |
| 31672 | 296413.04 | 6128292.93 |
| 31672 | 296408.32 | 6128290.14 |
| 31672 | 296407.07 | 6128289.41 |
| 31673 | 295226.93 | 6127035.65 |
| 31676 | 294791.44 | 6127953.80 |
| 31676 | 294814.85 | 6127952.14 |
| 31677 | 294777.20 | 6127568.87 |
| 31679 | 297682.90 | 6127342.38 |
| 31680 | 296271.87 | 6127800.80 |
| 31681 | 296437.73 | 6127820.38 |
| 31681 | 296369.68 | 6127827.25 |
| 31682 | 295609.02 | 6126743.84 |
| 31685 | 295693.74 | 6126088.84 |
| 31685 | 295694.67 | 6126083.03 |
| 31685 | 295702.40 | 6126029.08 |
| 31686 | 295215.25 | 6127311.53 |
| 31686 | 295218.25 | 6127354.65 |
| 31688 | 294246.23 | 6127570.32 |
| 31688 | 294246.86 | 6127546.48 |
| 31688 | 294247.65 | 6127530.76 |
| 31688 | 294247.62 | 6127529.16 |

|       |           |            |
|-------|-----------|------------|
| 31688 | 294247.50 | 6127523.95 |
| 31688 | 294248.13 | 6127501.62 |
| 31691 | 294699.30 | 6126554.11 |
| 31691 | 294695.04 | 6126525.65 |
| 31691 | 294694.48 | 6126513.22 |
| 31691 | 294702.22 | 6126461.48 |
| 31692 | 293713.50 | 6127030.21 |
| 31692 | 293711.98 | 6126991.38 |
| 31695 | 294736.44 | 6125567.30 |
| 31695 | 294738.50 | 6125544.10 |
| 31696 | 293790.03 | 6127022.32 |
| 31696 | 293788.14 | 6126986.41 |
| 31697 | 293826.01 | 6127021.26 |
| 31697 | 293824.12 | 6126985.36 |
| 31701 | 293536.38 | 6125061.87 |
| 31701 | 293541.47 | 6125070.71 |
| 31701 | 293556.88 | 6125098.59 |
| 31701 | 293569.02 | 6125120.67 |
| 31705 | 294775.87 | 6126751.60 |
| 31705 | 294791.44 | 6126713.21 |
| 31705 | 294795.61 | 6126703.49 |
| 31705 | 294810.37 | 6126704.06 |
| 31706 | 295171.10 | 6126165.55 |
| 31706 | 295176.03 | 6126121.08 |
| 31708 | 294697.52 | 6126364.10 |
| 31708 | 294697.81 | 6126363.52 |
| 31710 | 296078.97 | 6127203.78 |
| 31713 | 295679.27 | 6128060.42 |
| 31713 | 295634.14 | 6128066.15 |
| 31714 | 295084.38 | 6126115.79 |
| 31714 | 295093.21 | 6126050.11 |
| 31716 | 295312.64 | 6126192.20 |
| 31716 | 295363.29 | 6126199.78 |
| 31718 | 297085.80 | 6127772.44 |
| 31719 | 298256.87 | 6128080.49 |
| 31719 | 298263.50 | 6128087.98 |
| 31719 | 298285.14 | 6128113.55 |
| 31719 | 298322.09 | 6128089.35 |
| 31720 | 297486.04 | 6127377.70 |
| 31736 | 296976.85 | 6128006.95 |
| 31736 | 296988.46 | 6128003.04 |
| 31738 | 296214.83 | 6125366.60 |
| 31738 | 296201.98 | 6125350.12 |
| 31739 | 294467.59 | 6125296.70 |
| 31741 | 295967.57 | 6125727.89 |
| 31742 | 297057.69 | 6126674.66 |
| 31742 | 297117.75 | 6126704.34 |
| 31743 | 296325.77 | 6126016.08 |
| 31743 | 296316.50 | 6125948.18 |
| 31745 | 295030.30 | 6126244.44 |



|       |           |            |
|-------|-----------|------------|
| 31745 | 295036.53 | 6126205.57 |
| 31745 | 295044.44 | 6126175.03 |
| 31746 | 295326.59 | 6126068.33 |
| 31746 | 295395.65 | 6126077.17 |
| 31747 | 295269.19 | 6124925.09 |
| 31747 | 295346.84 | 6124922.07 |
| 31748 | 295296.83 | 6126296.36 |
| 31748 | 295300.59 | 6126260.59 |
| 31749 | 294699.78 | 6127087.51 |
| 31750 | 293675.84 | 6127323.08 |
| 31751 | 295533.84 | 6126261.01 |
| 31751 | 295525.24 | 6126328.40 |
| 31752 | 295266.99 | 6125232.20 |
| 31754 | 294756.82 | 6127518.39 |
| 31755 | 293281.86 | 6126939.83 |
| 31755 | 293286.67 | 6126937.76 |
| 31755 | 293292.60 | 6126941.41 |
| 31755 | 293368.08 | 6126988.00 |
| 31756 | 294804.12 | 6126241.78 |
| 31758 | 293741.12 | 6125425.26 |
| 31760 | 295017.70 | 6125114.57 |
| 31761 | 294709.30 | 6127571.13 |
| 31761 | 294751.19 | 6127569.74 |
| 31768 | 295245.24 | 6126853.33 |
| 31768 | 295335.23 | 6126862.75 |
| 31771 | 297481.66 | 6127418.75 |
| 31774 | 294850.26 | 6125052.17 |
| 31774 | 294850.75 | 6125047.20 |
| 31774 | 294850.50 | 6125041.42 |
| 31775 | 294761.09 | 6128278.61 |
| 31776 | 295376.06 | 6125446.43 |
| 31776 | 295378.96 | 6125421.28 |
| 31777 | 293915.97 | 6125331.57 |
| 31780 | 293952.73 | 6126488.04 |
| 31781 | 293899.99 | 6125625.60 |
| 31781 | 293890.88 | 6125607.95 |
| 31782 | 295515.84 | 6127221.40 |
| 31783 | 295670.70 | 6125431.59 |
| 31785 | 295691.02 | 6126486.03 |
| 31786 | 294923.87 | 6125993.65 |
| 31787 | 297545.44 | 6126544.22 |
| 31787 | 297450.95 | 6126527.08 |
| 31788 | 294440.24 | 6126625.68 |
| 31788 | 294406.62 | 6126633.16 |
| 31788 | 294387.25 | 6126633.74 |
| 31790 | 295356.80 | 6126865.21 |
| 31790 | 295453.53 | 6126876.24 |
| 31791 | 293274.84 | 6126879.80 |
| 31791 | 293261.76 | 6126870.71 |
| 31793 | 294533.57 | 6125082.52 |

|       |           |            |
|-------|-----------|------------|
| 31798 | 296774.64 | 6126301.44 |
| 31802 | 295031.27 | 6128299.38 |
| 31802 | 295018.29 | 6128300.35 |
| 31802 | 295011.97 | 6128300.86 |
| 31806 | 294429.50 | 6126222.73 |
| 31811 | 294795.04 | 6125356.33 |
| 31815 | 293972.13 | 6125334.79 |
| 31816 | 295717.25 | 6127900.76 |
| 31820 | 294762.08 | 6127149.60 |
| 31821 | 295259.09 | 6124868.11 |
| 31821 | 295265.75 | 6124867.95 |
| 31829 | 294290.98 | 6124719.98 |
| 31829 | 294285.52 | 6124705.21 |
| 31832 | 295247.36 | 6125059.28 |
| 31832 | 295245.91 | 6125028.11 |
| 31834 | 295494.84 | 6124992.70 |
| 31850 | 294999.39 | 6128301.89 |
| 31861 | 295243.81 | 6124895.75 |
| 31864 | 293424.61 | 6128010.98 |
| 31879 | 295445.82 | 6126083.11 |
| 31879 | 295462.89 | 6126085.23 |
| 31880 | 297781.08 | 6127222.27 |
| 31881 | 295000.46 | 6125184.45 |
| 31883 | 294653.44 | 6125285.50 |
| 31886 | 294340.18 | 6126193.48 |
| 31888 | 295133.33 | 6125278.34 |
| 31900 | 295449.32 | 6125150.86 |
| 31903 | 294869.76 | 6124747.89 |
| 31905 | 295387.50 | 6125153.60 |
| 31911 | 295797.32 | 6128610.63 |
| 31916 | 295482.72 | 6125077.98 |
| 31918 | 295444.29 | 6127435.59 |
| 31922 | 294105.16 | 6127222.84 |
| 31922 | 294109.94 | 6127220.30 |
| 31924 | 294534.43 | 6124758.26 |
| 31928 | 294886.81 | 6127356.66 |
| 31929 | 296424.19 | 6126424.34 |
| 31932 | 294774.33 | 6124823.85 |
| 31935 | 294586.18 | 6124894.69 |
| 31939 | 297673.38 | 6127176.90 |
| 31947 | 296385.80 | 6126598.59 |
| 31947 | 296395.20 | 6126607.40 |
| 31948 | 297705.93 | 6126974.29 |
| 31950 | 295891.07 | 6127109.69 |
| 31954 | 298092.00 | 6127977.16 |
| 31955 | 294810.64 | 6127738.93 |
| 31956 | 297824.64 | 6127720.53 |
| 31964 | 295005.64 | 6126535.27 |
| 31964 | 295033.64 | 6126538.95 |
| 31984 | 293934.75 | 6125608.55 |

|       |           |            |
|-------|-----------|------------|
| 31989 | 294327.75 | 6126525.42 |
| 31992 | 297289.85 | 6127859.75 |
| 31992 | 297283.22 | 6127860.42 |
| 31993 | 294459.55 | 6124863.91 |
| 31993 | 294463.28 | 6124874.20 |
| 31994 | 296125.15 | 6126299.05 |
| 32001 | 295396.46 | 6128348.58 |
| 32005 | 296848.93 | 6128334.50 |
| 32006 | 294132.40 | 6125198.78 |
| 32013 | 296967.56 | 6127607.58 |
| 32014 | 295157.83 | 6127822.29 |
| 32014 | 295193.67 | 6127822.47 |
| 32019 | 295380.82 | 6125607.14 |
| 32019 | 295381.87 | 6125599.62 |
| 32019 | 295431.41 | 6125606.27 |
| 32021 | 294548.80 | 6124799.57 |
| 32021 | 294563.27 | 6124838.83 |
| 32022 | 297822.82 | 6126861.53 |
| 32023 | 298340.09 | 6128044.79 |
| 32023 | 298349.86 | 6128059.75 |
| 32030 | 294278.02 | 6124734.05 |
| 32033 | 294941.95 | 6128482.28 |
| 32036 | 295523.16 | 6127266.48 |
| 32037 | 294773.30 | 6127518.97 |
| 32038 | 294326.85 | 6125649.76 |
| 32039 | 297779.07 | 6126814.86 |
| 32040 | 294508.23 | 6124966.85 |
| 32040 | 294541.18 | 6124954.87 |
| 32041 | 297852.69 | 6126092.94 |
| 32049 | 295791.70 | 6125333.17 |
| 32050 | 297576.38 | 6127037.90 |
| 32051 | 297214.59 | 6127868.11 |
| 32061 | 294657.34 | 6127904.99 |
| 32062 | 294434.87 | 6125083.94 |
| 32062 | 294425.12 | 6125056.64 |
| 32066 | 295331.03 | 6125204.13 |
| 32066 | 295326.32 | 6125173.30 |
| 32068 | 297227.50 | 6127845.95 |
| 32069 | 295772.61 | 6125450.09 |
| 32082 | 294507.00 | 6127081.37 |
| 32083 | 294649.97 | 6127924.50 |
| 32088 | 295377.42 | 6127394.79 |
| 32089 | 293528.08 | 6126845.47 |
| 32098 | 294542.48 | 6125063.12 |
| 32099 | 295012.31 | 6124692.25 |
| 32106 | 295454.48 | 6125439.32 |
| 32107 | 295229.32 | 6126168.10 |
| 32111 | 295162.37 | 6127819.57 |
| 32114 | 294744.19 | 6126075.21 |
| 32115 | 296551.90 | 6128265.12 |

|       |           |            |
|-------|-----------|------------|
| 32119 | 295999.32 | 6127838.26 |
| 32119 | 295994.66 | 6127849.72 |
| 32119 | 295986.82 | 6127868.69 |
| 32123 | 294215.00 | 6127341.59 |
| 32124 | 296718.07 | 6128778.49 |
| 32124 | 296684.54 | 6128785.68 |
| 32128 | 293840.94 | 6125706.04 |
| 32133 | 295971.12 | 6127554.90 |
| 32137 | 295319.00 | 6125021.72 |
| 32140 | 295808.87 | 6128119.70 |
| 32142 | 295198.63 | 6127258.88 |
| 32143 | 295641.01 | 6125413.67 |
| 32149 | 295984.08 | 6126444.50 |
| 32149 | 295986.88 | 6126414.30 |
| 32159 | 295437.09 | 6127499.33 |
| 32160 | 295195.22 | 6124749.43 |
| 32163 | 296992.14 | 6128109.58 |
| 32163 | 296991.62 | 6128104.20 |
| 32165 | 295342.47 | 6125230.53 |
| 32166 | 294827.45 | 6125258.80 |
| 32167 | 294527.61 | 6126375.71 |
| 32172 | 295823.38 | 6127987.51 |
| 32175 | 294920.02 | 6124885.15 |
| 32176 | 294262.01 | 6126553.49 |
| 32176 | 294261.90 | 6126552.64 |
| 32177 | 294763.12 | 6124833.75 |
| 32180 | 295786.86 | 6128408.63 |
| 32182 | 297824.72 | 6127780.73 |
| 32182 | 297825.78 | 6127783.57 |
| 32182 | 297825.81 | 6127783.94 |
| 32182 | 297829.55 | 6127805.74 |
| 32182 | 297831.89 | 6127812.30 |
| 32182 | 297837.97 | 6127818.66 |
| 32184 | 293473.08 | 6127263.84 |
| 32184 | 293468.38 | 6127271.62 |
| 32185 | 294701.70 | 6126335.81 |
| 32188 | 295131.19 | 6127831.94 |
| 32190 | 294779.79 | 6125625.89 |
| 32190 | 294772.13 | 6125624.91 |
| 32195 | 295432.37 | 6125361.21 |
| 32198 | 297107.85 | 6127692.56 |
| 32200 | 295449.85 | 6125487.61 |
| 32202 | 295932.40 | 6127440.27 |
| 32204 | 294935.31 | 6124773.42 |
| 32205 | 294525.04 | 6125327.01 |
| 32205 | 294521.94 | 6125317.48 |
| 32205 | 294518.65 | 6125307.38 |
| 32207 | 295756.34 | 6125281.89 |
| 32207 | 295756.07 | 6125267.23 |
| 32212 | 296024.27 | 6125584.28 |

|       |           |            |
|-------|-----------|------------|
| 32223 | 294850.04 | 6125679.00 |
| 32227 | 293734.11 | 6125318.29 |
| 32229 | 294759.77 | 6127644.29 |
| 32233 | 297192.99 | 6126863.08 |
| 32235 | 293694.41 | 6125144.43 |
| 32242 | 294423.93 | 6124885.72 |
| 32244 | 296012.47 | 6125155.01 |
| 32250 | 295130.95 | 6125302.45 |
| 32253 | 293080.36 | 6126880.75 |
| 32256 | 294428.45 | 6125983.92 |
| 32256 | 294437.43 | 6125990.10 |
| 32256 | 294458.56 | 6126004.63 |
| 32257 | 295722.11 | 6127977.89 |
| 32260 | 297029.53 | 6126275.22 |
| 32264 | 296527.56 | 6126338.71 |
| 32264 | 296527.94 | 6126338.80 |
| 32264 | 296528.52 | 6126334.67 |
| 32265 | 297609.01 | 6127218.91 |
| 32266 | 298684.50 | 6127840.34 |
| 32267 | 293364.99 | 6131399.66 |
| 32267 | 293388.47 | 6131356.58 |
| 32270 | 296837.06 | 6126219.14 |
| 32272 | 295422.51 | 6124924.93 |
| 32272 | 295421.70 | 6124913.59 |
| 32276 | 297262.41 | 6127003.41 |
| 32277 | 294745.19 | 6125886.00 |
| 32283 | 295521.09 | 6127382.83 |
| 32287 | 295240.39 | 6125166.59 |
| 32299 | 296537.31 | 6127387.51 |
| 32299 | 296541.35 | 6127389.54 |
| 32299 | 296545.43 | 6127391.51 |
| 32299 | 296549.54 | 6127393.41 |
| 32299 | 296553.68 | 6127395.23 |
| 32299 | 296555.29 | 6127395.92 |
| 32299 | 296559.35 | 6127397.60 |
| 32299 | 296563.44 | 6127399.21 |
| 32299 | 296567.56 | 6127400.75 |
| 32299 | 296571.77 | 6127402.24 |
| 32299 | 296576.49 | 6127403.21 |
| 32300 | 294598.18 | 6124936.50 |
| 32301 | 296385.52 | 6125562.91 |
| 32303 | 294781.99 | 6127637.19 |
| 32307 | 294613.14 | 6125298.76 |
| 32307 | 294611.80 | 6125296.01 |
| 32308 | 294950.16 | 6125271.30 |
| 32309 | 294650.48 | 6125309.50 |
| 32315 | 296596.05 | 6126541.78 |
| 32316 | 298725.54 | 6127619.29 |
| 32327 | 295236.12 | 6127298.81 |
| 32327 | 295248.97 | 6127297.04 |

|       |           |            |
|-------|-----------|------------|
| 32327 | 295263.24 | 6127294.74 |
| 32333 | 295322.66 | 6124966.33 |
| 32335 | 294588.60 | 6127024.43 |
| 32335 | 294592.87 | 6126964.50 |
| 32336 | 298394.80 | 6128035.41 |
| 32340 | 294547.07 | 6125593.92 |
| 32340 | 294565.07 | 6125649.57 |
| 32341 | 295349.44 | 6125204.71 |
| 32345 | 296760.03 | 6128295.97 |
| 32346 | 294578.46 | 6127165.97 |
| 32346 | 294558.26 | 6127167.97 |
| 32348 | 294114.96 | 6125152.17 |
| 32356 | 294868.09 | 6125264.33 |
| 32356 | 294873.68 | 6125211.43 |
| 32357 | 296950.48 | 6127505.34 |
| 32359 | 298410.45 | 6127661.05 |
| 32363 | 295328.26 | 6124998.40 |
| 32365 | 297167.39 | 6126475.77 |
| 32365 | 297172.76 | 6126447.58 |
| 32365 | 297224.17 | 6126469.60 |
| 32365 | 297223.62 | 6126474.82 |
| 32365 | 297223.03 | 6126480.40 |
| 32366 | 295660.01 | 6125144.01 |
| 32367 | 295346.44 | 6125201.47 |
| 32374 | 295127.84 | 6128016.82 |
| 32375 | 295889.46 | 6128605.43 |
| 32380 | 294944.93 | 6125994.70 |
| 32380 | 294961.51 | 6125991.84 |
| 32380 | 294971.54 | 6125989.39 |
| 32381 | 295616.39 | 6125073.71 |
| 32382 | 294333.64 | 6125926.20 |
| 32383 | 294605.26 | 6127076.61 |
| 32390 | 296350.80 | 6126068.63 |
| 32390 | 296376.61 | 6126073.18 |
| 32391 | 295671.70 | 6125211.12 |
| 32392 | 297830.92 | 6127715.84 |
| 32393 | 294979.55 | 6124998.01 |
| 32393 | 295020.39 | 6125001.73 |
| 32394 | 299071.10 | 6129004.36 |
| 32395 | 294446.28 | 6126247.85 |
| 32395 | 294441.29 | 6126243.16 |
| 32395 | 294434.69 | 6126234.80 |
| 32397 | 296477.65 | 6126555.01 |
| 32397 | 296477.33 | 6126542.70 |
| 32397 | 296478.47 | 6126533.83 |
| 32400 | 296142.16 | 6126058.84 |
| 32400 | 296133.02 | 6126057.54 |
| 32401 | 295031.67 | 6124510.15 |
| 32401 | 295031.38 | 6124495.42 |
| 32403 | 293570.40 | 6127481.67 |

|       |           |            |
|-------|-----------|------------|
| 32403 | 293566.54 | 6127478.21 |
| 32403 | 293562.88 | 6127473.97 |
| 32403 | 293559.99 | 6127467.61 |
| 32403 | 293556.50 | 6127458.36 |
| 32409 | 294802.26 | 6127081.66 |
| 32418 | 296656.65 | 6128012.23 |
| 32422 | 295846.00 | 6128607.88 |
| 32423 | 294233.49 | 6126072.51 |
| 32424 | 294898.28 | 6125684.08 |
| 32425 | 296944.21 | 6126324.10 |
| 32425 | 296962.89 | 6126280.78 |
| 32428 | 294479.81 | 6124732.92 |
| 32432 | 294139.58 | 6127174.53 |
| 32433 | 293543.67 | 6125304.29 |
| 32434 | 295548.79 | 6125076.62 |
| 32434 | 295579.02 | 6125075.48 |
| 32439 | 293967.14 | 6127458.45 |
| 32440 | 295505.55 | 6127481.81 |
| 32441 | 295466.34 | 6125402.50 |
| 32443 | 297517.44 | 6127251.85 |
| 32446 | 295381.89 | 6125132.32 |
| 32446 | 295380.72 | 6125096.27 |
| 32450 | 298664.96 | 6127790.14 |
| 32452 | 296949.38 | 6128114.44 |
| 32454 | 297335.46 | 6126972.94 |
| 32460 | 296566.41 | 6126153.65 |
| 32460 | 296567.45 | 6126167.56 |
| 32460 | 296569.14 | 6126195.14 |
| 32460 | 296568.88 | 6126205.87 |
| 32461 | 296731.92 | 6126501.86 |
| 32463 | 295325.17 | 6126019.21 |
| 32469 | 293318.88 | 6126850.91 |
| 32470 | 293398.87 | 6126850.43 |
| 32471 | 293438.87 | 6126850.18 |
| 32474 | 293674.84 | 6127260.17 |
| 32474 | 293673.40 | 6127274.90 |
| 32474 | 293673.31 | 6127307.11 |
| 32475 | 298126.59 | 6127918.36 |
| 32476 | 294687.96 | 6124704.04 |
| 32477 | 296212.64 | 6127166.79 |
| 32477 | 296214.65 | 6127176.59 |
| 32477 | 296218.93 | 6127197.38 |
| 32477 | 296223.59 | 6127220.07 |
| 32481 | 293859.11 | 6125126.72 |
| 32481 | 293817.17 | 6125150.07 |
| 32497 | 293962.12 | 6125510.58 |
| 32500 | 295372.80 | 6127543.96 |
| 32502 | 296229.02 | 6125431.81 |
| 32506 | 294981.75 | 6126690.44 |
| 32507 | 297989.11 | 6127412.74 |

|       |           |            |
|-------|-----------|------------|
| 32507 | 297996.15 | 6127409.53 |
| 32509 | 295710.93 | 6125183.81 |
| 32510 | 294214.33 | 6127586.92 |
| 32512 | 297110.96 | 6127965.45 |
| 32513 | 295695.78 | 6127019.54 |
| 32514 | 296657.63 | 6127427.60 |
| 32521 | 297015.70 | 6126298.01 |
| 32526 | 293358.79 | 6126836.53 |
| 32526 | 293358.88 | 6126850.67 |
| 32532 | 295210.24 | 6127817.77 |
| 32532 | 295213.34 | 6127814.18 |
| 32532 | 295229.06 | 6127799.86 |
| 32532 | 295247.30 | 6127783.28 |
| 32535 | 294056.03 | 6127815.00 |
| 32536 | 296701.20 | 6126042.37 |
| 32546 | 296198.32 | 6127190.94 |
| 32551 | 295391.65 | 6127406.40 |
| 32552 | 294624.35 | 6126582.50 |
| 32552 | 294597.28 | 6126587.88 |
| 32553 | 295945.66 | 6127119.26 |
| 32554 | 296125.66 | 6128149.93 |
| 32554 | 296121.88 | 6128121.24 |
| 32554 | 296118.90 | 6128100.05 |
| 32556 | 295794.64 | 6125179.94 |
| 32556 | 295819.23 | 6125179.18 |
| 32556 | 295830.35 | 6125178.84 |
| 32558 | 298629.61 | 6127680.17 |
| 32559 | 297227.38 | 6127012.16 |
| 32560 | 295323.57 | 6125139.13 |
| 32561 | 295601.88 | 6125145.56 |
| 32562 | 295476.55 | 6125673.21 |
| 32562 | 295488.08 | 6125674.84 |
| 32563 | 297725.22 | 6126781.81 |
| 32564 | 295609.68 | 6125114.22 |
| 32568 | 293993.10 | 6124721.89 |
| 32572 | 296693.72 | 6126626.56 |
| 32584 | 297532.70 | 6127326.13 |
| 32585 | 294781.33 | 6127525.84 |
| 32586 | 295478.10 | 6125124.43 |
| 32588 | 295428.75 | 6125095.56 |
| 32589 | 294089.92 | 6124624.43 |
| 32589 | 294091.66 | 6124629.11 |
| 32590 | 294127.74 | 6124611.42 |
| 32590 | 294129.48 | 6124616.10 |
| 32591 | 294195.60 | 6124587.43 |
| 32591 | 294197.34 | 6124592.11 |
| 32592 | 294052.54 | 6124638.68 |
| 32592 | 294054.29 | 6124643.37 |
| 32593 | 294014.71 | 6124651.66 |
| 32593 | 294016.45 | 6124656.34 |



|       |           |            |
|-------|-----------|------------|
| 32594 | 294165.25 | 6124597.56 |
| 32594 | 294166.99 | 6124602.24 |
| 32603 | 295541.60 | 6125104.71 |
| 32604 | 296724.23 | 6126590.20 |
| 32604 | 296729.96 | 6126600.31 |
| 32609 | 298427.36 | 6127806.03 |
| 32609 | 298436.11 | 6127829.67 |
| 32609 | 298414.73 | 6127834.15 |
| 32609 | 298382.86 | 6127842.16 |
| 32609 | 298373.46 | 6127844.06 |
| 32609 | 298370.19 | 6127844.06 |
| 32609 | 298365.15 | 6127842.97 |
| 32609 | 298356.30 | 6127837.25 |
| 32611 | 297424.23 | 6126387.09 |
| 32611 | 297425.49 | 6126381.22 |
| 32611 | 297403.33 | 6126364.84 |
| 32611 | 297387.90 | 6126353.26 |
| 32611 | 297362.55 | 6126332.51 |
| 32612 | 295213.27 | 6125201.30 |
| 32612 | 295227.04 | 6125240.56 |
| 32618 | 294655.49 | 6125989.25 |
| 32618 | 294650.91 | 6125948.73 |
| 32618 | 294656.69 | 6125944.47 |
| 32618 | 294664.43 | 6125940.82 |
| 32618 | 294668.53 | 6125936.47 |
| 32621 | 295331.47 | 6125884.14 |
| 32621 | 295325.40 | 6125928.47 |
| 32622 | 296541.27 | 6125876.04 |
| 32622 | 296538.09 | 6125827.42 |
| 32623 | 295874.35 | 6125252.98 |
| 32625 | 293153.43 | 6126852.60 |
| 32627 | 298123.44 | 6127613.86 |
| 32628 | 293762.24 | 6127989.86 |
| 32630 | 298682.47 | 6127852.03 |
| 32630 | 298685.19 | 6127862.70 |
| 32630 | 298687.52 | 6127872.11 |
| 32630 | 298697.69 | 6127891.10 |
| 32631 | 295819.75 | 6124989.07 |
| 32631 | 295848.80 | 6124989.02 |
| 32639 | 296173.41 | 6127077.31 |
| 32639 | 296175.43 | 6127086.51 |
| 32640 | 295318.83 | 6124866.78 |
| 32640 | 295352.71 | 6124865.70 |
| 32643 | 297394.76 | 6126897.98 |
| 32643 | 297410.53 | 6126857.48 |
| 32646 | 297677.82 | 6127094.82 |
| 32651 | 297674.60 | 6126724.79 |
| 32654 | 297159.42 | 6128339.89 |
| 32654 | 297175.21 | 6128407.90 |
| 32659 | 296752.54 | 6126337.39 |

|       |           |            |
|-------|-----------|------------|
| 32660 | 294393.28 | 6125851.14 |
| 32661 | 294772.00 | 6125423.49 |
| 32662 | 296878.81 | 6126632.85 |
| 32665 | 297095.35 | 6128092.88 |
| 32665 | 297096.75 | 6128103.55 |
| 32665 | 297106.22 | 6128102.25 |
| 32665 | 297129.89 | 6128105.46 |
| 32665 | 297142.29 | 6128109.26 |
| 32666 | 295818.21 | 6128238.51 |
| 32667 | 293914.73 | 6127303.60 |
| 32667 | 293914.78 | 6127313.43 |
| 32670 | 295870.21 | 6124811.99 |
| 32670 | 295896.89 | 6124812.39 |
| 32671 | 294918.81 | 6128033.80 |
| 32677 | 297390.93 | 6128346.16 |
| 32678 | 294150.54 | 6127921.62 |
| 32679 | 294152.71 | 6128091.03 |
| 32684 | 294917.30 | 6126887.53 |
| 32684 | 294915.03 | 6126911.08 |
| 32687 | 293756.05 | 6125183.61 |
| 32688 | 296749.18 | 6125877.95 |
| 32688 | 296762.60 | 6125878.53 |
| 32689 | 295883.43 | 6125440.10 |
| 32691 | 293906.65 | 6127842.67 |
| 32692 | 295259.39 | 6124968.37 |
| 32692 | 295280.87 | 6124967.30 |
| 32692 | 295312.69 | 6124966.46 |
| 32694 | 294259.29 | 6124630.14 |
| 32695 | 295314.57 | 6125064.83 |
| 32698 | 296310.98 | 6128333.54 |
| 32705 | 297398.74 | 6127853.37 |
| 32705 | 297413.24 | 6127854.85 |
| 32705 | 297430.60 | 6127857.39 |
| 32705 | 297448.90 | 6127860.68 |
| 32706 | 294370.62 | 6127329.78 |
| 32707 | 294564.84 | 6126034.60 |
| 32707 | 294563.82 | 6126014.19 |
| 32707 | 294563.71 | 6126011.47 |
| 32709 | 298255.48 | 6127980.65 |
| 32711 | 297822.33 | 6127642.51 |
| 32711 | 297828.41 | 6127642.79 |
| 32711 | 297841.99 | 6127646.64 |
| 32711 | 297864.21 | 6127652.87 |
| 32711 | 297871.84 | 6127653.08 |
| 32721 | 297221.89 | 6128274.88 |
| 32721 | 297220.59 | 6128270.57 |
| 32721 | 297215.07 | 6128247.75 |
| 32722 | 297249.58 | 6128251.78 |
| 32725 | 294223.77 | 6126087.47 |
| 32726 | 298800.55 | 6128189.75 |

|       |           |            |
|-------|-----------|------------|
| 32726 | 298824.72 | 6128191.25 |
| 32726 | 298834.00 | 6128191.42 |
| 32727 | 297281.67 | 6128244.07 |
| 32733 | 297315.10 | 6128368.28 |
| 32734 | 298704.50 | 6127915.10 |
| 32734 | 298719.00 | 6127967.65 |
| 32734 | 298722.19 | 6127970.71 |
| 32734 | 298725.59 | 6127973.01 |
| 32738 | 298290.36 | 6127856.26 |
| 32740 | 293375.11 | 6126949.46 |
| 32741 | 294043.92 | 6124731.41 |
| 32742 | 294213.18 | 6127336.71 |
| 32745 | 298244.72 | 6129079.62 |
| 32746 | 296509.34 | 6126652.78 |
| 32746 | 296505.35 | 6126683.07 |
| 32746 | 296506.05 | 6126690.36 |
| 32746 | 296508.01 | 6126697.42 |
| 32746 | 296509.67 | 6126701.28 |
| 32746 | 296512.30 | 6126705.59 |
| 32749 | 296824.75 | 6128370.52 |
| 32749 | 296896.17 | 6128356.34 |
| 32752 | 298126.72 | 6127729.07 |
| 32765 | 294036.38 | 6125459.27 |
| 32765 | 294022.18 | 6125432.09 |
| 32766 | 295022.55 | 6125072.05 |
| 32769 | 294959.95 | 6125179.67 |
| 32773 | 294316.84 | 6127542.10 |
| 32774 | 293082.39 | 6126877.47 |
| 32776 | 294776.18 | 6127517.68 |
| 32777 | 295667.02 | 6125037.60 |
| 32778 | 294751.77 | 6125818.92 |
| 32779 | 295047.39 | 6126552.61 |
| 32783 | 294225.41 | 6125631.31 |
| 32783 | 294258.36 | 6125614.70 |
| 32783 | 294283.40 | 6125603.60 |
| 32785 | 297818.02 | 6127683.56 |
| 32790 | 294646.57 | 6126920.01 |
| 32791 | 296640.83 | 6125877.17 |
| 32791 | 296693.26 | 6125875.60 |
| 32793 | 294357.54 | 6127082.05 |
| 32793 | 294358.28 | 6127092.59 |
| 32794 | 295863.86 | 6125020.04 |
| 32795 | 297145.40 | 6126892.29 |
| 32796 | 294750.96 | 6127877.94 |
| 32797 | 296315.55 | 6128375.51 |
| 32801 | 297180.36 | 6128282.93 |
| 32801 | 297177.10 | 6128267.97 |
| 32801 | 297170.91 | 6128243.45 |
| 32804 | 297794.92 | 6126902.88 |
| 32809 | 294054.32 | 6126384.09 |

|       |           |            |
|-------|-----------|------------|
| 32810 | 297042.42 | 6126195.98 |
| 32812 | 294090.23 | 6125312.93 |
| 32812 | 294064.97 | 6125327.14 |
| 32813 | 298981.48 | 6128936.04 |
| 32817 | 295658.51 | 6125246.17 |
| 32817 | 295658.00 | 6125214.54 |
| 32817 | 295657.84 | 6125211.51 |
| 32817 | 295657.30 | 6125202.21 |
| 32817 | 295657.10 | 6125195.09 |
| 32818 | 293947.60 | 6127573.55 |
| 32818 | 293949.99 | 6127533.98 |
| 32818 | 293950.43 | 6127526.74 |
| 32818 | 293950.49 | 6127525.81 |
| 32819 | 294194.03 | 6127649.12 |
| 32819 | 294232.97 | 6127644.08 |
| 32819 | 294251.80 | 6127641.49 |
| 32819 | 294253.97 | 6127658.77 |
| 32819 | 294254.78 | 6127669.42 |
| 32821 | 296773.31 | 6126070.49 |
| 32823 | 293766.75 | 6125585.92 |
| 32825 | 293765.63 | 6128066.51 |
| 32826 | 296123.70 | 6125266.88 |
| 32826 | 296099.17 | 6125253.65 |
| 32827 | 295464.62 | 6125305.27 |
| 32827 | 295490.16 | 6125305.75 |
| 32828 | 296416.86 | 6128350.93 |
| 32828 | 296418.38 | 6128350.70 |
| 32828 | 296420.26 | 6128350.41 |
| 32830 | 295198.61 | 6125070.16 |
| 32831 | 297989.58 | 6126186.89 |
| 32831 | 297961.44 | 6126148.53 |
| 32832 | 294392.87 | 6126407.09 |
| 32835 | 295617.58 | 6128174.78 |
| 32835 | 295619.29 | 6128174.53 |
| 32838 | 296408.85 | 6126001.26 |
| 32838 | 296412.62 | 6126033.69 |
| 32838 | 296414.78 | 6126049.16 |
| 32838 | 296416.54 | 6126064.77 |
| 32840 | 294757.47 | 6125773.07 |
| 32842 | 295452.98 | 6128538.46 |
| 32844 | 295040.56 | 6124482.37 |
| 32844 | 295039.42 | 6124455.45 |
| 32845 | 298626.57 | 6128023.17 |
| 32845 | 298622.52 | 6128004.14 |
| 32847 | 296808.54 | 6128754.94 |
| 32848 | 294388.72 | 6127845.94 |
| 32848 | 294308.04 | 6127841.36 |
| 32849 | 296700.02 | 6126091.09 |
| 32849 | 296698.41 | 6126125.80 |
| 32850 | 297413.21 | 6126845.50 |

|       |           |            |
|-------|-----------|------------|
| 32851 | 295271.23 | 6125978.09 |
| 32852 | 294761.99 | 6125726.93 |
| 32857 | 295960.00 | 6125134.33 |
| 32858 | 295804.22 | 6126138.96 |
| 32858 | 295800.53 | 6126178.74 |
| 32859 | 295697.15 | 6126758.74 |
| 32862 | 296979.01 | 6127871.67 |
| 32864 | 296074.09 | 6125427.01 |
| 32867 | 297640.62 | 6127282.02 |
| 32867 | 297636.67 | 6127260.83 |
| 32867 | 297686.93 | 6127251.42 |
| 32871 | 295008.94 | 6125205.38 |
| 32874 | 294139.79 | 6127353.31 |
| 32877 | 295260.82 | 6127877.26 |
| 32877 | 295269.61 | 6127883.40 |
| 32879 | 294985.83 | 6127268.54 |
| 32881 | 294560.13 | 6126504.76 |
| 32882 | 296198.42 | 6128117.29 |
| 32884 | 295410.75 | 6127273.50 |
| 32886 | 297624.84 | 6127311.55 |
| 32886 | 297689.46 | 6127299.95 |
| 32888 | 295782.80 | 6125031.08 |
| 32890 | 298333.61 | 6127941.17 |
| 32893 | 295353.40 | 6125274.56 |
| 32893 | 295355.54 | 6125292.03 |
| 32893 | 295359.83 | 6125326.69 |
| 32893 | 295360.53 | 6125333.42 |
| 32894 | 296088.90 | 6128460.46 |
| 32894 | 296087.26 | 6128448.46 |
| 32894 | 296084.79 | 6128430.05 |
| 32899 | 295734.90 | 6128575.02 |
| 32902 | 296626.19 | 6126751.90 |
| 32907 | 298550.68 | 6128206.18 |
| 32907 | 298628.67 | 6128188.39 |
| 32908 | 294736.45 | 6125677.63 |
| 32908 | 294766.67 | 6125681.16 |
| 32908 | 294767.09 | 6125681.21 |
| 32909 | 294343.47 | 6125979.08 |
| 32909 | 294411.46 | 6125969.50 |
| 32912 | 295727.80 | 6127451.07 |
| 32917 | 297722.09 | 6127335.49 |
| 32919 | 295426.42 | 6125051.34 |
| 32920 | 296993.37 | 6128009.27 |
| 32920 | 296999.67 | 6128008.56 |
| 32923 | 293105.50 | 6126921.14 |
| 32924 | 295210.99 | 6124920.24 |
| 32926 | 297705.93 | 6127291.06 |
| 32928 | 293847.17 | 6125321.00 |
| 32929 | 293884.26 | 6125301.30 |
| 32930 | 293919.26 | 6125236.17 |

|       |           |            |
|-------|-----------|------------|
| 32931 | 295475.63 | 6125058.35 |
| 32932 | 294343.66 | 6124863.62 |
| 32932 | 294366.81 | 6124855.41 |
| 32934 | 297147.28 | 6128128.66 |
| 32935 | 293690.24 | 6124993.85 |
| 32935 | 293695.85 | 6125003.92 |
| 32935 | 293710.68 | 6125030.52 |
| 32938 | 295881.72 | 6128376.05 |
| 32938 | 295881.42 | 6128370.89 |
| 32938 | 295875.10 | 6128319.02 |
| 32942 | 295003.70 | 6126384.59 |
| 32943 | 294770.48 | 6128421.43 |
| 32945 | 294909.69 | 6126985.58 |
| 32946 | 294812.71 | 6128423.40 |
| 32947 | 295187.71 | 6125021.13 |
| 32948 | 298148.01 | 6127756.29 |
| 32949 | 294770.81 | 6126344.66 |
| 32949 | 294784.47 | 6126366.95 |
| 32949 | 294801.91 | 6126398.35 |
| 32951 | 295600.48 | 6125037.02 |
| 32953 | 294854.09 | 6128420.06 |
| 32954 | 296759.00 | 6126269.60 |
| 32957 | 296346.21 | 6125611.32 |
| 32958 | 297558.01 | 6127215.46 |
| 32958 | 297548.77 | 6127166.22 |
| 32963 | 295853.79 | 6126699.82 |
| 32963 | 295845.00 | 6126761.20 |
| 32965 | 293205.93 | 6126939.87 |
| 32965 | 293256.92 | 6126909.16 |
| 32968 | 296562.88 | 6126328.04 |
| 32968 | 296568.11 | 6126326.98 |
| 32968 | 296617.38 | 6126332.93 |
| 32969 | 293917.25 | 6126614.40 |
| 32971 | 296625.68 | 6126669.46 |
| 32972 | 295048.68 | 6127008.79 |
| 32973 | 294747.06 | 6128575.23 |
| 32974 | 295797.08 | 6125269.54 |
| 32974 | 295796.45 | 6125247.67 |
| 32974 | 295794.59 | 6125203.37 |
| 32977 | 299003.93 | 6128856.68 |
| 32977 | 299013.41 | 6128874.14 |
| 32977 | 299022.93 | 6128924.52 |
| 32978 | 297461.60 | 6128063.95 |
| 32981 | 295166.59 | 6125121.83 |
| 32981 | 295204.17 | 6125120.96 |
| 32982 | 295538.25 | 6125015.83 |
| 32983 | 298175.70 | 6129052.84 |
| 32989 | 298862.62 | 6128185.09 |
| 32989 | 298907.30 | 6128174.79 |
| 32990 | 294735.71 | 6126008.94 |

|       |           |            |
|-------|-----------|------------|
| 32990 | 294736.20 | 6126003.96 |
| 32991 | 296701.51 | 6126309.56 |
| 32991 | 296698.96 | 6126279.73 |
| 32991 | 296701.92 | 6126258.03 |
| 32993 | 295760.90 | 6125761.23 |
| 32994 | 296365.53 | 6126322.34 |
| 32994 | 296377.14 | 6126323.51 |
| 32995 | 293935.75 | 6127670.65 |
| 32995 | 293937.65 | 6127646.25 |
| 32995 | 293940.63 | 6127601.82 |
| 32995 | 293940.85 | 6127598.78 |
| 32995 | 293940.88 | 6127598.28 |
| 32999 | 295189.76 | 6124970.65 |
| 33000 | 294047.75 | 6125586.93 |
| 33001 | 295379.72 | 6125069.13 |
| 33001 | 295377.73 | 6125012.68 |
| 33008 | 294775.36 | 6127037.11 |
| 33009 | 295853.43 | 6124988.99 |
| 33009 | 295853.09 | 6124979.89 |
| 33010 | 296006.84 | 6125073.10 |
| 33010 | 296005.60 | 6125031.91 |
| 33011 | 298786.00 | 6127688.71 |
| 33011 | 298809.15 | 6127727.48 |
| 33012 | 294898.85 | 6125054.13 |
| 33012 | 294902.14 | 6125025.32 |
| 33013 | 295820.88 | 6127969.36 |
| 33014 | 294023.28 | 6125152.63 |
| 33014 | 294030.26 | 6125147.88 |
| 33015 | 296480.81 | 6125450.88 |
| 33016 | 293962.50 | 6126402.59 |
| 33016 | 293955.25 | 6126402.23 |
| 33018 | 299000.56 | 6128151.62 |
| 33019 | 294585.99 | 6127279.27 |
| 33019 | 294578.22 | 6127229.28 |
| 33019 | 294576.49 | 6127216.88 |
| 33019 | 294581.86 | 6127216.32 |
| 33025 | 293986.12 | 6125257.17 |
| 33025 | 293970.50 | 6125229.45 |
| 33026 | 295522.15 | 6125015.78 |
| 33027 | 294827.96 | 6128040.90 |
| 33028 | 295363.83 | 6126716.23 |
| 33031 | 296604.75 | 6128259.36 |
| 33031 | 296604.45 | 6128242.33 |
| 33035 | 297792.77 | 6127605.62 |
| 33036 | 295607.18 | 6125312.35 |
| 33036 | 295651.58 | 6125316.19 |
| 33037 | 297236.20 | 6126420.39 |
| 33038 | 298005.84 | 6127327.33 |
| 33043 | 296357.65 | 6128244.26 |
| 33043 | 296383.36 | 6128240.52 |

|       |           |            |
|-------|-----------|------------|
| 33044 | 297365.50 | 6126968.13 |
| 33044 | 297362.85 | 6126994.14 |
| 33044 | 297358.86 | 6127043.82 |
| 33045 | 294001.13 | 6125564.28 |
| 33047 | 293890.09 | 6124862.26 |
| 33049 | 294071.39 | 6125520.16 |
| 33050 | 295966.00 | 6127016.96 |
| 33051 | 294759.25 | 6127746.14 |
| 33054 | 296076.04 | 6126129.42 |
| 33055 | 294815.90 | 6125916.97 |
| 33056 | 294828.46 | 6126662.23 |
| 33056 | 294820.10 | 6126662.79 |
| 33057 | 295774.36 | 6126361.12 |
| 33058 | 293489.97 | 6127021.43 |
| 33059 | 297855.53 | 6127825.36 |
| 33059 | 297868.59 | 6127829.70 |
| 33059 | 297876.34 | 6127834.09 |
| 33059 | 297892.16 | 6127840.97 |
| 33059 | 297914.21 | 6127848.62 |
| 33060 | 295175.71 | 6125285.34 |
| 33061 | 296939.26 | 6127387.25 |
| 33061 | 296940.04 | 6127392.66 |
| 33063 | 295663.64 | 6125409.34 |
| 33063 | 295672.51 | 6125346.40 |
| 33063 | 295673.34 | 6125333.31 |
| 33069 | 294906.45 | 6126685.66 |
| 33069 | 294902.28 | 6126685.18 |
| 33069 | 294832.19 | 6126678.90 |
| 33070 | 293757.43 | 6125040.14 |
| 33070 | 293741.27 | 6125010.61 |
| 33071 | 294631.74 | 6125410.46 |
| 33072 | 294547.84 | 6127103.13 |
| 33072 | 294550.19 | 6127126.56 |
| 33072 | 294552.16 | 6127148.37 |
| 33072 | 294553.62 | 6127168.38 |
| 33073 | 293462.62 | 6125135.44 |
| 33073 | 293480.42 | 6125167.47 |
| 33075 | 294494.15 | 6127319.62 |
| 33075 | 294495.55 | 6127358.21 |
| 33077 | 297040.78 | 6127382.11 |
| 33078 | 293503.05 | 6126982.86 |
| 33078 | 293538.69 | 6126981.45 |
| 33086 | 294747.91 | 6125987.90 |
| 33088 | 294152.98 | 6127391.75 |
| 33091 | 297832.62 | 6127581.38 |
| 33091 | 297815.61 | 6127572.22 |
| 33091 | 297803.90 | 6127566.72 |
| 33091 | 297797.56 | 6127564.78 |
| 33091 | 297790.42 | 6127563.77 |
| 33091 | 297779.28 | 6127564.57 |



|       |           |            |
|-------|-----------|------------|
| 33093 | 294772.83 | 6127382.38 |
| 33093 | 294758.30 | 6127382.92 |
| 33093 | 294744.72 | 6127383.42 |
| 33095 | 297028.51 | 6127369.63 |
| 33099 | 296737.59 | 6128219.88 |
| 33099 | 296731.27 | 6128178.92 |
| 33102 | 297936.43 | 6127841.56 |
| 33102 | 297930.21 | 6127842.69 |
| 33105 | 295674.07 | 6128246.56 |
| 33105 | 295700.78 | 6128275.30 |
| 33105 | 295703.14 | 6128310.17 |
| 33107 | 296838.15 | 6127796.25 |
| 33108 | 298312.14 | 6128034.14 |
| 33108 | 298290.51 | 6128048.66 |
| 33110 | 297264.38 | 6126476.17 |
| 33112 | 294654.02 | 6127159.44 |
| 33112 | 294652.34 | 6127134.68 |
| 33112 | 294673.79 | 6127132.92 |
| 33112 | 294676.33 | 6127157.42 |
| 33113 | 294876.28 | 6124740.51 |
| 33113 | 294896.76 | 6124733.35 |
| 33118 | 297862.32 | 6127028.92 |
| 33123 | 294324.35 | 6126436.28 |
| 33123 | 294355.64 | 6126427.78 |
| 33123 | 294366.58 | 6126421.05 |
| 33123 | 294388.71 | 6126416.10 |
| 33123 | 294389.89 | 6126415.82 |
| 33127 | 298595.66 | 6127662.95 |
| 33128 | 295113.34 | 6126678.78 |
| 33130 | 296517.56 | 6126479.37 |
| 33130 | 296518.99 | 6126506.17 |
| 33130 | 296524.93 | 6126532.09 |
| 33130 | 296526.29 | 6126545.45 |
| 33131 | 295740.08 | 6125690.08 |
| 33133 | 296400.04 | 6128353.27 |
| 33137 | 294335.37 | 6126639.56 |
| 33140 | 294965.40 | 6125517.42 |
| 33142 | 294005.66 | 6125209.62 |
| 33142 | 294021.08 | 6125237.46 |
| 33142 | 294029.79 | 6125254.50 |
| 33143 | 295929.33 | 6126153.59 |
| 33145 | 295508.86 | 6127388.81 |
| 33148 | 293961.93 | 6124739.54 |
| 33148 | 293986.17 | 6124730.76 |
| 33149 | 295488.86 | 6127538.07 |
| 33149 | 295489.81 | 6127556.44 |
| 33151 | 296079.51 | 6125558.00 |
| 33151 | 296081.91 | 6125532.79 |
| 33157 | 293202.87 | 6126988.32 |
| 33159 | 296202.99 | 6127197.41 |

|       |           |            |
|-------|-----------|------------|
| 33159 | 296218.93 | 6127197.38 |
| 33159 | 296223.87 | 6127197.38 |
| 33160 | 293232.76 | 6126836.29 |
| 33164 | 293982.33 | 6125040.20 |
| 33165 | 294984.09 | 6125389.22 |
| 33165 | 294987.14 | 6125389.44 |
| 33166 | 294555.21 | 6125131.72 |
| 33168 | 294476.79 | 6127288.56 |
| 33171 | 295956.60 | 6125068.47 |
| 33171 | 295956.00 | 6125047.73 |
| 33171 | 295955.23 | 6125031.70 |
| 33171 | 295953.93 | 6125002.35 |
| 33172 | 294105.15 | 6127712.73 |
| 33176 | 293829.27 | 6125093.45 |
| 33176 | 293819.56 | 6125075.31 |
| 33177 | 295756.35 | 6125607.03 |
| 33177 | 295761.18 | 6125608.49 |
| 33177 | 295785.37 | 6125615.81 |
| 33177 | 295812.47 | 6125624.76 |
| 33178 | 294454.07 | 6124779.81 |
| 33179 | 293799.55 | 6125114.21 |
| 33179 | 293788.64 | 6125094.40 |
| 33179 | 293770.65 | 6125062.45 |
| 33180 | 294648.71 | 6125070.70 |
| 33180 | 294653.62 | 6125085.91 |
| 33180 | 294663.27 | 6125115.21 |
| 33181 | 293776.78 | 6125149.58 |
| 33181 | 293760.43 | 6125120.47 |
| 33181 | 293748.94 | 6125099.27 |
| 33182 | 293911.41 | 6125079.76 |
| 33182 | 293893.01 | 6125089.57 |
| 33184 | 297144.51 | 6128285.10 |
| 33184 | 297138.86 | 6128252.87 |
| 33184 | 297135.13 | 6128235.39 |
| 33185 | 297461.28 | 6127931.56 |
| 33186 | 294774.36 | 6127302.37 |
| 33186 | 294774.60 | 6127297.22 |
| 33187 | 296756.74 | 6128319.32 |
| 33187 | 296752.94 | 6128303.39 |
| 33187 | 296746.57 | 6128264.69 |
| 33190 | 298335.44 | 6127786.23 |
| 33190 | 298261.59 | 6127813.42 |
| 33193 | 293737.72 | 6125145.79 |
| 33193 | 293722.65 | 6125117.69 |
| 33194 | 294754.52 | 6127631.22 |
| 33196 | 294637.52 | 6124811.64 |
| 33196 | 294628.55 | 6124787.55 |
| 33197 | 294696.96 | 6125064.71 |
| 33197 | 294703.43 | 6125085.03 |
| 33198 | 295889.29 | 6125545.37 |

|       |           |            |
|-------|-----------|------------|
| 33200 | 295072.76 | 6126544.23 |
| 33200 | 295091.50 | 6126546.53 |
| 33200 | 295117.58 | 6126549.48 |
| 33200 | 295127.71 | 6126550.72 |
| 33201 | 295910.26 | 6128417.74 |
| 33202 | 294514.82 | 6127843.37 |
| 33202 | 294514.13 | 6127811.85 |
| 33202 | 294513.37 | 6127766.14 |
| 33204 | 294239.43 | 6127707.80 |
| 33205 | 293856.37 | 6125421.77 |
| 33206 | 299115.66 | 6129087.42 |
| 33208 | 293786.82 | 6127950.12 |
| 33211 | 294512.44 | 6127675.12 |
| 33212 | 297245.46 | 6126365.03 |
| 33213 | 295868.28 | 6125124.02 |
| 33213 | 295866.83 | 6125082.05 |
| 33213 | 295866.30 | 6125069.31 |
| 33215 | 294471.38 | 6125033.42 |
| 33215 | 294494.38 | 6125025.40 |
| 33218 | 294693.21 | 6126841.96 |
| 33218 | 294677.94 | 6126844.26 |
| 33218 | 294643.77 | 6126849.49 |
| 33218 | 294640.71 | 6126828.74 |
| 33219 | 294641.07 | 6127455.20 |
| 33220 | 294638.45 | 6127694.32 |
| 33220 | 294569.99 | 6127698.27 |
| 33221 | 297937.39 | 6127335.98 |
| 33222 | 295482.61 | 6126592.25 |
| 33223 | 298665.96 | 6129023.28 |
| 33228 | 294180.32 | 6126670.18 |
| 33230 | 295540.05 | 6127064.84 |
| 33232 | 295564.74 | 6126890.19 |
| 33234 | 295700.00 | 6126115.74 |
| 33234 | 295750.53 | 6126122.07 |
| 33234 | 295773.42 | 6126125.02 |
| 33234 | 295798.69 | 6126128.51 |
| 33235 | 293261.75 | 6127131.84 |
| 33236 | 295396.12 | 6126418.40 |
| 33236 | 295399.87 | 6126387.82 |
| 33236 | 295403.47 | 6126358.48 |
| 33237 | 294619.39 | 6127858.04 |
| 33238 | 296686.32 | 6127526.38 |
| 33239 | 295329.61 | 6127045.10 |
| 33243 | 296196.34 | 6125057.17 |
| 33244 | 295743.33 | 6126590.72 |
| 33244 | 295747.37 | 6126559.32 |
| 33245 | 296350.03 | 6126178.21 |
| 33245 | 296341.51 | 6126125.17 |
| 33246 | 296135.73 | 6125594.78 |
| 33246 | 296147.64 | 6125497.56 |

|       |           |            |
|-------|-----------|------------|
| 33249 | 295527.76 | 6124945.11 |
| 33251 | 293936.92 | 6125084.57 |
| 33251 | 293901.04 | 6125103.37 |
| 33253 | 293992.94 | 6127726.34 |
| 33253 | 293949.54 | 6127731.64 |
| 33253 | 293939.66 | 6127732.90 |
| 33253 | 293926.37 | 6127718.85 |
| 33253 | 293906.26 | 6127697.45 |
| 33253 | 293912.12 | 6127696.34 |
| 33253 | 293925.43 | 6127694.06 |
| 33255 | 295878.72 | 6126511.81 |
| 33255 | 295881.06 | 6126512.10 |
| 33257 | 295307.86 | 6126189.19 |
| 33257 | 295309.74 | 6126189.43 |
| 33257 | 295375.70 | 6126198.10 |
| 33258 | 294824.50 | 6124813.30 |
| 33261 | 295639.21 | 6126422.07 |
| 33261 | 295642.57 | 6126398.78 |
| 33261 | 295645.35 | 6126375.63 |
| 33263 | 295523.62 | 6126342.48 |
| 33266 | 295745.91 | 6126622.84 |
| 33266 | 295755.81 | 6126623.50 |
| 33266 | 295777.30 | 6126626.54 |
| 33266 | 295810.25 | 6126630.09 |
| 33267 | 294923.61 | 6124485.49 |
| 33267 | 294922.47 | 6124458.57 |
| 33268 | 294974.59 | 6124484.23 |
| 33268 | 294973.45 | 6124457.31 |
| 33269 | 298289.27 | 6127999.16 |
| 33269 | 298272.43 | 6128010.59 |
| 33269 | 298238.20 | 6128033.26 |
| 33271 | 296404.77 | 6128349.19 |
| 33271 | 296399.29 | 6128309.40 |
| 33271 | 296388.92 | 6128250.01 |
| 33272 | 297211.13 | 6127956.78 |
| 33273 | 296037.28 | 6126032.65 |
| 33273 | 296079.77 | 6126037.81 |
| 33275 | 295153.19 | 6128300.57 |
| 33275 | 295153.05 | 6128298.76 |
| 33275 | 295152.87 | 6128296.55 |
| 33277 | 295408.15 | 6126323.36 |
| 33277 | 295409.94 | 6126310.95 |
| 33277 | 295413.92 | 6126264.65 |
| 33277 | 295415.67 | 6126249.07 |
| 33279 | 296072.16 | 6125369.82 |
| 33279 | 296070.95 | 6125348.83 |
| 33280 | 295720.32 | 6124993.56 |
| 33281 | 296606.39 | 6128802.71 |
| 33281 | 296639.73 | 6128794.96 |
| 33282 | 295512.98 | 6125477.52 |

|       |           |            |
|-------|-----------|------------|
| 33283 | 298682.99 | 6128022.86 |
| 33283 | 298683.84 | 6128026.83 |
| 33283 | 298701.33 | 6128052.15 |
| 33283 | 298719.64 | 6128128.40 |
| 33285 | 295426.54 | 6128463.95 |
| 33285 | 295434.35 | 6128499.42 |
| 33285 | 295443.04 | 6128538.94 |
| 33286 | 295574.58 | 6126883.65 |
| 33287 | 296316.94 | 6127832.58 |
| 33287 | 296333.13 | 6127936.45 |
| 33288 | 296123.09 | 6126256.44 |
| 33288 | 296119.96 | 6126283.54 |
| 33289 | 294744.11 | 6128012.42 |
| 33290 | 296880.01 | 6126093.14 |
| 33290 | 296851.82 | 6126080.73 |
| 33290 | 296834.95 | 6126074.53 |
| 33290 | 296814.23 | 6126071.53 |
| 33291 | 297000.51 | 6128045.59 |
| 33292 | 296780.36 | 6126194.96 |
| 33292 | 296779.01 | 6126135.58 |
| 33293 | 296016.68 | 6126646.52 |
| 33293 | 296027.73 | 6126550.54 |
| 33295 | 295615.67 | 6126597.99 |
| 33295 | 295619.74 | 6126567.96 |
| 33296 | 296092.30 | 6126643.33 |
| 33296 | 296089.44 | 6126626.03 |
| 33296 | 296085.66 | 6126603.99 |
| 33296 | 296084.50 | 6126589.15 |
| 33296 | 296086.55 | 6126560.34 |
| 33299 | 294062.12 | 6125129.21 |
| 33302 | 295280.50 | 6125174.32 |
| 33302 | 295280.04 | 6125160.88 |
| 33302 | 295277.95 | 6125090.29 |
| 33302 | 295314.22 | 6125089.65 |
| 33304 | 294680.25 | 6125614.72 |
| 33304 | 294688.82 | 6125535.58 |
| 33304 | 294692.34 | 6125504.88 |
| 33306 | 295955.27 | 6125583.20 |
| 33306 | 295968.70 | 6125589.85 |
| 33307 | 294345.72 | 6124921.66 |
| 33307 | 294341.21 | 6124923.25 |
| 33309 | 295598.54 | 6125822.70 |
| 33309 | 295609.46 | 6125745.92 |
| 33313 | 295856.99 | 6128036.62 |
| 33314 | 295899.34 | 6126379.35 |
| 33314 | 295905.09 | 6126331.36 |
| 33315 | 296475.96 | 6126227.12 |
| 33317 | 295769.30 | 6125553.96 |
| 33318 | 295364.63 | 6126736.84 |
| 33321 | 294009.25 | 6127939.79 |

|       |           |            |
|-------|-----------|------------|
| 33322 | 294755.67 | 6127688.91 |
| 33322 | 294744.49 | 6127689.08 |
| 33322 | 294727.23 | 6127689.90 |
| 33322 | 294663.18 | 6127693.20 |
| 33324 | 294406.24 | 6124744.04 |
| 33332 | 299144.47 | 6127546.67 |
| 33332 | 299160.89 | 6127558.09 |
| 33333 | 295918.24 | 6128391.83 |
| 33333 | 295912.31 | 6128342.12 |
| 33335 | 294650.05 | 6127953.48 |
| 33335 | 294647.90 | 6127987.99 |
| 33336 | 295720.71 | 6125128.10 |
| 33336 | 295739.15 | 6125124.19 |
| 33336 | 295757.75 | 6125120.61 |
| 33337 | 295646.75 | 6126362.78 |
| 33337 | 295543.79 | 6126348.98 |
| 33338 | 295167.40 | 6126131.23 |
| 33339 | 297785.63 | 6126853.16 |
| 33339 | 297788.12 | 6126852.67 |
| 33340 | 296562.14 | 6128812.55 |
| 33341 | 298907.76 | 6128216.07 |
| 33342 | 295651.51 | 6125537.27 |
| 33342 | 295646.30 | 6125536.53 |
| 33344 | 296018.28 | 6125810.83 |
| 33344 | 296070.43 | 6125817.42 |
| 33345 | 296170.66 | 6125297.64 |
| 33346 | 295180.76 | 6128336.67 |
| 33346 | 295195.29 | 6128335.67 |
| 33346 | 295211.48 | 6128334.71 |
| 33346 | 295235.45 | 6128333.33 |
| 33346 | 295270.99 | 6128331.07 |
| 33346 | 295275.48 | 6128321.11 |
| 33347 | 293870.19 | 6127040.22 |
| 33347 | 293869.76 | 6127040.37 |
| 33347 | 293833.54 | 6127052.92 |
| 33347 | 293827.34 | 6127053.55 |
| 33347 | 293772.43 | 6127056.76 |
| 33348 | 296090.93 | 6126521.30 |
| 33349 | 296009.12 | 6125775.23 |
| 33349 | 296042.86 | 6125779.42 |
| 33349 | 296078.81 | 6125783.86 |
| 33351 | 296087.46 | 6125853.94 |
| 33351 | 296023.40 | 6125845.71 |
| 33352 | 295663.22 | 6127253.23 |
| 33353 | 295500.47 | 6127684.96 |
| 33359 | 295684.03 | 6127256.05 |
| 33360 | 296005.42 | 6126525.73 |
| 33360 | 296020.80 | 6126527.55 |
| 33360 | 296030.23 | 6126528.67 |
| 33360 | 296074.43 | 6126533.90 |

|       |           |            |
|-------|-----------|------------|
| 33361 | 295203.16 | 6125918.59 |
| 33361 | 295207.71 | 6125882.88 |
| 33363 | 295628.13 | 6125681.31 |
| 33363 | 295626.43 | 6125681.09 |
| 33364 | 295768.40 | 6126406.80 |
| 33364 | 295771.13 | 6126385.91 |
| 33364 | 295772.48 | 6126375.56 |
| 33368 | 295638.55 | 6125498.10 |
| 33368 | 295633.92 | 6125534.20 |
| 33369 | 294676.88 | 6127863.42 |
| 33370 | 294372.94 | 6127320.82 |
| 33370 | 294433.68 | 6127315.51 |
| 33373 | 294793.01 | 6125043.10 |
| 33374 | 293246.28 | 6127242.16 |
| 33374 | 293184.93 | 6127278.70 |
| 33375 | 297634.12 | 6127241.97 |
| 33377 | 295348.19 | 6125807.11 |
| 33377 | 295347.22 | 6125814.62 |
| 33377 | 295345.52 | 6125827.78 |
| 33377 | 295341.14 | 6125868.54 |
| 33377 | 295336.46 | 6125910.90 |
| 33378 | 294204.02 | 6124931.06 |
| 33378 | 294185.80 | 6124883.46 |
| 33378 | 294176.14 | 6124857.81 |
| 33380 | 294308.80 | 6125579.54 |
| 33380 | 294373.53 | 6125555.88 |
| 33381 | 295196.06 | 6125936.51 |
| 33382 | 295624.63 | 6125545.67 |
| 33384 | 296907.75 | 6127382.86 |
| 33384 | 296915.57 | 6127386.38 |
| 33385 | 294304.92 | 6126078.69 |
| 33385 | 294322.00 | 6126125.60 |
| 33385 | 294327.24 | 6126140.89 |
| 33385 | 294332.02 | 6126161.05 |
| 33387 | 295148.89 | 6126289.76 |
| 33387 | 295134.02 | 6126287.92 |
| 33388 | 295270.70 | 6126543.80 |
| 33388 | 295275.08 | 6126503.99 |
| 33388 | 295281.27 | 6126459.11 |
| 33389 | 295087.61 | 6126829.62 |
| 33390 | 296660.99 | 6126556.39 |
| 33390 | 296672.62 | 6126500.92 |
| 33394 | 294363.92 | 6124709.22 |
| 33398 | 295679.28 | 6127983.18 |
| 33399 | 295553.80 | 6127258.92 |
| 33399 | 295553.65 | 6127260.94 |
| 33399 | 295535.44 | 6127262.34 |
| 33400 | 295239.83 | 6126182.68 |
| 33400 | 295283.51 | 6126188.14 |
| 33401 | 296581.28 | 6125993.28 |

|       |           |            |
|-------|-----------|------------|
| 33402 | 294696.28 | 6124656.17 |
| 33402 | 294719.13 | 6124647.66 |
| 33402 | 294749.08 | 6124732.98 |
| 33403 | 297425.55 | 6126699.79 |
| 33404 | 296819.43 | 6126620.74 |
| 33405 | 295526.55 | 6126342.83 |
| 33405 | 295523.62 | 6126342.48 |
| 33408 | 293914.14 | 6127844.00 |
| 33409 | 295721.36 | 6126749.97 |
| 33409 | 295727.54 | 6126705.05 |
| 33409 | 295732.99 | 6126657.41 |
| 33410 | 295341.48 | 6125940.87 |
| 33410 | 295358.13 | 6125943.02 |
| 33410 | 295386.67 | 6125946.69 |
| 33410 | 295412.13 | 6125949.97 |
| 33410 | 295446.02 | 6125954.29 |
| 33411 | 295307.81 | 6126310.81 |
| 33411 | 295336.96 | 6126314.32 |
| 33411 | 295377.25 | 6126319.37 |
| 33411 | 295402.33 | 6126322.61 |
| 33411 | 295408.15 | 6126323.36 |
| 33412 | 294421.85 | 6124572.03 |
| 33413 | 297151.33 | 6127452.74 |
| 33413 | 297154.20 | 6127447.49 |
| 33413 | 297115.18 | 6127360.57 |
| 33414 | 295084.59 | 6128148.51 |
| 33414 | 295077.81 | 6128081.98 |
| 33416 | 295661.16 | 6125838.39 |
| 33418 | 295417.26 | 6126204.03 |
| 33418 | 295419.14 | 6126204.33 |
| 33418 | 295532.72 | 6126219.56 |
| 33419 | 297440.38 | 6126536.17 |
| 33419 | 297430.19 | 6126640.94 |
| 33420 | 295417.26 | 6126204.03 |
| 33420 | 295425.67 | 6126137.25 |
| 33420 | 295430.95 | 6126087.62 |
| 33421 | 298209.97 | 6127991.95 |
| 33421 | 298193.18 | 6127990.39 |
| 33421 | 298164.81 | 6127987.91 |
| 33421 | 298115.75 | 6127983.64 |
| 33422 | 296484.43 | 6127925.73 |
| 33424 | 295251.15 | 6124782.28 |
| 33424 | 295284.47 | 6124802.32 |
| 33425 | 298728.22 | 6127975.74 |
| 33427 | 295013.67 | 6126396.73 |
| 33429 | 295148.89 | 6126289.76 |
| 33429 | 295149.44 | 6126284.75 |
| 33429 | 295161.98 | 6126177.45 |
| 33431 | 295208.74 | 6126560.63 |
| 33432 | 296051.21 | 6126346.32 |



|       |           |            |
|-------|-----------|------------|
| 33432 | 296057.21 | 6126295.55 |
| 33433 | 295278.36 | 6126568.73 |
| 33433 | 295380.80 | 6126580.68 |
| 33434 | 295156.84 | 6126294.29 |
| 33434 | 295157.22 | 6126290.83 |
| 33434 | 295169.43 | 6126180.73 |
| 33435 | 297256.28 | 6126482.27 |
| 33435 | 297269.40 | 6126488.44 |
| 33435 | 297284.04 | 6126495.40 |
| 33435 | 297327.76 | 6126507.62 |
| 33435 | 297329.29 | 6126508.00 |
| 33436 | 294413.57 | 6125541.10 |
| 33436 | 294470.22 | 6125520.92 |
| 33437 | 297990.22 | 6127514.48 |
| 33437 | 297995.61 | 6127514.54 |
| 33437 | 298003.68 | 6127516.83 |
| 33437 | 298012.26 | 6127516.58 |
| 33437 | 298036.94 | 6127507.74 |
| 33439 | 295411.50 | 6128366.49 |
| 33440 | 294737.86 | 6124788.35 |
| 33440 | 294748.85 | 6124785.07 |
| 33442 | 293970.07 | 6125048.58 |
| 33444 | 295585.28 | 6125188.71 |
| 33445 | 295692.90 | 6128592.36 |
| 33447 | 295294.49 | 6126323.18 |
| 33447 | 295295.13 | 6126314.27 |
| 33449 | 294557.60 | 6126951.83 |
| 33450 | 295641.87 | 6126487.64 |
| 33450 | 295675.04 | 6126492.20 |
| 33450 | 295744.09 | 6126502.05 |
| 33453 | 298449.59 | 6127522.72 |
| 33453 | 298475.05 | 6127577.59 |
| 33453 | 298491.05 | 6127616.40 |
| 33454 | 295813.13 | 6126130.22 |
| 33454 | 295865.48 | 6126137.63 |
| 33454 | 295888.34 | 6126140.79 |
| 33454 | 295924.29 | 6126145.84 |
| 33455 | 295391.14 | 6128236.26 |
| 33459 | 297433.87 | 6127387.19 |
| 33460 | 294446.40 | 6125238.94 |
| 33460 | 294422.00 | 6125172.94 |
| 33460 | 294411.82 | 6125142.97 |
| 33460 | 294405.99 | 6125128.06 |
| 33461 | 296103.80 | 6125893.88 |
| 33461 | 296103.06 | 6125900.17 |
| 33461 | 296091.16 | 6126006.78 |
| 33462 | 295650.34 | 6128592.88 |
| 33463 | 293764.69 | 6126774.53 |
| 33464 | 293991.93 | 6127223.29 |
| 33464 | 294049.59 | 6127216.72 |

|       |           |            |
|-------|-----------|------------|
| 33464 | 294083.20 | 6127212.92 |
| 33470 | 293834.91 | 6126758.37 |
| 33472 | 294380.01 | 6129164.97 |
| 33472 | 294324.24 | 6129142.37 |
| 33474 | 294123.66 | 6126089.06 |
| 33474 | 294152.69 | 6126096.64 |
| 33474 | 294164.77 | 6126099.79 |
| 33476 | 293690.77 | 6126789.13 |
| 33480 | 295254.83 | 6126697.99 |
| 33480 | 295257.07 | 6126672.05 |
| 33480 | 295258.76 | 6126653.62 |
| 33480 | 295262.98 | 6126620.60 |
| 33481 | 297944.76 | 6127296.42 |
| 33481 | 297939.73 | 6127296.89 |
| 33482 | 298341.97 | 6127979.36 |
| 33483 | 294499.97 | 6127153.87 |
| 33484 | 295925.97 | 6127235.91 |
| 33485 | 293155.34 | 6126824.43 |
| 33485 | 293071.37 | 6126819.15 |
| 33487 | 295513.42 | 6128156.46 |
| 33488 | 293544.80 | 6127967.19 |
| 33489 | 295888.27 | 6127240.31 |
| 33490 | 296026.59 | 6125459.98 |
| 33490 | 296028.01 | 6125479.50 |
| 33490 | 296028.72 | 6125502.43 |
| 33490 | 296023.10 | 6125546.92 |
| 33490 | 296021.27 | 6125561.42 |
| 33491 | 295240.76 | 6126845.69 |
| 33491 | 295253.34 | 6126732.61 |
| 33493 | 296008.32 | 6125105.62 |
| 33493 | 296010.75 | 6125153.03 |
| 33493 | 296012.90 | 6125167.66 |
| 33493 | 296013.77 | 6125193.63 |
| 33495 | 295844.18 | 6125787.92 |
| 33495 | 295848.59 | 6125762.65 |
| 33495 | 295854.45 | 6125735.15 |
| 33496 | 294888.67 | 6125981.11 |
| 33497 | 294337.54 | 6126976.12 |
| 33497 | 294350.36 | 6127053.04 |
| 33498 | 293682.09 | 6126746.13 |
| 33498 | 293681.49 | 6126741.05 |
| 33498 | 293647.88 | 6126745.48 |
| 33498 | 293654.49 | 6126791.81 |
| 33499 | 296368.27 | 6125100.65 |
| 33500 | 293749.15 | 6127969.68 |
| 33500 | 293686.58 | 6127869.98 |
| 33502 | 296649.71 | 6126143.88 |
| 33502 | 296607.25 | 6126142.60 |
| 33502 | 296592.75 | 6126143.14 |
| 33503 | 295305.07 | 6125399.76 |

|       |           |            |
|-------|-----------|------------|
| 33504 | 296766.08 | 6126350.18 |
| 33505 | 295494.46 | 6125659.31 |
| 33506 | 293729.85 | 6126782.26 |
| 33508 | 296459.60 | 6126110.00 |
| 33508 | 296461.55 | 6126132.49 |
| 33508 | 296462.45 | 6126143.39 |
| 33508 | 296465.43 | 6126182.22 |
| 33509 | 296014.42 | 6126666.41 |
| 33510 | 293795.30 | 6126726.68 |
| 33510 | 293827.83 | 6126722.36 |
| 33510 | 293828.43 | 6126727.43 |
| 33511 | 294679.32 | 6126467.04 |
| 33513 | 295613.35 | 6126617.81 |
| 33513 | 295610.21 | 6126637.02 |
| 33513 | 295602.79 | 6126695.43 |
| 33514 | 295331.29 | 6125939.58 |
| 33514 | 295324.51 | 6125938.65 |
| 33514 | 295292.52 | 6125935.16 |
| 33514 | 295267.45 | 6125932.94 |
| 33514 | 295227.12 | 6125929.22 |
| 33514 | 295207.02 | 6125927.72 |
| 33518 | 294825.76 | 6126406.59 |
| 33519 | 297849.29 | 6127766.24 |
| 33519 | 297890.38 | 6127759.48 |
| 33522 | 296419.00 | 6126010.82 |
| 33522 | 296543.96 | 6125997.21 |
| 33523 | 294279.06 | 6124903.34 |
| 33523 | 294260.84 | 6124855.75 |
| 33524 | 297909.92 | 6127175.19 |
| 33524 | 297938.83 | 6127292.96 |
| 33524 | 297939.73 | 6127296.89 |
| 33524 | 297940.15 | 6127298.71 |
| 33526 | 295218.67 | 6125790.16 |
| 33526 | 295219.56 | 6125782.60 |
| 33526 | 295226.12 | 6125783.41 |
| 33526 | 295237.95 | 6125784.87 |
| 33526 | 295335.64 | 6125796.88 |
| 33527 | 295033.41 | 6124633.29 |
| 33528 | 294492.25 | 6126971.04 |
| 33529 | 295200.34 | 6126052.20 |
| 33529 | 295317.23 | 6126067.13 |
| 33531 | 293944.49 | 6127977.21 |
| 33531 | 293929.86 | 6127993.67 |
| 33532 | 295524.72 | 6125251.91 |
| 33533 | 295611.97 | 6128661.11 |
| 33534 | 296225.29 | 6127536.66 |
| 33538 | 298941.52 | 6128363.74 |
| 33539 | 298920.24 | 6128291.20 |
| 33540 | 298909.63 | 6128254.93 |
| 33541 | 298968.29 | 6128395.27 |

|       |           |            |
|-------|-----------|------------|
| 33542 | 298930.81 | 6128327.49 |
| 33543 | 295157.22 | 6126290.83 |
| 33543 | 295242.20 | 6126302.16 |
| 33543 | 295269.83 | 6126305.62 |
| 33544 | 295585.37 | 6125973.55 |
| 33544 | 295593.02 | 6125974.34 |
| 33544 | 295637.20 | 6125980.51 |
| 33544 | 295670.90 | 6125985.04 |
| 33546 | 293513.67 | 6128128.37 |
| 33546 | 293491.74 | 6128128.97 |
| 33547 | 294143.21 | 6125964.12 |
| 33548 | 295653.21 | 6125396.27 |
| 33548 | 295651.66 | 6125396.09 |
| 33548 | 295649.56 | 6125395.85 |
| 33548 | 295661.28 | 6125314.49 |
| 33550 | 295157.45 | 6124782.48 |
| 33550 | 295159.29 | 6124823.29 |
| 33551 | 296015.35 | 6125600.50 |
| 33551 | 295999.30 | 6125725.95 |
| 33552 | 296467.60 | 6125695.83 |
| 33552 | 296492.54 | 6125694.74 |
| 33552 | 296493.45 | 6125716.66 |
| 33552 | 296495.87 | 6125759.01 |
| 33552 | 296499.17 | 6125811.73 |
| 33553 | 294286.12 | 6127202.31 |
| 33553 | 294342.13 | 6127197.29 |
| 33553 | 294350.35 | 6127196.40 |
| 33553 | 294353.72 | 6127246.56 |
| 33553 | 294357.24 | 6127295.47 |
| 33554 | 295387.93 | 6126437.58 |
| 33554 | 295401.66 | 6126327.99 |
| 33554 | 295402.33 | 6126322.61 |
| 33555 | 294599.47 | 6124827.09 |
| 33555 | 294589.38 | 6124799.76 |
| 33558 | 295476.42 | 6125805.45 |
| 33558 | 295481.37 | 6125767.00 |
| 33559 | 294696.93 | 6125447.93 |
| 33559 | 294647.76 | 6125463.85 |
| 33559 | 294577.51 | 6125486.61 |
| 33560 | 298076.63 | 6127923.54 |
| 33560 | 298070.20 | 6127916.24 |
| 33560 | 298040.54 | 6127870.07 |
| 33560 | 298023.74 | 6127843.45 |
| 33561 | 295099.83 | 6128293.22 |
| 33561 | 295098.92 | 6128287.92 |
| 33561 | 295098.47 | 6128283.65 |
| 33561 | 295090.74 | 6128208.61 |
| 33561 | 295087.78 | 6128180.50 |
| 33561 | 295086.74 | 6128170.11 |
| 33561 | 295086.19 | 6128164.62 |

|       |           |            |
|-------|-----------|------------|
| 33562 | 295472.06 | 6125835.14 |
| 33562 | 295469.98 | 6125848.51 |
| 33562 | 295468.56 | 6125857.98 |
| 33562 | 295462.02 | 6125906.90 |
| 33562 | 295461.24 | 6125909.28 |
| 33562 | 295460.59 | 6125914.72 |
| 33562 | 295458.63 | 6125930.08 |
| 33562 | 295457.03 | 6125942.19 |
| 33563 | 295727.56 | 6125856.91 |
| 33563 | 295727.11 | 6125859.76 |
| 33563 | 295725.57 | 6125869.54 |
| 33563 | 295717.03 | 6125923.67 |
| 33565 | 296152.90 | 6126002.51 |
| 33565 | 296159.21 | 6125933.57 |
| 33565 | 296163.52 | 6125916.11 |
| 33566 | 296611.35 | 6126207.07 |
| 33567 | 296862.71 | 6126231.26 |
| 33567 | 296921.01 | 6126256.21 |
| 33568 | 295468.08 | 6128424.01 |
| 33569 | 295590.71 | 6125842.21 |
| 33569 | 295589.28 | 6125851.81 |
| 33571 | 295007.46 | 6126022.21 |
| 33571 | 295007.46 | 6126054.56 |
| 33571 | 295006.38 | 6126091.76 |
| 33573 | 295921.56 | 6125368.29 |
| 33573 | 295972.34 | 6125366.52 |
| 33574 | 295553.80 | 6127258.92 |
| 33575 | 296927.86 | 6126329.60 |
| 33575 | 296905.00 | 6126319.35 |
| 33575 | 296830.51 | 6126286.23 |
| 33576 | 293166.75 | 6131216.43 |
| 33576 | 293173.48 | 6131205.03 |
| 33576 | 293164.84 | 6131196.42 |
| 33578 | 298247.53 | 6127834.53 |
| 33579 | 295911.69 | 6125289.40 |
| 33579 | 295955.31 | 6125287.27 |
| 33580 | 295915.43 | 6126389.26 |
| 33580 | 295945.38 | 6126392.94 |
| 33580 | 296012.32 | 6126401.89 |
| 33581 | 297219.24 | 6126555.58 |
| 33582 | 293780.94 | 6125405.48 |
| 33582 | 293774.04 | 6125409.31 |
| 33584 | 294364.20 | 6127176.60 |
| 33584 | 294373.34 | 6127293.73 |
| 33586 | 297853.15 | 6127812.70 |
| 33586 | 297905.39 | 6127804.09 |
| 33586 | 297979.86 | 6127791.53 |
| 33588 | 295022.77 | 6124903.80 |
| 33589 | 296685.52 | 6126066.31 |
| 33589 | 296642.62 | 6126064.08 |

|       |           |            |
|-------|-----------|------------|
| 33589 | 296604.19 | 6126063.44 |
| 33589 | 296570.88 | 6126066.73 |
| 33590 | 293501.18 | 6126948.70 |
| 33591 | 295197.69 | 6128029.87 |
| 33592 | 294523.15 | 6126038.24 |
| 33592 | 294521.19 | 6126016.29 |
| 33592 | 294520.96 | 6126013.38 |
| 33595 | 295020.95 | 6128025.46 |
| 33596 | 295475.84 | 6126749.44 |
| 33596 | 295461.28 | 6126871.08 |
| 33598 | 296611.45 | 6126460.40 |
| 33598 | 296621.94 | 6126405.89 |
| 33598 | 296631.35 | 6126354.80 |
| 33599 | 295971.72 | 6127870.32 |
| 33599 | 295987.06 | 6127832.95 |
| 33599 | 295976.41 | 6127741.81 |
| 33599 | 295975.82 | 6127736.84 |
| 33600 | 296170.07 | 6125903.77 |
| 33600 | 296179.62 | 6125904.92 |
| 33600 | 296209.00 | 6125909.12 |
| 33600 | 296267.68 | 6125915.84 |
| 33601 | 295970.13 | 6125213.14 |
| 33602 | 295868.02 | 6125706.89 |
| 33603 | 293923.57 | 6127062.49 |
| 33603 | 293921.74 | 6127088.99 |
| 33603 | 293920.01 | 6127119.37 |
| 33603 | 293918.50 | 6127130.84 |
| 33603 | 293917.33 | 6127147.33 |
| 33604 | 297920.68 | 6127169.14 |
| 33605 | 295916.70 | 6126270.05 |
| 33605 | 296041.48 | 6126286.92 |
| 33607 | 295173.80 | 6128526.71 |
| 33607 | 295150.38 | 6128528.30 |
| 33608 | 294443.36 | 6126882.06 |
| 33608 | 294449.87 | 6126928.13 |
| 33608 | 294457.43 | 6126982.92 |
| 33610 | 295133.25 | 6128032.89 |
| 33611 | 295148.30 | 6127468.55 |
| 33611 | 295149.54 | 6127496.15 |
| 33611 | 295150.91 | 6127523.61 |
| 33611 | 295151.87 | 6127561.80 |
| 33615 | 295809.91 | 6128158.37 |
| 33615 | 295815.67 | 6128157.62 |
| 33616 | 294478.97 | 6127528.50 |
| 33617 | 293524.40 | 6127319.88 |
| 33617 | 293587.77 | 6127323.68 |
| 33617 | 293588.79 | 6127318.75 |
| 33619 | 294810.45 | 6126699.41 |
| 33619 | 294808.60 | 6126699.36 |
| 33619 | 294794.76 | 6126698.68 |

|       |           |            |
|-------|-----------|------------|
| 33619 | 294770.33 | 6126706.23 |
| 33619 | 294686.50 | 6126720.93 |
| 33620 | 294720.41 | 6126652.80 |
| 33620 | 294765.79 | 6126657.44 |
| 33620 | 294808.35 | 6126661.83 |
| 33622 | 295936.87 | 6127979.64 |
| 33624 | 295319.30 | 6125371.07 |
| 33625 | 294413.10 | 6126639.58 |
| 33625 | 294384.87 | 6126641.87 |
| 33625 | 294306.05 | 6126655.99 |
| 33625 | 294301.16 | 6126656.84 |
| 33628 | 296102.29 | 6126319.88 |
| 33630 | 298588.87 | 6129014.58 |
| 33631 | 294869.13 | 6124690.77 |
| 33631 | 294964.06 | 6124657.00 |
| 33634 | 297085.01 | 6126530.18 |
| 33638 | 294296.72 | 6125413.72 |
| 33640 | 295081.70 | 6127021.04 |
| 33640 | 295199.85 | 6127032.98 |
| 33642 | 295092.26 | 6126836.18 |
| 33642 | 295220.74 | 6126850.70 |
| 33642 | 295228.14 | 6126851.54 |
| 33643 | 296685.06 | 6126388.96 |
| 33643 | 296674.88 | 6126437.87 |
| 33643 | 296667.98 | 6126471.18 |
| 33643 | 296664.52 | 6126487.70 |
| 33645 | 295851.47 | 6124979.93 |
| 33645 | 295853.09 | 6124979.89 |
| 33645 | 295867.37 | 6124979.52 |
| 33645 | 295906.71 | 6124976.19 |
| 33645 | 295908.30 | 6124976.06 |
| 33645 | 295915.83 | 6124975.35 |
| 33645 | 295938.65 | 6124972.19 |
| 33645 | 295954.72 | 6124964.85 |
| 33645 | 295990.98 | 6124942.22 |
| 33647 | 296879.27 | 6127377.06 |
| 33647 | 296851.56 | 6127238.20 |
| 33648 | 296852.97 | 6127237.16 |
| 33650 | 296058.55 | 6126284.65 |
| 33650 | 296072.09 | 6126164.45 |
| 33652 | 297934.59 | 6127852.12 |
| 33652 | 297961.92 | 6127856.33 |
| 33652 | 297966.12 | 6127858.36 |
| 33652 | 297972.05 | 6127862.92 |
| 33652 | 297990.81 | 6127879.44 |
| 33652 | 298005.87 | 6127893.02 |
| 33652 | 298029.07 | 6127914.58 |
| 33653 | 294635.59 | 6125030.11 |
| 33653 | 294727.23 | 6124998.46 |
| 33654 | 294934.45 | 6126690.30 |

|       |           |            |
|-------|-----------|------------|
| 33654 | 294931.51 | 6126741.67 |
| 33654 | 294928.73 | 6126774.62 |
| 33654 | 294923.27 | 6126826.74 |
| 33656 | 295530.72 | 6127190.27 |
| 33657 | 295995.35 | 6127055.41 |
| 33668 | 294812.38 | 6126420.45 |
| 33668 | 294817.42 | 6126435.95 |
| 33668 | 294822.11 | 6126449.70 |
| 33668 | 294827.54 | 6126469.86 |
| 33668 | 294832.18 | 6126490.79 |
| 33668 | 294834.90 | 6126505.69 |
| 33668 | 294834.12 | 6126520.03 |
| 33668 | 294832.95 | 6126537.47 |
| 33669 | 295300.24 | 6125513.80 |
| 33669 | 295309.60 | 6125553.55 |
| 33670 | 294290.96 | 6125473.31 |
| 33670 | 294323.88 | 6125461.27 |
| 33670 | 294388.11 | 6125438.01 |
| 33673 | 293681.65 | 6126726.56 |
| 33682 | 296770.76 | 6128144.82 |
| 33682 | 296822.20 | 6128139.85 |
| 33687 | 298923.59 | 6129109.64 |
| 33689 | 295036.57 | 6124379.24 |
| 33690 | 296507.36 | 6128177.74 |
| 33690 | 296500.90 | 6128142.28 |
| 33690 | 296498.44 | 6128126.10 |
| 33690 | 296496.25 | 6128113.20 |
| 33690 | 296493.23 | 6128098.66 |
| 33690 | 296485.81 | 6128053.24 |
| 33691 | 296431.43 | 6128187.24 |
| 33691 | 296425.40 | 6128152.40 |
| 33691 | 296422.94 | 6128136.22 |
| 33691 | 296420.75 | 6128123.32 |
| 33691 | 296417.73 | 6128108.78 |
| 33691 | 296410.31 | 6128063.36 |
| 33692 | 296469.04 | 6128181.77 |
| 33692 | 296463.02 | 6128146.93 |
| 33692 | 296460.55 | 6128130.74 |
| 33692 | 296458.36 | 6128117.85 |
| 33692 | 296455.35 | 6128103.31 |
| 33692 | 296447.92 | 6128057.89 |
| 33693 | 296544.81 | 6128172.19 |
| 33693 | 296538.79 | 6128137.36 |
| 33693 | 296536.32 | 6128121.17 |
| 33693 | 296534.13 | 6128108.28 |
| 33693 | 296531.12 | 6128093.74 |
| 33693 | 296523.70 | 6128048.32 |
| 33694 | 294211.45 | 6125627.20 |
| 33695 | 296583.11 | 6128165.36 |
| 33695 | 296577.09 | 6128130.52 |



|       |           |            |
|-------|-----------|------------|
| 33695 | 296574.62 | 6128114.34 |
| 33695 | 296572.43 | 6128101.45 |
| 33695 | 296569.42 | 6128086.91 |
| 33695 | 296562.00 | 6128041.48 |
| 33697 | 294723.22 | 6126193.78 |
| 33698 | 297088.41 | 6127477.69 |
| 33699 | 293934.76 | 6126573.23 |
| 33699 | 293934.83 | 6126554.02 |
| 33700 | 298543.17 | 6127200.69 |
| 33700 | 298539.66 | 6127204.34 |
| 33700 | 298552.66 | 6127215.67 |
| 33700 | 298548.67 | 6127216.38 |
| 33700 | 298514.85 | 6127222.34 |
| 33702 | 298914.28 | 6129052.69 |
| 33703 | 298905.43 | 6129013.65 |
| 33704 | 296554.70 | 6127429.92 |
| 33704 | 296565.07 | 6127438.10 |
| 33704 | 296645.41 | 6127503.28 |
| 33705 | 298411.21 | 6129048.18 |
| 33706 | 294373.71 | 6125691.45 |
| 33706 | 294418.01 | 6125681.69 |
| 33708 | 296263.87 | 6125928.96 |
| 33708 | 296174.05 | 6125917.37 |
| 33708 | 296163.52 | 6125916.11 |
| 33709 | 298144.71 | 6127654.25 |
| 33709 | 298148.75 | 6127660.59 |
| 33710 | 295650.89 | 6125446.04 |
| 33710 | 295655.09 | 6125415.46 |
| 33711 | 293991.63 | 6125870.26 |
| 33711 | 294064.96 | 6126010.22 |
| 33712 | 295703.11 | 6128000.25 |
| 33712 | 295710.48 | 6128056.77 |
| 33712 | 295752.94 | 6128051.05 |
| 33712 | 295745.75 | 6127997.52 |
| 33712 | 295780.10 | 6127993.05 |
| 33712 | 295788.39 | 6128046.35 |
| 33712 | 295799.71 | 6128044.81 |
| 33713 | 294797.56 | 6126002.22 |
| 33713 | 294813.11 | 6126001.81 |
| 33713 | 294839.99 | 6126001.46 |
| 33713 | 294878.10 | 6126000.96 |
| 33713 | 294885.44 | 6126000.44 |
| 33713 | 294909.33 | 6125998.75 |
| 33713 | 294917.92 | 6125997.80 |
| 33715 | 294987.66 | 6128402.94 |
| 33715 | 294986.44 | 6128392.87 |
| 33716 | 296118.47 | 6125744.97 |
| 33716 | 296127.69 | 6125665.63 |
| 33716 | 296133.24 | 6125611.14 |
| 33717 | 294800.46 | 6127906.08 |

|       |           |            |
|-------|-----------|------------|
| 33717 | 294818.89 | 6127905.17 |
| 33718 | 297587.62 | 6126670.24 |
| 33718 | 297583.33 | 6126642.97 |
| 33718 | 297578.92 | 6126617.01 |
| 33718 | 297573.13 | 6126582.99 |
| 33718 | 297566.95 | 6126546.63 |
| 33718 | 297600.49 | 6126551.98 |
| 33720 | 297509.10 | 6127461.08 |
| 33720 | 297517.61 | 6127464.85 |
| 33720 | 297524.89 | 6127472.45 |
| 33720 | 297525.40 | 6127473.05 |
| 33720 | 297565.53 | 6127519.46 |
| 33720 | 297569.06 | 6127527.09 |
| 33720 | 297575.90 | 6127566.48 |
| 33720 | 297575.96 | 6127566.82 |
| 33720 | 297576.04 | 6127567.15 |
| 33720 | 297576.13 | 6127567.48 |
| 33720 | 297576.22 | 6127567.81 |
| 33720 | 297576.33 | 6127568.13 |
| 33720 | 297576.45 | 6127568.45 |
| 33720 | 297576.58 | 6127568.77 |
| 33720 | 297576.73 | 6127569.08 |
| 33720 | 297576.88 | 6127569.38 |
| 33720 | 297577.04 | 6127569.68 |
| 33720 | 297577.21 | 6127569.98 |
| 33720 | 297577.40 | 6127570.27 |
| 33720 | 297577.59 | 6127570.55 |
| 33720 | 297577.79 | 6127570.82 |
| 33720 | 297578.00 | 6127571.09 |
| 33720 | 297578.22 | 6127571.35 |
| 33720 | 297585.64 | 6127579.84 |
| 33721 | 294154.91 | 6124800.75 |
| 33721 | 294142.20 | 6124764.81 |
| 33722 | 295863.61 | 6126637.38 |
| 33722 | 295869.16 | 6126638.30 |
| 33722 | 295883.75 | 6126640.73 |
| 33722 | 295932.42 | 6126646.10 |
| 33722 | 295974.44 | 6126650.56 |
| 33723 | 296731.08 | 6128003.84 |
| 33723 | 296734.05 | 6128003.51 |
| 33723 | 296754.05 | 6127993.88 |
| 33724 | 294945.12 | 6128401.23 |
| 33724 | 294945.40 | 6128404.46 |
| 33725 | 297010.04 | 6126234.10 |
| 33725 | 296960.34 | 6126212.10 |
| 33725 | 296883.90 | 6126178.30 |
| 33726 | 294561.15 | 6126742.92 |
| 33727 | 296916.10 | 6126108.80 |
| 33727 | 296996.82 | 6126145.09 |
| 33729 | 294380.95 | 6126042.43 |

|       |           |            |
|-------|-----------|------------|
| 33729 | 294438.06 | 6126025.61 |
| 33731 | 298421.39 | 6128096.74 |
| 33731 | 298432.22 | 6128112.20 |
| 33731 | 298480.66 | 6128181.49 |
| 33732 | 296140.74 | 6126174.66 |
| 33732 | 296219.43 | 6126184.22 |
| 33734 | 294229.95 | 6124773.04 |
| 33734 | 294216.44 | 6124736.99 |
| 33737 | 293979.38 | 6127478.22 |
| 33737 | 294000.15 | 6127478.32 |
| 33737 | 294026.71 | 6127479.55 |
| 33737 | 294051.17 | 6127480.60 |
| 33737 | 294075.28 | 6127481.49 |
| 33737 | 294106.43 | 6127482.20 |
| 33737 | 294129.22 | 6127483.00 |
| 33737 | 294131.76 | 6127483.09 |
| 33738 | 294127.41 | 6127421.19 |
| 33739 | 293637.54 | 6126952.24 |
| 33739 | 293644.93 | 6126955.57 |
| 33741 | 293998.70 | 6126697.79 |
| 33742 | 295435.79 | 6127060.44 |
| 33742 | 295416.17 | 6127218.82 |
| 33743 | 294691.45 | 6126349.45 |
| 33744 | 294966.48 | 6126680.67 |
| 33744 | 294976.03 | 6126680.35 |
| 33744 | 294982.94 | 6126679.86 |
| 33744 | 294983.71 | 6126679.81 |
| 33744 | 294994.27 | 6126680.43 |
| 33744 | 295034.83 | 6126684.64 |
| 33744 | 295095.74 | 6126690.71 |
| 33745 | 295859.21 | 6125147.99 |
| 33745 | 295855.15 | 6125079.69 |
| 33746 | 295378.73 | 6126597.50 |
| 33746 | 295380.80 | 6126580.68 |
| 33746 | 295390.18 | 6126504.77 |
| 33747 | 293969.07 | 6125410.40 |
| 33747 | 294022.39 | 6125507.74 |
| 33747 | 294047.60 | 6125495.33 |
| 33747 | 294049.11 | 6125497.88 |
| 33747 | 294049.89 | 6125499.25 |
| 33748 | 296040.06 | 6125885.93 |
| 33748 | 296103.80 | 6125893.88 |
| 33748 | 296146.54 | 6125899.21 |
| 33749 | 294753.73 | 6127271.55 |
| 33750 | 296909.44 | 6128219.54 |
| 33751 | 295573.96 | 6127046.18 |
| 33751 | 295671.01 | 6127060.85 |
| 33751 | 295676.66 | 6127061.55 |
| 33751 | 295681.31 | 6127060.86 |
| 33752 | 293673.04 | 6126948.01 |

|       |           |            |
|-------|-----------|------------|
| 33752 | 293679.05 | 6126952.79 |
| 33753 | 295911.70 | 6125077.76 |
| 33753 | 295911.45 | 6125071.42 |
| 33756 | 294099.23 | 6127106.83 |
| 33756 | 293983.01 | 6127120.63 |
| 33757 | 297926.42 | 6127332.15 |
| 33757 | 297920.52 | 6127333.25 |
| 33758 | 294064.93 | 6127142.82 |
| 33758 | 293960.39 | 6127154.65 |
| 33763 | 294358.78 | 6125119.01 |
| 33763 | 294345.31 | 6125083.75 |
| 33763 | 294322.21 | 6125019.89 |
| 33763 | 294312.17 | 6124993.49 |
| 33764 | 296152.28 | 6127003.99 |
| 33765 | 294505.23 | 6127462.50 |
| 33766 | 295011.45 | 6125978.77 |
| 33766 | 295054.73 | 6125965.45 |
| 33766 | 295082.28 | 6125957.43 |
| 33766 | 295110.64 | 6125949.05 |
| 33769 | 294064.80 | 6126883.57 |
| 33769 | 294030.16 | 6126887.79 |
| 33769 | 294002.49 | 6126891.02 |
| 33769 | 293958.74 | 6126896.32 |
| 33770 | 293601.08 | 6126948.31 |
| 33770 | 293608.29 | 6126958.47 |
| 33771 | 295618.60 | 6127237.18 |
| 33771 | 295717.83 | 6127230.21 |
| 33772 | 297511.12 | 6128042.55 |
| 33772 | 297494.11 | 6128043.99 |
| 33773 | 298196.48 | 6127932.82 |
| 33773 | 298235.49 | 6127936.31 |
| 33773 | 298311.83 | 6127942.66 |
| 33775 | 294769.08 | 6128146.00 |
| 33776 | 295047.17 | 6127282.22 |
| 33777 | 295157.72 | 6127766.38 |
| 33777 | 295149.08 | 6127767.18 |
| 33777 | 295106.66 | 6127770.88 |
| 33777 | 295065.80 | 6127774.14 |
| 33777 | 295035.36 | 6127776.51 |
| 33777 | 295003.04 | 6127779.25 |
| 33778 | 294245.94 | 6126863.36 |
| 33778 | 294229.52 | 6126865.41 |
| 33778 | 294164.75 | 6126872.39 |
| 33779 | 296154.14 | 6126052.27 |
| 33779 | 296233.52 | 6126062.92 |
| 33779 | 296324.44 | 6126075.19 |
| 33780 | 298328.36 | 6127916.73 |
| 33781 | 294895.43 | 6125024.82 |
| 33781 | 294979.96 | 6124995.38 |
| 33781 | 295023.19 | 6124986.34 |

|       |           |            |
|-------|-----------|------------|
| 33783 | 294776.25 | 6127263.70 |
| 33784 | 294391.25 | 6125625.45 |
| 33784 | 294443.08 | 6125605.30 |
| 33785 | 296105.39 | 6125420.29 |
| 33785 | 296116.18 | 6125333.63 |
| 33786 | 295927.50 | 6128223.84 |
| 33787 | 294942.37 | 6124990.60 |
| 33787 | 294988.07 | 6124975.05 |
| 33787 | 294997.13 | 6124972.53 |
| 33787 | 295005.55 | 6124971.90 |
| 33787 | 295023.20 | 6124971.94 |
| 33788 | 295823.89 | 6126002.40 |
| 33788 | 295828.68 | 6125968.01 |
| 33788 | 295839.12 | 6125886.33 |
| 33789 | 294219.90 | 6126834.20 |
| 33789 | 294284.39 | 6126826.82 |
| 33791 | 293563.85 | 6126903.13 |
| 33791 | 293568.82 | 6126944.07 |
| 33791 | 293570.17 | 6126955.18 |
| 33791 | 293573.47 | 6126961.77 |
| 33792 | 295954.25 | 6126148.47 |
| 33792 | 295979.77 | 6126152.23 |
| 33792 | 295999.91 | 6126155.19 |
| 33792 | 296072.09 | 6126164.45 |
| 33792 | 296114.74 | 6126169.92 |
| 33793 | 297032.79 | 6127963.76 |
| 33796 | 296341.79 | 6125329.80 |
| 33796 | 296369.25 | 6125353.83 |
| 33796 | 296406.91 | 6125384.81 |
| 33796 | 296431.87 | 6125405.40 |
| 33798 | 295830.36 | 6128274.96 |
| 33798 | 295869.37 | 6128269.68 |
| 33798 | 295912.08 | 6128263.80 |
| 33798 | 295947.31 | 6128258.98 |
| 33798 | 296007.88 | 6128251.11 |
| 33799 | 293425.90 | 6131259.82 |
| 33800 | 294420.43 | 6125642.68 |
| 33800 | 294453.88 | 6125629.44 |
| 33800 | 294476.48 | 6125620.72 |
| 33800 | 294517.46 | 6125604.78 |
| 33802 | 296236.74 | 6125091.59 |
| 33803 | 294350.70 | 6127306.28 |
| 33804 | 295973.67 | 6128481.48 |
| 33804 | 295972.70 | 6128475.31 |
| 33804 | 295971.59 | 6128466.95 |
| 33804 | 295969.00 | 6128447.08 |
| 33804 | 295966.59 | 6128427.58 |
| 33804 | 295964.26 | 6128410.52 |
| 33804 | 295961.01 | 6128386.79 |
| 33804 | 295954.52 | 6128339.69 |

|       |           |            |
|-------|-----------|------------|
| 33805 | 294966.91 | 6127782.39 |
| 33805 | 294922.69 | 6127786.05 |
| 33805 | 294854.17 | 6127791.70 |
| 33805 | 294795.88 | 6127796.55 |
| 33805 | 294786.62 | 6127797.35 |
| 33806 | 295304.47 | 6127215.03 |
| 33806 | 295303.93 | 6127219.67 |
| 33806 | 295302.08 | 6127235.28 |
| 33806 | 295301.90 | 6127237.07 |
| 33807 | 294131.09 | 6126807.25 |
| 33807 | 294196.39 | 6126800.16 |
| 33808 | 296997.01 | 6128080.28 |
| 33808 | 296996.66 | 6128077.07 |
| 33809 | 295790.12 | 6128529.63 |
| 33809 | 295792.93 | 6128533.76 |
| 33809 | 295796.48 | 6128602.03 |
| 33809 | 295796.92 | 6128610.65 |
| 33809 | 295797.32 | 6128610.63 |
| 33809 | 295846.00 | 6128607.88 |
| 33809 | 295889.46 | 6128605.43 |
| 33809 | 295971.64 | 6128600.79 |
| 33811 | 294338.38 | 6127079.71 |
| 33811 | 294270.90 | 6127087.20 |
| 33811 | 294192.10 | 6127096.42 |
| 33812 | 295321.93 | 6128433.28 |
| 33812 | 295324.30 | 6128474.39 |
| 33813 | 294317.61 | 6124913.88 |
| 33813 | 294308.75 | 6124891.52 |
| 33813 | 294290.64 | 6124843.95 |
| 33813 | 294278.10 | 6124810.68 |
| 33813 | 294260.12 | 6124761.69 |
| 33814 | 295138.47 | 6127259.49 |
| 33817 | 297894.50 | 6127596.24 |
| 33817 | 297934.51 | 6127588.44 |
| 33817 | 297969.97 | 6127581.50 |
| 33817 | 298022.31 | 6127571.12 |
| 33817 | 298050.87 | 6127565.41 |
| 33817 | 298058.12 | 6127562.53 |
| 33817 | 298064.96 | 6127558.76 |
| 33818 | 295839.66 | 6125455.14 |
| 33818 | 295881.64 | 6125460.21 |
| 33818 | 295894.51 | 6125459.57 |
| 33818 | 295914.70 | 6125458.55 |
| 33818 | 295972.48 | 6125456.24 |
| 33819 | 293294.66 | 6127348.80 |
| 33819 | 293249.64 | 6127376.65 |
| 33819 | 293203.86 | 6127404.61 |
| 33819 | 293178.02 | 6127415.38 |
| 33820 | 294321.71 | 6125133.39 |
| 33820 | 294307.79 | 6125097.60 |

|       |           |            |
|-------|-----------|------------|
| 33820 | 294284.69 | 6125033.75 |
| 33820 | 294274.65 | 6125007.35 |
| 33820 | 294257.18 | 6124959.38 |
| 33821 | 294388.62 | 6125107.86 |
| 33821 | 294376.26 | 6125074.83 |
| 33821 | 294369.18 | 6125055.74 |
| 33821 | 294343.12 | 6124983.27 |
| 33822 | 295396.20 | 6126458.23 |
| 33823 | 294838.33 | 6128228.99 |
| 33823 | 294758.83 | 6128235.79 |
| 33824 | 295729.67 | 6127244.10 |
| 33824 | 295830.10 | 6127235.96 |
| 33825 | 296304.92 | 6125282.96 |
| 33825 | 296312.99 | 6125254.95 |
| 33825 | 296321.47 | 6125226.85 |
| 33825 | 296328.12 | 6125206.40 |
| 33825 | 296332.74 | 6125193.43 |
| 33826 | 298552.84 | 6127185.62 |
| 33826 | 298535.62 | 6127171.69 |
| 33826 | 298524.22 | 6127172.04 |
| 33827 | 294101.98 | 6124887.20 |
| 33827 | 294067.37 | 6124795.14 |
| 33830 | 295557.45 | 6126097.25 |
| 33830 | 295574.44 | 6126099.37 |
| 33830 | 295622.04 | 6126105.37 |
| 33830 | 295647.98 | 6126108.64 |
| 33830 | 295678.32 | 6126112.60 |
| 33830 | 295681.48 | 6126113.02 |
| 33831 | 295312.60 | 6126109.13 |
| 33831 | 295317.23 | 6126067.13 |
| 33832 | 295196.16 | 6127239.62 |
| 33834 | 296143.23 | 6126165.87 |
| 33834 | 296220.85 | 6126175.57 |
| 33836 | 293158.94 | 6130959.68 |
| 33837 | 296129.33 | 6126289.47 |
| 33837 | 296158.36 | 6126292.34 |
| 33837 | 296181.86 | 6126294.66 |
| 33837 | 296207.59 | 6126297.34 |
| 33837 | 296221.01 | 6126298.71 |
| 33837 | 296263.70 | 6126303.18 |
| 33837 | 296311.93 | 6126307.90 |
| 33838 | 298051.01 | 6127623.13 |
| 33838 | 298078.28 | 6127618.06 |
| 33838 | 298097.26 | 6127607.75 |
| 33839 | 294270.26 | 6125111.46 |
| 33839 | 294247.17 | 6125047.60 |
| 33839 | 294237.13 | 6125021.20 |
| 33839 | 294219.66 | 6124973.24 |
| 33840 | 297704.60 | 6127345.64 |
| 33840 | 297709.01 | 6127344.83 |

|       |           |            |
|-------|-----------|------------|
| 33840 | 297716.76 | 6127343.39 |
| 33840 | 297723.03 | 6127342.26 |
| 33840 | 297921.56 | 6127306.34 |
| 33843 | 294939.26 | 6128306.48 |
| 33843 | 294930.15 | 6128306.88 |
| 33843 | 294898.81 | 6128308.80 |
| 33843 | 294862.45 | 6128311.91 |
| 33843 | 294826.58 | 6128314.98 |
| 33843 | 294790.71 | 6128318.05 |
| 33844 | 294750.85 | 6127289.86 |
| 33845 | 294770.90 | 6127293.53 |
| 33845 | 294772.83 | 6127382.38 |
| 33845 | 294773.34 | 6127405.79 |
| 33845 | 294773.32 | 6127451.20 |
| 33846 | 296049.14 | 6128499.05 |
| 33846 | 296047.85 | 6128488.58 |
| 33846 | 296041.55 | 6128440.38 |
| 33846 | 296037.90 | 6128409.24 |
| 33846 | 296036.49 | 6128400.33 |
| 33846 | 296035.75 | 6128395.72 |
| 33846 | 296034.22 | 6128383.25 |
| 33846 | 296028.53 | 6128336.69 |
| 33846 | 296021.76 | 6128287.66 |
| 33847 | 296011.71 | 6128509.45 |
| 33847 | 296010.67 | 6128502.46 |
| 33847 | 296009.55 | 6128495.47 |
| 33847 | 296005.08 | 6128457.47 |
| 33847 | 296001.00 | 6128424.79 |
| 33847 | 295998.39 | 6128406.86 |
| 33847 | 295997.65 | 6128401.78 |
| 33847 | 295994.87 | 6128380.98 |
| 33847 | 295992.09 | 6128358.51 |
| 33848 | 294209.50 | 6125175.22 |
| 33848 | 294204.12 | 6125160.50 |
| 33848 | 294171.57 | 6125074.16 |
| 33848 | 294152.62 | 6125020.24 |
| 33849 | 293513.37 | 6127346.78 |
| 33849 | 293515.56 | 6127356.88 |
| 33849 | 293517.65 | 6127366.47 |
| 33849 | 293523.96 | 6127395.56 |
| 33849 | 293534.45 | 6127437.99 |
| 33849 | 293542.25 | 6127461.71 |
| 33849 | 293544.20 | 6127468.65 |
| 33849 | 293546.69 | 6127473.52 |
| 33849 | 293550.48 | 6127479.16 |
| 33849 | 293556.77 | 6127487.39 |
| 33849 | 293562.94 | 6127495.30 |
| 33849 | 293599.24 | 6127529.22 |
| 33851 | 297587.80 | 6127406.55 |
| 33851 | 297628.20 | 6127480.50 |



|       |           |            |
|-------|-----------|------------|
| 33851 | 297659.28 | 6127536.34 |
| 33851 | 297668.43 | 6127549.29 |
| 33851 | 297702.33 | 6127593.40 |
| 33851 | 297754.74 | 6127558.06 |
| 33851 | 297755.09 | 6127557.84 |
| 33851 | 297755.56 | 6127557.56 |
| 33852 | 298097.34 | 6127942.80 |
| 33852 | 298180.64 | 6127950.32 |
| 33852 | 298271.26 | 6127958.99 |
| 33853 | 297945.94 | 6126264.60 |
| 33853 | 297937.02 | 6126257.26 |
| 33854 | 295958.22 | 6127559.94 |
| 33854 | 295963.47 | 6127617.00 |
| 33856 | 296078.72 | 6127223.19 |
| 33856 | 296166.95 | 6127221.27 |
| 33856 | 296168.29 | 6127221.25 |
| 33857 | 295065.78 | 6126403.36 |
| 33857 | 295135.22 | 6126413.18 |
| 33857 | 295135.56 | 6126413.23 |
| 33857 | 295143.07 | 6126414.27 |
| 33859 | 294392.21 | 6127582.65 |
| 33859 | 294415.93 | 6127581.81 |
| 33859 | 294470.50 | 6127579.88 |
| 33859 | 294554.44 | 6127576.91 |
| 33859 | 294596.45 | 6127575.14 |
| 33859 | 294620.74 | 6127574.13 |
| 33860 | 294167.90 | 6125773.59 |
| 33860 | 294188.09 | 6125764.58 |
| 33860 | 294262.87 | 6125744.22 |
| 33860 | 294268.37 | 6125742.92 |
| 33860 | 294276.38 | 6125741.04 |
| 33860 | 294337.85 | 6125726.96 |
| 33861 | 297870.71 | 6126572.80 |
| 33861 | 297893.55 | 6126568.72 |
| 33861 | 297910.31 | 6126565.17 |
| 33861 | 297954.41 | 6126556.26 |
| 33861 | 298008.02 | 6126545.80 |
| 33861 | 298031.09 | 6126533.47 |
| 33862 | 295406.56 | 6126449.74 |
| 33862 | 295506.68 | 6126462.55 |
| 33863 | 294321.35 | 6125611.12 |
| 33863 | 294382.32 | 6125588.76 |
| 33863 | 294444.67 | 6125566.18 |
| 33864 | 297866.93 | 6126998.72 |
| 33864 | 297853.54 | 6126934.04 |
| 33866 | 295184.31 | 6127230.75 |
| 33867 | 294102.18 | 6127330.11 |
| 33867 | 294052.96 | 6127328.49 |
| 33867 | 294003.75 | 6127326.07 |
| 33867 | 293959.73 | 6127324.16 |

|       |           |            |
|-------|-----------|------------|
| 33867 | 293929.86 | 6127321.96 |
| 33868 | 297768.38 | 6127393.24 |
| 33868 | 297831.16 | 6127511.59 |
| 33868 | 297868.82 | 6127583.34 |
| 33869 | 298100.28 | 6127670.71 |
| 33869 | 298113.08 | 6127665.93 |
| 33870 | 294988.49 | 6128177.92 |
| 33871 | 294316.72 | 6125499.91 |
| 33871 | 294372.20 | 6125480.08 |
| 33871 | 294419.36 | 6125462.73 |
| 33871 | 294481.71 | 6125440.18 |
| 33872 | 295401.66 | 6126327.99 |
| 33872 | 295388.53 | 6126326.50 |
| 33872 | 295295.13 | 6126314.27 |
| 33872 | 295286.22 | 6126313.10 |
| 33872 | 295202.01 | 6126302.48 |
| 33872 | 295160.93 | 6126297.67 |
| 33873 | 295228.56 | 6125791.46 |
| 33873 | 295348.19 | 6125807.11 |
| 33874 | 296131.87 | 6126067.47 |
| 33874 | 296133.02 | 6126057.54 |
| 33875 | 298255.32 | 6127370.06 |
| 33875 | 298250.28 | 6127372.01 |
| 33875 | 298217.07 | 6127384.85 |
| 33875 | 298166.71 | 6127404.50 |
| 33875 | 298086.62 | 6127435.59 |
| 33875 | 298026.71 | 6127458.61 |
| 33875 | 298026.85 | 6127458.85 |
| 33875 | 298033.84 | 6127470.29 |
| 33876 | 294307.80 | 6125539.99 |
| 33876 | 294332.73 | 6125530.67 |
| 33876 | 294419.94 | 6125499.24 |
| 33876 | 294475.08 | 6125479.10 |
| 33877 | 295552.61 | 6126134.49 |
| 33877 | 295556.45 | 6126104.09 |
| 33877 | 295557.45 | 6126097.25 |
| 33877 | 295564.42 | 6126049.28 |
| 33877 | 295568.03 | 6126017.98 |
| 33879 | 294334.16 | 6125399.63 |
| 33880 | 294262.20 | 6125730.39 |
| 33880 | 294267.64 | 6125741.32 |
| 33880 | 294268.37 | 6125742.92 |
| 33881 | 294409.42 | 6125372.58 |
| 33882 | 294368.89 | 6125145.18 |
| 33882 | 294447.06 | 6125359.05 |
| 33883 | 295023.58 | 6128046.04 |
| 33883 | 295025.93 | 6128065.86 |
| 33883 | 295028.63 | 6128087.97 |
| 33883 | 295034.72 | 6128145.82 |
| 33883 | 295036.39 | 6128165.31 |

|       |           |            |
|-------|-----------|------------|
| 33883 | 295037.08 | 6128173.45 |
| 33883 | 295038.08 | 6128185.20 |
| 33883 | 295040.89 | 6128212.15 |
| 33883 | 295042.85 | 6128238.03 |
| 33883 | 295049.03 | 6128291.77 |
| 33884 | 294947.46 | 6127253.61 |
| 33884 | 294946.38 | 6127249.13 |
| 33884 | 294939.62 | 6127221.22 |
| 33884 | 294924.99 | 6127154.94 |
| 33884 | 294915.05 | 6127090.57 |
| 33884 | 294910.85 | 6127048.62 |
| 33886 | 295828.66 | 6126512.63 |
| 33886 | 295880.03 | 6126519.27 |
| 33886 | 295930.49 | 6126525.78 |
| 33886 | 295996.04 | 6126534.80 |
| 33887 | 295817.57 | 6126001.55 |
| 33887 | 295823.89 | 6126002.40 |
| 33887 | 295852.06 | 6126006.18 |
| 33887 | 295888.88 | 6126010.30 |
| 33887 | 295931.33 | 6126015.92 |
| 33887 | 295946.66 | 6126018.35 |
| 33887 | 295948.10 | 6126018.55 |
| 33888 | 295545.83 | 6126221.29 |
| 33888 | 295676.26 | 6126238.11 |
| 33888 | 295785.30 | 6126252.39 |
| 33889 | 295131.62 | 6126422.71 |
| 33889 | 295141.95 | 6126424.08 |
| 33890 | 295933.26 | 6126130.59 |
| 33890 | 295947.47 | 6126022.94 |
| 33890 | 295948.10 | 6126018.55 |
| 33890 | 295964.81 | 6125900.35 |
| 33891 | 297655.45 | 6127634.52 |
| 33891 | 297667.42 | 6127643.84 |
| 33891 | 297748.93 | 6127706.89 |
| 33891 | 297757.80 | 6127712.08 |
| 33891 | 297768.00 | 6127715.93 |
| 33891 | 297780.69 | 6127719.50 |
| 33891 | 297796.00 | 6127720.38 |
| 33891 | 297807.81 | 6127719.34 |
| 33892 | 294775.02 | 6127621.01 |
| 33892 | 294775.22 | 6127629.39 |
| 33892 | 294775.23 | 6127629.96 |
| 33892 | 294775.50 | 6127641.33 |
| 33892 | 294777.62 | 6127730.72 |
| 33892 | 294778.92 | 6127789.79 |
| 33893 | 295474.08 | 6125790.65 |
| 33893 | 295484.91 | 6125699.46 |
| 33893 | 295488.08 | 6125674.84 |
| 33895 | 294496.94 | 6127891.49 |
| 33895 | 294474.30 | 6128009.01 |

|       |           |            |
|-------|-----------|------------|
| 33895 | 294456.51 | 6128094.73 |
| 33896 | 296279.85 | 6128426.06 |
| 33896 | 296274.69 | 6128383.34 |
| 33896 | 296272.86 | 6128367.61 |
| 33896 | 296270.76 | 6128349.55 |
| 33896 | 296261.98 | 6128281.98 |
| 33896 | 296255.78 | 6128231.58 |
| 33897 | 294963.61 | 6125979.53 |
| 33897 | 294992.02 | 6125972.91 |
| 33897 | 295056.29 | 6125953.05 |
| 33897 | 295101.39 | 6125939.97 |
| 33897 | 295180.58 | 6125922.35 |
| 33897 | 295192.24 | 6125920.07 |
| 33898 | 296636.55 | 6125591.59 |
| 33899 | 294532.59 | 6127643.71 |
| 33899 | 294498.40 | 6127644.52 |
| 33899 | 294448.52 | 6127646.65 |
| 33900 | 296004.76 | 6127836.02 |
| 33901 | 295727.11 | 6125859.76 |
| 33901 | 295595.97 | 6125842.85 |
| 33901 | 295590.71 | 6125842.21 |
| 33902 | 296991.81 | 6127495.33 |
| 33902 | 296948.52 | 6127503.24 |
| 33902 | 296859.15 | 6127519.64 |
| 33902 | 296812.53 | 6127528.62 |
| 33902 | 296807.51 | 6127529.59 |
| 33902 | 296802.47 | 6127530.47 |
| 33902 | 296797.41 | 6127531.27 |
| 33902 | 296792.34 | 6127531.98 |
| 33902 | 296787.26 | 6127532.59 |
| 33902 | 296782.17 | 6127533.12 |
| 33902 | 296777.07 | 6127533.56 |
| 33902 | 296771.96 | 6127533.92 |
| 33902 | 296766.85 | 6127534.18 |
| 33902 | 296764.38 | 6127534.27 |
| 33902 | 296742.15 | 6127533.39 |
| 33902 | 296730.34 | 6127532.21 |
| 33903 | 296113.96 | 6125120.07 |
| 33904 | 296592.37 | 6127416.78 |
| 33904 | 296598.48 | 6127417.35 |
| 33904 | 296606.37 | 6127417.37 |
| 33904 | 296639.57 | 6127417.47 |
| 33904 | 296680.40 | 6127412.98 |
| 33904 | 296754.08 | 6127402.92 |
| 33904 | 296801.60 | 6127396.73 |
| 33904 | 296856.27 | 6127389.83 |
| 33905 | 295813.87 | 6128196.02 |
| 33905 | 295818.88 | 6128195.37 |
| 33905 | 295897.78 | 6128185.15 |
| 33906 | 298244.72 | 6127480.36 |

|       |           |            |
|-------|-----------|------------|
| 33907 | 296525.26 | 6128798.11 |
| 33907 | 296543.09 | 6128800.80 |
| 33907 | 296802.03 | 6128744.89 |
| 33908 | 295127.71 | 6126550.72 |
| 33908 | 295129.77 | 6126530.26 |
| 33908 | 295130.71 | 6126522.19 |
| 33908 | 295137.87 | 6126459.51 |
| 33908 | 295141.95 | 6126424.08 |
| 33908 | 295143.07 | 6126414.27 |
| 33908 | 295143.89 | 6126407.13 |
| 33909 | 294176.35 | 6124968.73 |
| 33909 | 294164.97 | 6124941.97 |
| 33909 | 294157.57 | 6124921.44 |
| 33909 | 294145.42 | 6124890.07 |
| 33909 | 294134.02 | 6124857.51 |
| 33909 | 294124.34 | 6124832.45 |
| 33909 | 294105.56 | 6124782.05 |
| 33909 | 294095.08 | 6124754.14 |
| 33910 | 296241.72 | 6128458.83 |
| 33910 | 296238.23 | 6128428.54 |
| 33910 | 296232.51 | 6128382.65 |
| 33910 | 296231.26 | 6128372.74 |
| 33910 | 296229.21 | 6128356.40 |
| 33910 | 296223.03 | 6128310.95 |
| 33910 | 296215.99 | 6128255.36 |
| 33911 | 296089.74 | 6126816.78 |
| 33911 | 296095.68 | 6126818.24 |
| 33911 | 296101.27 | 6126820.71 |
| 33911 | 296106.35 | 6126824.12 |
| 33911 | 296109.13 | 6126826.61 |
| 33911 | 296114.86 | 6126832.76 |
| 33911 | 296119.44 | 6126839.80 |
| 33911 | 296121.18 | 6126843.43 |
| 33911 | 296122.60 | 6126847.64 |
| 33911 | 296123.94 | 6126851.88 |
| 33911 | 296125.21 | 6126856.13 |
| 33911 | 296126.41 | 6126860.41 |
| 33911 | 296127.53 | 6126864.71 |
| 33911 | 296128.58 | 6126869.03 |
| 33911 | 296128.92 | 6126870.51 |
| 33911 | 296139.94 | 6126921.55 |
| 33911 | 296153.67 | 6126984.79 |
| 33911 | 296157.28 | 6127003.99 |
| 33911 | 296166.89 | 6127047.65 |
| 33913 | 294241.54 | 6124917.20 |
| 33913 | 294223.32 | 6124869.61 |
| 33913 | 294213.66 | 6124843.95 |
| 33913 | 294192.43 | 6124786.89 |
| 33913 | 294179.72 | 6124750.96 |
| 33914 | 294991.14 | 6126931.48 |

|       |           |            |
|-------|-----------|------------|
| 33914 | 295003.78 | 6126833.01 |
| 33914 | 295003.27 | 6126827.00 |
| 33914 | 295004.07 | 6126821.95 |
| 33915 | 295860.74 | 6126656.43 |
| 33915 | 295863.61 | 6126637.38 |
| 33915 | 295867.71 | 6126610.07 |
| 33915 | 295872.05 | 6126576.41 |
| 33915 | 295878.20 | 6126532.09 |
| 33915 | 295879.28 | 6126524.53 |
| 33915 | 295880.03 | 6126519.27 |
| 33915 | 295881.06 | 6126512.10 |
| 33915 | 295885.78 | 6126479.06 |
| 33915 | 295896.14 | 6126402.87 |
| 33915 | 295897.54 | 6126392.63 |
| 33916 | 294487.95 | 6126014.85 |
| 33916 | 294520.96 | 6126013.38 |
| 33916 | 294563.71 | 6126011.47 |
| 33916 | 294570.46 | 6126011.16 |
| 33916 | 294723.54 | 6126004.32 |
| 33916 | 294736.20 | 6126003.96 |
| 33916 | 294751.47 | 6126003.49 |
| 33917 | 294203.33 | 6125449.44 |
| 33917 | 294205.87 | 6125448.46 |
| 33917 | 294259.29 | 6125428.03 |
| 33917 | 294296.72 | 6125413.72 |
| 33917 | 294323.90 | 6125403.32 |
| 33917 | 294334.16 | 6125399.63 |
| 33917 | 294371.79 | 6125386.11 |
| 33917 | 294409.42 | 6125372.58 |
| 33917 | 294447.06 | 6125359.05 |
| 33917 | 294474.17 | 6125349.31 |
| 33919 | 296082.18 | 6128410.50 |
| 33919 | 296079.82 | 6128393.94 |
| 33919 | 296077.65 | 6128377.61 |
| 33919 | 296071.96 | 6128331.33 |
| 33919 | 296065.19 | 6128279.42 |
| 33919 | 296059.34 | 6128232.12 |
| 33919 | 296054.98 | 6128199.51 |
| 33919 | 296054.57 | 6128196.46 |
| 33919 | 296052.49 | 6128179.30 |
| 33919 | 296050.30 | 6128163.75 |
| 33919 | 296046.76 | 6128135.89 |
| 33919 | 296043.75 | 6128111.41 |
| 33920 | 294875.42 | 6127733.62 |
| 33920 | 294913.80 | 6127730.71 |
| 33920 | 294941.07 | 6127728.26 |
| 33920 | 294968.78 | 6127725.74 |
| 33920 | 295007.32 | 6127722.73 |
| 33920 | 295037.35 | 6127719.81 |
| 33920 | 295103.31 | 6127714.37 |

|       |           |            |
|-------|-----------|------------|
| 33920 | 295150.64 | 6127710.65 |
| 33921 | 298096.72 | 6126497.08 |
| 33921 | 298162.45 | 6126460.09 |
| 33921 | 298236.53 | 6126419.50 |
| 33921 | 298256.62 | 6126407.11 |
| 33921 | 298276.72 | 6126365.21 |
| 33922 | 296168.19 | 6128483.34 |
| 33922 | 296167.71 | 6128479.75 |
| 33922 | 296165.99 | 6128466.57 |
| 33922 | 296164.05 | 6128449.10 |
| 33922 | 296162.41 | 6128437.11 |
| 33922 | 296159.94 | 6128418.69 |
| 33922 | 296157.33 | 6128399.15 |
| 33922 | 296154.97 | 6128382.58 |
| 33922 | 296152.80 | 6128366.26 |
| 33922 | 296147.11 | 6128319.98 |
| 33922 | 296141.55 | 6128273.92 |
| 33922 | 296135.19 | 6128222.66 |
| 33922 | 296130.71 | 6128188.98 |
| 33923 | 296194.92 | 6125534.00 |
| 33924 | 296551.01 | 6127552.23 |
| 33924 | 296549.15 | 6127552.70 |
| 33924 | 296552.94 | 6127676.16 |
| 33924 | 296551.77 | 6127676.25 |
| 33924 | 296478.30 | 6127682.17 |
| 33924 | 296478.74 | 6127732.35 |
| 33924 | 296479.06 | 6127768.67 |
| 33924 | 296462.71 | 6127771.97 |
| 33924 | 296455.24 | 6127773.45 |
| 33924 | 296448.28 | 6127774.83 |
| 33924 | 296444.34 | 6127775.53 |
| 33924 | 296440.53 | 6127776.20 |
| 33925 | 297414.66 | 6127398.12 |
| 33925 | 297278.49 | 6127323.59 |
| 33925 | 297269.76 | 6127320.65 |
| 33925 | 297256.34 | 6127318.22 |
| 33925 | 297242.70 | 6127318.15 |
| 33925 | 297229.25 | 6127320.45 |
| 33925 | 297126.61 | 6127347.42 |
| 33926 | 295799.91 | 6128082.96 |
| 33926 | 295804.94 | 6128082.29 |
| 33927 | 295566.50 | 6126348.57 |
| 33927 | 295612.88 | 6126354.61 |
| 33927 | 295657.30 | 6126360.74 |
| 33927 | 295726.86 | 6126370.34 |
| 33927 | 295772.48 | 6126375.56 |
| 33927 | 295774.58 | 6126375.80 |
| 33927 | 295822.14 | 6126382.84 |
| 33928 | 293370.73 | 6126801.93 |
| 33928 | 293188.78 | 6126803.06 |

|       |           |            |
|-------|-----------|------------|
| 33929 | 294245.99 | 6126899.60 |
| 33929 | 294193.68 | 6126905.66 |
| 33929 | 294166.02 | 6126909.05 |
| 33929 | 294117.87 | 6126914.46 |
| 33929 | 294112.79 | 6126914.94 |
| 33929 | 294106.03 | 6126915.58 |
| 33929 | 294091.15 | 6126917.65 |
| 33929 | 294027.27 | 6126924.50 |
| 33929 | 293987.54 | 6126929.14 |
| 33930 | 295981.10 | 6128587.89 |
| 33930 | 295981.11 | 6128581.10 |
| 33930 | 296014.61 | 6128581.12 |
| 33930 | 295987.42 | 6128552.50 |
| 33930 | 295966.52 | 6128528.74 |
| 33930 | 295915.22 | 6128472.15 |
| 33930 | 295874.33 | 6128427.86 |
| 33930 | 295836.82 | 6128387.68 |
| 33930 | 295812.26 | 6128360.00 |
| 33930 | 295776.99 | 6128321.15 |
| 33930 | 295767.17 | 6128309.99 |
| 33930 | 295773.81 | 6128304.83 |
| 33931 | 294255.19 | 6126934.41 |
| 33931 | 294202.87 | 6126940.46 |
| 33931 | 294175.21 | 6126943.85 |
| 33931 | 294127.06 | 6126949.27 |
| 33931 | 294113.24 | 6126950.66 |
| 33931 | 294100.34 | 6126952.45 |
| 33931 | 294036.46 | 6126959.64 |
| 33931 | 293944.98 | 6126970.31 |
| 33932 | 294817.95 | 6126678.40 |
| 33932 | 294770.90 | 6126672.96 |
| 33932 | 294767.43 | 6126672.51 |
| 33932 | 294715.84 | 6126665.76 |
| 33932 | 294694.09 | 6126573.00 |
| 33932 | 294594.58 | 6126591.92 |
| 33932 | 294576.29 | 6126599.11 |
| 33932 | 294544.97 | 6126605.44 |
| 33932 | 294503.43 | 6126614.83 |
| 33932 | 294479.78 | 6126620.23 |
| 33933 | 297076.31 | 6127482.08 |
| 33933 | 297160.94 | 6127468.87 |
| 33933 | 297445.15 | 6127424.50 |
| 33935 | 296203.56 | 6128458.90 |
| 33935 | 296201.62 | 6128443.42 |
| 33935 | 296199.98 | 6128431.43 |
| 33935 | 296197.52 | 6128413.01 |
| 33935 | 296195.12 | 6128391.47 |
| 33935 | 296193.44 | 6128377.65 |
| 33935 | 296193.06 | 6128374.55 |
| 33935 | 296190.04 | 6128351.34 |



|       |           |            |
|-------|-----------|------------|
| 33935 | 296185.07 | 6128315.31 |
| 33935 | 296178.77 | 6128263.53 |
| 33935 | 296172.64 | 6128215.92 |
| 33935 | 296168.58 | 6128184.15 |
| 33935 | 296167.96 | 6128179.29 |
| 33935 | 296165.62 | 6128160.89 |
| 33935 | 296163.02 | 6128146.72 |
| 33935 | 296159.48 | 6128118.86 |
| 33936 | 294258.28 | 6127015.67 |
| 33936 | 294170.16 | 6127025.82 |
| 33936 | 294122.41 | 6127031.64 |
| 33936 | 294122.28 | 6127031.66 |
| 33936 | 294088.29 | 6127035.66 |
| 33936 | 294060.15 | 6127038.96 |
| 33936 | 293989.43 | 6127046.89 |
| 33937 | 298084.16 | 6127566.46 |
| 33937 | 298084.41 | 6127566.25 |
| 33937 | 298084.65 | 6127565.98 |
| 33937 | 298084.86 | 6127565.61 |
| 33937 | 298085.03 | 6127565.09 |
| 33937 | 298085.06 | 6127564.67 |
| 33937 | 298085.03 | 6127564.38 |
| 33937 | 298084.96 | 6127564.10 |
| 33937 | 298084.85 | 6127563.82 |
| 33937 | 298084.67 | 6127563.51 |
| 33937 | 298084.43 | 6127563.23 |
| 33937 | 298084.17 | 6127563.02 |
| 33937 | 298083.84 | 6127562.83 |
| 33937 | 298083.41 | 6127562.68 |
| 33937 | 298083.08 | 6127562.64 |
| 33937 | 298082.79 | 6127562.64 |
| 33937 | 298082.50 | 6127562.68 |
| 33937 | 298082.18 | 6127562.78 |
| 33937 | 298081.92 | 6127562.91 |
| 33937 | 298045.82 | 6127504.65 |
| 33937 | 297989.11 | 6127412.74 |
| 33937 | 297988.85 | 6127412.33 |
| 33937 | 297942.12 | 6127336.59 |
| 33938 | 294264.65 | 6127047.55 |
| 33938 | 294175.85 | 6127056.97 |
| 33938 | 294126.01 | 6127062.86 |
| 33938 | 294094.00 | 6127066.63 |
| 33938 | 294065.86 | 6127069.94 |
| 33938 | 293995.15 | 6127077.86 |
| 33939 | 294793.04 | 6127073.65 |
| 33939 | 294800.03 | 6127004.01 |
| 33939 | 294807.28 | 6126931.11 |
| 33939 | 294822.49 | 6126776.79 |
| 33939 | 294828.77 | 6126712.56 |
| 33940 | 296291.73 | 6127213.03 |

|       |           |            |
|-------|-----------|------------|
| 33940 | 296400.20 | 6127302.79 |
| 33941 | 296505.97 | 6128802.89 |
| 33941 | 296494.08 | 6128758.95 |
| 33941 | 296492.91 | 6128753.50 |
| 33941 | 296480.64 | 6128696.63 |
| 33941 | 296470.21 | 6128643.34 |
| 33941 | 296448.41 | 6128525.75 |
| 33941 | 296439.72 | 6128473.73 |
| 33941 | 296434.83 | 6128434.82 |
| 33942 | 296130.62 | 6128489.02 |
| 33942 | 296130.13 | 6128485.43 |
| 33942 | 296128.41 | 6128472.25 |
| 33942 | 296126.47 | 6128454.78 |
| 33942 | 296124.83 | 6128442.79 |
| 33942 | 296122.37 | 6128424.37 |
| 33942 | 296119.76 | 6128404.83 |
| 33942 | 296118.13 | 6128388.80 |
| 33942 | 296115.79 | 6128371.96 |
| 33942 | 296110.19 | 6128326.93 |
| 33942 | 296103.39 | 6128273.28 |
| 33942 | 296097.65 | 6128227.42 |
| 33942 | 296093.22 | 6128194.73 |
| 33942 | 296092.25 | 6128187.55 |
| 33942 | 296089.90 | 6128170.41 |
| 33942 | 296088.64 | 6128160.02 |
| 33942 | 296084.50 | 6128128.99 |
| 33942 | 296081.32 | 6128105.73 |
| 33943 | 295607.61 | 6125824.44 |
| 33943 | 295614.39 | 6125767.66 |
| 33943 | 295624.65 | 6125694.32 |
| 33943 | 295626.43 | 6125681.09 |
| 33943 | 295631.14 | 6125646.01 |
| 33943 | 295646.30 | 6125536.53 |
| 33943 | 295648.57 | 6125520.18 |
| 33944 | 298389.05 | 6127054.84 |
| 33944 | 298279.18 | 6126959.11 |
| 33944 | 298086.67 | 6126798.81 |
| 33944 | 298059.13 | 6126775.86 |
| 33945 | 299202.58 | 6127736.99 |
| 33945 | 299235.81 | 6127768.94 |
| 33945 | 299288.20 | 6127831.56 |
| 33945 | 299327.82 | 6127887.78 |
| 33947 | 298382.45 | 6127230.35 |
| 33948 | 293748.33 | 6127337.56 |
| 33948 | 293761.96 | 6127337.57 |
| 33948 | 293774.03 | 6127337.79 |
| 33948 | 293789.90 | 6127338.25 |
| 33948 | 293914.70 | 6127331.06 |
| 33948 | 294126.26 | 6127340.38 |
| 33949 | 295528.50 | 6125188.68 |

|       |           |            |
|-------|-----------|------------|
| 33949 | 295543.09 | 6125188.11 |
| 33949 | 295656.93 | 6125184.07 |
| 33949 | 295672.70 | 6125183.68 |
| 33949 | 295752.97 | 6125179.93 |
| 33949 | 295793.60 | 6125178.35 |
| 33949 | 295830.47 | 6125177.02 |
| 33949 | 295843.62 | 6125176.55 |
| 33950 | 296210.33 | 6127113.48 |
| 33950 | 296236.65 | 6127136.13 |
| 33950 | 296239.09 | 6127137.89 |
| 33950 | 296241.49 | 6127139.62 |
| 33950 | 296267.48 | 6127160.78 |
| 33950 | 296350.87 | 6127233.81 |
| 33950 | 296418.39 | 6127292.88 |
| 33950 | 296481.55 | 6127346.43 |
| 33950 | 296500.25 | 6127363.95 |
| 33951 | 296126.82 | 6126786.22 |
| 33951 | 296134.23 | 6126817.38 |
| 33951 | 296168.26 | 6126973.22 |
| 33951 | 296181.00 | 6127033.84 |
| 33951 | 296183.52 | 6127045.36 |
| 33951 | 296186.25 | 6127056.83 |
| 33951 | 296189.17 | 6127068.25 |
| 33951 | 296189.69 | 6127070.21 |
| 33951 | 296195.46 | 6127086.01 |
| 33951 | 296203.88 | 6127100.58 |
| 33951 | 296208.97 | 6127107.21 |
| 33951 | 296233.09 | 6127130.72 |
| 33951 | 296240.34 | 6127136.52 |
| 33951 | 296239.09 | 6127137.89 |
| 33952 | 294171.69 | 6125188.03 |
| 33952 | 294164.31 | 6125167.52 |
| 33952 | 294153.32 | 6125141.06 |
| 33952 | 294139.20 | 6125102.01 |
| 33952 | 294131.73 | 6125082.48 |
| 33952 | 294108.57 | 6125018.90 |
| 33952 | 294105.60 | 6125011.83 |
| 33952 | 294100.39 | 6124995.47 |
| 33952 | 294073.26 | 6124925.94 |
| 33952 | 294062.43 | 6124896.27 |
| 33952 | 294058.34 | 6124884.37 |
| 33952 | 294031.57 | 6124814.10 |
| 33952 | 294018.19 | 6124777.29 |
| 33953 | 298841.58 | 6127430.41 |
| 33953 | 298824.96 | 6127423.76 |
| 33953 | 298570.71 | 6127227.14 |
| 33954 | 299326.16 | 6129347.75 |
| 33954 | 299320.25 | 6129351.13 |
| 33954 | 299063.84 | 6128907.85 |
| 33955 | 298540.52 | 6127197.97 |

|       |           |            |
|-------|-----------|------------|
| 33955 | 298534.51 | 6127203.99 |
| 33955 | 298548.56 | 6127215.96 |
| 33955 | 298549.79 | 6127217.01 |
| 33955 | 298499.86 | 6127225.94 |
| 33955 | 298392.31 | 6127245.97 |
| 33956 | 297159.02 | 6127466.77 |
| 33956 | 297161.14 | 6127466.40 |
| 33956 | 297165.77 | 6127465.50 |
| 33956 | 297172.80 | 6127470.02 |
| 33956 | 297203.34 | 6127487.94 |
| 33956 | 297307.20 | 6127654.10 |
| 33956 | 297308.19 | 6127655.68 |
| 33956 | 297312.08 | 6127654.73 |
| 33956 | 297340.32 | 6127693.53 |
| 33956 | 297377.77 | 6127720.24 |
| 33956 | 297375.03 | 6127725.58 |
| 33956 | 297429.11 | 6127763.41 |
| 33956 | 297457.40 | 6127798.40 |
| 33958 | 296331.25 | 6127947.73 |
| 33958 | 296325.76 | 6127948.23 |
| 33958 | 296306.47 | 6127950.36 |
| 33958 | 296291.95 | 6127952.25 |
| 33958 | 296258.72 | 6127955.11 |
| 33958 | 296219.08 | 6127959.77 |
| 33958 | 296194.74 | 6127962.25 |
| 33958 | 296161.35 | 6127966.30 |
| 33958 | 296124.68 | 6127970.02 |
| 33958 | 296038.54 | 6127979.03 |
| 33958 | 295996.00 | 6127982.86 |
| 33958 | 295992.38 | 6127981.28 |
| 33958 | 295980.02 | 6127975.85 |
| 33958 | 295936.96 | 6127964.61 |
| 33958 | 295907.62 | 6127966.15 |
| 33958 | 295876.54 | 6127968.37 |
| 33958 | 295826.68 | 6127972.16 |
| 33958 | 295766.23 | 6127977.35 |
| 33958 | 295689.75 | 6127985.45 |
| 33958 | 295658.50 | 6127988.56 |
| 33958 | 295502.82 | 6128007.53 |
| 33958 | 295552.80 | 6128062.25 |
| 33958 | 295596.18 | 6128110.62 |
| 33958 | 295629.22 | 6128147.67 |
| 33958 | 295686.82 | 6128211.07 |
| 33958 | 295718.96 | 6128246.79 |
| 33958 | 295736.04 | 6128264.42 |
| 33959 | 294923.44 | 6125774.01 |
| 33959 | 294930.35 | 6125765.10 |
| 33959 | 295001.15 | 6125772.65 |
| 33959 | 295012.72 | 6125599.33 |
| 33959 | 295022.31 | 6125425.28 |

|       |           |            |
|-------|-----------|------------|
| 33960 | 297936.98 | 6127328.27 |
| 33960 | 297933.09 | 6127328.98 |
| 33960 | 297931.58 | 6127329.25 |
| 33960 | 297925.64 | 6127330.29 |
| 33960 | 297752.39 | 6127362.30 |
| 33960 | 297732.62 | 6127365.88 |
| 33961 | 295033.45 | 6125252.86 |
| 33961 | 295038.88 | 6125185.05 |
| 33961 | 295045.48 | 6125097.56 |
| 33961 | 295049.00 | 6125026.25 |
| 33961 | 295052.73 | 6124979.32 |
| 33961 | 295052.54 | 6124897.09 |
| 33961 | 295052.54 | 6124896.47 |
| 33961 | 295050.80 | 6124839.73 |
| 33961 | 295049.73 | 6124794.12 |
| 33961 | 295048.22 | 6124733.50 |
| 33961 | 295047.15 | 6124681.87 |
| 33961 | 295046.94 | 6124655.89 |
| 33961 | 295046.07 | 6124636.25 |
| 33962 | 294764.56 | 6126000.96 |
| 33962 | 294764.22 | 6125984.55 |
| 33962 | 294739.82 | 6125985.21 |
| 33962 | 294748.72 | 6125893.88 |
| 33962 | 294750.41 | 6125878.17 |
| 33962 | 294752.35 | 6125860.22 |
| 33962 | 294755.98 | 6125819.29 |
| 33962 | 294757.00 | 6125811.09 |
| 33962 | 294759.60 | 6125790.09 |
| 33962 | 294762.69 | 6125765.24 |
| 33962 | 294762.93 | 6125763.31 |
| 33962 | 294767.21 | 6125719.10 |
| 33962 | 294769.29 | 6125697.75 |
| 33962 | 294771.89 | 6125673.33 |
| 33962 | 294772.91 | 6125663.74 |
| 33962 | 294776.56 | 6125622.57 |
| 33962 | 294777.35 | 6125617.08 |
| 33962 | 294780.19 | 6125597.28 |
| 33962 | 294785.63 | 6125546.12 |
| 33962 | 294791.89 | 6125492.91 |
| 33962 | 294793.80 | 6125476.73 |
| 33962 | 294802.06 | 6125406.66 |
| 33962 | 294803.14 | 6125397.48 |
| 33962 | 294805.07 | 6125355.33 |
| 33962 | 294804.73 | 6125347.97 |
| 33962 | 294786.06 | 6125300.27 |
| 33962 | 294774.05 | 6125269.26 |
| 33963 | 299414.85 | 6127760.22 |
| 33963 | 299414.52 | 6127773.72 |
| 33963 | 299655.14 | 6127987.58 |
| 33963 | 299937.11 | 6128233.22 |

|       |           |            |
|-------|-----------|------------|
| 35479 | 296883.89 | 6127386.02 |
| 35479 | 296887.05 | 6127385.55 |
| 35480 | 296897.45 | 6127384.10 |
| 35488 | 298551.42 | 6127202.80 |
| 35488 | 298558.00 | 6127209.41 |
| 35489 | 298561.73 | 6127212.73 |
| 35489 | 298564.55 | 6127215.23 |
| 35491 | 298556.16 | 6127197.76 |
| 35491 | 298561.49 | 6127202.35 |
| 35492 | 298567.17 | 6127207.37 |
| 35492 | 298569.92 | 6127209.80 |
| 35492 | 298574.65 | 6127214.03 |
| 35497 | 295061.01 | 6125291.96 |
| 35497 | 295075.86 | 6125294.07 |
| 35497 | 295091.10 | 6125292.27 |
| 35498 | 295113.61 | 6125282.39 |
| 35589 | 296930.95 | 6128163.17 |
| 35618 | 297897.11 | 6125861.20 |
| 35630 | 296303.29 | 6125694.04 |
| 35633 | 296354.03 | 6125701.97 |
| 35633 | 296364.03 | 6125701.50 |
| 35635 | 296300.32 | 6125771.59 |
| 35635 | 296300.99 | 6125798.96 |
| 35635 | 296299.94 | 6125823.92 |
| 35636 | 296300.01 | 6125832.73 |
| 35636 | 296316.14 | 6125831.96 |
| 35656 | 298041.23 | 6127945.25 |
| 35663 | 297990.86 | 6128071.56 |
| 35663 | 297981.20 | 6128059.65 |
| 35667 | 298062.48 | 6128017.66 |
| 35667 | 298064.33 | 6128023.20 |
| 35667 | 298078.84 | 6128044.35 |
| 35669 | 297972.57 | 6128049.29 |
| 35669 | 297966.18 | 6128043.73 |
| 35669 | 297961.03 | 6128035.69 |
| 35669 | 297954.23 | 6128028.28 |
| 35669 | 297946.41 | 6128022.51 |
| 35669 | 297941.87 | 6128018.39 |
| 35669 | 297939.61 | 6128014.89 |
| 35669 | 297937.55 | 6128010.77 |
| 35669 | 297937.14 | 6128002.73 |
| 35669 | 297936.31 | 6127998.20 |
| 35670 | 297961.03 | 6127974.71 |
| 35670 | 298001.41 | 6127979.87 |
| 35670 | 298005.74 | 6127979.25 |
| 35670 | 298010.06 | 6127981.10 |
| 35670 | 298014.60 | 6127980.69 |
| 35670 | 298016.86 | 6127983.57 |
| 35670 | 298020.78 | 6127983.57 |
| 35670 | 298029.22 | 6127987.08 |

|       |           |            |
|-------|-----------|------------|
| 35670 | 298032.31 | 6127989.34 |
| 35670 | 298034.79 | 6127991.81 |
| 35670 | 298037.67 | 6127992.64 |
| 35670 | 298046.32 | 6128000.88 |
| 35675 | 297966.27 | 6127933.62 |
| 35675 | 297985.58 | 6127939.22 |
| 35675 | 298024.86 | 6127943.47 |
| 35675 | 298027.43 | 6127943.34 |
| 35677 | 297228.39 | 6128420.62 |
| 35677 | 297231.34 | 6128420.41 |
| 35685 | 297341.46 | 6128393.51 |
| 35689 | 297409.92 | 6128374.84 |
| 35699 | 297371.88 | 6128503.18 |
| 35705 | 297290.92 | 6128524.61 |
| 35735 | 298572.89 | 6128977.78 |
| 35738 | 298572.69 | 6128976.61 |
| 35740 | 298565.47 | 6128938.47 |
| 35740 | 298565.28 | 6128937.49 |
| 35741 | 298492.64 | 6128991.73 |
| 35742 | 298557.48 | 6128896.22 |
| 35752 | 298067.68 | 6128988.79 |
| 35759 | 294375.18 | 6125792.26 |
| 35759 | 294384.33 | 6125813.30 |
| 35759 | 294406.34 | 6125849.08 |
| 35759 | 294413.92 | 6125896.79 |
| 35765 | 294991.60 | 6125984.08 |
| 35768 | 294910.14 | 6126683.53 |
| 35775 | 294781.81 | 6127287.45 |
| 35813 | 298394.54 | 6127239.38 |
| 35813 | 298393.41 | 6127232.48 |
| 35938 | 294738.25 | 6128060.42 |
| 35938 | 294733.90 | 6128096.07 |
| 35938 | 294730.17 | 6128133.35 |
| 35938 | 294722.28 | 6128205.64 |
| 35938 | 294720.53 | 6128220.31 |
| 35938 | 294719.19 | 6128231.63 |
| 35938 | 294717.45 | 6128253.33 |
| 35938 | 294713.22 | 6128295.07 |
| 35938 | 294709.27 | 6128324.83 |
| 35938 | 294704.41 | 6128365.27 |
| 35938 | 294702.65 | 6128381.89 |
| 35938 | 294700.26 | 6128399.48 |
| 35938 | 294699.14 | 6128407.71 |
| 35938 | 294693.06 | 6128457.31 |
| 35938 | 294687.35 | 6128507.64 |
| 35938 | 294682.03 | 6128546.50 |
| 35938 | 294670.17 | 6128623.52 |
| 35939 | 294639.93 | 6128682.59 |
| 35939 | 294481.20 | 6128989.11 |
| 36760 | 294930.66 | 6125409.45 |

|       |           |            |
|-------|-----------|------------|
| 36765 | 299065.71 | 6128905.85 |
| 36765 | 299004.14 | 6128798.67 |
| 36765 | 298982.84 | 6128766.47 |
| 36765 | 298875.06 | 6128643.58 |
| 36766 | 299482.94 | 6128437.19 |
| 36766 | 299478.58 | 6128426.34 |
| 36766 | 299502.17 | 6128418.29 |
| 36766 | 299588.34 | 6128388.86 |
| 36766 | 299833.35 | 6128305.19 |
| 36766 | 299955.10 | 6128262.23 |
| 36766 | 299959.71 | 6128260.60 |
| 36766 | 299966.41 | 6128253.96 |
| 36776 | 297844.33 | 6126894.89 |
| 36776 | 297836.06 | 6126856.90 |
| 36776 | 297831.96 | 6126838.62 |
| 36776 | 297826.13 | 6126823.56 |
| 36776 | 297820.37 | 6126800.00 |
| 36776 | 297811.93 | 6126762.96 |
| 36776 | 297798.21 | 6126687.49 |
| 36777 | 297670.54 | 6126710.05 |
| 36777 | 297616.34 | 6126720.83 |
| 36779 | 297828.73 | 6126679.34 |
| 36786 | 296214.06 | 6127156.34 |
| 36786 | 296206.09 | 6127165.71 |
| 36786 | 296215.53 | 6127211.84 |
| 36786 | 296211.40 | 6127211.94 |
| 36787 | 296203.58 | 6127224.37 |
| 36787 | 295931.70 | 6127231.92 |
| 36795 | 295528.17 | 6127265.98 |
| 36795 | 295918.70 | 6127233.08 |
| 36796 | 295520.23 | 6127257.46 |
| 36796 | 295523.00 | 6127224.69 |
| 36797 | 295199.14 | 6127243.92 |
| 36797 | 295521.21 | 6127216.00 |
| 36798 | 294778.32 | 6127284.18 |
| 36798 | 295189.19 | 6127245.18 |
| 36799 | 294771.66 | 6127282.84 |
| 36799 | 294772.13 | 6127270.50 |
| 36800 | 294769.61 | 6127285.03 |
| 36800 | 294498.36 | 6127305.00 |
| 36802 | 297476.58 | 6127410.32 |
| 36802 | 297464.20 | 6127412.47 |
| 36809 | 296135.73 | 6126420.13 |
| 36809 | 296142.58 | 6126421.83 |
| 36809 | 296153.85 | 6126424.80 |
| 36809 | 296172.09 | 6126428.89 |
| 36809 | 296196.13 | 6126433.76 |
| 36809 | 296228.79 | 6126438.24 |
| 36809 | 296318.71 | 6126446.18 |
| 36812 | 296237.23 | 6126307.91 |



|       |           |            |
|-------|-----------|------------|
| 36816 | 295310.40 | 6128002.47 |
| 36825 | 299189.26 | 6128323.93 |
| 36830 | 299046.53 | 6128368.84 |
| 36840 | 296392.16 | 6127936.98 |
| 36842 | 296359.96 | 6127942.10 |
| 36845 | 296301.34 | 6125463.09 |
| 36849 | 296297.49 | 6125376.49 |
| 36849 | 296296.90 | 6125366.52 |
| 36849 | 296278.63 | 6125364.94 |
| 36849 | 296267.78 | 6125364.24 |
| 36849 | 296244.54 | 6125372.16 |
| 36849 | 296234.72 | 6125381.57 |
| 36855 | 294416.89 | 6125117.08 |
| 36857 | 296289.95 | 6127672.17 |
| 36857 | 296280.81 | 6127620.25 |
| 36857 | 296278.19 | 6127606.18 |
| 36867 | 296239.10 | 6125757.32 |
| 36867 | 296295.22 | 6125763.61 |
| 36875 | 296576.29 | 6127428.25 |
| 36875 | 296588.49 | 6127441.67 |
| 36875 | 296620.95 | 6127469.55 |
| 36878 | 294769.51 | 6127951.32 |
| 36878 | 294760.25 | 6128022.93 |
| 36879 | 298547.56 | 6127220.42 |
| 36879 | 298526.93 | 6127202.74 |
| 36879 | 298542.25 | 6127183.29 |

[LABELS]

| ;X-Coord | Y-Coord | Label & Anchor | Node |
|----------|---------|----------------|------|
|----------|---------|----------------|------|

[BACKDROP]

|            |           |            |           |
|------------|-----------|------------|-----------|
| DIMENSIONS | 292674.11 | 6123901.60 | 300311.17 |
| 6131689.42 |           |            |           |
| UNITS      | Ninguno   |            |           |
| FILE       |           |            |           |
| OFFSET     | 0.00      | 0.00       |           |

[END]
